# Supplementary material for: Analysis of the Cerebrospinal Fluid Proteome in Alzheimer's Disease
Source: PubMed Central journal article supplement (PMC4780771; doi:10.1371/journal.pone.0150672), 2016-03-07

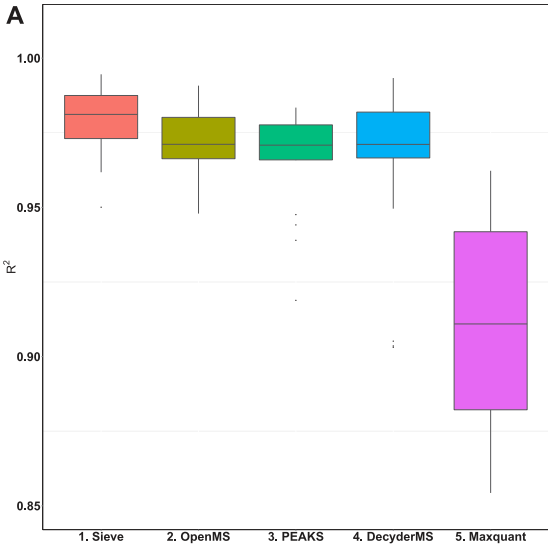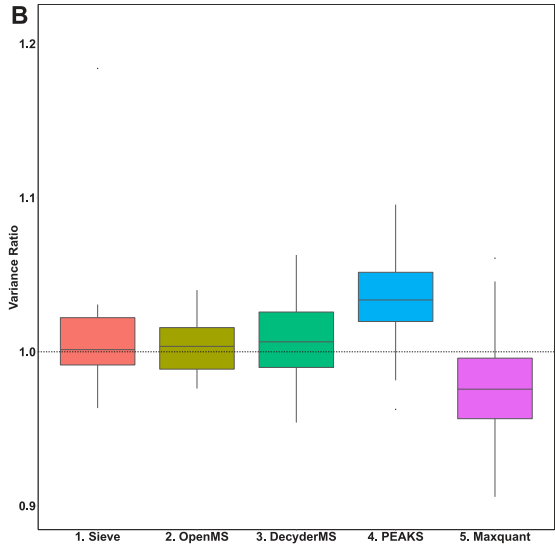

Supplement: pone.0150672.s027.pdf [file pone.0150672.s027.pdf]
