# Supplementary material for: Analysis of the Cerebrospinal Fluid Proteome in Alzheimer's Disease
Source: PLoS One. 2016 Mar 7;11(3):e0150672. doi: 10.1371/journal.pone.0150672 (PMC4780771; doi:10.1371/journal.pone.0150672)
Supplement: S2 DataFile — (XLSX) [file pone.0150672.s002.xlsx]

## Sheet: DecyderMS_median_normalized_dat
S2 DataFile. DecyderMS median normalized data quantification data.
Protein (Uniprot ID)	Peptide	A	Coef	t	p.value	F	F.p.value	AD1_1	AD1_2	AD2_1	AD2_2	AD3_1	AD3_2	AD4_1	AD4_2	AD5_1	AD5_2	AD6_1	AD6_2	AD7_1	AD7_2	AD8_1	AD8_2	AD9_1	AD9_2	AD10_1	AD10_2	C1_1	C1_2	C2_1	C2_2	C3_1	C3_2	C4_1	C4_2	C5_1	C5_2	C6_1	C6_2	C7_1	C7_2	C8_1	C8_2	C9_1	C9_2	C10_1	C10_2
1433B_HUMAN	NLLSVAYK	-0.82	0.214	0.66	0.52114	0.44	0.52114	NA	NA	NA	NA	NA	-1.00078	NA	NA	NA	NA	NA	NA	NA	NA	-0.84441	-0.8092	-0.67519	-0.38403	NA	-0.74239	-1.10286	NA	-0.95497	-0.68503	-1.04668	NA	NA	NA	NA	NA	NA	NA	NA	NA	NA	NA	NA	NA	NA	NA
1433B_HUMAN	DSTLIMQLLR	-1.54	0.321	1.3	0.20205	1.68	0.20205	-1.85523	-1.8912	-0.9109	-0.58356	-1.64713	-1.76729	-1.94488	-1.84959	-0.93988	-1.13215	-0.90865	-0.75193	-1.67904	-1.95715	-0.97946	-0.91752	-1.48796	-2.25647	-1.08485	-1.07604	-1.10319	-1.59255	-1.33498	-1.16753	-1.36636	-1.34118	-3.23227	-3.17666	-1.16079	-1.34601	-2.17474	-1.91823	-1.34691	-1.56038	-1.59788	-2.2885	-2.41014	-1.92642	-1.08866	-0.905895
1433E_HUMAN	LICCDILDVLDK	-2.7	0.776	2.01	0.06397	4.03	0.06397	NA	NA	-1.8493	-1.56171	NA	NA	NA	NA	NA	NA	-2.8301	-2.24376	NA	NA	-2.65057	-3.04332	-2.63971	-2.53618	NA	-2.67818	NA	NA	NA	NA	-3.22109	NA	NA	NA	-3.19436	-3.43344	NA	NA	NA	NA	NA	-3.18755	NA	NA	NA	NA
1433Z_HUMAN	DICNDVLSLLEK	-2.64	-0.261	-0.52	0.61126	0.27	0.61126	-3.51994	-3.29232	NA	NA	NA	NA	NA	-3.04702	NA	NA	NA	NA	NA	NA	-1.87768	NA	NA	NA	-2.63022	-2.67969	NA	-2.7079	-2.29298	-2.66378	-3.23876	-2.11438	NA	NA	NA	NA	NA	NA	NA	NA	NA	NA	NA	NA	-2.35308	-1.94493
4F2_HUMAN	GQSEDPGSLLSLFR	-2.93	-0.071	-0.24	0.8099	0.06	0.8099	NA	-2.56757	NA	-3.43482	-3.31836	NA	-3.65708	-3.04047	NA	NA	-3.10601	-2.65597	NA	NA	NA	-2.90297	NA	NA	NA	-2.64034	NA	-2.87106	-3.62078	NA	NA	NA	NA	NA	-2.20898	-2.43728	-3.69434	NA	-2.42908	-2.30297	-3.05968	NA	NA	-2.79237	NA	NA
7B2_HUMAN	VSEADIQR	-1.51	NA	NA	NA	NA	NA	NA	NA	NA	NA	NA	NA	NA	NA	NA	NA	NA	NA	NA	NA	NA	NA	-1.81821	-1.19227	NA	NA	NA	NA	NA	NA	NA	NA	NA	NA	NA	NA	NA	NA	NA	NA	NA	NA	NA	NA	NA	NA
7B2_HUMAN	SVNPYLQGQR	2.75	0.434	2.23	0.0315	4.96	0.0315	2.4243	2.85775	2.53197	2.82095	3.17888	3.18205	2.95633	3.02957	3.08614	3.02288	2.27729	2.53926	2.82275	3.14896	3.07528	3.06274	3.44158	3.63026	2.9162	3.25711	2.82161	2.8889	2.67913	2.807	2.80427	3.01853	0.96341	1.62644	2.66272	2.71269	2.05693	2.35959	2.69793	2.95417	2.51415	2.59355	2.88308	2.81029	2.28621	2.44034
7B2_HUMAN	SVPHFSDEDKDPE	3.61	0.462	2.67	0.01073	7.14	0.01073	3.46597	3.83486	3.61442	4.04981	3.82089	3.91942	3.98163	3.94334	4.02323	3.86537	3.3378	3.58598	3.6179	3.88603	3.78292	3.7174	4.20098	4.35253	3.7497	4.1128	3.52536	3.65538	3.42902	3.46577	3.50244	3.71253	2.15052	2.62141	3.56888	3.73364	2.90038	3.16303	3.59024	3.74439	3.59095	3.69509	3.65318	3.54843	3.12601	3.25174
7B2_HUMAN	KSVPHFSDEDKDPE	0.55	0.48	2.69	0.01016	7.26	0.01016	0.37936	0.35818	0.62651	0.82311	0.81967	0.76934	1.37058	1.17924	1.15249	0.7035	0.15984	0.74694	0.58293	0.80299	0.86533	0.5781	1.16351	1.25336	0.573335	0.85105	0.322985	0.501375	0.47402	0.63666	0.59992	0.50535	-0.31608	-0.106975	0.42507	0.42548	-0.16116	0.070155	0.40757	0.595555	0.65671	0.78001	0.794515	0.53535	-0.47212	-0.523285
7B2_HUMAN	TADDGCLENTPDTAEFSR	0.08	0.355	1.51	0.13927	2.28	0.13927	0.04727	0.19244	0.54584	0.9832	NA	0.04478	-0.11808	0.244595	0.70137	0.48964	-0.67372	-0.04294	-0.16658	0.03043	0.07429	0.29214	0.90681	1.01745	-0.146725	0.3009	-0.213075	0.236085	-0.74599	-0.14532	NA	-0.32064	NA	NA	0.17853	0.15942	-1.08926	-1.11462	0.45728	0.557595	0.1989	0.22514	0.348075	0.24412	-0.59149	-0.160095
7B2_HUMAN	DFSEDQGYPDPPNPCPVGK	0.88	0.469	1.68	0.1017	2.81	0.1017	1.17215	1.45219	1.06063	1.24855	1.10741	1.38837	0.87375	1.38599	1.11177	1.0473	0.0386	0.14233	0.27188	0.81935	1.00956	1.31174	2.04239	1.98453	0.913655	1.67691	0.843605	1.1769	0.49518	1.18092	0.42297	0.95855	NA	NA	0.28122	0.54967	-0.88392	-0.478045	0.63298	1.48995	0.70725	0.62381	0.675525	0.80908	0.92156	1.00833
7B2_HUMAN	EFQLHQHLFDPEHDYPGLGK	1.2	0.221	1.06	0.29674	1.12	0.29674	1.4019	NA	2.33138	2.14478	0.66251	0.74042	1.16534	1.47599	1.4899	1.2402	0.93379	1.17442	1.20961	1.16697	1.50495	1.61933	0.80549	NA	1.21385	1.35064	1.51309	NA	0.49103	NA	0.69298	0.99823	0.36639	0.324375	1.50645	1.31072	0.29084	0.374265	1.24969	1.48523	1.90009	1.75298	1.14882	1.73296	1.17032	NA
A1AG1_HUMAN	TEDTIFLR	3.92	-0.752	-3.58	0.0009	12.8	0.0009	3.49755	3.77331	2.22589	2.4209	3.37041	3.44687	3.39775	3.55574	2.71357	2.58246	3.79856	4.01219	4.20948	4.39447	3.73279	3.67061	3.94821	4.21818	3.80819	4.19297	4.06255	4.18828	3.96352	4.3683	4.34593	4.33793	4.93557	4.97217	4.91293	4.87982	4.66623	4.69853	3.06203	3.30377	4.16673	4.16083	4.23166	4.2853	4.13043	4.33908
A1AG1_HUMAN	SDVVYTDWK	4.37	-0.975	-3.93	0.00032	15.43	0.00032	4.03901	4.04245	1.63591	1.88735	3.6578	3.53018	4.07503	4.22633	3.17451	2.89314	4.23805	4.4745	4.70858	4.80916	4.2469	4.19552	4.34131	4.38628	4.41509	4.69098	4.44306	4.52928	4.54633	4.82958	4.76899	4.77836	5.62564	5.74543	5.53813	5.51655	5.35767	5.40238	3.65249	3.76677	4.72488	4.70351	4.96368	4.84463	4.64199	4.79852
A1AG1_HUMAN	WFYIASAFR	3.53	-1.353	-3.73	0.00058	13.89	0.00058	2.734	2.98562	2.77934	2.7024	2.43823	2.18831	2.97818	3.24737	2.52416	2.39006	4.06212	4.18658	4.49911	4.22063	3.44759	4.01208	0.48811	-0.59558	2.74451	3.09107	3.72492	3.45419	3.56224	3.7831	3.97191	3.7239	5.47471	5.76738	5.15202	5.15868	4.67309	4.71873	3.08746	3.20072	4.54873	4.2693	4.06369	4.47775	3.47927	3.8923
A1AG1_HUMAN	SDVVYTDWKK	1.17	-0.852	-3.09	0.00363	9.57	0.00363	0.85659	0.69263	NA	NA	0.50052	0.22371	1.22498	0.802675	-0.74114	-0.76223	1.02506	1.07407	1.6406	1.50906	0.56948	0.76006	1.00395	0.54462	1.05269	1.00166	1.02397	0.746205	1.69913	0.90821	1.87222	1.77731	2.78479	2.4979	2.44047	2.37773	2.45054	2.3098	0.04944	-0.111075	1.37687	1.48772	1.40112	1.49066	1.47364	1.39715
A1AG1_HUMAN	TYMLAFDVNDEK	4.4	-0.763	-2.25	0.03012	5.04	0.03012	4.90597	4.60179	2.22513	2.68295	4.17727	4.21645	4.68222	4.24374	2.87965	2.51165	4.16112	3.61568	4.61822	4.67399	4.4646	3.22353	4.49858	4.38508	5.15721	4.52709	4.79467	4.65376	5.27127	4.88994	5.23481	5.25237	5.45167	5.25892	5.25646	4.69379	5.48235	5.16315	3.92497	3.09836	3.96256	3.92047	4.54246	3.89851	5.58181	5.37758
A1AG1_HUMAN	NWGLSVYADKPETTK	5.16	-0.807	-4.06	0.00021	16.5	0.00021	4.92098	4.8357	3.97483	4.09967	4.23534	4.15816	4.90895	5.04347	4.02787	3.85003	5.1488	5.3087	5.46081	5.51364	4.81972	4.93175	4.70339	4.65244	5.17882	5.41219	5.13955	5.21479	5.14124	5.42255	5.38322	5.42529	6.47042	6.45556	6.30667	6.23657	6.13835	6.07657	4.30593	4.50624	5.49237	5.48902	5.51133	5.60607	5.39365	5.60609
A1AG1_HUMAN	EQLGEFYEALDCLR	5.72	-0.94	-4.41	7e-05	19.46	7e-05	5.31896	5.54757	4.43945	4.6158	4.86129	5.0128	5.21752	5.46392	4.5093	4.42449	5.79038	6.00141	6.12679	6.17778	5.37147	5.48288	4.82352	4.56699	5.58456	5.67972	5.70955	5.81398	5.5699	5.85176	6.23382	6.20219	6.90219	7.15513	6.82793	6.76216	6.70536	6.70083	5.2256	5.33179	6.32351	6.1483	6.083	6.35421	5.66954	6.24946
A1AG1_HUMAN	YVGGQEHFAHLLILR	4.41	-0.799	-1.6	0.11678	2.57	0.11678	4.42572	4.5418	3.41892	3.40458	3.75313	4.02999	4.21865	4.46711	3.16695	2.9738	4.47201	4.67057	4.87108	4.88138	3.90156	4.14133	3.0345	2.97857	4.27738	4.62336	4.63821	4.70054	4.5826	4.88564	5.19488	5.1595	2.06023	5.98862	5.76801	5.71742	5.4769	5.36142	3.42715	3.64077	5.19994	5.07488	4.62261	5.00019	4.74532	4.97982
A1AG1_HUMAN	NWGLSVYADKPETTKEQLGEFYEALDCLR	2.47	-0.971	-2.53	0.01549	6.4	0.01549	1.77434	1.26881	2.47315	2.28655	0.85266	0.53832	1.97687	2.15431	1.21648	1.00568	3.10291	2.9608	3.3519	2.806	2.13375	2.46806	NA	NA	1.43074	1.50506	1.97124	1.20376	2.98645	3.04756	2.06028	1.78334	5.16954	5.28894	4.26666	4.07616	3.85542	3.87342	1.22656	0.946335	3.34362	3.07389	2.61407	3.25192	2.07768	2.52557
A1AG2_HUMAN	SDVMYTDWK	3.01	-0.456	-2.25	0.02968	5.07	0.02968	2.73522	2.62189	3.54776	3.67979	2.46297	2.181	2.3975	2.58488	1.96515	1.70327	2.97467	3.20598	3.34083	3.35057	3.02842	3.08012	2.78931	2.70917	2.47669	2.77889	3.32177	3.30884	3.23325	3.41963	3.33168	3.92586	4.07108	4.06825	3.5239	3.40707	3.62423	3.60995	2.28289	2.28071	3.12336	3.05935	2.48075	2.61703	2.91388	3.1298
A1AG2_HUMAN	EHVAHLLFLR	1.62	-0.796	-3.44	0.00134	11.83	0.00134	1.64548	1.79827	0.40569	0.29602	1.04097	1.18853	1.20391	1.37112	0.74893	0.93336	1.84585	2.23664	2.31774	2.31699	1.19232	1.59857	0.12582	0.37061	0.899205	0.92341	2.18343	2.18472	1.5076	1.77751	2.11602	2.25443	2.98903	2.96353	2.27462	2.44362	2.68541	2.43796	0.82132	1.02626	2.25207	2.10913	1.22937	1.55457	1.65276	1.91823
A1AG2_HUMAN	TLMFGSYLDDEK	3.31	-0.56	-2.8	0.00769	7.85	0.00769	3.16233	3.28831	1.89792	2.04381	2.82861	2.74843	2.85063	3.10019	2.53411	2.21433	3.53575	3.5893	3.77939	3.85633	3.3272	3.3859	3.04379	3.20594	2.89547	3.23382	3.70935	3.81871	3.45251	3.78253	3.69321	3.77144	4.40348	4.47234	3.90899	3.82388	4.0253	3.81475	2.63617	2.89929	3.53973	3.4607	2.59827	2.88937	3.47991	3.53483
A1AG2_HUMAN	NWGLSFYADKPETTK	3.49	-0.025	-0.06	0.95524	0	0.95524	3.45995	3.33203	NA	NA	3.2096	3.23684	3.53556	3.58725	3.17251	NA	4.31154	3.51576	4.09855	2.78262	3.8287	3.89088	3.10716	2.92983	3.19891	3.62264	3.97179	3.96442	3.85975	4.16193	3.82697	3.84342	NA	NA	NA	NA	4.13947	4.41791	2.8938	3.19835	NA	2.52464	1.16468	3.57626	3.57397	3.74799
A1AG2_HUMAN	EQLGEFYEALDCLCIPR	3.2	-0.752	-2.84	0.00699	8.06	0.00699	2.78188	3.0514	2.21639	2.56504	2.19993	2.55259	2.6084	2.89159	2.70281	2.6659	3.80626	3.9118	3.88714	3.75598	3.38234	3.48163	1.84774	0.96697	2.75258	2.53881	3.53925	3.22911	3.06041	3.34824	3.30311	3.62327	4.48792	4.6655	3.86199	3.86466	4.05993	4.03761	3.03664	3.27324	3.88436	3.62949	2.68513	3.24544	3.095	3.67618
A1AT_HUMAN	SVLGQLGITK	-1.62	NA	NA	NA	NA	NA	NA	NA	NA	NA	NA	NA	NA	NA	NA	NA	NA	NA	NA	NA	NA	NA	NA	NA	NA	NA	NA	NA	NA	NA	NA	-1.62212	NA	NA	NA	NA	NA	NA	NA	NA	NA	NA	NA	NA	NA	NA
A1BG_HUMAN	CLAPLEGAR	1.63	-0.031	-0.15	0.87906	0.02	0.87906	1.03948	1.323	0.73299	0.97313	1.79787	1.89069	1.78549	1.16431	1.17346	1.12068	1.88198	1.9703	2.00222	2.09647	1.66283	1.69371	2.10085	2.1216	1.80208	2.03789	1.92431	1.71006	2.38542	1.81095	1.81404	2.01705	2.11444	2.14746	1.45094	1.48451	1.83038	2.34432	1.0076	1.2709	1.10262	1.07963	1.76537	1.43489	1.1343	1.16221
A1BG_HUMAN	ATWSGAVLAGR	2.74	-0.151	-0.93	0.35695	0.87	0.35695	2.56642	2.59581	1.73906	1.84539	2.71665	2.59777	2.80846	2.94215	2.23793	2.07453	2.97725	2.93719	2.99897	3.1103	2.86316	2.80434	2.91917	2.9255	2.7046	2.98074	3.05321	3.13273	3.12464	3.42896	2.87785	2.8822	3.47993	3.51228	2.51262	2.42389	3.22901	3.24965	2.29177	2.20926	2.30233	2.30004	2.67259	2.67331	2.38035	2.6355
A1BG_HUMAN	SGLSTGWTQLSK	3.32	-0.093	-0.47	0.64309	0.22	0.64309	3.06561	3.25894	2.36615	2.69752	3.11136	3.14581	3.25105	3.56573	3.12065	2.75409	3.54093	3.81404	3.47991	3.72776	3.26267	3.33447	3.38773	3.59179	3.29399	3.65618	3.60213	3.70872	3.63049	3.98258	3.24064	3.3947	4.20946	4.48803	3.03204	3.11038	3.71519	3.94869	2.46141	2.79788	2.77817	2.68035	3.26372	3.2325	2.866	3.14278
A1BG_HUMAN	HQFLLTGDTQGR	3.91	0.087	0.26	0.7978	0.07	0.7978	3.59242	3.64526	3.41045	3.33869	3.92678	3.85442	4.3749	3.95507	3.61176	3.52216	4.29931	4.31036	4.35912	4.31944	4.13452	4.05085	4.08527	3.87762	4.16371	4.28868	4.32456	3.93813	4.5724	4.05764	4.13197	4.20779	4.54708	1.98358	3.93621	3.89053	4.08622	4.45556	3.47731	3.55645	3.62204	3.50042	4.14497	3.9553	3.65578	3.34178
A1BG_HUMAN	CEGPIPDVTFELLR	2.26	-0.337	-1.65	0.10729	2.71	0.10729	2.03466	2.1548	1.76706	1.70091	1.62344	1.77913	2.00709	2.25596	1.89631	1.8109	2.66224	3.03854	2.79275	2.81726	2.38735	2.24165	1.32532	1.10935	2.02865	2.43166	2.47946	2.43358	2.45933	2.81165	2.39027	2.41264	3.26179	3.71719	2.14446	2.10234	2.94572	3.0654	1.93601	1.92637	1.96845	1.79119	2.12282	2.33979	1.95415	2.34233
A1BG_HUMAN	NGVAQEPVHLDSPAIK	3.16	-0.032	-0.16	0.87422	0.03	0.87422	3.01999	3.23126	2.23349	2.33997	3.10372	3.17091	3.3244	3.56657	2.71194	2.62104	3.39924	3.54332	3.16851	3.46727	3.11015	3.09093	3.42083	3.62009	3.08089	3.66275	3.36886	3.55669	3.47312	3.92502	3.07477	3.28264	4.19598	4.17209	2.84133	2.79145	3.55691	3.71152	2.33974	2.50197	2.58647	2.5839	2.84918	2.90012	2.73789	3.0775
A1BG_HUMAN	LELHVDGPPPRPQLR	0.26	-0.23	-0.93	0.35886	0.86	0.35886	0.32535	0.11746	-0.58482	-0.68124	-0.24234	-0.39691	0.66517	0.831085	-0.58949	-0.72501	0.8095	1.10834	0.71611	0.61207	-0.12248	-0.09084	0.00708	0.20776	0.568065	0.26852	0.778105	0.661795	0.40143	0.7586	0.44837	0.65904	2.19136	1.86265	-0.00069	-0.14877	1.20273	0.902725	-0.82349	-0.935615	0.01434	-0.3081	-0.157415	0.17082	-0.15327	-0.127855
A1BG_HUMAN	VTLTCVAPLSGVDFQLR	4.97	-0.302	-1.65	0.10754	2.71	0.10754	4.42321	4.75669	4.65383	4.72295	4.47231	4.38341	4.68614	4.80999	4.6665	4.69297	5.43919	5.63047	5.39483	5.38666	4.96675	5.10881	4.28975	4.02535	4.88406	5.0044	5.25136	4.97347	4.9792	5.24828	4.89634	4.983	5.93397	6.31851	5.20012	5.28129	5.35458	5.46314	4.72134	4.84755	4.84278	4.51044	4.8591	5.05711	4.6495	5.06785
A1BG_HUMAN	IFFHLNAVALGDGGHYTCR	3.56	-0.292	-0.85	0.40053	0.72	0.40053	3.7439	3.69183	1.0984	2.2917	3.59417	3.56682	4.10265	4.15435	3.24461	3.09741	3.69382	4.17663	4.05171	4.17444	4.08363	3.94873	1.94002	1.54937	3.95437	4.03937	4.35567	4.11843	4.36503	4.41833	4.06803	4.02424	4.19779	4.66946	3.53262	3.46346	4.49823	4.46232	2.89982	3.15739	1.62746	2.44003	2.78394	3.60106	3.83584	3.51425
A1BG_HUMAN	SLPAPWLSMAPVSWITPGLK	2.84	-0.833	-1.37	0.17655	1.89	0.17655	2.44336	2.28025	3.19444	3.48654	1.04584	0.93223	2.54093	3.0261	2.62988	2.42011	4.11625	4.13113	3.47971	3.49838	3.131	3.67121	0.3715	-3.58697	2.7359	2.8653	2.93067	2.55992	3.00037	3.30847	2.73971	2.48847	4.51223	5.14741	3.4166	3.47644	3.54583	3.70097	2.90078	3.0029	2.67219	2.73557	3.07705	3.77468	2.90246	3.17311
A1BG_HUMAN	TPGAAANLELIFVGPQHAGNYR	3.91	-0.371	-1.31	0.19681	1.72	0.19681	3.97246	2.49707	3.54685	3.41089	3.44086	3.33578	4.16081	3.9897	3.70203	3.58195	4.79317	4.67936	4.50429	4.23194	3.90611	4.16316	2.4905	2.05364	4.26049	3.86948	4.28493	3.85844	4.1943	4.00218	3.92818	3.56473	5.27196	5.30769	4.18437	4.05794	4.66216	4.58078	3.7818	3.74689	3.93059	3.99877	4.01488	4.03157	3.38432	3.21726
A1BG_HUMAN	SWVPHTFESELSDPVELLVAES	3.6	-0.369	-1.24	0.22333	1.53	0.22333	3.29054	3.21692	3.62704	3.46724	2.61542	2.26932	3.47075	3.88487	3.28187	3.1051	4.39003	4.38929	4.22943	4.07296	3.86783	4.1702	1.03787	NA	3.57344	3.88914	3.59183	3.34707	3.13702	3.82282	3.31903	3.27547	4.95436	5.32597	3.68779	3.75723	4.04021	4.32913	3.41072	3.23986	2.97125	2.99189	3.40912	4.0642	3.8147	4.18529
A1BG_HUMAN	LHDNQNGWSGDSAPVELILSDETLPAPEFSPEPESGR	3.23	-0.401	-1.39	0.17207	1.93	0.17207	2.859	3.1068	2.71916	2.83195	2.29622	2.2353	3.24384	3.48588	3.01925	2.95335	3.9967	4.09184	3.88805	3.65159	3.44168	3.49538	1.88171	0.54888	3.42189	3.43845	3.44836	3.08696	3.44503	3.62483	3.09207	3.10903	4.53648	4.73968	3.07244	3.0063	3.91233	4.12946	3.11522	3.07809	3.19917	2.94965	3.03979	3.53111	2.97726	3.53084
A1BG_HUMAN	TDGEGALSEPSATVTIEELAAPPPPVLMHHGESSQVLHPGNK	0.45	-0.239	-0.68	0.50278	0.46	0.50278	0.2144	NA	NA	NA	NA	NA	-0.58157	-0.233685	NA	NA	0.59903	0.91065	0.72513	0.48594	NA	-0.50992	NA	NA	0.324745	0.58427	0.182055	0.748595	0.70089	0.85086	NA	-0.11175	1.96133	2.00541	NA	-0.37591	1.70941	1.50195	NA	-0.624985	NA	NA	-0.285815	-0.21434	NA	0.214125
A2AP_HUMAN	FDPSLTQR	-1.28	0.608	0.79	0.4338	0.63	0.4338	-1.86033	-1.40166	-2.76126	-2.02862	-0.61771	-0.60201	NA	-2.11841	NA	NA	-2.84208	NA	NA	-2.96798	NA	NA	2.59635	2.7698	0.003835	0.44705	-2.21984	-2.66714	1.28374	-1.12597	NA	-0.59142	-4.56648	NA	NA	-3.48121	-1.21283	-0.689655	NA	NA	-1.74409	-3.04895	-0.280715	NA	-1.44294	-1.42047
A2AP_HUMAN	NKFDPSLTQR	-2.68	0.26	0.77	0.44891	0.6	0.44891	NA	NA	NA	NA	-3.48558	NA	NA	NA	NA	NA	NA	NA	NA	-2.56623	-3.16814	NA	-1.618	-1.80203	NA	-2.32832	-2.49418	-2.90392	-3.51335	NA	-2.63154	NA	-2.40933	-2.26961	NA	NA	-2.61564	-2.5257	NA	NA	NA	-3.75626	NA	-2.85278	NA	NA
A2AP_HUMAN	LGNQEPGGQTALK	0.78	0.163	0.54	0.59537	0.29	0.59537	-0.10426	0.30971	-0.34813	0.17882	0.87267	1.00568	0.60587	0.797165	0.95708	0.68203	0.67486	1.35405	0.90419	1.4422	0.87828	0.65961	1.59862	2.01144	1.07544	1.765	0.682045	1.10159	1.01126	1.41076	0.73427	1.04585	1.63942	2.27675	-0.02511	0.37571	1.02936	1.50568	-0.30965	0.061935	0.03706	0.26479	1.01768	0.38778	-0.39622	0.199655
A2AP_HUMAN	QEDDLANINQWVK	0.25	0.316	0.87	0.39118	0.76	0.39118	NA	NA	-1.21304	-0.76211	NA	NA	NA	NA	-0.26779	-0.46183	0.44957	NA	0.64608	NA	0.69105	0.76838	0.99621	1.00166	1.28577	1.79997	NA	NA	NA	NA	NA	NA	0.58881	NA	-0.26171	-0.27553	0.78641	1.24084	-0.60183	-0.173615	-0.54266	-0.64487	0.264595	0.44909	NA	NA
A2AP_HUMAN	LQQVLHAGSGPCLPHLLSR	1.38	-0.174	-0.79	0.43127	0.63	0.43127	1.14224	1.13377	0.42635	0.50524	0.92122	0.92741	1.1138	1.37606	1.20257	0.83631	1.44893	2.07886	1.56852	1.77185	1.56063	1.47984	1.24089	1.52429	1.6903	1.94329	1.94901	2.00714	1.12718	1.63975	1.55743	1.66997	2.75914	2.65922	1.25054	1.13909	1.66608	1.86681	0.23376	0.588345	1.19225	1.27495	1.52733	1.5758	0.80142	0.884675
A2AP_HUMAN	WFLLEQPEIQVAHFPFK	1.11	-0.471	-1.26	0.21556	1.58	0.21556	-0.51452	-0.16225	1.51327	1.39135	-0.78531	-1.05138	-0.74477	0.197805	1.18598	0.90099	1.90657	2.29809	1.86893	1.7817	1.43836	1.72371	NA	NA	1.13091	1.364	1.10133	0.933715	0.35502	0.94564	0.61531	1.04487	2.77021	3.07722	1.49988	1.45416	1.78415	1.79696	0.62257	1.09848	1.52429	1.16943	1.5274	2.25383	-0.00072	1.00554
A2AP_HUMAN	EDFLEQSEQLFGAKPVSLTGK	-1.5	-1.998	-2.01	0.10826	4.05	0.10826	NA	NA	NA	NA	NA	-2.83287	NA	NA	NA	NA	NA	NA	NA	NA	NA	NA	NA	NA	NA	NA	NA	NA	NA	NA	NA	NA	-1.09391	-0.576795	NA	NA	NA	NA	NA	NA	NA	NA	NA	NA	NA	NA
A2AP_HUMAN	GFPIKEDFLEQSEQLFGAKPVSLTGK	1.83	-0.365	-1.7	0.09756	2.87	0.09756	1.34512	1.3369	1.02195	1.31566	0.84409	1.23371	1.20679	1.32639	1.85346	1.85042	2.27167	2.49991	2.05322	1.97361	2.19055	2.04637	1.13687	0.49374	2.47323	2.43419	2.06874	1.90386	1.70744	1.73041	1.67277	1.91941	2.79601	3.13327	1.82352	1.69798	2.4894	2.40252	1.64831	1.61691	2.01209	1.66159	2.25571	2.41783	1.4185	1.83624
A2GL_HUMAN	GQTLLAVAK	1.4	-0.896	-2.4	0.02776	5.77	0.02776	NA	NA	NA	NA	NA	NA	NA	NA	NA	NA	NA	NA	0.68735	0.71948	NA	NA	0.46506	NA	NA	NA	1.07593	NA	1.35452	NA	2.28057	2.3055	NA	1.34916	2.30593	2.25007	1.23109	1.67437	NA	NA	1.37068	1.27988	NA	1.11483	0.99115	NA
A2GL_HUMAN	YLFLNGNK	0.78	-1.377	-3.2	0.00283	10.22	0.00283	-0.3025	NA	NA	NA	0.66001	0.82118	0.21328	-1.82696	NA	-2.13923	-0.79436	-0.16218	0.47048	0.95632	0.24904	0.91425	0.15071	0.85343	0.231365	0.98251	1.09193	1.42254	1.22955	1.83912	2.08569	2.33986	1.69209	1.38357	2.19223	2.13772	1.52399	1.70583	-0.55621	-0.196445	1.0881	1.13487	1.06476	1.36444	0.8782	1.28635
A2GL_HUMAN	VAAGAFQGLR	0.99	-1.272	-4.93	1e-05	24.31	1e-05	0.27962	0.43385	-0.98577	-0.96461	1.19761	1.23309	0.55143	0.642405	-1.24848	-1.22337	0.02141	0.14412	0.96828	1.04502	0.93795	0.94315	0.68913	0.84241	0.773665	0.88433	1.5251	1.55401	1.72858	1.94066	2.5574	2.52117	1.51108	2.01404	2.52107	2.37857	2.19228	2.06914	0.09927	-0.056015	1.51761	1.27724	1.50465	1.40361	1.14617	1.19233
A2GL_HUMAN	ALGHLDLSGNR	-0.35	-0.749	-2.53	0.01573	6.39	0.01573	-1.89702	-0.7481	-0.68024	-0.38176	-0.87573	-0.98291	-1.0118	-1.40254	-0.54145	-0.56595	NA	NA	-0.41315	-0.5346	-0.95914	-0.6283	-0.47286	-0.25059	-0.800585	-0.26415	-0.216005	-0.453505	-0.56628	-1.30777	0.87465	1.17639	-0.11221	0.504115	0.89342	0.91102	0.0568	0.558835	NA	-0.423105	-0.59798	0.10986	-0.252935	-0.02825	-0.34035	-0.357665
A2GL_HUMAN	DLLLPQPDLR	1.2	-1.147	-4.55	5e-05	20.7	5e-05	0.83103	0.9149	-0.88487	-0.77914	1.2741	1.31124	0.7446	1.10316	-0.63612	-0.91058	0.26777	0.32605	1.37796	1.3212	1.06642	1.03985	0.89121	1.19459	0.880745	1.13859	1.62528	1.57008	1.59016	1.93938	2.72997	2.84428	1.96658	2.11492	2.54325	2.48489	2.28659	2.22472	0.29007	0.452285	1.69037	1.47713	1.32835	1.4193	1.52797	1.31424
A2GL_HUMAN	ENQLEVLEVSWLHGLK	1.89	-1.574	-5.42	0	29.34	0	1.08084	1.49364	0.64907	0.81695	1.19404	1.54618	1.33391	1.48301	0.27548	0.00698	1.28981	1.3307	2.0507	1.74042	1.91315	1.88131	-1.38699	NA	1.43925	1.49787	2.47709	2.02888	2.25013	2.42189	3.06344	3.17087	3.37097	3.55007	3.41455	3.34425	2.9229	3.01952	1.34108	1.09861	2.94253	2.61187	2.29055	2.53284	1.93721	2.36721
A2GL_HUMAN	TLDLGENQLETLPPDLLR	0.46	-1.75	-5.66	0	32.08	0	-0.50653	0.07204	-2.06225	-1.48244	0.18537	0.3881	-0.38443	-0.071695	-2.05613	-2.01795	-0.69811	-0.33348	0.53074	0.60351	0.20321	0.4127	-0.65774	-0.84044	0.074095	0.37422	0.776205	0.828365	0.92783	1.23674	2.37959	2.39811	1.59506	2.02649	2.24254	2.31953	1.888	1.91646	-0.21831	-0.000695	1.55856	1.23182	0.863515	1.32152	0.3746	1.07261
A2GL_HUMAN	NALTGLPPGLFQASATLDTLVLK	0.46	-1.621	-3.34	0.002	11.18	0.002	NA	NA	-1.45327	-1.55248	-1.08143	-2.00217	0.40257	0.791245	NA	NA	-0.53618	-0.68459	1.1838	1.30203	1.01415	1.25708	-3.1597	NA	-0.685345	0.05909	-0.421425	-1.17518	1.12542	1.4238	2.03721	2.06654	2.80135	3.26363	NA	NA	0.82121	1.10044	0.76201	0.403375	0.67023	0.45573	1.38589	1.8507	0.77847	1.0053
A2GL_HUMAN	DGFDISGNPWICDQNLSDLYR	-0.34	-1.642	-3.95	0.00038	15.64	0.00038	NA	-2.17362	-2.21997	NA	-2.45538	NA	NA	-1.12122	NA	NA	-1.62108	-1.35232	-0.11223	-0.81703	-0.79025	0.08474	NA	NA	-1.47168	-1.14697	-0.715615	-1.12498	-0.95322	-0.58656	0.58651	0.73194	1.0027	1.39055	1.39399	1.27143	0.77532	1.04283	-1.1968	-0.856635	0.79007	0.43279	-0.185995	0.89284	-0.73198	0.409755
A2GL_HUMAN	LQELHLSSNGLESLSPEFLRPVPQLR	2.04	-1.493	-5.92	0	35.03	0	1.5835	1.61564	NA	0.73168	1.37072	1.51263	1.54964	1.5674	0.38815	0.41912	1.28124	1.40785	2.21188	1.99386	1.9116	1.9995	-0.04938	-0.54069	1.63226	1.78296	2.29832	2.39593	2.37156	2.50113	3.37026	3.30336	3.17879	3.30314	3.59908	3.66388	3.29881	3.05436	1.47325	1.50113	3.10975	2.77005	2.45056	2.84888	2.00682	2.54449
A2MG_HUMAN	TGTHGLLVK	2.37	-0.107	-0.82	0.41953	0.66	0.41953	2.11746	2.40964	2.37581	2.32392	2.09489	2.03588	2.2769	2.10099	2.57792	2.25079	2.20562	2.67557	2.24707	2.48507	2.27562	2.44316	2.3098	2.26249	2.44278	2.44009	2.41445	2.46195	2.63239	2.85834	2.29018	2.32313	2.56609	2.46272	2.48534	2.4325	2.51861	2.57052	2.23619	2.46481	2.0704	2.04224	2.39223	2.40364	2.37213	2.48796
A2MG_HUMAN	FQVDNNNR	-0.6	0.313	0.32	0.74877	0.1	0.74877	-0.76872	-0.18718	-2.82833	0.35847	0.50808	0.35769	-1.81571	-0.085585	0.70901	-0.5605	-2.21225	0.30879	-1.80961	0.35869	0.56596	NA	-0.96611	0.79096	0.581485	-2.90365	-1.57157	0.339355	-1.5855	1.19795	-1.17793	-0.16981	-0.05031	NA	-1.81764	0.37781	0.25346	0.526725	-1.8101	-2.68837	-3.23504	NA	0.474045	0.06861	-1.52183	-0.089115
A2MG_HUMAN	SLNEEAVKK	-1.16	-0.027	-0.11	0.9162	0.01	0.9162	-1.62025	NA	NA	NA	-1.40061	-1.49662	-0.90049	-0.886455	-0.94086	-1.28752	NA	NA	NA	NA	-1.19531	NA	-1.23985	-0.66324	-1.09526	NA	-1.68128	-1.2234	NA	NA	NA	-1.20093	NA	NA	-1.18376	-1.18623	-0.79597	-0.761715	-1.47927	-1.31354	NA	NA	-0.637105	-1.22339	NA	NA
A2MG_HUMAN	ATVLNYLPK	1.54	-0.085	-0.47	0.64364	0.22	0.64364	1.59467	1.75645	0.67062	0.71087	1.47526	1.58229	0.92739	1.10264	1.36281	1.17377	1.10134	1.15573	1.36941	1.43018	1.56282	1.50512	2.49988	2.75418	1.91942	2.20956	1.72212	1.83882	1.59783	1.88309	1.4151	1.5646	0.75012	0.522235	1.33317	1.30405	1.49031	1.3641	1.86973	1.88845	1.71903	1.75636	1.60478	1.62587	2.03914	2.2807
A2MG_HUMAN	FEVQVTVPK	1.81	-0.278	-1.84	0.07323	3.38	0.07323	1.60463	1.89587	1.08504	1.16604	1.55013	1.5863	1.26053	1.1946	1.65258	1.58722	1.65985	1.92952	1.67376	1.66861	1.9488	1.76954	1.79187	2.18573	1.95687	2.28463	2.11266	2.22804	1.7867	2.03066	1.60911	1.86301	1.49983	1.57157	1.8352	1.77457	1.82514	1.90765	1.87917	2.11316	2.23529	2.18826	1.94142	1.81849	2.29321	2.49295
A2MG_HUMAN	GHFSISIPVK	1.52	-0.12	-0.73	0.46883	0.53	0.46883	2.1614	1.92589	1.63977	1.30685	1.43223	1.10758	1.32685	1.32093	1.56347	1.50106	1.18677	1.41708	1.47613	1.18105	1.40095	1.40281	1.42197	1.265	1.66814	1.51951	1.83952	1.81265	1.78264	1.88245	1.68714	1.366	1.71581	1.33367	1.58695	1.47157	2.0701	1.42997	1.58188	1.50682	1.17047	1.08371	1.20097	1.46636	1.82814	1.80306
A2MG_HUMAN	SSGSLLNNAIK	2.07	0.005	0.02	0.98162	0	0.98162	2.24627	2.50829	1.2076	1.75304	1.88467	2.12807	1.91371	2.11646	2.37169	2.0625	1.28991	1.61786	1.56345	1.99308	2.36913	2.11364	2.37124	3.00361	2.19318	2.70015	2.10698	2.49323	2.36233	2.81494	1.90474	2.17205	1.0548	1.4524	1.78692	1.9359	1.92775	2.23251	1.86733	2.23368	2.03036	2.18877	2.20212	1.91475	2.09997	2.51914
A2MG_HUMAN	QTVSWAVTPK	3.01	-0.092	-0.38	0.70656	0.14	0.70656	3.24935	3.20506	2.0435	1.90264	3.28127	3.33908	2.75393	3.09321	2.77797	2.53707	2.46563	2.5668	2.43262	2.75006	2.59679	2.92409	3.90646	4.28083	3.40241	3.8283	3.39738	3.61253	3.2053	3.57791	3.04677	3.31072	2.52421	2.33232	2.06874	2.21004	3.54664	3.71243	2.49974	3.16766	2.65642	2.4693	2.80965	3.04827	3.91006	4.06198
A2MG_HUMAN	SASNMAIVDVK	3.21	-0.067	-0.33	0.74403	0.11	0.74403	3.09005	3.40956	3.08864	3.49078	3.07992	3.20985	2.77637	2.96778	3.40776	3.18144	2.95859	3.1152	2.75267	2.93438	3.18106	3.05235	3.44226	3.92837	3.01986	3.5403	3.07497	3.42312	3.68935	4.10971	2.83205	3.33544	2.71392	3.35945	2.96072	3.14776	3.00269	3.28279	3.197	3.25457	3.04485	2.84562	3.45843	NA	3.21528	3.60369
A2MG_HUMAN	QGIPFFGQVR	2.99	-0.136	-0.97	0.33643	0.95	0.33643	3.10692	3.27215	2.58396	2.61007	2.78518	2.6611	2.56928	2.85213	3.11723	2.91622	2.94871	2.95902	3.03916	3.03505	2.93993	3.06411	2.92009	2.9951	2.92604	3.08551	3.16838	3.26646	3.0849	3.56205	3.0632	3.19365	2.83051	2.95481	2.90075	2.89041	3.32166	3.285	3.03939	3.19417	2.91257	2.77956	2.56184	2.90194	2.92043	3.26938
A2MG_HUMAN	LPPNVVEESAR	3.36	-0.065	-0.35	0.73155	0.12	0.73155	3.08228	3.40099	3.3466	3.43505	2.77222	3.24362	2.84414	2.43298	3.36281	3.39782	3.35898	3.55753	3.49169	3.28938	3.42685	3.35925	3.4954	3.75555	3.61626	3.84589	3.60577	3.31004	3.42285	3.35716	2.98539	3.55603	2.71571	2.75694	3.48586	3.47369	3.45535	3.67439	3.4885	3.16757	3.66414	3.70221	3.54562	2.94356	3.71513	3.78419
A2MG_HUMAN	YDVENCLANK	4.31	0.075	0.37	0.7102	0.14	0.7102	3.80234	3.85023	3.36518	3.5728	4.65774	4.49789	3.80077	3.57831	4.57556	4.35975	4.78747	5.0341	4.82692	4.80225	4.65994	4.57727	4.46873	4.36053	4.65121	4.82336	4.89037	4.73064	4.58811	4.25574	4.56739	4.62227	5.26077	5.122	3.46198	3.47729	4.96136	5.03273	3.54311	3.61808	3.69012	3.82995	3.80123	4.02206	4.01663	4.05448
A2MG_HUMAN	LSFYYLIMAK	-0.31	-0.482	-1.51	0.13803	2.29	0.13803	-0.35142	-0.46235	0.53186	0.44893	-1.14798	-1.76216	-0.72184	-0.824135	0.2951	0.20742	0.09542	-0.10351	0.08943	-0.48382	0.13446	-0.04113	-3.41161	NA	-0.847915	-0.9847	0.066965	-0.708635	0.08297	-0.12804	-0.59759	-1.14622	0.46668	0.530365	0.13106	-0.37877	0.2483	0.094665	0.24064	-0.160975	-0.13624	-0.6733	-0.126545	-0.08718	-0.34296	0.009475
A2MG_HUMAN	VGFYESDVMGR	3.28	-0.157	-1.15	0.25629	1.33	0.25629	3.41707	3.44443	3.03286	3.19257	2.81152	2.84677	2.89872	3.19774	3.45663	3.24568	3.02544	3.30261	3.15297	3.2227	3.22642	3.34803	3.09155	3.2242	3.26916	3.57801	3.46217	3.62478	3.50338	3.89853	3.30834	3.34979	3.22075	3.37053	3.27704	3.31671	3.58116	3.55545	3.10937	3.29415	3.01194	2.98338	3.13496	3.33704	3.30252	3.4832
A2MG_HUMAN	VTAAPQSVCALR	3.02	-0.27	-1.56	0.12728	2.42	0.12728	2.81281	3.06343	2.1847	2.2829	3.04254	2.99665	2.727	2.28837	2.82129	2.83239	2.68088	2.967	2.76995	2.98946	2.79989	2.82616	3.53796	3.69531	3.08772	3.28824	3.55368	3.49288	3.04366	3.07427	3.37261	3.49807	2.16606	2.13206	3.01393	3.10243	2.77278	3.19069	2.92587	3.11399	3.78752	3.81419	3.12092	3.12783	3.33961	3.45621
A2MG_HUMAN	NALFCLESAWK	1.33	-0.459	-2.33	0.02489	5.43	0.02489	1.18081	1.39631	1.01168	1.49239	0.76617	0.42019	0.99684	0.992965	1.22488	1.32786	1.39064	1.33289	1.44324	1.04659	1.7427	1.65745	0.30022	-0.25551	1.31292	1.22729	1.8211	1.54296	1.22826	1.45468	NA	1.33174	0.99368	1.11526	1.51223	1.64896	1.40619	1.55672	1.75795	1.78591	2.36365	2.19133	1.40911	1.61475	1.32419	1.75798
A2MG_HUMAN	KLSFYYLIMAK	-2.65	-0.285	-0.35	0.73329	0.12	0.73329	-2.74357	-1.63747	NA	NA	-3.43926	NA	NA	-2.63524	NA	NA	NA	NA	NA	NA	NA	-2.25708	NA	NA	NA	-4.11569	-3.48828	NA	-3.56388	-1.7629	NA	-2.67172	NA	NA	NA	NA	NA	NA	NA	NA	NA	NA	NA	NA	-2.18332	-1.36033
A2MG_HUMAN	NEDSLVFVQTDK	2.82	-0.053	-0.23	0.81914	0.05	0.81914	3.01527	3.16604	1.35297	1.78732	2.86661	3.05663	2.39027	2.58798	2.63778	2.51642	2.53635	2.83069	2.65208	3.00202	2.85051	2.80856	3.43337	3.88191	3.09118	3.47971	3.04987	3.34818	2.66497	3.20278	2.79699	3.08944	1.64149	2.01845	2.50584	2.50921	2.84953	2.95826	2.82934	3.13739	3.13217	3.21384	2.72815	2.45372	3.19784	3.67163
A2MG_HUMAN	MVSGFIPLKPTVK	3.77	-0.139	-1.11	0.27423	1.23	0.27423	3.95013	3.92927	3.90595	3.81225	3.1904	3.19302	3.5249	3.68257	3.98561	3.7616	3.67332	3.80748	3.52356	3.49121	3.56256	3.65741	3.72217	3.76902	3.77743	4.01364	3.98764	3.92914	4.03563	4.31915	3.58182	3.58301	4.13978	4.00882	3.93794	3.82692	3.89913	3.84271	3.69521	3.7418	3.50104	3.4378	3.56234	3.82495	3.85883	4.00742
A2MG_HUMAN	HYDGSYSTFGER	2.13	-0.062	-0.5	0.62026	0.25	0.62026	2.06664	2.08657	1.83014	2.04098	1.92906	1.8078	2.2054	2.00931	2.24776	2.02915	1.94679	1.97322	2.04507	2.01196	2.33015	2.22929	2.182	2.04873	2.41755	2.53791	2.16947	2.16204	2.68046	2.1413	1.93543	1.99133	2.14018	2.24274	1.98413	2.00438	2.30237	2.3021	2.17814	2.20146	1.94524	1.97164	2.18621	2.23021	2.18844	2.25253
A2MG_HUMAN	DMYSFLEDMGLK	3.28	-0.426	-1.94	0.05875	3.78	0.05875	3.35473	3.28823	3.65815	3.81602	2.27517	2.38852	2.81916	3.03767	3.55052	3.32147	3.52296	3.71413	3.42226	3.43996	3.46252	3.67049	1.38854	0.81798	3.15176	3.28526	3.16673	3.42607	3.37368	3.48469	3.40078	3.46983	3.58369	3.84794	3.42195	3.48825	3.65341	3.70126	3.62176	3.53333	3.26763	3.17807	3.24785	3.69179	3.5834	3.75597
A2MG_HUMAN	NQGNTWLTAFVLK	2.57	-0.221	-1.39	0.17098	1.94	0.17098	2.82511	3.02969	2.73345	2.84649	2.12691	2.04224	2.50022	2.5697	2.68175	2.64731	2.58185	2.56638	2.62888	2.4958	2.75212	2.75201	1.56233	1.11057	2.32742	2.32266	2.67912	2.4061	2.91905	3.04788	2.57971	2.54773	2.74605	2.8889	2.62223	2.5297	2.85998	2.73233	2.65211	2.63334	2.54771	2.32458	2.66208	2.70875	2.51049	2.93249
A2MG_HUMAN	AAQVTIQSSGTFSSK	-2.64	0.502	0.67	0.51397	0.45	0.51397	NA	NA	NA	NA	NA	NA	-3.73202	NA	NA	NA	-2.27832	NA	-1.13055	-3.20278	-1.37852	-1.793	NA	NA	-3.00042	NA	NA	NA	-2.65501	NA	-3.34559	NA	-2.61941	NA	NA	NA	-4.12302	NA	NA	NA	NA	NA	-2.40753	NA	NA	NA
A2MG_HUMAN	LVHVEEPHTETVR	1.88	-0.16	-0.97	0.33805	0.94	0.33805	1.94929	2.05094	0.84474	0.88866	1.50666	1.42751	2.12682	1.90335	1.59278	1.59639	1.70011	1.87226	1.86745	1.9138	1.75975	1.95956	2.32619	2.29191	2.2535	2.24856	2.29767	2.16975	1.82554	1.7278	2.14688	2.17227	1.02754	1.26473	1.66763	1.7405	2.02573	1.9828	1.91988	2.10437	2.50396	2.46965	1.66058	2.11615	2.38057	2.08286
A2MG_HUMAN	VTGEGCVYLQTSLK	-2.12	-0.098	-0.23	0.82234	0.05	0.82234	NA	-1.48911	NA	NA	-2.28506	-2.48904	-2.95958	-2.93342	NA	-1.53415	-2.38218	NA	-2.58219	-2.3886	-2.5005	-1.82322	-2.52583	-2.33347	-1.36441	-1.07265	-1.95128	-1.40861	-2.12912	-1.2841	-2.56648	-2.3298	-1.63008	-3.84708	-1.40412	NA	-2.32874	-2.48828	-1.95215	NA	NA	NA	NA	NA	-2.02579	-1.60451
A2MG_HUMAN	ALLAYAFALAGNQDK	2.41	-0.279	-1.75	0.08834	3.05	0.08834	2.8372	2.91399	2.37966	2.22264	2.1697	2.2999	1.84846	2.00978	2.37184	2.57009	2.17438	2.18955	2.55211	2.30183	2.64492	2.66224	1.47728	1.18614	2.38835	2.3111	2.6809	2.51571	2.7538	2.91024	2.8054	2.5587	2.21006	2.21582	2.51339	2.33882	2.71114	2.40347	2.72888	2.54447	2.68044	2.41186	2.16729	2.56758	2.64429	2.72593
A2MG_HUMAN	IAQWQSFQLEGGLK	2.05	-0.366	-2.29	0.02717	5.25	0.02717	2.01594	2.16127	1.18367	1.24817	1.71453	1.41137	1.71818	1.69739	1.63423	1.4679	2.13496	2.22312	2.24778	2.13552	2.21675	1.96873	1.75849	1.46858	2.60656	2.34649	2.44802	2.42406	1.80911	2.13168	2.1318	2.21387	1.60172	1.67647	1.89729	1.89849	2.31966	2.2984	2.41851	2.53375	2.68736	2.73924	2.00113	1.9924	2.76377	2.68752
A2MG_HUMAN	TEVSSNHVLIYLDK	3.15	-0.134	-0.89	0.37886	0.79	0.37886	3.12817	3.33957	2.98637	3.18422	2.69287	2.92455	3.01489	3.18246	3.57653	3.30332	2.9057	3.14228	2.88574	3.19027	3.00236	3.045	2.63268	2.98636	3.17929	3.40013	3.31329	3.42248	3.34264	3.68583	2.79308	3.13124	3.35971	3.49467	3.03825	3.0781	3.36256	3.45919	3.02607	3.29363	2.81152	2.8392	3.11441	3.12073	3.2393	3.45568
A2MG_HUMAN	DNSVHWERPQKPK	-0.47	0.05	0.18	0.85853	0.03	0.85853	0.16914	-0.99348	-0.87103	-1.0375	-0.83448	-1.1853	0.72113	0.256065	-0.37896	-0.71336	-0.65046	-0.42518	-0.48143	-1.02731	0.15121	-0.36036	-0.15575	-0.82317	0.052855	-0.3472	-0.405975	-0.727065	0.49868	0.13488	-0.18716	-0.92245	-0.15735	-0.075085	-1.01872	-1.2627	0.00518	-0.248925	-0.47335	-0.729365	-0.54697	-0.79158	-0.925485	-0.97113	-0.33003	-0.798005
A2MG_HUMAN	TEHPFTVEEFVLPK	3.76	-0.234	-1.31	0.19739	1.72	0.19739	3.8876	4.04892	2.75962	2.7833	3.50424	3.49556	3.21066	3.58801	3.45972	3.1839	3.80386	3.68406	3.78145	3.77305	3.67252	3.7688	4.05608	4.25932	3.90751	4.15037	4.18072	4.3323	3.49395	4.00532	3.93846	4.04878	2.95876	3.13509	3.63749	3.50054	3.92244	3.86641	3.96718	4.10572	4.38357	4.36588	3.48014	3.75777	4.04632	4.3361
A2MG_HUMAN	SSSNEEVMFLTVQVK	-0.51	0.402	0.71	0.48018	0.51	0.48018	1.48648	0.23007	-1.06712	-0.8604	0.82249	0.56762	-2.05581	-0.723815	0.1523	-0.13389	-0.68609	-0.28265	-0.62994	-0.89479	-0.98978	0.08254	0.37447	NA	-1.51441	-0.4701	-0.521185	-1.35235	-1.08081	0.1673	1.20266	-1.73395	-0.93127	-0.155455	-0.36036	-0.88961	-0.14044	-0.396965	-0.77216	-0.670005	-1.72045	NA	-1.73653	-0.74377	-1.14856	0.149975
A2MG_HUMAN	ALLAYAFALAGNQDKR	-2.01	-0.338	-0.75	0.4571	0.57	0.4571	-0.93274	-1.02405	NA	NA	-1.79341	-1.48683	-2.93152	-1.54161	-3.36175	NA	NA	NA	NA	-2.90471	-2.56187	-1.69627	NA	-2.67089	-3.54047	-2.46858	-1.94386	-1.59596	-1.11033	-0.71622	-1.72194	-0.9563	NA	NA	-3.25066	NA	-1.77704	-2.03628	NA	-2.72063	-2.36452	NA	NA	-2.86929	-1.15406	-1.25492
A2MG_HUMAN	DTVIKPLLVEPEGLEK	3.05	-0.117	-0.56	0.57589	0.32	0.57589	3.38313	3.57586	1.93305	1.9258	3.14258	3.25613	2.60305	3.00334	2.89613	2.50283	2.65378	2.65129	2.76026	2.86422	2.95389	3.08223	3.59911	3.89392	3.46929	3.76566	3.56691	3.65007	3.03919	3.36885	3.23783	3.36435	1.88639	2.04081	2.72546	2.89112	3.00302	3.01425	3.11812	3.30207	3.55355	3.53295	2.56928	2.89428	3.64233	3.85514
A2MG_HUMAN	LLIYAVLPTGDVIGDSAK	3.51	-0.321	-1.73	0.09036	3.01	0.09036	3.41612	3.554	3.84973	3.77947	2.73594	2.61705	3.07832	3.18065	3.95514	3.7794	3.59829	3.69214	3.69211	3.55258	3.58854	3.65451	2.28797	1.91884	3.5194	3.64193	3.65487	3.5154	3.63189	3.81972	3.0898	3.16831	4.04127	4.24367	3.86159	3.58651	3.78984	3.68817	3.9141	3.68424	3.34137	3.11635	3.52516	3.85122	3.82605	4.15513
A2MG_HUMAN	QFSFPLSSEPFQGSYK	1.66	-0.303	-1.58	0.12148	2.5	0.12148	1.77543	1.90175	0.51413	1.01739	1.2373	1.25434	1.12315	1.56334	1.33011	1.33172	1.58647	1.87386	1.60112	1.63596	1.6969	1.86325	1.52116	1.62176	1.63465	1.98763	2.01999	2.03605	1.24438	1.73948	1.84475	1.81105	0.76302	1.21144	1.56567	1.6664	1.66957	1.96443	1.954	2.13619	2.39993	2.49928	1.53974	1.74745	2.01183	2.30775
A2MG_HUMAN	VSVQLEASPAFLAVPVEK	2.72	-0.18	-1.14	0.26183	1.29	0.26183	2.75802	2.827	2.34749	2.43221	2.2501	2.15387	1.97063	2.20799	2.6545	2.72505	2.49609	2.757	2.72428	2.71668	2.82801	2.89744	2.76622	2.63667	3.0572	3.34577	2.80925	2.52131	2.52512	2.77382	2.31171	2.21608	2.36936	2.50358	2.85912	2.84172	2.63947	2.43194	3.31208	3.37988	3.1045	2.95227	2.71081	3.02054	3.38943	3.48672
A2MG_HUMAN	FSGQLNSHGCFYQQVK	0.03	-0.042	-0.17	0.86854	0.03	0.86854	0.25201	0.34832	-1.49845	NA	-0.09436	0.48082	0.21514	0.149595	-0.12738	-0.33992	-0.70241	-0.24701	-0.66401	-0.39493	0.14975	-0.24079	0.90083	0.91624	0.891865	0.70472	0.319285	0.377675	0.36177	0.50464	-0.00931	0.25696	-0.66672	-0.976345	-0.4314	-0.52668	-0.45203	0.067585	-0.34882	0.275355	0.43601	0.06743	0.113495	-0.34312	0.68448	0.587015
A2MG_HUMAN	KDTVIKPLLVEPEGLEK	0.93	-0.263	-1.26	0.21339	1.6	0.21339	1.23259	1.13563	-0.53232	-0.36855	0.52964	0.66629	0.74015	0.935925	0.67152	0.43004	0.52572	0.95252	0.45395	NA	0.9279	1.00236	1.51082	1.72443	1.1649	1.56626	1.43012	1.51972	0.8538	1.16445	1.04469	1.1657	0.12217	-0.030505	0.74221	0.60614	0.77255	0.948925	1.00319	1.13929	1.75023	1.73183	0.874665	0.94339	1.49596	1.76011
A2MG_HUMAN	AFQPFFVELTMPYSVIR	-0.71	-0.329	-0.75	0.45814	0.56	0.45814	-1.46303	-1.83322	0.34499	-0.32325	-2.57907	NA	-2.37419	-1.60254	-0.08919	-0.91558	-0.38531	-0.68863	0.01155	-0.74273	-0.34539	0.2715	NA	NA	-1.24083	-0.36768	-1.11048	-2.35088	-1.35412	-0.87275	-1.78417	-2.47251	-0.50333	0.198225	0.32233	-0.19725	-0.65622	-0.731075	-0.1435	-0.415965	-0.17811	-0.71277	-0.561315	0.26342	0.54289	0.830475
A2MG_HUMAN	LLLQQVSLPELPGEYSMK	2.95	-0.277	-1.52	0.13664	2.3	0.13664	3.15838	3.26151	3.33317	3.56334	2.14983	2.13272	2.38606	2.51231	3.22748	3.14899	2.81938	3.05487	2.85034	2.72105	3.27805	2.99303	1.81235	1.47344	3.11633	3.24225	3.04992	2.88631	3.27935	3.42943	2.7883	2.63964	2.94992	3.25025	3.20317	3.10337	2.94545	3.10046	3.3488	3.32877	3.08423	2.84305	2.88845	3.25878	3.02934	3.37295
A2MG_HUMAN	VDLSFSPSQSLPASHAHLR	3.79	-0.226	-1.59	0.11912	2.53	0.11912	4.0514	4.09228	3.12264	3.14321	3.25802	3.39199	3.55129	3.65354	3.63775	3.34201	3.69646	3.50183	3.54861	3.62664	3.77714	3.85297	4.00012	4.14342	3.99384	4.12695	4.16885	4.16402	3.6125	3.87934	3.82195	3.80883	3.60261	3.30382	3.70384	3.65706	3.84754	3.82893	3.79751	3.88557	4.47303	4.40238	3.88779	3.97599	3.98759	4.22513
A2MG_HUMAN	MCPQLQQYEMHGPEGLR	3.28	-0.189	-1.47	0.14833	2.17	0.14833	3.43774	3.33754	3.32262	3.48265	2.51035	2.37773	3.19026	3.27879	3.4534	3.29903	3.25511	3.19793	3.08386	3.06239	3.21763	3.28632	2.98205	2.85132	3.50131	3.63281	3.47567	3.44191	3.57527	3.72671	3.13977	3.01256	3.62705	3.54068	3.4481	3.44586	3.46571	3.46181	3.3396	3.29704	3.34501	3.13331	3.04958	3.11472	3.31392	3.59619
A2MG_HUMAN	YSDASDCHGEDSQAFCEK	-0.77	NA	NA	NA	NA	NA	NA	NA	NA	NA	NA	NA	NA	NA	-0.87308	-1.18809	NA	-1.36159	NA	NA	NA	NA	NA	0.32981	NA	NA	NA	NA	NA	NA	NA	NA	NA	NA	NA	NA	NA	NA	NA	NA	NA	NA	NA	NA	NA	NA
A2MG_HUMAN	LHTEAQIQEEGTVVELTGR	1.89	-0.1	-0.4	0.69119	0.16	0.69119	2.28161	2.15114	1.11803	0.75954	1.88808	2.0572	2.15077	1.49944	1.84615	1.6886	1.96113	1.46943	1.72611	1.76157	2.39609	1.65846	2.0952	2.01574	2.37663	1.91354	2.15788	2.02122	2.28043	2.00602	1.81011	2.00059	1.46463	0.782385	1.57805	1.50915	1.97927	1.77598	2.07908	1.92785	2.15573	2.06448	2.48969	1.52878	2.83867	2.36578
A2MG_HUMAN	HNVYINGITYTPVSSTNEK	3.3	0.017	0.11	0.91467	0.01	0.91467	3.57089	3.68832	2.88556	3.25135	3.14649	3.05925	3.5658	3.62426	3.49368	3.27614	3.18	3.55082	2.87209	3.15293	3.24559	3.17022	3.27264	3.3412	3.18136	3.61206	3.40244	3.62873	3.51128	3.71625	3.01497	3.12628	3.26667	3.58921	3.11735	3.18295	3.35388	3.55537	3.01518	3.27744	2.8368	2.90945	3.20378	3.18718	3.28502	3.62371
A2MG_HUMAN	KYSDASDCHGEDSQAFCEK	-0.33	0.14	0.38	0.70815	0.14	0.70815	NA	NA	NA	-1.74886	NA	NA	NA	0.243365	NA	NA	-1.08634	-0.4524	-0.78427	-0.64978	NA	-0.04785	NA	0.66461	0.224575	0.68127	NA	NA	NA	0.5727	NA	NA	NA	-0.831885	NA	-1.22217	-0.29857	-0.158385	NA	NA	-0.31734	-0.08221	NA	-0.77524	NA	-0.273135
A2MG_HUMAN	DLTGFPGPLNDQDDEDCINR	2.49	-0.043	-0.16	0.87303	0.03	0.87303	2.56672	3.10119	0.8809	1.56165	2.44811	2.46284	1.96011	2.61334	2.54837	2.10259	2.27799	2.45019	2.27249	2.52246	2.53263	2.76892	2.95818	3.34601	2.72614	3.24587	2.78717	3.04045	2.44007	3.03285	2.52586	2.77301	1.20645	1.64301	2.18782	2.31005	2.44514	2.58191	2.52345	3.00777	2.63232	2.7749	1.80913	2.41387	3.08119	2.98106
A2MG_HUMAN	EEFPFALGVQTLPQTCDEPK	-0.22	0.027	0.09	0.93079	0.01	0.93079	-0.6274	0.47412	-0.29941	0.19922	-0.60655	-0.58007	-0.25192	-0.007395	0.9366	1.05259	-0.19118	0.10512	-0.5823	-0.08723	-0.47335	0.12989	-0.84426	-1.37078	-0.953455	-0.34054	-0.606865	-1.08462	0.19442	0.21318	-0.73032	-0.60547	-0.73236	0.199655	-0.01531	0.21397	-0.11761	0.603935	-0.28815	-0.232265	NA	NA	NA	-0.53036	NA	-0.185555
A2MG_HUMAN	QQNAQGGFSSTQDTVVALHALSK	1.79	0.102	0.48	0.63545	0.23	0.63545	1.95163	2.32915	1.1042	1.11243	1.98113	2.22118	2.18815	2.10468	1.58879	1.71969	1.12927	1.51085	1.13392	1.76099	1.88772	1.70489	2.33044	2.55371	2.12545	2.38775	2.03139	2.19398	2.00553	2.48974	1.85412	2.0922	1.62792	1.53363	1.0693	1.10866	1.72043	2.21509	1.37577	1.74931	0.99733	1.08964	1.67348	1.56377	2.06233	2.34037
A2MG_HUMAN	ETTFNSLLCPSGGEVSEELSLK	1.76	-0.28	-1.18	0.24349	1.4	0.24349	1.28043	1.90726	1.57683	1.52905	1.29455	1.20968	1.36114	1.46521	1.80281	1.82216	1.77135	1.93552	1.99679	1.91722	1.81799	1.76977	1.21883	0.19277	2.26157	2.16701	2.10562	1.44212	1.86117	1.53987	1.3056	1.28623	1.67605	2.11628	1.97479	1.94662	1.53843	1.87428	2.26226	2.13347	2.03055	1.8013	1.89302	2.51211	2.09054	2.51532
A2MG_HUMAN	SLFTDLEAENDVLHCVAFAVPK	4.39	-0.547	-1.88	0.06718	3.53	0.06718	4.3072	4.49033	4.75769	4.73778	3.48086	3.74847	3.8264	4.13307	4.60734	4.45702	4.64958	4.90029	4.58688	4.55818	4.4421	4.58868	2.69819	1.27633	3.80266	4.26324	4.49136	4.30572	4.56866	4.72761	3.9702	4.32071	4.91305	5.18398	4.74153	5.00085	4.96117	4.793	4.53429	4.69144	4.71063	4.76561	4.44724	4.92455	4.28216	4.9127
A2MG_HUMAN	VVSMDENFHPLNELIPLVYIQDPK	3.63	-0.78	-1.73	0.09027	3.01	0.09027	3.64566	3.53702	3.43694	3.5018	2.73835	2.58839	2.90417	3.24816	3.72088	3.42287	3.93949	4.14142	3.86329	3.84485	3.90532	4.14114	1.64895	-1.40384	3.95274	4.07914	4.00347	3.94314	3.77967	3.78355	3.32064	3.68774	3.71175	3.86651	3.98455	3.94686	3.94922	3.95762	4.23462	4.18856	4.5589	4.36347	3.80347	4.25832	4.32422	4.7935
A2MG_HUMAN	AVDQSVLLMKPDAELSASSVYNLLPEK	2.2	-0.437	-2.35	0.02339	5.54	0.02339	2.45454	2.45294	1.54069	1.74891	1.20652	1.27868	1.6631	1.91914	2.20244	2.11329	2.11284	2.33372	1.97529	1.94029	2.4295	2.32601	1.56743	0.98804	2.75804	2.6794	2.68183	2.49619	2.20026	2.19738	2.32133	2.17512	1.5777	1.84325	2.24873	2.22155	2.30854	2.39296	2.73593	2.65	2.92491	2.7385	2.19116	2.4302	2.88423	3.20451
A2MG_HUMAN	YNILPEKEEFPFALGVQTLPQTCDEPK	2.47	-0.226	-1.2	0.23637	1.44	0.23637	2.70207	2.87629	2.56602	2.86247	1.82973	2.07981	1.98672	2.37577	2.85129	2.69995	2.18763	2.36255	2.23375	2.22043	2.59205	2.62813	1.44824	0.98555	2.70122	2.86849	2.44048	2.44368	2.85642	3.00424	2.07807	2.02198	2.85376	2.79741	2.49162	2.3729	2.52677	2.6516	2.87982	3.01619	2.31416	2.04632	2.41464	2.73189	2.59112	3.03593
A2MG_HUMAN	SPCYGYQWVSEEHEEAHHTAYLVFSPSK	-1.07	0.007	0.02	0.98781	0	0.98781	-0.57473	NA	-1.45554	NA	NA	NA	-0.90655	NA	NA	NA	NA	-1.68217	NA	NA	-0.53635	-1.22317	NA	NA	NA	-1.35456	NA	NA	-0.08573	-1.03447	NA	NA	-1.06856	-1.05114	-2.02906	NA	-0.79232	NA	NA	NA	NA	NA	NA	-1.80298	-0.22422	-1.23636
A2MG_HUMAN	AVDQSVLLMKPDAELSASSVYNLLPEKDLTGFPGPLNDQDDEDCINR	0.27	-0.732	-2.34	0.02448	5.46	0.02448	0.92066	0.18017	0.14853	-0.06118	-0.61959	-1.49983	-0.87445	-0.667965	0.15178	-0.29652	-0.19731	0.54062	0.57958	0.17277	0.31945	0.4434	-2.34878	NA	0.827185	1.1817	0.361025	0.351385	0.14607	0.745	-0.02781	-0.21574	0.10036	0.145375	0.83251	0.65132	0.96183	0.603555	0.38868	0.688965	0.80987	1.00293	0.386245	0.54218	1.54779	1.55184
A4_HUMAN	VEAMLNDR	1.09	0.444	2.22	0.03249	4.94	0.03249	0.96318	1.32545	1.86302	1.89124	1.32612	1.43481	1.08411	0.709955	1.43371	1.48288	NA	NA	0.05168	0.37051	1.64098	1.61661	1.47976	1.65799	1.43688	1.75023	0.753765	0.889875	0.14336	0.17799	0.57203	0.92862	NA	NA	1.06952	1.14345	0.46709	0.829105	0.88034	1.0498	1.31379	1.38427	NA	0.90184	1.11679	1.01816
A4_HUMAN	SQVMTHLR	0.02	0.665	2.28	0.02824	5.18	0.02824	0.93112	0.46054	0.95985	1.28286	0.14874	-0.04303	0.12166	-0.134015	0.57864	0.16628	-0.67343	0.06905	-1.19782	-0.56868	0.74787	1.06555	0.62768	0.4221	0.556795	0.71539	-0.309145	-0.061895	-1.47587	-0.8638	-0.39152	0.01155	-1.96815	NA	0.06464	0.03174	-1.1659	-0.912195	-0.09595	-0.353025	0.53695	0.53873	0.513005	0.58846	-0.26972	0.214955
A4_HUMAN	WDSDPSGTK	-0.41	0.673	2.31	0.02712	5.36	0.02712	-1.02723	-0.55693	0.03585	0.38592	-0.05589	-0.09407	NA	-0.429955	0.30243	-0.12759	-1.23125	-0.58801	NA	NA	0.39882	0.29755	0.12816	0.61069	NA	0.30263	NA	-0.659905	NA	-0.41917	NA	-1.2933	-2.45837	NA	-0.40446	-0.41453	-1.1248	-0.694535	-0.88853	-0.368995	-0.46004	-0.19093	0.340065	NA	-1.17149	-0.860115
A4_HUMAN	QQLVETHMAR	0.19	-0.03	-0.05	0.96091	0	0.96091	-0.23995	NA	0.58335	NA	NA	NA	NA	NA	NA	NA	NA	NA	NA	NA	NA	NA	NA	NA	NA	NA	NA	NA	NA	NA	NA	NA	NA	NA	0.09821	NA	NA	NA	NA	NA	0.30545	NA	NA	NA	NA	NA
A4_HUMAN	KAVIQHFQEK	-1.83	1.152	2.8	0.00935	7.86	0.00935	-1.25959	-1.07488	-0.70229	-0.65927	-2.00774	NA	-0.95023	NA	-1.17149	-1.4273	-2.73554	-1.88061	-3.1064	NA	-1.68184	-0.88965	-1.38843	-1.64328	-1.72551	-1.30235	-3.13721	NA	-3.61533	NA	-2.59074	NA	-4.39642	NA	NA	NA	NA	-2.44279	-2.11939	NA	-1.03898	-0.83261	NA	NA	NA	NA
A4_HUMAN	THPHFVIPYR	0.73	0.057	0.16	0.87724	0.02	0.87724	1.69234	1.37642	1.22464	1.14865	NA	NA	NA	1.22576	0.21731	0.04159	NA	0.45237	NA	NA	-0.00595	0.95439	NA	NA	-0.106705	0.78961	NA	NA	NA	NA	NA	0.31778	NA	NA	0.40872	0.29998	NA	NA	0.40821	0.043995	1.21619	0.96875	NA	1.13113	1.28981	0.927275
A4_HUMAN	LNMHMNVQNGK	-0.5	0.457	1.5	0.14037	2.26	0.14037	-0.09757	-0.29511	0.65474	0.77139	NA	-0.96912	-0.24755	-0.705715	-0.00641	0.10008	-0.60527	-1.01079	-0.69365	-0.91131	-0.1101	0.15909	0.04668	-0.48973	0.148705	-0.25195	-0.430505	-0.695235	-1.37582	-2.74785	-0.64113	-0.68298	-2.36894	-2.06385	-0.00127	-0.07334	-0.95954	-0.916305	-0.33828	-0.287895	NA	0.20523	-0.330975	-0.01083	-0.30181	-0.513315
A4_HUMAN	LVFFAEDVGSNK	2.22	-0.178	-0.25	0.81369	0.06	0.81369	NA	NA	NA	NA	NA	NA	NA	NA	NA	NA	NA	NA	NA	NA	NA	NA	NA	1.9985	NA	NA	NA	NA	NA	NA	2.6037	2.56725	NA	NA	NA	NA	NA	NA	NA	NA	NA	1.72819	NA	NA	NA	NA
A4_HUMAN	VESLEQEAANER	2.91	0.594	2.62	0.01219	6.87	0.01219	3.06247	3.67272	3.25206	3.54805	3.08414	3.31041	3.31993	2.7697	3.47013	3.30244	2.716	2.50743	3.23079	2.87998	3.27909	3.19664	3.37269	3.61284	3.10265	3.48299	2.57106	2.5715	1.78122	1.98042	2.47164	2.86283	0.98885	1.15572	2.86459	2.92063	2.5967	2.73509	2.58283	2.87468	3.08052	3.27117	3.37495	3.48956	2.88928	3.22791
A4_HUMAN	GLTTRPGSGLTNIK	2.19	0.522	2.07	0.04455	4.29	0.04455	2.21102	2.55314	3.04418	3.28504	2.28728	2.36493	2.56019	1.97066	2.62214	2.71784	1.83405	1.98558	2.00331	2.26581	2.49718	2.48599	2.70553	2.72304	2.26769	2.57626	2.26647	1.97081	1.45115	0.84325	1.98782	2.19309	0.22717	0.218185	2.45348	2.58702	1.11986	1.9384	2.27962	2.58643	2.80826	2.87687	2.42887	2.34044	1.96064	1.98789
A4_HUMAN	EVCSEQAETGPCR	-2.28	1.429	2.5	0.02727	6.26	0.02727	NA	NA	NA	NA	-2.0224	-2.05062	NA	-2.36971	-1.6272	NA	-3.67047	NA	NA	NA	NA	-2.01114	-1.48706	-0.88921	-1.93294	NA	NA	NA	NA	NA	NA	NA	NA	NA	NA	NA	NA	-3.74848	NA	NA	NA	NA	NA	-3.32207	NA	NA
A4_HUMAN	ISYGNDALMPSLTETK	1.69	0.51	2.03	0.04871	4.12	0.04871	2.36969	2.47505	2.58991	2.87891	1.61247	1.60256	1.69728	1.8786	2.40279	2.17363	1.03053	1.02585	0.80782	1.00324	2.08183	2.07202	1.92422	2.40478	2.15191	2.62172	1.54825	1.84841	0.42148	0.96848	1.45317	1.734	-0.46704	-0.120845	1.95796	2.0106	1.17275	1.32952	1.75384	1.88468	2.22383	2.21672	1.40352	1.44531	1.87417	1.94833
A4_HUMAN	CLVGEFVSDALLVPDK	2.02	0.209	1.02	0.31188	1.05	0.31188	2.61749	2.69591	2.9819	3.07315	1.69404	2.08716	1.5916	1.59513	2.52937	2.39576	1.9936	2.05197	1.63321	1.68258	2.48217	2.47222	1.28539	1.39652	2.11091	2.09075	1.88607	1.9318	1.05517	1.3748	1.78122	1.8872	0.79251	0.850075	2.1627	2.21895	1.54895	1.54679	2.36921	2.34218	2.72087	2.62792	2.11422	2.37081	2.10144	2.60766
A4_HUMAN	MDVCETHLHWHTVAK	2.63	0.355	0.8	0.42848	0.65	0.42848	3.31376	2.69784	NA	3.56373	2.50051	2.03805	3.2552	2.59635	NA	2.98006	NA	NA	2.48959	2.18312	NA	2.96894	2.96916	1.67568	3.14633	3.1165	2.86879	1.97589	2.25022	0.78931	2.77874	2.42945	NA	NA	NA	NA	2.23902	NA	2.72646	2.67254	NA	NA	NA	2.89962	3.31451	2.51557
A4_HUMAN	YLETPGDENEHAHFQK	0.76	0.764	2.91	0.00621	8.44	0.00621	1.62941	1.86782	1.32095	1.68256	0.9856	0.92419	1.12214	1.17301	1.34503	1.38796	-0.22255	-0.17808	-0.45787	0.08594	1.81506	1.72871	1.09813	1.04705	1.1303	1.39133	NA	0.316365	NA	NA	NA	-0.05244	NA	-1.39126	0.47697	0.37607	0.02521	0.494655	0.53333	0.803535	0.84811	0.93242	0.883875	0.89691	0.29238	0.383595
A4_HUMAN	STNLHDYGMLLPCGIDK	3.15	0.351	1.5	0.14111	2.25	0.14111	4.03822	3.96862	3.93459	4.02659	3.02907	3.19551	2.93513	2.94361	3.37737	2.74939	2.52693	3.34359	2.44808	2.37802	3.62059	3.61383	3.85501	4.04954	3.13861	3.29224	3.12231	3.20595	2.49574	2.78617	2.68853	2.67886	1.95395	2.43812	3.23504	2.98119	2.58555	2.7465	2.92974	3.13569	3.52321	3.55444	2.93884	3.49092	3.73369	3.21664
A4_HUMAN	EQNYSDDVLANMISEPR	1.5	0.826	2.65	0.01334	7.04	0.01334	NA	2.5138	1.54749	1.71037	1.73627	1.93311	NA	1.78855	2.07543	1.72357	0.38107	1.09943	NA	NA	NA	2.18013	2.05848	2.34308	NA	2.184	NA	NA	NA	0.58291	NA	NA	NA	-0.716405	1.42019	1.19089	1.14238	NA	1.39962	1.58634	1.10525	1.30609	NA	1.08606	NA	2.20469
A4_HUMAN	LALENYITALQAVPPRPR	2.39	0.357	1.59	0.12044	2.51	0.12044	3.20871	3.36324	3.2723	3.30706	2.47832	2.46877	2.58183	2.61218	2.97905	2.88803	2.17575	2.29696	1.72706	1.53252	2.92752	3.00752	1.70441	1.5458	2.57807	2.67573	2.42958	2.20194	1.06379	1.10869	2.35694	2.21157	0.75829	0.776195	2.73093	2.6794	2.07532	2.03885	2.59567	2.42524	3.26031	3.01412	2.49011	2.72116	2.55249	2.70457
A4_HUMAN	STNLHDYGMLLPCGIDKFR	0.15	0.085	0.25	0.80556	0.06	0.80556	0.22293	NA	1.1569	1.08025	-0.20188	NA	-0.26232	0.283235	0.253	0.18401	0.85272	NA	0.28309	-0.29259	-0.10806	0.64972	-0.86489	-1.30859	NA	NA	-0.070335	NA	-0.88316	NA	-0.59305	NA	NA	NA	0.16352	0.33393	NA	0.229955	0.08354	0.207675	0.97059	0.76445	-0.076735	0.98212	NA	NA
A4_HUMAN	EGILQYCQEVYPELQITNVVEANQPVTIQNWCK	1.46	-0.012	-0.02	0.98223	0	0.98223	1.75322	1.90716	2.90423	3.07584	0.81246	0.47867	1.00847	1.46779	2.43502	2.10838	1.94599	1.66027	1.54636	1.08998	2.10758	2.65312	-0.26143	-3.54528	1.93026	1.92599	1.20839	0.500885	0.59143	0.39941	0.37026	0.09494	1.14361	1.3938	2.18773	2.13813	1.06362	1.17965	2.21048	2.10658	2.10495	1.86071	1.30383	2.38988	2.05656	2.94324
AA2AR_HUMAN	VLAAHGSDGEQVSLR	-0.71	-0.182	-0.63	0.52969	0.4	0.52969	-1.768	-1.05161	-2.32688	-1.37878	NA	-0.68057	-0.31653	-0.601185	-1.52465	-1.52874	-0.39722	-0.00122	-0.85828	-0.42767	-1.02412	-1.1217	-0.05379	0.04602	-0.171165	-0.03636	-0.674845	-0.582955	-0.37097	-0.39828	-0.60795	-0.20068	-0.13503	0.643305	-0.71754	-0.73828	-0.13359	0.463325	-1.66559	-1.30309	-1.47268	-1.07808	-0.941895	-1.11044	-0.61558	-0.636055
AACT_HUMAN	ADLSGITGAR	2.05	-0.093	-0.29	0.7748	0.08	0.7748	1.47349	2.06468	0.75822	0.88675	2.56018	2.75386	1.56797	1.03849	0.58677	0.61941	1.75462	1.90419	1.51237	1.53153	1.66556	1.67287	5.0692	5.13964	2.67767	2.89728	2.40234	2.21692	2.60284	2.46775	2.58379	2.77855	1.18356	1.33031	2.22188	2.23329	1.47634	2.08187	1.98553	2.17388	2.32366	2.3472	1.60179	1.44052	2.20048	2.3422
AACT_HUMAN	EQLSLLDR	2.82	-0.081	-0.28	0.78107	0.08	0.78107	2.81287	3.0133	1.28797	1.55789	3.301	3.43851	2.31691	2.41914	1.56036	1.44678	2.50916	2.40156	2.09693	2.33041	2.60961	2.4749	5.44416	5.7165	3.21063	3.57028	3.01024	3.17797	3.3407	3.61655	3.25498	3.46571	2.31501	2.4215	2.76335	2.80184	2.51772	2.62643	2.69368	2.77689	2.93452	2.94307	2.31663	2.20565	2.80358	3.15875
AACT_HUMAN	KLINDYVK	0.07	0.321	0.79	0.43351	0.63	0.43351	-0.32016	-0.16848	NA	NA	0.33637	0.11139	-0.16054	-0.975705	NA	NA	-0.2265	NA	NA	-0.62605	NA	-0.56475	2.86034	2.64541	0.748935	0.652	0.550595	0.241455	0.50655	-0.29772	0.81007	0.80326	NA	-0.272165	0.3317	0.26902	-2.80659	-2.12935	-0.21406	-0.155635	0.54948	0.39221	-0.750155	-0.47333	0.46657	0.060825
AACT_HUMAN	EIGELYLPK	3.2	-0.093	-0.33	0.74019	0.11	0.74019	3.10778	3.29001	1.95708	2.31699	3.33305	3.4529	2.5987	2.78438	2.02993	1.83604	2.88614	3.29234	2.56182	2.74876	2.76701	2.84868	5.70993	6.01818	3.6433	3.91041	3.34895	3.56693	3.36568	3.80137	3.56114	3.77666	2.93448	2.77729	3.20434	3.25915	3.01092	3.12297	2.99731	3.26019	3.36425	3.43439	2.5332	2.66302	3.37089	3.60655
AACT_HUMAN	NLAVSQVVHK	1.6	-0.102	-0.33	0.74343	0.11	0.74343	1.23453	1.38543	0.40756	0.43814	2.01255	2.03479	1.35346	1.01093	-0.05735	-0.0286	1.33155	1.45559	0.8778	1.13427	1.27842	0.86851	4.63719	4.65042	2.47988	2.41715	1.93884	1.82105	2.22909	1.85265	2.19512	2.11726	1.10701	1.30848	1.64315	1.72026	1.27371	1.37525	1.31683	1.49385	2.0027	1.94349	0.791165	1.02802	1.91701	1.89128
AACT_HUMAN	WRDSLEFR	-1.38	-0.071	-0.19	0.85179	0.04	0.85179	-2.14361	-2.12466	NA	NA	-1.63072	-1.89481	NA	NA	NA	NA	NA	-1.59799	-3.07525	NA	NA	NA	0.57089	0.50845	-0.946445	-1.33834	-1.3157	-1.43457	-1.79986	-1.16754	-1.06389	-0.67353	NA	-2.22817	-1.56727	-1.68639	-1.83304	-1.66918	NA	NA	-0.81867	-0.92589	NA	NA	NA	-1.32319
AACT_HUMAN	ITLLSALVETR	0.87	-0.344	-1.29	0.20373	1.67	0.20373	0.59078	0.74521	-0.3694	-0.11134	1.16153	1.04389	-0.10951	-0.024875	-0.53408	-0.59348	0.67761	0.75017	0.34659	0.32609	0.42528	0.62243	3.13385	3.03258	1.39746	1.46974	1.60712	1.15499	1.30124	1.5183	1.45647	1.46176	0.55899	0.795595	1.18588	1.21522	0.33704	0.527695	1.22687	1.17258	1.28869	1.14688	0.000425	0.25425	1.18532	1.47243
AACT_HUMAN	MEEVEAMLLPETLK	0.03	-0.155	-0.39	0.69855	0.15	0.69855	0.25157	0.36949	-1.46629	-1.26475	0.10111	0.17804	-0.87944	-0.788675	NA	-2.59575	-0.36013	-0.22482	-1.04676	-1.15516	-0.33486	-0.14322	3.35115	3.21122	1.36791	1.49682	0.761135	0.591385	0.80584	0.86711	0.40352	0.37245	-0.84059	-0.535305	0.49353	0.54133	-0.82461	-0.681885	-0.03228	-0.061155	0.3639	0.01332	-1.74168	-1.19206	0.7749	0.928275
AACT_HUMAN	WEMPFDPQDTHQSR	0.6	-0.239	-0.76	0.45212	0.58	0.45212	0.26961	0.00683	-0.4569	-0.35491	0.19185	0.05429	NA	-0.027415	NA	-1.32738	0.57308	0.66185	-0.39835	-0.14988	0.11436	0.21306	3.50531	3.33667	1.40138	1.79918	0.940245	0.830175	0.92096	1.12659	0.96757	0.78098	0.30721	0.650805	0.70519	0.63102	0.17208	0.338905	0.73795	0.741925	1.06207	0.98455	-0.287985	-0.02043	0.71204	0.917185
AACT_HUMAN	MEEVEAMLLPETLKR	1.74	-0.252	-0.82	0.41533	0.68	0.41533	1.75539	1.54342	0.86419	1.08465	1.591	1.38795	0.84882	1.36286	0.09814	-0.04961	1.76586	1.72271	0.91733	0.94222	1.25938	1.45131	4.38737	4.29421	2.35267	2.73226	2.22185	2.1463	2.039	2.44622	2.21612	2.08592	1.60298	1.90922	2.19518	2.28348	1.11769	1.38735	1.70862	1.73028	2.27686	2.18061	0.562635	1.05456	1.85862	2.32525
AACT_HUMAN	LYGSEAFATDFQDSAAAK	1.37	0.037	0.14	0.88807	0.02	0.88807	1.36189	1.2988	NA	NA	1.55095	1.27671	1.02651	1.09682	0.16424	-0.22113	1.49916	1.28534	1.15073	1.02464	0.92191	0.75589	3.57191	3.56709	2.05703	1.69043	1.43029	1.51829	1.77761	1.53783	1.83715	1.80923	NA	NA	1.00995	1.04133	1.16676	1.21588	1.1776	1.01493	1.42732	1.58656	0.887125	0.95072	1.70986	1.31154
AACT_HUMAN	AVLDVFEEGTEASAATAVK	1.72	0.128	0.42	0.68002	0.17	0.68002	1.62633	1.29956	NA	NA	1.76845	1.73392	1.26037	0.874645	NA	NA	1.15243	1.26749	1.07973	1.18862	1.68948	0.83487	4.16969	4.24749	2.29361	1.83804	1.76422	1.87492	2.25516	1.70618	1.85148	1.89446	1.54678	1.43345	1.80733	1.88199	0.58173	0.623065	1.86161	1.66816	1.75375	2.01969	1.03321	NA	2.1421	2.00223
AACT_HUMAN	RLYGSEAFATDFQDSAAAK	0.37	-0.088	-0.26	0.79464	0.07	0.79464	-0.01769	NA	-1.38305	-1.21141	0.62953	0.59043	0.11047	NA	NA	NA	-0.0372	0.35358	-0.53082	NA	-0.07893	-0.56749	2.80308	2.79593	0.862155	1.0355	0.515325	NA	0.83854	1.56071	0.74066	1.01443	0.22812	-0.062915	0.26985	0.06974	-0.15104	-0.092675	-0.05693	-0.143375	0.63774	0.59973	-0.335865	NA	0.81748	NA
AACT_HUMAN	FNRPFLMIIVPTDTQNIFFMSK	-0.5	-0.67	-1.68	0.10108	2.83	0.10108	-1.60078	NA	0.37299	0.1255	-2.24508	NA	-2.48397	-2.0966	-1.71153	NA	0.40086	0.29306	-0.27206	-1.36694	-0.4609	-0.02661	NA	NA	-0.261225	-0.67137	-0.322385	-1.28178	-0.30099	-0.1434	-1.08322	-1.7278	0.9128	1.07395	0.84234	0.66987	-0.43305	-0.759865	-0.96359	-1.48856	0.27512	-0.17447	-1.01926	-0.19299	0.33164	0.205905
AATC_HUMAN	LALGDDSPALK	-2.47	-0.979	-2.25	0.03682	5.07	0.03682	NA	NA	-2.34615	-2.55169	-3.75859	-3.27848	NA	NA	-2.84456	NA	NA	NA	NA	-3.4302	NA	NA	NA	NA	NA	-3.35074	-1.58415	-1.07014	NA	NA	-3.43789	-2.841	NA	NA	-1.54982	-2.19771	NA	NA	NA	-2.43017	-1.0628	-1.35731	NA	-2.92449	NA	NA
AATC_HUMAN	VGGVQSLGGTGALR	-2.42	0.518	1.09	0.29608	1.18	0.29608	NA	NA	NA	NA	NA	-2.6584	NA	-2.7246	NA	NA	NA	NA	NA	NA	NA	NA	-1.70233	-1.07094	NA	NA	-2.24817	-1.93108	NA	-2.60263	NA	NA	NA	NA	-3.23593	NA	NA	NA	NA	-2.88822	-2.40495	-2.03043	NA	-3.56423	NA	NA
AATC_HUMAN	TDDCHPWVLPVVK	-0.48	NA	NA	NA	NA	NA	NA	NA	NA	NA	NA	NA	NA	NA	NA	NA	NA	NA	NA	NA	NA	NA	NA	NA	NA	NA	-0.642425	-0.447455	NA	NA	NA	NA	NA	NA	NA	NA	NA	NA	NA	NA	-0.4999	-0.31889	NA	NA	NA	NA
AATC_HUMAN	EPESILQVLSQMEK	-2.67	0.982	0.95	0.37815	0.9	0.37815	NA	NA	-2.17586	-1.64993	NA	NA	NA	NA	NA	NA	NA	NA	NA	NA	NA	NA	NA	NA	NA	NA	-4.06302	-3.56332	NA	NA	NA	NA	NA	-1.88821	NA	NA	NA	NA	NA	NA	NA	NA	NA	NA	NA	NA
AATC_HUMAN	NLDYVATSIHEAVTK	-1.34	-1.103	-1.48	0.15946	2.19	0.15946	NA	NA	NA	-1.42411	NA	NA	-2.89081	NA	-2.19461	NA	NA	NA	NA	NA	NA	NA	NA	NA	NA	NA	-0.933885	-0.663175	NA	NA	NA	-2.33445	NA	NA	-1.20085	-1.5914	NA	NA	-2.08051	-1.84109	-0.67667	-0.74915	NA	-2.36262	2.15466	NA
AATC_HUMAN	IVASTLSNPELFEEWTGNVK	-1.15	-1.522	-3.16	0.00676	9.98	0.00676	NA	NA	-1.38995	-1.03965	NA	NA	NA	NA	NA	NA	-2.91447	NA	NA	NA	NA	NA	NA	NA	NA	-2.95656	-0.697265	-0.515195	NA	NA	NA	-1.46569	NA	NA	-0.99565	-0.63324	NA	NA	-0.813	-1.2027	0.06974	-0.44695	NA	NA	NA	NA
AATC_HUMAN	IANDNSLNHEYLPILGLAEFR	-1.53	-1.666	-4.35	0.00047	18.93	0.00047	NA	NA	NA	NA	NA	-3.46811	NA	NA	-1.8906	NA	NA	-2.18041	NA	NA	-2.75604	NA	NA	NA	NA	-2.89074	-0.829865	-0.690925	NA	NA	NA	NA	NA	NA	-1.14531	-0.86586	NA	NA	-1.72557	-1.67663	-0.02344	-0.33882	-1.54574	-0.87348	NA	NA
ABCG2_HUMAN	QDKPLIEK	1.13	-0.259	-1.05	0.29936	1.1	0.29936	0.83455	1.19824	0.27889	0.24263	1.11713	1.26044	0.86754	0.993355	0.26794	0.20913	1.94628	1.97756	1.28287	1.15638	0.97532	1.19966	1.28607	1.09984	0.807585	0.97214	1.96473	1.89078	0.74985	1.03783	1.11863	0.81449	2.57825	2.66583	1.24835	1.2839	2.53501	2.22661	0.98366	0.927635	0.91336	0.52824	0.503105	0.9977	-0.14903	0.325175
ACBP_HUMAN	WDAWNELK	-1	0.331	1.49	0.14881	2.22	0.14881	-0.57755	NA	-0.6988	-0.87233	NA	NA	-0.82827	NA	-1.30444	NA	-1.23513	-1.3687	-0.98059	-0.94039	-0.92659	-0.42289	NA	NA	-0.825915	-0.37282	-1.25318	NA	-0.75201	NA	-1.46815	NA	NA	-2.00269	-1.29532	NA	NA	NA	NA	-0.605035	-1.56094	NA	-0.702785	-0.92171	-1.17557	NA
ACBP_HUMAN	TKPSDEEMLFIYGHYK	-0.98	-0.602	-1.53	0.15562	2.34	0.15562	-0.65425	-1.01014	NA	NA	NA	-1.32039	NA	-0.684475	NA	NA	NA	NA	NA	NA	NA	NA	NA	-1.80778	NA	-1.48953	NA	NA	NA	-0.59271	NA	NA	-0.24858	NA	NA	NA	NA	NA	NA	NA	NA	NA	NA	NA	NA	-1.01154
ACBP_HUMAN	QATVGDINTERPGMLDFTGK	0.99	0.205	0.8	0.42542	0.65	0.42542	1.53771	0.79093	0.60907	1.11329	1.1686	1.1391	1.69272	1.67812	0.81181	0.63934	0.86643	0.82244	0.53878	1.03154	0.96787	1.11312	1.13899	0.99189	1.30547	1.85109	1.42508	1.5091	1.41446	1.11604	1.25841	1.34461	0.15978	1.56234	0.57157	0.3564	0.48143	0.601225	0.69445	0.997625	0.4926	0.64851	0.735535	0.86491	0.92618	0.544495
ACTA_HUMAN	AGFAGDDAPR	-2.67	-0.299	-0.63	0.53851	0.39	0.53851	NA	NA	-3.3857	-2.98671	-1.94633	NA	NA	-2.39771	-2.44706	-3.29458	-3.14337	-2.33245	-4.02547	NA	NA	NA	NA	NA	NA	-2.89555	NA	-2.34637	-1.12331	-0.78839	NA	NA	NA	NA	NA	-2.94635	-1.97763	-1.67982	-3.49452	-3.39188	-4.03856	NA	NA	NA	NA	NA
ACTA_HUMAN	DLTDYLMK	-2.3	-0.198	-0.47	0.63936	0.23	0.63936	NA	NA	-1.81679	-2.10841	-2.75078	-2.90775	-3.11503	-2.65042	-2.06302	NA	-2.2452	NA	NA	NA	NA	NA	NA	NA	NA	-2.65769	-1.9105	-1.65555	-0.83969	-0.75389	-4.35997	-3.83312	NA	NA	-2.50356	-2.45177	-0.98788	-0.866045	-2.64895	-2.30964	-3.25844	NA	NA	NA	NA	NA
ACTA_HUMAN	EITALAPSTMK	-0.69	0.036	0.1	0.91725	0.01	0.91725	-1.43121	-1.15154	0.07171	0.24119	NA	-1.92906	-1.42231	-1.45921	-0.37654	-0.60487	-1.13383	-0.58625	-0.31566	-0.41538	NA	NA	-0.51295	-0.07599	-0.911505	-0.50052	-0.506435	-0.374325	0.14565	-1.23355	NA	-1.67087	-2.84214	NA	-0.12438	-0.48309	-0.01672	-0.038325	-0.48422	-0.284665	-0.23593	-0.4738	-0.186695	-0.18898	NA	-1.85919
ACTA_HUMAN	HQGVMVGMGQK	0.51	0.021	0.09	0.9276	0.01	0.9276	-0.82844	-0.24062	1.74584	1.1225	1.08831	1.06237	0.91504	0.871175	0.79911	0.42053	0.71668	1.20405	0.40814	0.63247	-0.27257	-0.39962	-0.14345	0.15611	0.487515	0.6758	0.532155	0.687265	0.34933	0.59148	0.18368	0.34725	0.66132	0.732005	0.66155	0.56599	0.5337	0.693485	0.66359	0.819875	0.32617	1.03244	0.351595	0.00053	0.08245	0.184195
ACTA_HUMAN	SYELPDGQVITIGNER	-0.95	-0.261	-0.8	0.43044	0.63	0.43044	-2.39226	-1.86336	-0.53743	-0.342	-0.87726	-0.80188	-0.48867	-0.382615	-0.32133	-0.54162	-0.67986	-0.20523	-1.385	-1.30915	-2.12427	NA	NA	-1.98154	-1.54329	-0.92223	-0.220245	0.115425	0.40509	0.73325	-1.74762	-1.24024	-1.27253	-1.0249	-0.86904	-0.7369	0.57732	0.784175	-1.28998	-1.33431	-1.06352	-0.85144	-3.13319	-2.69862	-1.3045	-1.07953
ACTA_HUMAN	YPIEHGIITNWDDMEK	-0.55	-1.037	-3.24	0.00448	10.48	0.00448	NA	NA	NA	NA	-1.88156	NA	NA	-1.01842	-0.47912	-0.68539	-0.63776	NA	-1.96248	NA	NA	NA	NA	NA	NA	-1.39353	-0.298425	-0.258945	0.25084	0.7128	NA	NA	NA	NA	NA	-0.48242	0.44683	0.558685	NA	-0.798695	-0.72267	-0.66358	NA	NA	NA	NA
ACTB_HUMAN	VAPEEHPVLLTEAPLNPK	-0.16	-0.365	-1.06	0.29316	1.13	0.29316	-1.55966	-1.3325	0.31223	0.60215	0.38943	0.37858	0.4015	0.702235	0.36555	0.27939	0.36719	-0.10961	-1.1003	-0.88039	-1.69917	-1.52295	-1.01946	-0.40525	-0.608875	-0.31212	0.974205	0.977175	1.58186	2.06585	-0.48394	-0.2527	-1.0553	-0.905965	0.23184	-0.18269	1.4926	1.66414	-0.38899	-0.258635	0.04609	-0.0811	-2.14404	-1.7777	-0.69192	-0.261585
ACTBM_HUMAN	IWHHTFYNELR	-1.9	-0.545	-0.51	0.62805	0.26	0.62805	NA	NA	NA	NA	NA	NA	NA	NA	NA	NA	NA	-2.30506	NA	NA	NA	NA	NA	NA	NA	NA	NA	NA	NA	-0.80784	NA	NA	NA	NA	-3.15713	NA	-1.31643	NA	NA	NA	NA	NA	NA	NA	NA	NA
ADA22_HUMAN	TDLMAVTLAQSLAHNIGIISDK	-3.23	-0.122	-0.22	0.8288	0.05	0.8288	NA	NA	-2.61506	-3.44147	NA	NA	NA	NA	NA	NA	-1.86479	-2.24087	-3.43641	NA	NA	-3.81733	NA	NA	-4.649	-3.89304	-3.46883	NA	NA	NA	NA	NA	-1.53633	-1.26879	-3.05596	NA	-2.80589	-3.06334	-3.66336	-4.01461	-4.46198	-5.3686	NA	-2.67105	NA	NA
ADA22_HUMAN	LFEFSLDDLPSEFQQVNITPSK	-1.9	0.511	1.03	0.3136	1.05	0.3136	NA	NA	-1.26733	-0.98816	NA	NA	-2.68314	-2.27294	-1.10298	NA	-1.54774	-1.36129	-1.56221	-1.69892	-2.05341	-1.29736	NA	NA	-2.34499	-1.95082	-3.39589	-4.45273	NA	NA	-3.41039	NA	-2.04258	-1.70686	-1.2682	-1.19762	NA	NA	NA	NA	-1.1871	-1.32048	-2.67135	-1.19589	-2.20315	-1.24477
AFAM_HUMAN	FTFEYSR	0.91	0.036	0.15	0.8845	0.02	0.8845	0.97665	1.09328	-0.58056	-0.53269	1.14757	1.09202	0.12253	0.282085	0.48857	0.35517	1.46052	1.30841	1.12651	1.15214	1.43361	1.52651	1.60319	1.58792	1.3295	1.55252	1.75277	1.80183	1.76242	2.04674	0.86851	0.80012	1.68885	1.78307	0.05294	-0.01204	1.62394	1.58675	0.73464	0.685655	0.10735	0.10053	-0.366945	-0.25463	0.41093	0.633135
AFAM_HUMAN	LCFFYNK	-0.61	0.26	0.87	0.39357	0.75	0.39357	-0.83242	-0.49913	NA	NA	-0.56044	-0.70986	NA	-1.60305	NA	NA	-0.36038	-0.15651	-0.91179	NA	-0.32907	-0.20301	-0.0072	0.36373	-0.431955	-0.08099	0.163105	0.203785	-0.08397	0.46534	NA	NA	0.07234	-0.452805	-1.8692	-1.9951	-0.18846	-0.233985	-0.92739	NA	-1.55465	-1.57148	-1.49503	NA	-1.50591	-1.08411
AFAM_HUMAN	GQCIINSNK	-1.16	0.396	0.58	0.57027	0.33	0.57027	NA	NA	NA	NA	-1.24579	-1.15553	NA	NA	NA	NA	NA	-0.988	NA	NA	NA	-1.39596	-0.64068	-0.07471	-1.22365	-0.66234	-1.68447	-1.28845	-0.66272	-0.36048	NA	NA	-1.25084	-3.50691	NA	NA	NA	-0.877525	NA	NA	NA	NA	-1.54446	NA	NA	NA
AFAM_HUMAN	RPCFESLK	-0.15	0.069	0.2	0.84477	0.04	0.84477	0.02359	-0.11993	-1.541	-2.89935	0.37095	0.0637	-0.47954	-0.765815	-1.00824	-0.89113	0.19654	-0.05678	-0.11934	-0.09336	0.81402	0.34637	1.24604	0.98839	0.836355	0.52948	1.01266	0.625685	0.97811	0.50883	0.03926	-0.11448	0.08396	0.137055	-0.95672	-1.65402	0.60639	0.425835	-0.32991	-0.401945	-1.02163	-1.43109	NA	-0.97625	-0.11954	-0.514165
AFAM_HUMAN	LPNNVLQEK	1.12	0.099	0.36	0.71952	0.13	0.71952	0.83398	1.25321	-0.23518	0.00661	1.6396	1.72443	0.49824	-0.194665	0.54635	0.66131	1.24326	1.55768	1.17677	1.44945	1.62737	1.52815	2.13656	2.4282	1.61319	1.90673	1.76798	1.72914	1.9553	1.73416	0.98609	1.34105	1.14247	1.41996	0.18714	0.38947	1.17521	2.02626	0.73145	1.10581	0.27484	0.38827	0.584465	0.44315	0.89237	1.14728
AFAM_HUMAN	DADPDTFFAK	1.54	0.039	0.14	0.89086	0.02	0.89086	1.7157	NA	0.28743	0.37577	NA	NA	0.61192	1.0838	1.15569	0.94902	1.94753	2.14084	1.61645	1.77832	1.83658	2.04166	2.73993	NA	2.03869	2.31934	2.33697	2.54805	2.24992	NA	1.41769	NA	2.09148	2.33901	0.73333	0.69775	2.24717	2.34632	1.21607	1.40719	0.62818	0.64654	0.661285	1.02622	NA	NA
AFAM_HUMAN	ICAMEGLPQK	1.1	0.082	0.29	0.77662	0.08	0.77662	0.77815	0.98441	NA	NA	1.21122	1.14682	0.29141	-0.245455	0.41121	NA	1.15202	1.29352	0.97555	1.04301	1.41447	1.40853	1.96173	1.65657	1.64192	1.96491	1.78462	1.23537	1.84765	1.1459	0.78248	0.98979	NA	0.999255	NA	0.19187	1.00986	1.60417	NA	0.943895	NA	NA	NA	NA	0.89552	0.407975
AFAM_HUMAN	TINPAVDHCCK	-1.07	0.314	0.95	0.35263	0.89	0.35263	-1.7039	NA	NA	NA	-1.18583	-1.48685	NA	NA	NA	NA	-1.17196	-0.46851	-1.302	-0.98719	-0.94776	NA	-0.26848	-0.01817	-0.554145	-0.37037	-0.841455	-0.606225	-0.56767	-0.57188	NA	NA	-0.21401	-0.470145	NA	NA	-0.6669	-0.669715	-1.75288	-1.57956	-2.39691	-2.2208	-2.61327	-2.2088	NA	NA
AFAM_HUMAN	FTDSENVCQER	0.11	0.264	0.72	0.47803	0.51	0.47803	-0.43111	-0.01562	NA	-1.41584	0.55092	0.58185	-0.60218	-0.339525	-0.26264	NA	0.02287	0.76651	-0.06095	0.22719	0.42693	0.24895	1.22349	1.72075	0.512255	1.00827	NA	0.859415	0.92626	1.35375	NA	NA	0.10092	0.945815	NA	-1.29079	0.41144	0.780935	NA	-0.114995	-1.29724	NA	-1.08679	-1.03848	-0.84482	-0.309345
AFAM_HUMAN	RHPDLSIPELLR	1.41	-0.05	-0.24	0.81368	0.06	0.81368	1.52288	1.52078	0.28776	0.27627	1.48316	1.37584	1.01284	1.13184	0.82417	0.60048	2.01946	1.962	1.44949	1.41724	1.81253	1.83419	1.71432	1.79225	1.72846	1.95929	2.17396	2.18582	2.08693	2.31223	1.34846	1.29775	2.35836	2.14114	0.5684	0.38313	2.12552	2.06376	1.16308	1.12643	0.77959	0.8057	0.898555	0.72485	1.10419	1.0698
AFAM_HUMAN	ESLLNHFLYEVAR	2.07	-0.429	-1.69	0.09918	2.85	0.09918	1.99452	2.35498	1.51352	1.40652	2.03495	2.06852	1.09504	1.12977	1.23685	1.20411	3.06294	3.04764	2.44372	2.12615	2.5646	2.41142	0.72515	0.37116	2.20784	2.07221	2.87877	2.75061	2.86774	2.95548	2.10325	1.99014	3.40634	3.41979	1.50817	1.33032	3.1434	2.81149	2.30465	1.88942	1.93468	1.5024	1.52628	1.77933	1.71639	1.82882
AFAM_HUMAN	AESPEVCFNEESPK	1.27	0.224	0.66	0.51399	0.44	0.51399	0.8172	1.05092	NA	NA	1.06823	NA	NA	NA	NA	NA	NA	NA	NA	NA	NA	1.04335	1.72748	2.29919	1.27117	1.58567	NA	1.55516	1.52411	1.96188	0.43807	NA	1.20076	1.50924	NA	NA	1.20347	1.50842	NA	0.414375	NA	NA	NA	NA	NA	0.595565
AFAM_HUMAN	IAPQLSTEELVSLGEK	2.37	0.037	0.15	0.88156	0.02	0.88156	2.33177	2.72944	1.00759	1.30883	2.49554	2.48022	1.55244	1.99067	1.9076	1.51681	2.8566	2.74458	2.43207	2.50205	2.59035	2.68604	3.18513	3.44896	2.82828	3.18729	3.08291	3.30816	3.00415	3.32346	2.23614	2.31877	2.89064	3.14326	1.37725	1.25519	2.91959	2.66597	2.18348	2.36572	1.61903	1.79841	1.34983	1.48292	2.26011	2.44979
AFAM_HUMAN	SDVGFLPPFPTLDPEEK	1.35	-0.033	-0.14	0.88987	0.02	0.88987	1.58933	1.67037	0.14828	0.42688	1.33213	1.39039	0.40066	0.649925	0.88764	0.76259	1.71508	2.10888	1.48296	1.59326	1.51158	1.58433	1.88228	1.94919	1.67969	1.99145	2.13157	2.09976	1.9153	2.24659	1.08349	1.30463	2.1279	2.38237	0.36002	0.36874	2.05361	2.00137	1.12159	1.24853	0.6528	0.68996	0.330545	0.80482	1.01073	1.49249
AFAM_HUMAN	KSDVGFLPPFPTLDPEEK	0.87	0.029	0.1	0.92196	0.01	0.92196	0.72098	1.34113	-0.89547	-0.20832	1.07552	1.18524	-0.23505	0.275295	0.14713	0.26845	1.4777	1.7507	1.01817	0.91858	1.11561	1.31205	1.97428	1.988	1.00242	1.50768	1.60438	1.59994	1.6375	1.90407	0.49436	0.3465	1.53413	1.92753	-0.07422	0.21699	1.25204	1.59523	0.83795	0.770385	0.3236	0.29555	-0.089335	-0.13813	0.28518	0.846085
AFAM_HUMAN	HELTDEELQSLFTNFANVVDK	2.27	-0.384	-1.07	0.29168	1.14	0.29168	2.47071	2.36925	1.70949	1.97768	1.62525	1.72197	1.54365	1.60013	2.03197	1.92579	3.0988	3.36805	2.51022	2.53399	2.92595	2.88073	1.04633	-1.1506	2.64927	2.72636	2.7205	2.71253	2.98868	2.78024	1.66507	2.07205	3.35101	3.58772	1.70705	1.85275	3.15388	3.05681	2.4456	2.38061	1.85872	1.99497	1.82628	2.26842	2.27604	2.53873
AFAM_HUMAN	RNPFVFAPTLLTVAVHFEEVAK	-0.66	-0.708	-1.5	0.14215	2.24	0.14215	-1.14703	-1.0904	-0.61592	-0.94759	-0.83203	-1.53896	-2.95241	-3.80299	-1.06765	-1.25173	0.88898	0.83868	-0.21294	-0.41231	0.63662	0.53522	-4.0868	NA	-0.618365	-0.42294	0.398245	0.209715	0.89397	0.266	-1.205	-2.36549	1.70199	1.53299	-0.93183	-1.18374	0.82553	0.505745	-0.92671	-1.80957	-0.94772	-1.27783	-0.987535	-0.58107	-0.79296	-0.827405
AFAM_HUMAN	LKHELTDEELQSLFTNFANVVDK	-1.36	-0.375	-1.06	0.29471	1.13	0.29471	-1.33884	-1.86101	NA	NA	-2.62668	-2.33322	NA	-2.04648	-1.8072	-1.91396	-0.58646	-0.74637	-0.50621	-1.19269	-1.60092	-1.18677	NA	NA	-1.76206	-2.32366	-0.779795	-1.17536	-0.38947	-0.64542	-0.96879	-0.77274	0.68378	0.650165	NA	-2.6497	-0.21286	-0.478575	-1.18871	-1.57838	-1.33718	-1.71112	-2.41567	-2.55134	-2.51395	-2.30807
AFAM_HUMAN	TYVPPPFSQDLFTFHADMCQSQNEELQR	-1.48	-0.614	-1.13	0.26738	1.27	0.26738	-1.63397	-0.91405	NA	-3.90427	-2.20528	-2.14619	-3.55663	-2.67466	NA	-3.15942	-0.485	-0.24304	-1.26621	-1.24181	-0.67725	-0.65127	-2.01008	-4.61885	-0.239965	-0.40884	-0.066985	-0.598215	-0.35074	-0.42492	-1.90831	-2.31456	0.45863	0.556675	-3.03583	NA	-0.45189	-0.427975	-1.33315	-1.14929	-2.52117	-2.47477	NA	-2.36765	-1.99794	-0.934995
AGRIN_HUMAN	SAGDVDTLAFDGR	0.17	0.122	0.3	0.772	0.09	0.772	NA	-0.1567	NA	NA	-0.09258	-0.07291	NA	0.341835	NA	NA	NA	NA	NA	NA	NA	NA	NA	0.94425	NA	0.19769	NA	NA	NA	-0.00719	NA	0.14911	NA	NA	NA	NA	NA	NA	NA	NA	NA	NA	NA	NA	-0.13368	0.558945
AGRIN_HUMAN	TEATQGLVLWSGK	-0.68	0.082	0.38	0.70494	0.15	0.70494	-1.25733	-1.33528	0.2034	0.56388	-0.94327	-1.25159	-0.54812	-0.303465	-0.34755	-0.63993	-1.12879	-0.81114	-0.92133	-0.68255	-0.64336	-0.52607	-0.38683	-0.3738	-1.15664	-0.48529	-1.03066	NA	NA	-0.59468	-0.72071	-0.68443	NA	NA	-0.80588	-0.93079	NA	NA	-1.18474	-0.805925	-0.50397	-0.49754	-0.825165	-0.64783	-0.59809	-0.259655
AGRIN_HUMAN	TFVEYLNAVTESEK	-1.27	0.333	0.9	0.37433	0.82	0.37433	-1.4415	-1.80531	-0.54964	0.42733	-1.35026	-1.46728	-1.44353	-0.906725	NA	NA	NA	-1.41423	NA	NA	-1.47298	-1.42478	-0.84473	-0.34702	-1.83744	-1.70789	-1.52185	-1.13786	-1.72176	-1.38946	-1.18957	-1.0769	-3.46053	NA	-1.02893	NA	NA	NA	-1.70297	NA	NA	NA	NA	NA	-0.56225	-0.549675
ALBU_HUMAN	YLYEIAR	0.35	-0.455	-1.07	0.29179	1.15	0.29179	-0.92343	-1.34449	-0.91664	-0.9789	1.67983	1.6595	0.93065	1.02788	1.00524	0.65515	-0.29207	-0.15164	0.16185	0.17787	0.61479	0.47891	NA	-1.2373	-0.102415	0.06192	0.671905	0.965775	3.72788	4.05162	0.79113	1.00027	NA	NA	0.09569	-0.27909	0.39746	0.279565	NA	NA	-0.50229	-0.69105	0.023805	0.10316	-1.23651	NA
ALBU_HUMAN	LCTVATLR	0.68	0.015	0.04	0.96577	0	0.96577	-1.07876	-0.65591	0.76565	-0.12413	2.28568	2.41949	1.68588	0.830755	1.36077	1.37512	0.3616	0.23109	0.7816	0.80185	1.10539	1.05212	-0.46609	-0.35985	0.544115	0.7435	1.27567	1.03138	1.83026	1.37187	1.476	1.6956	NA	NA	0.79635	0.70888	0.24041	0.908915	0.57952	-0.615665	0.13267	0.30847	0.569815	0.63574	-0.41326	-0.514675
ALBU_HUMAN	DDNPNLPR	-2.16	0.729	0.8	0.43444	0.64	0.43444	NA	NA	-6.35896	NA	0.73772	0.70884	NA	-0.017925	-0.37444	NA	NA	-2.66797	NA	-1.74422	-1.39444	NA	-3.03874	NA	-2.44609	-3.776	-2.15076	NA	-0.59744	NA	-1.75053	NA	NA	NA	NA	-4.03945	NA	NA	NA	NA	-4.83522	NA	-2.89052	NA	NA	NA
ALBU_HUMAN	DLGEENFK	-1.72	0.38	0.97	0.34847	0.94	0.34847	NA	-2.55792	NA	NA	-0.64221	-0.48919	-1.66266	-1.64559	-1.47558	NA	NA	NA	NA	NA	NA	-2.17849	NA	-1.47391	NA	NA	-2.38368	-2.12878	-1.2735	NA	NA	-1.74359	NA	NA	NA	NA	NA	NA	NA	NA	NA	NA	NA	-2.75935	NA	NA
ALBU_HUMAN	FQNALLVR	1.05	0.334	1.08	0.28726	1.16	0.28726	0.43692	0.50182	-0.0635	0.35417	2.71386	2.71694	1.96207	2.1179	1.93565	1.82802	0.67371	0.83229	1.25463	1.386	1.51094	1.52894	0.04613	0.58616	0.985125	1.10816	1.67824	1.82058	2.01027	2.34415	1.87459	2.05049	-1.24248	-1.45261	1.10643	1.06044	1.13444	1.24304	0.21956	0.280575	0.74454	0.36335	1.07635	0.92252	0.16395	0.347315
ALBU_HUMAN	QTALVELVK	-1	-0.16	-0.36	0.72056	0.13	0.72056	NA	-3.1719	NA	NA	0.78608	0.92566	-0.32877	0.027815	-0.68565	-1.08414	-1.57512	-1.66372	-2.13734	-1.83608	-0.84941	-0.69323	NA	NA	-1.82774	-1.18606	-0.476125	-0.189855	0.10358	0.57411	-0.01579	-0.06689	NA	NA	-1.8486	-1.78383	-1.13736	-1.24686	NA	NA	NA	NA	-1.15353	-1.67627	-2.67541	-2.02203
ALBU_HUMAN	LVAASQAALGL	-1.34	0.074	0.18	0.85651	0.03	0.85651	NA	NA	NA	NA	0.56952	0.27612	-0.63555	-0.843035	-1.14347	-1.32837	-1.72425	NA	-1.7778	-2.27471	-0.92266	-1.01232	-2.71717	-2.80647	NA	-1.98694	-0.582495	-1.05974	-0.14338	-0.21171	-0.34985	-0.46864	NA	NA	-1.90117	-2.20246	-1.57771	-1.87647	NA	NA	NA	NA	-2.27323	-2.94586	-2.36844	NA
ALBU_HUMAN	LDELRDEGK	-1.14	-0.014	-0.02	0.98423	0	0.98423	-1.82177	-2.13638	NA	NA	0.08411	-0.08658	-0.45862	NA	NA	NA	NA	NA	NA	-1.02752	NA	NA	-2.68508	-2.49952	NA	NA	-3.10767	NA	0.8507	0.79338	NA	NA	NA	NA	NA	NA	NA	NA	NA	NA	NA	NA	-1.32797	NA	-1.44133	NA
ALBU_HUMAN	KQTALVELVK	-0.91	-0.605	-1.21	0.23977	1.47	0.23977	NA	NA	NA	NA	0.51921	0.31115	-0.10899	0.046655	-1.63291	-1.53623	NA	NA	-2.38671	NA	-1.83297	-1.17813	NA	NA	-2.02121	-2.14373	-0.701175	-0.420075	0.00463	0.1637	-0.11922	NA	NA	NA	NA	NA	-1.48626	-1.82666	NA	NA	NA	NA	NA	NA	NA	NA
ALBU_HUMAN	CCTESLVNR	-0.87	-3.368	-4.38	0.00599	19.19	0.00599	NA	NA	NA	NA	NA	NA	NA	NA	-1.96307	NA	NA	NA	NA	NA	NA	-3.13894	NA	NA	NA	NA	NA	NA	0.74065	0.89401	NA	NA	NA	NA	NA	NA	NA	NA	NA	NA	NA	NA	NA	NA	NA	NA
ALBU_HUMAN	LVNEVTEFAK	1.85	0.038	0.15	0.88437	0.02	0.88437	0.95697	0.92183	1.05953	NA	3.15175	3.22433	2.56412	2.76375	2.47418	2.38804	1.42766	1.34673	1.87039	1.93139	2.12854	1.99411	0.82346	0.89058	1.60204	1.77545	2.3272	2.3863	2.58827	3.01344	2.3988	2.54002	NA	NA	1.74736	1.81961	1.8043	1.86414	0.76403	NA	1.41563	1.35372	1.64078	1.7688	0.67349	1.10235
ALBU_HUMAN	AVMDDFAAFVEK	0.87	0.394	0.93	0.35924	0.86	0.35924	-0.76932	-0.2865	-1.03486	-0.7574	2.58943	2.51089	2.03047	2.1261	1.66881	1.61179	0.80742	0.90834	1.01722	0.83793	1.55152	1.5865	NA	NA	0.825275	0.99236	1.97785	1.92097	2.2249	2.40363	2.07366	2.02554	NA	-2.23986	1.15159	1.23007	0.94193	1.0153	-1.30236	-1.40064	-0.11735	-0.2808	0.668535	0.90742	0.23925	0.654115
ALBU_HUMAN	ETYGEMADCCAK	-1.73	0.175	0.35	0.73026	0.12	0.73026	-3.58544	NA	NA	NA	0.15249	0.24272	-0.79865	-0.540975	-0.79838	-1.2595	-3.40678	-2.8021	-3.15163	-2.25829	-1.21164	-1.47674	NA	NA	-2.21672	-1.34116	-1.73864	-1.13088	-0.59347	-0.11488	-1.61022	-1.13201	NA	NA	-2.72844	-2.47671	-1.96766	-2.06365	NA	NA	NA	NA	NA	-2.88394	-2.42064	-3.13203
ALBU_HUMAN	YICENQDSISSK	0.87	-0.436	-0.72	0.48081	0.51	0.48081	NA	-1.22805	NA	NA	1.72929	1.84213	1.38616	1.3578	1.1915	0.97949	NA	0.29297	NA	NA	0.92879	0.45443	NA	-0.5455	0.081745	0.6221	0.261715	0.761685	3.3592	3.59619	0.55484	0.71301	NA	NA	NA	NA	NA	NA	NA	NA	NA	NA	NA	NA	NA	-1.01612
ALBU_HUMAN	RHPDYSVVLLLR	0.97	0.034	0.11	0.90935	0.01	0.90935	-0.01064	-0.4741	0.18296	0.09072	2.0254	1.86831	2.08312	1.95605	1.67703	1.39608	0.77813	0.64355	1.21659	0.91144	1.53143	1.46113	NA	NA	0.122395	0.26331	1.56021	1.32546	1.97408	2.00815	1.60609	1.41098	NA	NA	1.25169	0.96471	1.14149	0.982535	0.06142	-0.390525	0.80368	0.73937	1.25625	1.03874	-0.09198	-0.522495
ALBU_HUMAN	KVPQVSTPTLVEVSR	1.31	0.215	0.47	0.64321	0.22	0.64321	0.72281	1.19824	0.54894	0.45445	2.87807	2.90778	2.69392	2.90393	1.84912	1.88523	0.8347	0.18091	0.94663	1.47526	1.69408	1.74822	0.19091	0.4036	1.01049	1.4884	1.75375	2.04265	4.48651	4.82433	2.10778	2.30693	-1.10779	-2.19735	0.83466	0.39383	1.07208	1.45673	-0.47422	-0.049605	1.25172	1.1258	1.75086	1.25404	0.36612	NA
ALBU_HUMAN	RHPYFYAPELLFFAK	-0.02	-0.028	-0.05	0.96181	0	0.96181	-0.35171	-0.16989	NA	NA	0.99291	0.44041	0.92839	0.899715	1.45984	1.29931	0.13127	-1.70185	NA	NA	0.56036	1.10274	-2.99321	NA	-1.29222	-1.0541	0.273235	-0.022655	0.89953	1.15801	0.62474	0.69144	-0.74921	-1.0977	0.34016	-1.64274	0.38163	-1.18956	-1.35743	NA	NA	-0.26169	0.224965	NA	0.31538	0.372205
ALBU_HUMAN	RPCFSALEVDETYVPK	0.58	0.009	0.02	0.98528	0	0.98528	-1.53495	-1.51258	-1.36409	-0.9514	2.45746	2.36071	2.19427	2.43285	1.63927	1.47517	0.53983	0.92205	0.5131	0.77137	1.15545	1.4406	-1.5273	-1.20013	0.749325	1.03235	1.57929	1.76578	1.96031	2.40806	1.77581	1.89999	NA	NA	0.911	0.68973	0.94882	1.05161	-2.74306	-2.27116	-0.45846	-0.43474	0.518715	0.98505	-0.47376	0.162005
ALBU_HUMAN	VFDEFKPLVEEPQNLIK	2.82	0.128	0.45	0.65606	0.2	0.65606	2.03733	2.63644	2.17425	2.40888	4.12042	4.20495	3.55534	3.70171	3.66525	3.66551	2.68437	2.84227	3.05466	3.00407	3.2772	3.27064	1.1142	1.25005	2.39572	2.71597	3.36809	3.45542	3.68475	3.86671	3.62517	3.53057	0.94814	1.35725	3.01375	3.11886	2.90555	3.04299	2.15574	1.96033	2.78784	2.58207	2.70941	2.86805	1.8728	2.36402
ALBU_HUMAN	VHTECCHGDLLECADDR	0.23	0.982	2.49	0.02215	6.18	0.02215	NA	NA	NA	NA	1.31997	1.26107	1.34895	0.677235	0.51896	0.4701	NA	NA	NA	NA	0.09326	0.11495	NA	NA	NA	NA	0.348315	0.180685	0.76971	0.05331	0.22897	0.42794	NA	NA	-1.01485	-0.88772	-0.96227	NA	NA	NA	NA	NA	NA	-0.73434	NA	NA
ALBU_HUMAN	EFNAETFTFHADICTLSEK	-2.14	-1.305	-0.53	0.61248	0.28	0.61248	NA	NA	NA	NA	-1.17662	-3.39626	-1.53975	-3.47179	NA	NA	NA	NA	NA	NA	NA	NA	NA	NA	NA	NA	NA	NA	-1.09153	NA	NA	NA	NA	NA	NA	NA	NA	NA	NA	NA	NA	NA	NA	NA	NA	NA
ALBU_HUMAN	ALVLIAFAQYLQQCPFEDHVK	-0.24	0.52	1.28	0.20925	1.64	0.20925	NA	-2.10672	-0.30088	-0.38349	0.78087	0.64621	0.39433	0.518045	0.75114	0.57055	-0.55003	-0.48448	-0.28485	-0.17205	0.40214	0.59587	NA	NA	NA	NA	0.135225	0.346325	0.32392	0.78637	0.21544	0.0907	NA	NA	0.05083	-0.21518	-0.29231	-0.077425	NA	-3.37281	-1.0341	-0.97245	-0.806955	0.14202	-1.9393	-1.40644
ALBU_HUMAN	MPCAEDYLSVVLNQLCVLHEK	-1.83	-0.072	-0.19	0.84707	0.04	0.84707	NA	NA	-2.74615	-2.98392	-1.5401	-2.11146	-1.63228	-0.932365	-0.71149	-1.25383	-1.90038	-1.58488	-2.1192	-2.37869	-1.54348	-1.07443	NA	NA	NA	-2.88294	-1.24421	-1.6866	-1.28136	-0.90983	-1.60793	-1.68493	NA	NA	-1.57172	-1.4145	-1.82731	-2.06329	NA	NA	-3.43211	-3.80644	NA	-1.3658	NA	NA
ALBU_HUMAN	LVRPEVDVMCTAFHDNEETFLK	1.51	-0.27	-0.73	0.47002	0.53	0.47002	NA	-0.26886	0.11143	0.29277	2.7766	2.70515	2.51873	2.69665	2.33914	2.28005	1.43391	1.38868	1.30661	1.25297	1.76715	2.18209	-1.24114	NA	1.29056	0.87035	2.38377	2.16426	2.4162	2.56166	2.41359	2.22221	NA	NA	1.74832	1.69719	1.47865	1.63577	NA	-0.052575	1.11529	1.1105	1.21592	1.50382	0.54015	0.888485
ALBU_HUMAN	RMPCAEDYLSVVLNQLCVLHEK	0.23	0.288	0.62	0.54144	0.38	0.54144	-2.65397	-2.99101	-0.31909	-0.14169	1.05525	0.62045	1.63721	1.53046	1.55102	1.15792	0.766	0.9572	0.33999	0.32345	1.33114	1.57728	NA	NA	0.056115	0.08529	1.14243	1.13094	2.01898	1.55287	0.85907	0.85085	-3.36978	-2.9464	1.12395	1.08219	0.65404	0.736075	-1.74022	-1.83193	0.04842	0.05997	0.480505	1.09583	-0.36818	-0.700845
ALBU_HUMAN	LVRPEVDVMCTAFHDNEETFLKK	-1.7	0.372	0.69	0.52151	0.47	0.52151	NA	NA	NA	NA	-1.33505	NA	-1.68931	NA	NA	NA	NA	NA	NA	NA	NA	NA	NA	NA	NA	NA	NA	NA	-1.77261	NA	-1.9948	NA	NA	NA	NA	NA	NA	NA	NA	NA	NA	NA	NA	NA	NA	NA
ALBU_HUMAN	SHCIAEVENDEMPADLPSLAADFVESK	0.4	-0.113	-0.2	0.84078	0.04	0.84078	-1.10945	-1.386	-0.11922	0.0785	1.53652	1.59723	1.89628	1.97995	1.89051	1.70394	0.83263	1.01381	0.89977	0.65302	1.3993	1.40946	-3.82161	-5.52502	0.999805	0.8573	1.54688	1.24375	2.03503	2.00802	1.61177	1.61864	-2.81568	-2.16389	1.11987	1.08621	1.10497	0.906755	-1.2027	-1.03924	0.40415	0.0385	0.714975	0.97366	-0.21068	0.071085
ALDOA_HUMAN	QLLLTADDR	-2.39	-0.17	-0.36	0.73029	0.13	0.73029	NA	NA	NA	-2.74042	NA	NA	NA	NA	NA	NA	NA	-2.60967	NA	NA	NA	-2.07961	NA	NA	NA	NA	NA	-1.80766	NA	NA	NA	NA	NA	NA	NA	-2.11425	NA	NA	NA	NA	NA	NA	NA	-2.99719	NA	NA
ALDOA_HUMAN	KELSDIAHR	-4.55	NA	NA	NA	NA	NA	NA	NA	NA	NA	NA	NA	NA	NA	NA	NA	NA	NA	NA	NA	NA	NA	NA	NA	NA	NA	NA	NA	NA	NA	NA	NA	NA	-3.0151	NA	NA	NA	NA	NA	NA	NA	-6.09427	NA	NA	NA	NA
ALDOA_HUMAN	GILAADESTGSIAK	-0.76	0.526	0.6	0.57518	0.37	0.57518	NA	NA	NA	NA	NA	NA	NA	NA	NA	NA	NA	NA	NA	NA	NA	NA	NA	0.01062	NA	-1.18543	NA	NA	NA	NA	NA	NA	NA	NA	NA	NA	NA	NA	NA	NA	NA	NA	-1.11309	NA	NA	NA
ALDOA_HUMAN	FSHEEIAMATVTALR	-1.58	-0.181	-0.53	0.59967	0.28	0.59967	NA	-2.50751	NA	NA	NA	NA	-1.30908	-1.29737	-2.18142	NA	NA	NA	-1.66412	-2.14737	-0.78485	NA	-1.44763	-1.94296	-1.59327	NA	-1.52825	-1.57147	NA	NA	NA	-1.6802	NA	NA	-0.56741	-0.84748	NA	NA	NA	-1.28241	NA	NA	NA	-1.26958	NA	-2.74681
ALDOA_HUMAN	IGEHTPSALAIMENANVLAR	-0.1	0.017	0.07	0.94835	0	0.94835	-0.00976	-0.52214	-0.38743	0.1791	-0.45452	-0.44988	-0.94659	-0.585175	0.47654	0.464	-0.65014	0.03603	0.13024	-0.18661	0.54215	0.75311	-0.43726	0.01261	0.036635	0.15122	0.709405	0.776495	-0.43226	-0.35072	-0.43737	-0.51957	NA	NA	0.95161	0.76401	-0.99119	-1.09343	0.36619	0.725775	-0.57389	-0.72406	-0.371405	0.24933	-0.41769	-0.595305
ALDOA_HUMAN	GVVPLAGTNGETTTQGLDGLSER	-0.72	0.289	0.71	0.48884	0.5	0.48884	NA	NA	NA	NA	-0.95242	-1.19203	NA	NA	NA	NA	NA	-0.82892	-0.05841	NA	-1.08351	-0.54469	-0.42809	-0.20382	NA	-0.45703	NA	-0.581575	-1.2361	-0.54479	NA	NA	NA	NA	NA	NA	NA	NA	NA	-1.18768	NA	NA	NA	NA	NA	NA
ALDOC_HUMAN	KELSDIALR	-3.04	0.252	0.45	0.66911	0.2	0.66911	NA	NA	NA	NA	NA	NA	NA	NA	NA	NA	NA	NA	NA	NA	NA	-2.62755	NA	NA	NA	-3.19305	NA	NA	NA	NA	NA	NA	NA	NA	NA	NA	NA	NA	NA	-3.07483	NA	NA	-3.24885	NA	NA	NA
ALDOC_HUMAN	ALQASALNAWR	-2.26	-0.772	-1.07	0.31423	1.15	0.31423	NA	-2.34237	NA	NA	-2.11464	-2.39927	NA	NA	NA	NA	NA	NA	NA	NA	NA	NA	NA	NA	-3.28938	-2.26429	NA	-2.16655	NA	-1.21378	NA	NA	NA	NA	NA	NA	NA	NA	NA	NA	NA	NA	NA	NA	NA	NA
ALDOC_HUMAN	DNAGAATEEFIK	-1.46	-0.691	-1.31	0.2362	1.71	0.2362	-2.10392	NA	NA	NA	-1.7386	NA	NA	NA	NA	NA	NA	NA	NA	NA	NA	NA	NA	NA	NA	NA	-1.53822	NA	NA	NA	NA	NA	NA	NA	NA	NA	NA	NA	-1.03388	-0.862785	NA	NA	NA	NA	NA	NA
ALDOC_HUMAN	GILAADESVGSMAK	-1.44	0.242	0.72	0.47612	0.53	0.47612	-1.0581	NA	-1.73083	NA	-1.18888	-1.05371	NA	NA	-2.15239	NA	-1.63929	NA	-2.07972	-1.36373	-0.62992	-0.28979	-1.1875	-0.99472	-1.51014	NA	NA	-0.372635	-1.55274	NA	-2.54155	NA	NA	NA	NA	NA	-2.64856	NA	-0.7355	NA	-1.90566	-2.09139	-1.43945	NA	NA	NA
ALDOC_HUMAN	TPSALAILENANVLAR	-1.01	-0.433	-1.36	0.18393	1.85	0.18393	-1.31891	-1.11739	NA	-0.60799	-1.41876	-1.0002	-2.39231	NA	-0.93859	-0.99319	-1.36824	NA	-0.93127	-0.84275	-0.3238	-0.10592	-2.29305	-2.67586	-1.1782	-0.94595	-0.853655	-1.03605	-1.52069	-1.3001	NA	NA	NA	NA	0.07308	0.15047	-2.23189	NA	0.21968	0.158605	NA	-1.22829	NA	-0.21488	NA	NA
ALDOC_HUMAN	YTPEEIAMATVTALR	-2.45	0.196	0.45	0.65604	0.2	0.65604	-2.47696	-2.28409	-2.34931	-2.55239	-3.4515	-3.18625	NA	NA	-2.38479	-2.74078	-2.35653	-2.3336	-1.68034	-2.04055	NA	-1.11493	NA	NA	NA	-2.56174	-1.48298	-1.71446	NA	-2.92642	-3.72406	-3.31737	-3.97029	-5.13105	-0.94007	-1.4964	NA	NA	-0.99044	-1.24562	-2.90907	-3.57903	-2.39046	-1.82253	NA	NA
ALS_HUMAN	LAYLQPALFSGLAELR	-2.77	NA	NA	NA	NA	NA	NA	NA	NA	NA	NA	NA	NA	NA	NA	NA	NA	NA	NA	NA	NA	NA	NA	NA	NA	NA	NA	NA	NA	NA	NA	NA	-3.21464	-2.32858	NA	NA	NA	NA	NA	NA	NA	NA	NA	NA	NA	NA
AMBP_HUMAN	ETLLQDFR	2.24	-0.504	-2.61	0.01266	6.79	0.01266	2.09936	2.2932	1.87587	1.93456	2.1844	2.25721	2.31465	2.51716	1.22895	1.24424	2.00978	1.91032	2.03578	2.19014	1.54487	1.57862	2.41196	2.67186	1.5372	1.92478	1.8821	1.97948	2.43367	2.79108	3.08457	3.18049	3.16399	3.16222	2.37979	2.38289	2.71365	2.80389	1.37673	1.59336	1.70146	1.80501	2.57456	2.56418	2.98342	3.29426
AMBP_HUMAN	TVAACNLPIVR	3.07	-0.23	-1.26	0.21595	1.58	0.21595	2.68016	2.86352	2.33054	2.55624	3.24188	3.30965	2.83087	3.0327	2.74991	2.6025	2.89181	2.97256	3.00673	3.23806	2.86426	2.88877	3.24902	3.6337	2.92846	3.28103	3.38246	3.56738	3.37293	3.78032	3.6388	3.76949	3.86003	3.9809	2.56536	2.68452	3.46652	3.55552	2.34804	2.60166	2.58854	2.60598	2.9907	2.83534	2.9301	3.23109
AMBP_HUMAN	GVCEETSGAYEK	-1.18	0.415	0.61	0.55204	0.37	0.55204	0.2294	-0.19368	NA	NA	-1.84994	-2.15248	NA	NA	NA	NA	NA	NA	NA	NA	NA	NA	NA	-1.32634	NA	NA	NA	NA	NA	-1.45766	NA	NA	-1.63054	-1.26296	NA	NA	NA	NA	NA	NA	NA	NA	-3.2378	NA	-0.10442	0.006455
AMBP_HUMAN	AFIQLWAFDAVK	1.48	-0.858	-2.57	0.01395	6.59	0.01395	1.20441	0.9402	1.31563	1.07316	1.13799	0.54832	1.03381	1.27516	1.44524	1.26064	1.94543	1.94077	2.14721	1.93248	1.82905	1.87941	-1.23237	-2.55082	0.809605	1.11247	2.06278	1.77144	1.85774	2.14975	2.44904	2.23102	2.89062	2.97871	1.62676	1.41863	2.34648	2.27967	1.33109	1.32679	1.53457	1.05913	1.46565	1.69924	1.70973	2.01389
AMBP_HUMAN	CVLFPYGGCQGNGNK	-0.43	-0.369	-1.63	0.11159	2.65	0.11159	-1.02699	-0.77882	-1.30167	-1.43739	-0.68264	-0.91286	-0.77042	NA	-0.79258	-0.99145	-0.57979	0.01942	-0.48917	-0.2142	-0.36313	-0.51081	-0.45736	-0.30366	-0.298315	0.23722	-0.140455	0.101415	-0.0934	0.38041	0.21394	0.36011	1.01922	0.722055	-0.6245	-0.74069	0.1444	0.185955	-1.24201	-0.859815	-0.98107	-1.03387	-0.661545	-0.58117	-0.68234	-0.499255
AMBP_HUMAN	EYCGVPGDGDEELLR	1.48	-0.204	-0.93	0.35545	0.87	0.35545	1.0866	1.40009	0.5047	0.78254	1.60998	1.64446	1.14949	1.43775	1.23704	1.1155	1.31116	1.51415	1.41931	1.68005	1.33245	1.36297	1.64427	1.99804	1.44389	1.84506	1.68392	2.02602	1.89732	2.28588	2.12147	2.36124	2.22682	2.50042	0.75125	0.94388	2.12792	2.17781	0.65499	0.913455	0.64254	0.82345	1.01354	1.10332	1.45868	1.89535
AMBP_HUMAN	GECVPGEQEPEPILIPR	2.19	-0.365	-1.47	0.14788	2.17	0.14788	2.17143	2.31531	1.96829	2.24044	2.00494	2.16707	2.44134	2.74553	1.30988	1.22948	1.80344	1.88468	1.63602	2.33951	1.33283	1.63319	2.40716	2.67392	1.70426	2.2161	1.78243	2.05441	2.39257	2.86583	3.00214	3.11612	3.07279	2.96744	1.91849	2.0126	2.38117	2.72363	0.93018	1.52452	1.6893	1.66711	2.24334	2.54611	3.12666	3.5107
AMBP_HUMAN	VVAQGVGIPEDSIFTMADR	1.87	-0.561	-2.61	0.01243	6.83	0.01243	1.20727	1.83266	1.69144	2.0314	1.23111	1.38817	1.79026	2.04489	0.72251	1.39079	1.90744	1.9644	1.83964	1.66343	1.27526	1.60596	1.62721	1.5582	1.39996	1.64942	1.81661	1.69308	1.69904	1.93608	2.64339	2.495	2.95564	3.23713	2.1278	2.19962	2.22482	2.42117	1.39193	1.5216	1.92035	1.38205	1.95688	2.15465	2.45012	2.81908
AMBP_HUMAN	KEDSCQLGYSAGPCMGMTSR	0.96	-0.263	-1.14	0.25961	1.31	0.25961	0.80391	0.5366	0.24834	0.76038	0.63975	0.6325	1.0687	1.17558	0.68477	0.1719	0.83031	1.09111	0.55399	0.6619	0.76677	0.83558	1.12898	1.07194	1.19127	1.67554	1.32479	1.40128	1.65563	2.02681	1.47027	1.77006	2.08771	2.44684	0.30855	0.38208	1.18027	1.297	0.16433	0.169285	0.28015	0.21608	0.626835	0.36547	1.17636	1.43256
AMD_HUMAN	EGPVLILGR	0.67	0.074	0.4	0.68915	0.16	0.68915	0.6178	0.60825	1.21561	1.15383	0.67436	0.55601	0.3025	0.455385	0.67209	0.41794	0.61033	0.23532	0.64116	0.66936	0.67681	0.61042	1.18701	1.34161	0.722355	0.74309	0.892445	0.729675	0.23781	0.46469	0.41295	0.47957	-0.3525	-0.871295	1.08413	0.91766	0.26799	0.152205	1.20727	1.14902	1.32146	1.22504	1.12655	1.05593	0.5217	0.618065
AMD_HUMAN	IVQFSPSGK	-0.01	0.169	0.78	0.43751	0.61	0.43751	-0.81918	-0.38749	0.55608	0.75854	0.14869	0.1001	-0.13809	-0.381905	0.17912	0.20096	-0.16014	-0.15069	0.04622	0.10746	0.06469	0.11763	0.4776	0.64597	-0.143625	0.21458	0.030065	-0.000215	-0.54219	-0.82792	-0.30489	-0.07985	-1.55918	-1.20578	0.39199	0.37698	-0.93375	-0.336455	0.56542	0.619125	0.72325	0.63048	0.659285	0.49685	-0.27331	-0.376135
AMD_HUMAN	AGIEVQEIK	-0.96	0.285	1.14	0.26116	1.3	0.26116	-1.89525	-1.24272	-0.56054	-0.52878	-0.69293	-0.62259	-1.01409	-1.51615	-0.4798	-0.54856	-1.40291	-0.99197	-0.82749	-0.71239	-0.4876	-0.82651	-0.3949	-0.2591	-1.15485	-0.65969	-1.09018	-1.0653	-1.5935	-1.9987	-1.354	-1.14307	-2.02554	NA	-0.63138	-0.56398	-2.05656	-1.44437	-0.51856	-0.473535	-0.44362	-0.32933	0.042345	-0.60588	-1.59445	-1.76822
AMD_HUMAN	NNLVIFHR	-0.64	0.042	0.18	0.85624	0.03	0.85624	NA	-0.9846	-0.10843	-0.48298	NA	-0.90601	NA	NA	-0.92494	-1.12393	NA	NA	-0.75926	NA	-0.70235	NA	-0.28171	-0.00528	-0.797705	NA	NA	NA	NA	-1.37341	NA	-1.37181	NA	NA	-0.20841	-0.44934	-1.23254	NA	-0.36871	-0.262075	-0.24483	-0.13845	NA	-0.35605	-0.71882	-0.962875
AMD_HUMAN	NGQWTLIGR	-1.95	0.007	0.02	0.98434	0	0.98434	NA	NA	NA	NA	-2.19423	-2.59963	-2.02057	-1.82984	-1.27485	-1.68567	NA	-2.01445	-2.01778	-2.43837	-1.8699	-1.61823	NA	NA	NA	-2.27535	-1.89545	-1.62142	-2.67584	NA	NA	NA	NA	-3.35587	-1.23579	-1.32643	NA	NA	NA	-1.08689	NA	NA	NA	NA	NA	NA
AMD_HUMAN	ANILYAWAR	-1.79	-0.402	-1.1	0.29023	1.21	0.29023	NA	NA	NA	-1.55566	-1.8503	NA	NA	NA	-1.95502	-2.42665	NA	NA	NA	NA	NA	NA	-2.21856	-2.12974	NA	NA	-1.64579	-2.19216	NA	NA	NA	NA	NA	NA	-1.66007	NA	NA	NA	-1.1568	-1.38485	NA	-1.34974	NA	NA	NA	NA
AMD_HUMAN	GSGGLNLGNFFASR	-1.82	0.322	1.01	0.3204	1.02	0.3204	-3.04314	-2.28276	-1.43684	-0.95824	-1.83692	NA	-2.65318	-1.54496	-1.715	-1.54285	-1.9492	-1.46516	-1.35184	-1.50845	-1.61642	-1.1925	-1.71093	-1.44403	-1.99483	-1.33579	-2.91095	-2.37575	NA	NA	NA	-2.09296	-3.02268	NA	-1.2554	-1.17895	-2.84842	-2.55964	-1.5547	-1.12692	-1.2081	-1.05262	-1.75086	-1.50978	-2.74601	NA
AMD_HUMAN	IPVDEEAFVIDFKPR	0.82	-0.103	-0.42	0.67954	0.17	0.67954	NA	NA	1.67387	1.58411	0.51588	NA	0.67456	0.706715	1.01337	NA	0.8025	0.88019	NA	0.39104	NA	0.74525	-0.18027	NA	0.626005	NA	0.951685	0.809695	NA	NA	NA	NA	-0.27204	0.111365	1.40487	1.35948	NA	0.248385	1.17057	1.33516	1.45785	1.36908	0.352385	0.71055	NA	NA
AMD_HUMAN	DGNYWVTDVALHQVFK	-1.7	0.316	0.44	0.66656	0.2	0.66656	NA	NA	NA	-1.48968	NA	NA	NA	NA	-1.73806	NA	NA	NA	NA	NA	NA	NA	NA	NA	NA	NA	-3.70108	NA	NA	NA	NA	NA	NA	NA	NA	NA	NA	NA	-0.60372	-1.07882	-1.60447	-1.86315	-1.74449	-1.45275	NA	NA
AMD_HUMAN	EEEEVLDQGDFYSLLSK	-2.39	0.498	1.12	0.29582	1.27	0.29582	NA	NA	NA	-1.60013	NA	NA	NA	NA	-2.58771	NA	NA	NA	NA	NA	NA	NA	-2.2294	NA	NA	NA	NA	NA	NA	NA	NA	NA	NA	NA	NA	-2.87686	NA	NA	NA	NA	NA	-2.30471	-2.72995	NA	NA	NA
AMD_HUMAN	REEEEVLDQGDFYSLLSK	0.03	0.1	0.5	0.62151	0.25	0.62151	-0.09434	NA	0.52652	1.05854	0.21555	0.3039	-0.17446	0.271395	0.24077	0.25958	-0.10447	0.22828	-0.19325	-0.1532	-0.0907	0.00957	-0.2697	-0.15092	-0.567695	-0.21199	0.012435	0.287665	NA	NA	-0.51452	-0.28779	NA	-0.444655	0.63107	0.54239	-0.58978	-0.503765	0.38411	0.536935	0.65722	0.53814	-0.414285	-0.23167	NA	-0.596505
AMD_HUMAN	QSPQLPQAFYPVGHPVDVSFGDLLAAR	-1.88	-0.227	-0.57	0.57178	0.33	0.57178	-2.61939	-3.13127	0.28772	-0.10148	-3.52395	-3.4673	-2.42714	-2.09763	-1.25165	-1.63581	-1.67757	-1.63533	-1.84747	-2.07541	-1.8841	-2.297	NA	NA	NA	-2.54626	-2.51562	-2.11577	NA	NA	-3.32555	-3.28864	-2.47925	NA	-0.52523	-0.88424	-2.20622	NA	-0.98677	-1.33078	-0.21931	-0.58562	-2.23666	-1.51502	NA	NA
AMD_HUMAN	FITQWGEESSGSSPLPGQFTVPHSLALVPLLGQLCVADR	-2.8	-0.513	-0.52	0.6105	0.27	0.6105	NA	NA	-0.8374	-1.515	NA	NA	NA	NA	NA	NA	NA	NA	NA	NA	-4.22017	-2.84625	NA	NA	NA	-5.05437	NA	NA	NA	NA	NA	NA	NA	NA	-2.12834	-2.53463	NA	NA	NA	NA	-2.62931	-3.8469	NA	-2.35349	NA	-2.81128
ANGI_HUMAN	NVVVACENGLPVHLDQSIFR	0.38	NA	NA	NA	NA	NA	NA	NA	NA	NA	NA	NA	NA	NA	NA	NA	NA	NA	NA	NA	NA	NA	NA	NA	NA	NA	NA	NA	NA	NA	NA	NA	NA	0.378375	NA	NA	NA	NA	NA	NA	NA	NA	NA	NA	NA	NA
ANGT_HUMAN	LDTEDKLR	1.41	0.105	0.49	0.62675	0.24	0.62675	1.15659	1.52505	NA	NA	1.72669	1.61212	1.60543	1.78988	NA	NA	0.76392	NA	0.99538	NA	NA	NA	1.59432	1.68977	1.70391	2.00288	NA	NA	1.22261	1.63543	0.90364	1.28291	NA	NA	1.48134	1.5293	0.99188	1.25466	1.15373	NA	1.5204	1.63506	1.61347	NA	1.04223	1.29272
ANGT_HUMAN	FMQAVTGWK	4.08	-0.014	-0.11	0.91338	0.01	0.91338	4.28054	4.11334	4.64139	4.631	3.78324	3.60838	3.95063	4.13563	4.01005	3.70686	4.0423	4.04474	3.77864	3.70845	4.02049	4.16595	4.00004	3.84551	4.50749	4.57446	4.02609	3.98419	3.8563	4.06645	3.985	3.91307	3.9576	3.88647	4.40667	4.37693	3.84191	3.65	4.30393	4.30893	4.31687	4.23544	4.23332	4.3677	4.05302	4.06738
ANGT_HUMAN	LQAILGVPWK	-1.24	0.447	1.4	0.17864	1.96	0.17864	-0.11308	NA	-0.78436	-0.8217	NA	-1.43891	-1.15059	NA	-1.67921	-1.645	-1.70008	-1.4788	NA	NA	NA	-0.60073	NA	NA	NA	NA	NA	NA	NA	NA	NA	NA	NA	NA	-0.60055	-0.80304	NA	-2.53858	-1.28069	-1.21199	NA	-1.46127	-1.70511	NA	NA	NA
ANGT_HUMAN	ALQDQLVLVAAK	5	0.16	1.18	0.24389	1.4	0.24389	5.23432	5.3701	5.28473	5.35704	5.13283	5.28587	4.96994	5.11676	5.06552	4.899	4.64223	4.77672	4.59086	4.80518	4.87124	4.86481	5.11307	5.42914	5.25315	5.51896	4.83031	5.00059	4.69327	5.01448	4.78817	4.86	4.67972	4.78001	5.06644	5.06899	4.52333	4.64973	4.91919	5.13016	5.02952	5.03943	4.96366	4.93863	5.07787	5.31923
ANGT_HUMAN	DPTFIPAPIQAK	5.33	0.174	1.19	0.24071	1.42	0.24071	5.57499	5.83771	5.31885	5.29333	5.71675	5.73939	5.21817	5.45111	5.25052	5.06089	5.05472	5.17662	4.87622	4.93602	5.22939	5.25286	5.68853	5.96597	5.65695	5.96369	5.20718	5.35355	4.96801	5.38154	5.15641	5.29894	4.75418	4.79274	5.32345	5.33384	5.07137	5.07878	5.23904	5.41017	5.37741	5.3642	5.25887	5.32486	5.4445	5.65181
ANGT_HUMAN	SLDFTELDVAAEK	5.65	0.164	1.13	0.26337	1.29	0.26337	5.8368	6.0843	5.64051	5.87004	5.77989	5.82165	5.59283	5.84666	5.70849	5.44025	5.48921	5.61496	5.29172	5.4295	5.60186	5.56819	5.76003	6.03668	5.94998	6.28418	5.45312	5.6341	5.30899	5.68735	5.41303	5.61338	5.19217	5.38565	5.77428	5.72271	5.39648	5.22609	5.70156	5.93156	5.74306	5.69557	5.4169	5.58083	5.70443	5.78015
ANGT_HUMAN	AAMVGMLANFLGFR	-2.35	0.163	0.3	0.77163	0.09	0.77163	-2.5778	NA	-1.00737	-1.59731	NA	NA	NA	NA	-2.94321	NA	NA	-3.38208	-3.22338	NA	-1.99254	-1.33884	NA	NA	NA	NA	NA	NA	NA	NA	NA	NA	NA	NA	-1.57049	-2.06478	NA	NA	-3.72405	NA	-2.85639	NA	-2.63779	-1.96272	NA	NA
ANGT_HUMAN	VLSALQAVQGLLVAQGR	4.79	-0.069	-0.4	0.68916	0.16	0.68916	4.9402	5.12721	5.50638	5.55803	4.73975	4.80226	4.55206	4.70721	4.88785	4.71933	4.79112	4.95067	4.63883	4.61759	4.8323	4.89733	3.43941	3.62578	4.82017	4.91418	4.66681	4.54976	4.50684	4.8395	4.569	4.64787	4.85881	4.90949	5.29339	5.113	4.39062	4.51464	5.05998	5.10644	5.19557	4.86561	4.8204	5.14411	4.4973	4.89785
ANGT_HUMAN	VEGLTFQQNSLNWMK	3.45	0.061	0.24	0.81447	0.06	0.81447	3.97518	4.01942	2.06039	3.6312	3.46583	3.30141	3.50347	3.85969	3.35628	3.38879	3.27144	3.42697	3.01747	3.09275	3.56019	3.8495	3.37423	3.26331	4.04767	4.23833	3.47064	3.44613	3.12511	3.43484	3.42981	3.25587	2.88579	3.50805	3.51326	3.67329	3.3225	3.20688	3.46429	3.84863	3.24693	3.35076	2.83473	3.5953	3.96005	3.90217
ANGT_HUMAN	SLDFTELDVAAEKIDR	-1.18	-0.061	-0.19	0.84882	0.04	0.84882	-0.13231	-0.20218	-3.44497	-2.76611	0.00375	0.29279	-0.58341	-0.069645	-1.38034	-1.17219	NA	-2.22718	-2.17507	-1.75016	-1.4766	-0.90632	NA	-1.17151	-1.22141	-1.02865	-1.13302	-0.743895	-1.24189	-1.0665	-0.66816	-0.522	NA	NA	-1.51072	-0.98362	-1.23939	-1.6096	-1.42249	-1.11325	-0.79464	-1.23071	-1.96408	-1.56711	-1.12634	-1.15516
ANGT_HUMAN	QPFVQGLALYTPVVLPR	4.51	-0.074	-0.47	0.63775	0.23	0.63775	4.53998	4.67902	4.9806	5.16684	4.23566	4.31728	4.35199	4.55645	4.63158	4.53072	4.50212	4.67467	4.32841	4.24082	4.3937	4.47436	3.77991	3.56226	4.66683	4.78113	4.13225	4.03095	4.29259	4.43622	4.14526	4.41307	4.37903	4.6295	4.63148	4.63078	4.37561	4.29732	4.8891	4.95927	4.96789	4.71195	4.64269	4.89846	4.50622	4.90121
ANGT_HUMAN	ANAGKPKDPTFIPAPIQAK	2.45	0.24	1.45	0.15374	2.11	0.15374	3.03374	2.91216	2.13203	2.34856	2.90829	2.85233	3.20018	3.45405	2.41611	2.1664	1.84372	2.08857	1.69392	1.81954	2.18047	2.3324	2.89595	3.06295	2.8596	3.11498	2.23144	2.45213	2.34774	2.57802	2.31816	2.51644	2.19011	2.20919	2.16814	2.15187	2.25933	2.23983	2.09171	2.26932	2.69222	2.65573	2.18376	2.21161	2.26707	2.47377
ANGT_HUMAN	VGEVLNSIFFELEADER	-3.29	2.022	0.85	0.42955	0.73	0.42955	NA	NA	NA	NA	NA	NA	NA	NA	NA	NA	NA	NA	NA	NA	NA	NA	NA	NA	-1.85044	NA	NA	NA	NA	NA	NA	NA	-4.25102	NA	NA	NA	NA	NA	NA	NA	NA	NA	NA	NA	-2.2504	-4.80511
ANGT_HUMAN	LDAHKVLSALQAVQGLLVAQGR	-0.16	0.201	0.74	0.4631	0.55	0.4631	0.04715	0.03731	-0.02788	0.11165	-0.87128	-0.74816	-0.83323	-0.640125	-0.90763	-1.29864	-0.08131	0.15267	0.40249	0.1697	0.90517	0.51132	NA	NA	1.04136	1.14079	-0.762075	-0.725995	-0.64482	-0.74133	-1.10278	-0.53166	-1.15673	-1.27058	-0.14739	-0.02601	-0.31639	-0.276055	0.55237	0.151835	0.36239	0.31187	-0.472095	0.44104	0.63264	0.709915
ANGT_HUMAN	ADSQAQLLLSTVVGVFTAPGLHLK	-2.66	NA	NA	NA	NA	NA	NA	NA	-2.61841	-2.69422	NA	NA	NA	NA	NA	NA	NA	NA	NA	NA	NA	NA	NA	NA	NA	NA	NA	NA	NA	NA	NA	NA	NA	NA	NA	NA	NA	NA	NA	NA	NA	NA	NA	NA	NA	NA
ANGT_HUMAN	VYIHPFHLVIHNESTCEQLAK	-1.06	-0.407	-0.64	0.54514	0.41	0.54514	NA	NA	NA	NA	NA	NA	NA	NA	NA	NA	NA	NA	NA	-1.97698	NA	NA	NA	NA	-0.901105	-0.57525	NA	NA	NA	-0.75859	NA	NA	NA	NA	NA	NA	NA	NA	NA	NA	NA	NA	NA	NA	NA	-1.08577
ANGT_HUMAN	TGCSLMGASVDSTLAFNTYVHFQGK	-1.36	-0.502	-1.22	0.23331	1.49	0.23331	-1.41277	-2.06686	-0.83208	NA	-0.32415	-0.9957	-2.08855	-2.23683	-2.38708	NA	NA	NA	-0.72204	-1.37873	-2.06247	-1.69976	NA	NA	-1.28269	-2.54112	NA	NA	NA	NA	NA	NA	-1.31035	-1.45365	NA	NA	-1.10377	-0.824655	-0.6438	NA	-0.86533	-0.2963	-1.59469	NA	-1.45821	-1.12765
ANGT_HUMAN	EPTESTQQLNKPEVLEVTLNRPFLFAVYDQSATALHFLGR	-2.58	0.359	0.57	0.57539	0.32	0.57539	-3.12868	NA	-0.34502	-1.83803	NA	NA	NA	NA	-2.14905	-2.42052	-2.82043	-2.51589	-3.67355	NA	-2.49711	-1.83282	NA	NA	NA	NA	NA	NA	NA	-3.5054	NA	NA	-2.83578	-3.17087	-1.35286	-1.9748	-2.49561	-3.86393	NA	NA	-2.50246	-3.30373	-3.64132	-2.00468	-2.81955	NA
ANT3_HUMAN	ELFYK	1.14	-0.174	-0.8	0.42762	0.64	0.42762	0.89537	0.93779	0.59062	0.74255	1.28049	1.21035	1.15858	0.654055	0.09405	0.44879	1.46057	1.10031	1.56328	1.31722	1.09765	1.33636	1.29374	0.88359	1.61098	1.48217	1.76387	1.24063	1.31257	0.80364	2.0867	2.19602	1.79365	1.74436	0.57928	0.53239	1.39569	1.73948	0.47829	0.440205	0.53547	0.56051	1.15823	1.32572	1.59594	1.35773
ANT3_HUMAN	IEDGFSLK	2.1	0.138	0.51	0.61048	0.26	0.61048	2.36906	2.43175	0.71856	0.56295	2.83309	2.88311	1.68284	2.36187	1.78491	1.52136	1.92675	1.97272	1.86664	2.0753	2.23965	2.44159	3.01159	3.23501	2.59761	2.91779	2.57679	2.80308	2.48658	2.8866	2.72941	2.97871	2.32596	2.31534	0.94548	1.12957	2.4681	2.40667	1.6354	1.34425	1.03291	0.92676	0.939005	1.36333	2.63741	2.74456
ANT3_HUMAN	LPGIVAEGR	1.52	-0.126	-0.78	0.43989	0.61	0.43989	1.37575	1.60147	0.94871	0.94361	1.362	1.39667	1.51713	1.21991	1.40214	1.43035	1.36762	1.57269	1.5111	1.47957	1.49333	1.52213	1.70522	1.76608	1.65931	1.81626	1.44036	1.15098	1.82962	1.57657	1.52236	1.60371	0.70131	1.13257	1.57239	1.55486	2.14856	2.57967	1.30314	1.43223	1.33602	1.25219	1.65326	1.67086	2.1746	1.98359
ANT3_HUMAN	SKLPGIVAEGR	1.78	0.013	0.06	0.95325	0	0.95325	1.60041	2.00208	0.75963	0.92049	2.02027	1.95238	1.88226	1.49558	1.02488	1.22422	1.54163	1.76624	1.88898	1.98473	1.67437	1.9784	2.46571	2.59671	2.47722	2.49865	2.32919	2.27951	1.9807	1.64718	2.60351	2.82971	2.28443	1.99839	0.98935	1.00031	1.91865	2.16485	0.74194	1.05469	0.89433	0.89829	1.40227	1.82751	2.30357	2.33865
ANT3_HUMAN	FRIEDGFSLK	-0.11	0.257	0.53	0.60021	0.28	0.60021	0.10029	0.02209	NA	NA	0.27755	0.39403	0.04788	0.166185	-0.47276	-0.67737	NA	NA	-0.36234	0.46044	-0.26287	0.05486	-0.09745	-0.12344	0.541305	0.33756	0.516425	0.454455	-0.00051	0.43898	0.94641	0.86562	-3.75927	-4.98405	NA	NA	0.91395	0.511045	-0.48698	-0.651205	NA	NA	NA	0.23105	0.53882	0.610425
ANT3_HUMAN	DDLYVSDAFHK	2.85	-0.034	-0.17	0.86255	0.03	0.86255	2.96986	2.86961	2.00548	1.86174	2.89061	2.80854	2.95638	2.92796	2.32393	2.21698	2.81903	2.85293	2.96085	2.78986	2.85409	2.9452	3.37281	3.29386	3.56146	3.41797	3.33468	3.2986	3.03192	3.09916	3.59734	3.4371	3.68126	3.54153	2.11194	2.06827	3.29606	3.07452	2.10295	2.11506	1.94754	1.91012	2.4145	2.84183	3.15849	3.31655
ANT3_HUMAN	TSDQIHFFFAK	2.51	-0.115	-0.64	0.52814	0.4	0.52814	2.70007	2.79445	2.13484	1.94705	2.46253	2.24294	2.54458	2.77259	2.09186	1.89385	2.55703	2.43267	2.68516	2.68291	2.43856	2.55336	2.23452	2.27888	2.88031	2.7589	2.94247	3.04937	2.59782	2.75138	3.179	3.31708	3.3557	3.38115	1.73175	1.90541	2.93671	2.72505	1.73258	1.91254	1.70527	1.67191	2.21235	2.26944	3.02323	2.97802
ANT3_HUMAN	EVPLNTIIFMGR	3.79	-0.086	-0.33	0.74282	0.11	0.74282	3.53944	3.7313	2.99461	3.21124	3.97785	3.94393	3.49091	3.63248	3.25435	3.19319	3.86003	3.90766	3.86928	3.85634	3.86009	3.98788	3.78316	3.6116	3.84531	5.42557	4.13706	3.96596	3.97792	4.19038	4.37582	4.2916	4.41227	4.58941	3.22118	3.23094	3.92599	4.01657	3.24863	3.2452	3.1257	2.97533	3.42833	3.72368	4.60487	4.0042
ANT3_HUMAN	DIPMNPMCIYR	4.4	-0.07	-0.37	0.71527	0.13	0.71527	4.42294	4.38221	3.85177	3.97671	4.47518	4.193	4.12813	4.39278	3.87687	3.60027	4.44504	4.48965	4.54285	4.41283	4.52576	4.66481	4.59159	4.39975	4.8586	5.08053	4.86273	4.83659	4.72626	5.06069	5.12242	4.97932	5.04474	5.27013	3.70233	3.70372	4.76901	4.68565	3.79978	3.87189	3.55424	3.43749	3.85279	4.14466	4.6005	4.69142
ANT3_HUMAN	VAEGTQVLELPFK	3.63	0.106	0.46	0.64554	0.21	0.64554	3.73226	3.88236	2.60876	2.96901	3.97695	3.98544	3.45106	3.89555	3.28207	3.14499	3.58176	3.72453	3.51392	3.81953	3.64548	3.73608	4.16576	4.37335	3.75838	4.32148	3.88056	4.06525	3.68019	4.20556	4.06827	4.26065	3.96435	4.33842	2.60689	2.8618	3.72059	4.05745	2.94281	3.18736	2.63806	2.64313	3.08053	3.24749	3.80372	4.1959
ANT3_HUMAN	FATTFYQHLADSK	3.53	0.035	0.18	0.8586	0.03	0.8586	3.4134	3.52289	2.82186	2.87167	3.75646	3.77351	3.55977	3.83828	3.14776	2.98961	3.52798	3.41927	3.47619	3.51082	3.36362	3.52665	4.0406	4.15925	4.01237	4.15745	3.91295	3.92806	3.68501	4.01304	4.06562	4.15155	4.31418	4.17105	2.78986	2.7835	3.79761	3.75271	2.79552	2.88794	2.78204	2.72269	3.30743	3.47315	3.07405	3.78227
ANT3_HUMAN	RVAEGTQVLELPFK	1.04	0.03	0.13	0.89924	0.02	0.89924	0.63521	0.86894	-0.01092	-0.00019	1.21493	1.13065	0.99468	1.48277	0.77736	0.4278	1.26514	1.06968	0.98879	1.27153	1.19122	1.34869	1.43628	1.72396	1.57458	1.73443	1.35187	1.47508	1.08513	1.66923	1.51229	1.77259	1.84896	1.94998	0.06561	-0.0122	1.66024	1.59952	0.28072	0.260065	-0.16922	-0.16181	0.969075	1.02642	1.16361	1.18385
ANT3_HUMAN	GDDITMVLILPKPEK	3.35	-0.096	-0.55	0.58294	0.31	0.58294	3.46376	3.29323	2.73805	2.79354	3.453	3.33385	3.61969	3.57504	2.91208	2.89864	3.46195	3.55607	3.36572	3.33236	3.6082	3.63774	2.78617	2.78555	3.79878	3.70927	3.78493	3.81166	3.6628	3.65592	3.76699	3.84211	4.12354	4.34804	2.76854	2.80386	3.60096	3.62574	2.76816	2.85295	2.44372	2.32739	3.05721	3.12519	3.72104	3.95484
ANT3_HUMAN	LQPLDFKENAEQSR	1.42	0.03	0.11	0.91665	0.01	0.91665	1.48504	1.58603	-0.54575	0.03362	1.79918	1.95153	1.83024	2.04348	1.05758	0.59493	1.5462	1.59937	1.32418	1.74164	1.3411	1.38339	2.09058	2.2941	1.55947	1.91716	0.798695	1.79777	1.8412	2.19984	2.16471	2.50508	2.28861	2.45592	0.49522	0.44813	1.74069	2.03818	0.44556	0.508565	0.75612	0.40566	1.18617	1.31732	1.27955	1.35417
ANT3_HUMAN	ADGESCSASMMYQEGK	1.3	0.136	0.56	0.57579	0.32	0.57579	1.08087	1.16016	0.60574	0.7967	1.7098	1.59513	1.46951	1.23609	0.73337	0.40122	0.92496	0.97682	1.05404	1.23137	1.49021	1.39771	2.09232	2.15828	2.19488	2.5087	1.61389	1.82712	2.06104	1.40459	1.86025	1.86903	2.20252	1.92501	0.17675	0.21388	1.54958	1.54387	0.53815	0.579625	-0.06377	NA	0.797215	0.84289	1.46972	1.52062
ANT3_HUMAN	EQLQDMGLVDLFSPEK	3.7	-0.083	-0.45	0.65246	0.21	0.65246	3.54904	3.77337	2.95811	3.22918	3.53889	3.76456	3.53842	3.58569	3.30683	3.21199	3.74199	3.95831	3.71431	3.64048	3.75839	3.80692	3.85807	3.66677	4.23508	4.24194	4.16306	4.05772	3.94999	4.11121	4.13994	4.2837	4.32959	4.63124	2.82908	2.89427	3.842	3.9412	3.27343	3.21488	3.08919	2.94217	3.2618	3.6573	3.88521	4.2457
ANT3_HUMAN	ATEDEGSEQKIPEATNR	-0.05	0.179	0.52	0.60368	0.27	0.60368	-0.75724	-0.28557	-1.84534	-1.64843	0.89875	0.78476	0.68958	0.894035	-0.30398	-0.90483	-0.66265	-0.03385	-0.11587	0.26674	0.03268	0.11349	1.0047	1.27273	0.425555	0.95715	-0.485165	0.348425	0.62215	1.14683	0.2322	0.30226	0.61888	0.819325	NA	NA	0.31029	0.627215	-1.16499	-0.918545	-1.76293	-1.38736	-0.232115	-0.42317	-0.77141	-0.395235
ANT3_HUMAN	KATEDEGSEQKIPEATNR	-0.19	0.366	1.06	0.29556	1.12	0.29556	-0.82502	-0.70378	-1.63186	-1.64693	0.75067	0.73754	0.8947	1.15372	-0.44547	-1.02579	-0.69424	0.07735	-0.27813	-0.09944	0.15383	-0.00172	0.9934	1.33416	0.445005	0.76405	-0.549835	-0.110945	0.85197	1.16057	0.22933	0.48135	1.04274	1.31923	-1.87343	-1.92739	0.37134	0.436515	-1.61011	-1.11207	-1.68689	-1.42023	-0.448935	-0.6886	-0.98422	-0.844615
ANT3_HUMAN	AFLEVNEEGSEAAASTAVVIAGR	-2.01	0.202	0.44	0.66083	0.2	0.66083	-1.14643	-1.86593	NA	NA	-1.62318	-1.68685	-1.47407	NA	NA	NA	-2.17145	NA	-1.9045	-1.96392	-1.29698	-1.93033	-2.71988	-2.65568	-2.46191	-2.5072	-1.57386	-3.01219	-3.25938	NA	-1.94772	-0.57446	-1.22475	-1.73167	NA	NA	-2.08124	-2.46975	NA	NA	NA	NA	-1.6686	-2.37838	-2.85001	-2.20336
ANT3_HUMAN	NDNDNIFLSPLSISTAFAMTK	2.53	-0.38	-1.19	0.23998	1.42	0.23998	2.18523	2.13713	2.33229	2.48163	1.99588	1.67776	2.35495	2.69351	2.29593	2.07242	2.92768	2.99077	2.62791	2.65096	2.80536	2.87616	1.62919	-0.37414	3.15096	3.22727	2.62835	2.56264	2.64115	2.53053	3.01878	2.86442	3.32398	3.65842	2.1605	2.21773	3.051	3.02002	2.67274	2.31926	1.94284	1.91735	2.22751	2.68972	3.41612	3.47851
ANT3_HUMAN	VAEGTQVLELPFKGDDITMVLILPKPEK	3.64	-0.5	-1.05	0.2987	1.11	0.2987	3.65311	3.40164	3.81725	3.75084	3.74147	3.54227	3.62613	3.64519	3.56005	3.45657	3.9588	4.1341	4.06068	3.97276	4.16704	4.00542	1.08744	-1.905	4.1539	4.01872	4.09675	3.77589	4.01901	4.27521	3.91672	3.83827	5.2031	5.27576	3.36526	3.23557	4.36445	4.41812	3.06154	2.88944	3.40694	3.10959	3.71224	3.89893	3.86726	4.11813
ANT3_HUMAN	RVAEGTQVLELPFKGDDITMVLILPKPEK	-0.58	-0.219	-0.6	0.54908	0.37	0.54908	-0.29707	-1.57482	-0.70578	-1.45181	-0.52936	-0.84358	-0.88584	-1.0048	-1.3012	-1.97938	-0.68642	-0.22225	-0.11329	-0.39592	0.05514	-0.36139	NA	NA	9.5e-05	-0.19168	-0.345295	-0.596255	0.29023	0.29314	-0.01288	-0.47665	1.05302	1.02493	-1.05947	-1.54235	0.76468	0.276615	-2.21571	-2.27108	-1.47535	-1.50203	-0.499535	-0.18531	-0.12234	-0.891135
APLP1_HUMAN	LVETHATR	-1.21	0.456	1.81	0.07781	3.29	0.07781	NA	-1.64872	0.05104	-0.24413	-1.43905	-1.598	-0.83492	-0.956385	-0.67982	-0.77528	-1.02087	-0.55456	-1.10952	-0.99004	NA	-1.20291	-0.76462	-0.46129	-1.3637	-1.7933	-1.77477	-1.12569	-1.88698	-1.78086	-2.19136	-1.9996	NA	-2.73286	-0.73643	-0.88024	-1.61905	-1.89626	-0.96209	-0.924565	-0.55702	-0.61828	NA	-0.38384	-1.99867	-2.06875
APLP1_HUMAN	DDTPMTLPK	2.85	0.363	1.92	0.06201	3.68	0.06201	2.76069	2.92776	3.48559	3.51923	2.91515	2.88404	2.67787	2.49128	3.22608	3.09738	2.6036	2.83314	2.84238	2.91132	3.28327	3.1291	3.46994	3.41561	2.92591	3.22769	3.00655	2.83616	2.73137	2.17836	2.5907	2.66264	1.21703	1.52859	3.0619	3.1741	1.99731	2.19692	3.15599	3.33169	2.81833	2.83739	3.23378	3.20538	2.93831	2.66353
APLP1_HUMAN	VIALINDQR	2.99	0.244	1.43	0.16144	2.03	0.16144	3.10653	3.02591	3.43085	3.43535	2.92526	2.99061	2.84959	2.99977	3.38893	3.14747	2.81351	2.90214	3.04388	2.92718	3.19508	3.18093	3.38836	3.75285	2.82605	2.99736	3.10028	3.29526	2.45726	2.78644	2.70126	2.92694	1.58513	1.5052	3.21924	3.10917	2.48396	2.40806	3.36078	3.35365	3.1961	3.11415	3.35963	3.38919	2.98233	3.11474
APLP1_HUMAN	DELAPAGTGVSR	1.91	0.476	1.45	0.15518	2.1	0.15518	3.47411	3.32436	0.81929	0.8924	2.46927	2.62559	1.85793	1.66518	2.18708	2.13427	1.17933	1.4783	1.86201	2.15616	2.53877	2.29052	2.86165	3.19914	1.76035	2.12302	2.30565	1.76489	1.85232	2.18243	2.44515	2.25151	-0.88145	0.464115	1.19279	1.32067	1.74665	1.66431	1.42867	1.72833	0.95905	1.00006	1.81092	1.42957	3.37202	3.3485
APLP1_HUMAN	EWAMADNQSK	1.54	0.256	1.27	0.21219	1.62	0.21219	NA	1.41354	2.02674	2.41235	1.23777	1.27894	1.52137	1.32634	1.86087	1.81283	1.00491	NA	1.28033	1.50761	1.95138	1.85203	2.00758	2.04302	1.47033	1.91281	NA	NA	1.27051	0.98645	0.99945	1.04304	NA	NA	1.5791	1.57768	0.64579	NA	1.77748	2.09062	NA	1.52411	NA	1.93763	1.22772	1.12231
APLP1_HUMAN	MNPLEQYER	2.9	0.283	1.59	0.11953	2.53	0.11953	3.02665	3.11815	3.48334	3.71463	2.74397	2.77168	2.74048	2.89624	3.32992	3.17757	2.58882	2.64325	2.77036	2.9643	3.14388	3.12552	3.31616	3.49141	2.7401	3.06579	2.98367	3.15661	2.4716	2.84648	2.43639	2.51082	1.56219	1.71995	3.09698	3.14779	2.10406	2.19627	3.14206	3.38596	3.09015	3.044	3.30041	3.30528	2.68919	3.00569
APLP1_HUMAN	QMYPELQIAR	3.25	0.223	1.28	0.2088	1.63	0.2088	3.38309	3.42733	3.9856	4.11676	2.7412	2.83485	3.03673	3.1591	3.61864	3.42462	3.07202	3.41581	3.16511	3.27535	3.42021	3.48735	3.56841	3.57931	3.1035	3.40321	3.30222	3.38152	2.75987	3.00671	2.94342	3.00053	2.04761	2.13377	3.60875	3.54142	2.48552	2.56399	3.52405	3.78545	3.4895	3.45067	3.60353	3.78359	3.04096	3.29992
APLP1_HUMAN	VEQATQAIPMER	3.93	0.414	1.92	0.06155	3.69	0.06155	3.93749	4.09143	4.36132	4.77729	3.94947	4.0494	4.18676	3.96348	4.3292	4.15031	3.55157	3.68517	3.84565	3.99897	4.0977	4.36194	4.57438	4.72964	3.83774	4.32732	3.95065	3.98123	3.62203	3.42785	3.77607	4.03527	2.10009	1.88546	4.25839	4.32518	2.86817	3.20077	4.10791	4.39989	3.899	3.9982	4.32205	4.34917	3.98777	4.03317
APLP1_HUMAN	HYQHVAAVDPEK	2.57	0.401	1.91	0.06255	3.66	0.06255	2.61044	2.24476	3.37926	3.43606	2.45146	2.02002	3.17746	2.97412	3.37707	2.83347	2.35796	2.42794	2.44129	2.44047	3.36932	2.82024	2.83748	3.02046	2.5268	2.65727	2.08799	2.31022	2.48677	2.30593	1.74261	2.01617	1.86515	1.86047	2.42927	2.41039	1.73172	1.9573	2.91497	2.86969	2.87562	2.98861	3.50386	2.97368	1.96848	2.08536
APLP1_HUMAN	FQVHTHLQVIEER	-0.29	0.379	1.55	0.12967	2.39	0.12967	0.31105	0.16686	-0.02376	-0.05593	-0.12988	0.37653	0.26422	0.109765	-0.20285	-0.22147	-0.56394	-0.54134	-0.27387	-0.347	-0.08702	0.01887	0.07867	-0.20972	-0.232325	-0.42705	-0.430935	-0.441705	-0.59126	-0.47134	-0.57398	-0.34372	-1.73139	-2.777	-0.11228	-0.29693	-0.8624	-1.48043	0.08058	-0.051365	-0.06493	-0.05172	0.294785	0.13676	0.21166	-0.004695
APLP1_HUMAN	SGSCAHPHHQVVPFR	1.28	0.344	1.76	0.08652	3.09	0.08652	1.4939	1.05438	1.89997	1.96793	0.82998	0.56343	2.06596	1.99131	1.61165	1.37536	0.89637	1.5023	1.30175	1.40974	1.69004	1.62859	1.84564	1.57876	1.2511	1.05397	1.18193	1.23081	0.97918	0.93996	1.3398	NA	0.1596	0.607115	1.30536	1.24834	0.36818	0.500135	1.5748	1.55621	1.59058	1.68822	1.24511	1.62775	0.86417	0.817625
APLP1_HUMAN	AALEGFLAALQADPPQAER	4.17	0.141	0.7	0.49045	0.48	0.49045	4.17155	4.52218	4.90225	5.09145	3.76907	3.96971	4.09791	4.26067	4.58765	4.65251	4.17587	4.28253	4.1582	4.15491	4.15986	4.3408	3.87463	3.69567	3.93725	4.02923	4.30453	4.08427	3.62169	3.81359	3.75526	4.11357	2.82601	3.16016	4.4161	4.50193	3.50486	3.46855	4.72684	4.88187	4.78623	4.55864	4.38291	4.76529	3.90918	4.43459
APLP1_HUMAN	CLPGEFVSEALLVPEGCR	2.34	0.079	0.33	0.74359	0.11	0.74359	2.22367	2.62613	3.47595	3.58866	1.50004	1.78588	1.89921	2.03906	2.81058	2.71865	2.45961	2.56287	2.52423	2.41547	2.54084	2.62006	1.9042	1.69973	2.04506	2.05493	2.36841	2.36457	1.60215	1.75787	2.00584	1.9277	0.91783	1.28733	2.90583	2.83468	1.56052	1.45487	3.19297	3.14315	3.12804	2.89127	2.89558	3.26568	1.88599	2.52976
APLP1_HUMAN	RAALEGFLAALQADPPQAER	2.58	0.126	0.57	0.57201	0.32	0.57201	2.48187	2.90197	3.27065	3.59695	2.16541	2.32489	2.59349	2.70255	2.96522	2.99116	2.71641	2.87377	2.71236	2.60278	2.46282	2.83199	1.91646	1.64806	2.12294	2.35139	2.66355	2.4813	1.86581	2.00513	2.53467	2.38783	1.19463	NA	3.00147	3.24816	1.83394	1.96087	2.99529	3.07559	3.43306	3.0777	2.81896	3.12294	2.14229	2.45499
APLP1_HUMAN	QALNEHFQSILQTLEEQVSGER	3.98	-0.307	-0.71	0.48447	0.5	0.48447	4.02427	4.18117	5.2296	5.53746	3.0567	3.16471	3.69644	4.06358	4.85185	4.63922	4.3953	4.61794	4.42956	4.30323	4.22263	4.40967	1.36485	-0.8473	3.39337	3.70853	3.87507	4.00718	3.17232	3.14488	3.40948	3.75541	3.53538	3.90182	4.68597	4.82197	3.65597	3.79707	4.75978	4.87789	4.99734	4.84881	4.57557	5.03586	3.56274	4.16432
APLP1_HUMAN	HQEAQEACSSQGLILHGSGMLLPCGSDR	2.51	0.156	0.83	0.41084	0.69	0.41084	2.79094	2.42496	3.29251	3.30693	1.98902	2.23928	2.72232	2.72512	2.71779	2.81288	2.18949	2.38469	2.15092	2.17858	2.75861	2.79882	2.62762	2.43792	2.31505	2.59596	2.74185	2.39002	2.12746	2.10099	1.91811	1.80413	NA	NA	NA	2.37133	NA	NA	2.78289	2.16243	2.55523	2.54925	2.93373	3.03557	2.50526	2.3064
APLP1_HUMAN	RHQEAQEACSSQGLILHGSGMLLPCGSDR	1.12	0.326	1.74	0.08987	3.02	0.08987	1.71097	1.24069	1.22192	1.62851	0.92133	0.99063	1.33445	1.38647	1.37409	1.13317	0.85565	1.12027	0.94308	0.96294	1.57456	1.62569	1.57408	1.3159	1.34021	1.44426	1.26378	1.19015	1.00592	1.07439	0.84706	0.60901	-0.32452	0.199935	1.07166	0.98357	0.16275	0.429285	1.25979	1.53262	1.08581	1.39027	1.35213	1.51576	1.26047	1.27832
APLP2_HUMAN	EMIFNAER	1.43	0.296	1.77	0.08338	3.15	0.08338	1.65805	1.28096	1.47234	1.6162	1.76584	1.80117	1.40599	1.48334	1.59996	1.39058	0.98606	1.30228	1.60236	1.67293	1.62016	1.54205	1.86131	2.08459	1.61421	1.8736	1.5067	1.69595	1.58568	1.69953	1.40489	1.30007	0.02176	0.226305	1.43824	1.61592	0.75549	0.760065	1.64467	1.79577	1.5071	1.49087	1.29655	1.57171	1.22042	1.16724
APLP2_HUMAN	VSIDNWCR	-0.39	0.577	1.54	0.13662	2.38	0.13662	0.26105	NA	-0.61987	0.04852	-0.02491	-0.23607	-0.04649	-0.190525	0.46538	0.37268	-1.36202	-1.02327	NA	NA	NA	NA	NA	NA	-0.034845	0.3568	NA	NA	NA	NA	-0.27157	-0.18928	-2.51445	-2.48374	NA	NA	-0.40784	-0.360425	NA	NA	0.02066	0.15898	-0.499325	NA	NA	NA
APLP2_HUMAN	EWEEAELQAK	-2.44	1.144	3.14	0.00997	9.89	0.00997	-2.08629	-2.17404	NA	NA	NA	NA	NA	-2.62355	NA	NA	NA	NA	NA	NA	NA	-2.38384	NA	-1.94236	-2.00441	-2.00907	NA	NA	NA	NA	-3.09044	NA	NA	NA	NA	NA	-3.62119	NA	NA	NA	NA	NA	NA	NA	NA	NA
APLP2_HUMAN	AVCSQEAMTGPCR	-3.21	0.602	1.45	0.16458	2.11	0.16458	NA	NA	-2.82423	-2.93253	-2.8129	-3.15644	NA	NA	-2.66522	-3.05079	NA	-4.07982	NA	-3.8639	-3.25496	-3.24489	NA	-2.71426	NA	-2.07833	NA	NA	NA	NA	NA	NA	NA	NA	NA	-4.4689	NA	NA	NA	-3.02906	-3.78729	-3.35728	NA	NA	NA	NA
APLP2_HUMAN	GSGVGEQDGGLIGAEEK	-0.59	0.452	1.9	0.06591	3.6	0.06591	-0.77208	-0.29325	-0.64141	-0.10813	-0.24751	-0.09836	-0.23942	-0.527315	-0.22061	-0.24936	-1.54114	-0.83343	-0.72069	-0.36027	-0.30236	-0.39406	-0.28802	-0.0035	-0.344585	0.03909	-1.30671	-1.29456	-0.96364	-1.29069	-0.81005	-0.43551	NA	NA	NA	NA	NA	NA	-0.75429	-0.310225	-0.65602	-0.39658	-0.634815	-0.87877	-1.16695	-1.12912
APLP2_HUMAN	CLVGEFVSDVLLVPEK	-2.63	0.776	1.04	0.34313	1.08	0.34313	NA	NA	-2.13165	-2.34461	NA	NA	NA	NA	NA	NA	NA	NA	NA	NA	NA	NA	NA	NA	NA	NA	NA	NA	NA	NA	NA	NA	NA	NA	NA	NA	NA	NA	NA	NA	-3.05683	-2.9718	NA	NA	NA	NA
APLP2_HUMAN	MALENYLAALQSDPPRPHR	-1.35	2.063	3.2	0.01191	10.22	0.01191	-0.0569	NA	NA	NA	NA	NA	-0.87419	NA	NA	NA	NA	NA	NA	NA	NA	-0.81748	NA	NA	-1.25762	-0.87946	NA	NA	NA	NA	NA	NA	NA	NA	NA	NA	-3.82082	NA	NA	-1.73062	NA	NA	NA	NA	NA	NA
APOA1_HUMAN	AKPALEDLR	3.85	-0.018	-0.09	0.93234	0.01	0.93234	3.32104	3.59041	3.03698	3.11633	4.19066	4.12017	3.35689	3.22946	3.87336	4.083	4.37745	4.53109	4.28768	4.42465	4.00956	4.20601	3.66919	3.66791	3.88241	3.90836	4.70479	4.57393	4.13108	4.04566	4.19145	4.38228	4.57094	4.92577	3.26014	3.22936	4.51149	4.63389	2.69359	2.92021	3.50504	3.54998	3.31777	3.55234	3.23681	3.30127
APOA1_HUMAN	LSPLGEEMR	6.46	-0.065	-0.32	0.75396	0.1	0.75396	6.0448	6.19238	5.47419	5.81234	6.5499	6.58479	5.79178	NA	6.66367	6.42462	6.82777	7.08941	6.694	6.89134	6.76056	6.67248	6.15799	6.4465	6.49606	6.79714	7.13157	7.27363	6.81883	7.10426	6.67273	6.82244	7.2097	7.38863	5.84079	5.93503	6.99864	7.05715	5.55315	5.59049	5.98111	6.00056	6.12667	6.13586	5.84024	6.08899
APOA1_HUMAN	LEALKENGGAR	2.42	-0.028	-0.11	0.9166	0.01	0.9166	1.54036	2.01043	1.67326	1.7903	2.70474	2.70641	1.97886	2.04316	2.75752	2.52983	2.87341	3.43758	2.76498	3.09963	2.60081	2.81443	2.00435	2.09667	2.10936	2.55779	2.90951	3.21157	2.7384	3.0491	2.59488	2.87412	3.73905	3.94041	1.66851	1.73043	3.15649	3.37563	1.15828	1.47513	2.08051	2.24867	2.08005	1.91795	1.133	1.57123
APOA1_HUMAN	ATEHLSTLSEK	3.81	0.06	0.26	0.79853	0.07	0.79853	3.26014	3.42007	3.0937	3.19433	3.95576	3.86733	3.33811	3.45067	4.14198	3.90298	4.30574	4.81567	4.15286	4.3432	4.24011	4.27256	3.60118	3.53323	3.78838	4.04483	4.30464	4.51443	3.99766	4.24711	3.97698	4.05174	5.07164	5.19435	3.04002	3.12029	4.42483	4.63108	2.58208	2.86969	3.40653	3.47684	3.25775	3.39434	2.75148	3.20667
APOA1_HUMAN	QGLLPVLESFK	5.87	-0.066	-0.31	0.75937	0.1	0.75937	5.48829	5.78055	5.25855	5.4618	6.0386	6.17794	5.06967	5.11848	6.09213	6.03509	6.56169	6.73149	6.33041	6.34508	6.03775	6.1282	5.32568	5.21509	5.64046	5.87293	6.56435	6.5485	6.07807	6.25909	6.16423	6.13912	6.84577	7.21054	5.36298	5.42994	6.56336	6.51046	5.00816	5.11221	5.66584	5.44618	5.28901	5.45421	4.98727	5.39112
APOA1_HUMAN	DLATVYVDVLK	5.15	-0.044	-0.22	0.8308	0.05	0.8308	4.6994	5.08325	4.45544	4.60529	5.16685	5.15098	4.45809	4.50352	5.44675	5.32459	5.72133	5.84722	5.60627	5.58873	5.46716	5.55377	4.54582	4.49752	5.29026	5.47945	5.8323	5.57871	5.24293	5.29843	5.24926	5.19598	6.2928	6.58164	4.55591	4.44661	5.65964	5.75143	4.4991	4.43755	4.56748	4.50993	4.69327	4.70155	5.01076	5.26009
APOA1_HUMAN	VQPYLDDFQK	6.03	0.013	0.06	0.95118	0	0.95118	5.63394	5.86423	5.09428	5.25452	6.19442	6.23715	5.34827	5.55555	6.20611	6.06705	6.48608	6.77174	6.24395	6.42778	6.23328	6.26263	5.95397	6.25577	6.06999	6.48585	6.64639	6.79899	6.13159	6.49961	6.22253	6.32649	7.01061	7.159	5.19571	5.17555	6.63124	6.7222	5.07142	5.28493	5.45253	5.46898	5.56299	5.55571	5.59724	5.86815
APOA1_HUMAN	WQEEMELYR	4.36	-0.124	-0.56	0.57884	0.31	0.57884	3.99694	4.05415	3.75881	3.91907	4.19851	4.02827	3.61863	3.95952	4.67021	4.40183	4.9727	5.03268	4.76335	4.89469	4.5886	4.76763	3.54776	3.34053	4.59671	4.93359	4.97572	5.04781	4.58963	4.99605	4.51308	4.5829	5.38259	5.51924	3.62653	3.54277	5.1348	5.20116	3.46779	3.75989	3.95806	3.96445	3.99909	4.13258	3.89603	4.22567
APOA1_HUMAN	THLAPYSDELR	4.37	-0.213	-0.9	0.3736	0.81	0.3736	3.99079	4.10911	3.85009	3.88607	4.51528	4.38712	2.81234	2.69569	4.49517	4.55658	5.2006	5.30437	5.0062	4.9534	4.61849	4.811	3.78402	3.60167	4.356	4.33904	5.22759	5.10511	4.647	4.37973	4.89363	4.91786	5.637	5.428	3.8254	3.8026	5.25923	5.32432	3.33178	3.41188	4.208	4.23218	4.04638	4.28658	3.74569	3.82371
APOA1_HUMAN	ETEGLRQEMSK	3.25	0.041	0.18	0.85893	0.03	0.85893	2.56509	2.67164	2.45695	2.64142	3.27648	3.14599	2.74638	2.51069	3.55059	3.24461	3.61867	4.13349	3.56568	3.7453	3.60308	3.75012	3.39886	3.30534	3.63666	3.83401	3.70966	4.01067	3.47236	3.64251	3.36055	3.52842	4.34204	4.66829	2.4465	2.54724	3.70119	3.94765	2.2383	2.49686	2.83988	2.98051	2.60121	2.74419	2.5309	2.76745
APOA1_HUMAN	VSFLSALEEYTK	6.36	-0.202	-0.87	0.39172	0.75	0.39172	5.91375	6.20991	5.83937	6.07016	6.36232	6.37337	5.56631	5.69874	6.67883	6.57225	7.15545	7.33636	6.79053	6.81099	6.4797	6.53622	5.262	5.10101	6.09767	6.3234	7.19217	7.13068	6.55788	6.76164	6.56317	6.79736	7.48452	7.75444	5.74808	5.77214	7.17977	7.1784	5.5801	5.72802	6.27046	6.09433	5.80051	6.15999	5.48562	5.97551
APOA1_HUMAN	DYVSQFEGSALGK	5.9	0.099	0.46	0.64824	0.21	0.64824	5.6507	5.82256	4.98719	5.22133	6.01726	6.10797	5.18213	5.53015	6.23271	5.84613	6.59724	6.60333	6.25128	6.44463	6.10879	6.22448	5.88929	6.11398	5.99833	6.20299	6.37526	6.54878	5.92343	6.31016	6.0068	6.10554	6.75581	7.02475	4.8673	4.93605	6.58242	6.5435	5.0606	5.2244	5.49394	5.40699	5.19724	5.35156	5.5295	5.81421
APOA1_HUMAN	KWQEEMELYR	4.27	-0.163	-0.71	0.48358	0.5	0.48358	4.00299	3.64129	3.86795	3.77139	4.10575	3.79492	3.83957	3.81628	4.25968	4.14684	5.17753	5.10708	4.63109	4.53505	4.56964	4.57038	3.48046	3.06789	4.60743	4.6816	5.03078	4.86191	4.48756	4.54503	4.60071	4.30381	5.86144	5.6551	3.55109	3.44791	5.17126	5.06496	3.53243	3.46242	4.01873	3.91297	3.82411	4.04761	3.76998	3.77786
APOA1_HUMAN	VKDLATVYVDVLK	-0.71	0.115	0.13	0.90086	0.02	0.90086	-2.15362	-1.39209	-1.96511	-1.95684	-1.37162	3.50933	-2.41663	-2.03263	-0.95991	-1.23285	-0.30265	-0.08821	0.00901	0.01516	-0.81791	-0.39737	-2.17861	3.48745	-0.670125	-0.04616	0.489125	0.223925	-0.53951	-0.36361	-0.81396	-0.32316	0.91489	0.927275	-2.21206	-2.01046	0.22485	0.253815	-2.18565	-1.45104	-1.59516	-1.63639	-1.79435	-1.7946	-0.58214	-1.00106
APOA1_HUMAN	VEPLRAELQEGAR	4.39	0.016	0.08	0.93563	0.01	0.93563	3.53589	3.8676	3.8942	4.02151	4.608	4.67883	4.13327	3.94766	4.47797	4.53763	4.82745	5.03812	4.77764	4.808	4.35079	4.34087	4.49849	4.46745	4.49744	4.71168	5.02573	4.8522	4.61681	4.46931	4.68079	4.83716	5.30315	5.49505	3.77726	3.8258	4.69746	5.18325	3.38474	3.59782	4.26092	4.22646	3.97152	3.93647	3.78514	3.77414
APOA1_HUMAN	VSFLSALEEYTKK	-0.35	-0.186	-0.63	0.53653	0.39	0.53653	NA	NA	-0.93064	NA	-0.09408	0.18645	-0.87341	-0.732115	-0.66402	-0.42435	0.03007	-0.19513	-0.35153	-0.86664	NA	NA	-0.75086	-1.02025	-0.510965	NA	0.569165	0.243125	-0.04105	0.17936	-0.37914	-0.51598	0.94741	1.22501	-1.09848	NA	-0.32597	-0.155335	-1.47092	NA	NA	NA	NA	-1.34948	NA	NA
APOA1_HUMAN	THLAPYSDELRQR	-1.85	-0.2	-0.45	0.66347	0.21	0.66347	NA	NA	NA	NA	-1.85037	NA	NA	NA	NA	NA	NA	NA	NA	NA	NA	NA	NA	NA	-2.12268	NA	-2.0808	NA	-1.54988	NA	NA	NA	-1.6577	-1.81083	NA	NA	NA	NA	NA	NA	NA	NA	NA	NA	NA	NA
APOA1_HUMAN	LLDNWDSVTSTFSK	6.3	-0.059	-0.26	0.79388	0.07	0.79388	6.00076	6.07475	6.44779	5.73577	6.34236	6.21041	5.45093	5.73332	6.36194	6.27861	6.92678	7.11952	6.62573	6.6528	6.44137	6.54517	5.87994	5.91791	6.26476	6.48756	6.85046	6.88401	6.15703	6.40436	6.53164	6.43555	7.32148	7.60792	5.41937	5.62505	7.03498	6.98116	5.51171	5.62066	6.06139	5.95977	6.60557	5.83254	5.91551	5.91814
APOA1_HUMAN	DSGRDYVSQFEGSALGK	4.47	0.011	0.06	0.95566	0	0.95566	3.98974	4.09994	3.68243	3.88986	4.58509	4.54899	3.98308	4.24376	4.52459	4.39053	4.97954	5.0289	4.74602	4.76118	4.33778	4.38275	4.75389	4.89954	4.68168	4.94991	4.90989	5.03322	4.40898	4.89945	4.44001	4.62863	5.59802	5.69409	3.68933	3.64444	5.09885	5.09006	3.59806	3.68782	4.20714	4.20658	3.86625	4.13571	4.13246	4.26741
APOA1_HUMAN	EQLGPVTQEFWDNLEK	5.02	-0.131	-0.56	0.57709	0.32	0.57709	4.75408	4.8919	4.38854	4.53338	4.90902	4.92536	4.21782	4.23813	5.19447	5.09476	6.01334	6.17224	5.58129	5.42054	5.28677	5.38394	4.00392	3.67961	5.1826	5.31331	5.69904	5.66657	4.99023	5.14024	5.37096	5.30352	6.12272	6.3838	4.21508	4.27843	5.90179	5.76333	4.42776	4.48982	4.87168	4.70019	4.49001	4.81802	4.31209	4.86893
APOA1_HUMAN	LREQLGPVTQEFWDNLEK	5.95	-0.276	-1.08	0.28757	1.16	0.28757	5.2125	5.74944	5.45371	5.65862	5.82567	5.73664	5.20005	5.38059	6.17934	6.05279	7.02119	7.11359	6.39733	6.42532	6.03731	6.27634	4.5287	3.98882	5.91564	6.17089	6.49505	6.43891	6.06821	6.13129	6.24757	6.01029	7.31984	7.67598	5.4317	5.53474	6.73999	6.81881	5.39029	5.3907	6.04569	5.92359	5.51253	5.6487	5.32711	5.69679
APOA1_HUMAN	AKPALEDLRQGLLPVLESFK	-2.55	-0.878	-2.12	0.04325	4.51	0.04325	NA	-3.05737	NA	-4.37329	-2.40046	-2.20093	-2.85603	-3.11612	-1.97177	-1.92229	-3.69533	NA	-3.6286	NA	-2.32807	-2.36393	NA	NA	-3.10011	-3.76081	-1.53662	-2.49783	-1.85658	-2.09668	-2.57113	-2.19733	-0.42538	-0.432125	NA	NA	-2.84869	-3.13313	NA	NA	-3.40351	NA	NA	NA	NA	NA
APOA1_HUMAN	EQLGPVTQEFWDNLEKETEGLR	0.73	-0.568	-1.58	0.1213	2.5	0.1213	-0.23559	-0.36805	0.59622	0.50436	0.10741	-0.14569	-0.30314	0.104435	0.74854	0.59433	1.83695	2.01141	1.83117	1.52809	0.54794	0.77763	-1.95652	NA	0.451915	0.6506	1.1161	0.812185	0.95775	0.87821	0.42284	0.8803	2.90455	3.1475	0.07587	0.38614	2.19813	1.90288	0.18923	0.093215	1.28322	1.28304	0.082715	0.8231	-0.5875	0.250525
APOA1_HUMAN	LREQLGPVTQEFWDNLEKETEGLR	2.11	-0.631	-1.66	0.10538	2.74	0.10538	1.28727	1.29081	2.14209	2.14241	1.68978	1.69485	1.44505	1.54727	2.21256	2.16773	3.07622	3.23587	2.99122	2.75524	1.97895	1.97848	-2.22192	NA	2.1755	2.05897	2.57746	2.27482	2.19207	2.41411	2.01957	1.96355	4.16687	4.37301	1.62652	1.50245	3.1584	3.29934	1.52889	1.40419	2.90118	2.58111	1.7383	2.03846	1.19718	1.77503
APOA1_HUMAN	EQLGPVTQEFWDNLEKETEGLRQEMSK	1.72	-0.311	-1.21	0.23171	1.48	0.23171	0.79804	0.4845	1.61723	1.76487	0.79422	0.73947	0.79883	1.18064	1.83363	1.5369	2.50654	2.58668	2.33799	2.22395	1.39084	1.54575	NA	NA	1.84152	1.94526	2.07497	2.1254	1.48397	1.8389	1.52699	1.63111	3.28125	3.6328	1.39755	1.38881	2.59995	2.63545	0.93017	0.871915	2.20029	2.1023	1.11014	1.55588	1.31734	1.55164
APOA2_HUMAN	EQLTPLIK	5.14	0.219	1.11	0.27457	1.23	0.27457	4.76814	4.82197	4.26659	4.6567	5.44298	5.51829	4.646	4.83178	5.16601	5.04983	5.69646	5.72393	5.40547	5.50364	5.52832	5.47537	5.23803	5.53122	5.75805	6.02757	5.56998	5.64616	4.92465	5.19632	4.96493	4.99792	5.86198	5.84462	4.37966	4.36799	5.90426	5.89347	4.14127	4.18541	4.39729	4.26016	4.90742	4.86381	5.11271	5.25774
APOA2_HUMAN	SPELQAEAK	2.56	0.38	1.47	0.14829	2.17	0.14829	1.48116	1.83563	1.99864	2.13568	3.02682	3.03558	2.32431	2.13176	2.80769	2.4598	3.08061	3.69127	2.82122	3.18156	3.30247	2.97281	2.70323	3.21635	3.23725	3.61923	2.3956	2.75562	2.54709	2.70189	1.84391	2.10421	3.59768	3.67568	1.59181	1.67672	3.24829	3.44505	1.50026	1.70259	1.82975	1.95363	2.65521	2.22387	1.90912	2.11074
APOA2_HUMAN	SKEQLTPLIK	2.32	0.129	0.6	0.55425	0.36	0.55425	1.74916	1.99089	1.39716	1.73018	2.49439	2.46245	2.1582	1.79462	1.81164	2.00208	3.03773	3.19808	2.95969	2.97264	2.63716	2.64659	2.60056	2.3668	2.74977	2.83082	2.61695	2.5454	2.14271	1.76035	2.34716	2.53151	3.26526	3.12793	1.35756	1.44656	2.9796	3.27758	1.07418	1.28903	2.13031	2.17579	2.24907	2.30763	2.22086	2.17046
APOA2_HUMAN	VKSPELQAEAK	2.61	0.287	1.26	0.21546	1.58	0.21546	1.9166	2.3153	2.08252	2.11326	2.80312	2.64097	2.46093	2.61332	2.635	2.3595	3.14773	3.55352	2.96507	3.13973	2.8206	3.23599	2.76261	2.89668	3.22928	3.45701	2.73888	2.98026	2.32146	2.5889	2.33267	2.5156	3.64762	3.79418	1.6367	1.60003	3.30755	3.4246	1.29413	1.49032	2.05926	2.07033	2.35764	2.43464	2.18752	2.62
APOA2_HUMAN	SKEQLTPLIKK	-5.14	0.84	0.89	0.43007	0.8	0.43007	NA	NA	NA	NA	NA	NA	NA	NA	NA	NA	NA	NA	-4.72094	NA	NA	NA	NA	NA	NA	NA	NA	NA	NA	NA	NA	-5.56106	NA	NA	NA	NA	NA	NA	NA	NA	NA	NA	NA	NA	NA	NA
APOA2_HUMAN	EPCVESLVSQYFQTVTDYGK	6.03	-0.13	-0.38	0.70851	0.14	0.70851	5.39098	5.7199	5.90505	6.04961	5.43865	5.50115	5.63769	5.886	6.1889	6.12546	7.14295	7.23742	6.5651	6.74615	6.5868	6.8231	4.6064	2.87003	6.22853	6.62834	6.08882	6.13861	5.43755	5.69267	5.76255	5.87153	7.26012	7.62697	5.30781	5.4898	6.95487	7.07914	5.30424	5.41322	5.56434	5.78124	5.93318	6.40113	6.21442	6.55647
APOA4_HUMAN	EAVEHLQK	-1.57	-0.586	-0.66	0.51546	0.43	0.51546	NA	NA	-0.56392	-0.65098	-2.21361	-2.44685	NA	-3.12174	-2.54225	-1.2924	-0.45043	0.33524	-0.50912	-1.56519	-2.74995	-2.78414	-3.60106	-2.85459	0.954075	-4.36278	-3.35267	-2.50083	-2.50461	-2.12969	-3.02542	-2.59057	1.02431	0.887995	NA	NA	-1.20639	-1.00236	NA	NA	-0.7834	-0.70814	-0.353975	NA	-0.88944	-0.594505
APOA4_HUMAN	ISASAEELR	2.55	0.077	0.4	0.68845	0.16	0.68845	1.70323	2.13614	2.14773	2.22836	3.18354	3.25895	2.5801	2.46048	2.21675	2.19137	2.39935	2.45215	2.7418	2.88181	2.81284	2.7465	3.04661	3.16685	2.629	2.78427	2.16114	2.2505	2.52317	2.74308	2.55034	2.72018	2.88238	3.48271	1.68045	1.64312	2.89973	3.04119	1.69941	1.84441	2.31514	2.34581	2.91127	2.62081	2.85326	3.05156
APOA4_HUMAN	LAPLAEDVR	3.56	0.049	0.29	0.77008	0.09	0.77008	3.17521	3.34664	3.17686	3.11347	4.09399	4.09562	3.40823	NA	3.13142	3.17775	3.40837	3.60068	3.7831	3.87576	3.84581	3.7434	3.88719	4.1034	3.50748	3.72176	3.43079	3.60381	3.42864	3.6511	NA	3.7807	3.70375	4.0674	2.74867	2.77068	3.71963	3.96152	2.76778	2.91283	3.27856	3.30645	3.74891	3.81621	4.08308	4.12995
APOA4_HUMAN	VNSFFSTFK	2.3	0.221	0.55	0.58429	0.3	0.58429	2.12391	2.30792	2.16208	2.34967	2.79036	2.7396	2.17893	2.40355	2.18701	1.95039	2.24047	2.19627	2.56853	2.68795	2.58336	2.6304	2.48248	2.69139	2.3218	2.70846	2.08209	2.29678	1.9628	2.41811	2.44418	2.53693	2.98222	3.13119	1.5814	1.62806	2.82279	2.86646	1.46258	1.58692	2.12994	2.05394	2.30082	2.48118	-0.0441	3.16277
APOA4_HUMAN	IDQNVEELK	2.43	0.139	0.58	0.56462	0.34	0.56462	1.68523	2.37454	1.78522	2.09432	3.07435	3.19334	2.47371	2.55114	1.98201	2.09858	2.07622	2.33236	2.31923	2.84399	2.79764	2.76235	2.90584	3.23361	2.52989	2.96545	2.10932	2.24159	2.40496	2.59459	2.35425	2.6902	2.70989	3.15648	1.23104	1.41992	2.56824	3.07063	1.34147	1.69352	2.08887	2.06405	2.8957	2.55229	2.99249	3.12382
APOA4_HUMAN	IDQTVEELR	0.48	0.082	0.32	0.75118	0.1	0.75118	-0.54929	0.4026	0.04924	0.64918	0.99724	1.23146	0.12367	-0.130045	0.11003	0.08281	0.44729	0.55559	0.63616	0.89706	0.77726	0.84579	0.83581	1.27734	0.487845	1.01171	0.213865	0.262525	0.4213	0.28227	0.43416	0.77164	NA	1.10613	-0.59717	-0.36875	0.59864	1.18749	-0.55362	-0.215145	0.26061	0.32058	0.871465	0.61013	1.12048	1.38488
APOA4_HUMAN	LEPYADQLR	2.96	-0.055	-0.19	0.84771	0.04	0.84771	NA	2.80817	2.52593	2.54587	3.4899	2.52255	NA	2.9061	2.73909	2.54526	2.7091	3.14255	3.20675	3.30992	3.33153	1.78334	3.22349	3.41092	2.97934	3.35601	2.70714	2.80267	2.97597	3.09917	3.12031	3.22635	3.34875	3.7801	NA	2.14944	3.19096	3.50106	2.06615	2.25232	2.64005	2.7719	3.24745	3.16806	3.4599	3.5644
APOA4_HUMAN	VEPYGENFNK	-0.09	0.074	0.36	0.7235	0.13	0.7235	-0.78558	-0.42569	-0.52815	-0.2401	0.55613	0.4742	-0.15652	-0.426925	NA	-0.53605	NA	-0.19163	0.20825	0.19492	NA	0.16407	0.2278	0.44231	-0.042155	0.30029	-0.185835	-0.233195	-0.19966	-0.42063	-0.10138	-0.01391	0.46266	0.710755	NA	NA	0.33542	0.508885	-1.49184	-1.19619	-0.6074	-0.67084	-0.031745	0.0196	0.2258	0.412645
APOA4_HUMAN	ALVQQMEQLR	3.78	0.003	0.02	0.98615	0	0.98615	3.53669	3.7143	3.47228	3.64188	3.95415	4.09315	3.4904	3.74464	3.51529	3.26083	3.60056	3.78559	3.88453	4.0661	3.86666	3.96289	4.03592	4.35209	3.6709	4.00091	3.58899	3.81677	3.30075	3.96287	3.88279	4.01587	4.40045	4.41184	2.99606	3.05159	4.086	4.09882	2.8448	3.1462	3.60662	3.6297	3.90179	3.91802	4.39835	4.52691
APOA4_HUMAN	LLPHANEVSQK	0.83	0.06	0.31	0.76147	0.09	0.76147	0.73629	0.40698	0.73368	0.57754	1.01922	0.80879	0.87926	0.952605	0.44781	0.15451	0.75099	1.07285	1.22929	1.06337	1.07449	1.27916	1.18724	0.96638	0.932365	0.87311	0.743655	0.624455	0.35298	0.6049	1.14384	0.95617	1.43475	1.69884	-0.03517	-0.18538	1.28483	1.09936	-0.19142	-0.004005	0.7625	0.57816	0.776355	1.23792	1.49305	1.5778
APOA4_HUMAN	IDQTVEELRR	1.41	-0.055	-0.26	0.79327	0.07	0.79327	0.8874	1.17581	1.17192	1.35906	1.806	1.55313	1.51502	1.44518	0.66585	0.90009	1.195	1.42912	1.48678	1.75289	1.30849	1.70152	1.82264	1.62312	1.3577	1.56247	1.30367	1.3136	NA	NA	1.49643	1.83595	2.11448	2.40481	0.58237	0.54415	1.71752	1.90261	0.27308	0.597455	1.32457	1.32423	1.52916	1.79389	1.78326	2.09124
APOA4_HUMAN	TQVNTQAEQLR	1.48	0.276	1.11	0.27464	1.23	0.27464	-0.52793	0.21625	1.24836	1.42773	2.12135	2.174	1.76746	1.7528	1.71213	1.13009	1.55368	2.12938	1.7491	2.08033	2.02131	1.78517	1.99899	2.31398	1.6199	2.04966	1.1439	1.49379	1.53195	1.83745	1.37714	1.62485	1.64162	1.80105	0.724	0.75631	1.08794	1.27537	0.81477	1.01704	1.30185	1.48468	1.19894	0.86846	1.77006	2.05925
APOA4_HUMAN	LVPFATELHER	1.25	0.133	0.42	0.6796	0.17	0.6796	1.10121	1.25665	-0.43755	-0.35138	1.86924	1.91362	0.53691	1.09457	1.39413	1.17637	2.0655	2.43979	2.04259	2.1831	1.50044	1.72731	1.37477	1.88959	0.489135	1.04169	1.48267	1.76124	1.29636	1.722	1.63856	1.90924	2.39077	2.45745	-0.23722	-0.41194	2.48237	2.56475	-0.36033	0.349545	0.68839	0.63755	1.02631	1.0941	0.31694	0.829805
APOA4_HUMAN	DKVNSFFSTFK	0.71	-0.073	-0.29	0.77186	0.09	0.77186	0.54654	0.27914	0.87391	0.20652	1.13025	0.96455	0.51426	0.742395	-0.01972	0.00257	0.88426	0.714	1.27911	0.95523	0.57875	0.91335	1.01172	0.84247	0.594885	0.45101	0.492605	0.559375	0.37727	0.75259	1.19722	0.73454	1.99147	1.62691	-0.30287	-0.6507	1.76796	1.17829	-0.5355	-0.358665	0.78753	0.70503	0.745795	1.0274	1.52815	1.29455
APOA4_HUMAN	SLAPYAQDTQEK	2.55	0.176	0.6	0.55223	0.36	0.55223	1.5299	2.70325	1.83669	2.24205	3.26362	3.44994	2.55224	2.94618	2.33364	2.16193	2.14608	2.55206	2.41124	2.88963	2.85961	2.76774	3.09275	3.49673	2.50686	3.03661	1.94091	2.30793	2.45629	2.91453	2.25076	2.99711	3.07426	3.51829	1.4608	1.40479	2.77108	3.07747	1.49915	1.68464	2.04361	2.24291	2.89893	2.48657	2.90558	3.32748
APOA4_HUMAN	RVEPYGENFNK	1.71	0.114	0.42	0.6798	0.17	0.6798	1.04111	1.73317	NA	0.4028	2.53011	2.50389	1.91927	2.20968	1.14376	1.06471	1.30332	1.29669	1.8726	2.21452	1.83152	2.27886	2.28926	2.43531	1.81703	2.3025	1.33739	1.67484	1.64452	2.0312	1.73856	2.14877	2.2353	2.57039	0.27143	0.07394	2.30973	2.33643	0.43749	0.658785	1.23744	1.15959	2.00972	2.02443	2.3255	2.32022
APOA4_HUMAN	LGEVNTYAGDLQK	3.78	0.065	0.33	0.74241	0.11	0.74241	3.37387	3.48488	3.35273	3.68989	4.05265	4.18833	3.68158	3.79508	3.61315	3.39802	3.61478	3.98753	3.89226	4.07753	3.87699	3.91493	4.03654	4.29317	3.80168	4.15621	3.49917	3.72345	3.47008	3.92854	3.59955	3.93892	4.43153	4.6712	2.9701	2.93758	4.03775	4.31311	2.84343	3.05991	3.64356	3.39007	3.90415	3.77248	4.27062	4.57411
APOA4_HUMAN	KLVPFATELHER	2.51	-0.014	-0.08	0.9389	0.01	0.9389	2.4583	2.12579	2.07356	2.3366	2.62282	2.68885	2.75835	2.75883	2.11992	1.86752	2.51036	2.67338	2.71875	2.67776	2.64406	2.49135	2.64693	2.76856	2.50047	2.56434	2.1929	2.32957	2.17922	2.4568	2.55638	2.4995	3.62787	3.60218	1.74522	1.67435	3.10157	2.93732	1.50419	1.5072	2.64696	2.39845	2.62962	2.71455	2.98375	2.99821
APOA4_HUMAN	TQVNTQAEQLRR	0.49	0.427	1.45	0.15586	2.1	0.15586	-0.60162	-1.67839	-0.00089	0.28705	1.4763	1.55224	1.18364	1.08129	0.53414	0.16308	0.43522	0.86955	0.6215	0.98057	1.22314	0.64984	1.49657	1.67345	0.537135	0.84718	0.081535	0.225445	0.51194	0.60077	0.41149	0.54293	0.49633	0.738985	-0.85948	-0.62114	NA	0.187335	NA	NA	0.34598	0.59263	NA	-0.41284	0.87693	0.695565
APOA4_HUMAN	LNHQLEGLTFQMK	3.54	-0.048	-0.29	0.77354	0.08	0.77354	3.24794	3.22134	3.52049	3.66699	3.47449	3.43582	3.41598	3.52774	3.231	3.07882	3.66649	3.92917	3.58923	3.71363	3.63864	3.72853	3.42585	3.54	3.55863	3.734	3.3231	3.3943	3.21809	3.5968	3.55576	3.56908	4.71297	4.52034	2.8551	2.90392	3.77724	3.88116	2.60319	2.77107	3.4922	3.41887	3.72582	3.7978	4.02208	4.17077
APOA4_HUMAN	LKEEIGKELEELR	1.81	-0.049	-0.21	0.83578	0.04	0.83578	1.53546	1.58176	1.36477	1.61098	1.93639	2.15882	1.93212	2.29109	1.32151	1.24958	1.55399	2.03435	1.82624	2.18391	1.74209	1.859	1.92642	2.04914	1.62668	1.85466	1.45314	NA	1.56909	1.84356	1.89455	2.09065	2.99492	3.21237	0.82329	0.94051	2.26612	2.3798	0.25139	0.960055	2.01856	1.81506	1.79628	2.15678	2.21134	2.41312
APOA4_HUMAN	SELTQQLNALFQDK	3.66	-0.055	-0.28	0.78289	0.08	0.78289	3.47361	3.81171	3.11589	3.54559	3.82023	4.05355	3.34272	3.51354	3.35552	3.20892	3.71148	3.96307	3.85381	3.93461	3.73617	3.81874	3.57977	3.37897	3.49532	3.87607	3.48223	3.49582	3.21832	3.53423	3.91102	3.95252	4.50458	4.74637	2.82429	2.93913	4.13456	4.13239	2.90368	2.98834	3.58248	3.41546	3.5597	3.89124	3.96034	4.50582
APOA4_HUMAN	LGPHAGDVEGHLSFLEK	2.91	-0.011	-0.06	0.95486	0	0.95486	2.59016	2.72983	2.53116	2.68488	3.1529	3.28805	2.83503	3.12053	2.58	2.36971	2.91268	3.19325	2.95391	3.03107	2.9922	3.06028	3.0239	3.06939	2.87448	3.16185	2.74382	2.79875	2.5658	3.04523	2.93994	3.00064	3.97522	3.97334	2.11311	2.02776	3.31443	3.38223	1.75767	2.00798	2.81947	2.81525	2.94165	3.16874	3.3855	3.59374
APOA4_HUMAN	SLAELGGHLDQQVEEFR	3.76	0.015	0.08	0.93454	0.01	0.93454	3.69473	3.81781	3.44312	3.44514	3.95659	3.9296	3.7029	4.12242	3.51545	3.25337	3.88534	3.95617	4.03863	4.16277	3.85632	3.98806	3.41267	3.59102	3.62927	3.92967	3.6016	3.80547	3.24769	3.70315	3.91918	4.15328	4.45718	4.77586	2.95614	2.96547	4.1827	4.14565	2.9341	3.15422	3.66855	3.50201	3.57172	3.9319	4.2927	4.05502
APOA4_HUMAN	ENADSLQASLRPHADELK	3.64	0.085	0.43	0.66857	0.19	0.66857	3.38179	3.18604	3.00614	3.35391	3.91396	4.09949	3.88296	3.91234	3.34917	NA	3.70787	3.80297	3.50293	3.72875	3.75725	3.69226	3.94396	4.09432	3.57798	3.78647	3.38736	3.52635	3.31677	3.73492	3.41219	3.72582	4.40577	4.52599	2.64111	2.49173	3.90115	3.98163	NA	2.6349	3.59514	3.56837	3.95704	3.51228	4.05714	4.21117
APOA4_HUMAN	SLAELGGHLDQQVEEFRR	3.29	-0.098	-0.55	0.58481	0.3	0.58481	3.05548	3.09198	2.98255	3.27657	3.57292	3.52352	3.35283	3.56908	2.96608	2.77709	3.46637	3.11441	3.57333	3.54001	3.35809	3.39076	2.90754	2.88983	3.17047	3.17838	3.01528	3.05214	2.87559	3.22548	3.54301	3.40098	4.30076	4.51617	2.52075	2.49347	3.8326	3.77894	2.37057	2.48603	3.40429	3.39385	3.45247	3.53924	3.77262	3.74356
APOA4_HUMAN	TLSLPELEQQQEQQQEQQQEQVQMLAPLES	2.44	-0.624	-1.83	0.07629	3.33	0.07629	1.04469	1.94541	1.21113	2.08081	2.50744	2.87514	2.87325	3.12325	1.63388	1.74264	NA	NA	1.88436	1.96533	3.25875	3.40136	1.81758	1.2016	1.96381	2.04398	1.41848	1.63295	2.61271	2.48934	3.12898	3.12796	3.39163	4.11303	NA	NA	3.34583	3.71572	2.68842	2.55231	1.86894	1.97323	2.87993	3.33423	NA	NA
APOB_HUMAN	ATGVLYDYVNK	-0.76	NA	NA	NA	NA	NA	NA	NA	NA	NA	NA	NA	NA	NA	NA	-0.75875	NA	NA	NA	NA	NA	NA	NA	NA	NA	NA	NA	NA	NA	NA	NA	NA	NA	NA	NA	NA	NA	NA	NA	NA	NA	NA	NA	NA	NA	NA
APOB_HUMAN	AVSMPSFSILGSDVR	-1.13	NA	NA	NA	NA	NA	NA	NA	NA	NA	NA	NA	NA	NA	-1.09403	-1.16621	NA	NA	NA	NA	NA	NA	NA	NA	NA	NA	NA	NA	NA	NA	NA	NA	NA	NA	NA	NA	NA	NA	NA	NA	NA	NA	NA	NA	NA	NA
APOB_HUMAN	SVSDGIAALDLNAVANK	-0.96	NA	NA	NA	NA	NA	NA	NA	NA	NA	NA	NA	NA	NA	-0.96332	NA	NA	NA	NA	NA	NA	NA	NA	NA	NA	NA	NA	NA	NA	NA	NA	NA	NA	NA	NA	NA	NA	NA	NA	NA	NA	NA	NA	NA	NA	NA
APOB_HUMAN	FSVPAGIVIPSFQALTAR	-3.75	NA	NA	NA	NA	NA	NA	NA	NA	NA	NA	NA	NA	NA	-4.1564	-3.34769	NA	NA	NA	NA	NA	NA	NA	NA	NA	NA	NA	NA	NA	NA	NA	NA	NA	NA	NA	NA	NA	NA	NA	NA	NA	NA	NA	NA	NA	NA
APOB_HUMAN	VPSYTLILPSLELPVLHVPR	-1.41	NA	NA	NA	NA	NA	NA	NA	NA	NA	NA	NA	NA	NA	-1.26812	-1.55332	NA	NA	NA	NA	NA	NA	NA	NA	NA	NA	NA	NA	NA	NA	NA	NA	NA	NA	NA	NA	NA	NA	NA	NA	NA	NA	NA	NA	NA	NA
APOB_HUMAN	VNWEEEAASGLLTSLKDNVPK	-1.2	NA	NA	NA	NA	NA	NA	NA	NA	NA	NA	NA	NA	NA	-1.01033	-1.38655	NA	NA	NA	NA	NA	NA	NA	NA	NA	NA	NA	NA	NA	NA	NA	NA	NA	NA	NA	NA	NA	NA	NA	NA	NA	NA	NA	NA	NA	NA
APOB_HUMAN	IADFELPTIIVPEQTIEIPSIK	-1.17	NA	NA	NA	NA	NA	NA	NA	NA	NA	NA	NA	NA	NA	-0.96376	-1.38055	NA	NA	NA	NA	NA	NA	NA	NA	NA	NA	NA	NA	NA	NA	NA	NA	NA	NA	NA	NA	NA	NA	NA	NA	NA	NA	NA	NA	NA	NA
APOC1_HUMAN	EFGNTLEDK	0.47	-0.595	-0.95	0.35375	0.91	0.35375	NA	NA	NA	NA	0.61129	1.26264	NA	-1.01387	NA	NA	NA	-0.10894	NA	NA	NA	0.17438	NA	NA	NA	NA	0.609985	1.04164	0.45457	0.0512	0.48048	0.68841	-0.53688	1.09505	NA	NA	0.86061	1.39946	NA	NA	NA	NA	NA	NA	NA	NA
APOC1_HUMAN	EWFSETFQK	0.81	-0.153	-0.26	0.79898	0.07	0.79898	NA	NA	NA	NA	NA	NA	NA	NA	NA	NA	NA	1.01117	0.33068	0.3351	NA	NA	NA	NA	NA	NA	NA	1.42491	-0.3388	0.22509	0.983	0.84576	1.68468	1.66986	NA	-0.77168	1.59991	1.57157	NA	NA	NA	NA	NA	NA	NA	NA
APOC1_HUMAN	LKEFGNTLEDK	-0.66	-0.469	-1.18	0.24564	1.4	0.24564	NA	NA	-1.73063	-1.24593	-0.22181	-0.39163	-2.19819	NA	-0.99129	-0.69562	-0.21266	-0.00137	-0.76411	-0.7703	-1.48497	-0.90644	NA	NA	NA	NA	0.342965	0.286735	-1.28228	NA	0.15959	0.4518	0.7266	0.562615	-2.06307	-1.95277	0.60216	0.927125	NA	NA	-1.22204	-1.16507	-1.98883	-1.2839	NA	NA
APOC1_HUMAN	MREWFSETFQK	-0.19	-0.742	-1.83	0.07689	3.34	0.07689	-1.9992	NA	-0.94044	-0.63661	-0.29086	-0.67017	-1.79129	-1.1807	-0.16384	-0.41345	0.91918	0.95551	-0.41571	-0.35627	-0.62309	-0.44033	NA	NA	NA	NA	1.12828	0.862075	-0.54043	-0.29438	0.71801	0.52999	2.06465	1.79529	-1.56821	-1.61108	1.41957	1.38091	NA	NA	-0.43127	-0.94075	-1.2368	-1.20372	NA	NA
APOC2_HUMAN	TAAQNLYEK	-1.85	-0.786	-0.84	0.45779	0.7	0.45779	NA	NA	NA	NA	-2.24621	NA	NA	NA	NA	NA	NA	NA	NA	NA	NA	NA	NA	NA	NA	NA	NA	NA	NA	NA	NA	NA	NA	NA	NA	NA	NA	-1.46046	NA	NA	NA	NA	NA	NA	NA	NA
APOC2_HUMAN	ESLSSYWESAK	3.29	0.335	0.52	0.60887	0.27	0.60887	3.42724	3.90582	3.33034	3.51383	3.42954	3.49558	3.81524	4.10368	4.00809	3.81078	3.81234	3.88349	4.07592	4.4165	3.58889	3.60862	3.75967	4.02577	2.16784	-0.92062	-0.369755	0.703665	3.24071	-0.07902	3.35109	3.67821	3.41445	NA	3.56755	3.54398	3.7283	3.90735	3.42861	3.69744	3.84452	3.86138	4.43194	4.27634	3.26902	3.70169
APOC2_HUMAN	STAAMSTYTGIFTDQVLSVLK	-1.44	-0.672	-1.03	0.32349	1.06	0.32349	NA	NA	-2.78095	NA	NA	NA	NA	NA	NA	NA	-0.93787	-1.43762	NA	NA	NA	NA	NA	NA	NA	NA	-1.22043	-1.26293	NA	NA	-2.53628	-2.62842	NA	-0.922965	NA	NA	-0.47276	-0.177665	NA	NA	NA	NA	NA	NA	NA	NA
APOC3_HUMAN	GWVTDGFSSLK	-0.11	-0.395	-0.8	0.42965	0.64	0.42965	-2.56757	-2.15396	-0.00345	0.36165	1.0074	0.89224	-2.08661	-1.23374	0.65777	0.18911	1.60953	1.5376	0.15475	0.38722	-0.98069	-1.22059	NA	-0.1532	-1.70772	-1.56017	1.55068	1.72788	-1.1008	-0.53366	0.4989	0.51555	2.55091	2.945	0.07967	0.1619	1.82866	1.91993	-1.87022	-1.42745	0.10402	0.03268	-2.22341	-1.92017	-2.19082	NA
APOC3_HUMAN	DALSSVQESQVAQQAR	0.89	-0.074	-0.17	0.86308	0.03	0.86308	NA	NA	0.36694	0.60539	1.79604	1.9001	-0.25609	-0.083585	1.54947	1.1059	2.16696	2.58076	0.79967	0.71317	-0.69247	-0.4732	0.70925	1.38723	-0.278675	0.23807	1.81384	2.04302	-0.59386	0.20692	0.97188	1.54422	2.98302	3.36901	0.67062	0.59648	2.25318	2.39796	-0.71427	-0.639935	1.12399	0.98245	NA	-1.19556	NA	0.037035
APOD_HUMAN	IPTTFENGR	6.07	-0.131	-0.75	0.45773	0.56	0.45773	6.01833	6.43792	5.56977	5.53012	6.17139	6.18262	6.10201	5.76898	5.84625	5.87715	5.93054	5.96617	5.80986	5.93429	6.06442	6.07378	5.97158	6.17939	6.15003	6.49735	6.09945	6.13473	6.2132	6.06241	6.99178	7.15933	5.88276	5.84988	6.12251	6.15767	5.57738	5.99435	5.66164	5.7522	5.5259	5.41513	6.28813	5.94962	6.8932	6.97841
APOD_HUMAN	NILTSNNIDVK	6.41	-0.099	-0.57	0.57161	0.33	0.57161	6.60439	6.91579	5.81444	6.07149	6.29381	6.46053	6.51511	6.48959	6.40081	6.31983	6.27568	6.32119	6.03864	6.26551	6.53109	6.28081	6.02227	6.37656	6.5163	6.76243	6.29382	6.48269	6.37791	6.68065	6.97245	7.23967	6.47563	6.59661	6.41317	6.41717	6.23	6.29605	5.97468	6.19972	5.79445	5.81995	6.41428	6.16521	6.97729	7.4306
APOD_HUMAN	MTVTDQVNCPK	4.52	-0.066	-0.31	0.76114	0.09	0.76114	4.28307	4.84321	3.76281	4.1199	4.50865	4.64787	4.7321	4.67141	4.47098	4.47765	4.1253	4.27447	4.03422	4.38049	4.68067	4.55442	4.35501	4.57802	4.86088	5.28257	4.41951	4.55126	4.78679	4.90755	5.25332	5.54884	3.9688	4.69601	4.57801	4.69051	4.00078	4.45761	4.07088	4.32965	3.58022	3.7756	4.4372	4.27435	5.209	5.43377
APOD_HUMAN	KMTVTDQVNCPK	3.92	-0.135	-0.77	0.44728	0.59	0.44728	4.05604	3.88796	3.26649	3.35985	3.53442	3.49516	4.31921	4.35431	3.90453	3.70689	3.69702	4.17507	3.49806	3.71556	4.05378	3.94487	3.67226	3.7516	4.12972	4.4572	3.75734	3.85265	4.20438	4.34869	4.80358	4.82733	4.00582	4.25572	3.98414	4.0317	3.42631	3.69611	3.44916	3.64527	3.27255	3.29067	3.88416	3.75869	4.47008	4.7184
APOD_HUMAN	NPNLPPETVDSLK	5.51	-0.041	-0.2	0.83927	0.04	0.83927	5.92776	6.06443	4.33294	5.20583	5.40106	5.50313	5.63962	5.86604	5.6261	5.45566	5.38044	5.53505	5.18302	5.39032	5.52483	5.50535	5.19292	5.55477	5.59724	5.85251	5.22042	5.45411	5.38856	5.80929	6.22661	6.35971	5.53585	5.43954	5.57725	5.52887	5.22202	5.32048	5.16479	5.26466	4.90194	4.71226	5.54732	5.3418	6.13767	6.40308
APOD_HUMAN	CPNPPVQENFDVNK	2.72	-0.065	-0.31	0.76068	0.09	0.76068	2.94963	3.33982	1.80774	2.04284	2.66727	2.78099	2.95209	3.02077	2.56274	2.43006	2.42157	2.78172	2.21576	2.40639	2.8434	2.70129	2.48917	2.80868	2.98477	3.47421	2.52638	2.74885	2.91515	3.13899	3.68073	3.79447	2.56897	2.92424	2.53431	2.76745	2.39311	2.61634	2.15174	2.4141	1.70381	1.83089	2.45886	2.3532	3.62309	3.84585
APOD_HUMAN	WYEIEKIPTTFENGR	-1.44	0.231	0.38	0.71071	0.14	0.71071	NA	NA	NA	NA	NA	NA	-0.38554	0.229805	0.34348	-0.18646	NA	-3.21065	NA	-2.21941	-2.6177	-2.07411	NA	NA	NA	NA	NA	NA	-2.0177	-1.87309	-0.31219	-0.46684	-1.85431	-1.54202	-1.88144	NA	NA	NA	NA	NA	NA	NA	NA	NA	NA	-2.92164
APOE_HUMAN	QWAGLVEK	4.36	0.216	1.27	0.20943	1.63	0.20943	4.05208	3.79195	5.60299	5.68921	4.93769	4.81576	4.40447	4.4455	4.70158	4.49315	4.55426	4.6656	4.60183	4.44671	4.61629	4.56996	3.4558	3.52493	3.98915	4.08549	4.61041	4.68738	4.40963	4.48531	4.0841	4.06759	4.17673	4.11608	4.54804	4.57886	4.24634	4.13213	4.31265	4.3137	4.37881	4.24007	4.35968	4.33295	3.50525	3.54285
APOE_HUMAN	ALMDETMK	4.08	0.178	0.78	0.44002	0.61	0.44002	3.45043	3.53119	4.55855	4.58874	4.36735	4.41987	3.96651	2.89371	4.37755	4.25093	4.03803	3.8786	4.34006	4.39634	4.31458	4.27508	4.15761	4.12777	4.61379	4.77413	4.36252	4.26068	4.21371	3.24139	3.97397	3.94124	3.36089	3.16031	4.48176	4.4954	3.42273	3.78826	4.52815	4.58988	4.01232	3.99661	4.14131	4.06862	3.97411	3.74577
APOE_HUMAN	LAVYQAGAR	5.47	0.216	1.41	0.16599	1.99	0.16599	4.64199	4.91475	5.66127	5.62908	6.21143	6.20222	5.54391	5.44791	5.67061	5.72153	5.4867	5.44956	5.73016	5.8072	5.63586	5.67465	5.31079	5.33852	5.63507	5.74488	5.58465	5.55989	5.50145	5.618	4.511	4.58657	NA	NA	5.81348	5.71397	5.05934	5.16355	5.74054	5.87772	5.4517	5.3869	5.49632	5.3756	4.97552	5.01044
APOE_HUMAN	DADDLQKR	-5.66	2.089	2.98	0.01464	8.91	0.01464	NA	NA	NA	NA	-4.12818	NA	NA	-5.83094	NA	NA	NA	-4.27227	NA	-5.05967	NA	NA	NA	-5.72621	NA	NA	NA	NA	NA	-8.29935	NA	NA	NA	NA	-5.97062	-6.0121	NA	NA	NA	NA	NA	NA	NA	NA	NA	NA
APOE_HUMAN	LGPLVEQGR	5.51	0.214	1.26	0.21426	1.59	0.21426	4.74545	5.1337	5.65836	5.83496	6.2348	6.29758	5.63945	5.10963	5.67287	5.79194	5.5117	5.56154	5.84541	5.89738	5.68341	5.72007	5.30323	5.41484	5.55664	5.80818	5.69362	5.65789	5.49511	5.1887	5.43718	5.61158	4.68375	4.82167	5.81843	5.81985	4.91909	5.39724	5.72143	5.76039	5.45667	5.39378	5.5991	5.48665	5.0674	5.10654
APOE_HUMAN	LQAEAFQAR	4.99	0.129	0.75	0.45719	0.56	0.45719	4.32931	4.61863	5.25549	5.43402	5.68509	5.72752	5.19028	5.02135	5.3732	5.30477	5.10573	5.24471	5.33617	5.46016	5.28168	5.23163	4.03073	4.21952	4.53359	4.77308	5.21744	5.2977	5.11844	4.89064	4.89764	5.06597	4.41812	4.68114	5.38805	5.43837	4.68269	4.93332	4.90736	5.06846	5.01077	5.01346	5.1929	5.03282	4.10382	4.21568
APOE_HUMAN	RLAVYQAGAR	2.7	0.234	1.26	0.21564	1.58	0.21564	1.64369	2.10103	3.21238	3.18471	3.09236	3.01825	3.02788	2.97792	3.13664	2.98705	2.86474	3.29907	2.97714	3.16283	2.9102	2.93553	2.06582	2.12318	2.72865	2.75423	2.7407	2.83763	2.74122	2.83193	1.62979	1.77124	NA	NA	3.12835	3.14829	2.48252	2.49919	2.74121	2.91257	2.80233	2.79138	2.73798	2.74162	1.83797	1.9955
APOE_HUMAN	LEEQAQQIR	3.93	0.258	1.12	0.27116	1.24	0.27116	3.09637	3.58045	3.98878	4.31422	4.69917	4.82583	4.11345	4.26771	4.6475	4.32676	3.85299	4.43374	4.09908	4.46306	4.41444	4.20585	3.02794	3.43819	3.4284	3.88295	3.82707	4.17908	4.09209	4.41234	3.53282	3.76623	3.52575	3.8828	4.15779	4.23569	3.54518	3.92456	3.70884	4.00108	3.683	3.90686	4.08584	3.8324	2.60482	3.04645
APOE_HUMAN	TRDRLDEVK	-1.63	0.022	0.05	0.96336	0	0.96336	NA	-2.65716	NA	NA	NA	-1.65085	NA	-1.24079	-1.22613	-1.52715	NA	NA	-1.59098	-1.40783	NA	NA	NA	NA	NA	NA	NA	NA	NA	NA	NA	NA	NA	NA	NA	NA	-2.0043	NA	NA	NA	NA	-1.39178	NA	NA	NA	NA
APOE_HUMAN	LGADMEDVCGR	4.97	-0.503	-1.09	0.28357	1.18	0.28357	5.19247	5.46286	6.12518	6.53495	5.23689	5.32623	4.77667	4.35149	5.343	5.23193	4.83283	4.85894	4.94352	5.13097	0.78675	0.83292	4.44736	4.53275	4.99193	5.35886	4.98763	4.7061	6.02538	5.49738	5.80741	5.97866	5.27669	5.11517	1.05387	1.1567	5.39293	5.73217	6.13344	6.43781	5.84068	5.95131	5.96103	5.85139	5.64987	5.7968
APOE_HUMAN	QQTEWQSGQR	1.86	0.361	1.49	0.14677	2.21	0.14677	0.54806	0.87961	NA	2.53564	2.24256	2.42455	2.07066	2.18349	2.53193	2.16229	NA	2.1833	2.11128	NA	2.40291	2.17217	1.83151	NA	2.16933	2.50298	1.16841	1.6808	1.93343	2.18274	0.89982	1.04838	NA	1.77177	1.95273	NA	NA	1.77144	1.99904	2.45667	1.8705	1.9995	2.28408	NA	0.5491	1.14085
APOE_HUMAN	LDEVKEQVAEVR	2.18	0.147	0.72	0.47665	0.52	0.47665	1.28928	1.70208	2.4363	2.77734	2.88444	2.96492	2.56162	2.37255	2.40881	2.40064	2.33582	2.39874	2.47958	2.6689	2.26319	2.20243	1.46283	1.73832	1.61783	2.029	2.20081	2.24368	2.24255	1.91893	2.07578	2.34444	1.69699	2.17793	2.52132	2.66058	1.75826	2.11942	2.0399	2.35385	2.47071	2.55397	2.36068	2.15903	0.90855	1.25025
APOE_HUMAN	AATVGSLAGQPLQER	5.12	0.188	1.05	0.29837	1.11	0.29837	4.4125	4.57436	5.22785	5.52881	5.61476	5.68249	5.17818	5.41871	5.61385	5.42754	5.31615	5.61855	5.41219	5.61733	5.22728	5.23111	4.5145	4.88733	4.71594	5.14775	5.32606	5.6059	4.83767	5.23237	4.62922	4.9581	4.60415	4.73841	5.51545	5.4669	4.89832	4.96183	5.05196	5.19724	5.1254	5.07067	5.12819	5.10853	4.39894	4.7427
APOE_HUMAN	SWFEPLVEDMQR	5.45	-0.147	-0.56	0.57827	0.31	0.57827	5.17851	5.15972	6.17774	6.35041	5.59199	5.40253	5.28091	5.33467	5.84878	5.70374	6.01796	6.17689	6.00776	5.87413	5.72618	5.92916	3.21907	2.7169	4.88978	4.96047	5.72832	5.68335	5.27203	5.45817	5.48741	5.17152	5.48555	5.70143	6.20425	6.08939	5.57683	5.39543	5.63965	5.64717	5.89565	5.58509	5.46669	5.98555	4.29605	4.7131
APOE_HUMAN	VQAAVGTSAAPVPSDNH	3.58	0.23	0.93	0.35576	0.87	0.35576	2.68208	3.30959	3.90282	4.34308	4.13435	4.28608	4.06494	4.00481	4.1105	4.12066	3.47717	3.97271	3.48559	3.91247	3.93284	3.80349	2.66666	2.851	3.24864	3.62259	3.50361	3.83838	3.75545	4.00209	3.20252	3.54647	2.85875	3.6339	3.88382	4.00978	3.05208	3.61964	3.4332	3.68589	3.55966	3.7302	3.87794	3.62779	2.17708	2.32462
APOE_HUMAN	VEQAVETEPEPELR	3.91	0.362	2.07	0.04443	4.3	0.04443	3.53279	3.96484	3.99712	4.27399	4.66654	4.70735	4.25586	4.2004	4.31369	4.33113	3.56768	4.05013	3.91803	4.19666	4.1254	4.07164	3.47001	3.74397	4.08709	4.39801	3.88138	3.98506	3.79126	3.81914	3.65957	3.97196	3.14091	3.40366	4.04023	4.1973	3.22997	3.67275	3.84932	4.18056	3.55064	3.57864	3.77595	3.70072	3.48678	3.70989
APOE_HUMAN	GEVQAMLGQSTEELR	5.69	0.177	1.24	0.22141	1.54	0.22141	5.24571	5.4397	5.991	6.21806	5.87873	6.01396	5.5988	5.76994	6.01984	5.89226	5.79269	5.85838	5.74765	5.96585	5.80783	5.8229	5.26966	5.43651	5.74514	6.05716	5.80706	5.98236	5.46907	5.80021	5.43322	5.53342	5.26388	5.3107	5.98312	5.96747	5.21915	5.32108	5.75902	5.98313	5.6494	5.64119	5.62172	5.57157	5.21246	5.51175
APOE_HUMAN	DRLDEVKEQVAEVR	2.89	0.081	0.44	0.66469	0.19	0.66469	2.58836	2.55385	3.12457	3.33762	3.36152	3.47126	3.22649	3.52514	3.2223	3.11871	3.15748	3.11135	3.1582	3.32927	2.91774	3.01761	1.76928	1.94189	2.1189	2.57848	3.00345	3.12452	2.74748	3.15056	2.80956	2.86815	2.86104	3.08293	3.19425	3.2038	2.71721	2.7542	2.70077	2.87689	3.15591	3.18753	2.75981	3.01705	1.79789	2.00462
APOE_HUMAN	SELEEQLTPVAEETR	6.05	0.215	1.04	0.30614	1.07	0.30614	5.71758	5.87582	5.92978	6.19047	6.33895	6.47193	6.15595	6.23238	6.32548	6.2573	5.81809	6.04262	6.07155	6.28945	6.24545	6.05751	6.002	6.37078	6.2366	6.53699	5.8548	6.14767	5.65193	6.15017	5.78385	5.82787	5.29737	5.64213	6.93195	6.02081	6.36916	5.75892	6.00746	6.47806	5.79627	5.80056	5.8898	5.93391	5.58466	5.94142
APOE_HUMAN	LKSWFEPLVEDMQR	-1.44	0.506	1.12	0.27499	1.26	0.27499	NA	NA	NA	NA	-1.75666	NA	-1.44991	-1.83967	NA	NA	NA	NA	-0.97701	-1.25331	-1.4468	-0.7308	NA	NA	-0.718495	-0.6358	NA	NA	NA	NA	-2.45193	-2.90836	NA	NA	NA	-2.32631	NA	NA	0.39504	0.248485	-1.90597	NA	-2.25427	-2.18091	-1.77769	NA
APOE_HUMAN	WVQTLSEQVQEELLSSQVTQELR	5.66	-0.095	-0.32	0.74844	0.1	0.74844	4.65216	5.14594	6.50529	6.5138	5.21546	5.70276	5.14264	5.71024	6.22035	6.11285	6.10633	6.22411	6.13732	6.08077	5.81386	5.97509	4.3093	3.26364	5.54106	5.78078	5.57484	5.22002	5.1922	5.48287	4.92581	5.21033	5.75997	6.07062	6.21796	6.21753	5.40792	5.60546	6.2704	6.38739	6.01964	5.91373	5.6825	6.2058	4.90396	5.77881
APOH_HUMAN	TDASDVKPC	-1.09	0.054	0.15	0.87773	0.02	0.87773	-2.69949	-2.77531	-1.70019	-1.93177	-0.23522	-0.48452	-0.71469	-0.981095	-1.0511	-1.29748	-0.8593	-0.0195	-0.89512	-0.65	NA	-2.46235	0.08207	0.6486	-0.697335	-0.83015	-2.41282	-1.44463	-0.25246	-0.22822	-1.53832	-1.5904	0.10435	-0.143295	-2.10816	-1.96497	-0.33598	-0.243025	-1.52047	-1.47375	-1.41387	-1.35434	0.010185	-0.98065	-1.90854	-2.05376
APOH_HUMAN	ATVVYQGER	1.4	-0.012	-0.04	0.96552	0	0.96552	0.81887	1.10755	0.00289	1.19557	1.76782	1.89787	1.46339	1.49362	1.49907	1.25494	1.27929	1.77741	1.34572	1.71767	0.85071	0.14544	2.12826	2.61471	1.54977	1.9603	1.14731	1.50659	1.91638	2.20238	1.57018	1.7754	1.62092	1.85654	0.61524	0.71484	1.4246	1.83825	0.85913	1.24189	0.74416	1.1267	1.53401	1.24172	1.42633	1.74996
APOH_HUMAN	EHSSLAFWK	2.36	0.058	0.27	0.7916	0.07	0.7916	2.53169	2.53434	1.98899	1.88423	2.24844	1.94672	2.5485	2.66041	2.00092	1.88657	2.92776	3.09353	2.81729	2.71332	1.39766	1.60171	2.56331	2.65638	2.80233	2.70672	2.61146	2.51053	2.62704	2.72081	3.12244	2.91564	3.42587	3.33026	2.03245	1.95535	3.19546	2.88496	2.11124	2.23026	1.03052	0.96617	1.47317	1.59605	1.75384	NA
APOH_HUMAN	KATVVYQGER	-1.93	0.402	0.99	0.3482	0.99	0.3482	NA	NA	NA	NA	NA	NA	NA	-2.12703	NA	NA	NA	NA	NA	-2.04048	NA	NA	NA	-1.03938	NA	-1.82588	NA	-2.41608	-1.91822	NA	-2.14721	NA	NA	NA	NA	NA	NA	NA	NA	NA	NA	NA	NA	NA	NA	NA
APOH_HUMAN	VCPFAGILENGAVR	4.36	-0.287	-1.65	0.10651	2.72	0.10651	4.28963	4.20971	3.52044	3.63984	4.37789	4.35454	4.19376	4.43194	3.95347	3.85676	4.64745	4.80025	4.55723	4.62831	3.08077	3.33663	4.75671	4.88505	4.36067	4.52035	4.38173	4.63875	4.44186	4.65908	5.03156	5.06595	4.73414	4.96023	3.91109	4.02486	4.56424	4.62359	4.16334	4.22427	4.12048	4.17686	4.21467	4.48404	4.73191	4.98381
APOH_HUMAN	FICPLTGLWPINTLK	2.6	-0.787	-2.85	0.00678	8.13	0.00678	2.16825	2.15918	2.58026	2.64222	1.68183	1.62946	1.91004	2.38042	2.44201	2.20551	3.45547	3.69824	3.17231	3.0969	1.51353	1.74499	0.80449	-0.14232	2.35746	2.54855	2.32206	2.50724	2.75477	2.84876	3.08315	3.25897	3.81593	4.09244	2.4055	2.65711	3.38392	3.33102	2.60207	2.69455	2.74327	2.63307	2.97077	3.46928	2.87752	3.33947
APOH_HUMAN	KFICPLTGLWPINTLK	2.57	-0.61	-2.18	0.0355	4.75	0.0355	2.47218	NA	2.20745	2.15825	2.02368	1.63676	0.77017	2.28925	2.33724	2.11326	3.31279	3.38162	3.11831	2.82143	1.37787	1.38369	NA	NA	2.3167	2.22324	2.62946	2.4034	2.61937	2.58206	3.14836	2.72974	3.32129	3.63922	2.37046	2.22929	3.26443	3.19514	2.64934	2.47717	3.01032	2.81118	2.8548	3.18989	2.83407	3.10534
APOH_HUMAN	TCPKPDDLPFSTVVPLK	4.93	-0.173	-0.89	0.3768	0.8	0.3768	4.77965	5.07393	4.0742	4.10341	4.8249	4.82875	4.88017	5.19421	4.69925	4.41842	5.17421	5.28201	5.09359	5.17547	3.75127	3.83104	5.4709	5.68893	5.1669	5.35615	5.02621	5.17436	4.97676	5.34202	5.42791	5.58032	5.2643	5.57017	4.25839	4.42469	5.34172	5.31081	4.46151	4.72865	4.6167	4.48047	4.70953	4.94154	5.369	5.32792
APOH_HUMAN	CSYTEDAQCIDGTIEVPK	0.67	0.038	0.21	0.83431	0.04	0.83431	0.49437	0.55334	-0.12509	0.55316	0.66083	0.76297	0.83531	0.811955	0.60311	0.51639	0.36773	0.59689	0.64302	0.92682	0.03389	0.19921	1.434	1.47882	1.10587	1.33699	0.786965	0.823735	0.82853	1.11967	0.98258	0.86282	0.4465	0.418485	0.38276	0.34021	0.52308	0.549265	0.62407	0.871865	-0.35982	-0.07758	0.892135	0.84669	0.98887	1.17466
APOH_HUMAN	TFYEPGEEITYSCKPGYVSR	3.44	-0.363	-2.01	0.05106	4.04	0.05106	3.20336	3.30363	2.72759	2.6973	3.25555	3.20545	3.37707	3.6689	3.10495	2.95671	3.93419	3.69995	3.62387	3.50629	2.1544	2.1654	3.66266	3.71759	3.5357	3.72469	3.49839	3.48027	3.53595	3.88915	3.90013	4.01681	4.22487	4.31116	2.8267	2.86373	3.92576	3.86817	3.26777	3.16945	3.55875	3.31554	3.44349	3.34571	3.88805	4.14689
APOH_HUMAN	ATFGCHDGYSLDGPEEIECTK	3.72	-0.162	-0.83	0.41255	0.69	0.41255	3.60622	3.67138	2.85098	3.14147	3.58775	3.64088	3.71349	4.0765	3.49539	3.36743	3.84909	4.18117	3.72368	3.9041	2.50687	2.58428	4.21177	4.35954	3.95499	4.2924	3.68831	3.84337	3.76906	4.14103	4.10179	4.1892	4.28157	4.49118	3.07	3.19622	4.07845	4.16014	3.1045	3.36204	3.38217	3.43482	3.64945	3.79738	3.97318	4.25157
APOH_HUMAN	CPFPSRPDNGFVNYPAKPTLYYK	2.16	-0.457	-1.85	0.07102	3.44	0.07102	1.96311	1.71659	2.26966	1.44812	1.71459	1.61435	2.10956	2.32032	2.58563	2.3079	2.32281	2.40628	2.03927	2.07226	0.74159	0.75105	2.02463	1.90574	2.18439	2.43899	2.04969	2.03462	2.1647	2.44024	2.5057	2.27876	2.97209	2.84164	2.28235	2.16978	2.2782	2.34173	2.45911	1.60918	NA	2.86026	3.07228	2.00541	2.3672	2.57136
APOH_HUMAN	WSPELPVCAPIICPPPSIPTFATLR	3.9	-0.136	-0.38	0.70552	0.14	0.70552	3.41602	3.85419	3.90255	4.20294	3.26162	3.31054	3.12171	4.21791	4.14483	4.0201	4.7449	5.12586	4.50295	4.54429	3.06479	3.65302	3.08371	1.92036	4.04584	4.41566	3.83442	3.93722	4.00871	4.53122	3.14443	3.46223	5.16706	5.52137	3.89838	4.10792	4.61301	4.77379	3.99891	4.34744	2.96219	3.08035	3.01168	3.83358	2.94138	4.09283
APOM_HUMAN	SLTSCLDSK	-1.98	-1.053	-1.44	0.17351	2.07	0.17351	NA	NA	NA	NA	-2.8265	-1.9705	NA	NA	-2.15873	NA	NA	NA	NA	NA	NA	NA	-3.60674	-2.72543	NA	-2.02045	-2.34693	-2.32195	NA	NA	NA	NA	-0.98634	0.078285	NA	NA	-1.75498	-1.06252	NA	NA	NA	NA	NA	NA	NA	NA
APOM_HUMAN	WIYHLTEGSTDLR	-1.46	-0.531	-0.68	0.51101	0.47	0.51101	NA	NA	NA	NA	NA	NA	NA	NA	-2.58119	NA	-1.68486	-1.12757	NA	NA	NA	NA	NA	NA	NA	NA	-2.50874	NA	NA	NA	NA	NA	-0.19105	-0.063805	NA	NA	-2.04162	-1.48826	NA	NA	NA	NA	NA	NA	NA	NA
APOM_HUMAN	EELATFDPVDNIVFNMAAGSAPMQLHLR	-2.04	NA	NA	NA	NA	NA	NA	NA	NA	NA	NA	NA	NA	NA	NA	NA	NA	NA	NA	NA	NA	NA	NA	NA	NA	NA	NA	NA	NA	NA	NA	NA	-1.90413	-2.17013	NA	NA	NA	NA	NA	NA	NA	NA	NA	NA	NA	NA
ARFP1_HUMAN	KYENILK	4.84	0.049	0.35	0.72857	0.12	0.72857	4.42731	4.63038	5.02839	5.1499	4.75926	4.79694	4.9744	4.63825	4.83426	4.79549	4.5904	4.7011	4.65289	4.78269	5.03637	4.88897	5.03177	4.99658	5.15323	5.41275	4.55928	4.68558	4.72377	4.62118	4.82087	5.05034	4.42928	4.96591	4.95421	4.93133	4.50766	4.67464	4.77397	4.87918	4.92038	5.062	5.11022	4.93671	4.91277	4.78451
ASAP1_HUMAN	GDLKGVKGDLK	-3.69	NA	NA	NA	NA	NA	NA	NA	NA	NA	NA	NA	NA	-5.21173	NA	NA	NA	NA	NA	NA	NA	NA	NA	NA	-2.17089	NA	NA	NA	NA	NA	NA	NA	NA	NA	NA	NA	NA	NA	NA	NA	NA	NA	NA	NA	NA	NA
ATRN_HUMAN	SEAACLAAGPGIR	-2.13	0.396	0.86	0.41056	0.74	0.41056	-2.63464	-2.33774	NA	NA	NA	-1.90689	-2.37233	NA	NA	NA	NA	NA	NA	NA	NA	NA	-1.49705	-1.40821	NA	NA	NA	NA	NA	NA	NA	NA	NA	NA	NA	NA	NA	NA	NA	NA	NA	-2.75336	NA	NA	NA	-2.13943
ATRN_HUMAN	LTGSSGFVTDGPGNYK	-3.03	0.094	0.26	0.79441	0.07	0.79441	NA	-3.00745	-4.00962	-3.40291	NA	-2.88966	NA	-3.40295	-3.2413	NA	NA	-2.8174	NA	NA	NA	-3.91994	-2.39572	-1.65732	-2.68384	-2.14134	NA	NA	NA	-3.26583	NA	NA	-3.10228	-3.0127	NA	NA	-2.47054	-2.38876	NA	NA	-4.1256	NA	-3.68002	-3.66255	NA	-2.25876
ATS1_HUMAN	LHAFDQQLDLELRPDSSFLAPGFTLQNVGR	0.26	0.067	0.21	0.83721	0.04	0.83721	-0.41834	-0.55629	1.7842	1.46713	-0.76634	-1.25458	-0.50371	-0.324895	0.5524	0.20142	1.08215	0.98296	0.76383	0.29396	0.34776	0.56451	NA	NA	0.415695	0.06398	0.181645	-0.806045	-0.42277	-0.26994	NA	-1.10016	0.76803	0.814835	1.18616	0.87269	0.18002	-0.184625	0.50873	0.060075	0.91548	0.32363	0.529315	1.12109	-0.2452	0.313445
ATS4_HUMAN	MSQTGSHPGR	-0.96	-0.57	-0.99	0.32936	0.97	0.32936	2.1508	1.65182	-3.34132	-4.02948	NA	-0.9364	-0.6093	-1.00404	-1.86748	-1.50826	-1.27891	-1.71895	-0.63352	-1.33193	-2.54617	-1.90691	-1.28633	-2.00214	-0.511895	-1.15671	0.868965	0.307665	-2.19349	-2.73896	1.99018	1.70833	-1.73659	-2.61239	-0.93546	-1.24753	-0.52901	-1.09549	-0.95156	-1.30628	-2.43183	-2.89505	-2.10203	-0.75749	2.77846	2.42026
B2MG_HUMAN	VNHVTLSQPK	4.6	0.04	0.25	0.8026	0.06	0.8026	4.60285	4.79923	4.66574	4.87898	4.50474	4.40287	4.85189	4.91315	4.70617	4.46534	4.25579	4.68446	4.52746	4.75343	4.25974	4.67165	4.70106	4.77047	4.4345	4.63592	4.24772	4.49617	4.91657	5.25521	4.3742	4.53883	4.25997	4.37856	4.57478	4.63708	4.91377	5.23165	4.35263	4.56449	4.2803	4.38548	4.45655	4.6138	4.41686	4.78791
B2MG_HUMAN	VEHSDLSFSK	4.97	-0.013	-0.09	0.93214	0.01	0.93214	4.88694	5.23768	5.18479	5.23835	4.86504	4.84493	5.12923	5.13295	4.77895	4.87575	4.69647	4.86561	4.8883	5.09834	4.74259	4.90885	4.96072	4.95479	4.85241	5.03987	4.75539	4.86327	5.30049	5.45962	4.75598	4.99387	4.19771	4.71927	5.04471	5.09979	5.51659	5.60883	4.74826	4.9306	4.70569	4.72686	4.87798	4.98671	4.94902	5.19299
B2MG_HUMAN	DWSFYLLYYTEFTPTEK	-2.31	0.144	0.18	0.85642	0.03	0.85642	NA	-0.68761	-0.20487	0.17084	NA	-0.51364	NA	NA	-3.11658	-3.85085	-1.98433	-1.96479	-3.0281	-2.87233	NA	NA	-2.08591	-3.41477	-5.41721	-3.70338	-3.64208	-2.74749	-1.74361	-2.19859	-1.7052	NA	NA	-2.77655	-1.32801	-0.58636	-1.65736	-0.754215	-2.24651	-5.67155	-2.07709	-2.45082	NA	-2.63777	NA	NA
B2MG_HUMAN	SNFLNCYVSGFHPSDIEVDLLK	5.63	-0.411	-1.34	0.1889	1.78	0.1889	5.61788	5.76216	6.43744	6.45569	4.72037	4.97464	5.41222	5.62366	5.88435	5.70204	5.80526	5.99832	5.88007	5.80004	5.66762	5.80823	3.71987	2.18163	5.44721	5.49329	5.32838	5.16589	5.79272	6.04124	4.8975	5.21456	5.57141	5.94921	6.06623	6.08753	6.319	6.32993	6.01744	6.02599	5.91255	5.80058	5.80199	6.1797	5.81948	6.29718
B2MG_HUMAN	DWSFYLLYYTEFTPTEKDEYACR	-3.07	-1.001	-1.04	0.30355	1.09	0.30355	-3.90009	-2.06055	-1.02633	-1.08676	-5.60252	-1.12168	-4.48539	NA	-4.94351	NA	-3.41745	-3.2062	-3.43984	-4.46809	-4.12154	NA	-3.22927	-5.08628	NA	-5.37001	-4.12014	-3.00635	-1.90745	-3.29081	-2.40138	-5.26647	-2.45249	-2.40492	-1.53367	-1.07709	-1.80054	-2.15063	-4.13676	NA	-1.43559	-1.54982	-2.14159	-3.97745	-1.46	-4.76647
B2MG_HUMAN	SNFLNCYVSGFHPSDIEVDLLKNGER	2.73	-0.664	-1.81	0.07794	3.27	0.07794	2.52469	2.4843	3.30384	3.3126	1.94195	2.09337	2.46668	2.51843	2.45061	2.22088	3.18114	3.11631	3.16449	3.04183	3.00301	2.83517	0.75634	-1.42744	2.45126	2.43825	2.30414	2.07628	3.02171	2.96724	2.33366	2.24896	2.82847	3.02196	3.24878	3.10628	3.67581	3.60583	3.56542	3.37541	3.83565	3.69116	3.04562	3.44841	2.64392	3.11085
B3GN1_HUMAN	SCQEVFDK	1.58	0.364	1.58	0.12203	2.49	0.12203	1.17427	1.51077	1.87205	2.11741	1.89445	1.90754	1.3826	1.49635	2.0514	1.67632	1.22981	1.85493	1.11243	1.48156	1.87329	1.73816	2.21431	2.64962	1.80069	2.14762	1.36417	1.78151	1.46077	1.82547	0.55619	0.86837	0.41496	0.954315	1.92362	2.03836	1.04909	1.40535	1.74175	1.93677	1.70949	1.84463	1.82934	1.83119	0.45147	0.926185
B3GN1_HUMAN	YEAAVPDPR	1.68	0.268	1.53	0.133	2.35	0.133	1.5369	1.57524	1.81252	1.85203	2.01043	1.94483	1.44283	1.37567	1.84213	1.72355	1.38543	1.53448	1.26693	1.49551	1.98066	2.07844	2.53969	2.61486	2.09761	2.26184	1.93273	1.95254	1.67536	1.74249	1.18031	1.12555	0.28159	0.769175	2.07951	2.06477	1.40337	1.43213	2.042	2.13316	1.62045	1.53408	1.94198	2.10346	1.00903	0.989985
B3GN1_HUMAN	EPGEFALLR	2.94	0.143	0.88	0.38536	0.77	0.38536	2.88784	3.09043	3.27858	3.24792	2.9924	3.01474	2.45951	2.68281	3.03172	2.94859	2.93182	2.91457	2.63391	2.7405	3.07515	3.12182	3.3069	3.58432	2.9459	3.32336	3.06032	3.2035	2.53003	2.90064	2.49225	2.60326	2.06869	2.04216	3.42601	3.35475	2.67599	2.63103	3.20365	3.32854	3.22348	3.18282	3.2848	3.36434	2.22806	2.54779
B3GN1_HUMAN	WEGPLSVSVFAATK	2.18	-0.106	-0.4	0.68856	0.16	0.68856	1.28655	2.03495	3.12467	3.23458	1.54469	1.49656	1.09481	1.64577	2.65577	2.39537	2.6104	2.76695	2.13023	2.24839	2.32233	2.55965	1.57336	1.18088	2.173	2.54825	2.1528	2.14136	1.68282	1.80159	1.29726	1.23468	2.04345	2.40367	3.07198	3.1108	1.9971	2.12283	2.86707	2.97988	2.76506	2.74261	2.48699	2.74341	1.12106	1.97402
B3GN1_HUMAN	TALASGGVLDASGDYR	1.16	1.09	0.42	0.68169	0.18	0.68169	NA	NA	3.46684	NA	1.41669	NA	NA	NA	NA	NA	2.98676	-1.3229	NA	NA	NA	NA	NA	NA	NA	NA	NA	NA	NA	NA	NA	-0.76373	2.11689	NA	NA	NA	2.65687	NA	NA	-1.28538	NA	NA	3.72995	-1.42521	NA	NA
B3GN1_HUMAN	EEAQLATVLAYALSSHCPDMR	2.96	-0.068	-0.35	0.72911	0.12	0.72911	2.91073	2.97372	3.78755	3.93752	2.1136	2.66316	2.37839	2.40478	3.21452	3.17849	3.12537	3.26834	2.70897	2.56798	3.21279	3.13337	2.15271	2.06846	3.33928	3.37882	3.23777	3.0128	2.60334	2.69738	2.2842	2.2874	2.60212	2.77016	3.57512	3.52691	2.58425	2.63517	3.62617	3.63173	3.6015	3.42075	3.25264	3.44401	2.37456	2.71145
B3GN1_HUMAN	EMLDQSNQWGGTALVVPAFEIR	2.47	-0.089	-0.32	0.74982	0.1	0.74982	2.35835	2.52205	3.39958	3.61892	1.52813	1.97009	1.84905	1.98579	3.07668	2.59084	2.95869	2.93334	2.35264	2.12135	2.9246	2.81929	1.62648	0.53187	2.74206	2.69845	2.54928	2.21172	2.1499	2.08473	1.72018	1.54536	2.2062	2.51898	3.17869	3.13587	2.43736	2.53547	3.35348	3.28118	3.05846	2.80486	2.72519	3.11891	1.53408	2.23434
B3GN1_HUMAN	ISQACELHVAGFDFEVLNEGFLVHK	2.9	-0.175	-0.61	0.54628	0.37	0.54628	2.81636	2.6454	4.01172	3.74679	2.35484	2.87521	2.60448	2.20228	3.53649	3.42484	3.39335	3.29243	2.966	2.5993	3.52226	3.25431	1.01797	0.24984	2.9037	2.7361	3.12617	2.58934	2.82199	2.66719	2.07304	1.82166	2.90605	2.9009	3.78805	3.60351	3.01981	2.74241	3.51578	3.08055	3.6427	3.24889	3.63477	3.48051	2.34266	2.6526
B3GN1_HUMAN	TTMDPNDVILATHASVDNLLHLSGLLER	-0.08	-0.485	-0.78	0.44101	0.61	0.44101	-0.88003	1.45616	1.50902	2.11231	-2.63352	-3.07225	-1.40986	-2.08163	0.35194	2.13454	0.35676	0.04565	-0.6012	-0.80243	0.18659	1.28293	-2.39377	NA	-0.280745	-0.69188	-0.581185	-1.89377	-1.39062	-1.10049	0.03744	NA	-0.45343	-0.031925	2.03959	2.20915	-0.56851	-1.12487	0.79014	1.11844	1.19537	1.65399	0.272905	1.56526	-0.73636	-0.807545
B3GN1_HUMAN	WVNLPEESLLRPAYVVPWQDPWEPFYVAGGK	-0.48	0.192	0.22	0.82834	0.05	0.82834	NA	NA	1.08454	1.63373	NA	NA	NA	NA	-1.05181	-1.2196	-0.39836	0.02679	-0.98333	NA	-1.5488	1.07424	NA	NA	NA	-1.39602	NA	NA	NA	-2.20463	NA	NA	-1.61812	0.702785	0.52475	0.51438	-1.59063	-1.21833	NA	-0.149125	-0.47872	NA	NA	1.10557	-2.67347	-0.650575
BAI2_HUMAN	LLAPAALAFR	-2.23	-0.008	-0.02	0.98101	0	0.98101	-2.75367	-2.43673	-1.49995	-1.50543	-2.42914	-2.82491	-3.22894	-2.72112	-1.90953	-2.32777	NA	NA	-1.80893	NA	-3.08709	-2.53213	-1.47958	-1.11724	-3.06384	NA	-2.03505	-1.73647	-3.42746	NA	NA	-2.49862	NA	NA	-1.59218	-1.45971	NA	-3.49157	-1.60567	-1.6077	-1.15849	-1.39577	-2.3428	-1.62065	-2.87735	-3.57863
BASP1_HUMAN	ESEPQAAAEPAEAK	-6.11	NA	NA	NA	NA	NA	NA	NA	-6.29442	-5.68645	-7.24709	NA	NA	NA	-6.06566	NA	NA	NA	NA	NA	NA	NA	-6.04636	-5.32298	NA	NA	NA	NA	NA	NA	NA	NA	NA	NA	NA	NA	NA	NA	NA	NA	NA	NA	NA	NA	NA	NA
BDP1_HUMAN	ETEKNASK	-0.53	0.638	1.5	0.14482	2.25	0.14482	NA	-0.97977	NA	NA	0.19609	0.65406	0.0943	0.254775	0.11529	-0.06401	-1.43555	-0.03489	NA	-0.22484	-0.53326	-1.02496	NA	0.19761	NA	-1.13024	NA	-2.36955	NA	-1.17735	NA	-1.1081	NA	-0.604125	NA	NA	-0.99033	0.006225	-1.50108	NA	-0.58409	0.11947	0.359585	-0.75853	NA	-1.20209
BGH3_HUMAN	ILGDPEALR	-2.23	-0.683	-1.82	0.09302	3.31	0.09302	NA	NA	-3.18075	-3.28838	NA	NA	-1.92305	NA	NA	NA	-2.67915	NA	NA	NA	NA	NA	NA	NA	NA	NA	-2.14152	NA	NA	NA	NA	NA	NA	NA	NA	NA	NA	NA	-1.44652	-1.56709	-1.82753	-2.17388	-2.11972	-2.20058	NA	NA
BGH3_HUMAN	YGTLFTMDR	-1.77	-0.117	-0.28	0.78383	0.08	0.78383	NA	NA	NA	NA	NA	NA	NA	NA	NA	-2.45757	NA	NA	NA	-2.11865	-2.16743	NA	NA	NA	NA	-1.06745	NA	NA	NA	NA	-2.04168	-1.42339	-2.76797	NA	NA	NA	-2.06882	NA	-1.59473	-1.04733	-1.93736	NA	-2.18592	NA	-1.12556	-0.829825
BGH3_HUMAN	LTLLAPLNSVFK	-0.27	-0.502	-2.44	0.01996	5.94	0.01996	-0.26946	-0.05455	-0.72296	-0.70655	-0.39779	-0.09322	-0.28245	-0.499265	NA	-0.7538	NA	-0.31537	-0.47003	-0.60728	-0.49701	-0.56335	-1.3422	-1.04978	-0.339515	-0.21557	0.036245	-0.583035	-0.00692	0.25503	-0.09037	0.15929	NA	NA	-0.28336	-0.45966	NA	NA	0.29831	0.057855	0.38805	-0.09341	-0.320065	-0.14143	0.02085	0.597455
BGH3_HUMAN	GDELADSALEIFK	-0.68	0.144	0.64	0.5263	0.41	0.5263	-0.95481	NA	-1.25834	-0.47183	-0.42551	-0.55343	NA	-0.293755	NA	-0.61738	-0.41428	-0.56979	-0.47918	-0.78323	NA	-0.63967	-0.57375	-0.52711	-0.898305	-0.24071	-0.820215	-1.1461	NA	-0.51404	-0.31567	-0.59622	-1.52725	-1.15436	-0.76043	NA	-1.16782	-0.614765	-0.40781	-0.308475	-0.42712	-0.95919	NA	-1.18293	-0.54058	-0.217835
BGH3_HUMAN	VLTPPMGTVMDVLK	-1.82	-0.515	-1.72	0.09321	2.96	0.09321	-1.49126	-1.90914	-1.88751	-1.93558	-2.1372	-2.95321	-2.3101	-2.08759	-2.40427	-3.00265	-3.07643	-2.40776	NA	NA	-2.20041	-2.22124	-2.18054	-2.28736	-0.971795	-0.81333	-1.25998	-1.11119	-1.12773	-0.63568	-1.61275	-1.71796	-3.64681	NA	-1.71088	-1.60713	-1.8457	-2.04554	-1.17305	-1.18607	-1.17028	-1.56584	-2.2376	-1.91294	-0.80798	-0.572695
BGH3_HUMAN	YLYHGQTLETLGGK	-1.89	-0.278	-0.98	0.33828	0.96	0.33828	NA	-2.17241	NA	-2.376	NA	-1.88851	-1.91258	-1.52489	NA	-2.62528	-2.2323	-2.19077	NA	-2.59108	NA	NA	NA	-1.36656	-1.61227	-0.91433	NA	-1.63078	NA	-1.17205	NA	NA	NA	NA	-2.6346	-2.32941	NA	-1.93721	-2.12722	-1.4673	NA	-1.81847	NA	-1.83476	NA	-1.14101
BRWD3_HUMAN	NDQNTSVSHAR	0.97	0.498	1.58	0.12281	2.48	0.12281	-0.65384	0.13033	0.28789	0.70975	1.98973	2.01999	1.32063	1.39061	1.71162	1.47017	0.3376	0.88522	1.49307	1.95644	1.76172	1.64871	1.25541	1.4556	1.40138	1.87336	0.742795	1.15014	1.27679	1.46713	0.30348	0.50298	-0.62652	0.159935	0.81645	0.91178	0.66822	1.22155	0.92247	1.71459	0.02269	0.53744	1.09516	1.26298	-0.31071	0.640395
BTD_HUMAN	SHLIIAQVAK	-0.19	0.08	0.33	0.74326	0.11	0.74326	-0.69192	-0.69738	0.47833	0.41014	-0.56436	NA	0.08974	-0.493165	-0.09548	NA	NA	NA	NA	NA	NA	NA	-0.22452	-0.39237	NA	0.21031	NA	NA	NA	-0.69844	-0.1131	-0.15051	NA	NA	NA	-0.04904	NA	NA	-0.27563	NA	0.07496	0.04045	-0.469225	NA	NA	NA
BTD_HUMAN	ILSGDPYCEK	0.08	0.186	0.97	0.33539	0.95	0.33539	-0.58758	-0.03444	0.56827	0.84575	-0.1301	-0.05914	0.19874	-0.088195	0.44403	0.38397	0.0597	0.32256	-0.13032	0.23489	-0.13487	-0.21585	0.19327	0.48278	0.332375	0.77426	0.049185	0.228525	-0.01845	-0.3269	-0.06217	0.27164	-0.50706	-0.194715	0.03162	0.09204	-0.41625	0.124285	0.07413	0.334865	0.34682	0.52912	0.094615	-0.09682	-0.48371	-0.331745
BTD_HUMAN	GDMFLVANLGTK	0.38	NA	NA	NA	NA	NA	NA	NA	0.25447	0.51374	NA	NA	NA	NA	NA	NA	NA	NA	NA	NA	NA	NA	NA	NA	NA	NA	NA	NA	NA	NA	NA	NA	NA	NA	NA	NA	NA	NA	NA	NA	NA	NA	NA	NA	NA	NA
BTD_HUMAN	LSSGLVTAALYGR	2.02	0.172	0.46	0.6524	0.21	0.6524	1.70858	NA	NA	NA	NA	NA	1.87104	2.13122	NA	NA	NA	2.03869	NA	1.7404	NA	NA	2.50813	2.74541	NA	NA	NA	NA	NA	NA	NA	NA	1.75024	1.57508	NA	NA	NA	NA	NA	NA	2.12057	2.00191	NA	NA	NA	NA
BTD_HUMAN	VDLITFDTPFAGR	0.7	0.263	1.21	0.23267	1.47	0.23267	0.21141	0.53073	1.62734	1.89337	0.2472	0.4203	0.52859	0.729635	1.16036	1.14669	0.80633	1.24208	1.01511	1.0958	0.53361	0.60629	0.3595	0.48695	0.812935	1.24429	0.240325	0.272575	0.37664	0.99079	0.34693	0.67188	0.0819	0.517345	0.81251	1.00896	0.19532	0.654215	0.96094	1.06018	1.25015	1.02753	0.326075	0.57675	-0.27262	0.340495
BTD_HUMAN	TSIYPFLDFMPSPQVVR	1.54	-0.095	-0.27	0.78846	0.07	0.78846	1.02341	1.09597	2.67957	2.93523	NA	NA	0.64071	1.57594	2.06023	NA	2.1597	2.35586	1.57549	1.66033	1.23987	NA	-1.08539	NA	1.65318	1.82691	1.06936	NA	1.35978	NA	1.48665	1.63131	1.6871	2.05751	1.91515	NA	1.47656	1.5287	1.96331	NA	2.31303	NA	1.01608	NA	0.45262	1.25172
BTD_HUMAN	QEALELMNQNLDIYEQQVMTAAQK	0.1	-0.08	-0.32	0.75376	0.1	0.75376	-0.21486	-0.1446	1.14523	1.52254	-1.49405	-1.03083	-0.28114	0.049475	0.63694	0.59924	0.62225	0.81847	-0.0911	0.0079	0.09901	NA	-1.2802	NA	0.324485	NA	-0.097185	-0.405405	-0.36489	-0.15117	-0.22373	-0.56797	0.26412	0.368555	0.51165	0.43889	-0.23943	0.035425	0.76261	0.690625	0.69577	0.52035	0.000835	NA	-0.27556	0.206685
C163A_HUMAN	LVGGDIPCSGR	-1.87	0.161	0.62	0.54063	0.38	0.54063	-2.51607	-2.73894	-1.42238	-1.01297	-1.75328	-1.86192	-1.88633	-2.2242	-1.70565	-1.66797	NA	-2.06843	NA	-1.3759	-1.96953	-1.43711	-1.66364	-1.49182	-1.83062	-1.43765	-2.05782	-2.03682	-0.94162	-1.11394	-1.88381	-1.66811	-3.59292	-2.33719	NA	-1.61503	NA	-1.91643	NA	-1.66718	-1.99678	-2.03204	-2.19399	-1.78009	-2.15612	-2.46122
C163A_HUMAN	QLGCPTAVTAIGR	-1.62	0.338	0.7	0.49419	0.49	0.49419	NA	NA	NA	-0.7942	NA	NA	NA	NA	NA	-1.56021	NA	NA	NA	-1.2243	-1.57546	NA	NA	NA	-2.02217	NA	-1.77134	NA	-0.94674	NA	NA	-1.35892	-3.81071	NA	-1.13905	NA	NA	NA	-1.87823	-1.37301	NA	NA	NA	NA	NA	NA
C163A_HUMAN	GPDTLWQCPSSPWEK	-1	-0.276	-0.29	0.78159	0.08	0.78159	-0.56397	-1.37259	NA	NA	NA	NA	NA	NA	NA	NA	NA	NA	NA	NA	NA	-1.12961	NA	NA	NA	-1.35295	NA	NA	-0.89744	NA	NA	NA	NA	NA	NA	NA	NA	NA	NA	NA	NA	NA	NA	NA	-0.09977	-1.5838
C1QA_HUMAN	SLGFCDTTNK	1.44	-0.184	-0.75	0.45635	0.57	0.45635	1.0649	1.50126	0.90167	1.2569	1.2155	1.23932	1.31492	0.787805	1.70377	1.52901	1.29476	1.64092	1.10382	1.43826	1.38768	1.31845	1.29893	1.69023	1.3888	1.90222	1.26124	1.40509	2.44832	2.15569	0.87386	1.29065	0.8632	1.10879	0.91366	1.1455	2.95919	3.46703	0.91209	1.33976	1.11262	1.3023	1.67888	1.33033	1.41779	1.66508
C1QA_HUMAN	GHIYQGSEADSVFSGFLIFPSA	-3.09	-2.117	-1.84	0.10562	3.4	0.10562	NA	-5.7221	NA	NA	NA	NA	NA	NA	NA	NA	-3.77305	NA	NA	NA	NA	NA	NA	NA	NA	NA	NA	NA	-2.17285	NA	NA	NA	NA	NA	NA	NA	-0.81783	-1.22697	-4.85106	NA	NA	NA	NA	NA	NA	NA
C1QA_HUMAN	KGHIYQGSEADSVFSGFLIFPSA	2.7	NA	NA	NA	NA	NA	NA	NA	NA	NA	NA	NA	NA	NA	NA	NA	NA	NA	NA	NA	NA	NA	NA	NA	NA	NA	NA	NA	NA	NA	NA	NA	NA	NA	NA	NA	2.75574	2.6362	NA	NA	NA	NA	NA	NA	NA	NA
C1QA_HUMAN	GLFQVVSGGMVLQLQQGDQVWVEKDPK	-2.15	-0.555	-0.99	0.3387	0.98	0.3387	NA	NA	-2.20125	NA	NA	NA	NA	NA	-2.63387	-3.31524	-2.48111	NA	-3.13064	NA	-1.9894	NA	NA	NA	NA	NA	NA	NA	-1.36832	NA	NA	NA	-2.12604	NA	-3.5598	NA	0.25737	-0.128625	NA	NA	NA	NA	-2.52718	NA	-2.73099	NA
C1QB_HUMAN	TINVPLRR	0.39	-0.351	-1.77	0.08452	3.12	0.08452	0.3889	0.68341	-0.05747	-0.015	-0.16534	-0.31822	0.38276	0.009565	0.14149	0.17636	0.4983	0.57246	0.41453	0.47456	0.06789	0.26075	-0.01532	0.06463	0.372715	0.31706	0.413805	0.303905	1.19234	0.65039	0.36026	0.56134	0.07459	0.173715	0.24155	0.21374	2.16038	2.33398	-0.31677	0.041705	0.43298	0.303	0.318405	0.47869	0.74742	0.594615
C1QB_HUMAN	GNLCVNLMR	1.3	-0.4	-2.15	0.03744	4.62	0.03744	1.14503	1.21796	0.91644	1.08719	0.53557	0.49613	1.10914	1.03991	1.38674	1.21535	1.32728	1.58714	1.07058	1.19536	1.33803	1.20287	0.75862	0.70223	1.17056	1.46398	1.29212	1.34234	2.31545	2.51097	0.96961	1.02753	1.22001	1.15522	1.188	1.1271	3.02277	3.07567	1.02382	1.07645	1.14908	1.06454	1.30539	1.20557	1.38978	1.51388
C1QB_HUMAN	LEQGENVFLQATDK	1.13	-0.231	-1.04	0.30269	1.09	0.30269	1.08569	1.52509	0.54193	0.66843	0.56046	0.82879	0.93221	1.17084	1.20818	1.0709	1.1132	1.52522	0.74741	1.04484	0.74026	0.75104	0.9378	1.23352	1.17485	1.45441	0.875545	1.07194	1.9644	2.31584	0.71582	0.83354	1.13774	1.1961	0.6875	0.7342	2.84848	3.05165	0.46833	0.849965	0.78799	0.88382	0.879235	0.91133	1.23853	1.48595
C1QB_HUMAN	VPGLYYFTYHASSR	2.25	-0.484	-2.25	0.03018	5.06	0.03018	2.04918	2.13444	1.93507	2.17231	1.55469	1.35582	2.20973	2.47804	2.38448	2.05745	2.52512	2.26554	2.09104	2.14109	2.00942	2.09429	0.84079	NA	2.08527	2.1502	2.07414	2.28513	3.05788	3.30059	1.79014	1.90306	2.10507	2.2367	2.26424	2.22483	4.17093	4.17115	1.85991	1.96271	2.4387	2.36454	2.1645	2.23863	2.30439	NA
C1QB_HUMAN	FDHVITNMNNNYEPR	1.27	-0.28	-1.18	0.24586	1.39	0.24586	1.32052	1.31112	0.68581	1.17464	0.20492	0.20078	1.24298	1.36223	1.56917	1.23352	1.48748	1.85378	1.07413	1.17896	1.10355	1.06321	0.69756	0.68361	1.44602	1.73042	0.995315	1.10684	2.09814	2.49278	0.62647	0.83675	1.05307	1.4459	1.16721	1.02098	3.19068	3.30855	0.84386	0.988285	1.2466	0.77647	1.09762	1.14797	1.34002	1.45061
C1QB_HUMAN	VVTFCDYAYNTFQVTTGGMVLK	-2.62	-0.364	-0.5	0.61766	0.25	0.61766	-3.01742	-4.17318	-2.05148	-3.0362	NA	NA	-2.89731	-4.75007	-2.49726	NA	-1.45488	-2.44377	-2.30501	-3.42744	-1.82622	-3.65316	NA	NA	-2.96337	NA	-3.54273	NA	-0.65788	-2.55155	-3.82697	NA	-1.41252	-2.53539	-2.2536	-3.2872	0.60341	-0.240275	-2.40354	-4.41533	-2.93834	-3.57263	-2.19306	-2.83811	-2.52311	-2.67434
C1QC_HUMAN	FQSVFTVTR	2.37	-0.384	-2.04	0.04794	4.15	0.04794	2.22316	2.42633	1.85385	1.9195	1.81749	1.85689	2.02702	2.27052	2.4332	2.3249	2.4759	2.3719	2.30435	2.42971	2.12409	2.19186	1.84628	2.09055	2.23296	2.34389	2.21354	2.33867	3.14408	3.54353	2.03205	2.33788	2.02874	2.07668	2.28112	2.31446	4.13575	4.17558	2.05816	2.12352	2.26493	2.25428	2.4234	2.4176	2.39791	2.67579
C1QC_HUMAN	VVTFCGHTSK	-2.57	-0.276	-0.63	0.53267	0.4	0.53267	-2.17306	-2.2094	-3.54362	-4.24451	-2.61979	-3.20724	-2.37361	-2.34048	-2.45514	-3.00775	-2.87123	-2.35163	-2.74097	-2.64143	-3.27373	-1.54123	-2.86736	-2.90993	-2.30146	NA	-2.36316	NA	-1.16075	-0.68794	-2.74256	NA	-2.31814	-2.48178	-3.39409	-4.08194	-0.22108	-0.358715	NA	-3.71979	-3.40853	-4.13537	NA	-1.97817	NA	NA
C1QC_HUMAN	TNQVNSGGVLLR	1.38	-0.189	-0.86	0.39315	0.74	0.39315	0.93734	1.38132	1.04568	1.3022	1.01297	1.18324	1.53008	1.16939	1.49855	1.44687	1.3607	1.64913	1.03354	1.30955	1.23589	1.043	1.03854	1.38068	1.40119	1.72404	0.986665	1.05357	2.26642	2.29515	0.78743	1.19363	0.80731	0.767695	1.34529	1.40797	2.78749	3.27345	0.94709	1.16321	1.40177	1.46457	1.64162	1.18376	1.23482	1.45322
C1QC_HUMAN	QTHQPPAPNSLIR	0.91	-0.288	-1.31	0.19887	1.7	0.19887	0.55706	0.88837	0.21988	0.62348	0.33528	0.26106	1.35402	0.893045	1.07609	0.98096	1.15821	1.1293	0.65994	0.85355	0.45071	0.43028	0.75878	0.73646	0.768775	1.24231	0.435985	0.523325	1.80713	1.44697	0.62351	0.82028	0.79546	1.01801	0.47185	0.65233	2.67485	3.00648	0.37919	0.718445	1.13289	1.04566	1.00748	0.9596	0.82114	0.791295
C1QC_HUMAN	FNAVLTNPQGDYDTSTGK	1.96	-0.198	-0.92	0.36161	0.85	0.36161	1.86004	2.11574	1.49156	1.85378	1.46935	1.50101	2.07517	2.0759	2.11636	2.09046	1.90442	2.27317	1.6522	1.94244	1.76498	1.66331	1.50681	1.81891	1.89146	2.19986	1.46175	1.80245	2.62558	3.07163	1.42055	1.47529	1.79716	1.95114	1.65402	1.68623	3.69711	3.84366	1.49683	1.8177	1.85851	1.89834	1.76547	1.91397	1.84264	2.13959
C1QC_HUMAN	VPGLYYFVYHASHTANLCVLLYR	-2.9	-0.709	-0.8	0.4312	0.65	0.4312	NA	-0.95943	-3.46316	-3.31326	NA	-1.82834	NA	NA	NA	NA	-3.74818	-3.87386	-3.63398	-5.18069	NA	NA	-3.04595	-5.28396	NA	NA	NA	NA	-2.69229	-2.24062	-3.06404	NA	NA	-3.41755	NA	NA	-0.26817	-0.137715	NA	NA	-3.23366	NA	NA	NA	NA	NA
C1R_HUMAN	NIGEFCGK	-1.61	-0.079	-0.21	0.83658	0.04	0.83658	-2.3852	-1.84471	-3.25687	-2.94081	-1.50603	-0.20119	-1.56954	-1.65219	-1.71067	-1.71752	-1.96079	-1.77358	-2.39235	-1.72917	-1.50825	-1.57175	-0.98948	0.1859	-1.48348	-0.89469	-2.02845	-1.75554	-0.42993	-0.36895	-2.45787	-2.12899	-2.95711	-1.91214	-1.8307	-1.85618	0.06916	0.593445	-1.80708	-1.54356	-2.42349	-2.44139	-1.60343	-2.03888	-1.1605	-1.24655
C1R_HUMAN	VSVHPDYR	-1.13	-0.234	-0.94	0.35213	0.89	0.35213	NA	-1.52997	-1.37613	-2.00701	-1.75924	NA	-1.2152	-1.14878	-1.25596	NA	-1.42271	-0.80047	-1.42648	-1.60868	NA	-0.80692	-0.96048	NA	-0.812985	NA	-1.72056	-1.24063	-0.65628	-0.44242	-1.81131	NA	-1.1407	NA	-1.13089	NA	0.45702	0.318775	-1.42488	-1.245	-1.59067	-1.62358	NA	-1.06082	-0.83827	-0.546915
C1R_HUMAN	VLNYVDWIK	2.2	-0.274	-1.58	0.12254	2.5	0.12254	2.47856	2.24058	1.87449	NA	1.71117	NA	2.22776	2.43343	1.94752	NA	2.22414	2.3209	1.92804	1.89035	2.04992	2.23174	NA	1.83846	1.93268	1.95618	2.04047	2.02628	2.47115	2.44404	1.88378	1.91024	1.54239	1.89472	2.38558	2.38711	3.17449	3.26541	2.48921	NA	1.95308	2.03595	1.92003	2.36364	2.61815	3.02028
C1R_HUMAN	YTTTMGVNTYK	0.29	-0.236	-1.04	0.30504	1.08	0.30504	-0.08528	0.445	-0.00385	0.43239	-0.27919	-0.09318	0.19374	-0.433805	0.33361	0.21851	-0.06501	0.31444	-0.11506	0.03477	-0.07996	0.22692	0.36351	0.54113	0.505205	0.99098	0.062015	0.176885	0.97455	0.54054	-0.24834	-0.15663	-0.29757	-0.364455	0.44119	0.61128	1.476	1.85496	0.1256	0.425205	-0.01399	0.10022	0.057565	0.36832	0.9378	1.10194
C1R_HUMAN	FCGQLGSPLGNPPGK	2.31	-0.141	-0.78	0.44151	0.6	0.44151	1.46661	1.77222	2.92392	3.04796	2.27984	2.29335	2.67338	2.82909	2.25585	2.13356	2.49646	2.81491	2.02853	2.09574	1.56515	1.55883	1.53168	1.86085	2.46741	2.70513	2.62156	2.71516	2.22553	2.46003	2.25307	2.25572	2.55138	2.66614	2.52031	2.4292	2.58272	2.62705	2.40663	2.57126	2.24685	2.16238	2.36075	1.67667	2.04624	2.24749
C1R_HUMAN	IQYYCHEPYYK	-0.15	-0.294	-1.24	0.22046	1.55	0.22046	-0.38038	-0.25399	-0.98687	-0.91663	-0.76333	-1.15411	0.07829	0.083965	-0.02706	-0.28939	0.07087	0.13012	-0.51057	-0.43716	-0.28772	0.06526	-0.33348	-0.59751	0.025765	0.5815	-0.524625	-0.727685	0.52657	0.21003	-1.05402	-0.80817	-0.53672	-0.288495	-0.22466	-0.18389	1.73892	1.91454	-0.1774	-0.011885	-0.51652	-0.47887	-0.169795	0.04296	0.62532	0.618945
C1R_HUMAN	QDACQGDSGGVFAVR	0.07	-0.177	-0.72	0.47411	0.52	0.47411	-0.06041	0.18764	-0.99403	NA	-0.45288	-0.24659	0.06698	0.340195	0.24037	-0.08492	-0.34371	0.12459	-0.43294	-0.11844	-0.01095	-0.0338	0.17318	0.53306	0.382575	0.62924	-0.353735	-0.042855	0.78023	1.00509	-0.68075	-0.51063	NA	-0.412965	-0.26407	-0.04785	1.70448	1.94111	-0.19132	0.178945	-0.67172	-0.54328	-0.293105	-0.1737	0.70818	0.789985
C1R_HUMAN	LPVANPQACENWLR	2.37	-0.295	-1.76	0.08522	3.11	0.08522	2.72035	2.51125	2.68189	2.69312	1.59701	1.52623	2.35203	2.49065	2.39366	2.11739	2.21195	2.21963	1.97195	2.15207	1.90412	2.10416	2.01713	1.90765	2.25447	2.57484	2.51322	2.59416	2.64359	2.81356	2.36944	2.15005	1.73174	1.52987	2.33175	2.1768	3.25613	3.25271	2.33829	2.61029	2.55836	2.53392	2.29195	2.43017	3.03093	3.14545
C1R_HUMAN	CLPVCGKPVNPVEQR	-1.38	-0.045	-0.11	0.91326	0.01	0.91326	NA	-0.86783	NA	NA	NA	NA	-0.92618	-2.00057	-1.57629	NA	-2.18489	-1.57974	NA	NA	-1.58656	NA	-1.18714	-1.61399	-1.3525	NA	NA	-2.64729	NA	-1.77521	NA	NA	NA	NA	-1.386	NA	-0.67164	0.119385	-1.66389	NA	NA	NA	-1.17551	NA	-1.11116	-1.02912
C1R_HUMAN	MGNFPWQVFTNIHGR	1.36	-0.788	-2.28	0.02766	5.22	0.02766	0.98787	1.16018	1.61992	1.6207	0.09018	-0.2924	1.26696	1.3197	1.3281	1.22589	1.78858	1.74536	1.35916	1.1139	1.59891	1.91553	-2.71639	NA	1.18345	1.33997	1.19009	0.740695	1.84089	1.954	0.92915	0.40029	1.43553	1.6791	1.93334	1.79666	2.75055	2.7947	1.82896	1.79414	1.88457	1.49317	1.24574	1.77088	1.71532	2.15474
C1R_HUMAN	ESEQGVYTCTAQGIWK	0.82	-0.243	-1.12	0.27006	1.25	0.27006	0.83112	1.00517	0.10361	0.54402	-0.00098	-0.02646	1.07183	1.28835	0.49425	0.47117	0.90412	1.14202	0.48206	0.66925	0.5713	0.88648	0.71186	0.59019	1.02408	1.23437	0.403825	0.340405	1.46848	1.6992	0.24689	0.13649	0.4975	0.627335	0.67063	0.50466	2.4221	2.48055	0.48998	0.949385	0.40247	0.4991	0.778805	0.9343	1.53591	1.76084
C1R_HUMAN	MDVFSQNMFCAGHPSLK	1.64	-0.275	-1.41	0.1667	1.98	0.1667	1.81816	1.77634	1.48747	1.64545	0.56196	0.49319	1.43958	1.93937	1.65592	1.36833	1.7419	1.74048	1.51802	1.43989	1.51925	1.66613	1.03536	1.05559	1.93281	2.29972	1.62833	1.64552	2.02716	2.21354	1.01846	1.12765	1.32191	1.55062	1.77943	1.83538	2.84856	2.75257	1.73397	1.90508	1.63337	1.42402	1.09804	1.5189	2.39327	2.17415
C1R_HUMAN	GFLAYYQAVDLDECASR	-1.84	-0.369	-0.48	0.64013	0.23	0.64013	-2.70183	-2.95764	NA	NA	NA	NA	-1.88255	NA	NA	NA	NA	NA	NA	NA	-1.91844	NA	NA	NA	-1.8415	NA	NA	NA	NA	NA	-3.03845	NA	NA	NA	NA	NA	-0.26671	-1.00652	-2.50154	NA	NA	NA	NA	NA	-0.26929	-1.84984
C1R_HUMAN	TLDEFTIIQNLQPQYQFR	2.23	-0.541	-1.75	0.08708	3.07	0.08708	1.72764	2.47978	1.54328	2.01738	1.05649	1.47006	1.98765	2.30315	2.36154	2.33065	2.53246	2.85709	2.2539	2.07634	2.11698	2.47128	0.91827	0.08091	2.23635	2.35759	1.91101	1.81821	2.58397	3.24559	1.39874	1.96819	2.07904	2.43571	2.1832	2.31572	3.70563	3.94388	2.59756	2.67914	2.29574	2.16542	1.74896	2.60587	2.83916	3.47818
C1R_HUMAN	LVFQQFDLEPSEGCFYDYVK	0.51	-0.715	-1.82	0.07769	3.3	0.07769	NA	0.14795	0.03533	0.44093	NA	-2.20585	NA	0.454235	0.64752	0.775	1.10457	1.20551	0.70021	0.17819	0.27869	0.787	-2.14747	NA	0.272145	0.14481	-0.155015	NA	0.51485	0.72692	NA	-0.7223	0.30302	0.854315	0.58374	0.72112	2.06524	2.27202	1.02536	1.16477	0.55016	0.21008	0.079005	1.03699	1.14891	2.11552
C1R_HUMAN	QRPPDLDTSSNAVDLLFFTDESGDSR	-0.37	-0.33	-1.42	0.16329	2.01	0.16329	0.04622	0.12351	-1.04771	-0.74056	-1.31633	-1.07441	-0.21714	-0.094525	-0.44006	-0.48311	-0.18426	-0.05645	-0.54616	-0.82755	-0.43599	-0.66639	-0.92286	-1.40542	-0.129295	-0.31774	-0.836415	-0.968175	0.25649	0.1746	-0.78372	-1.12075	-0.836	-0.667725	-0.67337	-0.6647	1.45711	1.42654	0.08948	-0.016075	-0.49635	-0.65184	-0.293955	-0.43106	0.17219	0.725545
C1R_HUMAN	QGYQLIEGNQVLHSFTAVCQDDGTWHR	0.72	-0.361	-1.63	0.11159	2.66	0.11159	1.11024	0.84002	-0.19365	0.19309	-0.08342	-0.08814	1.13535	1.03133	0.38347	0.45731	0.70966	0.97228	0.31763	0.1072	0.48814	0.75558	NA	NA	0.657965	NA	0.499715	0.272825	1.19025	1.25347	0.40951	NA	0.3025	0.702205	0.6432	0.67596	2.42943	2.23093	0.72754	0.953145	0.3817	0.30365	0.535685	0.78408	1.60321	1.30503
C1R_HUMAN	LFGEVTSPLFPKPYPNNFETTTVITVPTGYR	0.12	-0.348	-1.14	0.26328	1.29	0.26328	0.461	-0.42986	0.31742	0.51824	NA	NA	-0.53401	-0.561535	-0.16774	-0.07319	0.34237	0.40017	-0.19546	-0.49404	-0.00565	-0.21195	NA	NA	-0.460655	-0.11026	-0.696805	-0.982175	0.00859	0.45165	-0.87433	-1.17278	0.23251	0.622025	0.75632	0.40712	1.91938	1.88492	0.22564	-0.056075	0.27311	-0.03734	-0.107855	0.72684	0.74388	1.12458
C1RL_HUMAN	GSEAINAPGDNPAK	-6.48	-0.103	-0.11	0.91923	0.01	0.91923	NA	NA	NA	NA	NA	NA	NA	NA	NA	NA	NA	NA	NA	NA	NA	NA	NA	-6.53087	NA	NA	NA	NA	NA	NA	NA	NA	-6.42833	NA	NA	NA	NA	NA	NA	NA	NA	NA	NA	NA	NA	NA
C1RL_HUMAN	WILTAAHTIYPK	2.35	-0.419	-2.3	0.02654	5.29	0.02654	2.67445	2.35993	2.14746	2.13991	1.49095	1.3457	2.38737	2.40131	2.2061	1.9717	2.66726	2.55041	2.14947	2.06086	2.27563	2.32618	1.68443	1.4643	2.15997	2.4232	2.21062	2.18818	2.94339	3.04805	1.98325	1.8354	1.90387	1.94834	2.55015	2.51565	3.85384	3.71154	2.37994	2.40878	2.40191	2.25748	2.49731	2.41132	3.01585	3.20329
C1RL_HUMAN	LGNFPWQAFTSIHGR	-1.5	-0.586	-1.62	0.12157	2.63	0.12157	NA	NA	-2.05892	NA	NA	NA	NA	NA	-2.5174	-2.64731	-1.06501	-1.31296	-1.29011	-1.64323	NA	-1.67905	NA	NA	NA	NA	NA	NA	NA	NA	NA	NA	-0.21994	NA	NA	-1.45006	-0.80989	-0.543385	-1.86796	-2.27773	NA	NA	-1.64699	-1.18885	NA	-1.34997
C1S_HUMAN	SDFSNEER	-3.43	NA	NA	NA	NA	NA	NA	NA	NA	NA	NA	NA	NA	NA	NA	NA	NA	NA	NA	NA	NA	NA	NA	NA	NA	NA	NA	NA	NA	NA	NA	NA	-5.35647	NA	NA	NA	-2.63867	-2.28722	NA	NA	NA	NA	NA	NA	NA	NA
C1S_HUMAN	IIGGSDADIK	1.61	-0.181	-0.94	0.3519	0.89	0.3519	1.02387	1.76652	1.04537	1.19759	1.3226	1.53739	1.62729	1.51642	1.40378	1.4407	1.40579	1.50167	1.38401	1.4726	1.50754	1.41256	1.89837	2.12552	1.77575	1.99274	1.19464	1.22836	2.01214	2.23337	1.07608	1.54706	NA	1.46842	1.63667	1.60376	2.45519	2.68422	1.45103	1.6016	1.35199	1.32939	1.8659	1.39228	2.01947	2.32375
C1S_HUMAN	CVPVCGVPR	-1.01	-0.164	-0.65	0.51733	0.43	0.51733	-0.97548	-0.49457	-2.07328	-1.94917	-0.94338	-0.98022	-0.95267	-0.895485	-1.69087	-1.69958	-1.36597	-1.4118	-1.58727	-1.3926	-1.22455	-0.69214	-0.32616	-0.06495	-0.746975	-0.2622	-1.45013	-1.36007	-0.32436	-0.11728	NA	NA	-2.119	-1.8297	-1.1783	-1.25776	0.08124	0.362495	-1.27687	-1.03967	-1.38724	-1.6262	-0.975055	-0.95574	0.03835	-0.182085
C1S_HUMAN	NYVDWIMK	1.49	-0.297	-1.55	0.12828	2.41	0.12828	1.71429	1.5513	1.22438	1.19927	0.81229	0.23465	1.31879	1.42332	1.17463	0.84563	1.68692	1.58719	1.60714	1.43533	1.68207	1.76314	1.17468	0.72605	1.79961	1.91568	1.40233	1.30004	1.82983	1.94494	1.30398	0.99242	1.28739	1.36438	1.5076	1.57081	2.70716	2.71744	1.50451	1.54943	1.30283	1.11014	1.42033	1.6427	2.18879	2.17774
C1S_HUMAN	YHGDPMPCPK	-1.47	-0.21	-0.78	0.44177	0.6	0.44177	-1.31212	-1.82435	-1.65465	-1.94562	-2.74756	-3.61301	-1.42282	-1.23991	-1.66744	-2.09041	-1.52405	-1.09543	-1.56466	-1.80285	-1.0922	-1.11407	-1.08781	-1.38902	-0.722975	-0.64919	-1.8056	-1.80642	-0.68383	-0.66687	-1.72353	-2.16717	-2.1565	-1.59824	-1.45863	-1.49859	0.01197	-0.154265	-1.43136	-1.62135	-1.86356	-1.99241	-1.69802	-1.38053	-0.89675	-0.768415
C1S_HUMAN	TNFDNDIALVR	2.87	-0.136	-0.71	0.48465	0.5	0.48465	2.9643	3.23995	2.28797	2.52499	2.4352	2.45001	2.65016	3.00773	2.86812	2.6733	2.74212	3.14058	2.61411	2.98081	2.62131	2.71619	2.84629	3.28311	2.88227	3.19442	2.51405	2.75142	2.9009	3.46094	2.58375	2.83421	2.64396	2.44403	2.88486	2.86165	3.76279	3.90489	2.49559	2.81151	2.63128	2.64163	2.83656	2.97226	3.29074	3.62169
C1S_HUMAN	EDTPNSVWEPAK	2.46	NA	NA	NA	NA	NA	NA	NA	NA	NA	NA	NA	NA	NA	NA	NA	NA	NA	NA	NA	NA	NA	NA	NA	NA	NA	NA	NA	NA	NA	NA	NA	NA	NA	NA	NA	NA	NA	NA	NA	NA	NA	NA	NA	NA	2.46209
C1S_HUMAN	GDSGGAFAVQDPNDK	0.81	0.027	0.12	0.90604	0.01	0.90604	0.62245	0.95608	-0.11446	0.45844	0.41894	0.44633	0.99324	1.04239	0.92883	0.69197	0.54169	1.02712	0.56057	0.89653	0.88491	0.65803	1.11396	1.42118	1.27998	1.63564	0.343625	0.656805	1.23911	1.16603	0.01793	0.1662	0.22926	0.807725	0.58078	0.77889	1.87296	2.14688	0.40095	0.794975	0.12324	0.43897	0.852585	0.76897	1.07743	1.4547
C1S_HUMAN	VEDPESTLFGSVIR	1.4	-0.148	-0.76	0.45278	0.57	0.45278	1.99101	1.91109	0.73058	1.07959	0.98046	1.05423	1.22418	1.62909	1.23334	1.12891	1.25504	1.47686	1.13711	1.00749	1.11263	1.25877	1.40738	1.71702	1.46921	1.73052	1.17169	1.44437	1.41108	1.80115	1.15757	1.44854	0.80621	1.03242	1.48277	1.3803	2.63684	2.50798	1.09327	1.2107	0.97434	0.83695	1.09933	1.37651	2.36482	2.25057
C1S_HUMAN	VGATSFYSTCQSNGK	1.42	-0.048	-0.24	0.80819	0.06	0.80819	1.36654	1.63282	0.77599	1.08528	0.98238	1.02295	1.57063	1.34909	1.37206	1.27972	1.18198	1.55594	1.26542	1.49	1.31913	1.35727	1.74971	1.81124	1.72897	1.97591	1.05649	0.964765	1.76406	1.52989	1.16648	1.332	0.45966	0.856565	1.36626	1.46552	2.27301	2.72637	1.15378	1.42378	0.94422	1.13166	1.35421	1.42568	2.07419	2.35865
C1S_HUMAN	MLTPEHVFIHPGWK	1.22	-0.048	-0.17	0.87013	0.03	0.87013	1.50979	0.94015	1.24605	NA	NA	NA	0.86554	1.50229	NA	NA	NA	NA	0.93273	NA	NA	0.90221	NA	NA	1.21016	1.32732	0.706805	NA	0.7944	1.25378	0.74157	NA	NA	NA	1.28045	NA	2.13118	1.85014	0.6746	NA	NA	NA	NA	1.33984	1.42611	1.72311
C1S_HUMAN	SNALDIIFQTDLTGQK	1.24	-0.32	-1.21	0.23424	1.46	0.23424	1.57876	1.81585	0.67252	0.22414	0.5528	0.63195	1.59008	1.26022	1.18586	1.19692	1.24583	0.93757	1.07195	1.00153	1.48148	1.0122	0.77859	-0.17004	1.89549	1.54794	1.31699	0.677225	2.01476	1.58181	0.93208	1.09351	1.07062	0.903935	1.30552	1.18987	2.45432	2.34036	1.67952	1.50682	0.56259	0.15346	1.10787	1.04847	2.37197	2.60066
C1S_HUMAN	SNALDIIFQTDLTGQKK	-2.4	-0.49	-1.16	0.25985	1.35	0.25985	-3.05515	-1.85874	NA	NA	-3.11148	-2.86431	-2.31618	-2.12162	NA	-2.48515	NA	-3.13322	NA	-2.98229	NA	NA	NA	NA	-2.45368	NA	NA	NA	NA	-2.32026	NA	NA	-3.41204	NA	NA	NA	-1.22999	-0.924965	NA	NA	-2.30296	-2.28599	NA	NA	NA	-1.88684
C1S_HUMAN	QFGPYCGHGFPGPLNIETK	2.18	-0.114	-0.75	0.45459	0.57	0.45459	2.54973	2.49574	1.92049	2.28955	1.5058	1.41395	2.21128	2.43481	2.19035	2.07932	2.32133	2.45289	2.05796	2.02007	2.10746	2.1168	1.70878	1.68788	2.36319	2.59024	1.87603	1.85939	2.13265	2.35536	1.89083	1.85659	1.90341	2.02852	2.1371	2.13025	3.01234	3.0225	2.09758	2.23823	2.43899	2.25455	2.1534	2.16295	2.75076	2.50108
C1S_HUMAN	SSNNPHSPIVEEFQVPYNK	3.12	-0.109	-0.62	0.53965	0.38	0.53965	3.26196	3.28904	2.56322	2.81546	2.56018	2.51187	3.17305	3.37889	3.05409	2.86379	3.14987	3.49504	2.76679	3.03285	2.86767	2.9344	3.19177	3.3379	3.32356	3.60637	2.84508	2.9516	3.14663	3.58463	NA	2.78912	NA	NA	3.03684	3.05507	3.91559	4.00861	2.74839	3.02441	2.92511	2.85766	3.00732	3.10772	3.44156	3.71566
C1S_HUMAN	VEKPTADAEAYVFTPNMICAGGEK	0.64	-0.241	-1.19	0.24198	1.41	0.24198	0.93299	1.1131	0.33747	0.44126	-0.5806	-0.21831	0.68428	1.05773	0.6018	0.02537	0.60865	0.65482	0.53683	0.38754	0.31764	0.57226	0.42266	0.25583	1.06757	1.09579	0.423765	0.608265	0.77899	1.03161	0.24563	0.23795	0.39123	0.836105	0.77648	0.83814	1.85756	1.64288	0.44993	0.522365	0.65142	0.45007	0.149155	0.5806	1.41882	1.25304
C1S_HUMAN	MGPTVSPICLPGTSSDYNLMDGDLGLISGWGR	-0.41	-0.15	-0.33	0.74689	0.11	0.74689	NA	NA	0.47504	0.28396	NA	NA	NA	-1.05055	-0.92775	-1.70901	-0.18312	-0.01967	-0.65519	-1.23349	-0.61418	0.21133	NA	NA	-1.34586	-0.43738	NA	NA	-1.32857	-0.43101	-2.24096	NA	0.0303	0.792525	0.06542	0.11288	0.29542	0.570115	-0.74809	-0.096075	-1.5078	NA	-1.00751	-0.54343	0.31945	1.1548
C99L2_HUMAN	DLEDIVGGGEYKPDK	-0.24	0.558	2.15	0.03908	4.6	0.03908	-0.24643	-0.13129	0.42263	0.87545	-0.31775	0.05733	-0.17915	0.063165	0.43607	0.30106	-0.60003	NA	-0.50193	-0.08292	0.01112	NA	-0.10212	0.31141	0.103055	NA	NA	-0.040385	-0.80976	NA	-0.74423	-0.71379	-2.31957	NA	0.2025	-0.08864	-1.44673	-0.763495	-0.06191	0.234905	-0.66733	-0.57289	0.200525	NA	-0.51514	-0.190345
C99L2_HUMAN	APAKPPGSGLDLADALDDQDDGR	-2.33	-0.437	-0.6	0.56858	0.36	0.56858	-2.65931	NA	NA	-1.54251	NA	NA	-3.03169	NA	NA	NA	NA	NA	NA	NA	NA	NA	NA	NA	NA	-2.42634	NA	NA	NA	NA	NA	NA	NA	NA	NA	NA	NA	NA	NA	-1.97843	NA	NA	NA	NA	NA	NA
CA2D1_HUMAN	LEETITQAR	-0.64	0.59	1.2	0.26192	1.45	0.26192	NA	NA	-0.71168	-0.2888	NA	NA	NA	NA	NA	NA	NA	NA	NA	NA	NA	NA	NA	-0.03291	NA	NA	NA	NA	NA	NA	NA	-1.00915	NA	NA	NA	NA	NA	NA	NA	NA	-0.5464	NA	-0.448965	NA	-1.46618	NA
CA2D1_HUMAN	FVVTDGGITR	0.01	-0.145	-0.62	0.53664	0.39	0.53664	0.14383	0.15127	0.4341	0.63835	-0.37808	NA	-0.28399	NA	0.30803	0.01447	-0.5049	-0.12557	-0.35215	-0.27071	-0.69676	NA	0.36163	0.70439	-0.472035	NA	-0.128115	0.185125	-0.47919	0.07957	0.04093	0.14878	-1.08597	-1.15333	0.67547	0.49585	-0.69491	-0.627075	0.61169	0.548125	0.82563	0.32845	0.686905	0.12671	NA	0.219145
CA2D1_HUMAN	MQEDLVTLAK	0.4	0.402	0.81	0.43042	0.65	0.43042	NA	NA	0.64941	1.06325	NA	NA	NA	NA	0.81324	0.77858	0.37801	NA	NA	NA	NA	NA	NA	NA	NA	NA	NA	-0.198975	NA	NA	NA	NA	NA	0.582115	0.902	0.84177	-2.27679	-2.1121	1.00765	1.21348	0.54701	0.55886	0.805655	0.97304	NA	0.669985
CA2D1_HUMAN	GPIQWMACENK	-0.84	-0.108	-0.42	0.67954	0.17	0.67954	-0.42956	-0.56419	0.22277	0.28557	-2.04178	-2.02578	NA	-0.811765	-0.51153	-0.69116	-1.55932	-1.30816	-1.24239	NA	-1.51698	-1.4262	-0.52314	-0.38947	-0.942995	-0.60429	-0.781945	-0.745715	-1.15115	-0.78421	-1.17465	-0.90006	-2.78242	-2.28649	-0.02434	0.10859	-1.39053	-1.66647	-0.12384	-0.098315	-0.21818	-0.07326	-0.240475	-0.43679	-0.72808	-0.430595
CA2D1_HUMAN	SGPGAYESGIMVSK	2.74	-0.021	-0.09	0.92561	0.01	0.92561	2.43018	2.18694	1.45352	1.76143	3.0317	3.06411	2.42737	2.68617	2.81545	2.53121	3.07216	3.15785	3.00509	2.80179	2.46853	2.48249	3.35056	3.48809	3.15334	3.27395	3.44279	3.56319	3.10629	3.22886	2.99652	2.99594	3.84803	3.92786	1.74307	1.76878	3.58101	3.46625	1.87776	1.65203	2.15087	2.26514	2.13878	2.15957	2.54733	2.60598
CA2D1_HUMAN	YYPASPWVDNSR	-1.35	-0.327	-1.3	0.20173	1.69	0.20173	-1.56298	-1.65207	-0.48276	-0.51649	-2.32696	-2.60954	NA	-1.16673	-0.9798	-1.40551	-2.14273	-1.50835	NA	-1.74007	-1.88801	-1.74835	-1.20253	-1.15735	-1.52964	-1.50538	-1.25002	-1.93331	-1.86116	-1.68214	-1.24296	NA	NA	NA	-0.70378	-0.62404	NA	NA	-0.82876	-0.661685	-0.61088	-0.7996	-0.773785	-0.76185	-2.11495	-1.73301
CA2D1_HUMAN	IKPVFIEDANFGR	1.49	NA	NA	NA	NA	NA	NA	NA	NA	NA	NA	NA	NA	NA	NA	NA	NA	NA	NA	NA	NA	NA	NA	NA	NA	NA	NA	NA	NA	NA	NA	NA	NA	NA	NA	NA	NA	NA	NA	NA	1.46395	1.50865	NA	NA	NA	NA
CA2D1_HUMAN	TASGVNQLVDIYEK	0.57	0.068	0.29	0.77672	0.08	0.77672	0.73483	1.17136	1.16993	1.47178	0.13003	0.25069	0.4405	0.893545	0.86438	0.76222	-0.05577	0.16178	0.12122	0.49616	-0.10734	0.13135	1.03354	1.30161	0.301925	0.72982	0.501395	0.796895	-0.14126	0.5838	0.39335	0.67436	-0.77598	-0.412335	1.11952	1.11404	-0.30582	-0.038985	0.90193	1.21531	0.97533	1.09131	0.744465	0.89685	0.49958	0.810445
CA2D1_HUMAN	VFTFSVGQHNYDR	0.25	-0.215	-0.38	0.72181	0.14	0.72181	NA	NA	NA	NA	-0.22457	NA	NA	NA	NA	NA	NA	NA	NA	NA	NA	NA	0.50519	NA	NA	NA	NA	0.343455	NA	NA	NA	NA	NA	NA	NA	NA	NA	NA	NA	NA	NA	NA	0.366375	NA	NA	NA
CA2D1_HUMAN	YQDLYTVEPNNAR	-1.47	NA	NA	NA	NA	NA	NA	NA	NA	NA	NA	NA	NA	NA	NA	NA	NA	NA	NA	NA	NA	NA	NA	NA	NA	NA	NA	NA	NA	NA	NA	NA	NA	NA	NA	NA	NA	NA	NA	NA	NA	-1.46545	NA	NA	NA	NA
CA2D1_HUMAN	TPNNPSCNADLINR	-3.19	0.676	0.66	0.53371	0.44	0.53371	NA	NA	NA	NA	NA	NA	NA	NA	NA	NA	NA	NA	NA	NA	NA	NA	-3.14391	-2.55524	NA	NA	-4.3777	NA	NA	NA	NA	NA	NA	NA	NA	NA	NA	NA	NA	NA	NA	-2.67259	NA	NA	NA	NA
CA2D1_HUMAN	VLLDAGFTNELVQNYWSK	-2.63	-0.039	-0.07	0.94145	0.01	0.94145	NA	-2.96226	-0.87116	-0.82429	NA	NA	-3.02603	-4.31362	-2.63843	-2.78401	-2.37982	-3.04594	-3.21708	-3.5413	-3.10881	-3.63134	NA	NA	NA	NA	NA	NA	NA	-4.52098	-3.61287	NA	-4.13283	NA	-1.641	-2.20343	NA	-3.427	-1.07927	-1.95206	-1.02143	-2.17163	-1.85437	-1.73975	NA	-2.77485
CA2D1_HUMAN	LLIQAEQTSDGPNPCDMVK	-1.81	NA	NA	NA	NA	NA	NA	NA	NA	NA	NA	NA	NA	NA	NA	NA	NA	NA	NA	NA	NA	NA	NA	NA	NA	NA	NA	NA	NA	-2.58442	NA	NA	NA	NA	-2.22319	-1.58524	NA	NA	NA	-0.837055	NA	NA	NA	NA	NA	NA
CA2D1_HUMAN	SQEPVTLDFLDAELENDIK	-0.61	-0.055	-0.16	0.87546	0.02	0.87546	-0.86645	-0.12895	0.40615	0.84463	-1.99457	-0.99204	-0.74574	-0.939225	-0.3682	0.17429	-0.78483	-1.01737	-0.62611	-0.98763	-1.01474	-0.83236	-0.69525	-1.5133	-0.417525	-0.9883	-0.374775	-1.01215	-1.38564	-1.31144	-1.02962	-0.24948	NA	-2.26999	-0.1247	-0.29954	-1.47937	-1.53744	0.66982	0.648985	0.46755	0.02375	-0.129785	0.0944	-0.94294	-0.154895
CA2D1_HUMAN	INTQEYLDVLGRPMVLAGDK	0.45	-0.287	-1.29	0.20401	1.67	0.20401	NA	0.78695	1.13834	1.38368	-0.35261	NA	0.3496	0.449375	0.71896	0.60113	-0.06918	0.18272	-0.06345	-0.07212	-0.15573	0.04126	-0.02458	-0.28014	0.123125	0.43586	0.876395	0.657305	0.37019	0.25123	0.19279	0.40396	NA	-0.393925	1.28182	1.33032	-0.48905	-0.266155	1.26083	1.24328	1.16121	1.01954	0.661245	0.91165	NA	NA
CA2D1_HUMAN	NREEDPSLLWQVFGSATGLAR	0.06	-0.277	-1.04	0.30255	1.09	0.30255	-0.16579	-0.20186	1.23067	1.48427	-1.42453	-1.58023	-0.32913	0.100595	0.52372	-0.04721	0.12016	0.2254	-0.1653	-0.15152	-0.37227	-0.12105	NA	NA	-0.228895	-0.4414	-0.509235	-0.395065	-0.14287	-0.32566	-0.48986	-0.14959	-0.51764	-0.348705	0.98654	0.89623	-0.51527	-0.547285	0.97323	0.961055	1.00082	0.92652	0.766745	1.21064	-0.13328	0.176385
CAB45_HUMAN	DLGGFDEDAEPR	-0.4	0.238	0.94	0.35412	0.88	0.35412	-0.11104	0.04554	-1.47456	-0.56255	-0.13364	NA	-0.58091	-0.223285	-0.07746	-0.20328	-1.04149	-0.59027	-0.61051	-0.32864	-0.11616	-0.12134	0.18059	0.62906	-0.502605	0.12282	-0.614085	-0.203195	-0.63435	0.05506	-0.52748	-0.05546	NA	-1.35642	-0.48245	-0.44162	-0.67755	-0.434275	-0.67354	-0.233295	-0.55541	-1.00646	-0.545105	-0.60528	-0.17689	NA
CAD13_HUMAN	VNSDGGLVALR	1.61	0.128	0.46	0.64496	0.22	0.64496	1.74545	NA	2.3682	2.6687	1.29152	1.375	1.25427	1.52255	2.06519	1.95345	1.03103	1.557	1.29335	1.48144	0.9833	1.1487	2.35312	2.82702	1.16087	NA	1.59489	1.94294	1.06286	NA	1.16936	1.42772	-0.42947	-0.259595	2.02755	2.26209	0.65196	0.867485	1.95386	2.25348	2.50334	2.59996	2.35279	2.28339	1.54756	NA
CAD13_HUMAN	YEVSSPYFK	1.71	0.014	0.06	0.95286	0	0.95286	1.6358	1.79059	2.73685	2.81103	1.2256	1.09571	1.38509	1.67315	2.19684	2.01275	1.35551	1.48518	1.52011	1.71317	1.22185	1.22942	2.24862	2.41436	1.06627	1.52759	1.82279	1.97364	1.23009	1.61343	1.46296	1.62055	0.12929	0.221655	2.27436	2.22881	0.88795	1.06107	2.14815	2.31419	2.5898	2.6752	2.27988	2.44535	1.39722	1.69494
CAD13_HUMAN	DIQGSLQDIFK	2.53	0.069	0.26	0.79279	0.07	0.79279	2.4507	3.02824	3.10722	3.60867	2.13957	2.36423	2.37782	2.54249	2.99052	2.97122	2.09455	2.5017	2.41311	2.64149	1.80104	2.10156	2.93156	2.99079	1.97443	2.35372	2.83148	2.58107	1.8803	2.13054	2.43051	2.52898	0.6223	1.31844	3.04289	3.23244	1.38559	1.85184	3.09172	3.254	3.41629	3.39802	2.88898	3.12294	2.29859	2.69029
CAD13_HUMAN	INENTGSVSVTR	-2.89	-0.237	-0.55	0.59249	0.3	0.59249	NA	NA	-2.28129	-2.11468	NA	NA	NA	NA	-2.89264	NA	NA	-3.56458	NA	NA	-4.31744	NA	NA	-2.35158	NA	NA	NA	NA	NA	NA	NA	NA	NA	NA	-3.36039	-3.11171	NA	NA	-3.37914	-2.93872	-2.55945	-2.3575	-2.35277	NA	NA	NA
CAD13_HUMAN	SIVVSPILIPENQR	-1.13	-0.579	-1.69	0.09928	2.87	0.09928	-1.71373	-1.25962	-0.23678	-0.00119	-3.08605	NA	-1.91156	-1.71371	-0.74378	-0.87829	-1.7156	-1.45786	-1.38388	-1.73214	-1.44567	-1.63919	-0.28617	0.32464	-2.55959	-2.08993	-0.971505	-0.740395	NA	NA	-1.85572	-1.458	NA	NA	-0.30337	-0.43001	NA	NA	-0.61834	-0.356375	0.10164	-0.16998	-0.531905	-0.55175	-1.69478	-2.14376
CAD13_HUMAN	TPHAEDMAELVIVGGK	1.14	-0.302	-0.86	0.39284	0.75	0.39284	1.91103	NA	-1.30289	NA	0.63574	NA	1.47679	1.4505	1.74291	1.43513	0.93115	0.44308	0.64127	0.92256	0.24845	0.2891	1.9692	1.84037	0.985345	1.27511	1.71422	1.72253	NA	1.37759	1.30167	1.20462	-0.78615	-1.4622	1.4668	1.25924	-0.09533	NA	1.91271	1.96914	2.20252	2.07538	2.04454	1.61451	1.71494	1.71601
CAD13_HUMAN	TLEGPVPLEVIVIDQNDNRPIFR	-1.2	-0.167	-0.43	0.66983	0.19	0.66983	NA	NA	0.41232	0.2762	NA	NA	-2.48648	-1.92782	-0.73891	-0.9145	NA	-1.20838	-1.59433	-1.39414	-1.67126	-1.45101	NA	NA	-2.5806	-2.573	-1.638	NA	NA	NA	NA	-2.4508	NA	NA	-0.12276	-0.2602	-2.06656	-2.04385	-0.73708	-0.714565	0.07625	0.0165	-0.956575	-0.40189	-2.10322	NA
CADH2_HUMAN	FLIYAQDK	0.7	0.237	1.57	0.12431	2.46	0.12431	0.80632	0.69428	1.2026	1.19216	0.45539	0.50443	0.5417	0.639445	0.94506	0.85699	0.59627	0.54753	0.67329	0.83429	0.8753	0.98511	0.86311	1.14441	0.969715	1.08915	0.856005	0.916645	0.10076	0.54613	0.30868	0.43954	-0.22743	-0.269675	0.91658	0.99338	0.13089	0.083635	1.03738	1.1942	0.83883	0.69555	0.944455	0.87725	0.58195	0.704625
CADH2_HUMAN	SFPLSSEHAK	-1.7	0.308	1.27	0.21021	1.62	0.21021	-2.35935	-1.62927	-0.83976	-0.83568	-2.17185	-2.20662	-1.47966	-1.60147	-1.78328	-1.59958	-1.81141	-1.5132	-1.68159	-1.29679	-1.45384	-1.325	-1.10851	-1.26291	-1.5941	-1.29892	-1.96307	-1.95566	-2.41065	-2.24645	-2.06506	-1.6567	-3.25275	-2.65199	-1.15407	-1.09669	-2.62155	-2.51258	-1.24694	-1.01262	-1.15659	-1.17131	-1.11715	-1.24422	-2.58532	-1.90124
CADH2_HUMAN	VDEDGMVYAVR	1.54	0.136	0.69	0.49515	0.48	0.49515	1.45523	NA	1.85128	2.04302	NA	NA	1.15203	NA	1.72552	1.43743	1.34433	1.56616	1.55941	1.65629	1.43538	NA	NA	NA	1.72232	NA	1.49172	1.59919	NA	NA	1.06407	NA	0.60103	NA	1.82666	1.62071	NA	NA	1.73319	1.84923	1.55148	1.33622	1.55844	1.68317	NA	NA
CADH2_HUMAN	DVHEGQPLLNVK	2.2	0.33	1.34	0.19373	1.8	0.19373	NA	2.28689	2.47271	2.52245	NA	NA	NA	NA	2.17025	NA	1.94202	2.25306	2.26324	NA	NA	NA	NA	2.69761	NA	2.56852	NA	NA	NA	2.00096	NA	NA	NA	1.11759	NA	2.39224	1.20766	1.66498	2.478	2.61339	2.23638	2.34056	2.50079	2.34355	NA	NA
CADH2_HUMAN	VQYESSEPADFK	0.33	0.264	0.6	0.55381	0.36	0.55381	0.46126	0.90189	NA	NA	0.35253	0.45483	NA	0.335405	NA	-0.54969	NA	-0.0675	0.55949	0.72703	-1.04505	0.68218	0.96828	1.08416	0.675095	1.17063	1.39092	0.307125	-0.48993	0.31485	0.13777	0.09732	NA	-1.01223	NA	NA	-0.3059	NA	NA	0.927995	NA	NA	NA	NA	0.04938	0.347905
CADH2_HUMAN	ESAEVEEIVFPR	2.65	0.282	1.23	0.22743	1.52	0.22743	3.00431	3.19899	NA	2.83823	2.56769	2.73011	2.57811	2.59377	NA	NA	1.99451	NA	2.56217	2.36443	3.2642	2.91478	2.8446	3.04953	2.83772	2.6781	3.44176	3.5292	NA	2.65123	NA	NA	NA	1.31593	NA	NA	NA	1.96799	3.1	2.91066	2.40391	2.48588	NA	2.61846	1.89887	1.92085
CADH2_HUMAN	LSLKPTLTEESVK	1.91	0.34	1.62	0.11411	2.62	0.11411	1.77832	2.22147	2.31731	2.68135	1.27199	1.3826	1.9165	2.06286	2.30654	2.08546	NA	2.13023	1.9139	2.1292	1.91039	2.00083	1.87914	2.27021	1.97436	2.33098	1.81804	2.06591	1.01904	NA	1.19822	1.56009	NA	0.978495	2.39234	2.07431	1.30264	1.38739	2.33445	2.54232	NA	NA	2.25504	2.37894	1.41886	1.51623
CADH2_HUMAN	TGFPEDVYSAVLSK	0.06	0.208	1.22	0.22893	1.49	0.22893	0.26385	0.2342	0.60546	0.69252	-0.27365	-0.42739	-0.04342	0.095035	0.17853	0.03515	0.08759	0.4734	0.29718	0.25476	0.27273	0.17772	-0.07918	0.16308	0.078765	0.23269	-0.140355	0.150005	-1.09502	-0.78653	-0.09325	-0.24555	-0.66876	-0.381435	0.38939	0.44839	-0.15006	-0.307745	0.43682	0.416925	0.28765	0.38825	0.141245	0.50348	-0.23262	0.088805
CADH2_HUMAN	KVQYESSEPADFK	-1.56	0.793	2.14	0.0415	4.56	0.0415	NA	NA	-1.03985	-1.544	-1.32994	NA	NA	-1.18122	-1.18956	NA	-2.17176	NA	-2.28168	-1.80056	-0.54876	-1.52396	-0.10763	-0.70034	-1.0287	-0.43102	NA	NA	NA	NA	NA	-2.12769	NA	-3.58883	-1.14626	-1.86392	-2.42696	-2.75448	-0.97029	-0.839615	-1.45907	-1.27399	NA	-2.12596	-2.19508	-2.46399
CADH4_HUMAN	VGADGTVFATR	-2.34	-0.079	-0.28	0.77876	0.08	0.77876	-3.45171	-2.71883	-1.81257	NA	-2.38439	NA	NA	-3.22527	-1.93301	NA	NA	-2.3083	NA	-2.7064	-2.03623	-2.53262	-2.01362	-1.59027	NA	-2.14843	-2.25778	-2.30129	NA	-2.77934	-3.11604	-2.53499	NA	NA	-1.77935	NA	NA	NA	NA	-2.07361	-1.83601	NA	-1.95012	-1.9626	NA	-2.77836
CADM1_HUMAN	SDDSVIQLLNPNR	1.63	0.316	1.55	0.12841	2.41	0.12841	2.04039	2.16516	1.3426	1.76628	1.93673	1.97213	1.42603	2.01831	1.87183	1.99002	1.57078	1.57333	1.50013	1.81261	1.8617	1.82655	1.74382	1.9971	1.32689	1.82209	1.33088	1.56011	1.04362	1.80326	1.30489	1.51924	NA	1.19162	1.76192	1.84086	0.50904	0.778335	1.83481	2.11876	1.75605	1.72193	1.65521	1.57652	1.10215	1.60103
CADM1_HUMAN	SEVEEWSDMYTVTSQLMLK	-2.69	-0.182	-0.39	0.70272	0.15	0.70272	-3.36524	NA	-1.58293	-1.66795	-4.0275	-3.74881	-2.27985	-3.95375	-2.98078	-3.29286	-2.20004	-3.16638	-2.67247	NA	-1.81318	-2.47454	NA	NA	-2.33542	NA	-3.08293	NA	-1.73116	NA	-3.02505	NA	NA	NA	-2.40355	-2.4132	NA	NA	-1.14598	-2.52119	-2.65314	-3.18549	-1.99743	-2.6938	-3.06457	-3.71374
CADM1_HUMAN	EDDGVPVICQVEHPAVTGNLQTQR	-0.16	0.286	1.23	0.22605	1.52	0.22605	0.15015	0.46497	-0.20121	0.16997	0.02393	0.10725	0.2035	0.588275	0.44515	0.23857	-0.60262	-0.32688	-0.67641	-0.45986	-0.56621	-0.28713	-0.38676	0.13856	-0.130925	0.39758	-0.420565	-0.303465	-0.70838	-0.07749	-0.66646	-0.31003	NA	NA	-0.35097	-0.37903	NA	NA	-0.2476	0.100065	-0.30841	-0.02255	-0.497795	-0.17487	-0.70237	-0.074805
CADM1_HUMAN	EGDALELTCEAIGKPQPVMVTWVR	1.68	-0.044	-0.15	0.88088	0.02	0.88088	1.66847	1.76861	2.22415	2.49258	1.35588	1.29229	1.66293	1.85627	2.16412	2.1819	1.84541	2.1215	1.96453	2.04366	1.92894	2.38936	0.33323	-0.80362	1.24011	1.48154	1.54134	1.35475	1.50054	1.61651	1.4211	1.28649	0.69401	1.30526	2.30835	2.45486	0.97019	1.32889	2.55156	2.58067	2.29545	1.85878	1.92281	2.4893	1.02816	1.57923
CADM1_HUMAN	VHKEDDGVPVICQVEHPAVTGNLQTQR	-0.5	0.262	1.01	0.31997	1.02	0.31997	0.24683	0.07971	-1.04992	-0.68061	0.15481	-0.07919	-0.03579	0.597695	-0.19693	-0.82134	NA	-1.07846	-1.1571	-0.55918	-0.83201	-0.84376	-0.11	-0.01004	-0.812465	-0.22975	-0.912625	-0.515515	-0.49762	-0.12857	-0.47323	-0.5461	NA	-1.90136	-0.58931	-0.65206	NA	NA	-0.48245	-0.031865	-0.02488	-0.23677	-0.607105	-0.64046	-1.30148	-1.03659
CADM2_HUMAN	SDDGVAVICR	-1.57	0.06	0.24	0.81139	0.06	0.81139	NA	-2.05839	-1.57584	-1.16795	NA	NA	NA	NA	-1.61925	-1.62153	NA	NA	NA	NA	-1.48726	NA	-1.08138	NA	-1.9007	-1.6154	-2.02409	-1.65775	NA	NA	NA	NA	NA	NA	-1.68373	-1.61875	NA	NA	-1.39767	-1.18894	-1.17391	-1.15881	NA	-1.65688	NA	-2.18819
CADM2_HUMAN	GKPLPEPVLWTK	-0.72	0.192	0.62	0.53665	0.39	0.53665	-0.33091	-0.75509	-0.0593	-0.13087	-1.16658	-1.32334	-0.65346	NA	-0.81449	NA	-1.38501	NA	NA	-1.11781	-0.6885	-0.61691	-0.35453	-0.39516	NA	-0.57042	-0.315405	-0.378965	-1.36644	-0.68886	-1.07581	NA	-3.43467	NA	-0.21843	-0.50032	-2.09376	NA	-0.36274	-0.297075	0.29247	-0.27792	-0.124245	-0.1174	-0.89113	-0.799815
CADM2_HUMAN	IIPSTPFPQEGQPLILTCESK	0.69	0.318	1.01	0.31779	1.02	0.31779	1.58465	0.59977	0.63744	0.89558	1.02361	0.88501	1.48044	0.637455	0.50576	0.91161	0.62242	0.15838	0.165	0.2824	1.42449	0.89754	1.4712	0.93554	1.02408	0.92005	0.740345	0.554625	0.8349	0.15436	0.36892	0.21601	-1.2123	-0.229045	1.00905	1.15474	-0.99075	-1.03442	1.16535	1.37533	1.12424	1.11663	1.14834	1.05436	1.38226	0.779065
CADM2_HUMAN	AYLTVLGVPEKPQISGFSSPVMEGDLMQLTCK	-1.15	-0.356	-0.65	0.52474	0.42	0.52474	NA	NA	0.32547	0.13892	NA	NA	NA	NA	-1.83531	-1.8449	-2.30667	NA	NA	NA	NA	-1.4737	NA	NA	NA	-2.24392	NA	NA	NA	NA	NA	NA	NA	NA	-0.59854	-0.72384	NA	NA	-0.78097	NA	-0.24665	-0.42602	-1.6842	-0.74082	-2.84352	NA
CADM3_HUMAN	LLLHCEGR	-0.25	-0.149	-0.17	0.86861	0.03	0.86861	-0.72192	-0.12636	0.75585	0.97223	0.25171	0.17387	-4.56996	-0.240615	0.50366	0.38654	-0.58016	-0.06539	-0.2579	0.03479	0.16652	0.27782	0.50437	0.79259	-5.28998	0.29755	0.303955	0.653305	-0.14376	0.06074	-2.16003	-0.56963	-1.75726	-1.27263	0.73603	0.62319	-0.99383	NA	0.50277	0.648145	0.17489	0.241	0.842855	0.64553	-0.83127	-0.597185
CADM3_HUMAN	KGDQELHGEPTR	-6.79	0.482	0.89	0.40274	0.79	0.40274	NA	NA	NA	-6.78717	NA	NA	-5.93204	NA	NA	NA	NA	-6.74077	NA	NA	-7.04828	NA	NA	NA	NA	NA	NA	NA	-7.70601	NA	NA	NA	NA	NA	NA	NA	NA	NA	NA	NA	NA	-6.51241	NA	NA	NA	NA
CADM3_HUMAN	GNPVPQQYLWEK	2	0.174	1.12	0.26784	1.26	0.26784	1.97408	2.20829	2.09052	2.30395	1.65496	1.63906	2.11388	2.23856	2.2666	2.03058	1.92689	2.30672	2.14786	2.29133	2.14316	2.23082	1.98053	1.96662	1.98144	2.29386	1.91149	1.93725	1.61483	2.00746	1.79773	1.81245	1.28986	1.4688	2.29013	2.18999	1.33282	1.72124	2.08026	2.31242	2.2311	2.1486	2.12189	2.38108	1.72253	1.9304
CADM3_HUMAN	EDDGASIVCSVNHESLK	1.57	0.28	1.31	0.1971	1.72	0.1971	1.68701	1.9745	1.01647	1.98803	1.36861	1.4082	1.89033	2.07085	2.03864	1.757	1.45646	1.50153	1.65585	1.9282	1.76158	1.83891	1.53993	1.98039	1.45758	1.85833	1.37057	1.58378	1.00915	1.53062	1.26216	1.35549	0.83499	0.833565	1.86138	1.84889	0.79724	1.1323	1.65983	1.9181	1.95826	1.58144	1.94304	1.76888	0.94549	1.38949
CADM3_HUMAN	SLVTVLGIPQKPIITGYK	2.45	0.088	0.31	0.76196	0.09	0.76196	2.54386	1.93087	2.96755	2.91922	NA	NA	1.61176	2.55199	2.8557	2.80844	2.74714	2.83913	2.918	2.7119	2.30898	2.94648	NA	1.66748	2.12499	2.36184	2.25339	1.8058	NA	NA	1.83342	1.18307	1.90207	2.13401	3.18731	3.24691	2.07649	1.90315	3.08983	3.02847	3.07789	3.05346	2.71583	3.04634	1.96259	1.54096
CADM3_HUMAN	IEVLYTPTAMIRPDPPHPR	-1.19	0.041	0.12	0.9098	0.01	0.9098	NA	-1.22279	-0.87736	NA	NA	NA	-0.85012	-0.720775	NA	NA	NA	NA	NA	NA	NA	NA	NA	-1.72181	NA	NA	NA	NA	-1.74125	-1.22342	NA	NA	NA	NA	-1.0567	NA	NA	NA	-1.234	-1.13427	-0.43366	-0.56199	-0.575305	NA	-2.29182	-2.19936
CADM3_HUMAN	DHEDSSLQWSNPAQQTLYFGEK	1.13	0.224	1.17	0.24807	1.37	0.24807	1.63228	1.4487	1.03373	1.46051	0.908	0.63478	1.65731	1.87058	1.43603	1.02786	1.16953	1.32229	1.35017	1.38529	1.44542	1.60436	0.41297	0.30933	1.17441	1.48508	0.871045	0.906395	0.67397	1.05686	0.8464	0.86474	0.14541	0.691895	1.3308	1.32004	0.64495	0.596495	1.30323	1.55983	1.36909	1.32727	0.989795	1.45691	1.09442	1.24059
CADM4_HUMAN	VWSVASTVR	0.1	-0.048	-0.27	0.79193	0.07	0.79193	0.35101	NA	-0.24981	-0.07366	0.29434	0.14324	0.0224	0.016305	-0.09491	-0.24937	-0.45415	-0.24059	0.05407	0.02562	0.15016	0.20335	0.36395	0.34369	0.327085	0.45333	0.540935	0.628655	-0.10127	0.21532	0.24614	0.42	-1.0309	-0.983695	0.00051	-0.43151	-0.229	NA	0.51351	0.547495	0.45392	-0.04098	0.505465	0.73029	0.44482	NA
CADM4_HUMAN	FQLEEFSPR	0.92	-0.007	-0.04	0.97012	0	0.97012	1.03465	1.2679	0.74654	0.73595	1.0475	1.06355	0.8734	1.04279	0.77147	0.68633	0.31437	0.37829	0.79341	0.82092	0.97859	1.12899	1.15591	1.55355	0.770285	1.23185	1.23418	1.31812	0.87804	1.17735	1.01323	1.15395	-0.41806	-0.201245	0.88347	0.73038	0.58426	0.507105	1.1389	1.24317	0.9763	1.10181	1.33681	1.36615	1.09316	1.41172
CADM4_HUMAN	QTQYVLDVQYSPTAR	0.14	0.1	0.09	0.93163	0.01	0.93163	0.78439	NA	0.86553	NA	NA	NA	NA	NA	NA	NA	0.61992	NA	NA	0.01596	-2.74242	0.77516	NA	NA	1.08152	NA	NA	NA	NA	NA	NA	NA	NA	NA	NA	1.13604	NA	NA	0.62101	1.02663	NA	0.97511	NA	NA	-1.49167	-1.90105
CADM4_HUMAN	LHQYDGSIVVIQNPAR	0.89	-0.044	-0.23	0.81738	0.05	0.81738	0.99768	0.77751	0.45682	0.95636	NA	0.7379	1.04647	1.13611	NA	0.74275	NA	0.76572	0.60627	0.77265	1.05591	1.01979	NA	NA	NA	NA	NA	1.3299	NA	0.79657	0.77448	0.70776	-0.15252	NA	0.84223	0.71544	NA	NA	1.19346	1.26229	1.06647	0.98816	1.05236	1.43507	0.80669	0.925315
CADM4_HUMAN	EQAVEGGEVELSCLVPR	-1.18	-0.195	-0.67	0.50571	0.45	0.50571	-0.93947	-0.57302	-2.43635	-2.2669	-0.9458	-1.02014	-1.1175	-1.0398	-1.75895	-2.16093	NA	NA	-2.21994	-1.98133	-0.99857	-1.428	-0.808	-0.44607	-0.754035	-0.58341	-0.584945	-0.117715	-1.57424	-1.10572	-0.94724	-0.74397	NA	NA	-2.18821	-1.68469	-2.48343	NA	-1.26302	-0.625115	-0.90068	-0.70798	-0.979465	-0.74854	-0.60714	-0.467915
CADM4_HUMAN	EGDTLVLTCAVTGNPRPNQIR	-1.25	0.002	0.01	0.99528	0	0.99528	-0.78225	-0.30184	-0.85627	-0.92207	-1.29409	-1.46071	-1.39651	-1.0963	-1.41112	-1.72171	-1.42249	-1.27925	-1.37827	NA	-1.36986	-1.19942	-1.2303	-0.86574	-1.5294	-2.10426	-0.965895	-0.671985	-1.84965	-1.06647	-1.87565	-1.10742	-2.62647	-2.58457	-1.30165	-1.08218	-1.89395	-2.05857	-0.98312	-0.661945	-0.19364	-0.08965	-0.959325	-0.70942	-1.15526	NA
CAH1_HUMAN	GGPFSDSYR	-2.34	NA	NA	NA	NA	NA	NA	NA	NA	NA	NA	NA	NA	NA	NA	NA	NA	NA	NA	NA	NA	NA	-2.53188	-2.14346	NA	NA	NA	NA	NA	NA	NA	NA	NA	NA	NA	NA	NA	NA	NA	NA	NA	NA	NA	NA	NA	NA
CAH1_HUMAN	ADGLAVIGVLMK	-0.13	NA	NA	NA	NA	NA	NA	NA	NA	NA	NA	NA	NA	NA	NA	NA	NA	NA	NA	NA	NA	NA	0.0655	-0.31871	NA	NA	NA	NA	NA	NA	NA	NA	NA	NA	NA	NA	NA	NA	NA	NA	NA	NA	NA	NA	NA	NA
CAH4_HUMAN	EQILAFSQK	-2.49	0.711	0.94	0.37642	0.89	0.37642	NA	-2.75763	NA	NA	NA	-1.8521	NA	NA	NA	NA	NA	NA	NA	NA	NA	NA	-2.65099	-1.72956	NA	NA	NA	NA	NA	NA	NA	NA	NA	NA	NA	NA	NA	NA	-2.35039	NA	-3.60114	NA	NA	NA	NA	NA
CAH4_HUMAN	YLGSLTTPTCDEK	-2.86	-0.08	-0.1	0.92031	0.01	0.92031	-3.36856	-3.33581	NA	NA	-2.67673	-2.34093	NA	NA	NA	NA	NA	NA	NA	NA	NA	NA	-3.12202	-2.45435	NA	NA	NA	NA	NA	NA	NA	NA	NA	NA	NA	NA	NA	NA	-3.12167	-2.48454	NA	NA	NA	NA	NA	NA
CALL5_HUMAN	NLSEAQLR	-1	-0.104	-0.11	0.91492	0.01	0.91492	-0.18324	-0.24257	NA	-1.69054	NA	NA	NA	NA	NA	NA	NA	NA	NA	NA	NA	NA	-2.24344	NA	NA	NA	-0.593585	NA	NA	NA	NA	NA	NA	NA	NA	NA	NA	NA	NA	NA	NA	NA	-3.5178	NA	0.56387	-0.078515
CALL5_HUMAN	AFSAVDTDGNGTINAQELGAALK	-1.45	NA	NA	NA	NA	NA	-0.95403	-0.92774	NA	NA	NA	NA	NA	NA	-2.46558	NA	NA	NA	NA	NA	NA	NA	NA	NA	NA	NA	NA	NA	NA	NA	NA	NA	NA	NA	NA	NA	NA	NA	NA	NA	NA	NA	NA	NA	NA	NA
CALM_HUMAN	VFDKDGNGYISAAELR	0.22	0.045	0.23	0.82245	0.05	0.82245	0.18648	0.6076	-0.87611	-0.83209	0.49261	0.66686	0.66453	0.991045	0.64815	0.39465	0.27193	0.34283	0.16795	0.6219	0.14788	0.39048	0.39957	0.60868	-0.603015	-0.357	-0.197235	-0.056165	0.29528	0.73403	-0.06469	0.07944	0.29101	0.355885	-0.50108	-0.4591	0.91006	1.00274	0.02192	0.372385	-0.00815	-0.02905	0.408435	0.49027	0.02585	0.353415
CALM_HUMAN	EAFSLFDKDGDGTITTK	0.24	0.157	0.51	0.61525	0.26	0.61525	0.32773	0.43746	-1.67786	-1.21899	1.36708	1.57834	1.4214	1.68207	1.53496	1.42627	-0.82413	-0.47416	0.16834	0.25758	-0.32091	-0.29915	0.17976	0.45697	-0.022015	0.36157	-0.491945	-0.071055	-0.19534	0.25461	-0.73166	-0.43782	-1.76564	-1.36088	0.59681	0.59427	1.09386	1.22791	0.14716	0.553765	0.3036	0.43818	0.661335	0.89841	0.68651	0.811405
CALR_HUMAN	EQFLDGDGWTSR	0.24	0.193	0.89	0.37814	0.8	0.37814	0.06926	0.49453	0.60473	0.89046	0.05574	-0.05353	-0.24058	0.107135	0.46542	0.28917	0.63046	0.91148	0.28864	0.49336	0.35926	0.75247	NA	-0.57847	0.247425	0.69689	-0.400985	NA	NA	NA	-0.42871	-0.20491	0.12513	-0.143475	0.1587	0.21578	-0.03104	0.335925	0.24947	0.712295	0.55424	0.45072	0.759495	0.46666	-0.45646	-0.069805
CALR_HUMAN	FYALSASFEPFSNK	-1.75	-0.027	-0.08	0.9385	0.01	0.9385	NA	NA	-1.06139	-0.81215	NA	NA	-3.81112	-3.20508	-1.39198	-1.50359	-1.03505	-1.34028	-1.65994	-1.98878	-2.23007	-1.81384	NA	NA	-1.55204	-1.90301	NA	NA	NA	-2.6989	NA	NA	-1.8945	NA	-1.33204	-1.57979	NA	-2.18243	-1.05832	-1.1061	-1.72001	-1.66937	-1.87746	-1.28865	NA	NA
CALR_HUMAN	KPEDWDEEMDGEWEPPVIQNPEYK	-2.1	0.75	2.02	0.05884	4.09	0.05884	NA	NA	-1.61993	-1.30296	NA	NA	NA	NA	-2.41174	-1.96243	NA	-1.58426	-1.78888	-2.2449	-1.46982	-1.50535	NA	NA	NA	NA	NA	NA	NA	NA	NA	NA	NA	-2.12911	NA	NA	NA	-2.75264	-2.44014	NA	-2.84948	-3.33971	-2.41529	-1.72066	NA	NA
CALY_HUMAN	SILAAIGAYPLSR	-1.12	-0.038	-0.16	0.87702	0.02	0.87702	-0.63741	-0.96397	-0.277	-0.374	-1.03337	-1.22212	-1.59772	-1.13691	-0.93013	-1.15614	-1.50198	-2.04871	-0.96675	-0.79118	-1.12426	-0.72276	-1.24192	-0.94584	-2.34319	-1.75261	-0.802825	-0.639315	-1.59121	-1.29598	-1.23151	-1.28207	NA	NA	-0.77835	-0.84306	-1.75144	-2.50515	-0.63314	-0.428945	-0.9229	-1.07562	-0.886665	-0.55567	-1.25531	-1.32265
CAMKV_HUMAN	NYNQPSEVTDR	-1.81	0.244	0.65	0.51666	0.43	0.51666	-2.58981	-2.20072	-0.82789	-0.58447	NA	NA	-2.88909	-2.47309	-1.41756	-1.54326	-1.89375	-1.5844	-1.23105	-1.76424	-1.90863	-1.07375	-1.66775	-2.75963	-1.56245	-1.27445	-1.74015	-1.78822	-3.80346	NA	-2.88388	-2.62952	NA	NA	-2.23163	-2.21253	-3.03598	-2.74704	-0.60631	-0.487295	-1.07024	-1.11344	-1.71934	-0.74733	-1.82613	-1.51747
CART_HUMAN	GTSCNSFLLK	-0.49	0.202	0.27	0.79633	0.07	0.79633	NA	NA	-0.48517	-0.10993	NA	NA	NA	NA	NA	NA	NA	NA	NA	NA	NA	NA	NA	NA	NA	NA	NA	NA	NA	NA	NA	NA	NA	NA	NA	-1.33779	NA	NA	NA	0.740505	-0.63446	-0.70613	-0.487205	-0.90641	NA	NA
CART_HUMAN	ALDIYSAVDDASHEK	-2.19	NA	NA	NA	NA	NA	NA	NA	-1.58666	-1.74475	NA	NA	NA	NA	NA	NA	NA	NA	NA	NA	NA	-3.23146	NA	NA	NA	NA	NA	NA	NA	NA	NA	NA	NA	NA	NA	NA	NA	NA	NA	NA	NA	NA	NA	NA	NA	NA
CATB_HUMAN	ICEPGYSPTYK	-1.88	0.463	0.96	0.34715	0.92	0.34715	-2.18425	NA	-4.01694	-3.03853	NA	NA	NA	NA	-0.93568	-1.48943	NA	-3.09937	-1.63508	NA	-0.8966	-0.73065	-0.80735	-0.75143	-1.13495	-0.53773	NA	NA	-1.0723	NA	NA	NA	-4.37595	NA	NA	-2.46191	-1.06927	-0.734455	-1.63707	-1.2958	-3.17828	-3.10762	-3.12702	-2.48284	-1.58461	-1.47903
CATB_HUMAN	GQDHCGIESEVVAGIPR	-1.38	0.398	1.15	0.2593	1.31	0.2593	NA	-1.13262	NA	-2.35796	-1.33159	-1.33065	NA	-1.13531	-1.04476	-1.55148	-2.60538	-1.65796	-1.68791	-1.33544	-0.71971	-0.48724	-0.48917	-0.2015	-0.743995	-0.27815	NA	-2.48882	-1.12063	-0.26657	-1.5986	-1.67624	NA	NA	-2.37618	-2.92553	-0.6045	-0.164605	-1.31743	-0.833195	-2.59192	-2.3428	-2.28072	-2.34852	-1.18813	-0.798995
CATB_HUMAN	VMFTEDLKLPASFDAR	-2.02	0.199	0.45	0.66344	0.2	0.66344	-2.15268	NA	NA	NA	NA	NA	NA	NA	NA	NA	NA	NA	NA	NA	-1.79871	-1.75578	NA	NA	NA	NA	NA	NA	-2.16395	NA	-3.06057	NA	NA	NA	NA	NA	-1.46879	-1.77329	-1.90023	NA	NA	NA	NA	NA	-2.08207	NA
CATD_HUMAN	YYTVFDR	0.05	0.341	1.36	0.18261	1.86	0.18261	-0.12023	NA	NA	NA	0.03883	-0.1727	-0.32554	-0.006905	0.28187	0.19789	-0.67655	-0.66053	NA	NA	0.39044	0.47547	0.59455	0.84685	0.809195	1.21062	-0.314555	-0.069575	-0.17725	0.48216	NA	-0.21395	NA	NA	-0.59134	NA	0.01154	-0.069135	-0.37698	NA	NA	NA	-0.508135	-0.45435	0.07797	0.619595
CATD_HUMAN	VSTLPAITLK	1.13	0.356	1.54	0.13047	2.38	0.13047	1.38118	1.55609	0.22518	0.22255	1.34882	1.45569	1.17289	1.44068	1.50777	1.29201	0.45949	0.73053	0.46905	0.61742	1.49376	1.60214	2.27054	2.56603	1.97867	2.28428	1.22084	1.32224	1.31726	1.68344	1.29083	1.48465	-0.11609	-0.242575	0.80545	0.67458	1.09386	1.17895	0.73595	0.907175	0.39448	0.40418	0.495555	0.70885	1.64076	1.96342
CATD_HUMAN	LSPEDYTLK	1.11	0.352	1.35	0.1844	1.82	0.1844	1.31953	1.47218	-0.00215	0.44582	1.31051	1.47214	1.1717	1.3885	1.48642	1.34622	0.15381	0.40212	0.21883	0.52117	1.62057	1.52282	2.24122	2.59287	2.00942	2.29807	1.05905	1.25764	1.34757	1.83837	1.14493	1.43865	NA	-0.404945	0.60455	0.64368	1.19954	1.1021	0.81487	0.995055	0.16856	0.06771	0.513655	0.67254	1.70433	1.97125
CATD_HUMAN	FDGILGMAYPR	3.72	-0.179	-0.92	0.36125	0.85	0.36125	3.8367	3.73349	2.62484	2.88374	3.78278	3.91231	3.66273	4.00676	3.34935	3.18314	4.04839	4.18118	3.80738	4.03568	3.85464	3.8895	3.93639	4.18191	2.59327	3.13082	3.97921	4.04744	4.07971	4.35521	3.97407	3.88038	4.32891	4.66204	3.542	3.58284	4.18189	4.29551	3.25925	3.34957	3.19986	3.3319	3.29759	3.51134	3.57013	3.79322
CATD_HUMAN	LLDIACWIHHK	-0.46	-0.006	-0.02	0.98581	0	0.98581	0.4661	-0.04383	-0.54796	-1.58369	-0.22117	-0.42854	-0.17468	0.203755	-0.31081	-0.67693	-1.05039	-1.3091	-0.85468	-1.89121	0.19165	0.31392	-1.37217	-1.83302	0.726415	0.72622	-0.339435	-0.568145	-0.12679	0.27747	-0.07119	-0.55109	-1.34402	NA	-0.90758	-1.09671	0.05618	-0.505045	-0.53128	-0.897065	-0.31906	-0.68484	-1.30095	-0.59914	0.80016	0.350515
CATD_HUMAN	TMSEVGGSVEDLIAK	2.2	0.457	1.96	0.05668	3.86	0.05668	2.62492	2.90988	NA	NA	2.27261	2.30734	2.27372	2.54102	2.49743	2.22604	1.36499	1.63407	1.74487	1.45475	2.63254	2.47131	3.09125	3.28313	3.06055	3.2663	2.18829	2.19144	2.30884	2.73306	2.49515	2.55339	1.38527	1.42681	1.52473	NA	2.32502	2.18755	1.67705	1.63084	1.44227	1.02588	1.33001	1.45343	2.84889	3.04662
CATD_HUMAN	LVDQNIFSFYLSR	-0.54	-0.218	-0.59	0.56003	0.35	0.56003	-0.44141	-0.59728	-0.3616	-0.70724	-1.09205	-2.00938	-0.40859	-0.606285	0.30939	0.12486	-0.32612	-0.40711	-0.47339	-1.0441	0.33029	0.52513	-4.10855	NA	0.367845	0.0068	-0.353765	-1.41081	-0.31487	-0.4065	-0.64995	-0.76314	-1.08583	-1.1234	-0.20584	-0.57155	0.23468	-0.091375	-0.33987	-0.763895	-0.49177	-1.26964	-0.714175	-0.506	0.22728	0.529815
CATD_HUMAN	DPDAQPGGELMLGGTDSK	0.55	0.584	2.1	0.04191	4.42	0.04191	0.85239	1.25911	NA	0.27594	0.58497	0.50819	0.80993	0.996145	1.00687	0.97068	-0.18706	0.15135	-0.54557	-0.24889	1.05358	0.83074	1.65611	2.0303	1.83635	2.13216	0.058325	0.426275	0.73832	1.31092	0.50155	0.54152	NA	-0.583065	0.05678	0.21455	0.39117	0.546265	0.09466	0.389525	-0.85358	-0.40811	-0.575645	-0.4059	1.04001	1.61274
CATD_HUMAN	YSQAVPAVTEGPIPEVLK	-0.57	0.143	0.45	0.65881	0.2	0.65881	0.2736	0.43078	-1.9787	NA	-0.60537	-0.63853	-0.20526	0.406905	-1.18141	-1.74797	-1.03282	-0.86488	-1.41655	-1.34364	-0.13344	-0.07961	0.7615	1.13788	-0.603685	-0.08583	-0.872945	-0.344175	-0.9745	-0.24074	-2.26569	-1.57469	NA	NA	-0.46476	-0.36474	0.01473	-0.124985	-0.89988	-0.645655	-0.33294	0.11345	-0.651235	-0.72062	-1.08239	-0.707655
CATD_HUMAN	ISVNNVLPVFDNLMQQK	1.62	0.13	0.62	0.53846	0.38	0.53846	1.8273	1.93929	1.50803	1.7589	0.72569	1.06256	1.42457	1.62997	2.25303	2.0361	1.45715	1.53957	1.18927	0.9712	2.28825	2.20897	1.46654	1.16953	2.74777	2.55365	1.59017	1.47761	1.54322	1.85124	1.49345	1.93488	0.5993	0.635915	1.4276	1.46587	1.774	1.70181	1.74179	1.93307	1.53235	1.14494	1.07109	1.44542	2.22169	2.56506
CATD_HUMAN	AIGAVPLIQGEYMIPCEK	2.02	0.238	1.2	0.23777	1.43	0.23777	2.2877	2.40798	1.53577	1.86157	1.73265	1.74279	1.93262	2.26348	2.2222	2.36117	1.68914	1.77687	1.30085	1.23381	2.58608	2.58779	2.62349	2.39697	3.00093	3.20508	2.09953	1.88129	2.1338	2.32283	2.05067	1.78868	0.84281	0.986985	1.8864	2.16145	1.89568	1.83577	2.01765	2.11933	1.75243	1.4688	1.44237	1.76039	2.77341	2.77603
CATH_HUMAN	GIMGEDTYPYQGK	-0.51	0.189	0.36	0.72317	0.13	0.72317	NA	NA	-0.28598	0.38934	NA	NA	NA	NA	-0.27522	-0.51965	-1.72025	NA	NA	NA	0.08666	NA	NA	NA	NA	NA	NA	NA	0.12021	NA	NA	NA	-2.65135	NA	-0.02055	0.03773	-0.22761	NA	NA	NA	-0.64461	-0.86409	-0.567755	NA	NA	NA
CATH_HUMAN	MLSLAEQQLVDCAQDFNNHGCQGGLPSQAFEYILYNK	-3.06	0.845	1.24	0.24572	1.53	0.24572	NA	NA	-2.15488	-2.74038	NA	NA	NA	NA	NA	NA	NA	NA	NA	NA	NA	-2.74685	NA	NA	NA	NA	NA	NA	NA	NA	NA	NA	NA	NA	-2.914	-3.20407	NA	NA	NA	NA	-4.8968	NA	NA	-3.3831	NA	-2.43709
CATL1_HUMAN	VFQEPLFYEAPR	0.13	0.261	1.58	0.12163	2.5	0.12163	0.1154	0.44569	-0.01121	0.1277	0.31078	0.46711	0.19259	0.585325	0.41087	0.12648	-0.0889	-0.00868	0.14795	0.25874	0.06749	0.23068	0.57414	0.93849	0.128235	0.13065	-0.224655	0.167635	-0.20249	0.1369	0.04183	0.26704	-0.77854	-0.519845	-0.06579	0.01157	-0.18067	-0.234895	0.28017	0.417415	0.25993	0.41695	-0.136135	0.29159	-0.01973	-0.006455
CATS_HUMAN	GPVSVGVDAR	-4.5	NA	NA	NA	NA	NA	NA	NA	NA	NA	NA	NA	NA	NA	NA	NA	NA	NA	NA	NA	NA	NA	NA	NA	NA	NA	NA	NA	-4.98395	-4.00706	NA	NA	NA	NA	NA	NA	NA	NA	NA	NA	NA	NA	NA	NA	NA	NA
CATZ_HUMAN	VGDYGSLSGR	-2.32	-0.543	-0.85	0.40074	0.73	0.40074	NA	NA	NA	-3.37651	-2.17162	-1.8405	-2.23802	-2.83812	-2.47566	-2.93639	NA	-2.04083	-3.71416	-3.99447	-2.46785	-3.68014	-1.71474	-1.60789	-1.91298	-2.11738	-3.9017	-0.872945	-2.52759	-1.38381	-2.71407	-1.44297	-1.37935	-0.476675	NA	NA	-2.2051	-2.36728	-3.08842	-3.39136	NA	NA	NA	NA	-1.69064	-1.12254
CATZ_HUMAN	NVDGVNYASITR	-0.87	0.292	0.98	0.337	0.97	0.337	NA	0.09023	NA	-1.33377	NA	NA	NA	NA	-0.851	-0.93838	NA	NA	NA	NA	-1.11376	-1.25455	NA	NA	-0.340105	0.1522	-1.38898	NA	NA	NA	NA	-0.51248	NA	NA	-1.24181	NA	NA	-0.322285	-1.24781	-1.05303	-1.14295	-1.18421	NA	-1.454	NA	-0.550895
CBG_HUMAN	ITQDAQLK	-0.9	0.052	0.1	0.92366	0.01	0.92366	NA	NA	NA	NA	-0.80214	-0.76009	NA	-1.33553	NA	NA	NA	NA	NA	NA	NA	-1.6932	-0.57929	0.01693	NA	NA	NA	NA	-1.0046	-0.70509	NA	-1.26883	NA	NA	NA	NA	NA	NA	NA	NA	NA	NA	NA	NA	NA	NA
CBG_HUMAN	MNTVIAALSR	-0.19	0.072	0.29	0.77699	0.08	0.77699	-0.05225	0.23715	-1.50901	-1.3387	0.33997	0.4974	-0.41133	-0.043995	-0.59252	-0.92892	-0.44618	-0.6445	-0.64953	-0.38137	-0.15148	-0.08062	0.83657	1.08379	0.343325	0.8202	0.333265	0.395585	0.18704	0.63747	0.45122	0.48681	0.31107	0.217395	-0.67229	-0.72216	-0.12814	0.101515	-1.12558	-0.862855	-1.00439	-1.06853	-0.713775	-1.16496	-0.24125	0.075835
CBG_HUMAN	WSAGLTSSQVDLYIPK	-0.33	0.222	0.55	0.5862	0.3	0.5862	-1.27927	-0.2686	NA	NA	-0.00038	-0.11173	-0.40448	0.371915	NA	-0.81829	-0.33262	-0.12919	-0.51701	-0.30107	NA	0.17675	-0.30397	-0.28677	0.079385	0.77068	0.072095	0.138585	-0.12672	0.331	0.54364	0.63325	0.11205	1.02577	-1.37124	-1.36141	-0.08069	0.083215	-2.64789	-0.971315	-2.0137	-1.53234	NA	-0.86607	-0.30937	0.282405
CBG_HUMAN	SETEIHQGFQHLHQLFAK	1.13	0.586	1.45	0.16111	2.11	0.16111	0.77828	0.50714	NA	NA	0.35945	0.36586	NA	0.123015	2.25481	1.86035	NA	2.15917	NA	2.18936	2.58531	NA	NA	NA	NA	NA	NA	0.846245	NA	1.32336	NA	0.21323	0.82721	NA	1.74838	NA	NA	NA	1.62935	1.78567	-0.36059	NA	NA	NA	NA	0.359005
CBG_HUMAN	KNIFISPVSISMALAMLSLGTCGHTR	-3.08	-0.506	-0.9	0.37683	0.81	0.37683	NA	NA	-3.147	-3.34022	NA	NA	-5.52854	NA	-3.81979	NA	-2.09769	-2.50951	-3.06852	-3.93181	-2.3992	-2.37931	NA	NA	NA	-4.14453	NA	NA	-3.90305	-3.30212	NA	NA	-1.3367	-0.539005	-3.35875	NA	-2.61774	-2.21143	NA	NA	NA	NA	NA	-3.82849	-4.17421	NA
CBLN3_HUMAN	ASGSFVAPVR	0.72	0.043	0.11	0.91169	0.01	0.91169	2.17519	2.33494	-0.72089	-0.20896	1.7139	1.91199	1.07465	0.273725	0.47382	1.26986	0.36631	0.23655	1.1633	1.30641	0.1007	0.09571	0.1715	-0.21202	0.505265	0.7091	1.96971	1.6115	-0.60169	-1.50807	1.7391	2.06994	-1.53179	-0.993655	0.64044	0.75111	0.20199	0.875875	1.05787	1.42585	0.22584	0.22181	0.501815	0.64014	2.33595	2.25242
CBLN4_HUMAN	GSSSSPLGISVR	-1.31	-0.381	-0.39	0.70763	0.15	0.70763	NA	NA	0.37899	-0.3816	-3.9213	NA	NA	NA	NA	NA	NA	NA	NA	NA	NA	NA	NA	NA	NA	NA	NA	NA	NA	NA	NA	NA	-1.62639	NA	-2.07965	NA	NA	NA	NA	NA	-0.50397	-0.57331	-1.8091	NA	NA	NA
CBPB2_HUMAN	DTGTYGFLLPER	-0.75	-0.045	-0.15	0.88282	0.02	0.88282	-1.94692	NA	-1.94346	-1.53105	-0.73645	-0.7615	-0.83499	-0.142465	-0.70404	-1.08945	-0.17595	-0.17797	-0.58318	-0.38283	-0.81192	-0.86761	-0.71556	-0.5422	-0.423945	0.16322	-0.842565	-0.461025	-0.58899	0.17668	-0.71637	-0.54495	0.35982	0.850585	-1.69295	-1.122	0.11357	0.234315	-1.68153	-1.56442	-1.80193	-1.58458	-1.29341	-1.385	NA	NA
CBPE_HUMAN	SNAQGIDLNR	-1.02	0.331	0.41	0.70276	0.17	0.70276	NA	NA	NA	NA	NA	-0.441	NA	NA	NA	NA	NA	NA	NA	NA	NA	NA	NA	NA	NA	-1.37963	NA	NA	NA	NA	-1.24177	NA	NA	NA	NA	NA	NA	NA	NA	NA	NA	NA	NA	NA	NA	NA
CBPE_HUMAN	LTASAPGYLAITK	0.8	0.187	0.92	0.365	0.84	0.365	1.00464	1.2472	1.1684	1.26511	1.03799	1.23955	0.86677	1.3359	1.43411	1.21104	0.59161	0.88018	-0.10519	0.14505	0.2219	0.37323	0.99269	1.23851	0.846475	0.95327	0.986765	1.12651	0.4101	0.86437	1.31982	1.50409	-0.1477	-0.184475	1.32134	1.29378	0.3234	0.304305	0.73708	0.959495	1.12563	0.9939	0.052605	0.21765	0.25003	0.749145
CBPE_HUMAN	YIGNMHGNEAVGR	-1.43	0.328	0.5	0.6399	0.25	0.6399	NA	NA	NA	NA	NA	NA	NA	NA	-1.20176	-1.37602	NA	-1.46134	NA	NA	NA	NA	NA	NA	NA	NA	NA	NA	NA	NA	NA	NA	-1.69914	NA	NA	NA	NA	NA	NA	NA	NA	NA	NA	NA	NA	NA
CBPE_HUMAN	IHIMPSLNPDGFEK	0.4	-0.025	-0.06	0.95275	0	0.95275	0.67084	0.57108	1.05661	0.75398	0.21947	0.17493	0.48349	0.808635	0.94733	0.65429	0.79566	1.17801	-0.40989	-0.92032	-0.25273	-0.11085	NA	-0.04855	0.322225	0.45232	0.455735	0.562255	-0.26193	0.28438	0.41393	0.6217	-1.26442	1.01433	1.74472	2.05655	-0.05348	-0.650635	1.00959	0.619385	0.49916	0.54788	0.906735	-0.80594	NA	0.052055
CBPE_HUMAN	SGSAHEYSSSPDDAIFQSLAR	1.3	0.29	1.29	0.20318	1.67	0.20318	1.93348	1.99624	1.3768	1.74961	1.58029	1.69893	1.84594	2.19084	2.05025	1.81917	1.22299	1.29115	0.50909	0.6811	0.80941	0.96162	1.16705	1.46846	1.03964	1.40178	1.31628	1.5008	0.87831	1.56054	1.7085	1.688	-0.0388	0.476305	1.70066	1.63544	0.91747	0.925105	1.12546	1.50143	1.12413	1.36232	0.672215	0.64227	NA	NA
CBPE_HUMAN	ELLVIELSDNPGVHEPGEPEFK	1.24	-0.252	-0.71	0.48242	0.51	0.48242	NA	NA	0.79988	1.03696	0.77325	NA	1.71767	2.04881	1.11549	0.82078	1.7056	1.98728	2.13212	1.90878	0.96779	1.26201	NA	NA	-0.792995	-0.35958	0.512045	0.127075	NA	NA	NA	NA	0.76158	1.26734	0.9871	0.86246	1.74511	1.79895	NA	NA	1.86019	1.97288	2.16474	2.43152	NA	NA
CC126_HUMAN	TIAVLLDDILQR	-3.07	NA	NA	NA	NA	NA	NA	NA	-3.06847	NA	NA	NA	NA	NA	NA	NA	NA	NA	NA	NA	NA	NA	NA	NA	NA	NA	NA	NA	NA	NA	NA	NA	NA	NA	NA	NA	NA	NA	NA	NA	NA	NA	NA	NA	NA	NA
CC129_HUMAN	SQGSDNLQEGQEK	-1.92	0.323	0.82	0.41611	0.68	0.41611	-1.8766	-1.49783	-2.03564	-1.48176	-0.43842	NA	-2.56682	-1.8968	-1.75815	-1.96678	-3.40884	-2.69077	-2.82405	-2.57584	-2.57538	-2.23962	-0.04799	0.26789	-1.76886	-1.40333	-2.30217	-1.78198	-3.01356	-2.25351	-1.47089	-0.70897	NA	NA	-2.42499	-2.34025	-3.46584	NA	-1.91673	-1.54395	-2.17133	-1.87671	-3.28383	-2.98484	-0.77424	-0.179185
CCKN_HUMAN	AHLGALLAR	-1.93	-0.269	-0.45	0.66748	0.2	0.66748	NA	NA	-1.76726	NA	NA	NA	NA	NA	-2.57836	NA	NA	NA	NA	NA	NA	NA	NA	NA	NA	NA	NA	NA	NA	NA	NA	NA	NA	NA	NA	NA	NA	NA	-2.41649	NA	-1.4206	-1.45204	NA	NA	NA	NA
CCL14_HUMAN	WVQDYIK	-2.08	-0.438	-1.07	0.30244	1.15	0.30244	-2.43224	-2.76282	NA	NA	NA	NA	NA	-1.66336	NA	NA	NA	NA	NA	NA	NA	NA	-2.86703	NA	NA	NA	NA	NA	-2.01524	-1.74631	-2.05786	-2.38568	NA	-1.60712	NA	NA	NA	NA	NA	NA	NA	NA	NA	-2.72318	-1.35268	-1.30835
CCND3_HUMAN	ACQEQIEAALRESLR	0.46	0.22	0.89	0.38089	0.79	0.38089	0.67317	1.02832	0.75455	1.10368	0.66474	0.92886	0.21155	0.676035	0.75442	0.63418	0.05438	0.23018	0.07637	0.65261	-0.08584	0.30187	0.45316	0.9566	0.249065	0.68384	0.797315	1.13403	-0.11677	0.74414	0.1885	0.49203	NA	0.042195	0.44634	0.61815	NA	-0.242415	0.30973	0.782925	0.14044	0.52525	0.224235	0.38744	-0.28732	0.461605
CD044_HUMAN	MASKLFEMTGER	-0.28	-0.038	-0.08	0.93757	0.01	0.93757	1.32293	2.38625	NA	-1.86109	0.15231	0.72225	0.35371	-0.671305	-0.72389	0.2218	-1.45915	-0.90955	-0.86438	-0.70946	NA	-1.43503	-0.11473	-0.64673	-0.737855	-1.09968	0.437115	0.068875	NA	NA	0.71834	0.99002	NA	-2.92266	NA	-1.24168	NA	-0.685185	0.13484	0.306175	-0.88428	-1.01763	-1.07174	-0.97426	1.18022	1.80849
CD048_HUMAN	TETLLLQAER	0.9	0.144	0.59	0.55607	0.35	0.55607	0.84316	1.29392	1.50055	1.86802	0.81055	0.96051	0.54575	0.710465	1.33752	1.25014	0.55401	0.66682	0.60798	0.99216	1.00483	0.91064	1.04179	1.33288	0.435185	0.84796	1.34786	1.50558	0.24632	0.83665	0.29305	0.66114	-0.60812	-0.454135	1.59565	1.58506	-0.0805	0.269435	1.42244	1.56568	1.23617	1.3896	1.54265	1.50177	0.0852	0.686175
CD14_HUMAN	ATVNPSAPR	-1.82	-0.174	-0.53	0.60182	0.28	0.60182	-4.01913	NA	-0.95096	-0.89946	-1.31686	-1.53769	-1.12634	-1.07578	-1.30334	-1.83958	-1.77658	-1.11941	-2.08563	-1.67238	-2.80102	NA	-2.91573	-2.30679	-2.17759	-2.12134	-2.41215	-1.79435	-0.8958	-0.74454	-2.68274	-2.38309	-1.78538	NA	-1.13431	-1.19328	-1.26477	-1.13011	-1.85945	-1.83944	-1.04144	-1.08456	-1.75825	NA	-3.59111	-3.73594
CD14_HUMAN	ELTLEDLK	-0.38	-0.289	-1.09	0.2825	1.19	0.2825	-1.10991	-0.8684	0.52538	0.67424	-0.58868	-0.33911	-0.35797	0.104235	0.39252	0.17703	0.00625	0.11512	-0.42662	-0.47116	-1.0508	-0.9931	-2.61852	-2.02817	-1.03034	-0.65972	-0.156385	0.002595	0.18683	0.63749	-0.50844	-0.44117	-0.36173	-0.654845	0.39826	0.35427	0.0831	0.313965	-0.6487	-0.446865	0.32132	0.29471	-0.584955	-0.53997	-1.66961	-1.34414
CD14_HUMAN	VLDLSCNR	1.08	-0.258	-1.02	0.3114	1.05	0.3114	-0.23629	0.32217	1.80185	2.04053	1.14952	1.2356	1.50466	0.867825	1.23766	1.40264	1.17881	1.17684	1.10802	1.23453	0.48189	0.39482	0.06768	0.18015	0.769845	1.05802	1.24541	1.13662	1.62979	0.97557	0.94311	1.28751	0.45889	1.02486	1.74358	1.80443	1.14554	1.86567	1.02391	1.18481	1.94237	1.95164	1.21243	0.79983	0.51689	0.250775
CD14_HUMAN	GLMAALCPHK	-1.81	-0.001	0	0.99801	0	0.99801	-3.48068	-3.35286	-0.43188	-0.69066	NA	NA	NA	NA	NA	NA	-1.36436	-1.42607	NA	-2.37269	NA	NA	NA	NA	NA	NA	NA	NA	NA	NA	NA	NA	-1.17632	-1.7771	-0.87816	-1.14632	NA	-1.49029	NA	NA	NA	NA	NA	-2.76628	NA	-3.01128
CD14_HUMAN	FPAIQNLALR	0.48	-0.179	-0.78	0.43936	0.61	0.43936	NA	0.07131	0.85848	0.89106	NA	NA	0.66486	1.01197	0.72754	0.44208	0.75978	0.74908	0.43612	0.67317	-0.32249	-0.35854	NA	NA	-0.388075	-0.33467	0.458845	0.727295	0.60584	1.06617	0.34699	0.59454	0.34609	0.726025	0.95126	0.96899	1.3022	1.1638	0.17934	0.479385	1.07764	1.07067	-0.379875	0.08499	-0.42484	-0.259795
CD14_HUMAN	LKELTLEDLK	-0.84	-0.494	-1.35	0.19294	1.82	0.19294	-2.00319	NA	-0.0411	-0.0477	NA	NA	NA	NA	NA	NA	-1.02885	NA	-1.27977	-0.88239	NA	NA	NA	NA	-2.21134	NA	-0.920435	-0.783415	-1.32338	-1.09403	NA	-1.48916	NA	NA	-0.37258	-0.02474	-0.35912	-0.725385	NA	NA	-0.3613	-0.22849	NA	NA	NA	NA
CD14_HUMAN	LTVGAAQVPAQLLVGALR	1.62	-0.706	-2.18	0.03496	4.75	0.03496	0.7686	0.83098	2.84847	2.90701	0.9069	1.09012	1.53872	1.82983	2.13873	2.00577	2.24536	2.42294	1.93092	1.79185	1.06154	0.89863	-1.76115	-1.76498	0.610285	1.01168	1.82804	1.84037	1.97429	2.3251	1.61307	1.56594	1.9724	2.29298	2.69213	2.5184	2.35956	2.37889	1.8185	1.79434	2.80993	2.63649	1.43436	1.9125	0.60362	1.06451
CD14_HUMAN	SWLAELQQWLKPGLK	0.85	-0.526	-1.31	0.19786	1.72	0.19786	-0.59753	-0.96639	2.8504	2.78856	-1.0637	-1.50407	0.43449	0.718705	1.51482	0.85062	1.89378	2.15473	1.14784	1.09288	0.40757	0.6987	NA	NA	-1.21981	-0.87972	0.437425	0.362365	1.1326	0.86591	0.11523	0.0114	1.98007	2.28301	2.23295	2.15014	1.83284	1.66898	0.40065	0.386155	2.20431	2.10378	0.950455	1.6453	-0.44214	-0.338295
CD14_HUMAN	RLTVGAAQVPAQLLVGALR	1.44	-0.668	-2.16	0.03717	4.64	0.03717	0.43916	0.67836	2.42868	2.62064	0.86084	0.96369	1.43199	1.64472	1.7406	1.6304	2.06888	2.07098	1.58384	1.42226	0.39245	0.69769	NA	-1.74927	0.433245	0.587	1.64186	1.39941	1.67516	2.03836	1.42823	1.25111	1.88117	2.01756	2.40332	2.45717	2.00786	2.07359	1.4009	1.49787	2.64594	2.29043	1.0937	1.65436	0.38985	0.798135
CD14_HUMAN	AFPALTSLDLSDNPGLGER	3.2	-0.315	-1.25	0.21687	1.57	0.21687	2.20069	2.88533	3.6729	4.09514	3.00646	3.20801	3.44225	3.69731	3.53928	3.50285	3.45624	3.69389	3.16529	3.33152	2.21171	2.56479	1.81638	1.8066	2.65105	2.91054	3.37566	3.22025	3.38775	3.59474	3.09715	3.22779	2.85611	3.57866	3.86769	4.01871	3.289	3.71486	3.3479	3.49571	4.12848	4.03782	2.70524	3.11177	2.28524	2.82447
CD14_HUMAN	VLSIAQAHSPAFSCEQVR	2.48	-0.352	-1.55	0.12926	2.4	0.12926	1.83709	1.96365	3.32856	3.56006	1.92465	1.90936	2.82134	3.03159	2.79577	2.70102	2.68838	3.06499	2.27035	2.48273	1.60315	1.64487	1.0863	1.19925	1.80492	2.33948	2.49439	2.67305	2.64347	3.04794	2.21919	2.19852	2.73609	2.87569	3.16985	3.13349	2.8136	2.96788	2.27293	2.50452	3.46917	3.42876	NA	2.4344	1.65335	1.88295
CD14_HUMAN	ITGTMPPLPLEATGLALSSLR	1.72	-0.88	-2.05	0.04724	4.18	0.04724	0.65114	0.73295	3.30263	3.58864	0.33125	0.3299	1.69006	1.91951	2.35598	2.14194	2.6253	2.76692	1.98766	1.94812	1.04276	1.22933	-1.79708	-3.32301	1.00387	1.02936	1.81465	1.76682	2.41754	2.22978	1.25586	1.53713	2.44469	2.64276	2.80707	3.10294	2.49323	2.45426	2.20054	2.08767	2.91434	2.98894	1.5516	2.2565	0.92127	1.27128
CD14_HUMAN	GLMAALCPHKFPAIQNLALR	-0.41	0.303	0.6	0.55507	0.36	0.55507	NA	NA	0.16386	0.21044	NA	NA	-0.25334	-0.170655	NA	NA	-0.55774	-1.02242	NA	NA	NA	NA	NA	NA	NA	NA	-0.863605	-1.01397	-0.33154	-0.26409	-1.61746	-0.726	-0.55754	-0.288375	0.58905	0.47094	-0.0302	-0.685035	-0.6317	NA	0.75635	0.41893	NA	NA	NA	-2.65291
CD14_HUMAN	NTGMETPTGVCAALAAAGVQPHSLDLSHNSLR	0.96	-0.091	-0.3	0.76952	0.09	0.76952	NA	NA	1.459	1.63039	NA	NA	1.16931	NA	NA	NA	0.5385	0.95962	0.36739	NA	NA	NA	NA	NA	0.242675	NA	0.801305	NA	0.9773	NA	NA	NA	0.66022	1.03984	1.2351	1.36327	1.26005	0.886255	0.43771	0.789745	1.79471	1.54463	-0.025015	NA	NA	NA
CD166_HUMAN	ALFLETEQLK	0	-0.045	-0.23	0.81711	0.05	0.81711	0.22279	0.21655	0.15706	0.27131	0.03635	0.118	-0.4149	-0.265975	0.05106	-0.15969	-0.25617	-0.40241	-0.63449	-0.20281	-0.16209	0.02064	0.16793	0.44897	-0.331855	0.15502	0.239315	0.277165	-0.23409	0.07514	-0.04818	0.03853	-1.32554	NA	0.05271	0.12301	NA	NA	0.03115	0.410055	0.3178	0.2968	0.221065	0.39555	-0.11778	0.282765
CD166_HUMAN	SSNTYTLTDVR	-1.06	-0.009	-0.04	0.97168	0	0.97168	NA	-0.82642	NA	NA	-0.64768	-0.57414	NA	-1.36068	NA	-0.99048	-1.88727	-1.35914	NA	-1.18199	-1.00582	-1.16222	NA	NA	-1.17708	-0.72575	-0.950835	-0.948055	-1.01081	NA	NA	NA	NA	NA	NA	-1.00061	NA	-1.86062	-0.8676	-0.760665	NA	NA	NA	-0.81639	NA	NA
CD166_HUMAN	LDVPQNLMFGK	0.89	NA	NA	NA	NA	NA	NA	0.89222	NA	NA	NA	NA	NA	NA	NA	NA	NA	NA	NA	NA	NA	NA	NA	NA	NA	NA	NA	NA	NA	NA	NA	NA	NA	NA	NA	NA	NA	NA	NA	NA	NA	NA	NA	NA	NA	NA
CD166_HUMAN	VLHPLEGAVVIIFK	-1.77	0.006	0.02	0.98626	0	0.98626	NA	NA	-1.32847	-1.34951	NA	NA	NA	NA	-2.36847	-1.98224	-1.8667	NA	-2.15866	-2.00961	NA	-1.26249	NA	NA	NA	NA	NA	NA	NA	NA	NA	NA	NA	NA	-1.40589	-1.53329	NA	NA	-1.91446	-2.60616	-1.6988	-2.21978	-1.13445	-1.50801	-1.68176	-1.87762
CD166_HUMAN	YEKPDGSPVFIAFR	0.2	0.087	0.48	0.63241	0.23	0.63241	0.49296	0.43408	0.69533	0.76095	0.03721	0.04759	-0.11703	0.220515	0.40386	0.26035	-0.06759	-0.13327	-0.12019	0.05834	0.28427	0.39439	0.31187	0.48069	0.293635	0.13594	0.448815	0.634075	-0.12618	0.20372	0.09938	0.15744	-1.19498	-1.07586	0.59667	0.34888	-0.72593	-0.705805	0.57764	0.600995	0.60784	0.65389	0.761785	0.70885	0.21397	0.353705
CD166_HUMAN	QIGDALPVSCTISASR	-1.85	0.089	0.29	0.77223	0.09	0.77223	NA	-1.35434	-1.71724	-1.74113	-2.32822	-1.92735	NA	NA	NA	NA	NA	NA	NA	NA	NA	-2.29394	-1.73538	-1.12448	NA	-2.25795	NA	NA	NA	NA	NA	-2.11054	NA	NA	-2.51483	NA	NA	NA	NA	-2.23829	-1.0993	-1.0937	-2.08291	-1.96173	NA	-1.78923
CD166_HUMAN	EMDPVTQLYTMTSTLEYK	-0.5	-0.309	-1.13	0.26536	1.27	0.26536	-0.58148	-0.29351	0.43062	0.89975	-1.54726	-1.7961	-1.17133	-1.07625	-0.45224	-0.90142	-0.306	-0.27333	-0.71879	-0.94351	-0.30429	-0.10553	-1.40594	-1.82398	-0.276685	-0.42354	-0.250895	-0.007225	-0.44157	-0.77477	-0.97583	-0.65365	-1.10312	-1.03713	0.03389	0.11056	-1.69446	-1.51005	0.69076	0.460805	0.45963	0.21358	-0.263815	0.3102	-0.59178	0.138395
CD44_HUMAN	TEAADLCK	-1.98	0.511	1.12	0.27958	1.25	0.27958	NA	NA	NA	NA	NA	-1.12913	NA	-1.80401	NA	NA	NA	NA	NA	-2.34826	NA	NA	NA	-1.4221	-1.98582	-1.65958	-3.26907	-2.53166	-1.00769	-0.73664	-2.97104	-2.37981	NA	-2.96911	-1.75981	-1.72337	NA	NA	NA	NA	NA	NA	NA	NA	NA	NA
CD44_HUMAN	ALSIGFETCR	1	0.044	0.29	0.77379	0.08	0.77379	1.31252	1.31835	1.1228	1.16821	1.14342	1.2584	1.14699	1.15804	1.21614	0.97074	0.66796	0.78521	0.76703	1.03297	0.97067	1.04061	0.32367	0.47408	1.37763	1.24967	1.07048	1.09143	1.27878	1.6159	1.02616	1.24729	0.11904	0.105955	1.31034	1.36664	0.55076	0.476695	1.12246	1.30021	0.77617	0.96419	1.02399	0.80481	1.18583	1.18247
CD44_HUMAN	YGFIEGHVVIPR	3.26	-0.02	-0.14	0.89249	0.02	0.89249	3.71663	3.52539	3.51018	3.34239	3.46528	3.34058	3.39521	3.55051	3.14707	2.99927	3.02841	3.39232	3.10294	3.0301	3.29127	3.31815	2.40602	2.50154	3.40966	3.47357	3.29656	3.30864	3.52957	3.91468	3.44398	3.49827	2.94911	2.65922	3.62908	3.50212	2.83176	2.81557	3.32517	3.31193	3.14151	3.10827	3.0149	3.11416	3.41636	3.54409
CD59_HUMAN	ENELTYYCCK	0.27	0.34	1.6	0.11743	2.57	0.11743	0.07458	0.43066	NA	NA	0.60353	0.61687	0.37295	0.196695	0.81096	0.67951	-0.35504	0.10507	0.23399	0.43353	0.57928	0.57617	0.4729	0.40859	0.624855	1.02721	0.130105	0.072015	0.52515	0.33056	-0.04264	0.26996	-1.24809	-1.26343	0.52211	0.67563	-0.66505	-0.254105	0.76317	1.00587	NA	-0.01927	NA	0.34932	0.177	0.334475
CD59_HUMAN	FEHCNFNDVTTR	2.51	0.192	1.17	0.24845	1.37	0.24845	2.47888	2.75724	2.67566	3.03807	2.73415	2.74241	2.69604	2.18336	2.72249	2.71211	2.26098	2.33605	2.54166	2.61955	2.48806	2.50182	2.5232	2.66703	2.574	2.95477	2.44873	2.46303	2.52613	2.21801	2.36998	2.60526	1.74739	1.58323	2.6565	2.78669	1.76869	2.09265	2.86399	2.97415	2.62287	2.65881	2.71995	2.66922	2.17601	2.40943
CD59_HUMAN	LRENELTYYCCK	2.83	0.241	1.5	0.14203	2.24	0.14203	2.80541	2.81059	3.18216	3.29297	2.90865	2.94089	3.17697	2.89642	3.16915	3.17619	2.695	2.64002	2.87985	2.91424	2.96293	2.91348	2.73855	2.59109	3.00696	3.28577	2.72734	2.34496	2.85444	2.43824	2.6972	2.73902	2.10954	1.99792	3.10146	3.1087	1.94056	2.37764	3.2836	3.4159	2.97415	2.94864	3.12742	2.93723	2.59454	2.45409
CDK10_HUMAN	NFIIHRDLK	-1.51	-0.571	-1.94	0.06047	3.75	0.06047	-2.28169	-2.29168	NA	NA	-1.58414	-2.04512	-1.71505	-1.65241	NA	-2.66405	-1.15668	-1.14422	-0.78557	-1.31105	-1.93491	-1.83834	NA	NA	-2.3928	-2.36366	-0.951565	-1.26892	-1.10884	-0.74852	-1.14753	-1.48029	0.13587	0.243745	-1.88834	-2.14015	-0.77008	-0.907385	-2.5746	-2.69291	-0.96701	-1.53953	-1.59763	-0.87815	-1.93964	-1.45884
CE350_HUMAN	QAVFDLTK	1.99	NA	NA	NA	NA	NA	NA	NA	NA	NA	NA	NA	NA	NA	NA	NA	NA	NA	NA	NA	NA	NA	NA	NA	NA	NA	NA	NA	2.14297	1.84308	NA	NA	NA	NA	NA	NA	NA	NA	NA	NA	NA	NA	NA	NA	NA	NA
CECR1_HUMAN	SQVFNILR	-1.24	NA	NA	NA	NA	NA	NA	NA	NA	NA	NA	NA	NA	NA	NA	NA	NA	NA	NA	NA	NA	NA	NA	NA	NA	NA	NA	NA	NA	NA	NA	NA	NA	NA	NA	NA	-1.15124	-1.32248	NA	NA	NA	NA	NA	NA	NA	NA
CECR1_HUMAN	LPYFFHAGETDWQGTSIDR	-0.31	NA	NA	NA	NA	NA	NA	NA	NA	NA	NA	NA	NA	NA	NA	NA	NA	NA	NA	NA	NA	NA	NA	NA	NA	NA	NA	NA	NA	NA	NA	NA	NA	NA	NA	NA	NA	-0.307245	NA	NA	NA	NA	NA	NA	NA	NA
CEP55_HUMAN	NQITQLESLK	-2.03	0.126	0.42	0.67752	0.18	0.67752	NA	-1.40312	-3.29525	-3.28174	NA	-1.4561	-1.97565	-1.35007	-2.03558	-2.44512	-2.06555	-1.992	-1.72227	-1.44834	NA	-1.71025	-1.41956	-0.82848	-3.10854	NA	NA	NA	NA	NA	-1.27107	-1.17479	-2.65729	-2.05315	-2.70808	-2.6679	-2.07856	-2.39568	-2.3317	-1.9687	-1.87588	-1.83109	-2.00698	-2.21542	NA	NA
CERU_HUMAN	GEFYIGSK	2.35	-0.103	-0.54	0.59083	0.3	0.59083	1.82237	NA	NA	1.40481	2.71312	NA	NA	2.02841	NA	2.02728	2.11566	2.22937	NA	2.32311	NA	2.1947	2.70024	NA	2.82903	3.02124	2.78482	2.59497	2.58763	NA	2.76299	2.80729	2.78495	2.81123	2.20839	2.24684	2.39119	2.7237	NA	1.74179	1.8939	1.86205	NA	2.02811	NA	2.02425
CERU_HUMAN	YTVNQCR	-0.1	0.028	0.12	0.90884	0.01	0.90884	-0.31032	-0.22132	NA	NA	0.33717	0.19635	-0.29821	-0.341585	-0.45564	-0.80623	-0.47451	0.13053	-0.27753	-0.04915	NA	NA	0.09407	0.5326	-0.010675	0.19598	NA	0.225865	0.41372	0.62403	NA	-0.18072	0.97446	0.977075	-0.60184	NA	0.30618	0.447655	-1.37759	-1.17755	NA	-0.62859	-0.392645	NA	-0.58458	-0.367605
CERU_HUMAN	QYTDSTFR	1.72	-0.06	-0.25	0.80402	0.06	0.80402	1.05847	1.39537	0.29197	0.57464	2.45696	2.42341	1.69323	1.75862	1.51118	1.30136	1.36043	1.84665	1.82738	1.93019	1.66138	1.53116	2.29744	2.59538	2.01836	2.35374	1.90701	2.20885	2.41485	2.53873	1.99963	2.02298	2.59527	2.9626	1.464	1.43554	2.22961	2.4484	0.75923	0.897505	1.00592	1.22565	1.5475	1.20963	1.03841	1.1689
CERU_HUMAN	MYYSAVDPTK	3.28	-0.156	-0.94	0.3512	0.89	0.3512	2.99847	3.04729	2.49234	2.5211	3.66991	3.57387	3.16742	2.84065	2.98694	2.9027	2.95194	3.17172	3.30784	3.30793	3.13705	3.12863	3.7121	3.53553	3.72451	3.92051	3.7557	3.5265	3.74358	3.31366	3.84384	3.88257	3.84797	3.82371	3.26873	3.31168	3.44903	3.69084	2.65724	2.79798	2.98238	2.93175	3.03537	2.90634	3.24903	3.20033
CERU_HUMAN	IYHSHIDAPK	1.14	-0.241	-1.07	0.29163	1.14	0.29163	0.88349	1.35307	0.39165	0.42167	1.0094	0.89952	1.35618	1.35586	0.79569	0.49518	0.91055	1.4024	1.05985	1.32374	0.49805	1.01887	1.29891	0.93745	1.48533	1.48478	1.41054	1.64115	1.13351	1.43343	1.52499	1.95791	2.4024	2.14054	0.94355	0.89839	1.47795	1.50474	0.30849	0.293575	1.13366	1.13625	0.773305	0.9708	0.65651	1.46298
CERU_HUMAN	DIFTGLIGPMK	3.54	-0.207	-1.1	0.27938	1.2	0.27938	3.63499	3.56282	2.7552	2.92645	3.79203	3.70328	2.93017	3.21284	3.16745	3.07091	3.56686	3.69006	3.62289	3.602	3.38396	3.38267	3.57841	3.35998	3.94986	3.88397	4.04931	3.90618	3.74209	3.99321	4.28239	4.06334	4.3999	4.53904	3.71553	3.61225	3.90731	3.91424	2.31131	2.29664	3.61447	3.26111	3.02839	3.4134	3.3495	3.51387
CERU_HUMAN	EYTDASFTNR	2.07	-0.122	-0.72	0.47771	0.51	0.47771	1.8377	2.01021	1.02288	1.18422	2.46964	2.4855	1.94997	1.95288	1.88827	1.72841	1.74327	1.94049	1.96539	2.04941	1.81406	1.78201	2.4195	2.65546	2.55538	2.76949	2.39348	2.54061	2.51199	2.34307	2.22283	2.33705	2.58522	2.86551	1.87108	1.8482	2.35174	2.49363	1.52228	1.65505	1.59572	1.66937	1.66162	1.70469	NA	2.25563
CERU_HUMAN	DDEEFIESNK	2.69	0.005	0.02	0.98241	0	0.98241	2.20301	2.77604	1.37511	1.88161	3.26002	3.28471	2.61872	2.42821	2.61846	2.51523	2.24758	2.61241	2.67667	2.80471	2.55492	2.35377	3.31145	3.65571	3.11137	3.48717	3.05009	3.19218	2.90163	2.91733	2.8327	3.1302	3.10079	3.33548	2.35224	2.5547	2.8834	3.23414	1.86492	2.19118	2.13519	2.36976	2.16185	2.32439	2.43822	2.70873
CERU_HUMAN	EYTDASFTNRK	-0.64	-0.008	-0.03	0.97475	0	0.97475	NA	NA	NA	NA	-0.33772	-0.52755	-0.80606	-0.686885	-1.21994	-1.31512	NA	-0.54935	-0.64071	-0.68903	-1.13613	-1.03567	-0.23668	-0.30173	-0.740305	-0.65937	-1.0373	-0.888935	-0.52664	-0.28126	-0.54965	-0.45029	0.64361	0.712335	-1.20605	NA	-0.00052	-0.174295	-2.03463	NA	NA	NA	NA	-1.36459	NA	NA
CERU_HUMAN	GAYPLSIEPIGVR	4.05	-0.133	-0.67	0.50799	0.45	0.50799	4.03788	4.43013	2.90649	2.89781	4.51591	4.57027	3.89078	4.11881	3.79158	3.50354	3.8653	3.88673	3.9599	4.19419	3.76985	3.75051	4.49276	4.84692	4.14492	4.16335	4.40913	4.52893	4.38194	4.68075	4.54505	4.71213	4.73388	4.97189	3.74011	3.85376	4.43124	4.27593	3.28254	3.48506	3.66826	3.73057	3.33397	3.64655	3.9502	4.03329
CERU_HUMAN	QSEDSTFYLGER	2.01	-0.004	-0.02	0.98774	0	0.98774	2.02913	2.25559	0.48857	1.09339	2.52803	2.6165	1.99171	2.2545	1.81074	1.57963	1.70555	1.99217	1.91128	2.1499	1.71809	1.71827	2.50269	2.85663	2.21849	2.71857	2.17842	2.51026	2.52413	2.85398	2.30616	2.43264	2.97208	3.26991	1.64106	1.64627	2.4086	2.65896	0.96803	1.14929	1.20501	1.39388	1.3803	1.14431	1.54598	2.02813
CERU_HUMAN	DIASGLIGPLIICK	4.29	-0.487	-3.15	0.00306	9.9	0.00306	3.71855	3.94879	3.21519	3.42627	4.0989	4.17337	3.87267	4.01922	4.02699	3.99955	4.31178	4.45318	4.31613	4.34332	4.03069	4.01072	3.97109	3.96249	4.40069	4.53891	5.05213	4.94454	4.14704	4.34165	4.80542	5.0787	4.93458	5.14255	4.37799	4.35822	4.5607	4.52893	4.05781	4.09849	4.70139	4.44411	4.12939	4.34915	4.08595	4.43168
CERU_HUMAN	EVGPTNADPVCLAK	3.35	-0.27	-1.39	0.17214	1.93	0.17214	2.94343	3.10081	2.02524	2.25328	3.48004	3.57917	3.25717	3.44808	3.00686	2.85431	3.08468	3.44557	3.18448	3.44646	3.02688	2.95428	3.66837	4.07241	3.49824	3.91144	3.67164	3.96082	3.42661	3.75869	3.60292	3.95383	3.94927	4.1116	3.12596	3.01686	3.51504	3.71245	3.0139	3.1694	3.58462	3.5278	3.06231	2.94815	3.10967	3.41366
CERU_HUMAN	ALYLQYTDETFR	4.03	-0.223	-1.17	0.24908	1.37	0.24908	4.0959	4.28024	2.8165	2.6914	4.29142	4.16055	3.99372	4.13666	3.86777	3.6914	4.01756	4.08512	4.23905	4.18376	3.96889	3.75241	3.65884	3.80442	4.26478	4.32848	4.42927	4.42303	4.28859	4.58478	4.59083	4.62563	4.93777	4.96274	3.90348	3.50979	4.76716	4.74993	3.36339	3.2987	3.54384	3.51433	3.48971	3.45999	4.11415	4.22598
CERU_HUMAN	VNKDDEEFIESNK	0.68	-0.128	-0.43	0.66931	0.19	0.66931	0.4526	0.92775	-1.13725	-1.08225	1.33361	1.41468	1.19037	1.06917	-0.24872	-0.20919	0.43614	0.57427	0.58324	0.94074	0.27282	0.23208	1.5854	1.78187	0.626105	0.90409	0.686655	0.881215	1.5883	1.70969	1.16426	1.35742	2.07291	2.36613	0.08225	0.01491	1.25197	1.65932	NA	-0.317485	0.39576	0.45055	NA	-0.19706	-0.55322	-0.231865
CERU_HUMAN	DLYSGLIGPLIVCR	3.52	-0.598	-3.35	0.00173	11.23	0.00173	2.94445	3.10379	2.82768	3.05557	2.9407	3.1136	2.88027	3.07879	3.30729	3.18374	3.6712	3.91479	3.71959	3.6524	3.35959	3.34535	2.39111	2.30964	3.79455	3.7684	4.19057	4.06395	3.08535	3.46078	3.94425	4.25242	4.38653	4.48782	3.74451	3.63955	3.87467	3.81608	3.47115	3.55721	4.11579	3.87118	3.46807	3.85797	3.33329	3.70647
CERU_HUMAN	RQSEDSTFYLGER	1.82	-0.126	-0.53	0.60089	0.28	0.60089	NA	NA	NA	NA	NA	NA	NA	NA	1.79123	1.58661	NA	2.05731	1.73146	1.92742	1.73573	NA	2.41352	2.02676	0.792845	1.0829	1.85023	2.16057	1.2023	1.4441	2.08589	1.9265	1.87108	2.19478	1.51334	1.6832	1.87321	2.10661	NA	NA	2.25057	2.28997	2.31569	1.78198	NA	1.48761
CERU_HUMAN	VDKDNEDFQESNR	0.58	-0.421	-1.17	0.26207	1.37	0.26207	NA	-0.43093	NA	NA	NA	0.86306	NA	0.449095	NA	NA	NA	NA	NA	0.21627	NA	-0.08389	NA	NA	0.776755	1.07147	NA	0.375535	0.86229	1.12797	NA	NA	NA	NA	NA	NA	0.83101	0.880795	NA	NA	NA	NA	NA	NA	NA	NA
CERU_HUMAN	QYTDSTFRVPVER	-0.19	-0.471	-1.37	0.19337	1.88	0.19337	-0.64355	-0.3252	NA	NA	-0.11883	0.01838	-0.30536	-0.274025	NA	NA	NA	NA	NA	-0.96221	NA	NA	NA	NA	NA	NA	NA	NA	NA	-0.18041	NA	NA	0.28936	0.600205	NA	NA	-0.22288	-0.130915	NA	NA	NA	NA	NA	NA	NA	NA
CERU_HUMAN	AGLQAFFQVQECNK	-1.26	-0.406	-1.05	0.30295	1.1	0.30295	-1.27622	-1.12449	NA	NA	-1.10789	-1.6969	-1.44299	-1.9042	NA	NA	NA	-1.31099	-0.81305	-1.43401	NA	-2.25573	-2.3588	-2.3434	-0.444675	-1.43607	-1.10157	-1.12017	-0.3099	-0.66549	-0.72621	-0.82337	0.49057	0.065295	-1.62009	NA	-0.63735	-1.12377	NA	NA	NA	-2.28338	NA	NA	-1.76814	-2.69239
CERU_HUMAN	KALYLQYTDETFR	-0.05	-0.225	-0.89	0.37817	0.8	0.37817	-0.58869	-0.55411	NA	NA	0.09538	0.14533	-0.18861	0.030245	-0.59981	NA	-0.10526	0.30867	-0.23875	0.08907	-0.61653	-0.29379	-0.37124	-0.40258	NA	NA	0.100135	0.083325	0.31276	0.71639	0.36448	0.41521	1.37606	1.03066	-0.2076	NA	0.42173	0.639475	-1.07358	NA	0.00725	-0.08785	-0.648085	-0.32555	-1.28325	NA
CERU_HUMAN	NNEGTYYSPNYNPQSR	1.82	0.023	0.11	0.91438	0.01	0.91438	1.72833	1.79977	0.58528	0.90472	2.35711	2.23975	2.09164	1.88658	1.69376	1.49793	1.43733	1.81757	1.77989	2.0858	1.67319	1.54447	2.28349	2.3997	2.25497	2.58808	1.9382	2.09212	2.29257	2.24847	2.24082	2.302	2.69697	2.60392	1.28877	1.52309	2.36778	2.60107	0.81698	1.08378	1.04308	1.38545	1.16667	1.26481	1.42149	1.80427
CERU_HUMAN	TTIEKPVWLGFLGPIIK	4.51	-0.586	-2.42	0.01976	5.88	0.01976	4.50214	4.43607	4.11278	4.37891	4.1625	4.3027	4.03807	4.36268	4.50069	4.32328	4.76512	4.97729	4.82744	4.72694	4.31895	4.41962	2.37366	1.83926	4.48654	4.49867	4.84385	4.73318	4.7237	4.94766	4.8182	4.92658	5.97646	6.10461	4.77543	4.6505	5.27207	5.1292	4.07776	4.13387	4.76487	4.53775	4.32554	4.68876	4.11642	4.52334
CERU_HUMAN	AEEEHLGILGPQLHADVGDK	2.34	-0.191	-1.01	0.31781	1.02	0.31781	2.0866	2.35345	1.31318	1.60747	2.32071	2.59425	2.39387	2.68683	2.23472	1.93357	2.24745	2.15202	2.04979	2.28744	1.90815	1.88299	2.43247	2.69561	2.8104	2.98806	2.84829	3.00147	2.51707	2.693	2.76169	2.82643	3.39325	3.32326	2.14599	2.27636	2.53615	2.6551	1.46405	1.65342	2.27692	2.2737	1.95093	1.91694	1.97943	2.30789
CERU_HUMAN	NLASRPYTFHSHGITYYK	2.2	-0.23	-0.73	0.46926	0.53	0.46926	2.73819	2.39335	0.46274	0.65393	2.54319	2.27687	2.60984	2.74291	1.56211	1.46909	1.73977	2.2743	2.20887	2.05858	1.8043	2.06537	2.54271	2.20643	2.70083	2.65128	2.77228	2.65245	2.78818	2.91441	2.90832	2.86702	3.74463	3.97904	1.83214	1.70272	2.932	2.82131	0.90601	1.22218	1.75677	1.89615	0.457185	1.95226	2.06072	2.13327
CERU_HUMAN	LISVDTEHSNIYLQNGPDR	3.62	-0.137	-0.7	0.48569	0.49	0.48569	3.58226	3.82652	2.66212	3.10472	3.76441	3.89557	3.6467	3.8858	3.37424	3.23039	3.50871	3.52792	3.5469	3.75678	3.23032	3.34227	3.57167	3.83379	3.72499	4.11256	3.89119	3.96068	3.73737	4.11445	3.89382	4.14829	4.53933	4.59035	3.44511	3.40415	3.96257	4.07212	2.75794	3.21371	3.44247	3.39181	3.14143	3.05026	3.30822	3.79434
CERU_HUMAN	MHSMNGFMYGNQPGLTMCK	2.95	-0.314	-1.43	0.15987	2.05	0.15987	3.09178	2.57663	2.82295	2.92626	2.33742	1.96259	2.71526	2.86078	2.54595	2.24275	3.00585	3.15667	2.92676	2.64184	2.7627	2.81117	2.70552	2.10001	3.71324	3.99984	3.52068	3.23994	3.6055	3.59247	3.23224	2.96473	4.38917	4.42232	3.11565	3.07757	3.18742	3.12681	2.30737	2.4034	2.63951	2.65555	2.35045	2.46854	2.97757	2.90196
CERU_HUMAN	KAEEEHLGILGPQLHADVGDK	4.19	-0.183	-1.01	0.31625	1.03	0.31625	4.27785	4.31845	2.87758	3.26874	4.35382	4.41719	4.36006	4.51379	3.9535	3.78452	4.09706	4.07622	4.11718	4.07418	3.76807	3.8122	4.3975	4.39122	4.36484	4.66247	4.55178	4.57345	4.44536	4.66437	4.52222	4.61645	5.28899	5.34119	3.93714	3.9712	4.55343	4.52996	3.3675	3.44741	3.97516	3.93497	3.6989	3.82123	4.09405	4.21812
CERU_HUMAN	KLISVDTEHSNIYLQNGPDR	0.6	-0.063	-0.24	0.81131	0.06	0.81131	0.53618	0.74546	NA	NA	0.9148	1.06147	0.81646	1.16519	-0.44573	-0.01651	0.41179	0.76895	0.01388	0.37003	0.01376	0.0369	1.00304	0.92108	0.214415	0.97933	0.725135	0.865805	1.12269	1.36615	1.04996	1.0558	1.50186	1.92921	0.00435	-0.14311	0.60593	0.884115	NA	-0.245225	NA	NA	NA	-0.18989	0.10213	0.166855
CERU_HUMAN	MYYSAVDPTKDIFTGLIGPMK	-0.55	-0.384	-0.84	0.40362	0.71	0.40362	-0.55358	-0.30534	-0.70562	-0.407	-0.3146	-0.51266	-0.51334	-0.163295	-1.13077	-1.265	-0.6787	-0.55999	-0.00193	-0.14238	-1.15992	-0.84945	-1.70752	-3.53627	-0.826185	-0.58587	-0.487995	-0.988525	0.8653	0.73984	0.23825	-0.02586	1.9052	2.23115	-0.32882	-0.38236	0.398	0.568265	NA	-3.10272	-0.31293	-0.54406	-1.87061	-1.01492	-2.35538	-1.14541
CERU_HUMAN	HYYIGIIETTWDYASDHGEK	1.69	-0.367	-1.04	0.30577	1.08	0.30577	2.313	1.58157	0.62877	0.81995	1.62348	1.50469	2.792	1.84115	1.57218	1.49796	1.89835	1.76587	1.66583	1.53419	2.88179	1.83586	-0.59249	-1.17667	2.31686	1.75627	1.71801	1.43456	2.78189	1.97949	2.17067	1.69804	2.9363	2.82904	1.30212	1.59125	2.23614	2.39516	1.46111	1.15318	1.01888	0.98723	2.35215	1.73074	2.07962	1.54513
CERU_HUMAN	MYSVNGYTFGSLPGLSMCAEDR	1.57	-0.677	-1.49	0.14364	2.22	0.14364	0.90878	1.42856	1.33803	1.38169	0.64125	0.28889	0.98467	1.36764	1.43019	1.43214	1.9943	2.22082	1.96366	1.68854	1.49936	1.92512	0.16466	-2.64473	2.32592	2.27916	2.02283	1.72591	1.96074	1.83693	1.90688	1.71521	3.2878	3.85789	1.97077	1.85208	2.14579	2.31628	1.55338	1.53192	1.53441	1.28345	0.873725	1.41497	1.14911	2.22022
CERU_HUMAN	MFTTAPDQVDKEDEDFQESNK	3.16	-0.115	-0.65	0.51724	0.43	0.51724	3.40679	3.29212	2.33769	2.42523	3.19123	3.2243	3.32701	3.54627	2.80806	2.69079	2.9716	2.9616	2.97032	3.08391	2.82118	2.84489	3.43449	3.52663	3.43007	3.7825	3.41529	3.51445	3.401	3.70681	3.59758	3.56314	4.20541	4.26222	2.93765	2.89897	3.41683	3.50205	2.38859	2.48352	2.93071	2.92374	2.45403	2.65555	2.98844	3.1328
CERU_HUMAN	KAEEEHLGILGPQLHADVGDKVK	-0.25	-0.182	-0.44	0.66269	0.19	0.66269	0.26884	-0.04197	-2.53189	NA	0.47942	0.20301	0.11759	0.288805	NA	NA	-1.21918	-0.85021	-0.17522	-0.34401	NA	-0.99296	0.14438	0.10801	-0.884905	NA	NA	-0.693935	0.39578	0.89797	0.33903	0.14221	1.81297	1.72199	-1.2308	NA	0.74258	0.494425	NA	NA	-1.4458	-1.78598	-2.1332	NA	-0.95673	NA
CERU_HUMAN	GPEEEHLGILGPVIWAEVGDTIR	3.18	-0.857	-1.35	0.18326	1.83	0.18326	3.04635	2.94155	3.05956	2.94567	2.91024	2.50258	2.9021	3.17563	3.33629	2.83807	3.80334	3.92758	3.70111	3.51305	3.2319	3.45786	0.6843	-3.83458	3.48576	3.41097	3.53906	3.34875	3.57664	3.53309	3.32267	3.4417	5.06958	5.2027	3.6724	3.53112	4.06804	3.97099	3.02745	2.85155	3.35942	3.22178	3.0391	3.51565	3.25584	3.62697
CERU_HUMAN	SGAGTEDSACIPWAYYSTVDQVK	2.06	-0.352	-1.62	0.11372	2.61	0.11372	1.94201	1.94032	0.31939	1.02255	2.17751	1.80782	1.85515	2.31585	1.62656	1.44397	1.82698	2.13317	1.86439	1.92541	1.7831	1.98323	2.13077	1.85606	2.70668	2.92391	2.86563	3.01531	2.06799	2.11116	2.76893	2.5868	2.31523	2.84477	1.79604	2.02896	2.3792	2.2131	1.64611	1.72386	2.05726	2.03215	1.56607	1.90327	2.35061	2.35968
CERU_HUMAN	HYYIGIIETTWDYASDHGEKK	0.53	-0.474	-1.01	0.32077	1.01	0.32077	1.59812	-0.29111	-0.65371	-0.92643	0.76407	0.73061	1.88995	0.670095	0.12261	0.01144	0.89602	0.47285	0.65773	0.3714	1.32212	0.29929	-2.42508	NA	0.737125	0.21191	0.443895	0.182855	1.86637	0.65003	0.90801	0.57423	2.35141	2.32485	0.26013	0.02104	1.23774	1.44402	0.13318	-0.561205	0.53377	-0.02406	1.06357	0.00504	0.24506	NA
CERU_HUMAN	SVPPSASHVAPTETFTYEWTVPK	3.25	-0.173	-0.78	0.43984	0.61	0.43984	3.46818	3.56297	1.95952	2.18347	3.34664	3.27532	3.3373	3.72876	3.01412	2.64869	2.91267	3.29603	3.33558	3.42283	2.90363	3.20915	3.181	3.07983	3.63227	3.82703	3.72889	3.81706	3.50056	3.88223	3.89664	3.92874	3.85777	4.26668	2.91779	3.00913	3.82144	3.75698	2.32999	2.71447	2.6853	2.75646	2.29656	2.82765	3.3987	3.39654
CERU_HUMAN	TYCSEPEKVDKDNEDFQESNR	0.34	-0.855	-1.07	0.29387	1.14	0.29387	NA	1.47334	-2.52704	NA	1.33844	1.73047	-0.31937	0.924175	0.58213	-3.06924	-0.01778	NA	0.31114	0.07546	NA	-2.73331	1.23032	1.52097	-1.49716	0.89428	0.813205	0.793925	1.72209	1.50886	NA	1.16588	1.70124	1.83519	-0.48743	-0.80374	1.0188	1.18674	NA	NA	NA	NA	-0.987795	NA	NA	0.569945
CERU_HUMAN	GVYSSDVFDIFPGTYQTLEMFPR	2.09	-0.666	-1.36	0.18129	1.85	0.18129	1.68805	1.71968	2.35692	2.30495	1.32633	0.03888	1.27837	2.43031	2.0162	1.83782	2.56078	2.66304	2.656	2.29108	1.88815	2.87625	-2.1488	NA	2.35473	2.61759	2.3492	1.41359	1.90226	2.62565	2.35654	1.52124	3.91128	4.67472	2.60613	2.69804	2.47846	2.66823	1.27287	1.80329	1.54288	1.4299	1.30136	2.41752	2.51327	3.09652
CERU_HUMAN	EFYLFPTVFDENESLLLEDNIR	-0.97	-0.572	-0.76	0.4564	0.58	0.4564	NA	NA	-0.91441	-2.07532	-2.71391	NA	NA	NA	-0.84904	NA	-0.34295	-1.24554	-0.93362	NA	NA	NA	NA	NA	NA	NA	NA	NA	NA	NA	-1.47017	NA	1.46485	1.31324	-0.15758	-0.82529	-1.28806	-0.525835	NA	NA	-1.89415	-3.03648	NA	NA	NA	NA
CERU_HUMAN	HYYIAAEEIIWNYAPSGIDIFTK	-0.6	-0.445	-0.77	0.44443	0.6	0.44443	-0.38671	-1.71783	-0.11844	-1.34624	-1.58277	-3.20852	-0.33073	-1.39688	-0.18414	-0.99414	0.04879	-0.1846	-0.11597	-1.25215	0.27482	-0.29961	NA	NA	-1.04835	-1.09039	0.582975	0.100295	0.67959	-0.14641	-0.37757	-1.47073	2.27608	2.1372	0.10089	-0.22505	0.23111	-0.056385	-2.58839	-3.81528	-1.18741	-1.98681	-1.19542	-0.92206	0.48845	-0.325685
CERU_HUMAN	ERGPEEEHLGILGPVIWAEVGDTIR	3.61	-0.448	-0.85	0.40115	0.72	0.40115	3.66612	3.48399	3.98777	3.87993	3.63613	3.54488	3.44244	3.67042	4.10729	3.91652	3.47726	3.50466	3.50277	4.24911	3.91531	4.26076	1.07497	-1.83	4.16876	4.06455	4.09863	3.73418	4.095	4.14989	4.03089	3.77384	5.65488	4.60991	3.17021	3.03612	5.00728	4.81715	3.93966	3.63606	1.74536	2.98758	3.86709	3.08347	3.3978	3.84082
CERU_HUMAN	WYLFGMGNEVDVHAAFFHGQALTNK	0.07	-0.358	-0.76	0.45383	0.57	0.45383	-0.13484	-0.31575	0.49864	-0.54962	-0.12751	0.23943	-0.16345	-0.751635	0.11981	-0.02019	0.47255	-0.07135	0.66284	-0.40744	0.98015	-0.00533	-1.01315	-1.54935	-0.513585	0.42153	0.222145	-0.813615	1.15544	0.46332	0.17755	-1.43475	2.38045	2.05113	0.84672	0.28224	1.35878	0.811055	-0.41322	-1.91453	0.20316	-0.45794	0.306665	-0.10125	-0.37252	0.188335
CERU_HUMAN	DVDKEFYLFPTVFDENESLLLEDNIR	-0.34	-0.348	-0.97	0.33946	0.94	0.33946	-0.80882	-0.9671	-0.295	-1.17426	-1.18881	-1.97743	-0.85764	-0.547925	-0.43149	-1.00111	0.11996	0.07009	0.16794	-0.13269	-0.48538	-0.12928	NA	NA	0.126555	0.15556	-0.056925	-0.951785	-0.47263	-0.17621	-0.35768	-0.78968	1.89794	2.14424	0.03306	-0.11512	0.45057	0.261305	-1.04185	-1.87926	-0.52276	-0.98859	-1.1076	-0.41514	0.23596	0.415305
CERU_HUMAN	QKDVDKEFYLFPTVFDENESLLLEDNIR	1.69	-0.481	-1.63	0.11087	2.66	0.11087	1.39539	1.34302	1.1358	1.18685	1.50262	1.44572	1.4608	1.70775	1.37511	1.16297	1.94486	2.22214	2.10314	1.99684	1.77315	1.92674	-1.07939	NA	1.90593	1.98275	1.70578	1.17544	2.27767	2.21768	1.6522	1.45337	3.491	3.68403	1.7714	1.8084	2.45618	2.63631	0.82879	1.01093	1.74567	1.37406	1.30968	1.85116	1.18145	1.82777
CERU_HUMAN	GDSVVWYLFSAGNEADVHGIYFSGNTYLWR	-3.59	-0.174	-0.21	0.84017	0.04	0.84017	NA	NA	NA	NA	NA	-3.2134	NA	NA	NA	NA	NA	NA	NA	NA	NA	NA	NA	NA	NA	-4.71073	NA	NA	-4.85428	NA	-4.56606	NA	-1.49968	-1.5247	NA	-4.52244	-3.69785	-3.72542	NA	NA	NA	NA	NA	NA	NA	NA
CERU_HUMAN	RDTANLFPQTSLTLHMWPDTEGTFNVECLTTDHYTGGMK	-1.14	NA	NA	NA	NA	NA	NA	NA	NA	NA	NA	NA	NA	NA	NA	NA	NA	NA	NA	NA	NA	NA	NA	NA	NA	NA	NA	NA	NA	NA	NA	NA	-0.99593	-1.27655	NA	NA	NA	NA	NA	NA	NA	NA	NA	NA	NA	NA
CF153_HUMAN	QLVAGNSPK	-6.84	NA	NA	NA	NA	NA	NA	NA	-6.31906	NA	NA	NA	NA	NA	-7.11478	NA	NA	NA	NA	NA	NA	NA	NA	-7.09964	NA	NA	NA	NA	NA	NA	NA	NA	NA	NA	NA	NA	NA	NA	NA	NA	NA	NA	NA	NA	NA	NA
CFAB_HUMAN	VASYGVKPR	-0.16	-0.603	-1.45	0.16599	2.11	0.16599	NA	-1.12133	NA	NA	-0.83118	NA	NA	-0.336915	NA	NA	NA	NA	NA	NA	NA	NA	-0.55168	NA	NA	-0.66594	0.147875	0.163455	NA	NA	NA	-1.13024	1.39918	1.0318	NA	NA	0.80522	0.664325	NA	-0.891825	NA	NA	-0.906195	NA	NA	NA
CFAB_HUMAN	CLVNLIEK	0.84	-0.231	-1	0.3255	0.99	0.3255	0.70927	0.9313	-0.07142	0.06006	0.86668	0.98076	0.72661	0.957755	0.3141	0.02225	1.24029	1.15344	0.69679	0.93431	0.93424	0.75997	0.78156	1.16938	0.424835	0.8457	1.73144	1.82005	0.68141	1.19687	0.52116	0.67514	2.16881	2.09646	0.92762	0.89512	1.97087	2.0669	0.29808	0.549755	0.2819	0.33178	0.579535	0.50421	-0.34635	0.108925
CFAB_HUMAN	DISEVVTPR	2.1	-0.164	-0.67	0.50565	0.45	0.50565	1.84891	2.0852	0.62547	1.1456	2.24654	2.37489	1.95527	2.05586	1.58068	1.38037	2.41651	2.89792	1.78442	2.16387	2.18315	2.1806	2.30449	2.5219	1.82858	2.34458	2.90713	3.07621	2.10841	2.17667	1.82629	2.06797	2.65426	3.15911	2.07958	2.14431	3.02289	3.34897	1.68125	1.91281	1.44702	1.20234	1.89176	1.85915	1.23883	NA
CFAB_HUMAN	DNEQHVFK	-3.05	NA	NA	NA	NA	NA	NA	NA	NA	NA	NA	NA	NA	NA	NA	NA	NA	NA	NA	NA	NA	NA	NA	NA	NA	NA	NA	-3.53323	NA	NA	NA	NA	NA	NA	NA	NA	NA	NA	NA	NA	NA	NA	NA	NA	NA	-2.57428
CFAB_HUMAN	LQDEDLGFL	1.63	-0.222	-0.76	0.45219	0.58	0.45219	0.6638	1.92845	0.13141	0.21693	1.89564	1.85183	1.21848	1.37257	0.82475	1.10791	2.4511	2.58677	1.76135	1.63833	1.65896	2.06666	2.10494	1.97898	1.2323	1.62357	2.54236	2.52251	1.29074	1.49899	1.66177	1.34034	2.72867	3.02032	1.64726	1.94389	2.45351	2.80788	1.63672	1.55622	1.17694	1.08224	1.01801	1.47153	0.41343	0.943395
CFAB_HUMAN	ALFVSEEEK	1.31	NA	NA	NA	NA	NA	NA	NA	NA	NA	NA	NA	NA	NA	NA	NA	NA	NA	NA	NA	NA	NA	NA	NA	NA	NA	NA	NA	NA	NA	NA	NA	NA	1.31418	NA	NA	NA	NA	NA	NA	NA	NA	NA	NA	NA	NA
CFAB_HUMAN	GDSGGPLIVHK	0.66	-0.225	-1	0.32556	0.99	0.32556	0.03867	0.30839	-0.25021	-0.10231	0.34122	0.22553	0.72646	0.576955	0.15206	-0.20715	1.29371	1.80283	0.59554	0.78121	0.66864	0.72235	0.63217	0.76795	0.693955	0.76294	1.30636	1.50049	0.44455	0.69793	0.19405	0.34024	1.98673	2.03851	0.88067	0.81081	1.6149	1.69243	0.18768	0.471605	0.12186	0.1459	0.458005	0.49535	NA	-0.263625
CFAB_HUMAN	DAQYAPGYDK	-0.61	0.027	0.08	0.93922	0.01	0.93922	-1.39549	-1.65878	NA	-1.78236	-0.15889	-0.38928	-0.52492	-0.822645	-0.59351	-1.15641	-0.15064	0.54917	-0.5394	-0.63774	-0.21147	-0.84279	-0.252	0.1511	-0.694705	-0.63759	-0.083945	0.368235	-0.48117	-0.49842	-1.68784	-2.00625	0.66745	0.998745	-0.61825	-0.42361	0.85645	0.849985	-0.99297	-0.705385	-1.34211	-1.20041	-0.602735	-1.46578	-2.95051	NA
CFAB_HUMAN	EELLPAQDIK	3.59	-0.194	-0.78	0.43701	0.62	0.43701	3.22155	3.65045	2.02311	2.77206	3.58116	3.75216	3.4629	3.60046	3.30665	3.11606	3.89501	4.0481	3.49183	3.68954	3.58887	3.51415	3.71247	4.25889	3.42415	3.69299	4.15752	4.42056	3.32927	3.87866	3.31551	3.44207	4.71004	4.79087	3.68259	3.65021	4.60239	4.64067	3.18922	3.43562	3.09375	2.69802	3.44027	3.18912	2.78444	3.2271
CFAB_HUMAN	ALFVSEEEKK	0.63	-0.147	-0.35	0.73358	0.12	0.73358	-0.26228	0.36348	NA	NA	NA	0.39825	NA	0.517145	NA	NA	NA	1.40125	NA	NA	NA	0.50552	NA	0.85971	NA	0.59132	1.3876	NA	NA	0.13304	NA	0.43469	NA	2.12505	NA	NA	1.71884	1.99422	NA	NA	NA	NA	NA	0.18753	-1.0734	-0.490285
CFAB_HUMAN	GDSGGPLIVHKR	-3.74	-0.504	-0.59	0.56342	0.35	0.56342	-2.22189	-2.63485	NA	NA	NA	NA	NA	-4.55114	NA	NA	NA	NA	NA	NA	NA	NA	-5.0785	NA	-5.68156	NA	-2.39784	-3.16768	NA	NA	-3.91906	NA	-4.93909	NA	NA	NA	-3.49375	-4.8128	NA	-6.0697	NA	NA	NA	NA	-1.90013	-1.55245
CFAB_HUMAN	VKDISEVVTPR	0	-0.385	-1.02	0.32086	1.04	0.32086	NA	-0.58018	NA	NA	NA	NA	NA	NA	NA	NA	0.21816	NA	-0.36613	-0.19189	-0.71904	-0.26363	-0.2458	-0.19585	NA	NA	0.500655	0.601965	NA	-1.16973	-0.48057	-0.12995	1.13833	0.958995	NA	NA	0.83631	1.06689	NA	NA	NA	NA	-0.827795	-0.21498	NA	NA
CFAB_HUMAN	YGLVTYATYPK	2.13	-0.329	-1.53	0.13244	2.36	0.13244	1.79324	1.96901	0.95928	1.21234	1.78541	1.88864	1.81637	2.13948	1.61877	1.45761	2.76568	2.80534	2.04957	2.1897	2.00313	2.20906	2.04972	2.29194	1.94331	2.2812	2.90468	3.08232	1.90893	2.34637	1.85519	1.9571	3.33702	3.39527	2.362	2.34293	3.1975	3.29324	1.74655	1.88454	1.74573	1.65483	1.87096	2.05763	1.29677	1.57482
CFAB_HUMAN	LPPTTTCQQQK	-1.69	-0.76	-1.87	0.06856	3.5	0.06856	-4.00624	-3.16693	-3.45319	-3.21165	-1.89705	-2.00369	-1.49822	-1.79631	-2.52162	-3.01445	-1.29486	-0.15702	-2.04501	-1.67991	-1.27154	-2.11916	-1.79261	-0.90017	-1.85957	-1.67981	-1.76141	-0.917875	-0.88064	-0.62082	-1.50227	-1.15311	0.03336	0.216645	-0.66782	-0.49926	-0.5113	-0.202705	-2.88068	-2.36738	-1.62381	-1.49099	-1.20745	-2.0106	-3.37153	-2.74591
CFAB_HUMAN	EKLQDEDLGFL	0.26	-0.405	-1.41	0.16717	1.98	0.16717	-0.3131	0.10834	-1.66193	-1.36146	-0.0236	0.04399	0.15029	0.551195	-0.51312	-0.83507	0.95868	1.15287	0.385	0.66234	0.38204	0.26678	0.28042	0.74105	-0.229025	0.35567	1.00436	1.41839	-0.06221	0.47876	0.05896	0.31661	1.29345	1.72748	0.36835	0.45884	1.59759	1.71557	-0.0351	0.291145	0.26646	0.03505	-0.147285	0.08626	-0.94887	-0.724615
CFAB_HUMAN	LEDSVTYHCSR	1.93	-0.198	-0.8	0.43017	0.63	0.43017	1.2669	1.3212	0.72222	0.92833	1.93327	1.83258	2.13449	2.22437	1.66482	1.2074	2.36232	2.93342	1.84192	2.10084	1.98144	1.94066	2.00896	2.2577	1.83967	2.10738	2.42033	2.74628	2.08366	2.29301	1.57279	1.63189	3.10207	3.54691	2.03129	2.06466	2.7965	3.13655	1.44449	1.57525	1.35095	1.52444	1.8113	1.66631	0.68676	1.08085
CFAB_HUMAN	QLNEINYEDHK	0.75	-0.202	-0.6	0.55238	0.36	0.55238	0.12712	0.65857	-1.58512	-1.46507	0.91204	1.00621	1.18664	1.191	0.17847	0.31282	1.28831	1.57931	0.60403	1.09548	1.0011	0.83903	1.10081	1.15435	0.574395	1.21259	1.48325	1.73266	0.83968	1.04881	0.31416	0.69869	1.77375	2.7483	0.51836	0.80268	2.0333	2.40259	0.10364	0.640445	-0.26768	0.05072	0.763075	0.47758	-0.71085	-0.439225
CFAB_HUMAN	GTDYHKQPWQAK	-2.88	-1.282	-2.07	0.08091	4.29	0.08091	NA	NA	NA	NA	NA	NA	-3.90602	NA	NA	NA	NA	NA	NA	NA	NA	NA	NA	NA	NA	NA	NA	NA	NA	NA	NA	NA	-2.65672	-2.71357	NA	NA	-2.68317	-2.44143	NA	NA	NA	NA	NA	NA	NA	NA
CFAB_HUMAN	VSEADSSNADWVTK	2.37	-0.262	-1.13	0.26706	1.27	0.26706	NA	2.18352	1.3369	1.68821	2.27885	2.32862	2.45834	1.64814	1.86129	1.76727	2.70455	2.98909	2.24484	2.43736	2.46784	2.31763	2.52901	2.54825	2.27601	2.59443	3.0615	2.82187	2.34251	1.90302	2.09559	2.19739	3.38643	3.37737	2.3983	2.42179	3.29688	3.75237	1.90279	2.12175	1.80139	1.94562	2.12778	2.13643	NA	NA
CFAB_HUMAN	DFHINLFQVLPWLK	1.91	-1.593	-1.55	0.1772	2.41	0.1772	NA	NA	1.49067	NA	NA	NA	NA	NA	NA	NA	NA	NA	0.74422	NA	NA	NA	NA	NA	NA	NA	NA	NA	NA	NA	NA	NA	NA	4.10843	NA	NA	NA	1.31245	NA	NA	NA	NA	NA	NA	NA	NA
CFAB_HUMAN	EAGIPEFYDYDVALIK	2.38	-0.578	-2.28	0.028	5.19	0.028	1.94874	2.2509	1.70291	1.75083	1.77726	1.82863	1.04932	1.22601	1.94849	1.86572	3.4483	3.60725	2.57088	2.511	2.41172	2.44073	1.6866	1.46975	2.02955	2.35923	3.10419	3.25081	2.07352	2.20211	2.14921	2.16975	4.11827	4.20681	2.81608	2.7363	3.85834	3.66371	2.31418	2.34577	2.39504	2.39236	2.04012	2.44576	1.29466	1.87519
CFAB_HUMAN	FLCTGGVSPYADPNTCR	2.9	-0.257	-1.08	0.2849	1.17	0.2849	2.46027	2.66458	2.07388	2.41596	2.48927	2.40472	2.82327	2.98778	2.45391	2.33247	3.62017	3.9721	2.73705	2.97246	2.85415	2.98029	2.6915	2.80235	2.62552	3.08873	3.53084	3.71577	2.56177	3.05665	2.42727	2.45431	4.28483	4.46138	3.14299	3.14552	3.90263	4.04359	2.46695	2.82742	2.50871	2.6326	2.50558	2.90665	1.83345	2.1793
CFAB_HUMAN	KEAGIPEFYDYDVALIK	3.1	-0.366	-1.01	0.31608	1.03	0.31608	2.78373	3.71454	2.18234	2.45359	4.09505	2.59	3.30314	2.22526	2.34128	2.3386	3.75417	3.94478	2.91998	2.85841	3.79264	3.01352	2.30532	2.23726	2.63979	2.78604	3.5999	3.7445	2.59894	2.91469	2.50158	3.42981	4.38021	4.65623	3.33345	3.34392	4.33534	4.0808	2.79071	2.78342	2.81778	3.66872	3.16635	2.99173	2.46681	1.9974
CFAB_HUMAN	DLEIEVVLFHPNYNINGK	-3.77	-0.062	-0.08	0.9394	0.01	0.9394	NA	NA	NA	NA	NA	NA	NA	NA	NA	NA	-3.94364	NA	NA	NA	-3.67825	NA	NA	NA	NA	NA	-4.8358	NA	-4.04045	NA	NA	NA	-2.371	NA	NA	NA	NA	NA	NA	NA	NA	NA	NA	NA	NA	NA
CFAB_HUMAN	YGQTIRPICLPCTEGTTR	2.44	-0.263	-1.02	0.31521	1.03	0.31521	2.18672	2.46033	1.28047	1.73206	2.11343	2.17456	2.27789	2.61639	2.06905	1.8939	3.10774	3.44997	2.10398	2.41221	2.22608	2.24364	2.49016	2.82453	1.95888	2.57739	3.15745	3.43908	2.11631	2.62138	1.86525	2.13499	3.8962	4.0392	2.59233	2.63221	3.54024	3.63178	1.9279	2.17137	2.15267	2.14854	2.20117	1.95935	1.36155	1.86244
CFAB_HUMAN	RDLEIEVVLFHPNYNINGK	1.44	-0.486	-0.57	0.58429	0.33	0.58429	NA	NA	NA	NA	NA	NA	NA	NA	NA	NA	1.17178	1.06325	NA	NA	NA	NA	NA	NA	NA	NA	NA	NA	NA	NA	NA	NA	2.08238	2.12486	NA	NA	1.49965	0.705895	NA	NA	NA	NA	NA	NA	NA	NA
CFAB_HUMAN	AIHCPRPHDFENGEYWPR	1.15	-0.274	-0.8	0.43295	0.64	0.43295	NA	0.63552	NA	-0.4208	0.63876	0.4581	1.47954	1.61021	NA	NA	1.69001	1.71609	NA	NA	NA	1.09012	NA	NA	NA	NA	NA	1.50019	0.84129	0.96868	0.80507	0.70557	2.84396	2.68515	0.97271	0.76241	2.1311	1.9241	NA	NA	0.57545	NA	0.412245	NA	0.32608	NA
CFAB_HUMAN	WSGQTAICDNGAGYCSNPGIPIGTR	1.13	-0.37	-1.32	0.19271	1.75	0.19271	0.74059	0.78591	-0.11977	0.68429	0.76482	0.63335	0.99093	1.45918	0.71613	0.60114	1.84612	2.09875	1.08397	1.29366	1.05063	1.32884	0.56104	0.30989	0.681505	1.47274	1.73243	2.00777	0.86313	1.30017	0.68639	0.73313	2.54394	2.90576	1.38182	1.49323	2.15078	2.38865	0.5368	1.09635	0.91956	1.31951	0.700325	0.76077	0.22245	0.635005
CFAB_HUMAN	HVIILMTDGLHNMGGDPITVIDEIR	0.59	-0.486	-0.92	0.36086	0.85	0.36086	0.39625	-0.8209	0.77345	0.54029	-2.10675	-2.74629	0.47064	-0.593155	0.70894	0.06608	1.99959	2.18659	0.90703	0.31867	2.09832	0.92047	NA	NA	0.570875	0.35981	1.74541	0.878465	0.87598	0.05937	-1.1414	-2.27377	2.79598	3.04509	1.48521	1.27165	1.98077	2.07714	0.87012	0.371565	0.49508	0.06137	1.23259	1.1632	-0.08415	-0.469255
CFAB_HUMAN	LLQEGQALEYVCPSGFYPYPVQTR	3.82	-0.524	-2.17	0.0362	4.71	0.0362	NA	3.65294	2.99189	3.22042	3.09462	3.05027	3.36928	3.64798	3.38456	3.26501	4.5353	4.84497	3.89062	3.95546	3.59142	4.031	2.54711	NA	3.33339	3.61412	4.38225	4.26164	3.33439	3.61175	3.68496	3.69769	4.94791	5.47483	4.24708	4.36445	4.78572	4.88778	3.68803	3.87168	3.55341	3.42502	3.36015	3.96402	NA	3.61217
CFAB_HUMAN	FLCTGGVSPYADPNTCRGDSGGPLIVHK	0.15	-0.727	-1.82	0.08793	3.32	0.08793	NA	NA	NA	NA	NA	NA	-0.55659	-0.171575	NA	NA	0.19851	0.05361	-0.91923	-0.74556	NA	NA	NA	NA	NA	NA	0.451505	0.432895	NA	NA	NA	NA	1.10494	1.3775	-0.2188	NA	0.80608	0.752505	NA	NA	NA	NA	NA	-0.52374	NA	NA
CFAB_HUMAN	GHESCMGAVVSEYFVLTAAHCFTVDDK	-2.73	-0.686	-0.9	0.37398	0.81	0.37398	-3.6536	-3.69791	-3.76161	-4.05067	-3.43024	-2.41418	-2.87147	-4.91409	-3.95925	-4.01721	-0.65653	-1.44227	-3.12131	-4.00692	-0.79025	-3.38572	-3.75973	NA	-2.09721	-2.15692	-1.31065	-2.2035	-2.07227	-3.63773	NA	NA	0.38738	-0.462425	-2.40836	-3.05195	-0.77066	-1.15596	-2.38396	-3.78029	-3.42063	-5.10279	-1.40521	-4.06724	NA	-3.30863
CFAD_HUMAN	VASYAAWIDSVLA	-0.98	-0.945	-2.41	0.02056	5.8	0.02056	-1.86693	-1.9311	-0.52356	-0.5025	-2.6819	-2.50023	-2.72318	-2.54472	-1.27131	-1.63565	-0.45709	-0.38726	0.31893	0.21836	-1.11126	-0.6782	-1.66718	-4.09092	-1.46043	-1.59586	-1.63365	-1.47334	-0.8542	-0.9176	-0.4708	-0.26516	-0.49812	-0.009365	-0.09394	-0.14192	-0.58701	-0.503145	-0.10133	-0.200295	-1.16063	-1.01468	-0.349305	-0.09077	-0.10424	0.272485
CFAD_HUMAN	ATLGPAVRPLPWQR	1.34	-0.388	-2.52	0.01568	6.35	0.01568	0.80788	0.61227	1.1071	1.1136	0.76083	0.55034	1.26379	1.44959	0.8937	0.6972	1.26963	1.42858	1.94931	1.96412	0.83521	1.00779	1.71485	1.7764	0.750835	0.89008	1.27815	1.28045	1.59242	1.91546	1.64718	1.76424	1.63722	1.3817	1.89743	1.78873	1.46436	1.49401	1.22346	1.12817	1.47926	1.34762	1.35458	1.4228	1.6746	1.83363
CFAD_HUMAN	RPDSLQHVLLPVLDR	1.08	-0.368	-2.12	0.0404	4.49	0.0404	1.08255	0.84595	0.87599	NA	0.89715	0.95566	1.13322	1.22996	0.65032	0.40116	0.66947	0.89623	1.55587	1.39884	0.85059	0.43085	1.14197	1.25216	0.249255	0.47803	1.18569	1.06011	1.62495	1.71266	1.57804	1.49955	1.40316	1.50615	1.48732	1.46637	1.47675	1.07439	0.6579	0.829515	0.7994	0.71663	0.883885	1.0148	1.88919	1.35905
CFAD_HUMAN	VQVLLGAHSLSQPEPSKR	-0.82	-0.24	-0.48	0.64346	0.23	0.64346	NA	NA	NA	NA	NA	NA	-0.01355	NA	NA	NA	NA	NA	-1.25758	NA	-1.58728	NA	NA	NA	NA	NA	NA	NA	NA	NA	NA	NA	NA	-0.508305	NA	-1.34116	NA	NA	NA	-0.816015	NA	NA	NA	-0.18511	NA	NA
CFAD_HUMAN	GDSGGPLVCGGVLEGVVTSGSR	0.56	-0.281	-1.19	0.24066	1.42	0.24066	-0.55028	0.19451	-0.25472	0.2496	0.25406	0.4333	0.35767	0.743405	0.28779	0.0328	0.28376	0.29197	1.24544	1.33608	0.18876	0.24206	1.20239	1.2846	-0.014935	0.57017	0.434525	0.824565	0.99989	1.55687	0.90143	1.26976	0.4565	0.829645	0.87455	0.8955	0.70374	0.841815	0.28452	0.684295	-0.03272	0.03014	0.247985	0.25429	0.73859	1.2044
CFAH_HUMAN	NGFYPATR	-1.39	-0.049	-0.21	0.83266	0.05	0.83266	-1.449	-1.42245	-2.02619	-2.17949	-0.99648	-1.31646	-1.55392	-2.28221	-1.83869	-2.22748	-1.09242	-1.37577	-1.31073	-1.64485	-1.24123	-1.34547	-0.45847	-0.27051	-1.27652	-1.00314	-1.26514	-1.26079	-1.01499	-1.5588	-1.0446	-1.19813	-1.02181	-1.39675	-1.99484	-2.0348	-0.66197	-0.671305	-1.77455	-2.22613	-2.02951	-1.91425	-1.28022	-1.53046	-0.67301	-0.784725
CFAH_HUMAN	NDFTWFK	1.04	-0.175	-0.9	0.37484	0.81	0.37484	1.19466	0.66231	0.59625	0.59367	0.78618	0.3718	0.80687	1.04947	0.85746	0.52532	1.22845	1.44116	1.062	0.86178	0.96863	1.22354	1.26422	0.83764	1.26128	1.2771	1.15833	1.01021	1.16295	1.42705	1.40417	1.26625	1.47728	NA	NA	0.54562	1.73226	1.7153	0.77065	0.686695	0.57523	NA	0.489955	1.00476	1.63478	1.56886
CFAH_HUMAN	FVCNSGYK	-0.02	-0.234	-0.74	0.46642	0.55	0.46642	-2.11902	NA	NA	NA	0.08671	NA	-0.08549	NA	-0.03954	NA	NA	NA	NA	NA	0.04529	-0.05017	0.2987	0.66738	0.004025	0.35181	NA	-0.096135	0.11901	0.23108	-0.20077	NA	-0.20514	0.214625	NA	NA	NA	0.384485	NA	NA	NA	NA	NA	-0.04219	-0.11473	0.163865
CFAH_HUMAN	LEYPTCAK	0.29	0.081	0.37	0.71177	0.14	0.71177	0.03051	0.68464	-0.16366	-0.26976	0.54666	0.59386	0.41064	0.576845	0.06043	-0.05629	0.03152	0.19021	-0.01978	0.28397	0.37149	0.42777	0.79074	1.03372	0.408645	0.75546	-0.418995	0.037455	0.53837	0.92949	0.4169	0.85464	-0.37092	0.364765	-0.05997	-0.13803	0.26064	0.582865	-0.12534	0.062505	-0.30889	-0.21071	0.615185	0.25167	0.72146	1.05794
CFAH_HUMAN	NGQWSEPPK	-1.99	-0.168	-0.51	0.61143	0.26	0.61143	NA	-2.45478	-3.01872	-2.91512	NA	-1.47666	NA	-1.79757	NA	NA	-2.36017	-2.32642	-2.55144	-2.366	NA	NA	-1.13827	-1.22616	NA	NA	NA	NA	-2.09771	-1.90118	NA	-2.03537	-2.17918	-1.17579	-2.13358	-2.24599	-0.82425	-0.615375	-2.25575	NA	NA	-2.89019	-1.83648	NA	NA	NA
CFAH_HUMAN	IDVHLVPDR	-0.04	-0.146	-0.73	0.47161	0.53	0.47161	0.66789	0.49616	-0.62414	-0.89645	-0.39276	-0.54319	-0.27549	-0.226555	-0.25088	-0.18795	0.08673	0.34932	-0.0751	-0.52236	-0.39337	-0.28014	0.03455	0.54463	0.219315	0.08901	0.218155	0.355015	-0.44468	-0.20447	0.23331	0.45705	0.28217	-0.127715	-0.36032	-0.63113	0.4822	0.278535	-0.40303	-0.311715	-0.27656	-0.49258	-0.401835	-0.12615	1.05916	1.15477
CFAH_HUMAN	IVSSAMEPDR	-1.06	-0.004	-0.01	0.99	0	0.99	NA	-1.46194	NA	NA	NA	NA	NA	-1.61356	NA	NA	NA	NA	NA	NA	NA	NA	NA	-0.72379	NA	-0.60523	NA	NA	NA	-1.2154	NA	-1.23152	-1.09112	-0.871865	NA	NA	NA	NA	NA	NA	NA	NA	-1.3256	NA	-0.79366	-0.754205
CFAH_HUMAN	EYHFGQAVR	-2.01	0.137	0.48	0.63553	0.23	0.63553	-1.77144	-1.57526	-2.20819	-2.47564	NA	-2.89248	-1.88549	-2.21843	-2.28685	-2.0977	-1.45355	-1.3157	-1.8283	-1.92528	-1.97539	-1.77006	-1.78487	-2.06505	NA	-1.74774	-1.757	-1.82258	NA	-4.31327	-1.70052	-1.48143	NA	NA	-2.24102	-2.30101	NA	-1.05188	-3.05529	-2.50104	-2.43068	-2.4805	-1.9915	-1.75708	-1.44293	-0.792875
CFAH_HUMAN	WSHPPSCIK	-0.32	-0.172	-0.99	0.32585	0.99	0.32585	-0.98347	-0.42283	-0.37027	-0.32176	-1.10407	-1.18076	-0.24591	-0.585145	-0.68682	-0.64043	-0.26295	-0.155	-0.25443	-0.378	-0.3328	0.02159	-0.23385	-0.35208	0.126535	0.2162	-0.304055	-0.171405	-0.45688	-0.52709	-0.03832	0.10945	0.00401	0.268115	-0.45298	-0.50669	0.26244	0.119975	-0.86841	-0.692235	-0.50531	-0.56619	-0.705055	-0.40567	0.34617	0.383015
CFAH_HUMAN	EFDHNSNIR	-2.52	0.238	0.55	0.59182	0.31	0.59182	NA	NA	NA	NA	NA	NA	NA	-2.82456	NA	NA	NA	NA	NA	-2.45527	NA	NA	NA	-1.92225	-2.42656	NA	NA	-2.8518	NA	NA	-2.93549	-2.37756	NA	NA	NA	NA	NA	NA	NA	NA	NA	NA	NA	NA	-2.65956	-2.2311
CFAH_HUMAN	RPYFPVAVGK	1.58	-0.083	-0.41	0.68058	0.17	0.68058	2.18626	1.85022	1.39858	0.84354	1.50198	1.04315	1.718	1.69883	1.14756	0.95678	1.7726	1.77529	1.68367	1.2721	1.45707	1.50673	1.83354	1.59812	1.84993	1.59246	1.67826	1.6019	1.42105	1.50347	2.01529	1.85067	2.04926	1.66292	1.39532	1.10425	2.25772	1.68921	1.19725	1.0326	1.28989	1.05382	1.2895	1.6322	2.36925	2.25075
CFAH_HUMAN	SLGNVIMVCR	2.08	-0.094	-0.41	0.6845	0.17	0.6845	2.69364	2.70426	1.29125	1.52082	2.16189	2.19563	1.07066	1.35425	NA	NA	1.49508	1.7395	2.26217	2.39585	1.46862	1.6136	2.6394	2.72506	2.52831	2.73031	2.53749	2.61641	1.23697	1.51639	1.84432	1.9547	2.64776	2.8259	2.29411	2.3146	2.57323	2.73888	1.04486	1.3035	1.23987	1.07501	2.35636	2.49189	2.87291	3.05007
CFAH_HUMAN	GEWVALNPLR	-2.27	0.004	0.02	0.98745	0	0.98745	-1.61875	-1.73524	NA	NA	-2.27079	-2.43029	-2.29983	-2.14126	-2.66694	NA	-1.95166	-1.99845	-2.49154	NA	-2.83262	-2.30841	-2.05598	-2.26889	-2.55954	-2.11348	-2.61603	-3.09143	-3.01774	-2.44223	-2.12806	-2.0684	-1.40653	NA	NA	NA	-1.3607	-1.5117	-3.3093	-2.97955	NA	NA	-2.88809	-2.40945	-1.79476	-1.74555
CFAH_HUMAN	TGESVEFVCK	1.95	0.061	0.36	0.72098	0.13	0.72098	1.66204	1.93717	1.46945	1.68427	1.93744	2.00828	1.94397	1.50152	1.85466	1.86008	1.79519	1.9709	1.90649	2.07556	2.08631	1.98752	2.50469	2.64174	2.27366	2.52437	2.03014	1.92715	2.05356	1.68106	2.13291	2.25843	1.65995	1.71467	1.67754	1.74495	1.98705	2.4932	1.49555	1.69969	1.50759	1.57617	1.80102	1.69028	2.53375	2.74659
CFAH_HUMAN	CLPVTAPENGK	-1.04	0.311	0.37	0.71152	0.14	0.71152	-3.22762	0.09395	-2.17825	-2.08559	-0.1196	-0.28692	-0.56314	-0.406405	-1.55466	-1.32417	-1.23443	-1.20464	-2.83073	-0.47321	-0.64009	-0.10144	0.38094	0.46042	-0.542795	0.08334	-3.28395	-0.235125	-0.49206	-5.06087	-0.47443	-0.1397	-0.97038	-0.927735	-1.90929	-1.53219	-0.88241	-0.194875	-1.87508	-0.807885	-1.724	-1.93412	-0.991345	-0.58209	-0.07624	0.127015
CFAH_HUMAN	IDVHLVPDRK	-0.94	NA	NA	NA	NA	NA	NA	NA	NA	NA	NA	NA	NA	NA	NA	NA	NA	NA	NA	NA	NA	NA	NA	NA	NA	NA	NA	NA	NA	NA	NA	NA	NA	NA	NA	NA	NA	-1.08713	NA	NA	NA	NA	NA	NA	NA	-0.787515
CFAH_HUMAN	HGGLYHENMR	-1	0.236	0.25	0.81586	0.06	0.81586	NA	NA	NA	NA	NA	NA	NA	NA	NA	NA	NA	-0.88675	NA	NA	NA	NA	NA	NA	NA	NA	NA	NA	NA	NA	NA	NA	NA	NA	NA	NA	NA	NA	NA	NA	NA	NA	NA	NA	NA	-1.12309
CFAH_HUMAN	TGDEITYQCR	1.41	0.087	0.4	0.69233	0.16	0.69233	0.95901	1.50955	0.66693	1.13225	1.55964	1.55876	1.34725	1.48603	1.34101	1.08129	1.15776	1.87613	1.21336	1.47278	1.55229	1.46588	1.94434	2.31124	1.52286	1.83916	1.0471	1.45897	1.44396	1.89963	1.38461	1.70185	1.3431	1.77963	0.91497	0.96293	1.79162	1.90295	0.92584	1.11789	0.63399	0.93763	1.35441	1.33186	1.42442	1.8961
CFAH_HUMAN	CTSTGWIPAPR	0.51	0.066	0.16	0.87114	0.03	0.87114	NA	NA	0.1185	0.18536	0.48926	0.85164	0.47812	-0.490815	0.90269	0.88128	0.62005	0.86617	0.548	0.80178	0.71097	NA	0.47187	1.55966	0.526885	0.09821	0.525115	0.690525	0.38921	0.10381	0.9114	NA	0.99211	1.07147	0.31607	0.58084	1.20947	1.24453	0.07808	-0.558155	0.23814	0.2249	0.553155	-1.70662	NA	1.28622
CFAH_HUMAN	WQSIPLCVEK	3.33	-0.1	-0.68	0.49737	0.47	0.49737	3.32189	3.41679	3.11261	3.24727	2.89893	2.85451	3.07175	3.27366	3.15156	3.01896	3.36845	3.68731	3.27762	3.29814	3.19086	3.22569	3.44615	3.59728	3.41393	3.79563	3.2302	3.34058	3.16671	3.5257	3.37772	3.5513	3.63804	3.6917	3.02628	3.09597	3.71913	3.72767	2.8707	3.07818	3.13319	3.23632	3.15916	3.17906	3.85385	4.0624
CFAH_HUMAN	DGWSAQPTCIK	1.63	-0.011	-0.05	0.95762	0	0.95762	1.66466	1.96863	0.9212	1.22452	1.60057	NA	1.51001	1.76755	1.36056	1.0909	1.42317	1.74336	1.40893	1.42088	1.73079	1.72621	2.00581	2.26098	1.7636	2.26536	1.46381	1.80556	1.76195	2.24878	1.75479	1.96346	1.61084	2.06936	0.97235	1.06418	2.05257	2.24101	1.1698	1.27365	0.80594	0.87503	1.37479	1.28027	2.20833	2.69326
CFAH_HUMAN	KGEWVALNPLR	1.05	-0.347	-1.69	0.10123	2.86	0.10123	1.57084	1.42871	1.04319	NA	0.31918	0.07041	0.83818	1.03469	NA	NA	NA	NA	NA	0.82191	0.81	0.77086	0.6813	0.51582	0.962835	0.87572	0.958305	0.972905	0.45364	0.73894	1.4125	1.41597	1.7535	1.32073	NA	NA	1.69464	1.46335	NA	0.528705	1.1635	NA	NA	0.98083	1.88554	1.95059
CFAH_HUMAN	CNMGYEYSER	-1.63	-0.016	-0.05	0.96387	0	0.96387	NA	-1.93429	NA	NA	NA	NA	-1.77695	NA	NA	-2.43992	NA	NA	NA	NA	NA	-1.60064	-1.16747	NA	NA	-1.00227	NA	-1.71717	NA	NA	NA	NA	NA	-1.2589	NA	NA	-1.77581	-1.17481	NA	-2.06853	NA	NA	NA	NA	NA	-1.68502
CFAH_HUMAN	SCDIPVFMNAR	1.8	-0.08	-0.48	0.63481	0.23	0.63481	1.8593	2.08028	1.5348	1.4592	1.35881	1.34304	1.4547	1.77242	1.6665	1.47695	1.7286	1.92198	1.63548	1.69279	1.68874	1.86749	2.05816	2.25011	1.95922	2.44334	1.96378	1.88382	1.76671	2.09619	1.99711	2.11357	2.10874	2.2093	1.48592	1.52275	2.17865	2.00473	1.25427	1.41918	1.27365	1.30376	1.47887	1.70288	2.40778	2.67746
CFAH_HUMAN	SPDVINGSPISQK	1.78	0.06	0.31	0.76104	0.09	0.76104	1.59574	2.1281	1.13841	1.51445	1.85191	1.96375	1.78987	1.70396	1.61586	1.62984	1.58505	2.01591	1.58626	1.83959	1.81945	1.70089	2.18145	2.48185	1.82208	2.18138	1.54259	1.70781	1.77356	1.65482	2.03288	2.28375	1.52973	1.98981	1.37234	1.51721	1.8425	2.37126	1.16777	1.47263	1.19827	1.38546	1.8295	1.56036	2.17898	2.52861
CFAH_HUMAN	SSNLIILEEHLK	3.46	-0.12	-0.83	0.41183	0.69	0.41183	3.43259	3.64409	3.23442	3.13629	3.12808	3.16461	3.34632	3.47779	3.37281	3.02351	3.53591	3.60414	3.39076	3.2871	3.38405	3.31554	3.47245	3.5894	3.60081	3.8498	3.51869	3.53129	3.30786	3.60797	3.57265	3.67221	3.88418	3.60338	3.19024	3.17569	3.92387	3.76382	3.17678	3.05924	3.16085	3.2772	3.29676	3.27518	4.04761	4.3522
CFAH_HUMAN	KGEWVALNPLRK	1.09	0.001	0.01	0.99559	0	0.99559	1.79601	1.43581	1.00319	NA	0.80676	0.59951	1.74635	1.52496	0.74847	0.68376	1.0812	NA	1.14985	0.96968	1.05512	0.98142	1.13455	0.89183	1.19042	0.70125	0.827965	0.731205	0.98602	0.83972	1.66798	1.28493	NA	NA	0.89834	0.48772	1.81157	1.41376	0.64763	0.501245	NA	0.73909	0.752425	1.50729	1.91627	1.60417
CFAH_HUMAN	EGWIHTVCINGR	2.75	-0.188	-1.47	0.14904	2.16	0.14904	2.69707	2.70692	2.69336	2.70599	2.24129	1.97442	2.47006	2.6881	2.64919	2.49464	3.03588	2.90858	2.72407	2.62564	2.71537	2.83308	2.58705	2.44965	2.9556	3.00171	2.82707	2.77912	2.58897	2.74047	2.73722	2.71703	3.05999	3.03182	2.70436	2.6381	3.31257	3.19181	2.60465	2.48212	2.66661	2.61348	2.69981	2.80288	3.29683	3.42017
CFAH_HUMAN	CFEGFGIDGPAIAK	0.42	-0.066	-0.37	0.70963	0.14	0.70963	0.42413	0.59954	-0.22894	-0.15063	0.27803	0.3066	-0.00668	0.394445	0.44508	0.10359	0.48149	0.55574	0.31813	0.38089	0.34161	0.33202	0.67102	0.95106	0.668585	0.82481	0.443255	0.550415	0.03038	0.69945	0.69236	0.68206	0.65558	0.841595	0.06136	0.0651	1.01682	0.965295	-0.0412	0.135065	0.29568	0.12922	0.164985	-0.22099	0.90258	0.933465
CFAH_HUMAN	SIDVACHPGYALPK	3.91	-0.028	-0.19	0.84687	0.04	0.84687	4.03068	4.23924	3.66833	3.72679	3.56295	3.65486	3.94982	3.99021	3.71189	3.53975	4.00474	4.15021	3.85438	3.87323	3.74477	3.76601	3.97714	4.2348	3.99913	4.18	3.82475	3.90632	3.56628	3.8584	3.97035	4.10919	4.56246	4.4974	3.65059	3.35856	4.25808	4.26891	3.47647	3.54043	3.69569	3.37683	3.9348	3.93008	4.24268	4.39522
CFAH_HUMAN	WSSPPQCEGLPCK	1.16	-0.26	-1.1	0.28791	1.21	0.28791	NA	1.01938	NA	NA	0.83897	0.57943	NA	0.758895	NA	NA	NA	NA	NA	NA	NA	0.94112	1.40392	1.26952	NA	1.63867	1.00894	0.985365	NA	1.10513	NA	1.17514	NA	1.4445	NA	NA	NA	1.53411	NA	NA	NA	NA	NA	NA	NA	1.7292
CFAH_HUMAN	LGYVTADGETSGSITCGK	1.33	0.04	0.17	0.86803	0.03	0.86803	1.09917	1.16301	2.36998	2.5671	0.9291	0.98318	1.28749	1.14691	1.71442	1.56779	0.89773	1.40163	0.84446	0.72514	1.3099	0.65466	1.78923	2.11425	NA	1.19771	1.67575	1.97327	1.07855	1.37398	0.55309	0.78523	0.19204	0.064575	1.42191	1.39439	NA	NA	1.55863	1.68098	1.90905	1.93141	2.00006	1.44979	1.25186	1.27414
CFAH_HUMAN	SCDNPYIPNGDYSPLR	2.33	-0.017	-0.11	0.912	0.01	0.912	2.65235	2.65254	1.93272	2.07279	1.97374	2.02588	2.15442	2.42741	2.08914	1.90639	2.48315	2.62671	2.26457	2.40509	2.2477	2.33489	2.48578	2.6676	2.40171	2.71555	2.15287	2.30645	1.98991	2.37356	2.47381	2.52653	2.44911	2.7513	2.02933	2.00504	2.82294	2.79374	1.90911	1.9588	1.91423	2.12225	2.04101	2.28329	2.87354	3.09021
CFAH_HUMAN	AQTTVTCMENGWSPTPR	2.57	0.349	1.83	0.0752	3.33	0.0752	2.7942	2.8203	1.66044	1.92742	3.21599	3.14001	2.80624	3.12021	2.98046	2.82458	2.00033	2.15216	2.34588	2.22958	2.80842	2.68535	3.14044	3.25301	3.38924	3.57777	2.66176	2.84151	2.6553	3.08476	2.43382	2.70264	2.18053	2.45416	2.07669	2.03323	2.58057	2.62064	2.55053	2.61769	1.41595	1.4306	2.10087	2.0624	2.5679	2.81498
CFAH_HUMAN	EQVQSCGPPPELLNGNVK	1.1	0.014	0.06	0.95203	0	0.95203	0.91591	1.53925	0.50648	0.96178	1.0129	1.24329	0.83738	1.15427	1.18616	0.95217	0.75786	0.98924	0.78607	1.08617	1.04315	1.04577	1.34067	1.79845	1.22856	1.71716	0.766145	1.02131	1.81005	2.41546	1.06617	1.08736	1.33493	1.28272	0.6925	0.86154	1.08422	1.40061	0.41529	1.10041	0.19861	0.38186	0.789045	1.00099	1.25602	1.84949
CFAH_HUMAN	TDCLSLPSFENAIPMGEK	2.6	-0.017	-0.09	0.93245	0.01	0.93245	2.70794	3.13289	2.22774	2.72493	2.13937	2.19947	2.38187	2.54438	2.57389	2.4933	2.39257	2.82185	2.41572	2.50837	2.4511	2.62873	2.67415	2.51896	2.99817	3.27733	2.8237	2.69494	2.53532	2.63879	2.83721	2.8319	2.36339	3.11057	2.29132	2.45885	2.44075	2.79639	2.23739	2.43824	2.30546	2.22343	1.9625	2.30697	3.20303	3.65225
CFAH_HUMAN	DTSCVNPPTVQNAYIVSR	1.93	0.022	0.14	0.89144	0.02	0.89144	1.69932	1.84906	1.89844	2.13059	1.45365	1.53055	1.75552	1.98298	2.09884	2.03629	2.01846	2.36099	1.83342	2.12348	1.64296	2.07694	2.05777	2.22277	1.983	2.12916	1.99063	1.72707	1.49255	1.90817	1.83393	1.86213	1.84948	2.21285	1.73377	1.90291	2.41535	2.56399	1.5203	1.80858	1.76991	1.81859	1.75713	1.88464	2.01879	2.36491
CFAH_HUMAN	EEYGHSEVVEYYCNPR	0.74	-0.152	-0.36	0.71946	0.13	0.71946	3.54542	2.52963	-0.14422	-0.19247	0.31498	-0.02444	1.0109	1.22569	0.35475	-0.16043	0.12898	0.49411	0.77649	-0.13947	-0.22783	-0.04816	1.16551	0.78999	1.13539	0.83808	1.94775	1.28103	-0.30635	0.39106	1.8824	1.27921	0.4084	0.655385	0.30704	-0.44511	0.88746	0.525105	0.82714	0.092785	0.03094	-0.29181	-0.261185	0.90479	3.24492	3.06063
CFAH_HUMAN	IEGDEEMHCSDDGFWSK	2.43	-0.019	-0.13	0.89974	0.02	0.89974	2.74496	2.71847	2.08137	2.41819	2.05487	2.05713	2.61312	2.64104	2.23629	1.92374	2.42301	2.64554	2.12599	2.24872	2.48876	2.46122	2.55865	2.38903	2.67536	2.94374	2.35805	2.29103	2.45259	2.62858	2.73981	2.44262	2.72056	2.90721	2.24982	2.09915	2.70531	2.81508	2.03929	2.09482	1.82311	1.86534	2.20248	2.48055	2.92452	2.99828
CFAH_HUMAN	ECDTDGWTNDIPICEVVK	2.68	0.037	0.2	0.84176	0.04	0.84176	3.1823	3.32145	2.14192	2.709	2.55366	2.5423	2.50794	2.91734	2.25054	2.41202	2.90713	3.06606	2.45119	2.39798	2.70984	2.79651	2.94623	2.69628	2.61704	2.92709	2.7963	2.36181	2.29421	2.4719	2.89736	2.63502	2.68309	3.07421	2.3238	2.63078	2.78362	2.86346	2.49918	2.70899	2.29053	2.16244	2.36701	2.77879	3.30163	3.39509
CFAH_HUMAN	AVYTCNEGYQLLGEINYR	1.26	0.011	0.06	0.95397	0	0.95397	1.74051	1.78415	0.86301	1.17137	1.32745	1.49476	1.22239	1.54883	1.01702	0.89117	1.37701	1.53984	1.09631	0.92867	1.36633	1.35467	1.07631	0.81969	1.40082	1.35207	1.30083	1.43867	1.20219	1.1018	0.99228	0.65381	1.24676	1.80766	0.87164	1.20961	1.83013	1.35998	0.94265	1.32607	0.87331	0.89965	1.03544	1.18765	2.19618	1.67775
CFAH_HUMAN	GDAVCTESGWRPLPSCEEK	3.2	0.048	0.26	0.79888	0.07	0.79888	3.48374	3.60853	2.41849	3.07738	2.88267	3.02258	3.5287	3.51293	3.08321	2.78364	3.22948	3.57688	2.89973	3.13621	3.25321	3.10741	3.45289	3.5662	3.16053	3.59554	2.87649	3.13095	2.94953	3.30222	3.19464	3.47664	3.22765	3.57172	2.69373	2.68954	3.5803	3.72886	2.66044	2.86865	2.85175	2.73349	3.13868	3.18731	3.69571	3.86544
CFAH_HUMAN	KCYFPYLENGYNQNYGR	-1.06	-0.155	-0.36	0.71892	0.13	0.71892	NA	NA	-0.69557	-0.24242	-3.28604	NA	-1.80462	-1.34737	-0.65865	-0.82497	-1.47551	-1.64803	-2.08754	-2.15069	-0.07475	0.04842	NA	NA	-0.088355	0.16358	-2.04036	-2.22976	-0.18816	0.07752	-0.34478	-0.45849	NA	NA	-1.97479	-2.00457	NA	NA	NA	NA	-1.88137	-1.87894	NA	NA	0.21784	0.250835
CFAH_HUMAN	IVSSAMEPDREYHFGQAVR	3.07	-0.086	-0.62	0.54088	0.38	0.54088	3.58225	3.4347	2.75611	3.0727	2.5966	2.51369	3.27841	3.34583	2.6851	2.61823	3.1669	3.27909	2.80306	2.76372	2.94248	2.85779	3.21178	3.20725	3.11539	3.24305	3.05396	3.04361	2.84276	3.11015	3.3601	3.26825	3.43534	3.63863	2.80488	2.75877	3.36954	3.28469	2.69757	2.66707	2.98529	2.77037	3.04941	2.95149	3.50256	3.60502
CFAH_HUMAN	TKEEYGHSEVVEYYCNPR	0.7	0.189	0.54	0.5938	0.29	0.5938	1.54215	1.1204	NA	-0.69869	1.06514	NA	1.30578	1.47647	0.05965	NA	0.68209	0.96109	0.25399	0.47543	0.2157	0.96236	1.06595	0.90916	0.795715	1.50487	1.35844	NA	0.73244	NA	1.20368	0.98842	0.99471	1.59127	-0.40701	-0.90886	1.17953	NA	-0.26347	NA	-0.05078	-0.0586	-1.16562	NA	2.0608	1.40711
CFAH_HUMAN	SITCIHGVWTQLPQCVAIDK	3.84	-0.171	-1.09	0.28398	1.18	0.28398	3.90807	4.0861	3.62784	3.87882	3.27817	3.19422	3.6639	4.02003	3.90881	3.50796	4.04144	4.03845	3.76638	3.80432	3.75896	3.85247	3.24565	3.29592	3.90621	4.26892	3.86197	3.96974	3.61412	3.90457	3.9388	3.98991	4.04336	4.33617	3.61372	3.58448	4.21975	3.98233	3.54258	3.73819	3.81829	3.90828	3.59969	3.66805	4.55471	4.57738
CFAH_HUMAN	VSVLCQENYLIQEGEEITCK	3.43	-0.129	-0.72	0.47858	0.51	0.47858	3.15287	3.85793	3.03055	3.26716	3.04637	3.26701	3.25022	3.20286	3.32517	3.43994	3.62479	3.67438	3.40219	3.63021	3.52013	3.60143	3.23744	2.95307	3.29553	3.43468	3.33879	3.23774	3.24498	3.34799	3.66264	3.74664	3.44199	3.8785	3.34406	3.46823	3.47414	3.86721	3.32888	3.32137	3.36945	2.98177	3.09049	3.31528	3.9283	4.41214
CFAH_HUMAN	NTEILTGSWSDQTYPEGTQAIYK	1.61	-0.124	-0.65	0.51993	0.42	0.51993	1.79968	1.94651	1.15821	1.42676	1.14754	1.05638	1.57676	2.10703	1.49574	1.0213	1.86841	1.93814	1.74008	1.63382	1.6791	1.85063	1.15092	0.95655	1.51872	1.95163	1.44518	1.65589	1.3569	1.87486	1.85199	1.78631	1.84811	2.21081	1.20284	1.30835	2.19349	1.98792	1.28812	1.4728	1.18566	1.39261	1.37678	1.66415	2.26375	2.12932
CFAH_HUMAN	RNTEILTGSWSDQTYPEGTQAIYK	-1.18	-0.18	-0.64	0.52888	0.41	0.52888	-0.89119	-0.97887	NA	-1.57705	-2.26788	NA	-1.11053	-0.864935	NA	NA	NA	-0.7946	NA	-1.32984	-1.31075	-1.08974	NA	-2.26323	-1.45452	-0.84881	-1.63165	-1.30164	-2.05366	NA	-0.97324	-1.01922	-0.75869	-0.405165	NA	-2.09593	-0.59834	-0.539005	NA	NA	NA	NA	NA	-1.5551	-0.6309	-0.252605
CFAH_HUMAN	SPPEISHGVVAHMSDSYQYGEEVTYK	-0.01	-0.203	-0.76	0.45264	0.57	0.45264	-0.66259	-0.65122	0.12575	0.2654	-1.03124	-0.24392	0.58843	0.285205	0.19654	-0.05409	0.43356	0.60733	-1.57671	-1.38494	-0.78985	-1.35278	0.62185	0.47795	1.02892	0.81683	0.511805	0.399225	-0.32778	-0.44501	-0.50274	-0.79413	-0.23787	-0.563325	0.06578	-0.17405	0.47614	0.538405	-0.05411	-0.090745	0.1655	-0.02759	0.327465	-0.15518	1.42424	1.21466
CFAH_HUMAN	RPCGHPGDTPFGTFTLTGGNVFEYGVK	1.66	-0.164	-0.83	0.41403	0.68	0.41403	2.05975	1.79564	1.15263	1.19531	1.78152	NA	2.13236	1.92077	0.81582	0.97529	1.86895	1.6314	1.39558	0.90459	1.99945	1.6774	1.34368	NA	2.03009	1.86698	1.53598	NA	1.92372	NA	NA	1.9015	2.29667	2.157	1.28206	1.17018	1.778	1.68737	1.75907	1.63938	1.38768	1.25348	1.856	1.25062	2.55576	2.18784
CFAH_HUMAN	FSCKPGFTIVGPNSVQCYHFGLSPDLPICK	1.5	-0.495	-1.74	0.08854	3.04	0.08854	1.401	1.66166	1.6687	1.65977	0.52586	0.54457	1.06704	1.40037	1.53101	1.4854	1.83545	1.88673	1.53294	1.3914	1.63809	1.82705	-0.06357	-1.52832	1.58346	1.94871	1.58944	1.49907	1.417	1.64219	1.55925	1.39937	2.03835	2.32778	1.64029	1.75244	1.82757	2.00588	1.40379	1.40324	1.80498	1.64948	1.27507	1.78126	2.23204	2.652
CFAI_HUMAN	KDCELPR	-4.34	NA	NA	NA	NA	NA	NA	NA	NA	NA	NA	NA	NA	NA	NA	NA	NA	NA	NA	NA	NA	NA	NA	NA	NA	NA	NA	NA	NA	-5.66506	NA	NA	-3.35147	-3.99978	NA	NA	NA	NA	NA	NA	NA	NA	NA	NA	NA	NA
CFAI_HUMAN	IVIEYVDR	0.65	-0.23	-1.32	0.19539	1.74	0.19539	0.42337	0.41518	-0.38776	-0.30151	0.40712	0.38562	0.44451	0.410415	NA	NA	0.73956	0.96681	NA	0.63814	0.33477	0.24298	0.87291	1.18491	0.927815	0.94743	1.01553	1.09719	0.88142	1.08473	0.84337	0.93149	1.37864	1.29381	0.61467	0.48845	NA	1.10715	NA	0.170535	0.22014	0.22215	NA	0.17299	0.93302	0.853625
CFAI_HUMAN	VFCQPWQR	-0.57	-0.664	-0.68	0.50282	0.46	0.50282	-1.91173	-0.22083	-1.7525	-1.12784	-2.95242	-0.50663	-0.30502	-0.261045	-1.117	-1.25538	0.29926	0.51666	-2.79514	-2.55192	-0.10054	-0.06106	-2.9458	0.13021	0.226955	0.56041	-4.93701	0.606425	0.01798	0.55711	0.34197	0.41913	0.52887	0.612465	0.27587	-4.00724	0.76073	0.701035	-0.2851	-0.015315	-0.27068	-0.71843	-0.338355	0.13658	0.40804	0.351275
CFAI_HUMAN	SLECLHPGTK	-0.68	-0.36	-0.49	0.65034	0.24	0.65034	NA	-0.92376	NA	NA	NA	NA	NA	NA	NA	NA	NA	NA	NA	NA	NA	NA	NA	NA	NA	NA	NA	NA	NA	NA	-0.32566	NA	NA	NA	NA	NA	NA	NA	NA	NA	NA	NA	NA	NA	-0.80128	NA
CFAI_HUMAN	HGNTDSEGIVEVK	0.45	0.186	0.53	0.60048	0.28	0.60048	NA	NA	NA	NA	NA	NA	NA	NA	-0.18681	NA	0.38606	1.00881	0.0824	0.35703	NA	NA	0.54876	0.7876	0.631235	0.82166	NA	NA	NA	NA	NA	0.501	1.05037	1.53085	NA	NA	0.50561	0.855575	-0.56075	NA	-0.16092	NA	0.042265	NA	-0.18423	NA
CFAI_HUMAN	AQLGDLPWQVAIK	1.13	-0.27	-1.62	0.11315	2.63	0.11315	0.97471	1.00271	0.27556	0.40029	NA	NA	0.70864	1.02599	0.53817	0.46263	1.62663	1.79079	1.23271	1.0914	NA	0.96589	1.09011	1.20034	1.142	1.20551	1.23547	1.30777	1.19313	1.50515	1.40587	1.14136	1.83802	1.99802	1.20552	1.23626	1.54553	1.56449	0.73286	0.811085	1.01335	0.80716	0.777285	0.91078	1.32765	1.50738
CFAI_HUMAN	RAQLGDLPWQVAIK	-1.12	-0.599	-1.78	0.08237	3.17	0.08237	NA	-1.29407	-4.55461	-3.98659	-1.28278	-1.78371	-0.98154	-0.704095	-1.66667	-2.2519	-0.23751	-0.3788	-0.6455	-1.05881	-1.41525	-1.20108	-0.70807	-1.10956	-0.913445	-0.94371	-0.574075	-0.580075	-0.55541	-0.22263	-0.63811	-0.60678	0.20645	0.177895	-1.26662	-1.53149	0.14918	-0.075905	-1.48872	-1.72179	-1.70209	-1.65722	-1.83581	-1.12974	-0.45144	-0.945025
CFAI_HUMAN	ADSPMDDFFQCVNGK	-0.36	-0.368	-1.45	0.15427	2.11	0.15427	-0.06782	-0.47301	-1.56223	-1.36001	-0.92717	-1.3089	-0.66767	-0.341005	-1.14548	-1.50319	-0.09167	0.06045	-0.57029	-0.41778	-0.8488	-0.66244	0.10429	0.40077	0.140865	0.37468	0.065805	0.211055	-0.18605	0.15021	0.041	0.25747	0.45128	0.919275	-0.44112	-0.27235	0.41774	0.379485	-1.40934	-0.941255	-1.06277	-0.65918	-1.16631	-0.63084	0.19281	0.167455
CFAI_HUMAN	EMECAGTYDGSIDACK	-1.4	0.505	0.6	0.55991	0.36	0.55991	0.18172	-0.20443	NA	NA	NA	NA	NA	NA	NA	NA	NA	NA	NA	NA	NA	NA	-1.94986	-1.74078	-1.53537	-1.48255	-1.78838	-2.6217	-2.20319	-3.8993	NA	-1.49964	-1.8849	NA	NA	NA	NA	NA	NA	NA	NA	NA	NA	NA	0.68809	0.300025
CFAI_HUMAN	TMGYQDFADVVCYTQK	-0.77	-0.179	-0.51	0.61517	0.26	0.61517	NA	NA	NA	NA	NA	NA	NA	NA	NA	NA	-0.9276	-0.97881	-1.24885	NA	-1.49242	NA	-0.69858	NA	-0.611955	NA	-0.476575	NA	-0.46122	-0.78416	-0.6952	-1.05602	0.37472	0.272495	NA	-1.53743	0.26288	0.018875	NA	NA	NA	-2.06637	NA	-1.6224	-0.87115	NA
CFAI_HUMAN	YQIWTTVVDWIHPDLK	-0.24	-0.451	-1.56	0.12761	2.43	0.12761	-1.02335	-1.2474	-0.12046	-0.29505	NA	NA	-1.05126	-0.588015	-0.84812	-1.23961	0.74858	0.9614	0.10671	-0.28164	-0.3426	-0.07318	NA	NA	-1.47745	-1.00012	-0.183365	-0.331265	-0.17702	-0.15292	-0.61217	-0.81805	1.24943	1.43927	0.17288	0.28705	0.72626	0.477445	-0.9475	-1.01161	-0.31953	-0.58611	-0.114985	0.45334	-0.43657	0.181945
CFAI_HUMAN	YQIWTTVVDWIHPDLKR	-2.26	0.138	0.15	0.8861	0.02	0.8861	NA	NA	NA	NA	NA	NA	NA	NA	NA	NA	NA	-0.9256	-1.1713	NA	-4.03092	NA	NA	NA	NA	NA	-3.07466	-4.11128	-3.04159	-3.18608	NA	-3.85205	0.08826	NA	NA	NA	NA	-1.11435	NA	NA	-1.11139	-1.59384	NA	NA	NA	NA
CFAI_HUMAN	VANYFDWISYHVGRPFISQYNV	-1.52	0.048	0.06	0.95161	0	0.95161	NA	NA	-1.89348	-1.85678	NA	NA	NA	NA	NA	NA	-1.13635	-0.50045	-1.24771	-2.2224	NA	-1.61048	NA	NA	NA	NA	NA	NA	-3.28189	-2.38507	NA	NA	0.01555	0.713895	-1.30544	-1.44431	-1.30286	-0.719545	NA	NA	-1.9829	-2.54567	-3.06028	-0.66625	NA	-1.93674
CFAI_HUMAN	DASGITCGGIYIGGCWILTAAHCLR	-3.12	-1.039	-1.11	0.34097	1.22	0.34097	NA	NA	NA	NA	NA	NA	NA	NA	NA	NA	-3.63648	NA	NA	NA	NA	NA	NA	NA	NA	NA	NA	NA	NA	NA	NA	NA	-2.59754	NA	NA	NA	NA	NA	NA	NA	NA	NA	NA	NA	NA	NA
CGRE1_HUMAN	HVEPGEPLAPSPQEPQAVGR	-1.87	0.011	0.03	0.97326	0	0.97326	NA	NA	-1.30242	-0.45936	-3.06484	NA	-1.53512	-1.92412	-1.45841	NA	-2.61868	-2.1636	-1.72783	-1.39151	-2.28317	-2.42257	-1.665	-1.63233	NA	-2.57448	NA	-2.37825	NA	NA	NA	-2.58375	NA	NA	-1.64707	-1.62364	NA	NA	-1.81376	-1.45718	-2.00814	NA	-1.73744	-1.50489	NA	NA
CGRE1_HUMAN	RESLDPVQEPGGQAEADGDVPGPR	-1.14	NA	NA	NA	NA	NA	NA	NA	NA	-1.14178	NA	NA	NA	NA	NA	NA	NA	NA	NA	NA	NA	NA	NA	NA	NA	NA	NA	NA	NA	NA	NA	NA	NA	NA	NA	NA	NA	NA	NA	NA	NA	NA	NA	NA	NA	NA
CGRE1_HUMAN	VLETQDLNGDGLMTPAELINFPGVALR	-2.39	0.557	0.98	0.33532	0.95	0.33532	-3.04323	-3.17535	0.07909	0.15222	-5.5474	NA	-3.3508	-2.58674	-1.6264	-2.37797	-1.59912	-1.67013	-1.41674	-1.51751	-1.855	-1.41389	NA	NA	-2.65305	-2.55561	-4.38516	-3.85229	NA	-4.15739	NA	-4.73167	-3.65978	-2.79637	-1.46671	-0.96478	NA	NA	-0.93521	-0.914815	-2.13133	-2.31926	-4.28475	-2.52611	-1.91123	-1.79259
CH3L1_HUMAN	FPLTNAIK	2.1	-0.017	-0.09	0.92702	0.01	0.92702	2.74928	2.72187	2.22701	2.14014	2.28593	2.24157	1.34686	1.38545	2.07747	2.03908	2.33341	2.30194	1.69856	1.83999	1.65082	1.55582	2.7441	3.01645	1.52384	1.88095	2.68038	2.82113	1.50205	1.79786	2.25041	2.30416	1.60081	1.51757	2.75872	2.71039	1.663	1.74521	2.85918	2.84508	1.49104	1.45237	2.3431	2.45344	1.60235	1.70863
CH3L1_HUMAN	LVMGIPTFGR	2.58	-0.014	-0.07	0.94511	0	0.94511	3.37841	3.24472	2.68699	2.72939	2.70486	2.52981	1.7582	1.95896	2.42441	2.43862	2.95515	2.87591	2.46771	2.38626	2.16697	2.30587	3.1213	3.15002	1.88112	2.33086	3.2332	3.26207	1.95942	2.34116	2.86453	2.79376	1.84421	1.97934	3.1862	3.24176	2.25232	2.20465	3.50843	3.4548	2.1616	1.88294	2.59129	2.79682	1.99537	2.21466
CH3L1_HUMAN	QLLLSAALSAGK	0.33	0.083	0.16	0.87955	0.02	0.87955	NA	0.78349	NA	NA	0.45292	NA	NA	NA	NA	NA	NA	NA	NA	NA	NA	NA	-0.11797	NA	NA	NA	NA	0.616835	NA	NA	NA	NA	NA	NA	NA	NA	NA	NA	NA	0.840075	NA	NA	NA	NA	NA	-0.586955
CH3L1_HUMAN	GTTGHHSPLFR	-1.28	-0.053	-0.16	0.87391	0.03	0.87391	-0.48431	-0.8535	NA	NA	-1.74825	NA	-1.09865	-1.54703	NA	NA	-1.06186	-0.41533	-1.55665	-1.52061	-2.10268	-1.85946	-0.80345	-1.2613	NA	-1.97188	-0.731075	-0.711095	NA	-2.04366	NA	NA	-1.99244	-1.30012	NA	NA	-2.1834	-1.69954	-0.41785	-0.150375	-1.55128	NA	-1.23595	-0.92538	NA	NA
CH3L1_HUMAN	ILGQQVPYATK	1.66	-0.001	-0.01	0.99575	0	0.99575	2.19086	2.29688	1.55671	1.68881	1.62505	1.72694	0.96824	1.19583	1.80225	1.59219	1.77412	2.08116	1.17845	1.47303	1.13596	1.08151	2.39871	2.71462	1.1484	1.52825	2.1196	2.37216	1.08385	1.54162	1.6989	1.79109	1.04036	1.16373	2.18598	2.23511	1.34457	1.35512	2.27493	2.50547	0.94775	0.95089	1.97371	1.90671	1.19021	1.49792
CH3L1_HUMAN	EGDGSCFPDALDR	1.09	0.343	1.46	0.15093	2.14	0.15093	2.04348	2.37704	0.69802	1.09723	1.73783	1.84435	0.64598	0.881085	1.34743	1.1661	0.95693	1.18649	0.61405	0.95111	0.82765	0.7949	1.98924	2.44615	0.630385	1.0406	1.41304	1.66439	0.76293	1.24481	0.80519	1.04618	0.02819	0.153975	1.20997	1.25592	0.51161	0.658285	1.78636	1.95301	-0.02381	0.12909	1.20303	1.11529	0.57881	0.913365
CH3L1_HUMAN	TLLSVGGWNFGSQR	1.83	-0.167	-0.88	0.38559	0.77	0.38559	2.45651	2.48426	1.88385	2.18497	1.77291	1.66275	1.18215	1.24368	1.85545	1.87691	2.33173	2.42106	1.61609	1.6629	1.53433	1.74784	1.29228	1.17314	1.18311	1.37594	2.23323	2.28606	1.2525	1.30586	2.00585	2.05141	1.36871	1.79124	2.40978	2.51641	1.46952	1.58901	2.61596	2.82781	1.94428	1.32344	2.04969	2.19071	1.5598	1.49067
CH3L1_HUMAN	FSNTDYAVGYMLR	0.99	-0.042	-0.2	0.84278	0.04	0.84278	1.86757	1.7504	0.71852	0.65461	0.91168	0.72517	0.22361	0.490025	1.16581	0.7703	1.31218	1.55841	0.73103	0.70695	0.69906	0.48885	1.40674	1.35257	NA	NA	1.72653	1.83634	0.54937	0.66232	1.23947	NA	0.40675	0.485515	1.60961	1.69406	0.85949	0.762085	1.92794	1.96659	0.065	0.06164	0.884205	1.17292	0.59643	0.615195
CH3L1_HUMAN	GNQWVGYDDQESVK	1.15	0.092	0.5	0.61878	0.25	0.61878	1.83183	1.87861	0.96392	1.26711	1.19995	1.13293	0.71903	0.954275	1.17749	0.99013	1.34014	1.67861	0.69012	0.7091	0.77023	0.71501	1.90777	2.04169	0.865125	1.14748	1.5516	1.63265	0.74951	1.09833	1.12531	0.9623	0.66881	0.883115	1.40793	1.46448	0.96444	0.967615	1.80203	1.99423	0.293	0.16926	1.34701	1.27479	0.7655	1.00964
CH3L1_HUMAN	LVCYYTSWSQYR	-1.26	NA	NA	NA	NA	NA	NA	NA	NA	NA	NA	NA	NA	NA	NA	NA	NA	NA	NA	NA	NA	NA	NA	NA	NA	NA	-1.42854	NA	NA	NA	-1.18331	-1.51498	NA	NA	NA	-1.02714	NA	NA	-1.40707	-1.02767	NA	NA	NA	NA	NA	NA
CH3L1_HUMAN	THGFDGLDLAWLYPGR	2.13	-0.49	-1.27	0.21253	1.6	0.21253	2.6435	2.50455	2.95309	2.95638	1.76049	1.32968	1.64577	1.74232	2.59004	2.52952	3.21036	3.20978	2.59868	2.23134	1.94208	2.28493	-1.18222	-2.50343	1.65847	1.62638	2.50414	1.89633	1.73765	1.83727	1.86278	1.86883	2.53977	2.69256	2.90609	2.83701	2.28	2.05999	3.33122	3.17636	2.57042	2.1773	2.64486	3.1476	1.45939	1.99812
CH3L1_HUMAN	EAGTLAYYEICDFLR	3.35	-0.397	-1.25	0.21936	1.56	0.21936	2.67245	3.46144	4.37109	4.33748	2.71457	2.48997	2.53476	2.74619	3.76043	3.6721	3.95498	3.99232	3.20005	3.90562	3.18678	3.52217	1.46021	0.64353	3.116	3.2349	3.07865	3.11585	2.97958	3.18777	2.85801	3.1797	3.48085	3.74234	4.31524	4.22731	3.02502	3.42177	4.18153	4.45364	3.71227	3.40305	3.40351	4.26484	3.09334	3.78703
CH3L1_HUMAN	SFTLASSETGVGAPISGPGIPGR	3.21	0.149	0.75	0.45628	0.57	0.45628	3.80628	3.91338	3.00708	3.53369	3.14834	3.31561	2.60771	2.80877	3.49732	3.3625	3.68725	3.69554	3.04965	3.12584	2.738	2.97925	3.74682	3.78777	2.76127	3.10236	3.71863	3.60799	2.41865	2.74202	3.27702	3.38987	2.39865	2.61535	3.59858	3.65462	2.8201	2.9284	3.95542	4.28775	2.70669	2.56507	3.31168	3.47443	2.65289	2.58026
CH3L1_HUMAN	ISQHLDFISIMTYDFHGAWR	-3.47	0.661	0.92	0.36852	0.84	0.36852	-2.72912	NA	-1.97239	-2.98665	NA	-3.19356	NA	NA	-3.33803	-3.59299	-2.02338	-3.59928	-4.04083	NA	-2.93099	-5.22539	NA	NA	NA	NA	-3.96894	NA	-3.8042	NA	NA	NA	NA	-5.04225	-2.6293	-2.95578	NA	NA	-3.29208	-4.35658	-5.22279	NA	-2.3522	-3.56871	NA	NA
CH3L1_HUMAN	GQEDASPDRFSNTDYAVGYMLR	-1.46	-0.235	-0.79	0.43606	0.62	0.43606	NA	-0.77484	NA	-0.79269	NA	-1.88623	-2.50091	-1.59989	-1.54804	NA	-1.25755	-0.95068	-1.94521	-2.02491	-2.35675	-2.54179	-1.0276	NA	NA	-1.69715	-0.920465	-1.03104	NA	NA	-1.01256	NA	-2.35924	-1.64192	-0.66847	-0.71427	NA	-1.9084	-0.90755	-0.603885	-1.73862	-2.14829	-1.36922	-1.07202	NA	NA
CHD7_HUMAN	NLLVYGWGR	-4.91	0.308	0.36	0.72929	0.13	0.72929	NA	NA	NA	-4.91751	NA	NA	-4.26798	NA	-4.1858	NA	NA	-6.0405	NA	NA	NA	NA	NA	NA	NA	NA	NA	NA	NA	NA	NA	NA	NA	NA	NA	-5.16049	NA	NA	NA	NA	NA	NA	NA	NA	NA	NA
CHL1_HUMAN	EVNILR	-1.33	0.139	0.24	0.81534	0.06	0.81534	-1.67971	-1.23556	0.01998	-0.39275	-0.40059	-2.59757	-1.66886	-1.04368	-0.45177	-0.95047	-1.62753	-0.73891	-1.05896	-1.3663	-1.37648	-1.39064	-1.06333	-1.65372	-2.0282	-2.27246	-1.0432	-1.55438	-0.84985	-4.02273	-1.44808	-1.19512	-3.70578	-1.4672	-0.74113	-0.52523	-2.74078	-2.18059	-0.88127	-0.490565	-0.23917	-0.31847	NA	-0.85144	-1.25208	-1.30733
CHL1_HUMAN	VTWSTVPK	1.4	0.162	0.65	0.51837	0.42	0.51837	1.13902	0.92555	2.58231	2.42515	1.02356	0.98055	1.51425	0.963045	1.66263	1.63937	1.1651	1.17105	1.50443	1.38545	1.51726	1.60752	2.11483	1.77194	1.18843	1.28956	1.49021	0.911095	1.22633	0.8011	1.29311	1.20258	0.06583	-0.279935	2.11731	1.90424	0.43769	0.589665	1.99185	2.02131	2.28634	2.18075	1.93681	1.91497	1.46282	0.774415
CHL1_HUMAN	VIAVNEVGR	1.9	0.055	0.28	0.77941	0.08	0.77941	1.46086	1.71073	2.792	2.81867	1.45581	1.46896	1.89374	1.54649	2.12885	2.20349	1.60286	1.71743	1.9205	1.87032	1.85448	1.72076	2.35007	2.42326	1.62838	1.49464	1.91237	1.63935	1.5849	1.30805	1.60216	1.6077	NA	0.902325	2.40811	2.42955	0.97331	1.38077	2.42199	2.42084	2.70919	2.55789	2.43897	2.21705	1.72656	1.65034
CHL1_HUMAN	TAVTANLDIR	-0.09	0.113	0.32	0.7527	0.1	0.7527	NA	-0.28764	-0.08482	-0.25987	NA	NA	NA	NA	0.31067	NA	-0.72173	NA	NA	NA	NA	-0.29662	NA	1.0263	NA	NA	-0.506515	-0.181915	NA	NA	NA	NA	-1.57802	NA	0.39761	NA	NA	NA	0.72026	NA	0.2896	0.2535	-0.340875	NA	NA	-0.116995
CHL1_HUMAN	GYQINWWK	-0.13	-0.342	-1.06	0.29962	1.12	0.29962	-0.2527	-0.52939	NA	1.03177	-0.99631	-1.73274	-0.13648	0.000185	NA	-0.14036	NA	NA	NA	-0.33697	0.48718	0.39907	-0.65506	-1.24037	NA	NA	-0.192495	-0.353465	NA	-0.59646	-0.3771	-0.62625	NA	NA	0.46607	0.53664	NA	NA	NA	0.663275	NA	0.96102	0.323125	0.7521	-0.24855	-0.501995
CHL1_HUMAN	IENVSYQDK	2.61	0.448	1.87	0.06892	3.49	0.06892	3.19311	3.3461	1.44096	1.64965	3.76886	3.78093	3.10775	3.1934	2.61879	2.20397	1.79216	2.20997	2.41365	2.53767	2.94573	2.75979	3.74464	3.99174	2.78673	3.10316	2.45097	2.68269	3.09186	3.39072	2.76363	2.85119	1.67159	1.82149	1.78635	1.77024	2.12141	2.32795	2.47405	2.50126	1.50487	1.57316	2.48645	2.17748	2.96958	3.21437
CHL1_HUMAN	VEEVKPLEGR	0.6	-0.083	-0.4	0.69001	0.16	0.69001	0.08834	0.59018	1.39656	1.32197	-0.10751	NA	0.55666	0.524645	0.73094	0.71944	0.03293	0.55807	0.48705	0.48394	0.45216	0.57643	0.9564	0.96588	0.249975	0.21278	0.541005	0.686455	0.07719	0.23841	NA	NA	-0.44372	-0.284955	0.95444	0.97783	NA	NA	0.908	1.01821	1.4346	1.35462	0.766315	0.86377	NA	0.421165
CHL1_HUMAN	GNPEPTFSWTK	1.93	0.137	0.65	0.51764	0.43	0.51764	2.11592	2.13218	2.55534	2.95162	1.59697	1.44058	1.80417	2.13523	2.33045	1.99692	1.38768	1.75169	1.67103	1.78189	1.88063	2.11876	2.39233	2.42868	1.4864	2.05674	2.02699	2.16936	1.64701	2.0216	1.70409	1.72061	0.58397	0.790475	2.24987	2.24467	0.9834	1.16833	2.14735	2.42104	2.56588	2.52498	2.14132	2.2646	1.83619	2.06359
CHL1_HUMAN	GDLYFANVEEK	2.3	0.128	0.65	0.5192	0.42	0.5192	2.37662	2.44952	2.87173	3.16904	1.69698	1.88799	2.01536	2.26553	2.79118	2.56741	1.81936	2.04793	2.14026	2.36576	2.29758	2.2922	2.71114	3.0814	2.01894	2.36177	2.43492	2.59287	1.80541	2.27836	2.05525	2.06162	1.0522	1.28127	2.55156	2.65742	1.58037	1.77536	2.52678	2.81101	2.86573	2.79648	2.55022	2.55947	2.0808	2.34334
CHL1_HUMAN	TTVILPLAPFVR	1.96	-0.006	-0.03	0.9731	0	0.9731	1.99878	2.15986	2.94825	2.90862	1.33482	1.3815	1.65238	1.88024	2.24981	2.15414	1.72371	1.86875	1.92204	1.92062	1.88851	1.88281	2.04484	2.15514	1.45748	1.68137	2.18653	2.23299	1.36887	1.73055	1.86368	1.9437	1.05371	1.18999	2.47949	2.38994	1.23589	1.10414	2.54457	2.47404	2.79903	2.60435	1.99754	2.28752	1.73839	2.11617
CHL1_HUMAN	DGNPFYFTDHR	2.34	0.089	0.48	0.63215	0.23	0.63215	2.36056	2.26318	3.23193	3.26302	1.79889	1.66698	2.2157	2.53652	2.63383	2.47006	2.09302	2.2002	2.25465	2.3072	2.29947	2.39428	2.67069	2.77418	2.07456	2.16353	2.3985	2.44062	1.7809	2.21931	2.00118	1.95719	1.23738	1.41335	2.83525	2.77619	1.64229	1.67948	2.77002	2.83034	3.17145	3.00763	2.74215	2.82104	2.01182	2.15299
CHL1_HUMAN	SMEQNGPGLEYR	-1.36	-0.145	-0.51	0.61144	0.26	0.61144	-2.24584	-2.03227	-0.1628	-0.07173	-2.03474	NA	-1.73148	-2.2643	-0.95974	-1.28274	NA	-1.91744	-1.93626	NA	-1.50029	-1.58408	-0.70049	-0.84588	NA	-1.55975	-1.48666	NA	NA	NA	NA	-1.92829	NA	NA	-0.53003	-0.57068	NA	NA	-1.13685	-0.637285	-1.51959	-1.28342	NA	-1.58887	NA	-1.76632
CHL1_HUMAN	LHMLELHCESK	-0.31	-0.681	-1.7	0.1054	2.88	0.1054	-0.72111	NA	NA	0.50089	-1.53223	NA	NA	-1.14169	-0.3174	-0.19527	NA	-1.35696	NA	NA	NA	-1.00251	-0.39886	NA	NA	NA	-0.046815	-0.956195	-1.17178	NA	-0.45718	NA	NA	NA	0.26197	0.08709	NA	NA	NA	0.195185	1.3747	1.30583	NA	NA	NA	NA
CHL1_HUMAN	NDYCCFAAFPR	0.93	-0.155	-0.73	0.46968	0.53	0.46968	0.92152	0.99558	1.66735	1.6374	0.64409	0.38675	0.55392	0.911155	1.12693	0.9065	0.37308	0.69418	0.92131	0.89603	0.67809	0.94702	0.95915	1.08804	0.278675	0.56308	1.05271	1.32814	0.4785	0.99231	0.67421	0.8007	0.00436	-0.083755	1.3791	1.44287	0.30471	0.180135	1.45064	1.52757	2.2297	2.1681	1.35584	1.6543	0.54415	0.758635
CHL1_HUMAN	VMTPAVYAPYDVK	2.91	0.155	0.37	0.71179	0.14	0.71179	2.92943	2.93661	4.03126	3.97972	2.25027	2.09445	2.68998	2.87455	3.12542	2.9441	2.71274	2.98085	2.87795	2.73569	2.8635	2.97216	3.30288	3.28205	2.78274	2.97876	3.09577	3.1563	2.57338	3.11417	2.79238	-0.29436	2.21255	2.24483	3.52429	3.45112	NA	2.06744	3.28695	3.30042	3.70124	3.59575	3.01395	3.38662	2.9168	2.90516
CHL1_HUMAN	KTTVILPLAPFVR	1.01	0.027	0.08	0.93694	0.01	0.93694	NA	0.14565	1.82685	1.84249	0.44989	0.28004	0.66248	1.00557	NA	NA	1.35623	NA	NA	NA	1.04267	1.3296	1.34785	1.24421	NA	NA	1.22327	NA	0.65706	0.52258	0.99276	0.47774	NA	NA	NA	NA	NA	NA	NA	NA	2.23448	1.98167	NA	NA	0.1041	0.444805
CHL1_HUMAN	IPNEGHISHFQGK	0.59	0.319	1.19	0.24385	1.41	0.24385	NA	NA	1.59377	1.4572	NA	NA	0.87951	0.967565	0.79019	0.64083	0.30241	0.7517	0.83182	0.26441	NA	0.51399	NA	0.76901	0.555055	-0.19915	0.542455	0.332045	NA	-0.16643	0.42106	-0.05846	0.46217	-0.205075	0.75961	0.73971	NA	-0.174395	0.86832	0.803965	1.43143	1.32371	NA	0.6833	NA	-0.230685
CHL1_HUMAN	VDKDTATLSWGLPK	1.54	0.036	0.16	0.8702	0.03	0.8702	1.48352	1.46648	2.48044	2.59339	0.80422	0.31878	1.56773	1.71761	1.82497	1.55893	1.41498	1.49039	1.43392	1.53523	1.41787	1.55495	2.00035	1.99113	1.09241	1.35412	1.51723	1.56842	1.13173	1.44684	1.23218	1.25988	0.78381	0.282055	2.1059	2.01872	0.66363	0.704825	2.04588	2.20417	2.49285	2.4999	1.87183	1.93805	1.16298	1.45837
CHL1_HUMAN	THPVEVFEPGAEHIVR	2.46	0.255	1.12	0.26852	1.26	0.26852	2.72761	2.58211	3.19837	3.54363	1.83111	1.82414	2.66827	2.83459	2.89626	2.76886	2.26003	2.26758	2.30058	2.38098	2.30022	2.31521	3.03493	3.09764	1.96093	2.21097	2.58183	2.67808	1.85263	2.20142	2.18444	2.07938	1.32427	1.35702	3.08038	2.99149	1.71759	1.60231	3.02801	2.99155	3.41494	3.25939	2.74019	2.86687	NA	0.845775
CHL1_HUMAN	LLLPPTESGSESSITILK	1.38	0.034	0.14	0.8908	0.02	0.8908	1.38795	1.49219	2.39564	2.49403	0.73286	0.75091	1.03204	1.39214	1.85712	1.82064	0.98887	1.20576	1.22577	1.33026	1.17735	1.40224	1.51381	1.77918	0.768295	1.10231	1.49009	1.61152	0.63916	1.24328	1.02745	1.2546	0.14568	0.373025	1.99983	2.21849	0.02506	0.310845	2.03734	2.17474	2.47172	2.40417	1.5195	1.64319	1.02843	1.55675
CHL1_HUMAN	VNGSPVDNHPFAGDVVFPR	0.11	0.294	0.31	0.75709	0.1	0.75709	-1.11145	0.34627	0.84519	1.0037	-0.50873	NA	-0.81205	NA	0.7961	0.59192	NA	-0.28176	NA	0.28012	-0.09258	0.12613	0.34546	0.73327	NA	2.19087	NA	2.59606	NA	NA	NA	NA	-3.01835	-1.37801	2.92399	-0.22522	NA	-0.773445	-0.71093	-0.413595	3.4236	-0.75868	-0.678475	NA	-1.50927	-0.793135
CHL1_HUMAN	TTEEDAGSYSCWVENAIGK	-0.59	-0.441	-0.87	0.39618	0.76	0.39618	NA	NA	NA	-1.06214	NA	NA	NA	-1.30364	-0.71599	NA	NA	NA	NA	NA	NA	NA	NA	NA	NA	NA	NA	-1.06852	NA	-1.65648	NA	NA	NA	NA	-1.20018	-0.81968	NA	NA	-0.59172	0.008265	0.8106	0.90819	-0.660425	-0.31111	NA	NA
CHL1_HUMAN	VQVAFPFDEYFQIECEAK	0.03	-0.321	-0.8	0.4272	0.64	0.4272	-0.25482	-0.11024	1.6388	1.82058	-1.29292	-1.1721	-0.34228	-0.322515	0.77939	0.65875	0.2381	-0.46638	0.26854	-0.38045	-0.0827	0.16102	-1.41155	NA	-0.540485	-1.28936	0.400705	-0.207705	-0.73506	-0.65922	-0.81052	-0.92844	-0.75663	-0.466415	1.15801	0.88095	-1.55452	-1.16037	1.4564	1.30086	2.09821	1.55067	0.483745	1.25548	-0.74543	0.561185
CHL1_HUMAN	IDPLEVEEGDPIVLPCNPPK	2.29	-0.023	-0.09	0.93013	0.01	0.93013	2.6047	2.72457	2.55305	2.97717	2.19045	2.26946	1.95569	2.41944	2.3334	2.55222	1.81398	1.74718	1.95954	1.91633	2.05536	2.40028	2.74542	2.78539	1.75513	1.81883	2.74304	2.85988	1.85314	1.90121	2.37109	2.60956	0.31461	0.893705	2.97706	3.01951	0.66849	1.04736	3.05922	3.20027	3.70563	3.61238	2.40504	2.70199	2.16496	1.9389
CHL1_HUMAN	ACTSQGCGKPITEESSTLGEGSK	0.11	0.425	1.46	0.15291	2.12	0.15291	-0.47871	0.02794	0.90705	1.40383	-0.30285	-0.08783	0.82921	0.564825	0.91752	0.86711	-0.56219	-0.06141	-0.41762	0.02169	0.25235	-0.20391	1.11413	1.61807	-0.465895	0.0902	-0.421765	0.112295	-0.2865	-0.1411	-0.70054	-0.38028	NA	-0.728645	0.05956	0.35314	-1.06279	-0.681135	0.38225	0.724935	0.83652	1.32009	0.339465	-0.32331	-0.65601	-0.593295
CHL1_HUMAN	GEILLLECFAEGLPTPQVDWNK	-1.55	-0.581	-1.11	0.27502	1.23	0.27502	-2.02878	-2.12879	0.49854	0.16109	-2.54726	-4.72396	-2.19364	-2.00835	-0.54758	-1.14736	-1.49824	-1.86033	-1.85512	-2.10199	-1.95188	-1.2355	NA	NA	-2.91822	-3.386	-0.464165	-1.49754	-2.19978	-1.93844	-1.80962	-2.6075	-2.88694	-1.84259	0.26119	-0.00402	-3.29046	-2.65067	-0.49313	-1.27795	0.58008	0.0555	-1.04232	-0.37236	-1.07553	-1.01961
CHL1_HUMAN	CTASNFLGTATHDFHVIVEEPPR	-0.1	-0.326	-1.02	0.3158	1.04	0.3158	0.20587	-0.14335	0.99062	1.0511	-0.89256	-0.27028	-0.36835	-0.021705	0.28745	0.24766	NA	NA	NA	-0.63284	-0.2642	-0.21092	-0.64391	-1.04271	-0.872295	-1.07737	0.265225	0.078505	-0.51851	-0.7142	0.03221	-0.50444	NA	NA	NA	0.91853	NA	-1.34065	1.03031	0.741125	NA	1.76557	0.209805	0.1422	-0.93095	-0.684745
CHL1_HUMAN	GAGPESEPYIFQTPEGVPEQPTFLK	2.92	0.076	0.29	0.76967	0.09	0.76967	2.77902	3.32457	3.66889	4.07479	2.22965	2.30894	2.76195	3.07764	3.37549	3.33876	2.65454	3.00107	2.77242	2.87266	2.65759	3.0793	2.93298	2.79209	2.57016	2.9785	3.06753	2.9194	2.31902	2.623	2.6886	2.84209	1.57295	2.25328	3.32878	3.63812	1.78494	2.24227	3.38258	3.66405	3.81538	3.72699	2.6968	3.34615	2.62962	3.19162
CHL1_HUMAN	GLPPLHIYWMNIELEHIEQDER	1.7	-0.616	-1.23	0.22696	1.51	0.22696	1.68943	1.39972	3.46397	3.38536	0.57425	0.87182	1.60117	1.66627	2.42123	2.30073	1.87562	2.01068	2.08785	1.66043	2.25333	2.27127	NA	-4.5971	0.967565	0.89926	1.79009	1.28902	1.51203	1.47732	1.29511	0.82608	0.58388	1.33384	2.76727	2.64609	1.39762	1.17288	2.40407	2.11373	3.25586	2.94336	2.48307	2.74768	1.66049	1.85435
CHL1_HUMAN	SQPSQPSDHHETPPAAPDRNPQNIR	-1.49	0.468	1.52	0.13547	2.32	0.13547	-1.61302	-2.45121	-0.37232	-0.49943	-2.04087	-2.61508	-0.18212	0.085005	-0.55454	-1.08685	NA	-1.76879	-1.69894	-1.709	-1.56442	-1.59171	-0.08454	-0.12982	-2.09822	-1.79392	-1.78181	-1.7109	-1.44665	-1.11969	-1.80626	-2.33146	NA	-2.04209	-1.37179	-1.7431	-2.85138	-2.84369	-1.13837	-1.15878	-0.39267	-0.21236	-1.74561	-1.77192	-2.84527	-2.51022
CHL1_HUMAN	KPQSAVYSTGSNGILLCEAEGEPQPTIK	-0.07	-0.531	-2.22	0.03294	4.93	0.03294	0.33814	0.37414	-0.08566	0.16446	-0.48849	-0.22725	0.01058	0.177325	0.16417	0.00454	NA	NA	-1.27157	-0.93712	-0.87909	-0.63988	0.0219	-0.10844	-1.39487	-0.94619	0.344975	0.579945	-0.23304	-0.02339	-0.08263	-0.0998	NA	NA	0.13624	0.14734	NA	NA	0.03925	0.275825	1.61434	1.56481	0.072805	0.08273	-0.41871	-0.586215
CK041_HUMAN	SSSMTTLAK	-4.23	0.797	1.18	0.25411	1.4	0.25411	NA	NA	-3.0814	-2.55527	NA	NA	NA	NA	-3.52271	-4.40345	NA	NA	NA	NA	NA	NA	-3.64861	-3.65835	NA	-5.60281	NA	-5.00502	NA	-7.26296	NA	NA	NA	NA	-4.2181	-3.92429	NA	NA	NA	-4.07531	NA	-3.65714	NA	-4.62191	NA	NA
CKAP2_HUMAN	AQSAFKEQR	-0.65	-3.639	-2.93	0.02453	8.56	0.02453	NA	NA	NA	NA	NA	NA	NA	NA	NA	NA	NA	-3.76452	NA	NA	NA	NA	NA	NA	NA	NA	0.192385	NA	NA	-1.68042	0.58042	1.42749	NA	NA	NA	NA	NA	NA	NA	NA	NA	NA	NA	NA	NA	NA
CL053_HUMAN	HVCVWER	0.45	0.174	0.38	0.70725	0.14	0.70725	-0.02747	0.17185	1.13498	1.19066	0.24936	0.06686	0.96874	0.726665	0.89199	0.82595	-0.12585	-0.13444	0.28824	0.7673	0.75088	0.77986	0.7502	0.65871	0.312115	0.52917	0.986145	1.01642	0.84457	0.62321	-0.07551	0.48993	-1.46218	-0.305505	0.81205	0.79168	-0.47924	0.108975	0.85508	1.02604	-2.30976	0.98518	1.79117	1.37623	0.20955	0.005495
CLIP2_HUMAN	AQVSALESK	-4.32	0.229	0.61	0.54733	0.37	0.54733	NA	NA	-3.54217	-4.0113	NA	NA	NA	NA	-4.60891	-4.85529	-4.61411	-3.76971	NA	NA	NA	-4.52031	-3.90654	-3.6708	-4.33889	-4.76239	NA	-5.56611	NA	NA	NA	NA	NA	NA	-3.76771	-3.80446	-4.7665	-5.56295	-4.29482	-4.51987	-4.07556	-4.01667	-3.93836	-4.1336	NA	NA
CLUS_HUMAN	KYNELLK	-0.51	0.301	0.83	0.41164	0.69	0.41164	-0.78647	NA	-1.3552	-0.58728	-0.31617	-0.40228	NA	NA	-0.61507	-0.42447	0.39246	NA	NA	-0.34582	NA	NA	-0.05828	NA	0.001395	0.24623	NA	NA	-0.50927	NA	-0.54616	-0.17209	-1.78192	-0.659645	-0.53353	-0.44851	NA	NA	-0.66419	-0.331545	-0.6758	-0.48716	-1.67268	-0.27943	-0.32965	-0.328295
CLUS_HUMAN	FMETVAEK	4.58	0.062	0.48	0.63576	0.23	0.63576	4.34571	4.62316	4.76105	4.83832	4.54952	4.55655	4.4658	4.32949	4.46628	4.50204	4.26969	4.23756	4.3453	4.55349	4.66437	4.59068	4.87219	4.9454	5.00183	5.19871	4.42054	4.43109	4.54674	4.525	4.76254	4.86565	4.0684	4.33352	4.69642	4.70993	4.07003	4.30417	4.60117	4.60332	4.63843	4.57288	4.78306	4.58313	4.77427	4.59617
CLUS_HUMAN	EIQNAVNGVK	3.22	0.212	1.04	0.30575	1.08	0.30575	2.89067	3.28232	3.1371	3.47484	3.37422	3.53274	3.30403	3.32844	3.53171	3.26862	2.69039	3.27295	2.87204	3.25432	3.44647	3.19317	3.47669	3.8505	3.43743	3.92339	2.79779	2.97146	3.07281	3.42695	3.01251	3.42205	2.73679	3.10934	3.10383	3.2067	2.5887	3.06178	2.99657	3.28661	3.08946	3.3085	3.55856	3.09435	3.03787	3.4222
CLUS_HUMAN	IDSLLENDR	4.47	0.182	0.92	0.36356	0.84	0.36356	4.13969	4.79393	4.23727	4.75482	4.53781	4.73238	4.43122	4.37944	4.57442	4.67872	4.11468	4.4649	4.29254	4.57714	4.75137	4.64714	4.58115	4.75655	4.70172	5.17098	4.20244	4.20538	4.33745	4.24974	4.54961	4.87901	3.50371	4.00368	4.29283	4.5552	3.86141	4.45381	4.3378	4.67887	4.32368	4.52018	4.68253	4.64899	4.63575	4.75068
CLUS_HUMAN	RPHFFFPK	2.16	-0.244	-0.8	0.42679	0.64	0.42679	3.02649	2.17638	1.49454	2.12778	2.19524	1.43355	2.20543	2.55709	2.10886	2.05798	2.08274	2.5532	2.4293	2.03782	1.77263	2.51352	1.03742	0.13166	2.37636	2.40939	2.46538	2.4222	1.76765	1.55403	2.61113	2.32821	2.53146	2.2441	2.41192	2.34535	2.26724	1.8597	2.2655	1.94518	2.43558	2.35294	1.67525	2.80982	2.73552	2.57046
CLUS_HUMAN	TLLSNLEEAK	6.46	-0.134	-0.22	0.82988	0.05	0.82988	6.83148	6.92043	1.69174	6.85232	6.55944	6.67366	6.44885	6.65365	6.66059	6.43786	6.29075	6.65845	6.35169	6.52076	6.51112	6.55297	6.60623	6.98617	6.64802	6.94549	6.26438	6.45793	6.15986	6.65862	6.63049	6.8659	6.38647	6.22422	6.58267	6.65283	6.19391	6.32374	6.46274	6.58272	6.6241	6.64391	6.64536	6.34329	6.75685	7.0214
CLUS_HUMAN	KTLLSNLEEAK	2.8	-0.032	-0.18	0.85682	0.03	0.85682	2.84894	3.17072	2.56518	2.96107	2.38464	2.3173	2.56858	3.06288	2.73424	2.60634	2.65391	2.74815	2.76123	2.75557	2.61664	2.78626	2.7355	3.14752	3.08632	3.12453	2.56646	2.83799	2.03358	2.55645	2.89698	3.19411	2.70603	2.65614	2.89004	2.90133	2.70325	2.57694	2.73642	2.94414	3.25546	2.75625	2.80776	2.9972	3.00927	3.24923
CLUS_HUMAN	ELDESLQVAER	4.83	0.147	0.96	0.34105	0.93	0.34105	4.87988	5.11967	4.35668	4.57346	4.86454	5.04583	4.97227	4.98341	4.92098	4.7321	4.45074	4.66058	4.55262	4.79373	4.84664	4.72259	5.19269	5.58469	5.41728	5.47271	4.58575	4.80494	4.77132	5.006	4.90264	5.16574	4.52789	4.43096	4.70018	4.61812	4.58506	4.65977	4.68911	4.77332	4.58155	4.55891	4.74958	4.54056	5.15279	5.40442
CLUS_HUMAN	ASSIIDELFQDR	6.48	-0.027	-0.2	0.84547	0.04	0.84547	6.48276	6.81839	6.62914	6.82243	6.23432	6.49067	6.21685	6.36515	6.49206	6.4629	6.43214	6.58441	6.5184	6.49181	6.53213	6.45718	6.1969	6.09103	6.45967	6.61418	6.3117	6.30119	6.12064	6.26326	6.78423	6.75758	6.22673	6.46676	6.55667	6.49892	6.24879	6.2873	6.65458	6.65547	6.88064	6.67888	6.43597	6.6091	6.3554	6.83078
CLUS_HUMAN	RELDESLQVAER	0.42	0.126	0.79	0.4348	0.62	0.4348	-0.07839	0.53517	0.19848	0.35488	0.47622	0.68722	0.64459	0.447235	0.28233	0.41975	0.35566	0.42101	0.34289	0.39466	0.42849	0.43587	0.76956	0.8091	0.724325	0.9435	0.002535	0.141235	0.39528	0.04022	0.68809	0.88773	-0.22567	0.183695	0.42471	0.50586	-0.1323	0.246835	0.36328	0.457515	0.53304	0.54914	0.450635	0.46273	0.43883	0.656575
CLUS_HUMAN	YVNKEIQNAVNGVK	0.1	-0.051	-0.12	0.90367	0.01	0.90367	-0.0072	-1.64823	0.22028	0.53172	0.40536	0.47752	1.3287	0.833865	0.58881	0.54827	-0.25681	-2.46306	-0.1111	0.43329	-0.20396	-0.21684	0.39066	0.52902	-0.312215	0.12887	-0.334015	-0.467735	0.32336	-0.61891	0.59559	1.00148	NA	0.416625	0.36931	0.40383	0.20814	0.321025	-0.41485	-0.000185	0.73642	0.88186	0.451185	0.03876	-1.1331	NA
CLUS_HUMAN	EILSVDCSTNNPSQAK	4.88	0.2	0.89	0.38054	0.79	0.38054	4.59954	5.14474	4.77354	5.35066	4.92643	5.15651	4.9412	4.77836	5.04362	5.10981	4.4068	4.88157	4.58134	4.88598	4.93417	4.85394	5.10227	5.30821	5.15228	5.70153	4.60342	4.60748	4.71063	4.60505	4.64837	5.18782	4.0434	4.9165	4.71819	5.04893	4.26149	4.7297	4.64833	5.07892	4.86389	5.07445	4.8888	4.84139	4.87634	5.28005
CLUS_HUMAN	QQTHMLDVMQDHFSR	4.64	-0.015	-0.11	0.91594	0.01	0.91594	4.96561	4.73054	5.1138	5.30446	3.94883	3.88028	4.59721	4.62646	4.6727	4.48582	4.62919	4.7136	4.39105	4.21978	4.72648	4.63603	4.47721	4.35792	5.00199	5.221	4.51056	4.46213	4.30814	4.49106	4.63438	4.44648	4.77016	4.79589	4.82843	4.78419	4.33679	4.23329	4.56181	4.63105	5.07063	4.87344	4.90303	4.79186	4.7544	4.81098
CLUS_HUMAN	LFDSDPITVTVPVEVSR	5.45	-0.126	-0.21	0.83108	0.05	0.83108	6.03018	6.16069	4.91033	5.22234	5.84312	5.86383	5.66551	5.8384	5.62884	5.56058	5.21161	5.297	5.44497	5.41549	5.9632	5.67978	5.68403	0.83125	5.65796	5.90684	5.71272	5.63849	5.70446	5.72711	5.7576	5.68175	4.85968	5.15038	5.49504	5.51828	5.33863	5.44585	5.64239	5.66702	5.09026	5.03924	5.09413	5.4581	6.07113	6.24754
CLUS_HUMAN	ASSIIDELFQDRFFTR	-2.04	-0.41	-0.73	0.47502	0.54	0.47502	NA	-2.6988	NA	NA	NA	NA	-3.47187	NA	NA	NA	-2.93757	-1.89714	NA	-1.96826	NA	NA	NA	NA	-1.14366	-1.02564	NA	NA	NA	NA	NA	NA	NA	NA	NA	NA	NA	NA	-1.7823	-1.79032	-2.80444	NA	NA	-1.99764	NA	-1.00883
CLUS_HUMAN	EPQDTYHYLPFSLPHR	5.91	-0.047	-0.35	0.72756	0.12	0.72756	6.03895	5.89853	6.37584	6.37358	5.54354	5.43944	5.90324	6.09987	6.00635	5.69184	5.87735	5.76061	5.93734	5.83281	5.86853	5.89982	5.52626	5.45996	6.01776	6.20032	5.71549	5.63654	5.53664	5.80987	6.04178	6.01674	6.18772	5.94562	6.14058	5.96915	5.81627	5.68384	5.93378	5.88863	6.46706	6.30155	5.78829	5.98178	5.91703	5.90885
CLUS_HUMAN	VTTVASHTSDSDVPSGVTEVVVK	6.29	0.121	0.84	0.40431	0.71	0.40431	6.43248	6.56248	6.28681	6.63271	5.92687	6.05061	6.43137	6.63075	6.41724	6.29273	6.03048	6.20115	6.01025	6.19941	6.13168	6.19057	6.43828	6.67741	6.6422	6.87643	5.94262	6.17063	5.79645	6.14508	6.21424	6.40695	6.10926	6.1867	6.22585	6.30116	5.93804	6.02914	6.12621	6.38781	6.54557	6.50126	6.23492	6.27932	6.42859	6.67525
CLUS_HUMAN	IDSLLENDRQQTHMLDVMQDHFSR	0.4	-0.138	-0.63	0.53235	0.4	0.53235	0.86685	0.59206	NA	0.93243	-0.24505	NA	0.29636	0.776555	0.12815	-0.1545	NA	NA	0.32644	NA	-0.13629	0.21094	-0.36704	NA	0.766995	0.58943	0.146395	-0.061405	-0.00994	NA	0.77732	0.46506	0.76593	0.657335	NA	0.66156	0.36808	-0.030725	NA	0.045575	1.24266	1.00615	0.327995	0.71031	0.55739	0.252395
CMGA_HUMAN	EAVEEPSSK	-1.76	0.573	1.19	0.24117	1.42	0.24117	-3.65952	-3.49145	0.48968	0.25379	-1.39714	-1.78586	-1.31884	-1.92336	-0.69885	-0.95648	-1.96341	-1.03306	-1.90375	-1.75574	-1.07655	-2.01531	-0.99309	-0.40566	-2.22864	-2.65915	-2.13923	-1.35145	-1.52592	-1.61564	-4.16266	-4.20629	NA	-4.22569	-1.13863	-1.08194	-2.28108	-2.33548	-1.1877	-1.19324	-0.3682	-0.33053	0.229405	-0.88485	-3.78897	-4.53416
CMGA_HUMAN	VAHQLQALR	2.36	0.055	0.23	0.8202	0.05	0.8202	1.88098	2.20643	3.85164	3.79414	1.79616	1.60084	2.22182	2.17264	2.72883	2.67795	2.13482	2.57651	2.25901	2.3189	2.03286	2.25489	2.65953	2.53642	2.04	1.96558	2.92573	2.83662	1.55964	1.68295	1.96213	2.0102	1.06606	1.09906	2.97506	2.97611	1.32392	1.42481	2.57179	2.76216	3.49227	3.39022	3.15078	3.23461	2.00787	2.16626
CMGA_HUMAN	GLSAEPGWQAK	1.53	0.008	0.03	0.97585	0	0.97585	0.75885	1.05248	2.75318	3.15912	1.28337	1.17334	1.2713	0.914425	1.83107	1.60096	0.98473	1.0852	1.28715	1.36183	1.32951	1.39223	1.92476	1.90206	1.32197	1.60945	2.18452	2.07904	1.3226	0.76072	1.18691	1.17862	-0.30686	NA	2.1968	2.21472	0.38564	0.740335	1.81978	2.01048	2.25403	2.39292	2.33567	2.16673	1.43556	1.47209
CMGA_HUMAN	ELQDLALQGAK	2.1	0.2	0.68	0.49961	0.46	0.49961	1.81137	2.11746	3.34175	3.78634	1.44426	1.76808	1.58907	1.84387	2.694	2.52921	1.82554	1.82311	1.70655	1.979	2.07758	2.00483	2.66217	3.09557	1.73304	2.17319	2.61633	2.85769	1.01473	1.73775	1.51537	1.8191	0.0223	0.396765	2.71936	2.76937	1.00908	1.0972	2.28395	2.44062	3.05017	2.80073	2.95736	2.79971	1.8347	2.27368
CMGA_HUMAN	SGELEQEEER	2.27	0.219	0.77	0.44352	0.6	0.44352	1.42601	1.95721	3.35408	3.65971	2.54149	2.28135	2.074	2.12222	2.92377	2.63204	1.64825	2.29488	1.96701	2.27065	2.25677	2.09383	2.74376	3.25278	1.8119	2.35549	2.37377	2.9861	2.21273	2.5047	1.18792	1.62574	0.8144	1.13109	2.56266	2.68797	1.26693	1.69579	2.53684	2.79194	2.77937	3.01443	3.13088	2.76536	1.40161	1.81082
CMGA_HUMAN	EDSLEAGLPLQVR	2.91	0.083	0.31	0.76105	0.09	0.76105	2.76054	2.98057	4.32796	4.58944	1.57969	1.5669	2.57044	2.89704	3.5742	3.32971	2.86228	3.03785	2.94765	3.06144	3.05148	2.93127	3.44787	3.78387	1.79201	1.88884	2.52379	2.61259	2.09858	2.39382	1.81389	1.69017	1.96254	2.00678	3.72135	3.74469	2.32295	2.27846	3.37364	3.55029	4.09168	4.13098	3.60455	3.70182	2.8131	2.88352
CMGA_HUMAN	EEEEEMAVVPQGLFR	4.4	0.075	0.32	0.75401	0.1	0.75401	4.71673	4.53643	5.35156	5.66854	3.95118	4.02529	4.0568	4.37333	4.90247	4.61532	3.95013	4.15892	3.90038	4.24033	4.19375	4.39651	4.65087	4.77427	3.94158	4.38486	5.22049	5.1773	3.97233	4.38257	3.94351	4.00533	2.719	3.18914	4.85009	4.83339	3.56452	3.62109	4.72314	4.84943	4.63225	4.88735	4.59805	4.91957	4.34469	4.85421
CMGA_HUMAN	YPGPQAEGDSEGLSQGLVDR	4.96	0.108	0.45	0.65794	0.2	0.65794	4.86795	5.04881	6.00362	6.34418	4.49535	4.60927	4.73308	5.07066	5.37227	5.25732	4.54077	4.76635	4.56056	4.94482	4.63884	4.86811	5.21832	5.41231	4.52853	5.02692	5.49847	5.64687	4.57418	5.04011	4.40348	4.46097	3.44521	3.78973	5.31304	5.4027	3.90584	4.18307	5.02675	5.43004	5.58955	5.59534	5.49062	5.6521	4.64168	5.06628
CMGA_HUMAN	RPEDQELESLSAIEAELEK	4.14	0.128	0.54	0.59246	0.29	0.59246	4.09388	4.35904	5.34132	5.64172	3.47368	3.56603	3.97496	3.99742	4.67696	4.6669	4.03342	4.22838	4.08521	4.07105	3.98505	4.21115	4.02038	3.82736	3.77985	3.99452	4.5487	4.4283	3.46764	3.58125	3.53864	3.51842	2.40337	3.00806	4.70222	4.6728	3.37429	3.24686	4.54773	4.61167	5.06748	4.83618	4.62387	4.86952	4.02501	4.39081
CMGA_HUMAN	SGEATDGARPQALPEPMQESK	3.75	0.133	0.55	0.5839	0.3	0.5839	3.52231	3.8224	4.80287	5.28692	3.25751	3.37607	3.85014	3.69754	4.16674	4.07567	3.18772	3.585	3.41999	3.59965	3.52846	3.44746	4.17982	4.19668	3.45709	3.90242	4.33817	4.3647	3.58763	3.37903	3.24553	3.45144	2.12685	2.74526	4.03644	4.18086	2.6104	3.02577	3.93785	4.18982	4.40019	4.52933	4.20395	4.22485	3.43749	3.68494
CMGA_HUMAN	SEALAVDGAGKPGAEEAQDPEGK	3.25	0.222	0.91	0.36876	0.83	0.36876	3.01824	3.26467	4.50139	4.8534	2.83215	3.03863	3.42008	3.37077	3.78623	3.69	2.7764	3.00694	2.86598	3.12232	3.0624	2.90151	3.57991	3.86944	2.97189	3.38977	3.76846	3.86957	3.01309	2.86127	2.55972	2.73563	1.52583	2.09884	3.56319	3.65817	2.16429	2.52394	3.4632	3.65448	3.89341	4.01676	3.8131	3.72256	2.78767	3.18176
CMGA_HUMAN	YPGPQAEGDSEGLSQGLVDREK	0.66	0.249	0.33	0.75473	0.11	0.75473	NA	NA	0.61578	0.96037	NA	NA	NA	NA	NA	NA	NA	NA	NA	NA	NA	NA	NA	NA	NA	NA	NA	NA	NA	NA	NA	NA	NA	NA	NA	NA	NA	NA	NA	NA	NA	0.96137	0.116125	NA	NA	NA
CMGA_HUMAN	HSGFEDELSEVLENQSSQAELK	4.38	0.003	0.01	0.99064	0	0.99064	4.13698	4.73027	5.55118	5.81874	3.85568	3.93654	4.11983	4.35049	4.78126	4.61906	4.19961	4.44048	4.12878	4.22555	4.12587	4.25656	4.26179	4.00975	3.83814	4.21156	4.98222	5.00061	4.06088	4.19881	3.89837	3.81295	3.0649	3.42796	4.78548	4.94699	3.22154	3.59214	4.80583	4.79617	5.2931	5.16676	4.84663	4.88505	4.15692	4.59917
CMGA_HUMAN	KHSGFEDELSEVLENQSSQAELK	0.78	NA	NA	NA	NA	NA	NA	NA	NA	0.77692	NA	NA	NA	NA	NA	NA	NA	NA	NA	NA	NA	NA	NA	NA	NA	NA	NA	NA	NA	NA	NA	NA	NA	NA	NA	NA	NA	NA	NA	NA	NA	NA	NA	NA	NA	NA
CMGA_HUMAN	GEQEHSQQKEEEEEMAVVPQGLFR	3.71	-0.156	-0.88	0.38359	0.78	0.38359	4.20561	3.7935	4.52177	4.76603	3.3103	3.25771	3.75737	3.93295	3.73075	3.47871	3.16347	3.19788	3.39503	3.41916	3.4827	3.50205	3.64346	3.45973	3.38451	3.42604	4.15524	4.14358	3.50174	3.85426	3.2956	3.1951	NA	NA	3.89934	3.79072	NA	NA	3.81495	3.90767	4.22936	4.11988	3.83327	3.95038	3.61522	3.45033
CMGA_HUMAN	CIVEVISDTLSKPSPMPVSQECFETLR	-0.38	NA	NA	NA	NA	NA	NA	NA	-0.48833	-0.27093	NA	NA	NA	NA	NA	NA	NA	NA	NA	NA	NA	NA	NA	NA	NA	NA	NA	NA	NA	NA	NA	NA	NA	NA	NA	NA	NA	NA	NA	NA	NA	NA	NA	NA	NA	NA
CMGA_HUMAN	SEALAVDGAGKPGAEEAQDPEGKGEQEHSQQK	-0.45	-0.238	-0.7	0.49228	0.49	0.49228	NA	-1.51219	0.28577	0.22674	-1.05591	NA	-0.31699	-0.423165	-0.22689	-0.3916	NA	NA	NA	NA	-1.18674	-1.66006	-0.05365	NA	NA	NA	-0.088445	0.105975	-0.94245	NA	NA	NA	NA	NA	NA	NA	NA	NA	NA	-0.629225	0.03102	0.40591	NA	-0.70694	NA	NA
CMGA_HUMAN	AEGNNQAPGEEEEEEEEATNTHPPASLPSQK	1.06	0.281	0.99	0.3269	0.98	0.3269	1.23448	1.5223	1.9637	2.20699	0.48605	0.88752	1.57486	1.69562	1.68883	1.54187	0.25678	0.56551	0.50258	0.90528	0.56998	0.44509	1.84114	2.13483	0.724165	1.3351	1.64264	2.15017	0.93876	1.46611	0.47959	0.67789	-0.80342	-0.815995	1.04103	1.10337	-0.11622	0.056145	1.37659	1.43752	1.3989	1.78864	1.13312	1.30473	0.79008	1.4145
CN045_HUMAN	LLFAKMNGCPSRK	3.35	0.507	1.79	0.08138	3.19	0.08138	4.61746	4.42447	1.80977	1.94839	4.66304	4.58738	3.14198	3.52836	3.28029	3.17137	2.62588	2.7959	3.21483	3.25426	3.73134	3.95544	4.60989	4.83271	3.92814	3.97994	3.59525	3.69984	3.1509	3.54379	3.6719	3.73393	1.65633	1.9583	2.4493	2.55822	3.02897	3.13346	3.43114	3.44691	1.92163	2.06109	2.93424	3.24917	4.24477	4.4951
CND3_HUMAN	ATQASKSTQLK	-0.72	0.396	0.61	0.55333	0.37	0.55333	0.11517	0.59845	NA	NA	NA	NA	NA	NA	NA	NA	NA	NA	NA	NA	NA	NA	NA	-1.60339	NA	NA	-1.10895	-1.23151	NA	NA	-0.70435	-0.92837	NA	NA	NA	NA	NA	-1.62969	NA	NA	NA	NA	NA	NA	-0.69382	0.014505
CNDP1_HUMAN	DGSTIPIAK	1.56	-0.077	-0.33	0.74075	0.11	0.74075	1.18069	1.4546	2.0059	2.00705	1.83478	1.88689	0.99233	NA	1.44981	1.40491	1.57806	1.77352	0.79033	0.93618	2.14188	2.02638	1.40742	NA	1.28639	1.3396	2.19468	2.10263	1.2409	NA	0.50892	0.47581	NA	NA	2.51108	2.54744	0.68382	0.894975	1.88776	1.92714	1.04372	0.96353	2.61524	2.33362	NA	NA
CNDP1_HUMAN	HLEDVFSK	2.21	0.275	0.89	0.37878	0.79	0.37878	2.32628	2.42669	2.86553	3.1259	2.42055	2.59625	1.901	1.28547	2.54091	2.4789	2.56676	2.61984	1.46447	1.71955	3.36282	3.07234	1.83326	2.10913	2.00286	2.28662	3.03429	2.94832	2.12244	1.56039	1.11985	1.44432	1.05177	1.37037	3.47935	3.5413	1.45495	1.85546	2.54866	2.71008	1.89404	1.94487	3.87095	3.26569	0.19342	0.099635
CNDP1_HUMAN	KPAITYGTR	-0.63	0.37	1.05	0.30177	1.09	0.30177	-0.47222	-0.76645	0.37423	0.23054	-0.38868	-0.46427	-0.75284	-1.10458	-0.22913	-0.68408	-0.25006	0.1051	-1.40046	-1.43184	0.25204	0.34724	-0.83574	-0.75162	-0.640525	-0.52893	0.144005	0.419255	-0.85862	-0.69024	-2.40564	-2.18062	NA	-1.56032	0.80968	0.77208	NA	-0.974995	-0.16001	-0.143305	-1.14615	-1.10524	1.07988	0.86873	-3.50843	-3.7746
CNDP1_HUMAN	WNYIEGTK	0.85	0.031	0.11	0.91443	0.01	0.91443	0.82693	0.95739	1.2341	1.59384	0.94503	1.00822	-0.08764	-0.042345	0.91549	0.70854	1.02066	1.37288	-0.13644	-0.0241	1.78699	1.64008	0.55164	0.98411	0.368415	0.83527	1.62003	1.65163	0.37499	0.74643	-0.5302	-0.29296	-0.32789	NA	1.93718	2.01238	0.22486	0.391975	1.272	1.22849	-0.09193	NA	2.20422	1.89936	NA	NA
CNDP1_HUMAN	GNSYFMVEVK	-0.08	0.228	0.68	0.49994	0.46	0.49994	0.28892	0.19726	1.11996	1.18657	-0.40222	-0.37369	-0.62135	-0.720865	0.29895	0.19623	0.53568	0.74208	-0.74029	-0.66742	1.101	1.04614	-0.9681	-1.35451	0.004995	-0.12093	0.959185	0.930285	-0.6141	-0.50337	-1.66507	-1.59467	-0.50197	-0.904795	1.5754	1.40112	-0.60951	-0.766515	0.56067	0.498895	-0.1895	-0.73487	1.47555	1.33525	-2.33553	-2.12148
CNDP1_HUMAN	MMAVAADTLQR	2.08	0.121	0.45	0.65171	0.21	0.65171	2.2564	2.25285	2.78835	2.83188	2.14634	2.08268	1.26528	1.51449	2.31623	2.09513	2.50352	2.70712	1.55762	1.41302	2.75297	2.75768	1.72861	1.90312	1.86898	2.15149	3.05612	3.27282	1.65505	1.99469	1.02943	1.21423	1.32881	1.39631	3.5898	3.28507	1.69507	1.56736	2.58346	2.52282	1.76093	1.54929	3.08491	3.15533	0.20907	0.526135
CNDP1_HUMAN	EEILMHLWR	-0.37	0.193	0.37	0.71452	0.14	0.71452	NA	-0.46263	1.20702	NA	-1.12013	-1.42312	-0.63129	-0.426235	0.24647	0.35905	-0.96587	0.6973	-0.2953	0.1052	-0.48747	0.99988	-1.73566	-1.56922	NA	NA	-1.44254	0.913835	-1.20594	-1.16593	-1.3355	-0.77033	NA	-1.1097	-0.13565	0.06457	NA	-0.868065	0.39051	-0.457755	NA	-0.93079	1.10051	1.40963	-0.69904	-0.509605
CNDP1_HUMAN	ALEQDLPVNIK	3.32	0.224	0.85	0.4006	0.72	0.4006	3.48928	3.7578	3.85541	4.06183	3.40423	3.56711	2.59606	2.95948	3.61268	3.45854	3.5536	3.91676	2.59253	2.90479	3.90164	3.90604	3.20644	3.52892	3.03574	3.36648	3.97214	4.24237	2.66827	3.21896	2.28704	2.48895	2.53472	2.62817	4.43259	4.47299	2.68545	3.01702	3.5095	3.85061	2.96784	2.98946	4.41167	4.40732	1.55529	1.84747
CNDP1_HUMAN	AIHLDLEEYR	-0.32	0.367	0.89	0.38121	0.79	0.38121	NA	0.33168	0.87489	0.63514	NA	-1.03647	-1.49806	NA	-0.41083	-0.54842	0.2313	0.1077	NA	NA	NA	0.09605	NA	NA	NA	NA	0.312805	NA	NA	NA	NA	-2.17144	-1.01931	-1.24284	0.92566	0.95945	-0.84074	-1.26581	0.03778	-0.183995	-0.6231	-0.56588	0.728765	0.64775	-2.44483	NA
CNDP1_HUMAN	TVFGTEPDMIR	1.92	0.118	0.46	0.65138	0.21	0.65138	2.14064	2.2298	2.67491	2.76901	1.83395	1.92301	1.11694	1.35418	2.06432	1.87378	2.33217	2.26211	1.29934	1.36694	2.58219	2.66151	1.59851	1.78356	1.6763	2.06724	2.82558	2.935	1.43128	1.90896	0.98619	1.22221	1.10083	1.23588	3.24769	3.17039	1.42715	1.51364	2.25784	2.35826	1.64935	1.61663	3.01589	2.9463	0.03421	0.364665
CNDP1_HUMAN	GPVLAWINAVSAFR	0.14	0.083	0.15	0.88523	0.02	0.88523	-0.02921	-0.05065	2.51034	2.20581	-1.5344	-1.98977	-1.76996	-1.00415	0.78041	0.0409	1.83766	1.94797	0.29919	-0.0738	1.51324	1.96437	NA	NA	-1.78801	-1.58931	0.916695	0.581615	-1.02385	-0.80342	-2.02144	-2.12351	0.62018	0.727655	2.61266	2.84385	0.31104	-0.040625	0.8206	0.597995	0.11975	-0.16746	2.04915	2.73804	-3.65137	-3.12898
CNDP1_HUMAN	LFAAFFLEMAQLH	-3.66	-0.931	-0.67	0.52506	0.44	0.52506	NA	NA	-2.65415	-4.87711	NA	NA	NA	NA	NA	NA	-4.65772	NA	NA	NA	NA	NA	NA	NA	NA	NA	-3.48251	NA	NA	NA	NA	NA	NA	NA	-2.24794	NA	NA	NA	NA	NA	NA	NA	-4.0496	NA	NA	NA
CNDP1_HUMAN	EWVAIESDSVQPVPR	1.45	-0.129	-0.3	0.767	0.09	0.767	0.11576	0.48787	2.65185	2.65702	1.81275	1.76008	-0.01633	0.579265	0.90951	0.70589	2.16608	2.48143	1.76359	1.80644	2.37875	2.35973	0.18697	0.63863	1.58625	0.76548	2.433	0.790315	-0.14383	1.6406	-0.07495	0.35563	1.39768	1.54082	2.77491	2.74694	1.54121	1.70395	2.15764	2.26821	1.78923	1.98337	2.78057	2.87864	-0.30442	0.108935
CNDP1_HUMAN	GDGWLTDPYVLTEVDGK	2.39	-0.06	-0.21	0.83103	0.05	0.83103	2.91569	2.74817	3.0413	3.37043	2.18128	2.09345	1.34862	1.75987	2.48309	2.27513	2.91473	3.31353	1.7717	1.83377	3.18618	3.24015	1.33297	1.0443	2.03775	2.253	2.89506	2.97533	1.57173	1.93237	1.30252	1.14899	1.62166	1.86408	3.42248	3.58277	2.14628	2.07561	2.86004	3.07328	1.97724	1.86554	3.4482	3.74809	NA	NA
CNDP1_HUMAN	YPSLSIHGIEGAFDEPGTK	2.42	0.212	0.75	0.46008	0.56	0.46008	2.97075	3.02997	3.09653	3.34279	2.43919	2.50824	1.93474	2.20885	2.66445	2.67672	2.9297	2.99647	1.7577	2.00815	3.09797	3.24288	1.53764	1.71484	1.93822	2.40744	3.17659	3.38918	1.79655	2.07329	1.31049	1.515	1.34525	1.90495	3.73266	3.74423	1.6639	1.93393	2.94611	3.10826	2.21888	2.23761	3.40728	3.452	0.44025	0.870485
CNDP1_HUMAN	GATDNKGPVLAWINAVSAFR	0.87	-0.257	-0.56	0.58105	0.31	0.58105	1.33713	1.18379	1.60066	1.9799	0.69039	0.64398	0.38052	0.437745	1.23426	0.96527	1.55859	2.04687	0.56433	0.71535	2.02287	1.99443	-3.54727	NA	-0.028095	-0.0574	1.87916	1.87696	0.61458	0.39744	-0.18374	0.05273	0.48751	0.526755	2.48605	2.54454	0.65316	0.725145	1.4327	1.6819	1.16614	0.80145	2.32178	2.73752	-2.3243	-1.82099
CNDP1_HUMAN	SVVLIPLGAVDDGEHSQNEK	3.01	0.158	0.66	0.51593	0.43	0.51593	3.10435	3.30223	3.73235	4.01123	2.83519	2.8767	2.53292	2.80378	3.36207	3.10216	3.4167	3.25067	2.38539	2.49219	3.41213	3.52294	2.77864	3.01555	2.72301	3.06078	3.73198	3.87464	2.60118	2.90001	1.90029	2.03742	2.24501	2.38786	4.21276	4.23746	2.57667	2.69415	3.33077	3.49589	2.93372	2.89397	3.83197	3.87495	1.32223	1.47359
CNDP1_HUMAN	VFQYIDLHQDEFVQTLK	2.88	0.025	0.09	0.92791	0.01	0.92791	3.38166	3.30168	3.56654	3.83655	2.88122	2.99378	2.33089	2.50405	3.02149	2.99596	3.45843	3.65532	2.34235	2.27466	3.38251	3.60889	1.60421	1.83821	2.37154	2.44373	3.59471	3.8136	2.28287	2.40286	2.02428	2.12355	2.35643	2.70386	4.20382	4.28383	2.63444	2.36216	3.27025	3.40268	2.78952	2.68682	3.90383	4.11257	1.18529	1.16623
CNDP1_HUMAN	FIIEGMEEAGSVALEELVEK	0.87	-0.258	-0.39	0.70278	0.15	0.70278	NA	NA	2.75917	2.26813	0.23768	0.87996	NA	-0.352785	1.14175	-0.35344	2.13326	1.31285	0.55846	NA	NA	NA	-1.71172	NA	NA	NA	1.626	-0.094095	NA	NA	-1.06658	NA	1.35687	1.34753	3.05732	2.73512	0.01863	0.332925	NA	0.314175	0.63303	-0.13262	NA	1.77776	NA	NA
CNDP1_HUMAN	FFSGVDYIVISDNLWISQR	-5.62	1.68	1.79	0.16101	3.2	0.16101	NA	NA	NA	NA	NA	-4.78267	NA	NA	NA	NA	NA	NA	NA	NA	NA	NA	NA	NA	NA	NA	NA	NA	NA	NA	NA	NA	NA	NA	NA	NA	NA	NA	NA	NA	NA	NA	-6.46228	NA	NA	NA
CNDP1_HUMAN	FIIEGMEEAGSVALEELVEKEKDR	-1.93	-0.538	-1.03	0.31497	1.06	0.31497	-3.14572	-2.7378	-1.63719	-1.27389	NA	NA	NA	-3.76152	NA	NA	-2.26704	-1.69523	NA	NA	-1.78994	-1.548	NA	NA	NA	NA	-1.61987	-2.06818	-3.09204	NA	NA	NA	NA	NA	-0.35044	-0.00146	NA	NA	-2.86259	-2.7568	-2.30796	-2.75573	-0.504785	-0.40266	NA	NA
CNDP1_HUMAN	MVVSMTLGLHPWIANIDDTQYLAAK	-2.85	0.774	0.78	0.44506	0.6	0.44506	NA	NA	-0.49348	-1.82137	NA	-4.20865	NA	NA	-2.41156	-3.86943	-2.11547	-3.62215	NA	NA	-0.47428	-2.12136	NA	NA	NA	NA	-2.47946	-4.66941	-4.25149	NA	NA	-4.95245	-3.14905	-4.27238	-0.02319	-1.6891	-4.48565	-5.64065	-2.9036	NA	NA	NA	-0.989045	-1.86192	NA	-2.94626
CNDP1_HUMAN	VASVDMGPQQLPDGQSLPIPPVILAELGSDPTK	1.68	-0.127	-0.3	0.7682	0.09	0.7682	1.87936	1.95361	3.17605	3.28813	0.62646	0.62987	0.75473	1.08754	2.19179	1.96872	2.72621	2.68857	1.09995	1.32169	2.72029	2.9033	-0.29647	-1.70338	1.50974	1.89386	2.33678	2.40902	0.76984	1.17615	-0.07551	0.05237	1.45205	1.83319	3.41342	3.67515	1.29018	1.51598	2.74303	2.75	1.52411	1.45136	2.97621	3.55639	-0.12699	0.231055
CNTN1_HUMAN	VVATNTLGR	-0.52	0.262	1.17	0.24717	1.38	0.24717	-0.09622	-0.48572	-0.9848	-0.56239	-0.08922	-0.08752	-0.59874	-0.711855	-0.24337	-0.75484	-1.04452	-0.69752	-1.22334	-0.87162	0.05162	-0.1265	0.33567	0.44707	-0.161265	0.06502	-0.811155	-0.779935	-0.72678	-0.5205	-0.60314	-0.59405	-1.88165	-1.39172	-0.72218	-0.64418	-1.60317	-1.01755	-0.07679	0.197445	-0.163	-0.31438	0.031475	-0.30485	-0.624	-0.526765
CNTN1_HUMAN	TILSDDWK	1.19	0.117	0.73	0.47234	0.53	0.47234	1.40827	1.48946	NA	1.41518	1.06775	1.02224	0.96228	0.842185	1.24225	1.07005	0.91652	1.1653	0.78371	0.7796	1.63004	1.58008	1.51733	1.78442	1.40922	1.60238	1.0921	1.12626	0.78318	0.92178	1.13265	1.11463	0.41145	0.225215	1.44558	1.4279	0.52769	0.470395	1.61077	1.88874	1.72375	1.66079	1.46144	1.33862	1.15082	1.22063
CNTN1_HUMAN	IVESYQIR	-0.25	-0.022	-0.09	0.92732	0.01	0.92732	-0.7329	-0.16461	-0.55959	-0.14889	-0.22763	0.02348	-0.63312	-1.23835	-0.55378	-0.37435	-0.89666	-0.67445	-0.7671	-0.50371	-0.04487	NA	0.2936	0.4876	0.167005	0.63007	-0.360215	-0.319785	-0.36761	-0.63677	-0.08162	0.3749	-1.39738	NA	-0.0058	0.08073	-1.19429	NA	0.16725	0.274115	0.1297	0.13713	0.190705	0.02464	-0.28942	-0.064075
CNTN1_HUMAN	HSIEVPIPR	0.08	0.22	0.67	0.50447	0.45	0.50447	0.70088	0.26732	0.81646	0.67003	0.0391	-0.16109	-0.01324	-0.302395	0.55794	0.14511	0.21136	0.16761	-0.10937	-0.32939	0.40723	-0.0664	0.23879	0.40128	0.248355	-0.1096	-0.207225	-0.109055	-0.23215	-0.24392	-2.13668	0.01062	-0.2972	-0.375785	0.37784	0.34035	-0.60854	-0.751665	0.75742	0.226875	1.0494	0.85744	0.829215	0.20146	-0.09793	-0.203925
CNTN1_HUMAN	VTVTNPDTGR	-1.65	0.418	1.36	0.18214	1.84	0.18214	-2.19459	-1.66331	-1.70505	-1.55565	-1.07521	-1.10908	-1.79502	-1.9931	-1.03531	-1.63711	-2.29473	-1.40352	-2.25563	-1.75872	-0.7719	-1.209	-0.9578	-0.26073	-1.31866	-0.75995	-2.70829	-2.15918	-1.95276	-1.2532	-2.32873	-1.76572	-2.55103	-2.52128	-1.65463	-1.4814	-2.59786	-2.12905	-1.1167	-0.745295	-1.14346	-1.06156	NA	-1.58018	-2.74312	-1.99643
CNTN1_HUMAN	DGEYVVEVR	0.7	-0.329	-0.38	0.70517	0.15	0.70517	0.7651	1.04391	0.58159	0.93579	NA	NA	NA	NA	1.01122	0.70939	0.60396	1.02697	0.45327	0.75646	-2.95106	1.09252	NA	NA	NA	NA	NA	NA	0.99018	1.21737	0.95972	1.22632	-0.62278	NA	NA	NA	NA	NA	1.26887	1.51083	0.851	0.92548	NA	1.02825	NA	NA
CNTN1_HUMAN	FIPLIPIPER	3.61	-0.012	-0.07	0.94126	0.01	0.94126	3.90383	3.89764	3.64091	3.65442	3.74886	3.76609	3.19881	3.58067	3.53408	3.42749	3.47528	3.54795	3.47697	3.24258	3.63932	3.89597	3.55765	3.68091	3.50007	3.69707	3.45323	3.3804	3.09856	3.6676	3.86116	3.79999	3.33854	3.27522	3.81025	3.81031	3.11406	3.0183	4.15999	4.02865	4.03132	3.7395	3.62742	3.94281	3.4547	3.6851
CNTN1_HUMAN	VQVTSQEYSAR	-0.11	0.283	1.06	0.2981	1.11	0.2981	NA	NA	-0.2098	0.06359	0.01396	-0.01587	-0.45196	-0.224365	0.27462	-0.02666	-0.91159	-0.04862	NA	-0.37519	0.37645	0.0483	0.37371	0.74838	0.274195	0.80622	-0.675085	-0.277875	-0.28501	0.05869	-0.52784	-0.24398	-1.33279	-1.00883	-0.36142	-0.05625	-1.11921	-0.644625	0.25824	0.616855	0.16211	0.37858	0.408545	-0.03275	NA	NA
CNTN1_HUMAN	MNNGDVDLTSDR	0.95	0.273	1.2	0.23876	1.43	0.23876	0.7397	1.40405	0.79315	1.38575	1.27621	1.40864	0.83983	0.939175	1.0464	0.91787	0.4668	0.5673	0.19086	0.52269	1.29987	1.45588	1.4856	1.74123	1.28564	1.94645	0.468085	0.747615	0.87691	0.94224	0.90704	1.22632	-0.07522	0.309505	0.57988	1.0198	0.01488	0.331375	1.18221	1.47033	0.97916	1.09086	1.3355	0.92301	0.86432	1.06898
CNTN1_HUMAN	AHSDGGDGVVSQVK	0.02	0.113	0.2	0.84285	0.04	0.84285	-0.61546	-0.3228	NA	NA	-0.02139	-0.01654	0.15718	NA	NA	NA	NA	NA	NA	NA	NA	NA	0.17096	0.56625	NA	0.31281	NA	NA	NA	-0.04848	NA	NA	NA	NA	NA	NA	NA	NA	NA	NA	NA	NA	NA	NA	NA	NA
CNTN1_HUMAN	VLYRPDGQHDGK	-1.21	0.404	2.22	0.03281	4.91	0.03281	-1.34981	-1.27373	-0.61085	-0.71719	-1.14645	-1.18604	-0.75793	NA	-0.7006	-1.03267	-1.58135	NA	-1.58996	-1.46951	-0.92326	-0.89848	-1.07559	-0.71846	-0.718835	-0.63907	NA	-1.93013	-1.39598	-1.41432	-1.68927	-1.602	NA	-1.70423	-1.13819	-1.27226	-2.08306	-1.9973	-0.749	-0.757955	-0.66986	-0.65164	-0.786255	-0.93284	-2.17169	-2.31798
CNTN1_HUMAN	DETMSPSTAFQVK	-0.19	0.279	1.07	0.29118	1.14	0.29118	0.33366	0.38687	-0.52393	-0.02713	-0.09925	-0.57775	-0.46288	-0.505055	0.14346	-0.11957	-0.87424	-0.20131	-0.89693	-0.63867	0.31402	0.19273	0.29269	0.70281	0.602625	0.89824	-0.452245	-0.046625	-0.49499	-0.27382	-0.27224	-0.15035	-1.91533	-0.961205	0.12934	0.07049	-0.67434	-1.10763	0.162	0.582035	-0.49365	-0.01592	-0.452225	-0.41977	0.09496	0.044865
CNTN1_HUMAN	ILALAPTFEMNPMK	2.72	-0.062	-0.36	0.72356	0.13	0.72356	2.81158	3.09898	3.22732	3.42404	2.27347	2.12707	2.07568	2.41561	2.744	2.46229	2.50482	2.76446	2.3289	2.40072	2.79745	2.9862	2.43633	2.4671	3.05679	3.30048	2.54435	2.63368	2.36948	2.77419	2.70039	2.485	2.40211	2.61242	3.00213	3.07811	1.9636	2.0553	3.33708	3.38117	2.95541	2.85228	2.76573	2.89062	2.95015	3.19125
CNTN1_HUMAN	TTKPYPADIVVQFK	1.95	0.083	0.61	0.54548	0.37	0.54548	2.23421	2.1373	2.209	2.26016	1.59465	1.61562	1.98517	1.99656	2.01217	1.80226	1.77337	2.05045	1.56293	1.56529	2.16534	2.2122	1.86645	1.96217	2.36503	2.42783	1.73199	1.70432	1.41969	1.75124	1.85377	2.02656	1.80691	1.53727	2.05526	2.04245	1.3338	1.3758	2.37392	2.35934	2.17015	2.21482	2.10505	2.12807	2.02642	2.11183
CNTN1_HUMAN	YSMVGGNLVINNPDK	0.75	0.166	0.93	0.35972	0.86	0.35972	0.86444	1.11162	0.92975	1.22469	0.48353	0.58038	0.49482	0.643935	0.96485	0.89214	0.41063	0.85267	0.0926	0.54034	0.96547	1.02542	0.77682	0.95181	1.25334	1.50632	0.470105	0.707705	0.23681	0.6181	0.53732	0.89695	0.22133	0.168895	0.80045	0.78763	-0.06818	-0.022815	1.07767	1.40142	0.82617	0.79919	0.924755	0.8874	0.87586	1.09963
CNTN1_HUMAN	NDGGIYTCFAENNR	1.25	0.177	0.64	0.53019	0.42	0.53019	1.35563	1.36538	NA	NA	1.51739	1.44398	NA	NA	NA	NA	NA	NA	NA	NA	1.1849	1.14083	1.16921	1.32155	NA	NA	NA	NA	NA	NA	NA	1.26956	NA	NA	NA	NA	NA	NA	NA	NA	NA	NA	NA	1.12249	0.91028	1.13942
CNTN1_HUMAN	TDGAAPNVAPSDVGGGGGR	-0.46	0.222	0.89	0.37673	0.8	0.37673	-0.59747	-0.14547	-1.8647	-1.22492	-0.17041	-0.04376	-0.05742	-0.225885	-0.06496	-0.15616	-1.13913	-0.81517	-1.0304	-0.84585	0.05129	-0.38731	0.35284	0.6262	0.238495	0.46951	-0.900975	-0.813795	-0.61807	-0.54545	-0.48379	-0.14324	-1.59245	-0.645965	-0.62307	-0.64263	-0.4953	-0.712995	-0.0194	0.205995	-0.47483	-0.11387	-0.460835	-0.79157	-0.98506	-0.621265
CNTN1_HUMAN	AVDLIPWMEYEFR	-0.93	0.043	0.1	0.92172	0.01	0.92172	-1.57481	-1.53189	0.38924	0.09746	NA	NA	-2.35079	-1.51249	-0.7914	-1.38303	-0.18352	-0.08699	-0.73627	-1.4287	-0.47189	0.55925	NA	NA	-1.88885	-1.54722	-2.53182	-2.60884	-2.24844	-2.35687	-1.33824	-1.30993	-1.09823	-0.732805	-0.0287	-0.0795	-1.09146	-1.35946	0.24298	0.299255	0.33886	-0.12209	-0.359035	0.62264	-2.23059	-0.922155
CNTN1_HUMAN	ILALAPTFEMNPMKK	0.21	-0.035	-0.17	0.86958	0.03	0.86958	0.61228	0.63239	0.78813	0.92443	-0.16855	-0.38794	-0.11087	0.093595	0	-0.22003	-0.01799	-0.33497	-0.30382	-0.41063	0.37895	0.50374	0.05891	0.32988	0.700535	0.85898	0.204585	0.403775	-0.11108	0.11549	0.54199	0.34179	-0.24474	-0.196255	0.67517	0.41143	-0.57503	-1.0218	0.60061	0.745075	0.65577	0.72254	-0.074235	0.84176	0.24551	0.350275
CNTN1_HUMAN	WLLNEFPVFITMDK	-0.07	0.024	0.06	0.95213	0	0.95213	-0.47959	-0.56311	1.60657	1.19741	-1.89958	NA	-1.47191	-0.460875	0.44796	-0.32655	0.25222	0.66868	-0.02166	-0.4852	0.58514	1.11278	NA	NA	-0.187795	-0.1726	-0.984565	-1.48981	-1.35183	-0.6808	-0.79943	-1.02629	0.61737	1.19111	0.95118	0.85545	-0.98218	-0.655045	0.56796	0.575325	0.14331	-0.29035	-0.001605	0.88838	-0.48012	0.482265
CNTN1_HUMAN	VLEPMPSTAEISTSGAVLK	2.14	0.102	0.62	0.54128	0.38	0.54128	2.33531	2.51798	2.29645	2.58056	1.95931	1.95782	1.80228	2.06698	2.42362	2.17469	2.01	1.70677	1.81171	1.833	2.15868	2.36416	2.18697	2.36519	2.68839	2.62192	1.82756	2.09024	1.50337	2.02776	2.05909	2.19272	1.65797	1.68379	2.27786	2.25856	1.42127	1.41856	2.66187	2.71627	2.41668	2.42344	2.33684	2.13439	2.29799	2.42346
CNTN1_HUMAN	KVLEPMPSTAEISTSGAVLK	1.55	0.148	0.8	0.42839	0.64	0.42839	1.85009	1.89529	1.79622	2.00893	1.19035	1.3944	1.4342	1.73003	1.82912	1.47725	1.20533	1.66846	0.89274	1.09336	1.56508	1.75122	1.78698	1.78004	1.92207	2.30554	1.34381	1.44504	0.98919	1.50489	1.50811	1.53639	1.20679	1.21165	1.75741	1.55292	0.58333	0.875585	1.80778	2.08406	1.93738	1.82255	1.43937	1.75271	1.52338	1.73906
CNTN1_HUMAN	GMVLLCDPPYHFPDDLSYR	2.11	-0.343	-1.53	0.13289	2.35	0.13289	2.20564	2.29267	2.32633	2.55168	1.73998	1.55324	1.66173	1.80051	1.98056	2.04619	2.03679	2.10724	1.81183	1.67422	2.31872	2.59823	0.7065	0.23486	2.48194	2.67587	2.29557	1.98158	1.66767	1.84665	2.35536	2.1961	1.51888	1.96619	2.55859	2.64307	1.41359	1.53029	3.0202	3.07171	2.98496	2.69541	2.40523	2.88139	2.18678	2.43716
CNTN1_HUMAN	IFNIQLEDEGIYECEAENIR	-1.06	-0.448	-0.85	0.40501	0.72	0.40501	-1.78726	-1.14234	-1.59912	NA	NA	-1.25819	-1.12806	NA	-1.98489	NA	NA	NA	NA	NA	-0.42326	-1.36365	NA	NA	-0.319285	-1.51703	-1.1482	NA	NA	NA	NA	NA	NA	NA	NA	NA	NA	NA	0.3467	-0.482555	-1.04709	NA	-0.542355	-1.55182	-0.85951	-1.23656
CNTN1_HUMAN	GFGPIFEEQPINTIYPEESLEGK	2.24	-0.055	-0.26	0.79977	0.07	0.79977	2.28333	2.804	2.3171	2.70746	1.88797	1.99893	1.89784	2.13625	2.42861	2.3921	2.18001	2.49198	1.98795	2.02227	2.35558	2.6681	1.51839	1.32942	2.41945	2.51407	2.08148	2.15491	1.57775	1.80982	2.34682	2.371	1.63366	2.2493	2.31846	2.3121	1.66112	1.85319	2.94688	2.92549	2.73296	2.58831	2.23777	2.73896	2.04762	2.84862
CNTN1_HUMAN	STEATLSFGYLDPFPPEERPEVR	2.63	-0.093	-0.4	0.6935	0.16	0.6935	2.88184	2.89799	2.71494	2.99848	2.39126	2.40321	2.38635	2.63655	2.94677	2.86978	2.48487	2.83886	2.5919	2.7276	2.91188	3.23353	1.32128	0.55097	2.89475	3.08675	2.50163	2.33799	2.15752	2.41936	2.5666	2.59237	2.07554	2.48727	2.88098	2.97067	2.0509	2.49984	3.38833	3.49483	2.82838	2.87731	2.60326	3.1243	2.65595	3.11481
CNTN1_HUMAN	GDGPYSLVAVINSAQDAPSEAPTEVGVK	0.9	0.063	0.24	0.81145	0.06	0.81145	0.99573	1.56828	0.48369	1.01113	0.54512	0.71821	0.17436	0.760965	0.91239	0.88794	0.66394	0.98181	0.41266	0.63326	1.16828	1.42983	1.16243	1.13059	1.33719	1.69008	0.536585	0.749135	0.03138	0.55487	0.94454	0.95527	-0.40228	0.040295	1.18277	1.25372	-0.15619	0.414925	1.86094	1.9788	1.68954	1.42159	0.641385	1.34897	0.89051	1.46229
CNTN2_HUMAN	VEVLAGDLR	0.05	0.363	1.86	0.07102	3.44	0.07102	0.3264	0.52948	-0.01427	-0.07805	0.46913	0.64324	-0.71719	NA	-0.08061	-0.27931	0.05828	0.15311	-0.01692	0.06685	0.70581	0.45442	0.69596	0.891	0.305885	0.41087	-0.705545	-0.598215	0.23989	0.69391	-0.54464	-0.19301	-0.65192	NA	-0.00784	-0.47616	-0.07341	-0.227725	-0.04276	-0.070745	-0.29824	-0.78699	-0.044885	0.07603	0.43529	0.551515
CNTN2_HUMAN	GFDNHSPIAK	-2.45	0.618	1.02	0.33959	1.04	0.33959	-2.63852	NA	NA	NA	NA	NA	NA	NA	NA	NA	NA	NA	NA	NA	-1.95585	NA	-2.02412	-2.14819	-2.92277	NA	NA	NA	NA	NA	NA	NA	NA	NA	NA	NA	NA	NA	NA	NA	NA	NA	NA	NA	-3.01137	NA
CNTN2_HUMAN	GPPGPPGGVVVR	-0.92	0.504	1.91	0.06351	3.64	0.06351	-0.88561	-0.15681	-0.63438	-0.52315	-0.20305	0.02269	-1.93255	-2.45603	-1.07039	-1.01803	-0.87735	-0.82845	-1.15871	-0.82556	-0.33311	-0.1846	0.22489	0.54412	-0.717595	-0.25068	-1.88369	-2.01421	-0.47475	-0.71962	-1.41271	-0.96739	-1.74868	-2.15781	-0.88402	-0.93681	-1.80742	-1.22249	-1.29061	-1.0654	-1.19714	-1.50352	-0.880885	-0.69352	-0.26258	-0.215585
CNTN2_HUMAN	FGFLQEFSK	0.02	0.577	0.84	0.43585	0.71	0.43585	NA	NA	NA	NA	NA	NA	NA	NA	NA	NA	NA	NA	NA	NA	NA	0.51808	NA	NA	NA	NA	NA	NA	NA	NA	NA	NA	NA	NA	NA	NA	NA	NA	NA	0.242295	-0.27139	-0.39465	NA	NA	NA	NA
CNTN2_HUMAN	GGEILIPCQPR	0.15	0.236	0.99	0.32964	0.98	0.32964	0.43418	0.75189	-0.12316	0.21417	0.64095	0.63991	-0.77633	NA	-0.10366	-0.21313	-0.00372	0.03013	-0.26976	0.1105	0.45437	0.69562	0.74986	1.14046	0.203795	0.47184	NA	NA	0.29899	0.82322	NA	NA	NA	NA	-0.26054	-0.1683	-0.47411	-0.287105	-0.35937	0.102185	-0.3401	-0.5142	0.163435	-0.12263	0.36619	0.584505
CNTN2_HUMAN	VTVTPDGTLIIR	0.9	0.329	1.28	0.20709	1.64	0.20709	1.44003	1.76249	0.95156	0.66642	1.33955	1.42155	-0.06067	0.531145	0.77945	0.54697	0.47818	1.04203	0.58651	1.08259	1.22823	1.54856	1.53446	1.93808	0.878895	1.35759	0.286695	0.508185	0.96205	1.5876	0.57879	0.97162	0.3879	NA	0.50791	0.56956	0.24277	0.669465	0.37223	1.00659	0.53614	0.28515	0.445985	0.86096	1.44393	1.79541
CNTN2_HUMAN	IIVQAQPEWLK	1.09	0.247	1.5	0.14096	2.25	0.14096	1.32803	1.48301	1.19531	1.11797	1.2269	1.36065	1.16609	1.25232	0.79745	0.67192	1.14899	1.25377	0.90071	1.20138	1.46489	1.43992	1.51372	1.80734	0.816725	1.12854	0.152885	0.497715	0.7794	1.35057	0.74036	0.86027	0.72314	1.00367	0.8043	0.6959	0.99999	1.069	0.80755	1.0469	1.04597	1.07771	1.31812	1.20716	1.52016	1.64394
CNTN2_HUMAN	FAQLNLAAEDTR	-0.21	0.476	1.29	0.20343	1.67	0.20343	0.65637	0.82127	-0.40562	0.07303	0.23048	0.55486	-2.53165	NA	0.06305	0.0286	-0.40227	0.22412	-0.21032	0.2879	0.40144	0.45277	0.5386	1.27047	0.263865	-0.51556	-0.875695	-0.307755	0.21889	-0.79098	-0.54495	-1.73702	-1.39935	-1.42893	-0.29526	-0.37534	-0.71867	-0.346135	-0.38801	0.243675	-1.05275	-1.05948	-0.292765	-0.16522	0.53119	0.970945
CNTN2_HUMAN	YTCFAENFMGK	-0.83	0.559	2.46	0.0197	6.06	0.0197	NA	-0.37549	-0.66924	-0.4713	NA	-0.72557	NA	NA	-0.86629	-1.06147	-1.06141	-0.55329	NA	-0.81656	-0.2335	-0.06318	-0.46898	-0.32464	-0.545445	-0.05864	-1.469	-1.36241	-0.40869	-0.00716	NA	-1.61858	-1.76985	-1.34193	-0.62877	NA	NA	NA	-1.14375	-0.973525	-1.53139	-1.40366	-1.15972	-0.92761	NA	NA
CNTN2_HUMAN	VISDTEADIGSNLR	0.8	0.212	0.61	0.55276	0.37	0.55276	0.75987	0.8278	NA	NA	0.72044	0.74977	NA	NA	NA	NA	NA	NA	NA	NA	NA	NA	1.00174	1.28474	NA	NA	NA	NA	NA	1.06993	NA	NA	0.39821	NA	NA	NA	NA	NA	NA	NA	NA	NA	NA	NA	0.49171	0.664485
CNTN2_HUMAN	ETIGDLTILNAQLR	-0.35	0.476	2.45	0.01852	6.01	0.01852	0.25545	0.51576	-0.44105	-0.08857	0.49462	0.48796	-1.2722	-1.02801	-0.57151	-0.45778	-0.4127	-0.0762	-0.47645	-0.47391	0.42456	0.19734	0.30704	0.41609	-0.102725	0.10801	-1.21968	-1.08689	-0.09183	0.0598	-0.74976	-0.8779	-0.69034	-0.719615	-0.39893	-0.3402	-0.94833	-1.16189	-0.47917	-0.144985	-1.09341	-1.10089	-0.692645	-0.60994	0.33365	0.295795
CNTN2_HUMAN	YTCMAQTVVDSASK	-0.35	0.526	2.8	0.00797	7.86	0.00797	0.31322	0.18502	-0.13606	-0.08453	-0.29552	-0.16283	NA	NA	-0.3851	-0.61964	-0.41106	-0.19712	-0.80396	-0.54232	0.27818	0.32095	0.49587	0.63349	0.002385	0.15605	-1.38129	-0.912825	-0.13493	0.04339	-0.87169	NA	-1.20522	-0.772005	-0.41832	-0.3897	-0.93182	-0.884365	-0.38234	-0.476005	-0.77498	-0.81986	-0.507915	-0.59376	NA	0.233305
CNTN2_HUMAN	HQLVGGNLVIMNPTK	-0.41	0.538	0.89	0.38134	0.79	0.38134	0.08078	-0.20859	0.01894	0.18792	-0.60792	-0.85516	-0.39996	NA	NA	-0.27685	-0.33403	-0.40186	-0.57706	-0.59698	0.79828	0.47524	-0.10435	-0.28079	0.103345	0.20834	NA	NA	0.10638	NA	NA	NA	-1.14317	-4.9978	-0.33894	-0.31559	-0.95797	NA	-0.13738	-0.261875	-0.23862	-1.0723	NA	-0.22107	-0.30763	-0.178815
CNTN2_HUMAN	VIASNILGTGEPSGPSSK	2.01	0.192	0.55	0.58343	0.31	0.58343	2.71472	2.47556	2.86932	2.87327	1.7143	1.55509	2.4695	2.38315	2.15553	1.97881	1.65677	1.61756	1.49035	1.74897	1.90809	1.98277	2.09963	2.24837	1.96317	2.27476	2.11735	2.18998	1.6485	1.93945	1.76258	1.62711	1.11127	1.27961	2.43215	2.35477	1.20704	-1.17203	2.34995	2.29725	2.71978	2.69342	2.52316	2.54897	2.24734	2.46056
CNTN2_HUMAN	EYQNGDGFGYLLSFR	-2.11	0.75	1.21	0.25322	1.46	0.25322	NA	NA	NA	NA	-2.53102	NA	NA	NA	NA	NA	NA	NA	NA	NA	-1.38146	NA	NA	NA	-1.29767	NA	NA	-3.53069	-2.46725	-2.33155	-2.81869	NA	NA	NA	NA	NA	NA	NA	NA	NA	NA	NA	NA	NA	-1.70934	-0.923795
CNTN2_HUMAN	WLLNEFPNFIPTDGR	-0.94	0.273	0.41	0.69035	0.17	0.69035	-1.49848	-0.91266	NA	NA	NA	NA	NA	NA	NA	NA	NA	NA	NA	NA	-0.21072	NA	NA	NA	NA	NA	NA	NA	-1.17528	-0.74332	-1.58613	NA	-0.51403	NA	NA	NA	-1.20244	NA	NA	NA	NA	NA	NA	NA	-1.32347	-0.239715
CNTN2_HUMAN	LSLEDSGMYQCVAENK	-1.04	0.188	0.51	0.61887	0.26	0.61887	-1.35685	-0.49044	NA	NA	-1.27043	NA	NA	NA	-1.57081	NA	NA	NA	NA	NA	-0.94412	-0.78682	-0.68695	-0.54621	-1.05869	-0.75185	NA	NA	-1.32123	-0.77829	NA	NA	NA	NA	-1.50521	NA	NA	NA	-1.38609	-1.2749	NA	NA	NA	NA	-1.21117	-0.684895
CNTN2_HUMAN	RGDGPESLTALVYSAEEEPR	-0.09	0.435	1.93	0.0617	3.72	0.0617	0.77001	0.84716	NA	0.17667	0.41616	0.47565	-0.67937	-0.490915	-0.57188	-0.58442	-0.00975	-0.12861	-0.06675	-0.11075	0.35771	0.51662	0.14733	0.22688	-0.220425	0.34825	-1.41772	NA	-0.13295	0.46785	-0.67036	-0.50724	NA	-0.604655	-0.43332	-0.32215	-0.72366	-0.442105	-0.18077	0.099155	NA	NA	-0.526745	-0.21314	0.2944	0.701845
CNTN2_HUMAN	AQDAGVYQCLASNPVGTVVSR	-0.04	0.207	0.58	0.5674	0.34	0.5674	0.32582	NA	-0.2308	NA	NA	NA	NA	NA	NA	NA	-0.24273	0.15173	-0.55388	NA	NA	0.63793	NA	NA	-0.106855	0.56248	NA	NA	0.05131	0.64632	NA	NA	-0.99342	-0.477795	-0.37047	NA	NA	NA	NA	NA	-0.19932	NA	NA	-0.17063	0.26162	NA
CNTN2_HUMAN	NWIEIPVPEDIGHALVQIR	0.34	-0.151	-0.41	0.68596	0.17	0.68596	0.87232	0.5561	1.47947	1.36246	-0.3	-0.73435	-0.91595	-0.769255	0.61681	0.41259	0.89909	1.01908	0.8498	0.57513	1.47659	1.62911	-3.06914	NA	0.104825	0.34505	-0.568365	-1.29314	0.00197	0.29417	-1.07279	-1.01562	0.86329	1.0494	0.99885	0.75957	0.25656	0.175815	0.77326	0.735715	0.67984	0.33636	0.893725	1.28969	0.58189	1.18125
CNTN2_HUMAN	TNPANIEGNAETAQVLGLTPWMDYEFR	-1.56	0.333	0.82	0.41737	0.68	0.41737	-1.41648	NA	-0.96418	-0.81335	NA	NA	NA	-2.92233	-1.93589	NA	-1.41399	-0.76444	-1.56413	-2.04828	-0.86992	-0.53917	NA	NA	-1.71877	-1.29877	NA	NA	-2.098	-1.83948	-3.64378	NA	-1.91274	-1.17046	-1.54594	-1.28966	NA	-2.29763	-1.40723	-1.14549	-2.34991	NA	-2.00346	-0.89979	-1.40819	-0.443345
CNTP2_HUMAN	SPTPLNDDQWHR	-0.39	0.003	0.02	0.98601	0	0.98601	-0.21284	-0.48533	NA	-0.82018	-0.48371	-0.65046	-0.35417	-0.193295	-0.38386	NA	-0.0646	0.03181	-0.08228	-0.27205	-0.29065	-0.1263	-0.13063	-0.19334	-1.15566	-1.02151	-1.26348	-1.13251	-0.70112	-0.87121	0.07045	0.1002	-0.15109	0.321095	NA	NA	-0.18742	-0.205175	-0.5693	-0.233055	-0.39107	-0.23765	-0.105795	-0.20174	-0.69165	-0.826755
CNTP4_HUMAN	DGAGGWSPLVSNK	-0.38	NA	NA	NA	NA	NA	-0.37959	NA	NA	NA	NA	NA	NA	NA	NA	NA	NA	NA	NA	NA	NA	NA	NA	NA	NA	NA	NA	NA	NA	NA	NA	NA	NA	NA	NA	NA	NA	NA	NA	NA	NA	NA	NA	NA	NA	NA
CNTP4_HUMAN	AQVTPEVQPGCR	-2.83	1.275	1.57	0.16465	2.46	0.16465	NA	NA	NA	NA	NA	NA	NA	NA	NA	NA	NA	NA	NA	NA	NA	NA	-3.21269	-2.65607	-2.36508	-2.07848	NA	NA	NA	NA	NA	NA	NA	NA	NA	NA	NA	NA	-3.85346	NA	NA	NA	NA	NA	NA	NA
CO1A1_HUMAN	SLSQQIENIR	-0.34	1.396	1.32	0.19949	1.75	0.19949	0.5997	0.86379	NA	NA	0.29442	0.42478	-3.62213	0.644025	NA	NA	0.09087	NA	NA	0.13316	NA	0.61643	0.9595	1.09212	NA	0.75838	-4.74615	NA	NA	0.76856	NA	0.44933	NA	NA	NA	NA	NA	NA	-3.46185	-3.80852	-0.24895	0.00682	NA	NA	0.37898	0.686225
CO1A1_HUMAN	VLCDDVICDETK	0.85	0.043	0.11	0.91301	0.01	0.91301	0.83404	NA	0.02679	-0.23023	1.59863	1.27014	1.29132	1.53975	0.40541	-0.05297	1.15967	1.98272	1.12767	0.7118	0.75174	0.86957	1.21866	1.18085	0.334125	0.53061	0.149495	-0.009435	0.53198	0.5705	1.30455	0.82047	1.45729	1.26946	-1.0972	-0.33772	1.23138	1.26662	-0.03867	0.801845	-0.23898	1.48274	3.54354	3.3797	0.19137	0.250655
CO1A1_HUMAN	STGGISVPGPMGPSGPR	-0.77	1.663	2.33	0.06312	5.45	0.06312	NA	NA	NA	-0.24294	NA	NA	NA	NA	NA	NA	NA	NA	NA	NA	NA	NA	NA	NA	NA	0.37226	NA	NA	NA	NA	NA	NA	NA	NA	NA	-2.32286	NA	NA	NA	NA	NA	-0.87326	NA	NA	NA	NA
CO1A1_HUMAN	SGEYWIDPNQGCNLDAIK	-1.34	0.274	0.59	0.56605	0.35	0.56605	-0.58657	-0.77398	NA	NA	NA	-2.43134	NA	NA	NA	NA	NA	-1.56723	NA	NA	-0.93091	NA	-1.07341	NA	NA	NA	NA	NA	NA	NA	NA	NA	NA	NA	NA	NA	-0.92632	NA	NA	NA	NA	-2.26698	NA	-2.38443	-0.68938	-1.07553
CO1A2_HUMAN	GVGLGPGPMGLMGPR	-2.84	NA	NA	NA	NA	NA	NA	NA	-2.91587	-2.76829	NA	NA	NA	NA	NA	NA	NA	NA	NA	NA	NA	NA	NA	NA	NA	NA	NA	NA	NA	NA	NA	NA	NA	NA	NA	NA	NA	NA	NA	NA	NA	NA	NA	NA	NA	NA
CO1A2_HUMAN	GETGPSGPVGPAGAVGPR	-4.12	0.424	0.7	0.50415	0.49	0.50415	NA	NA	NA	NA	NA	NA	NA	NA	-4.51573	NA	NA	NA	NA	NA	-3.62886	NA	-3.80737	NA	NA	-4.19649	NA	NA	NA	NA	NA	NA	NA	NA	NA	NA	-3.94939	-3.40014	NA	NA	NA	NA	NA	-5.32196	NA	NA
CO2_HUMAN	DFHINLFR	-2.84	-0.003	-0.01	0.99397	0	0.99397	NA	-2.45963	-4.6489	NA	NA	NA	NA	-2.94209	-2.99463	NA	-1.92881	-2.189	-2.05111	-2.19769	-2.95717	-3.38184	NA	NA	-3.28926	NA	-2.39383	-2.46076	NA	-4.63532	-2.11326	-1.92272	-2.9203	-3.10057	-2.58733	-2.97933	-1.49434	-1.79954	NA	NA	-3.86262	-3.9706	-3.36918	-3.09846	NA	NA
CO2_HUMAN	HAFILQDTK	-1.03	0.241	0.82	0.4166	0.67	0.4166	-0.99203	-0.77968	-2.22485	-1.54081	-1.00465	-0.89552	-0.78156	-2.1149	-0.84747	-0.86921	-0.6651	-0.57061	-0.56627	-0.44128	-0.59747	-1.06057	-0.96028	-0.64852	-0.582635	-0.36476	-0.753695	-0.903945	-1.27377	-1.80779	-0.84742	-0.38926	-2.02002	-1.87186	-0.71862	-0.77543	-0.64272	0.131065	-1.90847	-1.35435	-1.96186	-1.58117	-0.718045	-0.82971	NA	-1.59004
CO2_HUMAN	HAIILLTDGK	1.11	-0.023	-0.14	0.89069	0.02	0.89069	1.47072	1.25687	1.02064	1.03665	0.95381	1.1692	0.76106	0.834375	1.26375	1.02619	0.86695	1.02022	0.63904	0.71066	0.94837	1.05002	1.50347	1.8674	1.23162	1.33453	1.35779	1.42593	0.33651	0.78343	1.21019	1.24122	0.65179	0.400655	1.55874	1.33647	0.46458	0.525725	1.51678	1.42763	1.54802	1.28215	1.59109	1.56145	0.99293	1.21784
CO2_HUMAN	VLMSVLNDNSR	-1.21	0.158	0.48	0.6351	0.23	0.6351	NA	-0.84302	-1.7127	-1.59899	NA	-1.35409	NA	NA	-1.07841	-1.38497	NA	NA	NA	NA	-1.19141	-1.41911	-1.09575	-0.7569	NA	-0.70952	-1.07988	-0.885475	NA	-2.0039	-0.97793	NA	NA	NA	NA	NA	NA	NA	NA	NA	NA	NA	NA	NA	NA	NA
CO2_HUMAN	SSGQWQTPGATR	-1.58	0.661	1.1	0.28554	1.2	0.28554	NA	-0.9856	NA	NA	-1.03711	-0.45703	NA	NA	-2.17109	NA	NA	NA	NA	NA	-2.02338	-2.0472	-1.14158	0.45156	NA	-1.4503	-1.53229	-0.632725	NA	-0.51172	-2.14404	-2.33613	NA	-2.55708	NA	-2.41702	-2.58205	-1.23995	NA	NA	NA	NA	NA	-3.77367	NA	-1.07005
CO2_HUMAN	RNDYLDIYAIGVGK	-3.48	-1.706	-3.12	0.00853	9.74	0.00853	NA	NA	NA	NA	-3.07207	-3.15116	-3.54945	-3.85975	NA	NA	NA	NA	-4.77641	NA	-4.14539	NA	-3.66189	-3.8252	-3.88108	NA	NA	NA	NA	NA	NA	NA	NA	NA	NA	NA	-2.13959	-2.20162	NA	NA	NA	NA	NA	NA	NA	NA
CO2_HUMAN	NQGILEFYGDDIALLK	-1.08	0.091	0.2	0.84158	0.04	0.84158	-2.08411	-1.57245	-0.23349	-0.36029	-1.34214	-1.05732	-1.64247	-0.937235	-0.78194	-1.01518	0.00411	-0.08591	-0.26822	-1.03192	-0.28852	-0.08602	NA	NA	-2.94212	-2.77391	-2.93947	-3.09634	-2.14396	-1.75882	-1.53785	-1.53214	-0.76651	-1.03463	-1.11698	-0.97763	-0.75721	-0.903035	-0.03205	-0.273585	0.49424	0.11486	-0.011055	0.74745	-3.51468	-1.34448
CO2_HUMAN	ECQGNGVWSGTEPICR	-1.73	0.882	1.01	0.34232	1.01	0.34232	NA	-1.54467	NA	NA	NA	NA	NA	NA	NA	NA	-2.12859	-1.10574	NA	NA	NA	-1.74138	NA	-2.20214	NA	-0.89409	NA	NA	NA	NA	NA	NA	NA	-2.48181	NA	NA	NA	NA	NA	NA	NA	NA	NA	NA	NA	NA
CO2_HUMAN	KNQGILEFYGDDIALLK	-1.01	0.095	0.2	0.84908	0.04	0.84908	NA	-0.97919	NA	NA	NA	NA	NA	NA	NA	-1.34613	-0.9189	-0.605	NA	NA	NA	NA	NA	NA	NA	NA	NA	NA	NA	NA	NA	NA	NA	NA	-0.88726	NA	NA	NA	NA	-1.34345	NA	NA	NA	NA	NA	NA
CO2_HUMAN	GALISDQWVLTAAHCFR	0.14	-0.226	-1.03	0.30989	1.06	0.30989	0.02291	0.37448	NA	0.03751	-0.15129	-0.09799	-0.23594	-0.164305	0.06163	0.19853	0.84346	0.94448	0.64834	0.27075	0.09056	0.27733	-1.56836	NA	-0.156865	-0.16649	0.476075	0.204625	-0.82944	-0.78994	0.27821	0.18743	-0.1352	0.200635	0.7392	0.77643	0.67269	0.642695	0.0022	-0.144645	0.31808	NA	0.453345	0.68478	NA	NA
CO3_HUMAN	GVFVLNKK	1.13	-0.221	-1.03	0.30786	1.07	0.30786	0.44578	0.11168	1.10843	0.65853	1.13087	0.86493	1.1827	0.697965	0.47007	0.56225	1.33553	1.14863	1.54839	NA	1.06602	0.92922	1.64801	1.38126	1.53015	1.30607	1.9568	1.79733	1.50383	0.98543	1.09208	0.85196	1.85094	1.63532	1.35476	1.01985	1.6128	1.5207	0.81529	0.681485	1.10711	0.80866	0.999205	1.55545	1.15859	0.706465
CO3_HUMAN	GLEVTITAR	-0.78	-0.139	-0.24	0.813	0.06	0.813	-1.28747	-2.34624	NA	NA	-0.73747	-1.41898	-0.81016	-1.72713	NA	NA	0.39542	NA	0.37858	-0.14474	-0.21264	-1.66068	-0.61757	-1.65091	0.081015	-0.81033	0.387395	-0.099785	-0.16733	-0.72792	-1.01783	-1.18844	-1.58357	-1.22593	-0.23988	-2.26782	NA	-1.54798	0.42571	NA	NA	NA	0.701185	NA	-0.49612	-1.69047
CO3_HUMAN	TGLQEVEVK	3.73	-0.14	-0.71	0.48408	0.5	0.48408	2.63791	3.27942	3.24624	3.57339	3.64736	3.85458	3.51776	3.16366	3.54929	3.52546	3.74353	3.94003	3.76092	3.94319	3.59794	3.54098	4.0242	4.36974	3.92102	4.33632	4.18081	4.31424	3.99963	3.81394	3.29155	3.64181	3.71887	4.06979	3.47981	3.6158	3.82183	4.31546	3.52635	3.8508	3.56347	3.71777	4.07013	3.8516	3.43381	3.68581
CO3_HUMAN	FISLGEACK	3.45	-0.134	-0.85	0.39966	0.72	0.39966	2.91177	3.05087	2.7904	3.08008	3.23806	3.26825	3.29655	3.3647	3.35516	3.19323	3.78792	3.99705	3.47281	3.69026	3.33659	3.31332	3.56595	3.77445	3.47193	3.71496	3.90883	4.05816	3.5827	3.95989	3.11502	3.33639	4.01808	3.98277	3.44888	3.24265	3.81242	4.00652	3.21648	3.27497	3.1698	3.00559	3.42758	3.35251	3.14907	3.28143
CO3_HUMAN	RQGALELIK	2.19	-0.185	-0.95	0.34837	0.9	0.34837	1.50602	1.272	2.04414	1.89999	2.02357	1.95336	2.28651	1.79659	1.7499	1.91971	2.52268	2.61859	2.45999	2.28368	2.12226	2.08739	2.50374	2.03474	2.49824	2.45585	2.93079	2.45054	2.54871	1.84501	2.14188	2.01079	2.44907	2.89404	2.2862	2.24214	2.34967	2.70636	2.15612	2.10984	2.08855	2.13852	2.35446	2.46355	1.92504	1.6415
CO3_HUMAN	ISLPESLKR	-0.88	-0.348	-1.55	0.12997	2.41	0.12997	-1.73458	-1.65822	NA	NA	-1.33736	-1.02936	-1.57623	-1.1765	-1.17706	-1.22157	-0.26351	-0.0344	-0.58952	-0.73535	-2.07577	-1.51931	-0.62671	-0.55511	-0.943875	-0.70448	-0.144855	-0.067435	-0.99971	-0.6935	NA	-1.16118	-0.25187	NA	-1.01416	NA	-0.24776	-0.196555	NA	-1.09329	NA	NA	NA	-0.9076	-0.78239	-0.867455
CO3_HUMAN	DSCVGSLVVK	2.98	-0.142	-0.5	0.61633	0.25	0.61633	2.42836	2.67537	1.93352	2.41069	3.08382	3.22652	2.57913	2.6757	2.83406	2.61219	2.83443	3.27904	2.68022	2.98098	2.97403	2.78894	3.41796	3.7688	3.28931	3.67556	3.61698	3.99878	3.4926	3.76198	2.53786	2.84832	2.48067	3.2418	2.71924	2.843	3.16025	3.51146	2.9568	3.21301	2.90501	2.78351	3.35438	1.82891	2.72116	3.00603
CO3_HUMAN	ADIGCTPGSGK	0.57	0.069	0.24	0.81094	0.06	0.81094	-1.03942	-0.57705	0.22426	0.43685	0.83398	0.78396	0.57687	0.430805	0.77798	0.29296	0.62393	1.41369	0.64446	0.90018	0.8209	0.43738	1.0323	1.64815	0.690195	1.14872	0.389955	1.10512	1.16839	1.45092	-0.72536	-0.31352	1.13531	1.27424	0.27328	0.38752	1.03954	1.25961	0.29196	0.581175	0.32361	0.43297	1.19141	0.59842	-0.74228	-0.405905
CO3_HUMAN	GYTQQLAFR	3.26	0.017	0.09	0.92531	0.01	0.92531	2.97777	3.08495	2.65994	2.84464	3.70756	3.65783	3.1312	3.2411	2.92004	2.68978	3.07756	3.27197	3.48371	3.51438	3.43767	3.44835	3.56757	3.83095	3.27848	3.45018	3.10428	3.30561	3.01842	3.55448	3.33514	3.52259	3.8188	3.78796	2.53418	2.36758	3.77291	3.74204	2.4507	2.54738	2.9298	2.69324	3.29878	3.56076	3.83192	3.75852
CO3_HUMAN	NTLIIYLDK	1.94	-0.27	-1.59	0.11877	2.54	0.11877	0.84157	1.37302	2.08245	2.3397	1.27065	1.31714	1.61458	1.70074	1.88281	1.68814	2.24683	2.06816	2.06014	2.21572	1.83276	1.89808	1.52171	1.69585	2.1675	2.23871	2.43301	2.46742	2.1143	2.25567	1.18164	1.55651	2.62245	2.77224	2.15926	2.02129	2.3283	2.31696	1.98623	2.01058	1.6064	1.56034	2.04258	2.02518	1.95547	2.03783
CO3_HUMAN	VLLDGVQNPR	2.59	0.141	0.59	0.5587	0.35	0.5587	2.44568	2.8382	2.46975	2.55716	NA	NA	2.8542	2.85555	1.80435	1.79146	3.11795	3.39452	3.11058	3.26938	2.98811	2.7487	2.2693	2.58814	2.29029	2.54345	3.66247	3.80761	2.35618	2.50891	1.69231	1.7672	1.79336	2.28914	1.78106	1.90194	3.28887	3.55896	1.96087	2.10193	1.69401	1.75651	3.33561	3.27197	2.88912	3.02644
CO3_HUMAN	LCRDELCR	-0.83	-0.071	-0.26	0.79533	0.07	0.79533	NA	NA	-1.19507	-0.8946	NA	NA	-1.3171	-1.27998	-0.79912	-1.13355	-1.15985	-0.58888	-1.37843	-0.93753	-1.46789	-0.63296	-0.75142	-0.79837	-0.193275	0.23996	-0.455875	-0.097015	-0.77504	-0.22836	NA	-1.84363	-0.25247	-0.205685	-0.77567	-0.89969	NA	-0.590395	NA	-0.600605	NA	-1.20419	NA	-0.93761	-1.47675	-1.10518
CO3_HUMAN	FYYIYNEK	-1.77	-0.29	-0.75	0.46382	0.56	0.46382	NA	NA	NA	-3.10402	NA	NA	NA	NA	-2.63014	NA	NA	-1.79814	NA	NA	NA	NA	-1.24129	-0.81708	-1.65678	-1.59073	-1.38796	-1.10536	NA	NA	NA	NA	NA	NA	NA	NA	-1.54761	NA	-2.25837	-2.04228	NA	NA	-1.50693	NA	NA	-2.15794
CO3_HUMAN	HQQTVTIPPK	-0.5	-0.151	-0.75	0.45471	0.57	0.45471	-1.72573	-1.43846	-0.68867	-0.41197	-0.93449	-1.10233	-0.37442	-0.614345	-0.74629	-0.44173	-0.20482	-0.11154	-0.44186	-0.36711	-0.7356	-0.95668	-0.2689	0.0017	0.016285	0.01133	0.104035	0.118815	-0.38548	-0.15704	-1.36103	-1.30773	0.03159	0.061955	-0.83547	-0.62252	-0.23762	0.271815	-0.66644	-0.338045	-0.40573	-0.28642	-0.038355	-0.05683	-1.16673	-1.2313
CO3_HUMAN	QPSSAFAAFVK	2.48	-0.256	-1.62	0.11235	2.63	0.11235	1.69998	1.87846	2.23395	2.2735	2.11419	2.13031	2.07954	2.26467	2.21767	1.98171	2.7574	2.99659	2.67719	2.66345	2.06966	2.18236	2.64595	2.9361	2.46317	2.78924	3.0539	3.11876	2.59072	2.92715	2.10604	2.25499	3.18498	3.10746	2.44742	2.47941	2.94561	2.92881	2.32426	2.48578	2.35406	2.4146	2.40726	2.50131	2.20835	2.33397
CO3_HUMAN	FISLGEACKK	-0.75	-0.398	-0.96	0.35095	0.92	0.35095	NA	-1.64344	NA	NA	-1.00892	NA	-0.62499	-1.5715	NA	NA	NA	NA	NA	NA	NA	NA	-0.51416	NA	NA	-0.76159	0.073885	-0.726705	NA	-1.57107	-0.67279	-0.48705	NA	NA	-0.49158	-0.45142	NA	NA	NA	NA	NA	-0.5353	NA	-0.21336	NA	NA
CO3_HUMAN	DFDFVPPVVR	3.2	-0.293	-1.9	0.06479	3.6	0.06479	2.61258	2.44009	3.01554	3.1083	2.83446	2.7912	2.49931	2.91163	2.84402	2.80576	3.4353	3.59449	3.35005	3.3096	2.98371	3.11809	3.42774	3.63011	3.15569	3.30082	3.71446	3.86172	3.18313	3.50636	2.92232	3.02425	3.68984	3.91294	3.24158	3.2216	3.62661	3.49782	3.26043	3.36137	3.19203	3.11466	3.13431	3.49478	3.06771	2.99449
CO3_HUMAN	YYTYLIMNK	3.51	-0.318	-0.38	0.70665	0.14	0.70665	3.06913	2.92764	3.39693	3.47387	NA	-0.73154	NA	3.55469	3.60964	3.35616	3.93539	4.17997	4.02711	3.97978	NA	3.68701	NA	3.84106	3.97492	4.30516	4.27074	4.25753	3.73019	4.31606	NA	3.49075	4.3183	4.40609	3.68352	3.78134	-1.68061	4.46091	3.62853	3.68987	3.39229	3.46851	3.81994	3.92844	3.6297	3.67911
CO3_HUMAN	IHWESASLLR	3.45	-0.575	-0.56	0.60303	0.31	0.60303	NA	NA	NA	NA	NA	NA	NA	NA	NA	NA	NA	NA	3.07049	NA	NA	NA	NA	NA	NA	NA	NA	NA	NA	NA	NA	NA	3.93021	3.36123	NA	NA	NA	NA	NA	NA	NA	NA	NA	NA	NA	NA
CO3_HUMAN	VTIKPAPETEK	1.37	-0.101	-0.52	0.60262	0.28	0.60262	0.55008	0.75625	1.52052	1.27009	0.83636	0.61904	1.47074	1.47918	1.23516	1.00224	1.68824	1.99845	1.51595	1.56178	0.86411	1.2219	1.77963	1.5473	1.66833	1.74088	1.63413	1.74506	1.40362	1.8008	0.67781	0.82098	2.50177	2.20721	1.33909	1.21588	1.89057	1.72853	1.26855	1.1771	1.13163	1.01746	1.2304	1.4772	0.8184	1.25774
CO3_HUMAN	QPVPGQQMTLK	1.69	-0.156	-0.73	0.4678	0.54	0.4678	0.63063	1.11429	1.25214	1.55197	1.36202	1.48976	1.50291	0.586245	1.51721	1.46817	1.87593	1.94871	1.72154	1.8249	1.62279	1.50447	2.15953	2.30876	2.31264	2.54315	2.42197	2.30145	2.02568	1.56218	1.22907	1.43008	1.75968	1.68335	1.59877	1.6543	1.73424	2.28129	1.677	1.89762	1.5605	1.63055	1.99524	1.87913	1.47767	1.61224
CO3_HUMAN	AELQCPQPAAR	0.48	-0.106	-0.2	0.84598	0.04	0.84598	2.58738	2.41704	-1.51619	-1.21305	0.75237	0.66679	0.68531	0.953465	-0.82323	0.65967	1.17644	1.25967	1.69367	1.407	-0.29415	-0.98393	-1.2318	-0.85016	0.669965	0.59911	2.80442	2.37904	-0.32282	-0.04181	2.381	2.22018	1.40505	1.07529	-1.56569	-1.68942	1.83948	1.63245	-1.50887	-0.013325	-0.32222	-1.91859	-1.00856	-1.10299	2.09344	2.40369
CO3_HUMAN	KVLLDGVQNPR	1.02	0.101	0.39	0.70136	0.15	0.70136	0.65499	0.99352	1.32776	1.41903	NA	NA	1.43935	0.925275	0.03069	0.18095	1.81716	2.03235	1.80997	1.84498	1.1813	1.46847	0.48582	0.56107	0.467735	0.61072	2.13551	2.24275	0.36543	-0.11108	-1e-05	0.14215	0.99022	0.955625	0.44272	0.51693	1.89668	2.17532	0.21749	0.382535	0.49333	0.52539	1.56149	1.84636	1.28606	1.30445
CO3_HUMAN	FYHPEKEDGK	-1	-0.288	-1.04	0.30635	1.08	0.30635	-2.39493	-2.0956	NA	NA	-1.96578	-2.38146	-0.70507	-0.875755	-1.12632	-1.2479	-0.23597	0.02149	-0.65838	-0.59336	-1.73943	-1.18232	-0.91782	-1.19734	-0.721545	-0.85413	-0.652775	-0.604945	-1.02551	-1.03106	NA	-1.82667	0.59483	0.413905	NA	NA	-0.25521	-0.316525	NA	-1.19442	-0.9252	-0.88723	-0.920525	NA	-1.85559	-1.48748
CO3_HUMAN	NTMILEICTR	1.12	-0.393	-2.11	0.04083	4.46	0.04083	0.25247	0.20496	1.16136	1.11092	0.68343	0.50932	0.78752	0.465285	1.19038	0.92598	1.3895	1.47467	1.11162	1.2775	1.0311	0.78875	0.54395	0.40802	1.59831	1.52119	1.98811	1.77283	1.64083	1.58984	0.42832	0.58599	2.17466	2.03191	1.30848	1.00855	1.52679	1.49459	1.29523	1.22877	0.69396	0.82589	1.49601	1.01091	1.12075	1.0754
CO3_HUMAN	QELSEAEQATR	1.4	-0.032	-0.14	0.89256	0.02	0.89256	0.53102	0.65009	0.69294	0.99726	1.46475	1.46788	1.43594	1.56879	1.48669	1.09773	1.33055	1.98132	1.35151	1.73357	1.31657	1.11393	1.79741	2.21704	1.41917	1.97551	1.4258	1.85007	1.80162	2.14613	0.74406	0.94299	1.83259	2.2752	1.03488	1.0967	1.59596	2.03002	0.93409	1.20169	0.87805	0.99501	1.42163	1.23982	NA	NA
CO3_HUMAN	ENEGFTVTAEGK	1.59	0.008	0.04	0.96669	0	0.96669	0.58328	1.13819	1.02075	1.57606	1.24224	1.29098	1.66107	1.34316	1.74276	1.70669	1.96837	2.21283	1.71446	1.88536	1.43573	1.45727	1.80438	2.03339	1.87268	2.16617	1.82007	2.03236	1.89175	1.71253	0.95883	1.17511	2.26417	2.35695	1.51349	1.54415	1.96858	2.30253	1.27076	1.48542	0.83158	1.06054	1.61908	1.41973	1.08002	1.38
CO3_HUMAN	SGSDEVQVGQQR	2.14	0.098	0.36	0.72358	0.13	0.72358	0.68094	1.33123	1.66022	2.10313	2.03223	2.07885	2.32166	2.42596	2.26206	1.99948	2.31651	2.98991	2.17201	2.58912	2.2223	2.09279	2.50522	3.04544	2.28346	2.70015	1.93295	2.55354	2.57068	2.89556	1.13628	1.58445	2.85632	3.22525	1.93109	1.98734	2.50471	2.79894	1.5078	2.08796	1.67054	1.88695	2.33804	1.95007	1.04637	1.39193
CO3_HUMAN	CAEENCFIQK	-0.02	-0.005	-0.02	0.9845	0	0.9845	-1.60328	-0.87567	-0.27082	0.3008	-0.1897	-0.08461	-0.19774	-0.478375	0.14227	0.11365	0.03761	0.48162	-0.02874	0.14271	0.21739	-0.39525	0.21155	0.57988	0.577105	0.82423	0.503625	0.586755	0.29461	0.14458	-1.09872	-0.98656	0.40336	0.840795	0.07424	0.25605	0.22778	0.634105	-0.09337	0.312955	-0.56772	-0.30837	0.168265	-0.19415	-1.12994	-0.460285
CO3_HUMAN	ACEPGVDYVYK	3.69	-0.075	-0.4	0.69138	0.16	0.69138	3.11226	3.32841	3.11841	3.34112	3.55818	3.53909	3.47626	3.8297	3.53796	3.24851	3.84549	4.10095	3.70782	3.75522	3.51441	3.5977	4.10742	4.38684	3.69515	4.16623	3.98852	4.27729	4.05318	4.45267	3.24236	3.42462	4.1557	4.40287	3.35587	3.42728	4.24643	4.30738	3.35086	3.48685	3.13779	3.12923	3.47261	3.44165	3.39052	3.71965
CO3_HUMAN	APSTWLTAYVVK	-0.68	-0.154	-0.91	0.36849	0.83	0.36849	-0.54166	-0.9733	-0.57878	-0.5876	-1.1176	NA	-0.59629	NA	NA	-1.24616	-1.04629	-1.23981	-0.5235	-0.81441	-0.64846	-0.50208	-0.73534	NA	-0.379665	-0.32713	NA	-0.164995	-0.30633	-0.06715	-0.75404	-0.74765	-0.79985	-0.713045	-1.01667	-0.99297	-0.44269	-0.673685	-0.49272	-0.378065	-1.17041	-1.52941	-0.298145	-0.24034	-0.79832	-0.528955
CO3_HUMAN	EVVADSVWVDVK	1.41	-0.121	-0.58	0.5664	0.33	0.5664	1.78105	NA	0.36605	0.07763	1.74104	1.49523	1.30984	NA	1.1007	0.89709	1.44927	1.11603	1.54201	1.48886	1.76789	NA	1.43914	1.32465	2.07632	1.72637	2.29319	2.20438	1.74703	1.71986	NA	1.29955	1.54711	1.30482	1.15327	0.86465	1.74888	1.58974	1.64358	1.3756	0.69069	0.73341	1.7686	1.19415	NA	1.85197
CO3_HUMAN	TIYTPGSTVLYR	3.7	-0.142	-0.9	0.37124	0.82	0.37124	3.12657	3.2545	3.34636	3.57213	3.28028	3.41366	3.27625	3.5137	3.72691	3.48269	3.77804	3.87333	3.80315	4.02501	3.47144	3.5484	3.92213	4.19106	3.8495	4.06709	4.11137	4.28704	3.70413	4.22437	3.18598	3.32224	4.14886	4.15988	3.47435	3.51777	4.00896	4.04347	3.62703	3.82049	3.44303	3.43811	3.82072	3.87266	3.50113	3.64772
CO3_HUMAN	KQELSEAEQATR	1.66	0.018	0.08	0.93309	0.01	0.93309	0.6013	0.8325	0.96482	1.05105	1.77477	1.64602	2.03705	2.12617	1.67755	1.2504	1.54966	2.04843	1.68048	1.89778	1.6266	1.37779	2.25536	2.46352	1.99303	2.21734	1.72622	2.0166	2.17352	2.43888	0.9785	1.13856	2.2255	2.37509	1.25222	1.16255	2.05864	2.26548	1.30459	1.51327	1.07593	1.38898	1.92613	1.42259	NA	1.08274
CO3_HUMAN	SSLSVPYVIVPLK	3.95	-0.236	-0.18	0.8559	0.03	0.8559	3.9064	3.99381	3.77387	-3.9189	4.10924	4.16964	3.93007	4.29275	4.07921	3.96026	4.44265	4.69289	4.35621	4.42104	4.06227	4.19592	4.52705	4.82353	4.32817	4.57622	4.84516	5.05786	4.3877	4.70041	4.10483	4.21603	4.66719	4.94339	4.2454	4.24442	4.63797	4.70582	4.23741	4.34314	4.19464	4.08572	-3.2298	4.44549	4.30134	4.29904
CO3_HUMAN	VSHSEDDCLAFK	3.16	-0.124	-0.55	0.58548	0.3	0.58548	2.01466	3.18099	3.14123	3.44194	2.81615	2.76492	2.99991	2.65274	2.96155	2.92957	3.12451	3.22045	3.02453	3.19302	2.89094	2.82976	3.67612	3.78038	3.47714	3.87356	3.54205	3.62954	3.2906	3.12608	2.51955	2.90066	3.52807	3.78943	3.17971	3.13742	3.15782	3.4795	3.07002	3.20358	2.94814	2.96878	3.28012	3.22287	2.8648	3.63415
CO3_HUMAN	IPIEDGSGEVVLSR	2.04	-0.088	-0.17	0.86576	0.03	0.86576	0.33875	2.41579	1.37332	1.69251	0.91862	2.55788	1.539	1.22517	2.23114	2.0938	2.78219	2.90009	2.30942	2.26769	1.71548	1.54042	3.16269	3.65887	1.40065	1.7512	2.77059	3.02353	0.69379	0.96614	1.10732	0.58017	2.94584	3.06608	2.22987	2.11948	3.00908	2.99459	2.27885	2.05274	2.23044	2.18477	2.54732	2.32869	-0.2079	2.71823
CO3_HUMAN	AAVYHHFISDGVR	3.39	-0.186	-1.05	0.3007	1.1	0.3007	2.92944	2.47732	3.15979	3.12631	3.07935	3.01723	3.55135	2.76683	3.17758	3.0987	3.64319	3.7832	3.5785	3.61296	3.24901	3.12387	3.64297	3.52939	3.71746	3.57759	4.04593	3.77081	3.56866	3.18481	3.22626	3.19412	3.76322	3.47044	3.4403	3.36757	3.71664	3.84625	3.21599	3.28068	3.59835	3.56174	3.35353	3.66932	3.24832	3.03674
CO3_HUMAN	GQGTLSVVTMYHAK	2.91	-0.175	-0.94	0.35292	0.88	0.35292	2.25616	2.32808	2.45757	3.04189	2.18107	2.30228	2.94362	2.99025	2.7868	2.52021	3.45683	3.29818	3.0694	3.04669	2.79377	2.62942	2.94624	2.97018	3.16039	3.24374	3.28769	3.33882	3.0775	3.37523	2.39642	2.45845	4.07949	4.0111	3.02304	2.94875	3.41433	3.40704	2.73275	2.73251	2.68661	2.20108	2.83873	2.70721	2.5907	2.60683
CO3_HUMAN	LVAYYTLIGASGQR	2.09	-0.217	-1.23	0.22607	1.51	0.22607	1.55179	1.53377	1.13941	1.13336	2.20702	2.12725	2.1275	2.05084	1.74859	1.53399	2.44436	2.23797	2.35605	2.06347	2.08317	1.85209	2.35521	2.47808	2.45592	2.10673	2.87521	2.87321	2.59131	2.664	1.98274	1.87179	2.56253	2.351	1.74503	1.58085	2.81492	2.66412	2.12978	1.95158	1.6967	1.65618	1.97128	2.03127	2.16559	1.75388
CO3_HUMAN	AAVYHHFISDGVRK	1.59	0.309	0.43	0.66611	0.19	0.66611	0.14098	2.41896	0.56521	2.16716	1.406	2.32966	2.47216	2.32519	2.6501	3.06593	0.95101	2.2839	1.11016	2.89546	2.07541	1.41114	1.11211	2.58158	-0.231895	1.23942	0.149395	0.987275	0.66401	1.53642	0.59299	2.01545	-0.80131	1.75372	0.92294	1.79016	1.1295	2.58227	0.87997	2.27677	1.90909	2.83023	2.96836	2.23922	0.53881	1.82353
CO3_HUMAN	FYHPEKEDGKLNK	-1.16	-0.029	-0.11	0.90931	0.01	0.90931	NA	NA	-1.6946	-1.43649	-1.6887	-2.27102	-0.4548	-0.606785	-1.57835	-1.76216	-1.00794	-0.62465	-1.28952	-1.00918	-1.47916	-1.37865	-0.79458	-1.07742	-0.766045	-0.91074	-0.786085	-0.573415	-0.59049	-0.36926	-2.01421	-2.1775	0.08708	0.123695	-1.49395	-1.57292	-0.61728	-0.650015	-1.69695	NA	-1.61664	-1.37816	NA	-1.163	-2.30376	NA
CO3_HUMAN	RIPIEDGSGEVVLSR	2.48	-0.194	-1.27	0.2124	1.6	0.2124	1.9865	2.08993	1.90792	1.9796	2.19215	2.28415	2.52986	2.6339	2.0618	1.97219	2.68918	2.75063	2.41877	2.59399	2.19895	2.20819	2.71812	2.86549	2.64013	2.92841	3.07193	3.15481	2.54048	2.91595	2.03707	2.20719	3.07283	2.86137	2.2062	2.11352	2.93328	3.0303	2.36454	2.34901	2.32097	2.33616	2.64794	2.70061	2.19587	2.47298
CO3_HUMAN	TVMVNIENPEGIPVK	2.79	-0.269	-1.84	0.07316	3.38	0.07316	2.15531	2.16625	2.79256	2.79938	1.90338	1.94772	2.46694	2.46747	2.64135	2.44845	3.05134	3.17142	2.81318	2.93968	2.57881	2.54543	2.77083	2.83187	3.19421	3.36555	3.36017	3.44527	2.89035	3.0334	2.27196	2.23414	3.4644	3.42218	2.77782	2.72817	2.94279	3.06114	2.82707	2.92767	2.69367	2.67537	3.03997	2.94732	2.79174	2.88817
CO3_HUMAN	AGDFLEANYMNLQR	2.91	-0.276	-1.52	0.13732	2.3	0.13732	2.18889	2.35939	2.59319	2.83078	2.39609	2.2499	2.42406	2.69847	2.80781	2.47697	3.00234	3.32603	3.11091	3.11932	2.71477	2.86112	2.86231	2.95177	3.05098	3.39567	3.36239	3.54664	3.02074	3.39217	2.51834	2.5792	3.4926	3.7759	2.9053	2.88863	3.43758	3.20283	2.90467	3.13376	2.82774	2.95054	2.4756	3.07618	2.64798	2.81121
CO3_HUMAN	VYAYYNLEESCTR	2.22	-0.081	-0.46	0.64749	0.21	0.64749	1.60823	1.75528	1.88257	1.77039	1.73743	1.83227	2.1664	2.18342	1.99728	1.98844	2.42976	2.55583	2.20583	2.49809	2.17398	2.01322	2.42576	2.65166	2.75892	2.89195	2.66414	2.87398	2.50596	2.99369	1.87155	2.01778	2.67012	2.66962	2.16893	1.93391	2.73509	2.70817	1.93738	2.13037	1.32631	1.45914	1.78944	1.88854	2.32229	2.48576
CO3_HUMAN	SYTVAIAGYALAQMGR	-1.11	-0.483	-0.88	0.38685	0.77	0.38685	NA	-2.21867	NA	NA	-1.22734	-1.49163	-0.25839	-2.37803	NA	-2.06429	-0.798	-1.27129	-1.08042	-1.32791	0.26682	-1.04204	-1.87723	-2.85295	-0.315315	-1.28707	0.394585	-0.824945	0.59881	-0.98762	-0.97404	-1.97457	-0.45129	-1.2673	-1.48831	-1.7861	-0.99977	-1.04832	-0.39649	-1.05422	NA	NA	-1.15342	NA	-0.67151	-1.3495
CO3_HUMAN	VFLDCCNYITELR	4.31	-0.258	-1.61	0.11435	2.6	0.11435	3.97079	3.89487	3.99257	4.18248	3.83791	3.76957	4.07166	4.33519	4.1696	4.07539	4.76136	4.90898	4.41712	4.49876	4.01001	4.19976	3.8736	4.00802	4.19616	4.34449	4.78095	4.9669	4.26948	4.47516	4.08249	4.16263	4.82818	5.12655	4.35652	4.39579	4.72699	4.89011	4.19409	4.31822	4.00113	4.21518	4.08162	4.4729	3.95229	4.38821
CO3_HUMAN	SGIPIVTSPYQIHFTK	4.28	-0.179	-1.18	0.24585	1.39	0.24585	3.99384	3.97357	3.85949	3.8607	3.87729	3.87528	4.12996	4.47319	4.06969	3.82551	4.63556	4.64119	4.47729	4.45925	3.90601	4.13162	4.16952	4.40797	4.43208	4.58831	4.82592	4.90451	4.28418	4.5786	3.96078	4.04536	4.72355	4.89834	4.18664	4.1695	4.77566	4.63195	4.13762	4.27541	4.25126	4.08142	4.12819	4.50518	4.02399	3.96972
CO3_HUMAN	DICEEQVNSLPGSITK	2.08	-0.226	-1.1	0.27813	1.21	0.27813	1.4308	1.76711	1.16662	1.46794	1.8076	2.11633	1.72481	1.96111	1.90025	1.73465	1.77314	1.89787	1.61872	1.88147	1.68921	1.75613	2.92005	3.28502	2.49742	2.8928	2.71647	2.99186	2.3149	2.70437	1.57788	1.86752	2.16847	2.49471	1.77721	1.92177	2.39348	2.58961	2.06449	2.33635	1.88095	2.04113	1.98249	2.04405	1.82309	2.12452
CO3_HUMAN	VELLHNPAFCSLATTK	2.82	-0.133	-0.79	0.43688	0.62	0.43688	2.17667	2.46905	2.5358	2.71349	2.35296	2.51155	2.55087	2.89397	2.80418	2.59986	3.01272	3.11697	2.89137	2.94236	2.53362	2.61902	2.91756	3.19367	2.88727	3.38525	3.31955	3.44826	2.65459	3.17088	2.24519	2.41691	3.18689	3.29651	2.72691	2.71987	3.01304	3.17347	2.68755	2.96304	2.83726	2.7334	2.90702	2.97835	2.49914	2.80003
CO3_HUMAN	SNLDEDIIAEENIVSR	3.4	-0.083	-0.46	0.64843	0.21	0.64843	3.10766	3.40866	2.52071	2.79207	3.5344	3.52033	3.23369	3.59424	3.00242	3.13706	3.50204	3.67287	3.36228	3.53739	3.16179	3.25741	3.72664	3.82603	3.45438	3.85309	3.9796	4.09504	3.49365	3.91183	3.15264	3.37902	3.42527	3.72229	3.20042	3.25033	3.30341	3.85629	3.32154	3.45836	3.03173	3.01253	3.22641	3.21134	3.18607	3.65638
CO3_HUMAN	KVFLDCCNYITELR	3.41	-0.262	-1.62	0.1118	2.64	0.1118	2.68671	2.76485	3.30783	3.44079	2.92569	2.71133	3.26134	3.63773	3.42221	3.14042	3.898	3.79689	3.51262	3.69236	3.15382	3.31798	3.06472	3.16183	3.31142	3.45272	3.79062	3.95442	3.47839	3.73368	2.86588	3.08659	4.19436	4.26143	3.50424	3.56494	3.93587	4.07322	3.23566	3.40403	3.4553	3.36513	3.45796	3.42891	3.03762	3.07377
CO3_HUMAN	VHQYFNVELIQPGAVK	4.41	-0.214	-1.37	0.17872	1.87	0.17872	3.754	3.74731	4.42036	4.64187	3.75434	3.63292	4.20201	4.4675	4.39742	4.12404	4.64911	4.66492	4.4057	4.42268	4.13789	4.23396	4.45454	4.31622	4.70763	4.88229	4.79997	4.83078	4.44549	4.73991	3.80951	3.80776	5.30593	5.18367	4.48389	4.40425	4.82416	4.73616	4.45136	4.55248	4.35006	4.2635	4.25777	4.49349	4.20763	4.35365
CO3_HUMAN	SEETKENEGFTVTAEGK	1.42	0.042	0.19	0.85189	0.04	0.85189	0.58007	1.20191	0.93234	0.91462	1.4095	1.4253	1.93006	2.04691	0.83746	0.84827	1.61177	1.77025	1.26873	1.7584	1.16227	1.0814	2.17907	2.28981	1.60562	1.94613	1.4965	1.66833	1.99957	2.09777	0.85814	1.059	2.50012	2.49811	0.92726	0.80704	1.71913	2.00895	0.76491	1.08482	0.835	0.94431	1.62997	1.04517	0.93517	1.08147
CO3_HUMAN	TELRPGETLNVNFLLR	3.73	-0.505	-1.57	0.12409	2.46	0.12409	3.25037	2.12029	3.93784	3.82775	3.02836	2.89194	3.50439	3.51863	3.83219	3.90437	4.71846	4.70726	4.24739	4.07826	3.57252	3.88744	1.90709	0.77599	4.01114	3.82044	4.30096	3.8779	3.68302	3.61602	3.29456	2.75917	4.91473	5.11937	4.2116	4.1343	4.42733	4.40805	4.20902	4.16312	4.1924	4.07481	4.12685	4.16491	2.9829	2.98495
CO3_HUMAN	EYVLPSFEVIVEPTEK	2.23	-0.293	-1.56	0.12704	2.42	0.12704	1.49726	1.54312	2.38334	2.363	1.34149	1.18364	1.86836	1.84806	2.20343	2.03975	2.66985	2.84162	2.54109	2.40103	2.22921	2.20852	1.74279	1.27556	2.69508	2.76583	2.55423	2.44844	2.31081	2.31239	1.42538	1.46826	2.99056	3.14073	2.24405	2.2028	2.69571	2.56211	2.65792	2.65528	1.98187	1.88128	2.41361	2.72523	2.21595	2.61063
CO3_HUMAN	LSINTHPSQKPLSITVR	3.65	-0.171	-1.01	0.31606	1.03	0.31606	3.29582	3.16858	2.8956	3.42495	3.21086	3.41068	3.87965	3.97899	3.47994	3.38284	3.86522	4.01643	3.59001	3.77787	3.37021	3.23882	3.6691	3.99756	3.67809	3.98305	4.06496	4.26797	3.71478	4.0224	3.25584	3.38117	4.36223	4.48276	3.53878	3.50257	4.07752	4.11325	3.49436	3.59417	3.61577	3.43174	3.64724	3.57916	3.19761	3.3845
CO3_HUMAN	SGQSEDRQPVPGQQMTLK	2.3	-0.082	-0.44	0.66483	0.19	0.66483	1.23373	1.58949	1.94517	2.35356	1.95578	2.00832	2.54544	2.27577	2.21723	2.12528	2.4629	2.56716	2.33344	2.50968	2.11945	1.93431	2.71931	2.79807	2.53371	2.90524	2.69414	2.75989	2.6229	2.12634	1.78018	1.99766	2.8107	3.18044	2.14181	2.23262	2.48146	2.8607	2.02347	2.25561	2.25237	2.2596	2.42244	2.27467	1.76062	1.84411
CO3_HUMAN	KVEGTAFVIFGIQDGEQR	-0.83	-0.186	-0.47	0.63911	0.22	0.63911	-0.67924	-1.15014	-2.0258	-3.14937	-0.6082	-0.92252	0.03874	-1.04425	-1.37564	-1.28798	-0.63503	-0.9904	-0.26363	-0.69154	-0.07624	-1.08095	-0.67266	-1.40447	0.259845	-0.65605	0.178815	-0.144145	0.27911	-0.5307	-1.03932	-1.43892	-0.41309	-1.07639	-1.14141	-1.57234	-0.29719	-0.493325	-0.10155	-0.684295	-1.77465	-2.09115	-0.273345	-1.30746	-0.06104	-0.704955
CO3_HUMAN	VRVELLHNPAFCSLATTK	2.53	-0.314	-1.87	0.06875	3.49	0.06875	1.85258	1.9027	2.24216	2.14544	2.06835	2.03003	2.38867	2.73175	2.3231	2.02448	2.81468	2.82843	2.54795	2.6023	2.05952	2.21269	2.46189	2.532	2.72591	3.01079	3.11123	3.21794	2.63649	2.99922	1.98294	1.98435	3.48218	3.34312	2.52573	2.48099	3.00601	2.97077	2.44044	2.57427	2.58272	2.42385	2.72227	2.72591	2.08686	2.47839
CO3_HUMAN	DAPDHQELNLDVSLQLPSR	0.85	-0.54	-0.97	0.33679	0.95	0.33679	NA	-0.57472	0.82043	-0.71285	NA	-1.14277	NA	0.581525	1.23682	1.06851	1.85244	0.8608	1.65786	1.25264	NA	0.37344	-1.46907	NA	2.46998	1.4546	0.703705	0.401125	2.23272	1.45879	NA	-0.65963	2.49679	1.03072	1.5567	0.08627	1.79768	1.5459	1.8188	0.661485	0.39581	0.25935	NA	-0.34552	2.15179	NA
CO3_HUMAN	ILLQGTPVAQMTEDAVDAER	5.16	-0.281	-1.49	0.14301	2.23	0.14301	4.27753	4.79443	4.94603	5.29366	4.63672	4.73048	4.85835	4.94874	4.89291	5.0121	5.66493	5.71468	5.29946	5.28477	4.8053	5.15844	4.89925	4.79991	5.03538	5.24303	5.77107	5.41866	5.32822	5.40644	5.00722	4.89848	5.66317	6.22375	5.36655	5.45448	5.20017	5.55858	5.22562	5.23388	5.22967	4.9782	4.96462	5.34124	4.62054	5.03066
CO3_HUMAN	QCQDLGAFTESMVVFGCPN	-1.13	-0.344	-0.59	0.56097	0.34	0.56097	-1.85465	-2.09252	-1.52093	-1.24669	-2.14515	-2.757	-0.0364	-1.7615	-1.45963	-1.38953	0.3134	-0.20003	-0.47413	-1.14846	-0.25737	-1.54509	-1.17647	NA	-2.62559	-1.57089	0.170045	-1.57127	0.43982	-2.09208	-1.80717	-2.32835	0.24558	-0.348365	-1.23243	-1.7089	-0.43986	-0.358395	0.48165	-0.604205	-1.1347	-2.26568	-0.468075	-2.0934	-1.00528	-1.15536
CO3_HUMAN	AYYENSPQQVFSTEFEVK	2.84	-0.212	-1.21	0.23207	1.47	0.23207	2.22021	2.31187	2.4318	2.49588	2.42074	2.37934	2.62211	2.95567	2.57434	2.5006	3.02965	3.19072	3.10763	3.09519	2.62215	2.88764	2.81436	2.46639	3.12479	3.38392	3.14751	3.42616	3.01637	3.00889	2.18136	2.37657	3.16748	3.69651	2.86177	2.91617	3.03883	3.25943	3.08046	3.21887	2.27137	2.38192	2.75101	2.84998	2.95122	3.27738
CO3_HUMAN	VPVAVQGEDTVQSLTQGDGVAK	4.86	-0.15	-0.97	0.33578	0.95	0.33578	4.24859	4.56376	4.58787	4.736	4.39557	4.60487	4.76041	5.00535	4.72	4.61209	5.2297	5.03753	4.88316	5.05893	4.43872	4.60592	4.96817	5.16446	4.88708	5.24253	5.19649	5.26347	4.79955	5.22948	4.42724	4.52423	5.4346	5.48942	4.8192	4.7685	5.2424	5.25692	4.63785	4.79105	4.85366	4.87763	4.8731	4.83072	4.59281	4.8338
CO3_HUMAN	EDIPPADLSDQVPDTESETR	4.62	0.257	1.36	0.18099	1.85	0.18099	4.59508	5.01079	4.1837	4.86847	4.83768	5.03406	4.74926	5.05656	4.81502	4.6116	4.3722	4.62475	4.5071	4.86658	4.61911	4.71956	4.81251	5.07852	4.60274	5.02731	4.51379	4.66355	4.64766	4.97756	4.46992	4.66781	4.10905	4.49984	4.44756	4.56159	4.1285	4.29312	4.29937	4.72368	4.23041	4.3064	4.48128	4.67194	4.34036	4.82468
CO3_HUMAN	VQLSNDFDEYIMAIEQTIK	3.84	-0.664	-1.32	0.19318	1.75	0.19318	3.01511	3.12233	4.71784	4.66043	2.49378	1.92207	3.88841	4.18797	4.01142	3.62197	4.90024	4.91885	4.26289	4.31737	4.09364	4.32518	1.18882	-1.69783	4.07629	4.05412	4.06362	3.89744	3.84365	4.1288	3.08025	2.80619	5.31763	5.69137	4.31273	4.50626	4.39315	4.65278	4.06965	3.95493	3.60732	3.60361	4.00859	4.5975	4.36022	4.45876
CO3_HUMAN	SLYVSATVILHSGSDMVQAER	-0.75	-0.349	-0.51	0.61226	0.26	0.61226	-0.47421	-1.21376	-1.02642	-1.93755	-0.5892	-1.099	0.26988	-2.01715	-1.18261	-1.49295	-0.25664	-0.76252	-0.08145	-1.06404	0.63312	-1.70925	-1.15714	-2.93936	0.548155	-0.92723	0.658925	-0.218525	0.96989	-1.06793	-0.68178	-1.57473	0.4524	-0.471985	-0.1056	-1.1633	0.57496	-0.490765	-0.16929	-1.63197	-1.7207	-1.95929	-1.23968	-1.43792	0.82866	-1.05225
CO3_HUMAN	SEFPESWLWNVEDLKEPPK	1.71	-0.547	-2.2	0.03364	4.83	0.03364	1.10669	1.11763	1.72614	1.70068	0.69373	0.4945	1.52474	1.54688	1.59314	1.40318	2.31582	2.4825	2.02808	1.88654	1.72748	1.69792	0.22673	-0.76871	2.09199	2.05518	2.39426	2.18641	1.80219	1.88299	1.22679	0.97858	2.66878	2.80699	1.85655	1.65492	2.59399	2.44029	2.01051	1.84986	1.84017	1.7138	1.929	2.28414	1.60747	1.8715
CO3_HUMAN	SSLSVPYVIVPLKTGLQEVEVK	-0.36	-0.267	-0.66	0.51308	0.44	0.51308	0.26209	0.30894	0.07635	0.26948	0.51435	0.75753	0.61805	0.792245	0.74291	0.5162	-0.85724	-0.8138	-1.11723	-1.1114	-1.53639	-1.61009	-2.59689	-2.6755	-1.64586	-1.35143	0.260435	0.661465	1.37785	1.55092	0.36038	0.39535	1.47452	1.71359	0.63204	0.74373	-0.22314	-0.331935	-1.27753	-1.32064	-1.859	-1.73224	NA	-2.00412	-2.17141	-1.65995
CO3_HUMAN	DYAGVFSDAGLTFTSSSGQQTAQR	-0.91	0.185	0.51	0.61362	0.26	0.61362	-0.46016	-1.0967	-2.83448	NA	-0.36446	-0.47096	-1.00275	-0.748805	-1.20144	-0.93113	-0.16124	-0.7254	-0.24269	-0.38019	-0.99839	-1.17444	0.35461	-1.0333	-0.518835	-0.61157	-1.0378	-0.214515	-0.73704	-0.75451	-2.07543	-1.6977	-0.08885	-1.2874	-1.14904	-1.25409	-0.00912	0.032755	-0.28899	-0.646875	-1.46616	-1.9953	-1.52479	-1.40172	-2.06817	-1.11939
CO3_HUMAN	QKPDGVFQEDAPVIHQEMIGGLR	2.72	-0.253	-1.53	0.13269	2.35	0.13269	2.20683	2.16724	2.67169	2.86075	2.04797	2.06275	2.49666	2.72248	2.51855	2.21243	2.91313	2.6504	2.64109	2.57126	2.52648	2.44365	2.76117	2.65001	3.24916	3.42021	3.31745	3.33433	2.87998	3.24088	2.25117	2.1778	3.24467	3.51293	2.77225	2.55449	3.07149	3.12339	2.73053	2.8121	2.82428	2.52732	2.497	2.76092	2.65921	2.563
CO3_HUMAN	TMQALPYSTVGNSNNYLHLSVLR	3.52	-0.302	-1.66	0.10376	2.77	0.10376	3.34027	2.96793	3.33495	3.73431	2.64971	2.69195	3.32736	3.57478	3.32518	3.22435	4.044	4.12745	3.80156	3.58931	3.41947	3.58778	2.73602	2.47325	3.57672	3.75474	4.08706	4.01002	3.55884	3.55362	3.16516	3.06675	4.18625	4.50669	3.70194	3.68025	3.89528	3.84342	3.54342	3.65937	3.43212	3.20864	3.39588	3.79907	3.61658	3.4161
CO3_HUMAN	DTWVEHWPEEDECQDEENQK	3	-0.127	-0.71	0.4793	0.51	0.4793	2.5011	2.44153	2.7435	2.95264	2.34477	2.18775	3.13564	3.35826	2.79098	2.61974	3.54685	3.7618	3.20551	3.24807	2.89258	3.02746	2.81584	2.72622	3.07588	3.42995	3.30889	3.33744	3.18969	3.40535	2.45574	2.34258	3.98469	4.05975	2.77593	2.86631	3.63897	3.66486	2.7045	2.83221	2.61479	2.70513	2.84299	3.0813	2.66958	2.87215
CO3_HUMAN	YYGGGYGSTQATFMVFQALAQYQK	1.36	-0.717	-2.07	0.04444	4.3	0.04444	0.16458	0.27109	1.85948	1.87832	0.01689	0.41081	0.5572	1.13244	1.09176	1.03116	2.23731	2.29618	1.90615	1.51161	1.17239	1.57069	-0.11194	-1.3238	0.846495	1.55193	1.91762	1.55137	1.75163	1.68483	0.68684	0.39499	2.87395	3.10812	1.81874	2.05714	2.3845	1.86919	1.56973	1.61546	1.49684	1.46999	1.31401	2.14108	0.90913	1.78646
CO3_HUMAN	YFKPGMPFDLMVFVTNPDGSPAYR	2.61	-1.212	-1.94	0.05956	3.76	0.05956	1.70927	1.10183	3.84375	3.70974	0.7965	-0.0119	1.81347	2.26933	2.89126	2.59943	3.92872	3.97435	3.44548	2.99433	2.84819	3.39224	-5.36015	NA	2.33325	2.52426	2.95433	2.63862	2.77963	2.87524	1.82396	1.40262	4.46392	4.88896	3.49722	3.42769	3.61658	3.50988	2.63866	2.67579	3.12282	2.81277	2.90543	3.79364	2.35685	2.75053
CO3_HUMAN	EGVQKEDIPPADLSDQVPDTESETR	-0.39	-0.216	-0.73	0.46802	0.54	0.46802	-1.61357	-1.25768	-1.59358	-1.17202	-0.84789	-0.70395	0.22393	0.557715	-1.07305	-1.09241	0.13363	0.45866	-0.17871	0.18136	-0.93537	-0.83538	0.34677	0.63633	-0.934085	-0.1866	-0.198095	0.135335	0.08503	0.62395	-0.82966	-0.53821	0.87902	1.01499	-0.83441	-0.82763	0.47062	0.608645	-0.89756	-0.478915	-0.34626	-0.1442	-0.791515	-0.65426	-1.8011	-1.04253
CO3_HUMAN	QVREPGQDLVVLPLSITTDFIPSFR	1.35	-0.303	-0.87	0.39135	0.75	0.39135	0.01133	-0.12587	2.30634	1.97641	-0.38347	-0.74107	0.66933	1.12146	1.65732	1.31215	2.43122	2.38504	2.23743	1.85709	1.25877	1.54444	NA	NA	0.567745	1.30212	1.31869	0.987655	1.09103	1.60876	0.16513	-0.00246	3.12726	3.57179	2.16448	2.07701	2.25712	2.16378	0.96397	0.933175	1.13645	0.89009	1.26513	1.76759	0.98919	1.35198
CO3_HUMAN	HYLMWGLSSDFWGEKPNLSYIIGK	-0.97	0.15	0.19	0.84788	0.04	0.84788	NA	NA	1.39324	0.69042	NA	NA	-2.09274	-3.35702	-0.85073	-1.86448	0.68623	0.41385	-0.4291	-1.7647	-0.00621	0.19056	NA	NA	-2.9412	-3.46065	-1.01069	-3.35298	-0.79489	-1.46415	-3.87974	NA	2.06587	2.3781	0.13583	-0.3894	0.28802	-0.056315	-2.70902	-3.06123	-0.63378	-2.00283	-0.292105	0.6882	-2.03136	-2.60353
CO3_HUMAN	KHYLMWGLSSDFWGEKPNLSYIIGK	0.31	-0.497	-0.9	0.37592	0.81	0.37592	NA	NA	1.15577	0.3339	NA	NA	-1.24191	-1.65457	NA	NA	1.28492	0.96209	0.52617	NA	0.14804	0.39997	NA	NA	NA	-1.84052	NA	NA	0.20158	-0.38738	NA	NA	2.01579	2.09862	0.50682	0.22844	1.37529	0.784115	NA	NA	0.63885	-0.11385	0.254225	0.98566	-1.5986	NA
CO3_HUMAN	YRGDQDATMSILDISMMTGFAPDTDDLK	-1.5	-0.756	-1.06	0.29578	1.12	0.29578	-1.92212	-2.96814	0.15649	-0.79802	-3.91354	-4.36097	-0.99279	-3.16107	-1.94441	-2.61306	-0.59292	-1.7198	-1.19019	-1.9895	-0.61812	-2.34223	-3.75935	NA	0.582475	-0.8624	-0.460595	-1.76192	0.21708	-1.8967	-2.37083	-3.56725	0.75671	-0.127215	-1.13145	-1.61825	-0.72551	-1.6093	0.09767	-1.44901	-1.93032	-2.57976	-0.414725	-1.9996	0.09174	-0.849545
CO3_HUMAN	LESEETMVLEAHDAQGDVPVTVTVHDFPGK	2.46	-0.293	-1.06	0.29497	1.13	0.29497	1.92075	2.00771	2.01541	1.45873	2.21419	1.86976	2.66942	2.13169	2.2841	1.83135	2.8483	2.57206	2.82353	2.39156	2.73165	2.01041	2.5292	1.86818	3.28884	2.79908	3.30307	3.1006	3.26937	2.69763	2.41776	2.17113	3.17689	2.72675	2.2811	2.11911	3.18967	2.68797	2.67653	2.22729	2.16056	1.98484	2.78708	2.10493	2.87095	2.17778
CO3_HUMAN	QDSLSSQNQLGVLPLSWDIPELVNMGQWK	-2.8	-1.417	-1.56	0.17544	2.43	0.17544	NA	NA	NA	NA	NA	NA	NA	NA	NA	NA	NA	NA	-4.69802	NA	NA	NA	NA	NA	NA	-2.319	NA	NA	NA	NA	NA	NA	NA	-1.84032	NA	NA	NA	NA	NA	NA	NA	NA	NA	NA	NA	-2.34296
CO3_HUMAN	HLIVTPSGCGEQNMIGMTPTVIAVHYLDETEQWEK	2.05	-0.59	-1.31	0.19658	1.72	0.19658	2.18054	1.38592	3.59102	3.56977	-0.40303	-1.066	2.23185	2.37317	1.4359	1.05905	3.28182	3.44486	2.90499	2.48573	2.74218	2.61265	-1.88717	NA	1.38596	1.29192	2.45671	2.00408	2.17894	2.20503	1.6259	1.26031	3.81424	3.92252	3.08031	2.91049	2.75328	2.66165	0.8633	0.679765	1.82455	1.48871	1.7049	2.01	2.86772	2.83358
CO3_HUMAN	NNNEKDMALTAFVLISLQEAKDICEEQVNSLPGSITK	-1.67	-0.448	-1.19	0.24234	1.43	0.24234	NA	NA	-1.35898	-1.35175	NA	NA	NA	NA	-3.37465	-3.33152	-1.63712	-0.94419	-2.39548	-2.00548	-1.5339	-1.90432	NA	NA	NA	NA	-0.766075	-1.08631	-1.42904	-0.90877	NA	NA	-1.64559	-1.52717	-1.41123	-1.18048	-0.56702	-0.629875	-2.84399	NA	-1.59802	-1.97851	NA	-1.28125	-2.20105	-2.65523
CO3A1_HUMAN	INTDEIMTSLK	-1.51	0.575	1.2	0.26762	1.44	0.26762	NA	NA	NA	NA	NA	NA	NA	NA	NA	NA	-1.61405	NA	NA	NA	NA	NA	-0.6337	NA	NA	NA	-1.92298	NA	NA	-1.44417	NA	NA	NA	NA	NA	NA	NA	-1.42087	NA	NA	NA	NA	-2.00608	NA	NA	NA
CO3A1_HUMAN	FTYTVLEDGCTK	-2.4	0.293	0.5	0.62954	0.25	0.62954	-3.06273	NA	NA	NA	NA	NA	NA	NA	NA	NA	-2.6398	NA	NA	NA	NA	NA	NA	-1.33826	-2.16663	NA	NA	NA	NA	-2.91249	NA	NA	NA	NA	NA	NA	NA	-2.27687	NA	NA	NA	NA	NA	NA	NA	NA
CO4A_HUMAN	NNVPCSPK	-2.77	-0.242	-0.55	0.58812	0.3	0.58812	-4.66542	-5.25745	-2.19457	-2.72161	-1.97558	-2.56735	-3.22247	-3.89016	-3.13153	-3.48858	-2.46584	-1.60091	-3.98857	-3.89316	-1.2742	-1.83177	-2.23073	-1.50517	-2.68267	-3.19562	-3.55697	-2.52476	-1.56838	-1.72502	NA	NA	-1.24842	-1.87366	-2.80478	-2.64122	-1.76823	-1.9144	-3.08478	-3.38964	-3.11739	-3.18681	-1.96398	-3.32314	-3.58619	-4.37685
CO4A_HUMAN	LELSVDGAK	3.04	-0.096	-0.46	0.65083	0.21	0.65083	2.72263	3.15366	2.6137	2.65291	3.11405	3.19227	NA	2.26281	NA	2.56087	2.78443	3.00266	2.07727	2.42577	3.77728	3.55794	3.4258	3.75054	3.24909	3.57539	3.33401	3.39949	3.59924	3.61474	NA	2.24323	2.52042	2.92969	2.84747	2.99046	2.95355	3.46121	2.90814	3.16032	2.63057	2.76032	3.02847	2.85589	3.55149	3.66282
CO4A_HUMAN	GQIVFMNR	2.35	-0.081	-0.44	0.6596	0.2	0.6596	2.17027	2.21359	2.61219	2.64038	2.05835	2.10694	1.7628	1.67745	2.23024	1.97028	2.3982	2.53351	1.77372	1.78805	3.01714	3.02453	2.55535	2.7256	2.36143	2.56436	2.70998	2.87516	2.83456	3.11009	1.25354	1.28614	2.87071	2.80972	2.51105	2.23784	2.76233	2.79363	2.20198	2.16662	1.93585	1.56107	2.12779	2.2497	2.72702	2.78517
CO4A_HUMAN	VEYGFQVK	3.29	-0.069	-0.42	0.67393	0.18	0.67393	3.30607	3.1318	3.11248	3.33585	3.39913	3.34797	2.74572	2.89457	3.08441	2.90858	3.33979	3.52078	2.84452	2.74624	3.82167	3.79919	3.5211	3.74211	3.12689	3.37418	3.61646	3.69679	3.77367	4.00097	2.34086	2.36231	3.43435	3.52373	3.43689	3.42214	3.75611	3.69008	3.07721	3.08501	2.72272	2.86076	3.08137	3.18976	3.61358	3.80579
CO4A_HUMAN	FACYYPR	2.4	-0.103	-0.67	0.50654	0.45	0.50654	2.10415	2.0567	2.59144	2.47986	2.48818	2.35718	1.90353	1.74047	2.11752	2.03964	2.58549	2.75271	2.07568	1.98694	3.10972	3.17148	2.46161	2.35383	2.30929	2.35329	2.83384	2.62539	2.87611	2.66274	1.52876	1.47723	2.68357	2.6859	2.69935	2.64767	2.742	2.8464	2.1677	2.24411	2.14381	2.11694	2.26266	2.45015	2.72775	2.67842
CO4A_HUMAN	QGSFQGGFR	1.19	-0.073	-0.27	0.79175	0.07	0.79175	0.89216	0.77397	-0.12167	-0.94469	1.90448	1.96851	0.94125	0.915695	0.61616	0.51102	1.1544	1.34245	0.77856	0.87656	1.7383	2.09847	2.13538	2.24688	1.4528	1.77164	1.75246	1.84987	2.07872	2.08161	0.89332	0.26121	0.95848	1.45705	1.05462	0.69485	1.74276	2.12812	0.85273	0.741415	0.42405	0.44794	0.832345	0.88987	1.63614	1.7389
CO4A_HUMAN	TYNVLDMK	2.7	-0.015	-0.08	0.93303	0.01	0.93303	2.67337	2.83298	2.79383	2.96902	2.55173	2.56211	2.20637	2.3664	2.50858	2.34286	2.86004	3.07687	2.01082	2.25881	3.22701	3.19317	2.80516	3.04661	2.6426	2.99972	3.03582	3.17959	3.00998	3.31594	1.75846	1.90826	3.43209	3.29899	2.62466	2.55743	3.05128	3.11563	2.28139	2.38525	1.99187	2.0676	2.31872	2.39097	3.12642	3.38533
CO4A_HUMAN	FGLLDEDGK	1.06	-0.166	-0.63	0.53272	0.4	0.53272	1.12664	1.433	-0.10271	0.20666	1.48456	1.57381	0.09529	0.398675	0.66107	0.33734	0.67217	0.99164	-0.12339	0.31444	1.72271	1.72802	1.71924	2.26616	1.22042	1.73318	1.71293	1.96737	1.5703	1.99176	0.05438	0.37485	0.74277	0.611115	0.60767	0.70377	1.29564	1.48941	0.79682	1.17108	0.86628	0.85543	1.1484	0.88232	1.77978	2.14936
CO4A_HUMAN	SHKPLNMGK	-2.21	-0.292	-0.98	0.33441	0.96	0.33441	-2.9324	-2.65562	-1.8626	NA	-2.84047	-3.46268	-2.07667	-2.27421	-3.16075	NA	-2.15524	-1.42476	-3.73321	NA	-1.60447	-1.66194	-2.06631	-2.17571	-1.70583	-1.84691	-2.01261	-1.63375	-1.53489	-1.66322	-4.05662	-4.34479	-0.73677	-1.08123	-2.29261	-2.24246	-1.75704	-1.47914	-2.65908	-2.33624	-2.16059	-2.09983	-2.23313	-2.21166	-1.88689	-1.87206
CO4A_HUMAN	LGQYASPTAK	1.79	0.084	0.39	0.69885	0.15	0.69885	1.4962	1.57581	1.61306	1.81802	2.17203	2.21269	1.47342	1.46053	1.71007	1.3382	1.61216	2.07284	1.19889	1.51985	2.6192	2.42145	2.19404	2.58263	1.61694	1.99013	1.71657	2.06446	2.43785	2.75166	0.56812	0.76429	1.98595	2.23475	1.71385	1.81698	1.86985	2.23435	1.43909	1.57692	1.25194	1.40774	1.84842	1.39622	1.77969	2.15488
CO4A_HUMAN	DHAVDLIQK	2.26	-0.043	-0.22	0.82315	0.05	0.82315	1.83551	2.18008	1.83102	2.03573	2.64585	2.68547	1.94588	1.85157	1.61203	1.71259	2.107	2.2707	1.46643	1.84819	3.00655	2.78119	2.94785	2.87361	2.4293	2.70716	2.60927	2.6734	2.81659	2.84698	1.35885	1.59361	2.08877	2.4796	2.09943	2.15028	2.35163	2.72023	2.03288	2.15096	1.98121	2.0539	2.22905	1.95405	2.77297	2.66369
CO4A_HUMAN	AEFQDALEK	2.9	-0.088	-0.41	0.6861	0.17	0.6861	2.33165	2.87405	1.93589	2.25923	3.12399	3.25099	2.33352	2.19938	2.4175	2.47078	2.77687	3.05428	2.27041	2.39726	3.51508	3.46064	3.62528	3.8362	3.24592	3.7065	3.4356	3.31942	3.30928	3.2196	2.15887	2.24869	2.77219	2.33446	2.53443	2.71335	3.04366	3.4983	2.9652	3.19143	2.65609	2.73048	2.94459	2.76142	3.47879	3.5197
CO4A_HUMAN	GLQDEDGYR	1.88	0.046	0.19	0.84637	0.04	0.84637	1.37381	1.55186	1.65114	1.95182	2.19206	2.16813	1.47754	1.55259	1.80849	1.56663	1.80737	2.36298	1.14736	1.4976	2.70678	2.47032	2.18211	2.53509	1.73094	2.23331	1.81295	2.23034	2.6148	2.93213	0.60393	0.81298	1.99783	2.52054	1.53935	1.76661	2.20779	2.45953	1.4331	1.76059	1.28762	1.43217	1.98307	1.60157	1.81633	2.23028
CO4A_HUMAN	SHALQLNNR	1.05	0.018	0.08	0.93558	0.01	0.93558	0.55883	0.8633	1.02499	1.22535	1.11259	1.15467	1.04967	0.976915	0.94105	0.62079	1.05471	1.6137	0.37468	0.67261	1.60291	1.66386	1.20517	1.24266	0.894215	1.26207	1.00598	1.35042	1.51222	1.852	-0.31448	0.20134	1.66876	1.87929	0.95685	1.06443	1.44426	1.70501	0.55353	0.752915	0.49649	0.7941	NA	0.79666	0.87729	1.32237
CO4A_HUMAN	VDFTLSSER	2.88	-0.087	-0.46	0.6502	0.21	0.6502	2.76963	2.93437	2.51711	2.88283	2.86701	3.00848	2.37339	2.38865	2.75674	2.4869	2.88171	3.18649	2.25108	2.53619	3.42235	3.39013	2.94846	3.27102	2.75568	3.0241	3.21635	3.49066	3.19422	3.63578	1.92112	2.21268	3.02242	3.3055	2.98543	2.81905	3.31704	3.4017	2.61477	2.73339	2.42872	2.14748	2.63199	2.69923	3.24976	3.36179
CO4A_HUMAN	SCGLHQLLR	2.37	-0.133	-0.72	0.47695	0.52	0.47695	2.00915	2.1138	2.60746	2.74781	2.24599	2.2393	1.91706	1.38149	2.07215	2.20117	2.4963	2.64398	1.95012	1.99272	2.88195	3.0311	2.42389	2.24723	2.34384	2.5043	2.93695	2.63072	2.68734	1.97907	1.64914	1.79773	2.4282	2.44877	2.65101	2.6777	2.55375	2.89574	2.0896	2.37843	2.37616	2.45072	2.27555	2.30312	2.87659	2.61685
CO4A_HUMAN	ITQVLHFTK	2.13	-0.095	-0.39	0.69778	0.15	0.69778	2.17851	2.27218	2.32933	NA	1.90239	1.75509	NA	1.67742	NA	NA	NA	NA	NA	NA	NA	2.54461	1.9612	2.03975	1.80594	1.8595	NA	2.53204	2.23271	2.47379	NA	1.18002	2.41264	2.66246	NA	NA	NA	NA	NA	NA	NA	NA	1.71391	NA	2.49474	2.52183
CO4A_HUMAN	YVLPNFEVK	2.66	-0.117	-0.62	0.53821	0.39	0.53821	2.69745	2.93605	1.9464	2.17536	2.95743	2.83844	1.97494	2.29985	2.26234	1.94174	2.49537	2.37671	1.9034	2.14516	3.26427	3.29952	3.16103	3.42447	2.9642	2.97558	3.08771	3.29618	3.00663	3.29312	1.82554	1.99579	2.50481	2.50341	2.43091	2.38011	2.97553	3.02226	2.6764	2.798	2.53115	2.45909	2.37129	2.45611	3.35074	3.40645
CO4A_HUMAN	VGDTLNLNLR	3.08	-0.119	-0.7	0.48584	0.49	0.48584	2.89134	3.00281	3.07102	3.20713	2.89046	3.01733	2.41744	2.61334	2.87454	2.74252	3.10542	3.31629	2.49056	2.66791	3.56112	3.55075	3.14705	3.51905	3.01242	3.26543	3.4023	3.54859	3.28124	3.55929	2.04509	2.3081	3.54478	3.68544	3.1039	3.19593	3.37859	3.52286	2.75694	2.98258	2.7532	2.70907	2.95069	2.95496	3.45057	3.61923
CO4A_HUMAN	CSVFYGAPSK	0.56	0.055	0.3	0.76192	0.09	0.76192	0.08104	0.40632	0.59642	0.71164	0.80404	0.90386	0.09386	0.025705	0.29156	0.39365	0.45785	0.64725	-0.11032	0.03081	1.14941	1.24264	0.93671	1.23809	0.996955	0.87524	0.792665	0.744045	1.20333	0.85517	-0.34821	0.15109	0.6553	0.777075	0.53471	0.59798	0.81239	1.00348	0.15252	0.322235	-0.01564	0.14264	0.414505	0.16454	0.81668	0.902585
CO4A_HUMAN	FGLLDEDGKK	1.9	-0.216	-0.88	0.38612	0.78	0.38612	1.9302	2.1076	NA	NA	1.73546	1.74771	NA	0.923345	1.15496	NA	NA	NA	NA	1.08409	2.08194	2.15599	2.1512	2.42453	1.94512	2.05065	2.2189	2.35736	1.84335	2.10147	NA	0.85644	NA	NA	NA	NA	2.30988	2.1428	1.67405	1.84153	NA	NA	NA	1.62697	2.36706	2.57757
CO4A_HUMAN	VDVQAGACEGK	0.13	0.119	0.4	0.6881	0.16	0.6881	-0.81102	-0.39417	NA	0.05216	0.48235	0.56374	-0.46898	-0.245285	0.16735	-0.3747	-0.4026	0.20712	-0.99169	-0.59879	1.18655	0.98998	1.01217	1.55283	0.704505	0.94538	-0.078685	0.416125	0.93258	1.21486	-1.90533	-1.44619	0.4132	0.498025	-0.21262	-0.08466	0.39194	0.530775	NA	0.379515	-0.2959	-0.26837	NA	-0.14621	0.18458	0.538065
CO4A_HUMAN	YRVFALDQK	-2.49	-0.457	-0.67	0.51794	0.44	0.51794	NA	-2.70873	-2.47039	-3.55136	-2.41963	-2.63209	NA	NA	NA	NA	NA	NA	NA	NA	NA	NA	NA	NA	NA	NA	-3.17271	NA	NA	-1.58976	NA	NA	-1.40642	-2.20039	-2.19822	-3.04024	NA	NA	NA	NA	NA	NA	NA	NA	NA	NA
CO4A_HUMAN	ADGSYAAWLSR	1.46	-0.141	-0.67	0.5087	0.44	0.5087	1.47987	1.65689	1.1628	1.21714	1.51753	1.26497	0.76052	1.15133	0.87863	0.57369	1.41703	1.84627	0.85861	0.90815	1.91973	2.12983	1.56514	1.69885	1.50124	1.90304	1.78459	1.9509	1.68006	2.27982	0.31521	NA	1.67771	1.68192	1.15885	1.24484	1.96025	2.02781	1.3439	1.37298	1.10314	0.96042	1.38159	1.28474	2.16464	2.3264
CO4A_HUMAN	GLCVATPVQLR	3.49	-0.194	-0.91	0.36749	0.84	0.36749	NA	3.4887	3.36721	3.44407	3.22024	3.50909	NA	NA	3.0557	2.833	3.20343	3.21249	NA	NA	3.74804	3.99406	3.37387	NA	3.21545	3.77713	NA	3.8453	3.66283	4.25374	NA	NA	3.46278	3.45425	3.39271	3.4249	3.62356	3.60206	3.35217	3.42407	3.40858	3.35322	3.36566	NA	3.52266	4.22311
CO4A_HUMAN	KYVLPNFEVK	1.49	-0.27	-1.23	0.22549	1.52	0.22549	1.78182	NA	1.41125	1.17902	1.33332	1.3032	0.64893	0.613565	1.00101	0.95947	1.60998	NA	1.09259	0.61471	1.85526	1.78432	1.88162	NA	1.67711	1.58122	1.80124	1.63772	1.47135	2.03992	0.23184	NA	1.8204	1.55275	1.48828	1.60628	2.30969	1.84923	1.82362	1.51774	1.60581	1.58194	1.50659	1.59609	2.52112	NA
CO4A_HUMAN	EMSGSPASGIPVK	3.66	-0.046	-0.23	0.82061	0.05	0.82061	3.26119	3.68036	3.75527	3.97964	3.61887	3.6799	3.21744	2.52712	3.37351	3.33877	3.60158	3.85461	3.14019	3.27708	4.25537	4.17659	4.04427	4.16631	3.74987	4.0762	4.07454	3.85086	4.11188	3.85651	2.6995	2.91917	3.84259	3.83121	3.8309	3.86959	3.73144	4.2766	3.32598	3.5959	3.27851	3.35687	3.47035	3.45999	4.04871	4.26354
CO4A_HUMAN	RCSVFYGAPSK	-1.42	-0.034	-0.13	0.89567	0.02	0.89567	NA	NA	-1.28006	-1.55338	-1.60618	NA	-1.60217	NA	-2.52715	NA	NA	-1.34393	NA	-2.12659	-0.77741	-0.51302	-1.15449	-1.62412	-1.42362	-1.32323	-0.987255	-1.04649	-1.12868	-1.19607	NA	-3.19612	-0.8765	-0.787635	-1.53551	-1.53599	-0.77487	-1.07771	NA	-1.85886	NA	-2.03857	NA	-1.43787	NA	-1.29696
CO4A_HUMAN	LVNGQSHISLSK	1.45	-0.193	-0.97	0.33922	0.93	0.33922	1.38424	1.80349	0.68179	0.75132	1.71942	1.6165	0.97683	0.682855	0.56471	0.67111	1.26258	1.34317	0.62707	0.83211	1.90036	2.04866	2.15784	2.04513	2.05712	1.90736	2.10478	1.96033	1.82956	1.64861	0.68648	0.77213	1.19742	1.20947	1.1959	1.26669	1.79998	1.83312	1.37599	1.57557	1.56353	1.429	1.13186	1.50867	2.36341	2.44179
CO4A_HUMAN	KADGSYAAWLSR	1.65	-0.3	-1.53	0.13376	2.34	0.13376	1.64453	1.39828	1.83481	1.8179	1.21277	0.56668	1.27556	1.09855	1.02878	0.94144	1.7547	2.05964	1.22741	1.22228	2.10376	2.23847	1.85039	1.29179	1.69993	1.71657	NA	2.01724	1.67026	1.95833	1.05902	NA	2.10346	1.99564	1.80694	1.56397	2.19901	1.86953	1.58773	1.62948	1.7889	1.68455	1.48155	1.86495	2.32755	2.21258
CO4A_HUMAN	LNMGITDLQGLR	2.83	-0.242	-1.31	0.19668	1.72	0.19668	2.69448	2.83133	2.14686	2.2667	2.65097	2.62638	1.92707	2.30733	2.39727	2.148	2.78064	2.83065	2.21258	2.33018	3.30032	3.38312	3.26518	3.4413	3.13797	3.40735	3.27779	3.43209	3.0031	3.33412	2.03863	2.14529	2.78476	2.99715	2.58972	2.6306	3.22919	3.14061	2.93797	3.21747	2.95963	2.78859	2.52536	2.74737	3.61102	3.53621
CO4A_HUMAN	GSFEFPVGDAVSK	3.09	-0.112	-0.56	0.57843	0.31	0.57843	2.54395	3.29553	2.8665	3.01673	3.12328	3.23736	2.46123	2.69663	2.98504	2.6676	2.85266	3.09988	2.30629	2.52364	3.66952	3.69339	3.38589	3.65436	3.15882	3.52855	3.53208	3.68708	3.53123	3.83526	2.31577	2.38937	3.12427	3.10238	2.92001	2.88485	3.2641	3.47316	2.84011	3.10518	2.85958	2.85302	2.98862	2.96734	3.4739	3.86062
CO4A_HUMAN	DFALLSLQVPLK	2.14	-0.305	-1.47	0.1486	2.17	0.1486	2.02085	2.10828	2.56288	2.56992	1.68648	1.7606	1.4225	1.45517	2.04813	1.83651	2.56005	2.69114	1.82051	1.71844	2.91103	2.7196	0.77358	0.8062	2.08812	2.2305	2.67633	2.40087	2.3143	2.50848	1.07263	1.19271	3.00947	3.15349	2.50252	2.30098	2.60307	2.62159	2.19256	2.14784	1.7399	1.62611	1.94291	2.11069	2.73612	3.02814
CO4A_HUMAN	DSSTWLTAFVLK	1.81	-0.616	-2.23	0.03087	5	0.03087	1.51895	1.51949	1.32301	1.57172	0.98409	1.02129	0.91186	0.976145	1.48065	1.21928	2.21603	2.393	0.37052	0.14105	2.82223	2.84774	1.52638	1.29097	1.78489	2.02646	1.73683	1.5657	2.71353	2.94726	-0.29212	0.08535	2.53129	2.56788	1.58391	1.56276	2.55469	2.50113	2.87667	2.79143	2.32729	2.19301	2.12757	2.33824	2.52405	3.03043
[truncated: 1,882 more rows]
