# Supplementary material for: Analysis of the Cerebrospinal Fluid Proteome in Alzheimer's Disease
Source: PLoS One. 2016 Mar 7;11(3):e0150672. doi: 10.1371/journal.pone.0150672 (PMC4780771; doi:10.1371/journal.pone.0150672)
Supplement: S2 Table — (XLSX) [file pone.0150672.s033.xlsx]

## Sheet: Sheet1
S2 Table. LC-MS/MS run order CSF samples
Run order	Sample
1	Control9_1
2	AD8_1
3	AD4_1
4	Control2_1
5	Control10_1
6	AD10_1
7	Control4_1
8	AD2_1
9	Control7_1
10	AD6_1
11	AD1_1
12	Control6_1
13	Control3_1
14	AD7_1
15	AD9_1
16	Control1_1
17	AD3_1
18	Control5_1
19	Control8_1
20	AD5_1
21	AD5_2
22	Control8_2
23	Control5_2
24	AD3_2
25	Control1_2
26	AD9_2
27	AD7_2
28	Control3_2
29	Control6_2
30	AD1_2
31	AD6_2
32	Control7_2
33	AD2_2
34	Control4_2
35	AD10_2
36	Control10_2
37	Control2_2
38	AD4_2
39	AD8_2
40	Control9_2
