# Supplementary material for: Analysis of the Cerebrospinal Fluid Proteome in Alzheimer's Disease
Source: PLoS One. 2016 Mar 7;11(3):e0150672. doi: 10.1371/journal.pone.0150672 (PMC4780771; doi:10.1371/journal.pone.0150672)
Supplement: S4 DataFile — (XLSX) [file pone.0150672.s004.xlsx]

## Sheet: DecyderMS_reference_normalized_
S4 DataFile. DecyderMS reference normalized data quantification data.
Protein (Uniprot ID)	Peptide	A	Coef	t	p.value	F	F.p.value	AD1_1	AD1_2	AD2_1	AD2_2	AD3_1	AD3_2	AD4_1	AD4_2	AD5_1	AD5_2	AD6_1	AD6_2	AD7_1	AD7_2	AD8_1	AD8_2	AD9_1	AD9_2	AD10_1	AD10_2	C1_1	C1_2	C2_1	C2_2	C3_1	C3_2	C4_1	C4_2	C5_1	C5_2	C6_1	C6_2	C7_1	C7_2	C8_1	C8_2	C9_1	C9_2	C10_1	C10_2
1433B_HUMAN	NLLSVAYK	17.85	0.095	0.35	0.7328	0.12	0.7328	NA	NA	NA	NA	NA	17.7651	NA	NA	NA	NA	NA	NA	NA	NA	17.8749	17.8769	17.9751	18.1054	NA	17.7605	17.5842	NA	17.8693	17.9096	17.824	NA	NA	NA	NA	NA	NA	NA	NA	NA	NA	NA	NA	NA	NA	NA
1433B_HUMAN	DSTLIMQLLR	17.19	0.3	1.15	0.2587	1.31	0.2587	16.9254	16.7702	17.913	18.1069	17.1476	16.9986	16.8975	16.8664	17.7332	17.6868	17.925	17.8987	17.0949	16.7405	17.7399	17.7686	17.1623	16.2329	17.667	17.4269	17.5839	17.0591	17.4893	17.4271	17.5043	17.4388	15.61	15.5171	17.6149	17.4163	16.557	16.7448	17.4515	17.1106	17.2089	16.521	16.3799	16.7461	17.6724	17.6471
1433E_HUMAN	LICCDILDVLDK	16.02	0.617	1.64	0.12337	2.69	0.12337	NA	NA	16.9746	17.1287	NA	NA	NA	NA	NA	NA	16.0035	16.4069	NA	NA	16.0688	15.6428	16.0106	15.9532	NA	15.8248	NA	NA	NA	NA	15.6496	NA	NA	NA	15.5814	15.3288	NA	NA	NA	NA	NA	15.622	NA	NA	NA	NA
1433Z_HUMAN	DICNDVLSLLEK	16.06	-0.275	-0.53	0.60742	0.28	0.60742	15.2607	15.369	NA	NA	NA	NA	NA	15.6689	NA	NA	NA	NA	NA	NA	16.8417	NA	NA	NA	16.1216	15.8232	NA	15.9437	16.5313	15.9308	15.6319	16.6656	NA	NA	NA	NA	NA	NA	NA	NA	NA	NA	NA	NA	16.408	16.6081
4F2_HUMAN	GQSEDPGSLLSLFR	15.8	-0.115	-0.43	0.67063	0.19	0.67063	NA	16.0938	NA	15.2556	15.4764	NA	15.1853	15.6755	NA	NA	15.7276	15.9946	NA	NA	NA	15.7832	NA	NA	NA	15.8626	NA	15.7806	15.2035	NA	NA	NA	NA	NA	16.5667	16.325	15.0374	NA	16.3694	16.368	15.7471	NA	NA	15.8802	NA	NA
7B2_HUMAN	VSEADIQR	17.06	NA	NA	NA	NA	NA	NA	NA	NA	NA	NA	NA	NA	NA	NA	NA	NA	NA	NA	NA	NA	NA	16.8321	17.2971	NA	NA	NA	NA	NA	NA	NA	NA	NA	NA	NA	NA	NA	NA	NA	NA	NA	NA	NA	NA	NA	NA
7B2_HUMAN	SVNPYLQGQR	21.47	0.413	2.41	0.02072	5.79	0.02072	21.2049	21.5191	21.3558	21.5114	21.9736	21.948	21.7987	21.7455	21.7593	21.8419	21.1109	21.1899	21.5967	21.8466	21.7946	21.7489	22.0919	22.1196	21.668	21.76	21.5087	21.5405	21.5034	21.4016	21.6749	21.7985	19.8057	20.3202	21.4384	21.475	20.7887	21.0226	21.4964	21.6251	21.3209	21.4031	21.6731	21.4828	21.0473	20.9933
7B2_HUMAN	SVPHFSDEDKDPE	22.34	0.441	2.88	0.00623	8.32	0.00623	22.2466	22.4962	22.4383	22.7402	22.6156	22.6853	22.824	22.6593	22.6963	22.6844	22.1714	22.2366	22.3918	22.5836	22.5023	22.4035	22.8513	22.8419	22.5015	22.6157	22.2124	22.307	22.2533	22.0604	22.3731	22.4925	20.9928	21.3151	22.3446	22.4959	21.6321	21.826	22.3887	22.4154	22.3977	22.5046	22.4432	22.221	21.8871	21.8047
7B2_HUMAN	KSVPHFSDEDKDPE	19.27	0.46	2.63	0.01189	6.93	0.01189	19.16	19.0195	19.4504	19.5135	19.6144	19.5353	20.2129	19.8952	19.8256	19.5225	18.9935	19.3976	19.3569	19.5006	19.5847	19.2642	19.8138	19.7427	19.3252	19.354	19.0101	19.153	19.2983	19.2312	19.4706	19.2853	18.5262	18.5868	19.2008	19.1878	18.5706	18.7331	19.206	19.2665	19.4635	19.5895	19.5846	19.2079	18.2889	18.0297
7B2_HUMAN	TADDGCLENTPDTAEFSR	18.8	0.341	1.66	0.10533	2.76	0.10533	18.8279	18.8538	19.3697	19.6736	NA	18.8107	18.7243	18.9605	19.3745	19.3086	18.1599	18.6077	18.6074	18.728	18.7936	18.9783	19.5571	19.5068	18.6051	18.8038	18.474	18.8877	18.0782	18.4493	NA	18.4593	NA	NA	18.9543	18.9217	17.6425	17.5484	19.2557	19.2285	19.0056	19.0347	19.1381	18.9167	18.1696	18.3929
7B2_HUMAN	DFSEDQGYPDPPNPCPVGK	19.61	0.451	1.78	0.08371	3.15	0.08371	19.9528	20.1136	19.8845	19.939	19.9021	20.1543	19.7161	20.1019	19.7849	19.8663	18.8722	18.7929	19.0458	19.517	19.7289	19.9979	20.6927	20.4739	19.6655	20.1798	19.5307	19.8285	19.3194	19.7755	19.2936	19.7385	NA	NA	19.0569	19.312	17.8478	18.1849	19.4314	20.1609	19.514	19.4333	19.4656	19.4816	19.6826	19.5613
7B2_HUMAN	EFQLHQHLFDPEHDYPGLGK	19.94	0.19	0.94	0.35165	0.89	0.35165	20.1825	NA	21.1552	20.8352	19.4572	19.5063	20.0077	20.1919	20.163	20.0592	19.7674	19.825	19.9836	19.8646	20.2243	20.3055	19.4558	NA	19.9657	19.8536	20.2002	NA	19.3153	NA	19.5636	19.7782	19.2087	19.0181	20.2822	20.073	19.0226	19.0373	20.0481	20.1562	20.7068	20.5625	19.9389	20.4055	19.9314	NA
A1AG1_HUMAN	TEDTIFLR	22.65	-0.773	-4.1	0.00019	16.83	0.00019	22.2782	22.4347	21.0497	21.1113	22.1652	22.2128	22.2401	22.2717	21.3867	21.4015	22.6322	22.6628	22.9834	23.0921	22.4521	22.3567	22.5985	22.7076	22.56	22.6959	22.7496	22.8399	22.7878	22.9629	23.2166	23.1179	23.7779	23.6659	23.6887	23.6421	23.398	23.3615	21.8605	21.9747	22.9735	22.9703	23.0217	22.9578	22.8915	22.8921
A1AG1_HUMAN	SDVVYTDWK	23.1	-0.996	-4.19	0.00014	17.59	0.00014	22.8196	22.7038	20.4598	20.5778	22.4525	22.2961	22.9174	22.9423	21.8476	21.7121	23.0717	23.1251	23.4825	23.5068	22.9662	22.8816	22.9916	22.8757	23.1669	23.1939	23.1301	23.1809	23.3706	23.4242	23.6397	23.5583	24.468	24.4392	24.3139	24.2788	24.0894	24.0654	22.4509	22.4377	23.5316	23.513	23.7537	23.5172	23.4031	23.3515
A1AG1_HUMAN	WFYIASAFR	22.26	-1.374	-3.63	0.00079	13.14	0.00079	21.5146	21.647	21.6032	21.3928	21.233	20.9542	21.8205	21.9633	21.1973	21.2091	22.8957	22.8372	23.2731	22.9182	22.1669	22.6982	19.1384	17.8938	21.4964	21.594	22.412	22.1058	22.3865	22.3777	22.8426	22.5038	24.317	24.4611	23.9277	23.921	23.4048	23.3817	21.8859	21.8717	23.3555	23.0788	22.8537	23.1503	22.2403	22.4453
A1AG1_HUMAN	SDVVYTDWKK	19.89	-0.877	-2.76	0.00878	7.61	0.00878	19.6372	19.354	NA	NA	19.2953	18.9896	20.0673	19.5186	17.932	18.0568	19.8587	19.7247	20.4145	20.2067	19.2888	19.4462	19.6542	19.034	19.8045	19.5046	19.711	19.3978	20.5234	19.5028	20.7429	20.5572	21.6271	21.1916	21.2162	21.14	21.1823	20.9728	18.8479	18.5599	20.1836	20.2972	20.1912	20.1632	20.2347	19.9501
A1AG1_HUMAN	TYMLAFDVNDEK	23.13	-0.784	-2.02	0.04998	4.08	0.04998	23.6866	23.2632	21.049	21.3734	22.972	22.9824	23.5246	22.9597	21.5528	21.3306	22.9947	22.2663	23.3922	23.3716	23.1839	21.9097	23.1489	22.8745	23.9091	23.03	23.4817	23.3054	24.0955	23.4845	24.1055	24.0323	24.294	23.9526	24.0322	23.4561	24.2141	23.8261	22.7234	21.7693	22.7693	22.73	23.3325	22.571	24.3429	23.9306
A1AG1_HUMAN	NWGLSVYADKPETTK	23.89	-0.828	-4.31	0.0001	18.61	0.0001	23.7016	23.4971	22.7987	22.7901	23.0301	22.9241	23.7513	23.7594	22.701	22.669	23.9824	23.9593	24.2347	24.2112	23.5391	23.6179	23.3537	23.1418	23.9307	23.9151	23.8266	23.8664	23.9655	24.0171	24.2539	24.2052	25.3127	25.1493	25.0824	24.9989	24.8701	24.7396	23.1044	23.1772	24.2991	24.2985	24.3014	24.2786	24.1547	24.1591
A1AG1_HUMAN	EQLGEFYEALDCLR	24.45	-0.961	-4.69	3e-05	21.99	3e-05	24.0996	24.2089	23.2633	23.3062	23.656	23.7787	24.0599	24.1799	23.1824	23.2435	24.624	24.652	24.9007	24.8754	24.0908	24.169	23.4738	23.0564	24.3364	24.1827	24.3966	24.4656	24.3941	24.4463	25.1045	24.9821	25.7445	25.8489	25.6037	25.5245	25.4371	25.3638	24.024	24.0027	25.1303	24.9578	24.8731	25.0267	24.4306	24.8025
A1AG1_HUMAN	YVGGQEHFAHLLILR	23.14	-0.819	-1.58	0.12111	2.51	0.12111	23.2063	23.2032	22.2428	22.095	22.5479	22.7959	23.061	23.1831	21.8401	21.7928	23.3056	23.3212	23.645	23.579	22.6209	22.8275	21.6848	21.4679	23.0292	23.1263	23.3253	23.3522	23.4068	23.4802	24.0656	23.9394	20.9026	24.6824	24.5437	24.4797	24.2086	24.0244	22.2256	22.3117	24.0067	23.8844	23.4127	23.6727	23.5064	23.5328
A1AG1_HUMAN	NWGLSVYADKPETTKEQLGEFYEALDCLR	21.21	-0.975	-2.43	0.01966	5.92	0.01966	20.555	19.9302	21.297	20.977	19.6474	19.3042	20.8192	20.8703	19.8896	19.8247	21.9365	21.6114	22.1258	21.5036	20.8531	21.1542	NA	NA	20.1826	20.008	20.6583	19.8554	21.8107	21.6421	20.9309	20.5633	24.0119	23.9827	23.0424	22.8385	22.5872	22.5364	20.025	19.6173	22.1504	21.8834	21.4041	21.9245	20.8387	21.0786
A1AG2_HUMAN	SDVMYTDWK	21.74	-0.477	-2.41	0.02048	5.81	0.02048	21.5158	21.2833	22.3716	22.3702	21.2577	20.9469	21.2398	21.3008	20.6383	20.5223	21.8083	21.8566	22.1148	22.0482	21.7478	21.7662	21.4396	21.1986	21.2285	21.2818	22.0088	21.9605	22.0575	22.0142	22.2023	22.7058	22.9134	22.762	22.2996	22.1694	22.356	22.2729	21.0813	20.9517	21.9301	21.8689	21.2708	21.2896	21.6749	21.6828
A1AG2_HUMAN	EHVAHLLFLR	20.35	-0.817	-3.51	0.0011	12.33	0.0011	20.4261	20.4596	19.2295	18.9864	19.8357	19.9544	20.0462	20.0871	19.422	19.7523	20.6795	20.8873	21.0917	21.0146	19.9117	20.2847	18.7761	18.86	19.6511	19.4263	20.8705	20.8363	20.3318	20.3721	20.9867	21.0344	21.8314	21.6573	21.0503	21.2059	21.4171	21.1009	19.6197	19.6972	21.0588	20.9186	20.0194	20.2271	20.4138	20.4712
A1AG2_HUMAN	TLMFGSYLDDEK	22.03	-0.58	-3.13	0.00319	9.82	0.00319	21.9429	21.9497	20.7218	20.7342	21.6233	21.5143	21.693	21.8161	21.2072	21.0333	22.3694	22.2399	22.5533	22.5539	22.0465	22.072	21.6941	21.6953	21.6473	21.7368	22.3964	22.4703	22.2767	22.3771	22.5639	22.5514	23.2458	23.1661	22.6847	22.5862	22.757	22.4777	21.4346	21.5703	22.3465	22.2702	21.3883	21.5619	22.241	22.0878
A1AG2_HUMAN	NWGLSFYADKPETTK	22.2	-0.049	-0.1	0.91914	0.01	0.91914	22.2406	21.9934	NA	NA	22.0043	22.0028	22.3779	22.3032	21.8456	NA	23.1452	22.1664	22.8725	21.4802	22.548	22.577	21.7574	21.4192	21.9508	22.1256	22.6589	22.616	22.684	22.7565	22.6976	22.6234	NA	NA	NA	NA	22.8712	23.0809	21.6922	21.8693	NA	21.3342	19.9547	22.2488	22.335	22.301
A1AG2_HUMAN	EQLGEFYEALDCLCIPR	21.93	-0.773	-2.81	0.00764	7.87	0.00764	21.5625	21.7128	21.0403	21.2555	20.9947	21.3185	21.4507	21.6075	21.3759	21.4849	22.6399	22.5624	22.6611	22.4536	22.1017	22.1678	20.498	19.4564	21.5044	21.0418	22.2263	21.8807	21.8846	21.9428	22.1738	22.4032	23.3302	23.3592	22.6377	22.627	22.7917	22.7006	21.8351	21.9442	22.6911	22.439	21.4752	21.918	21.8561	22.2292
A1AT_HUMAN	SVLGQLGITK	17.16	NA	NA	NA	NA	NA	NA	NA	NA	NA	NA	NA	NA	NA	NA	NA	NA	NA	NA	NA	NA	NA	NA	NA	NA	NA	NA	NA	NA	NA	NA	17.1578	NA	NA	NA	NA	NA	NA	NA	NA	NA	NA	NA	NA	NA	NA
A1BG_HUMAN	CLAPLEGAR	20.36	-0.052	-0.24	0.81521	0.06	0.81521	19.8201	19.9844	19.5569	19.6635	20.5926	20.6566	20.6278	19.8803	19.8466	19.9397	20.7156	20.6209	20.7762	20.7941	20.3822	20.3798	20.7511	20.611	20.5539	20.5408	20.6114	20.3617	21.2097	20.4055	20.6847	20.797	20.9568	20.8412	20.2267	20.2468	20.5621	21.0073	19.806	19.9418	19.9094	19.8892	20.5554	20.1074	19.8954	19.7152
A1BG_HUMAN	ATWSGAVLAGR	21.47	-0.172	-1.12	0.27035	1.25	0.27035	21.347	21.2572	20.5629	20.5358	21.5114	21.3637	21.6508	21.6581	20.911	20.8935	21.8109	21.5878	21.7729	21.8079	21.5825	21.4905	21.5694	21.4149	21.4565	21.4837	21.7403	21.7843	21.9489	22.0235	21.7485	21.6621	22.3223	22.206	21.2883	21.1862	21.9608	21.9126	21.0902	20.8802	21.1091	21.1096	21.4626	21.3458	21.1414	21.1885
A1BG_HUMAN	SGLSTGWTQLSK	22.04	-0.114	-0.68	0.50109	0.46	0.50109	21.8462	21.9203	21.19	21.3879	21.9061	21.9117	22.0934	22.2817	21.7938	21.5731	22.3746	22.4647	22.2538	22.4254	21.982	22.0206	22.038	22.0812	22.0458	22.1591	22.2892	22.3603	22.4547	22.5772	22.1113	22.1746	23.0518	23.1818	21.8078	21.8727	22.4469	22.6117	21.2598	21.4688	21.5849	21.4899	22.0538	21.905	21.6271	21.6958
A1BG_HUMAN	HQFLLTGDTQGR	22.64	0.066	0.17	0.86813	0.03	0.86813	22.373	22.3066	22.2343	22.0291	22.7215	22.6203	23.2172	22.671	22.2849	22.3411	23.1329	22.961	23.1331	23.017	22.8539	22.737	22.7355	22.367	22.9156	22.7916	23.0116	22.5897	23.3966	22.6522	23.0026	22.9877	23.3894	20.6773	22.7119	22.6528	22.818	23.1185	22.2757	22.2274	22.4288	22.3099	22.935	22.6278	22.4168	21.8948
A1BG_HUMAN	CEGPIPDVTFELLR	20.99	-0.358	-1.86	0.06987	3.46	0.06987	20.8153	20.8162	20.5909	20.3913	20.4182	20.545	20.8494	20.9719	20.5694	20.6299	21.4959	21.6892	21.5667	21.5149	21.1067	20.9278	19.9756	19.5987	20.7805	20.9346	21.1665	21.0852	21.2836	21.4062	21.2609	21.1926	22.1041	22.4109	20.9202	20.8646	21.6775	21.7284	20.7344	20.5973	20.7752	20.6007	20.9129	21.0123	20.7152	20.8953
A1BG_HUMAN	NGVAQEPVHLDSPAIK	21.89	-0.053	-0.3	0.76315	0.09	0.76315	21.8006	21.8926	21.0573	21.0304	21.8985	21.9368	22.1667	22.2825	21.3851	21.44	22.2329	22.1939	21.9425	22.1649	21.8295	21.7771	22.0711	22.1095	21.8327	22.1657	22.0559	22.2083	22.2974	22.5196	21.9454	22.0626	23.0383	22.8658	21.6171	21.5537	22.2887	22.3745	21.1382	21.1729	21.3932	21.3934	21.6392	21.5727	21.499	21.6305
A1BG_HUMAN	LELHVDGPPPRPQLR	18.98	-0.25	-0.97	0.3393	0.93	0.3393	19.106	18.7788	18.239	18.0092	18.5524	18.369	19.5075	19.547	18.0836	18.094	19.6431	19.759	19.4901	19.3097	18.5969	18.5953	18.6574	18.6971	19.3199	18.7715	19.4652	19.3134	19.2257	19.3532	19.319	19.439	21.0337	20.5564	18.775	18.6135	19.9345	19.5657	17.9749	17.7353	18.8211	18.5014	18.6326	18.8434	18.6078	18.4251
A1BG_HUMAN	VTLTCVAPLSGVDFQLR	23.7	-0.323	-1.81	0.07698	3.29	0.07698	23.2038	23.4181	23.4777	23.4134	23.2671	23.1493	23.5285	23.5259	23.3396	23.512	24.2728	24.2811	24.1688	24.0843	23.6861	23.7949	22.94	22.5147	23.6359	23.5073	23.9384	23.6251	23.8034	23.8429	23.767	23.7629	24.7763	25.0122	23.9758	24.0436	24.0863	24.1261	23.5198	23.5185	23.6495	23.32	23.6492	23.7296	23.4106	23.6208
A1BG_HUMAN	IFFHLNAVALGDGGHYTCR	22.28	-0.313	-0.89	0.37719	0.8	0.37719	22.5245	22.3532	19.9223	20.9821	22.3889	22.3327	22.945	22.8703	21.9177	21.9164	22.5275	22.8272	22.8256	22.872	22.803	22.6349	20.5903	20.0388	22.7062	22.5423	23.0427	22.7701	23.1893	23.0129	22.9387	22.8042	23.0401	23.3632	22.3083	22.2258	23.23	23.1253	21.6983	21.8283	20.4342	21.2495	21.574	22.2736	22.5969	22.0672
A1BG_HUMAN	SLPAPWLSMAPVSWITPGLK	21.56	-0.853	-1.3	0.20046	1.69	0.20046	21.224	20.9416	22.0183	22.177	19.8406	19.6981	21.3833	21.742	21.303	21.2391	22.9499	22.7817	22.2537	22.196	21.8503	22.3573	19.0218	14.9024	21.4877	21.3682	21.6178	21.2115	21.8246	21.9031	21.6104	21.2684	23.3545	23.8411	22.1923	22.2387	22.2776	22.3639	21.6992	21.6739	21.4789	21.5451	21.8671	22.4472	21.6635	21.7261
A1BG_HUMAN	TPGAAANLELIFVGPQHAGNYR	22.64	-0.391	-1.17	0.24885	1.37	0.24885	22.7531	21.1584	22.3707	22.1013	22.2356	22.1017	23.0031	22.7056	22.3752	22.4009	23.6268	23.33	23.2782	22.9295	22.6255	22.8493	21.1408	20.543	23.0123	22.3724	22.972	22.51	23.0185	22.5968	22.7989	22.3447	24.1143	24.0014	22.9601	22.8202	23.3939	23.2438	22.5802	22.4179	22.7373	22.8083	22.8049	22.7041	22.1454	21.7703
A1BG_HUMAN	SWVPHTFESELSDPVELLVAES	22.34	-0.384	-1.31	0.19608	1.73	0.19608	22.0712	21.8783	22.4509	22.1577	21.4102	21.0352	22.3131	22.6008	21.955	21.9241	23.2237	23.0399	23.0034	22.7706	22.5872	22.8563	19.6882	NA	22.3253	22.3921	22.2789	21.9987	21.9613	22.4174	22.1897	22.0554	23.7967	24.0197	22.4635	22.5195	22.772	22.9921	22.2092	21.9108	21.778	21.8014	22.1992	22.7367	22.5758	22.7383
A1BG_HUMAN	LHDNQNGWSGDSAPVELILSDETLPAPEFSPEPESGR	21.96	-0.422	-1.37	0.17723	1.89	0.17723	21.6396	21.7682	21.543	21.5224	21.091	21.0012	22.0862	22.2018	21.6924	21.7723	22.8303	22.7425	22.662	22.3492	22.161	22.1815	20.532	19.0383	22.1737	21.9414	22.1354	21.7386	22.2693	22.2194	21.9627	21.889	23.3788	23.4334	21.8482	21.7686	22.6441	22.7924	21.9137	21.749	22.0059	21.7592	21.8298	22.2036	21.7383	22.0838
A1BG_HUMAN	TDGEGALSEPSATVTIEELAAPPPPVLMHHGESSQVLHPGNK	19.16	-0.217	-0.62	0.54063	0.38	0.54063	18.995	NA	NA	NA	NA	NA	18.2608	18.4823	NA	NA	19.4327	19.5613	19.4991	19.1835	NA	18.1762	NA	NA	19.0766	19.0872	18.8691	19.4002	19.5251	19.4454	NA	18.6682	20.8037	20.6991	NA	18.3864	20.4412	20.1649	NA	18.046	NA	NA	18.5042	18.4582	NA	18.7671
A2AP_HUMAN	FDPSLTQR	17.44	0.571	0.72	0.47868	0.52	0.47868	16.9203	17.2597	16.0626	16.6618	18.177	18.1639	NA	16.5975	NA	NA	15.9916	NA	NA	15.7296	NA	NA	21.2466	21.2592	18.7557	18.95	16.4672	15.9845	20.108	17.4686	NA	18.1885	14.2758	NA	NA	15.2811	17.5189	17.9733	NA	NA	17.0627	15.7606	18.5093	NA	17.3181	17.1325
A2AP_HUMAN	NKFDPSLTQR	16.02	0.158	0.48	0.6342	0.23	0.6342	NA	NA	NA	NA	15.3092	NA	NA	NA	NA	NA	NA	NA	NA	16.1314	15.5512	NA	17.0323	16.6873	NA	16.1746	16.1929	15.7477	15.3109	NA	16.2391	NA	16.433	16.4241	NA	NA	16.1161	16.1373	NA	NA	NA	15.0533	NA	15.8198	NA	NA
A2AP_HUMAN	LGNQEPGGQTALK	19.51	0.143	0.51	0.61335	0.26	0.61335	18.6764	18.9711	18.4757	18.8692	19.6674	19.7716	19.4482	19.5131	19.6302	19.501	19.5085	20.0047	19.6781	20.1398	19.5976	19.3457	20.2489	20.5008	19.8273	20.2679	19.3691	19.7532	19.8355	20.0053	19.6049	19.8258	20.4817	20.9705	18.7506	19.138	19.7611	20.1687	18.4888	18.7329	18.8438	19.0743	19.8077	19.0603	18.3648	18.7526
A2AP_HUMAN	QEDDLANINQWVK	18.98	0.267	0.81	0.42803	0.65	0.42803	NA	NA	17.6108	17.9283	NA	NA	NA	NA	18.4053	18.3572	19.2832	NA	19.42	NA	19.4104	19.4545	19.6465	19.491	20.0376	20.3029	NA	NA	NA	NA	NA	NA	19.4311	NA	18.514	18.4868	19.5181	19.9038	18.1966	18.4973	18.2641	18.1647	19.0546	19.1216	NA	NA
A2AP_HUMAN	LQQVLHAGSGPCLPHLLSR	20.11	-0.195	-0.98	0.33308	0.96	0.33308	19.9229	19.7951	19.2502	19.1957	19.716	19.6933	19.9561	20.092	19.8757	19.6553	20.2826	20.7295	20.3425	20.4695	20.28	20.166	19.8912	20.0137	20.4422	20.4462	20.6361	20.6588	19.9514	20.2343	20.4281	20.4499	21.6015	21.3529	20.0263	19.9014	20.3978	20.5298	19.0322	19.2593	19.999	20.0845	20.3174	20.2483	19.5625	19.4377
A2AP_HUMAN	WFLLEQPEIQVAHFPFK	19.84	-0.476	-1.33	0.18969	1.78	0.18969	18.2661	18.4991	20.3371	20.0818	18.0094	17.7145	18.0976	18.9138	19.8591	19.72	20.7402	20.9487	20.6429	20.4793	20.1577	20.4098	NA	NA	19.8828	19.8669	19.7884	19.5853	19.1793	19.5402	19.486	19.8248	21.6125	21.771	20.2756	20.2164	20.5159	20.4599	19.421	19.7694	20.331	19.979	20.3174	20.9264	18.7603	19.5585
A2AP_HUMAN	EDFLEQSEQLFGAKPVSLTGK	17.27	-2	-2.19	0.09437	4.79	0.09437	NA	NA	NA	NA	NA	15.933	NA	NA	NA	NA	NA	NA	NA	NA	NA	NA	NA	NA	NA	NA	NA	NA	NA	NA	NA	NA	17.7484	18.1169	NA	NA	NA	NA	NA	NA	NA	NA	NA	NA	NA	NA
A2AP_HUMAN	GFPIKEDFLEQSEQLFGAKPVSLTGK	20.55	-0.386	-1.72	0.09321	2.95	0.09321	20.1257	19.9983	19.8458	20.0061	19.6388	19.9996	20.0491	20.0423	20.5266	20.6694	21.1053	21.1505	20.8272	20.6712	20.9099	20.7325	19.7872	18.9831	21.2251	20.9371	20.7558	20.5555	20.5317	20.325	20.5434	20.6993	21.6383	21.827	20.5992	20.4603	21.2211	21.0655	20.4467	20.2879	20.8188	20.4711	21.0458	21.0904	20.1796	20.3892
A2GL_HUMAN	GQTLLAVAK	20.15	-0.949	-2.51	0.02246	6.31	0.02246	NA	NA	NA	NA	NA	NA	NA	NA	NA	NA	NA	NA	19.4613	19.4171	NA	NA	19.1153	NA	NA	NA	19.763	NA	20.1788	NA	21.1512	21.0854	NA	20.0429	21.0817	21.0124	19.9628	20.3374	NA	NA	20.1774	20.0894	NA	19.7874	19.7522	NA
A2GL_HUMAN	YLFLNGNK	19.51	-1.393	-3.18	0.00301	10.09	0.00301	18.4781	NA	NA	NA	19.4548	19.5871	19.0556	16.889	NA	16.6798	18.0393	18.4884	19.2444	19.6539	18.9684	19.6004	18.801	19.3428	18.9832	19.4855	19.779	20.0741	20.0538	20.4337	20.9564	21.1198	20.5344	20.0773	20.968	20.9	20.2557	20.3688	18.2422	18.4745	19.8948	19.9444	19.8548	20.037	19.6393	19.8393
A2GL_HUMAN	VAAGAFQGLR	19.72	-1.292	-4.99	1e-05	24.91	1e-05	19.0602	19.0952	17.8381	17.7258	19.9923	19.999	19.3938	19.3584	17.4246	17.5956	18.855	18.7947	19.7422	19.7426	19.6573	19.6293	19.3394	19.3318	19.5255	19.3873	20.2122	20.2056	20.5528	20.5352	21.4281	21.3011	20.3534	20.7078	21.2968	21.1409	20.924	20.7321	18.8977	18.6149	20.3243	20.0868	20.2947	20.0761	19.9072	19.7453
A2GL_HUMAN	ALGHLDLSGNR	18.37	-0.766	-2.48	0.01764	6.16	0.01764	16.8836	17.9133	18.1436	18.3087	17.919	17.783	17.8305	17.3134	18.1317	18.253	NA	NA	18.3608	18.163	17.7602	18.0578	18.1774	18.2388	17.9513	18.2388	18.4711	18.1981	18.258	17.2868	19.7453	19.9563	18.7301	19.1978	19.6691	19.6733	18.7885	19.2218	NA	18.2478	18.2088	18.9194	18.5371	18.6443	18.4207	18.1953
A2GL_HUMAN	DLLLPQPDLR	19.92	-1.168	-4.73	3e-05	22.37	3e-05	19.6117	19.5763	17.939	17.9113	20.0688	20.0772	19.5869	19.8191	18.037	17.9084	19.1014	18.9767	20.1519	20.0188	19.7858	19.726	19.5415	19.684	19.6326	19.6415	20.3124	20.2217	20.4144	20.534	21.6006	21.6242	20.8089	20.8087	21.319	21.2472	21.0183	20.8877	19.0885	19.1232	20.4971	20.2867	20.1184	20.0918	20.289	19.8672
A2GL_HUMAN	ENQLEVLEVSWLHGLK	20.62	-1.59	-5.39	0	29	0	19.8615	20.155	19.4729	19.5074	19.9888	20.3121	20.1762	20.199	18.9486	18.826	20.1234	19.9813	20.8246	20.438	20.6325	20.5674	17.2633	NA	20.1911	20.0008	21.1642	20.6805	21.0744	21.0165	21.9341	21.9508	22.2133	22.2438	22.1903	22.1065	21.6546	21.6825	20.1395	19.7696	21.7493	21.4214	21.0806	21.2054	20.6983	20.9202
A2GL_HUMAN	TLDLGENQLETLPPDLLR	19.19	-1.771	-5.98	0	35.71	0	18.2741	18.7334	16.7616	17.208	18.9801	19.154	18.4579	18.6442	16.617	16.801	18.1355	18.3171	19.3047	19.3011	18.9226	19.0988	17.9925	17.6489	18.8259	18.8772	19.4633	19.48	19.7521	19.8313	21.2503	21.178	20.4374	20.7202	21.0183	21.0818	20.6197	20.5794	18.5801	18.6703	20.3653	20.0413	19.6536	19.9941	19.1357	19.6256
A2GL_HUMAN	NALTGLPPGLFQASATLDTLVLK	19.19	-1.636	-3.32	0.00218	11	0.00218	NA	NA	17.3706	17.1379	17.7133	16.7637	19.2449	19.5072	NA	NA	18.2975	17.966	19.9577	19.9996	19.7335	19.9432	15.4906	NA	18.0665	18.562	18.2657	17.4764	19.9497	20.0184	20.9079	20.8465	21.6437	21.9574	NA	NA	19.5529	19.7634	19.5604	19.0743	19.477	19.2653	20.1759	20.5232	19.5395	19.5583
A2GL_HUMAN	DGFDISGNPWICDQNLSDLYR	18.39	-1.658	-4.05	0.0003	16.37	0.0003	NA	16.4877	16.6039	NA	16.3394	NA	NA	17.5947	NA	NA	17.2126	17.2983	18.6617	17.8806	17.9291	18.7709	NA	NA	17.2802	17.356	17.9715	17.5266	17.871	18.008	19.4572	19.5119	19.845	20.0843	20.1697	20.0337	19.5071	19.7058	17.6016	17.8143	19.5968	19.2423	18.6041	19.5654	18.0291	18.9627
A2GL_HUMAN	LQELHLSSNGLESLSPEFLRPVPQLR	20.76	-1.521	-5.74	0	32.92	0	20.3641	20.277	NA	19.4221	20.1655	20.2785	20.392	20.2833	19.0613	19.2381	20.1149	20.0585	20.9858	20.6915	20.6309	20.6856	18.6009	17.9487	20.3841	20.2859	20.9854	21.0475	21.1958	21.0957	22.2409	22.0833	22.0211	21.9969	22.3748	22.4262	22.0306	21.7173	20.2717	20.1721	21.9165	21.5796	21.2406	21.5214	20.7679	21.0975
A2MG_HUMAN	TGTHGLLVK	21.1	-0.128	-1.03	0.31129	1.05	0.31129	20.8981	21.071	21.1997	21.0143	20.8896	20.8018	21.1192	20.8169	21.251	21.0698	21.0392	21.3262	21.021	21.1827	20.995	21.1293	20.9601	20.7519	21.1946	20.943	21.1015	21.1136	21.4566	21.4529	21.1608	21.1031	21.4084	21.1565	21.2611	21.1948	21.2504	21.2335	21.0346	21.1358	20.8771	20.8518	21.1823	21.0762	21.1332	21.0409
A2MG_HUMAN	FQVDNNNR	18.13	0.291	0.28	0.77835	0.08	0.77835	18.0119	18.4742	15.9955	19.0489	19.3028	19.1236	17.0266	18.6304	19.3821	18.2585	16.6214	18.9594	16.9643	19.0563	19.2853	NA	17.6842	19.2803	19.3333	15.5993	17.1155	18.991	17.2387	19.7925	17.6927	18.6101	18.792	NA	16.9581	19.1401	18.9852	19.1897	16.9883	15.9826	15.5717	NA	19.2641	18.7412	17.2392	18.4639
A2MG_HUMAN	SLNEEAVKK	17.57	-0.026	-0.1	0.92068	0.01	0.92068	17.1604	NA	NA	NA	17.3941	17.2693	17.9418	17.8295	17.7323	17.5315	NA	NA	NA	NA	17.524	NA	17.4104	17.8261	17.6566	NA	17.0058	17.4282	NA	NA	NA	17.579	NA	NA	17.592	17.5761	17.9358	17.9013	17.3192	17.3574	NA	NA	18.1529	17.4491	NA	NA
A2MG_HUMAN	ATVLNYLPK	20.26	-0.106	-0.64	0.52258	0.42	0.52258	20.3753	20.4178	19.4945	19.4013	20.27	20.3482	19.7697	19.8186	20.0359	19.9928	19.935	19.8063	20.1434	20.1278	20.2822	20.1912	21.1502	21.2436	20.6713	20.7125	20.4092	20.4904	20.4221	20.4777	20.2858	20.3445	19.5924	19.216	20.1089	20.0663	20.222	20.0271	20.6682	20.5594	20.5258	20.5659	20.3948	20.2984	20.8002	20.8337
A2MG_HUMAN	FEVQVTVPK	20.54	-0.299	-2.38	0.02225	5.65	0.02225	20.3852	20.5572	19.9089	19.8565	20.3449	20.3522	20.1029	19.9106	20.3257	20.4062	20.4935	20.5801	20.4477	20.3662	20.6681	20.4557	20.4422	20.6751	20.7087	20.7876	20.7997	20.8797	20.6109	20.6252	20.4798	20.6429	20.3422	20.2653	20.6109	20.5369	20.5569	20.5706	20.6776	20.7841	21.042	20.9978	20.7315	20.491	21.0543	21.0459
A2MG_HUMAN	GHFSISIPVK	20.25	-0.141	-0.7	0.48816	0.49	0.48816	20.942	20.5873	20.4636	19.9973	20.227	19.8735	20.1692	20.0369	20.2366	20.32	20.0204	20.0677	20.2501	19.8787	20.1203	20.0889	20.0723	19.7544	20.42	20.0224	20.5266	20.4643	20.6069	20.477	20.5578	20.1459	20.5581	20.0274	20.3627	20.2339	20.8018	20.093	20.3803	20.1778	19.9772	19.8932	19.991	20.1389	20.5892	20.356
A2MG_HUMAN	SSGSLLNNAIK	20.79	-0.015	-0.08	0.93697	0.01	0.93697	21.0269	21.1697	20.0315	20.4435	20.6794	20.894	20.756	20.8324	21.0448	20.8815	20.1235	20.2685	20.3374	20.6907	21.0885	20.7998	21.0215	21.493	20.945	21.2031	20.7941	21.1449	21.1866	21.4095	20.7754	20.952	19.8971	20.1461	20.5626	20.6982	20.6595	20.8955	20.6658	20.9046	20.8371	20.9983	20.9922	20.5873	20.861	21.0721
A2MG_HUMAN	QTVSWAVTPK	21.74	-0.112	-0.52	0.60798	0.27	0.60798	22.03	21.8664	20.8674	20.5931	22.076	22.105	21.5963	21.8091	21.4511	21.3561	21.2993	21.2174	21.2066	21.4477	21.3161	21.6102	22.5567	22.7702	22.1543	22.3312	22.0845	22.2642	22.0295	22.1725	21.9174	22.0907	21.3665	21.0261	20.8445	20.9723	22.2784	22.3754	21.2982	21.8386	21.4632	21.2788	21.5997	21.7208	22.6711	22.615
A2MG_HUMAN	SASNMAIVDVK	21.94	-0.094	-0.57	0.57244	0.32	0.57244	21.8707	22.0709	21.9125	22.1812	21.8747	21.9758	21.6187	21.6837	22.0809	22.0004	21.7922	21.7658	21.5266	21.632	21.9004	21.7385	22.0925	22.4178	21.7717	22.0432	21.7621	22.0747	22.5136	22.7043	21.7027	22.1154	21.5562	22.0532	21.7364	21.91	21.7344	21.9458	21.9954	21.9255	21.8516	21.6551	22.2485	NA	21.9763	22.1567
A2MG_HUMAN	QGIPFFGQVR	21.71	-0.157	-1.38	0.1745	1.91	0.1745	21.8875	21.9335	21.4078	21.3005	21.5799	21.427	21.4116	21.5681	21.7904	21.7352	21.7823	21.6096	21.8131	21.7327	21.6593	21.7502	21.5704	21.4845	21.6779	21.5885	21.8555	21.9181	21.9091	22.1566	21.9339	21.9736	21.6728	21.6486	21.6765	21.6527	22.0534	21.948	21.8378	21.8651	21.7193	21.5891	21.3519	21.5745	21.6815	21.8224
A2MG_HUMAN	LPPNVVEESAR	22.08	-0.086	-0.43	0.6726	0.18	0.6726	21.8629	22.0624	22.1705	22.1255	21.567	22.0095	21.6865	21.1489	22.0359	22.2168	22.1926	22.2081	22.2656	21.987	22.1462	22.0454	22.1457	22.2449	22.3681	22.3488	22.2929	21.9616	22.2471	21.9517	21.8561	22.336	21.558	21.4507	22.2616	22.236	22.1871	22.3374	22.2869	21.8385	22.4709	22.5117	22.3357	21.6161	22.4762	22.3372
A2MG_HUMAN	YDVENCLANK	23.04	0.054	0.26	0.79688	0.07	0.79688	22.583	22.5116	22.189	22.2632	23.4525	23.2638	22.6431	22.2943	23.2487	23.1787	23.6211	23.6847	23.6009	23.4999	23.3793	23.2634	23.119	22.8499	23.4031	23.3263	23.5774	23.3822	23.4123	22.8503	23.4381	23.4022	24.1031	23.8157	22.2377	22.2396	23.6931	23.6957	22.3415	22.289	22.4969	22.6395	22.5913	22.6946	22.7777	22.6075
A2MG_HUMAN	LSFYYLIMAK	18.43	-0.498	-1.41	0.16537	2	0.16537	18.4292	18.199	19.3557	19.1393	17.6468	17.0038	18.1205	17.8918	18.9682	19.0264	18.9291	18.5471	18.8634	18.2138	18.8538	18.645	15.2387	NA	17.9039	17.5182	18.754	17.943	18.9072	18.4665	18.2731	17.6337	19.309	19.2241	18.9068	18.3835	18.98	18.7577	19.0391	18.51	18.6705	18.1362	18.6635	18.5854	18.4181	18.5625
A2MG_HUMAN	VGFYESDVMGR	22	-0.178	-1.75	0.08705	3.07	0.08705	22.1977	22.1058	21.8567	21.883	21.6063	21.6127	21.7411	21.9137	22.1298	22.0647	21.8591	21.9532	21.9269	21.9203	21.9458	22.0342	21.7418	21.7136	22.021	22.081	22.1492	22.2764	22.3276	22.4931	22.179	22.1297	22.0631	22.0643	22.0528	22.079	22.3129	22.2184	21.9078	21.9651	21.8187	21.7929	21.925	22.0096	22.0636	22.0362
A2MG_HUMAN	VTAAPQSVCALR	21.75	-0.291	-1.72	0.09325	2.95	0.09325	21.5934	21.7248	21.0086	20.9733	21.8373	21.7626	21.5693	21.0043	21.4944	21.6514	21.5145	21.6176	21.5439	21.6871	21.5192	21.5123	22.1882	22.1847	21.8396	21.7912	22.2408	22.1445	21.8679	21.6689	22.2433	22.278	21.0084	20.8258	21.7897	21.8647	21.5045	21.8537	21.7243	21.7849	22.5943	22.6237	21.911	21.8004	22.1007	22.0092
A2MG_HUMAN	NALFCLESAWK	20.05	-0.475	-2.22	0.03224	4.92	0.03224	19.9614	20.0577	19.8355	20.1828	19.5609	19.1861	19.8392	19.7089	19.898	20.1469	20.2243	19.9835	20.2172	19.7442	20.462	20.3436	18.9505	18.2339	20.0648	19.7302	20.5082	20.1946	20.0525	20.0493	NA	20.1117	19.836	19.809	20.288	20.4112	20.1379	20.2197	20.5564	20.4569	21.1704	21.0008	20.1992	20.2873	20.0852	20.311
A2MG_HUMAN	KLSFYYLIMAK	16.04	-0.306	-0.38	0.7071	0.15	0.7071	16.0371	17.0239	NA	NA	15.3555	NA	NA	16.0807	NA	NA	NA	NA	NA	NA	NA	16.429	NA	NA	NA	14.3872	15.1988	NA	15.2604	16.8317	NA	16.1082	NA	NA	NA	NA	NA	NA	NA	NA	NA	NA	NA	NA	16.5777	17.1927
A2MG_HUMAN	NEDSLVFVQTDK	21.55	-0.074	-0.38	0.7082	0.14	0.7082	21.7959	21.8274	20.1768	20.4777	21.6613	21.8225	21.2326	21.3039	21.3109	21.3354	21.37	21.4813	21.426	21.6996	21.5698	21.4947	22.0836	22.3713	21.843	21.9826	21.7369	21.9998	21.4892	21.7974	21.6677	21.8694	20.4838	20.7122	21.2816	21.2715	21.5813	21.6212	21.6278	21.8083	21.9389	22.0234	21.5182	21.1263	21.9589	22.2246
A2MG_HUMAN	MVSGFIPLKPTVK	22.49	-0.16	-1.38	0.17525	1.9	0.17525	22.7308	22.5906	22.7298	22.5027	21.9851	21.9589	22.3672	22.3985	22.6587	22.5806	22.5069	22.4581	22.2975	22.1888	22.2819	22.3435	22.3725	22.2584	22.5293	22.5166	22.6747	22.5807	22.8599	22.9137	22.4525	22.363	22.9821	22.7025	22.7137	22.5892	22.6309	22.5057	22.4936	22.4127	22.3078	22.2473	22.3524	22.4975	22.6199	22.5604
A2MG_HUMAN	HYDGSYSTFGER	20.86	-0.083	-0.56	0.57786	0.31	0.57786	20.8473	20.7479	20.654	20.7314	20.7238	20.5737	21.0477	20.7253	20.9209	20.8481	20.7804	20.6238	20.819	20.7096	21.0495	20.9154	20.8323	20.5381	21.1694	21.0408	20.8566	20.8137	21.5047	20.7359	20.8061	20.7713	20.9825	20.9365	20.7599	20.7667	21.0341	20.9651	20.9766	20.8724	20.752	20.7812	20.9763	20.9028	20.9495	20.8055
A2MG_HUMAN	DMYSFLEDMGLK	22.01	-0.446	-1.97	0.05552	3.88	0.05552	22.1353	21.9496	22.482	22.5064	21.0699	21.1544	21.6615	21.7536	22.2236	22.1405	22.3566	22.3647	22.1962	22.1376	22.1819	22.3566	20.0388	19.3074	21.9036	21.7882	21.8538	22.0777	22.1979	22.0793	22.2715	22.2498	22.426	22.5417	22.1977	22.2505	22.3851	22.3642	22.4202	22.2043	22.0744	21.9876	22.0379	22.3643	22.3445	22.3089
A2MG_HUMAN	NQGNTWLTAFVLK	21.29	-0.242	-1.38	0.17562	1.9	0.17562	21.6057	21.6911	21.5573	21.5369	20.9216	20.8082	21.3426	21.2857	21.3549	21.4663	21.4155	21.217	21.4028	21.1934	21.4715	21.4381	20.2126	19.5999	21.0793	20.8256	21.3662	21.0577	21.7433	21.6425	21.4504	21.3277	21.5884	21.5826	21.398	21.292	21.5917	21.3953	21.4505	21.3043	21.3544	21.1341	21.4521	21.3813	21.2716	21.4855
A2MG_HUMAN	AAQVTIQSSGTFSSK	16.14	0.458	0.56	0.58644	0.31	0.58644	NA	NA	NA	NA	NA	NA	15.1103	NA	NA	NA	16.5553	NA	17.6434	15.4948	17.3408	16.8931	NA	NA	15.7514	NA	NA	NA	16.1692	NA	15.5251	NA	16.2229	NA	NA	NA	14.6087	NA	NA	NA	NA	NA	16.3825	NA	NA	NA
A2MG_HUMAN	LVHVEEPHTETVR	20.61	-0.181	-1.03	0.30771	1.07	0.30771	20.7299	20.7123	19.6686	19.5791	20.3014	20.1934	20.9692	20.6193	20.2659	20.4154	20.5337	20.5229	20.6414	20.6114	20.4791	20.6457	20.9765	20.7813	21.0053	20.7515	20.9848	20.8214	20.6498	20.3224	21.0175	20.9522	19.8699	19.9585	20.4434	20.5028	20.7575	20.6458	20.7183	20.7753	21.3107	21.2792	20.4506	20.7887	21.1416	20.6359
A2MG_HUMAN	VTGEGCVYLQTSLK	16.6	-0.112	-0.24	0.8095	0.06	0.8095	NA	17.1723	NA	NA	16.5097	16.2769	15.8828	15.7825	NA	17.2848	16.4515	NA	16.1917	16.309	16.2188	16.8629	16.1244	16.1559	17.3874	17.4303	16.7358	17.243	16.6951	17.3105	16.3042	16.4501	17.2122	14.8467	17.3716	NA	16.403	16.1747	16.8463	NA	NA	NA	NA	NA	16.7353	16.9485
A2MG_HUMAN	ALLAYAFALAGNQDK	21.14	-0.3	-1.59	0.12012	2.52	0.12012	21.6178	21.5754	21.2035	20.9131	20.9644	21.0658	20.6908	20.7257	21.045	21.3891	21.008	20.8402	21.326	20.9994	21.3643	21.3484	20.1276	19.6755	21.1402	20.814	21.368	21.1673	21.578	21.5048	21.6761	21.3386	21.0524	20.9095	21.2891	21.1011	21.4429	21.0664	21.5273	21.2154	21.4872	21.2214	20.9573	21.2401	21.4053	21.2789
A2MG_HUMAN	IAQWQSFQLEGGLK	20.78	-0.387	-2.22	0.03198	4.93	0.03198	20.7966	20.8226	20.0075	19.9386	20.5093	20.1773	20.5605	20.4133	20.3073	20.2869	20.9686	20.8737	21.0217	20.8331	20.9361	20.6549	20.4088	19.958	21.3584	20.8494	21.1351	21.0757	20.6333	20.7263	21.0025	20.9938	20.444	20.3702	20.673	20.6608	21.0514	20.9614	21.2169	21.2047	21.4941	21.5488	20.7912	20.6649	21.5248	21.2405
A2MG_HUMAN	TEVSSNHVLIYLDK	21.88	-0.155	-1.33	0.19208	1.76	0.19208	21.9088	22.0009	21.8102	21.8746	21.4876	21.6905	21.8572	21.8984	22.2496	22.1223	21.7393	21.7929	21.6597	21.8879	21.7217	21.7311	21.283	21.4757	21.9311	21.9031	22.0004	22.0741	22.1669	22.2804	21.6638	21.9112	22.202	22.1884	21.814	21.8404	22.0943	22.1222	21.8245	21.9646	21.6183	21.6487	21.9045	21.7933	22.0004	22.0087
A2MG_HUMAN	DNSVHWERPQKPK	18.25	0.029	0.09	0.93191	0.01	0.93191	18.9498	17.6679	17.9528	17.6529	17.9603	17.5806	19.5635	18.972	18.2942	18.1056	18.1832	18.2254	18.2925	17.6703	18.8706	18.3258	18.4945	17.6662	18.8047	18.1557	18.2811	17.9245	19.3229	18.7295	18.6835	17.8575	18.685	18.6186	17.757	17.4996	18.7369	18.4141	18.3251	17.9416	18.2598	18.0179	17.8646	17.7014	18.431	17.755
A2MG_HUMAN	TEHPFTVEEFVLPK	22.48	-0.255	-1.66	0.10505	2.75	0.10505	22.6682	22.7103	21.5835	21.4737	22.299	22.2615	22.053	22.304	22.1328	22.0029	22.6375	22.3347	22.5554	22.4707	22.3919	22.4549	22.7064	22.7487	22.6594	22.6533	22.8678	22.9839	22.3182	22.5999	22.8091	22.8287	21.8011	21.8288	22.4132	22.2628	22.6542	22.5294	22.7656	22.7767	23.1903	23.1754	22.2702	22.4303	22.8074	22.8891
A2MG_HUMAN	SSSNEEVMFLTVQVK	18.22	0.393	0.66	0.51046	0.44	0.51046	20.2671	18.8914	17.7567	17.83	19.6172	19.3335	16.7865	17.9921	18.8254	18.6851	18.1475	18.368	18.144	17.8028	17.7296	18.7687	19.0248	NA	17.2374	18.0328	18.1659	17.2993	17.7434	18.7619	20.0733	17.046	17.911	18.5383	18.4154	17.8727	18.5913	18.266	18.0263	18.0009	17.0863	NA	17.0535	17.9288	17.6125	18.703
A2MG_HUMAN	ALLAYAFALAGNQDKR	16.69	-0.371	-0.83	0.41422	0.69	0.41422	17.8479	17.6373	NA	NA	17.0013	17.2791	15.9108	17.1743	15.3114	NA	NA	NA	NA	15.7929	16.1575	16.9899	NA	15.8185	15.2114	16.0344	16.7432	17.0557	17.7139	17.8784	17.1487	17.8236	NA	NA	15.5251	NA	16.9547	16.6267	NA	15.9503	16.4422	NA	NA	15.8033	17.607	17.2981
A2MG_HUMAN	DTVIKPLLVEPEGLEK	21.78	-0.138	-0.76	0.4511	0.58	0.4511	22.1638	22.2372	20.7569	20.6162	21.9373	22.022	21.4454	21.7193	21.5693	21.3218	21.4874	21.3019	21.5342	21.5618	21.6732	21.7684	22.2494	22.3833	22.2211	22.2686	22.254	22.3017	21.8634	21.9634	22.1085	22.1443	20.7287	20.7345	21.5012	21.6534	21.7348	21.6772	21.9166	21.973	22.3603	22.3425	21.3593	21.5668	22.4034	22.4081
A2MG_HUMAN	LLIYAVLPTGDVIGDSAK	22.24	-0.341	-1.78	0.08289	3.16	0.08289	22.1967	22.2154	22.6736	22.4699	21.5307	21.383	21.9207	21.8966	22.6283	22.5984	22.4319	22.3428	22.466	22.2502	22.3079	22.3406	20.9383	20.4082	22.2713	22.1449	22.3419	22.167	22.4561	22.4143	21.9605	21.9483	22.8836	22.9374	22.6373	22.3488	22.5216	22.3512	22.7125	22.3552	22.1481	21.9259	22.3152	22.5238	22.5871	22.7081
A2MG_HUMAN	QFSFPLSSEPFQGSYK	20.38	-0.324	-2.02	0.05027	4.07	0.05027	20.556	20.5631	19.338	19.7078	20.032	20.0203	19.9655	20.2793	20.0032	20.1507	20.4201	20.5245	20.3751	20.3336	20.4162	20.5494	20.1714	20.1111	20.3865	20.4906	20.7071	20.6877	20.0686	20.3341	20.7154	20.591	19.6053	19.9052	20.3414	20.4287	20.4013	20.6274	20.7524	20.8072	21.2067	21.3088	20.3298	20.42	20.7729	20.8607
A2MG_HUMAN	VSVQLEASPAFLAVPVEK	21.44	-0.201	-1.35	0.18517	1.82	0.18517	21.5386	21.4884	21.1714	21.1226	21.0448	20.9198	20.813	20.9239	21.3276	21.544	21.3297	21.4076	21.4982	21.4143	21.5474	21.5836	21.4165	21.126	21.809	21.8487	21.4963	21.1729	21.3494	21.3684	21.1824	20.996	21.2117	21.1973	21.6348	21.604	21.3712	21.0949	22.1105	22.0508	21.9112	21.7618	21.5009	21.6931	22.1505	22.0397
A2MG_HUMAN	FSGQLNSHGCFYQQVK	18.75	-0.059	-0.23	0.81887	0.05	0.81887	19.0326	19.0097	17.3254	NA	18.7004	19.2467	19.0575	18.8655	18.5457	18.4791	18.1312	18.4036	18.1099	18.3027	18.8691	18.4453	19.5511	19.4056	19.6437	19.2077	19.0064	19.0293	19.186	19.0992	18.8614	19.0369	18.1756	17.7174	18.3443	18.2356	18.2797	18.7306	18.4496	18.9463	19.2428	18.877	18.9035	18.3294	19.4455	19.14
A2MG_HUMAN	KDTVIKPLLVEPEGLEK	19.66	-0.281	-1.53	0.13394	2.34	0.13394	20.0132	19.797	18.2915	18.3219	19.3244	19.4322	19.5825	19.6519	19.3446	19.249	19.3593	19.6031	19.2279	NA	19.6472	19.6885	20.1611	20.2138	19.9167	20.0692	20.1172	20.1713	19.678	19.759	19.9154	19.9456	18.9645	18.6632	19.5179	19.3684	19.5043	19.6119	19.8016	19.8102	20.557	20.5414	19.6647	19.6159	20.257	20.3131
A2MG_HUMAN	AFQPFFVELTMPYSVIR	18.03	-0.334	-0.74	0.46324	0.55	0.46324	17.3176	16.8282	19.1688	18.3672	16.2157	NA	16.4681	17.1134	18.5839	17.9034	18.4483	17.962	18.7855	17.9549	18.374	18.9576	NA	NA	17.511	18.1353	17.5766	16.3007	17.4701	17.7218	17.0865	16.3074	18.339	18.892	19.0981	18.565	18.0755	17.9319	18.6549	18.255	18.6286	18.0968	18.2287	18.936	19.304	19.3835
A2MG_HUMAN	LLLQQVSLPELPGEYSMK	21.68	-0.298	-1.62	0.11198	2.64	0.11198	21.939	21.9229	22.157	22.2538	20.9446	20.8986	21.2284	21.2282	21.9006	21.968	21.653	21.7055	21.6243	21.4187	21.9974	21.6792	20.4626	19.9628	21.8682	21.7452	21.737	21.5379	22.1036	22.024	21.659	21.4196	21.7922	21.944	21.9789	21.8657	21.6772	21.7634	22.1472	21.9997	21.891	21.6526	21.6785	21.9313	21.7904	21.9259
A2MG_HUMAN	VDLSFSPSQSLPASHAHLR	22.52	-0.247	-1.78	0.08208	3.18	0.08208	22.832	22.7537	21.9465	21.8336	22.0528	22.1579	22.3936	22.3695	22.3109	22.161	22.5301	22.1524	22.3225	22.3242	22.4965	22.5391	22.6504	22.6328	22.7457	22.6299	22.8559	22.8156	22.4367	22.4739	22.6926	22.5888	22.4449	21.9976	22.4796	22.4194	22.5793	22.4919	22.5959	22.5565	23.2798	23.2119	22.6778	22.6485	22.7487	22.7781
A2MG_HUMAN	MCPQLQQYEMHGPEGLR	22.01	-0.21	-1.56	0.12694	2.43	0.12694	22.2184	21.9989	22.1465	22.1731	21.3051	21.1436	22.0326	21.9947	22.1265	22.118	22.0887	21.8485	21.8578	21.76	21.937	21.9724	21.6323	21.3407	22.2532	22.1358	22.1628	22.0935	22.3995	22.3213	22.0104	21.7925	22.4694	22.2344	22.2238	22.2081	22.1974	22.1248	22.138	21.968	22.1517	21.9428	21.8396	21.7873	22.075	22.1492
A2MG_HUMAN	YSDASDCHGEDSQAFCEK	17.88	NA	NA	NA	NA	NA	NA	NA	NA	NA	NA	NA	NA	NA	17.8	17.6309	NA	17.289	NA	NA	NA	NA	NA	18.8192	NA	NA	NA	NA	NA	NA	NA	NA	NA	NA	NA	NA	NA	NA	NA	NA	NA	NA	NA	NA	NA	NA
A2MG_HUMAN	LHTEAQIQEEGTVVELTGR	20.62	-0.121	-0.39	0.70105	0.15	0.70105	21.0622	20.8125	19.9419	19.45	20.6828	20.8231	20.9931	20.2154	20.5193	20.5076	20.7948	20.12	20.5001	20.4592	21.1154	20.3446	20.7455	20.5051	21.1285	20.4165	20.845	20.6728	21.1047	20.6006	20.6808	20.7805	20.307	19.4761	20.3538	20.2714	20.711	20.439	20.8775	20.5988	20.9625	20.874	21.2797	20.2013	21.5997	20.9188
A2MG_HUMAN	HNVYINGITYTPVSSTNEK	22.03	-0.004	-0.03	0.97413	0	0.97413	22.3515	22.3497	21.7094	21.9418	21.9412	21.8252	22.4081	22.3402	22.1668	22.0951	22.0136	22.2014	21.646	21.8505	21.9649	21.8563	21.9229	21.8306	21.9332	22.115	22.0895	22.2803	22.3355	22.3108	21.8856	21.9062	22.109	22.2829	21.8931	21.9452	22.0856	22.2184	21.8136	21.9484	21.6435	21.719	21.9938	21.8597	22.0461	22.1767
A2MG_HUMAN	KYSDASDCHGEDSQAFCEK	18.35	0.127	0.38	0.70817	0.14	0.70817	NA	NA	NA	16.9416	NA	NA	NA	18.9593	NA	NA	17.7473	18.1982	17.9897	18.0478	NA	18.6383	NA	19.154	18.9764	19.1842	NA	NA	NA	19.1673	NA	NA	NA	17.8619	NA	17.5401	18.4332	18.5046	NA	NA	18.4894	18.7273	NA	17.8973	NA	18.2798
A2MG_HUMAN	DLTGFPGPLNDQDDEDCINR	21.22	-0.063	-0.28	0.78448	0.08	0.78448	21.3473	21.7626	19.7048	20.2521	21.2429	21.2288	20.8024	21.3293	21.2215	20.9216	21.1116	21.1008	21.0464	21.2201	21.252	21.455	21.6085	21.8354	21.478	21.7488	21.4743	21.6921	21.2643	21.6274	21.3965	21.5529	20.0488	20.3367	20.9635	21.0723	21.1769	21.2449	21.3219	21.6787	21.4391	21.5844	20.5992	21.0864	21.8422	21.534
A2MG_HUMAN	EEFPFALGVQTLPQTCDEPK	18.5	0.031	0.1	0.92103	0.01	0.92103	18.1532	19.1355	18.5245	18.8896	18.1882	18.1858	18.5904	18.7085	19.6097	19.8716	18.6425	18.7557	18.1916	18.6104	18.246	18.816	17.806	17.1186	17.7984	18.1624	18.0802	17.567	19.0187	18.8078	18.1404	18.1745	18.11	18.8934	18.7604	18.9763	18.6141	19.2669	18.5103	18.4387	NA	NA	NA	18.1422	NA	18.3674
A2MG_HUMAN	QQNAQGGFSSTQDTVVALHALSK	20.52	0.081	0.42	0.67757	0.18	0.67757	20.7323	20.9905	19.9281	19.8028	20.7759	20.9871	21.0305	20.8206	20.2619	20.5387	19.9629	20.1615	19.9079	20.4586	20.6071	20.391	20.9807	21.0431	20.8773	20.8907	20.7185	20.8456	20.8298	21.0843	20.7248	20.8721	20.4702	20.2274	19.845	19.871	20.4522	20.8781	20.1742	20.4203	19.8041	19.8992	20.4635	20.2363	20.8234	20.8934
A2MG_HUMAN	ETTFNSLLCPSGGEVSEELSLK	20.48	-0.301	-1.16	0.25334	1.34	0.25334	20.0611	20.5686	20.4007	20.2195	20.0893	19.9756	20.2035	20.1811	20.4759	20.6411	20.605	20.5861	20.7707	20.6148	20.5373	20.4559	19.8691	18.6822	21.0134	20.67	20.7927	20.0937	20.6854	20.1345	20.1763	20.0662	20.5184	20.81	20.7505	20.7089	20.2702	20.5373	21.0607	20.8044	20.8373	20.6108	20.6831	21.1847	20.8516	21.0683
A2MG_HUMAN	SLFTDLEAENDVLHCVAFAVPK	23.12	-0.568	-1.87	0.06915	3.48	0.06915	23.0878	23.1517	23.5816	23.4282	22.2756	22.5144	22.6687	22.849	23.2805	23.276	23.4832	23.5509	23.3608	23.2558	23.1614	23.2748	21.3485	19.7657	22.5545	22.7662	23.1784	22.9573	23.3929	23.3222	22.8409	23.1007	23.7554	23.8777	23.5173	23.7631	23.6929	23.456	23.3327	23.3624	23.5174	23.5751	23.2373	23.5971	23.0432	23.4657
A2MG_HUMAN	VVSMDENFHPLNELIPLVYIQDPK	22.36	-0.801	-1.63	0.11121	2.65	0.11121	22.4263	22.1984	22.2608	22.1922	21.5331	21.3543	21.7465	21.9641	22.394	22.2419	22.7731	22.792	22.6372	22.5425	22.6247	22.8273	20.2992	17.0855	22.7046	22.5821	22.6905	22.5948	22.6039	22.3781	22.1913	22.4677	22.5541	22.5602	22.7603	22.7092	22.681	22.6206	23.033	22.8595	23.3656	23.173	22.5935	22.9309	23.0853	23.3465
A2MG_HUMAN	AVDQSVLLMKPDAELSASSVYNLLPEK	20.93	-0.457	-2.36	0.02321	5.56	0.02321	21.2352	21.1143	20.3646	20.4393	20.0013	20.0446	20.5054	20.6351	20.8756	20.9323	20.9465	20.9843	20.7492	20.6379	21.1488	21.0121	20.2177	19.4774	21.5099	21.1823	21.3689	21.1478	21.0245	20.792	21.192	20.9551	20.42	20.537	21.0245	20.9838	21.0403	21.0559	21.5344	21.3209	21.7316	21.548	20.9812	21.1027	21.6453	21.7575
A2MG_HUMAN	YNILPEKEEFPFALGVQTLPQTCDEPK	21.19	-0.246	-1.34	0.18737	1.8	0.18737	21.4827	21.5377	21.3899	21.5529	20.6245	20.8457	20.8291	21.0917	21.5244	21.5189	21.0213	21.0132	21.0077	20.918	21.3114	21.3143	20.0985	19.4749	21.4531	21.3714	21.1276	21.0953	21.6807	21.5988	20.9487	20.8019	21.6961	21.4912	21.2673	21.1352	21.2585	21.3146	21.6782	21.6871	21.1209	20.8558	21.2047	21.4044	21.3522	21.5889
A2MG_HUMAN	SPCYGYQWVSEEHEEAHHTAYLVFSPSK	17.65	0.007	0.01	0.98957	0	0.98957	18.2059	NA	17.3683	NA	NA	NA	17.9358	NA	NA	NA	NA	16.9684	NA	NA	18.183	17.463	NA	NA	NA	17.1484	NA	NA	18.7385	17.5601	NA	NA	17.7738	17.6426	16.7467	NA	17.9394	NA	NA	NA	NA	NA	NA	16.8696	18.5368	17.3166
A2MG_HUMAN	AVDQSVLLMKPDAELSASSVYNLLPEKDLTGFPGPLNDQDDEDCINR	19	-0.747	-2.35	0.0237	5.53	0.0237	19.7013	18.8415	18.9724	18.6292	18.1751	17.2661	17.9679	18.048	18.8249	18.5225	18.6363	19.1912	19.3535	18.8704	19.0388	19.1295	16.3015	NA	19.579	19.6846	19.0481	19.003	18.9703	19.3396	18.8429	18.5642	18.9427	18.8391	19.6082	19.4136	19.6936	19.2665	19.1871	19.3599	19.6166	19.8124	19.1763	19.2147	20.3088	20.1048
A4_HUMAN	VEAMLNDR	19.81	0.429	2.16	0.03771	4.66	0.03771	19.7438	19.9868	20.6869	20.5817	20.1209	20.2007	19.9264	19.4259	20.1068	20.3019	NA	NA	18.8256	19.0681	20.3603	20.3027	20.13	20.1474	20.1887	20.2532	19.4408	19.5415	18.9676	18.7726	19.4427	19.7086	NA	NA	19.8452	19.9057	19.1988	19.4921	19.6788	19.7207	20.1205	20.1938	NA	19.5744	19.8778	19.5711
A4_HUMAN	SQVMTHLR	18.75	0.639	2.25	0.03009	5.06	0.03009	19.7117	19.1219	19.7837	19.9733	18.9435	18.7229	18.964	18.5819	19.2518	18.9853	18.1602	18.7197	17.5761	18.1289	19.4672	19.7517	19.278	18.9115	19.3086	19.2183	18.3779	18.5897	17.3484	17.7308	18.4792	18.7915	16.8742	NA	18.8404	18.794	17.5658	17.7508	18.7025	18.3179	19.3437	19.3483	19.3031	19.261	18.4913	18.7679
A4_HUMAN	WDSDPSGTK	18.31	0.636	2.41	0.02178	5.82	0.02178	17.7534	18.1044	18.8597	19.0763	18.7388	18.6718	NA	18.286	18.9755	18.6914	17.6024	18.0626	NA	NA	19.1182	18.9837	18.7784	19.1001	NA	18.8056	NA	17.9917	NA	18.1754	NA	17.4866	16.3839	NA	18.3713	18.3478	17.6069	17.9685	17.9099	18.302	18.3467	18.6186	19.1301	NA	17.5896	17.6929
A4_HUMAN	QQLVETHMAR	18.98	-0.019	-0.03	0.97494	0	0.97494	18.5407	NA	19.4072	NA	NA	NA	NA	NA	NA	NA	NA	NA	NA	NA	NA	NA	NA	NA	NA	NA	NA	NA	NA	NA	NA	NA	NA	NA	18.8739	NA	NA	NA	NA	NA	19.1122	NA	NA	NA	NA	NA
A4_HUMAN	KAVIQHFQEK	16.91	1.095	2.71	0.01173	7.35	0.01173	17.521	17.5865	18.1216	18.0311	16.787	NA	17.8921	NA	17.5016	17.3917	16.0981	16.77	15.6675	NA	17.0375	17.7965	17.2618	16.8461	17.0263	17.2006	15.5499	NA	15.2089	NA	16.2799	NA	14.4459	NA	NA	NA	NA	16.2202	16.679	NA	17.7678	17.9769	NA	NA	NA	NA
A4_HUMAN	THPHFVIPYR	19.45	0.024	0.06	0.9516	0	0.9516	20.473	20.0378	20.0485	19.8391	NA	NA	NA	19.9417	18.8904	18.8606	NA	19.103	NA	NA	18.7134	19.6405	NA	NA	18.6451	19.2925	NA	NA	NA	NA	NA	19.0977	NA	NA	19.1844	19.0623	NA	NA	19.2066	18.715	20.0229	19.7783	NA	19.8037	20.0509	19.4803
A4_HUMAN	LNMHMNVQNGK	18.22	0.432	1.21	0.23235	1.47	0.23235	18.6831	18.3663	19.4786	19.4618	NA	17.7968	18.5948	18.0102	18.6667	18.9191	18.2284	17.6398	18.0803	17.7863	18.6092	18.8452	18.697	17.9996	18.9006	18.251	18.2566	17.9564	17.4484	15.8467	18.2295	18.097	16.4734	16.6299	18.7745	18.6889	17.7722	17.7467	18.4601	18.3831	NA	19.0147	18.4591	18.6617	18.4593	18.0397
A4_HUMAN	LVFFAEDVGSNK	20.96	-0.503	-0.7	0.51287	0.5	0.51287	NA	NA	NA	NA	NA	NA	NA	NA	NA	NA	NA	NA	NA	NA	NA	NA	NA	20.4879	NA	NA	NA	NA	NA	NA	21.4744	21.3472	NA	NA	NA	NA	NA	NA	NA	NA	NA	20.5377	NA	NA	NA	NA
A4_HUMAN	VESLEQEAANER	21.64	0.573	2.6	0.01301	6.74	0.01301	21.8431	22.3341	22.0759	22.2385	21.8789	22.0763	22.1623	21.4856	22.1432	22.1214	21.5496	21.158	22.0047	21.5776	21.9984	21.8828	22.023	22.1022	21.8545	21.9859	21.2581	21.2231	20.6055	20.575	21.3423	21.6428	19.8312	19.8495	21.6403	21.6829	21.3284	21.3981	21.3813	21.5456	21.8873	22.0807	22.165	22.1621	21.6503	21.7809
A4_HUMAN	GLTTRPGSGLTNIK	20.91	0.501	1.87	0.06891	3.49	0.06891	20.9916	21.2145	21.868	21.9755	21.082	21.1308	21.4025	20.6866	21.2953	21.5368	20.6677	20.6362	20.7772	20.9634	21.2165	21.1721	21.3558	21.2124	21.0195	21.0792	20.9536	20.6224	20.2754	19.4378	20.8585	20.973	19.0695	18.9119	21.2292	21.3493	19.8516	20.6014	21.0781	21.2574	21.615	21.6864	21.2189	21.013	20.7217	20.5409
A4_HUMAN	EVCSEQAETGPCR	16.42	1.474	2.83	0.01519	8.01	0.01519	NA	NA	NA	NA	16.7723	16.7153	NA	16.3462	17.0459	NA	15.1632	NA	NA	NA	NA	16.675	17.1632	17.6002	16.8189	NA	NA	NA	NA	NA	NA	NA	NA	NA	NA	NA	NA	14.9145	NA	NA	NA	NA	NA	15.3505	NA	NA
A4_HUMAN	ISYGNDALMPSLTETK	20.41	0.489	2.12	0.04011	4.49	0.04011	21.1503	21.1364	21.4138	21.5693	20.4072	20.3685	20.5396	20.5945	21.0759	20.9926	19.8642	19.6765	19.5818	19.7008	20.8012	20.7581	20.5745	20.8942	20.9038	21.1247	20.2353	20.5	19.2457	19.5631	20.3238	20.5139	18.3753	18.5729	20.7337	20.7729	19.9045	19.9925	20.5523	20.5556	21.0306	21.0262	20.1936	20.1179	20.6352	20.5013
A4_HUMAN	CLVGEFVSDALLVPDK	20.75	0.188	0.94	0.35493	0.88	0.35493	21.3981	21.3573	21.8058	21.7636	20.4888	20.8531	20.4339	20.3111	21.2025	21.2147	20.8272	20.7026	20.4072	20.3802	21.2015	21.1583	19.9357	19.8859	20.8628	20.5937	20.5732	20.5834	19.8794	19.9694	20.6519	20.6671	19.6348	19.5438	20.9384	20.9812	20.2807	20.2098	21.1676	21.0131	21.5276	21.4374	20.9043	21.0434	20.8625	21.1607
A4_HUMAN	MDVCETHLHWHTVAK	21.34	0.353	0.66	0.51771	0.43	0.51771	22.0944	21.3592	NA	22.2541	21.2952	20.804	22.0975	21.3123	NA	21.7991	NA	NA	21.2635	20.8807	NA	21.6551	21.6194	20.1651	21.8982	21.6194	21.5559	20.6275	21.0745	19.3839	21.6494	21.2094	NA	NA	NA	NA	20.9708	NA	21.5249	21.3435	NA	NA	NA	21.5722	22.0756	21.0685
A4_HUMAN	YLETPGDENEHAHFQK	19.48	0.758	2.91	0.0061	8.49	0.0061	20.41	20.5292	20.1448	20.373	19.7803	19.6901	19.9645	19.889	20.0181	20.2069	18.6111	18.4725	18.3161	18.7835	20.5344	20.4148	19.7484	19.5364	19.8822	19.8943	NA	18.968	NA	NA	NA	18.7275	NA	17.3025	19.2527	19.1384	18.7569	19.1576	19.3318	19.4745	19.6548	19.7419	19.6739	19.5694	19.0534	18.9366
A4_HUMAN	STNLHDYGMLLPCGIDK	21.87	0.33	1.47	0.14872	2.17	0.14872	22.8188	22.63	22.7584	22.717	21.8238	21.9614	21.7775	21.6596	22.0505	21.5684	21.3606	21.9942	21.222	21.0756	22.3399	22.3	22.5053	22.5389	21.8905	21.7952	21.8094	21.8576	21.32	21.3808	21.5592	21.4588	20.7963	21.1319	22.0108	21.7435	21.3173	21.4095	21.7282	21.8066	22.33	22.364	21.7289	22.1635	22.4947	21.7696
A4_HUMAN	EQNYSDDVLANMISEPR	20.21	0.819	2.81	0.00919	7.92	0.00919	NA	21.1752	20.3713	20.4008	20.531	20.699	NA	20.5045	20.7486	20.5426	19.2147	19.75	NA	NA	NA	20.8663	20.7088	20.8325	NA	20.6869	NA	NA	NA	19.1775	NA	NA	NA	17.9773	20.1959	19.9532	19.8741	NA	20.198	20.2573	19.912	20.1156	NA	19.7586	NA	20.7577
A4_HUMAN	LALENYITALQAVPPRPR	21.11	0.336	1.41	0.16469	2	0.16469	21.9893	22.0246	22.0962	21.9975	21.2731	21.2347	21.4242	21.3281	21.6522	21.707	21.0094	20.9476	20.501	20.2301	21.6469	21.6936	20.3547	20.0352	21.3299	21.1787	21.1167	20.8535	19.888	19.7033	21.2276	20.9915	19.6006	19.4699	21.5067	21.4417	20.8071	20.7018	21.3941	21.0962	22.067	21.8236	21.2802	21.3937	21.3135	21.2575
A4_HUMAN	STNLHDYGMLLPCGIDKFR	18.89	0.07	0.2	0.84617	0.04	0.84617	19.0036	NA	19.9808	19.7707	18.5929	NA	18.58	18.9992	18.9261	19.003	19.6864	NA	19.057	18.405	18.6113	19.3358	17.7854	17.1808	NA	NA	18.6167	NA	17.9411	NA	18.2776	NA	NA	NA	18.9392	19.0962	NA	18.8929	18.882	18.8786	19.7773	19.574	18.7133	19.6547	NA	NA
A4_HUMAN	EGILQYCQEVYPELQITNVVEANQPVTIQNWCK	20.18	-0.033	-0.06	0.95582	0	0.95582	20.5338	20.5685	21.7281	21.7663	19.6072	19.2446	19.8508	20.1837	21.1081	20.9274	20.7796	20.3109	20.3203	19.7876	20.8269	21.3392	18.3889	14.9441	20.6821	20.4289	19.8955	19.1525	19.4157	18.994	19.2409	18.8749	19.9859	20.0875	20.9635	20.9004	19.7954	19.8426	21.0089	20.7775	20.9117	20.6702	20.0939	21.0624	20.8176	21.4962
AA2AR_HUMAN	VLAAHGSDGEQVSLR	18.02	-0.205	-0.73	0.46677	0.54	0.46677	17.0126	17.6098	16.497	17.3116	NA	18.0853	18.5258	18.1148	17.1485	17.2903	18.4364	18.6494	17.9157	18.2699	17.6952	17.5644	18.5965	18.5354	18.5807	18.4666	18.0122	18.0687	18.4533	18.1963	18.2627	18.5793	18.7073	19.337	18.0582	18.024	18.5982	19.1263	17.1328	17.3679	17.3341	17.7314	17.8482	17.5621	18.1455	17.9169
AACT_HUMAN	ADLSGITGAR	20.78	-0.114	-0.36	0.72296	0.13	0.72296	20.2541	20.7261	19.5821	19.5772	21.3549	21.5198	20.4103	19.7544	19.2599	19.4384	20.5882	20.5548	20.2863	20.2291	20.3849	20.359	23.7195	23.629	21.4295	21.4002	21.0894	20.8685	21.4271	21.0623	21.4545	21.5585	20.0259	20.024	20.9976	20.9956	20.2081	20.7448	20.784	20.8448	21.1304	21.1567	20.3918	20.1131	20.9615	20.8952
AACT_HUMAN	EQLSLLDR	21.54	-0.102	-0.37	0.70994	0.14	0.70994	21.5935	21.6747	20.1118	20.2483	22.0957	22.2044	21.1592	21.1351	20.2335	20.2658	21.3428	21.0522	20.8709	21.028	21.3289	21.161	24.0944	24.2059	21.9625	22.0732	21.6973	21.8296	22.1649	22.2111	22.1257	22.2457	21.1573	21.1152	21.5391	21.5641	21.2495	21.2894	21.4921	21.4478	21.7413	21.7526	21.1067	20.8782	21.5646	21.7117
AACT_HUMAN	KLINDYVK	18.79	0.299	0.69	0.4963	0.47	0.4963	18.4605	18.4929	NA	NA	19.1311	18.8773	18.6818	17.7402	NA	NA	18.6071	NA	NA	18.0716	NA	18.1214	21.5106	21.1348	19.5008	19.1549	19.2377	18.8931	19.3308	18.2969	19.6807	19.5832	NA	18.4216	19.1074	19.0313	15.9252	16.5336	18.5844	18.5153	19.3562	19.2017	18.0399	18.1992	19.2276	18.6138
AACT_HUMAN	EIGELYLPK	21.93	-0.114	-0.45	0.65586	0.2	0.65586	21.8884	21.9514	20.7809	21.0074	22.1278	22.2188	21.441	21.5003	20.7031	20.655	21.7198	21.943	21.3358	21.4464	21.4864	21.5348	24.3602	24.5076	22.3951	22.4134	22.036	22.2186	22.1899	22.396	22.4318	22.5566	21.7768	21.471	21.9801	22.0214	21.7427	21.7859	21.7957	21.9311	22.171	22.2439	21.3232	21.3356	22.1319	22.1595
AACT_HUMAN	NLAVSQVVHK	20.32	-0.123	-0.39	0.69736	0.15	0.69736	20.0151	20.0468	19.2314	19.1286	20.8073	20.8007	20.1958	19.7269	18.6158	18.7904	20.1652	20.1062	19.6517	19.8319	19.9978	19.5546	23.2875	23.1398	21.2317	20.9201	20.6259	20.4727	21.0533	20.4472	21.0658	20.8972	19.9493	20.0022	20.4189	20.4825	20.0054	20.0382	20.1153	20.1648	20.8094	20.753	19.5812	19.7006	20.6781	20.4443
AACT_HUMAN	WRDSLEFR	17.33	-0.104	-0.28	0.78296	0.08	0.78296	16.637	16.5367	NA	NA	17.164	16.8711	NA	NA	NA	NA	NA	17.0526	15.6987	NA	NA	NA	19.2212	18.9978	17.8054	17.1646	17.3714	17.2171	17.0244	17.427	17.8068	18.1064	NA	16.4656	17.2085	17.0759	16.8987	16.9938	NA	NA	17.9881	17.8836	NA	NA	NA	17.2298
AACT_HUMAN	ITLLSALVETR	19.6	-0.365	-1.42	0.162	2.03	0.162	19.3714	19.4066	18.4545	18.5791	19.9563	19.8098	18.7328	18.6911	18.139	18.2255	19.5112	19.4008	19.1205	19.0237	19.1446	19.3086	21.7841	21.522	20.1493	19.9727	20.2942	19.8066	20.1255	20.1129	20.3271	20.2417	19.4013	19.4893	19.9616	19.9775	19.0688	19.1907	20.0253	19.8435	20.0954	19.9564	18.7905	18.9268	19.9464	20.0254
AACT_HUMAN	MEEVEAMLLPETLK	18.76	-0.173	-0.45	0.65703	0.2	0.65703	19.0322	19.0309	17.3576	17.4257	18.8958	18.944	17.9629	17.9273	NA	16.2232	18.4735	18.4258	17.7272	17.5424	18.3845	18.5429	22.0014	21.7006	20.1198	19.9998	19.4482	19.243	19.6301	19.4617	19.2742	19.1524	18.0017	18.1584	19.2693	19.3036	17.9071	17.9811	18.7661	18.6098	19.1706	18.8228	17.0484	17.4805	19.536	19.4813
AACT_HUMAN	WEMPFDPQDTHQSR	19.32	-0.262	-0.87	0.38907	0.76	0.38907	19.0502	18.6682	18.367	18.3355	18.9866	18.8202	NA	18.6885	NA	17.4916	19.4067	19.3125	18.3756	18.5477	18.8337	18.8992	22.1556	21.826	20.1532	20.3021	19.6273	19.4818	19.7452	19.7212	19.8382	19.5609	19.1495	19.3445	19.4809	19.3933	18.9038	19.0019	19.5364	19.4129	19.8688	19.7941	18.5021	18.6521	19.4731	19.4702
AACT_HUMAN	MEEVEAMLLPETLKR	20.47	-0.273	-0.94	0.35055	0.89	0.35055	20.536	20.2048	19.6881	19.7751	20.3857	20.1539	19.6912	20.0788	18.7713	18.7694	20.5995	20.3733	19.6913	19.6398	19.9787	20.1374	23.0376	22.7836	21.1045	21.2352	20.9089	20.7979	20.8632	21.0408	21.0868	20.8659	20.4453	20.6029	20.9709	21.0458	19.8494	20.0503	20.507	20.4012	21.0836	20.9901	19.3527	19.7271	20.6197	20.8782
AACT_HUMAN	LYGSEAFATDFQDSAAAK	20.1	0.015	0.05	0.95765	0	0.95765	20.1425	19.9602	NA	NA	20.3457	20.0426	19.8688	19.8128	18.8374	18.5979	20.3328	19.936	19.9247	19.7222	19.6412	19.442	22.2222	22.0565	20.8089	20.1934	20.1174	20.1699	20.6018	20.1324	20.7078	20.5892	NA	NA	19.7857	19.8036	19.8985	19.8789	19.976	19.6859	20.2341	20.3961	19.6772	19.6233	20.4709	19.8645
AACT_HUMAN	AVLDVFEEGTEASAATAVK	20.44	0.094	0.28	0.78426	0.08	0.78426	20.4069	19.9609	NA	NA	20.5632	20.4998	20.1027	19.5906	NA	NA	19.9861	19.9181	19.8537	19.8862	20.4088	19.521	22.82	22.7369	21.0455	20.341	20.4513	20.5265	21.0794	20.3008	20.7221	20.6744	20.3891	20.1272	20.5831	20.6443	19.3135	19.286	20.66	20.3391	20.5605	20.8292	19.8233	NA	20.9032	20.5552
AACT_HUMAN	RLYGSEAFATDFQDSAAAK	19.11	-0.116	-0.36	0.72137	0.13	0.72137	18.7629	NA	17.4408	17.479	19.4243	19.3563	18.9528	NA	NA	NA	18.7964	19.0042	18.2431	NA	18.6404	18.1186	21.4534	21.2853	19.614	19.5384	19.2024	NA	19.6628	20.1553	19.6113	19.7944	19.0704	18.6308	19.0456	18.832	18.5807	18.5703	18.7415	18.5276	19.4445	19.4093	18.4542	NA	19.5785	NA
AACT_HUMAN	FNRPFLMIIVPTDTQNIFFMSK	18.23	-0.679	-1.58	0.12329	2.49	0.12329	17.1798	NA	19.1969	18.8159	16.5497	NA	16.3584	16.6194	16.9616	NA	19.2345	18.9437	18.5019	17.3307	18.2584	18.6595	NA	NA	18.4906	17.8316	18.3647	17.3698	18.5232	18.4512	17.7874	17.0521	19.7551	19.7677	19.6181	19.4322	18.2987	17.9031	17.8348	17.1824	19.0819	18.635	17.7708	18.4795	19.0927	18.7589
AATC_HUMAN	LALGDDSPALK	16.26	-1.029	-2.29	0.03408	5.26	0.03408	NA	NA	16.4777	16.1387	15.0361	15.4874	NA	NA	15.8286	NA	NA	NA	NA	15.2674	NA	NA	NA	NA	NA	15.1522	17.1029	17.5815	NA	NA	15.4328	15.9389	NA	NA	17.2259	16.5646	NA	NA	NA	16.2408	17.7439	17.4522	NA	15.748	NA	NA
AATC_HUMAN	VGGVQSLGGTGALR	16.27	0.498	1.1	0.29081	1.21	0.29081	NA	NA	NA	NA	NA	16.1075	NA	15.9913	NA	NA	NA	NA	NA	NA	NA	NA	16.9479	17.4184	NA	NA	16.4389	16.7205	NA	15.992	NA	NA	NA	NA	15.5398	NA	NA	NA	NA	15.7827	16.4018	16.7791	NA	15.1083	NA	NA
AATC_HUMAN	TDDCHPWVLPVVK	18.26	NA	NA	NA	NA	NA	NA	NA	NA	NA	NA	NA	NA	NA	NA	NA	NA	NA	NA	NA	NA	NA	NA	NA	NA	NA	18.0447	18.2042	NA	NA	NA	NA	NA	NA	NA	NA	NA	NA	NA	NA	18.3068	18.4906	NA	NA	NA	NA
AATC_HUMAN	EPESILQVLSQMEK	16.04	1.051	1.02	0.34616	1.05	0.34616	NA	NA	16.648	17.0405	NA	NA	NA	NA	NA	NA	NA	NA	NA	NA	NA	NA	NA	NA	NA	NA	14.6241	15.0883	NA	NA	NA	NA	NA	16.8055	NA	NA	NA	NA	NA	NA	NA	NA	NA	NA	NA	NA
AATC_HUMAN	NLDYVATSIHEAVTK	17.4	-1.111	-1.48	0.16029	2.18	0.16029	NA	NA	NA	17.2663	NA	NA	15.9515	NA	16.4785	NA	NA	NA	NA	NA	NA	NA	NA	NA	NA	NA	17.7532	17.9884	NA	NA	NA	16.4455	NA	NA	17.5749	17.1709	NA	NA	16.7179	16.8299	18.1301	18.0604	NA	16.3099	20.9157	NA
AATC_HUMAN	IVASTLSNPELFEEWTGNVK	17.58	-1.578	-3.11	0.00772	9.66	0.00772	NA	NA	17.4339	17.6508	NA	NA	NA	NA	NA	NA	15.9192	NA	NA	NA	NA	NA	NA	NA	NA	15.5464	17.9898	18.1364	NA	NA	NA	17.3143	NA	NA	17.7801	18.129	NA	NA	17.9854	17.4683	18.8765	18.3626	NA	NA	NA	NA
AATC_HUMAN	IANDNSLNHEYLPILGLAEFR	17.19	-1.746	-4.64	0.00027	21.53	0.00027	NA	NA	NA	NA	NA	15.2978	NA	NA	16.7825	NA	NA	16.4702	NA	NA	15.9633	NA	NA	NA	NA	15.6122	17.8572	17.9607	NA	NA	NA	NA	NA	NA	17.6304	17.8964	NA	NA	17.0729	16.9943	18.7833	18.4707	17.2443	17.7991	NA	NA
ABCG2_HUMAN	QDKPLIEK	19.85	-0.279	-1.13	0.2633	1.29	0.2633	19.6152	19.8596	19.1028	18.933	19.9119	20.0264	19.7099	19.7093	18.9411	19.0281	20.7799	20.6282	20.0568	19.854	19.6947	19.8858	19.9364	19.5892	19.5594	19.4751	20.6518	20.5424	19.5741	19.6324	19.9893	19.5944	21.4206	21.3596	20.0241	20.0462	21.2667	20.8896	19.7821	19.5986	19.7201	19.3378	19.2932	19.6702	18.612	18.8782
ACBP_HUMAN	WDAWNELK	17.73	0.306	1.35	0.19083	1.81	0.19083	18.2031	NA	18.1251	17.8181	NA	NA	18.0141	NA	17.3687	NA	17.5985	17.2819	17.7934	17.7572	17.7928	18.2632	NA	NA	17.9259	18.1301	17.4339	NA	18.0722	NA	17.4025	NA	NA	16.6911	17.4804	NA	NA	NA	NA	18.0659	17.2458	NA	18.0873	17.7508	17.5855	NA
ACBP_HUMAN	TKPSDEEMLFIYGHYK	17.68	-0.626	-1.37	0.19953	1.89	0.19953	18.1264	17.6512	NA	NA	NA	17.4455	NA	18.0315	NA	NA	NA	NA	NA	NA	NA	NA	NA	16.6816	NA	17.0134	NA	NA	NA	18.0019	NA	NA	18.5937	NA	NA	NA	NA	NA	NA	NA	NA	NA	NA	NA	NA	17.5414
ACBP_HUMAN	QATVGDINTERPGMLDFTGK	19.71	0.184	0.69	0.49287	0.48	0.49287	20.3183	19.4523	19.4329	19.8037	19.9633	19.905	20.5351	20.3941	19.4849	19.4583	19.7001	19.4731	19.3127	19.7291	19.6872	19.7992	19.7893	19.4813	20.0573	20.354	20.1122	20.1607	20.2387	19.7106	20.1291	20.1245	19.0021	20.2561	19.3473	19.1187	19.2132	19.2642	19.4929	19.6686	19.2993	19.458	19.5256	19.5374	19.6872	19.0975
ACTA_HUMAN	AGFAGDDAPR	16.06	-0.301	-0.67	0.5099	0.45	0.5099	NA	NA	15.4382	15.7037	16.8484	NA	NA	16.3182	16.2261	15.5244	15.6903	16.3182	14.7485	NA	NA	NA	NA	NA	NA	15.6074	NA	16.3053	17.7009	17.8062	NA	NA	NA	NA	NA	15.8159	16.7541	16.9832	15.3039	15.2791	14.7682	NA	NA	NA	NA	NA
ACTA_HUMAN	DLTDYLMK	16.43	-0.216	-0.53	0.59855	0.29	0.59855	NA	NA	17.0071	16.582	16.044	15.8582	15.7273	16.0655	16.6101	NA	16.5884	NA	NA	NA	NA	NA	NA	NA	NA	15.8453	16.7766	16.9961	17.9845	17.8407	14.5107	14.9468	NA	NA	16.2722	16.3105	17.7439	17.7969	16.1495	16.3613	15.5483	NA	NA	NA	NA	NA
ACTA_HUMAN	EITALAPSTMK	18.03	0.026	0.07	0.94351	0.01	0.94351	17.3494	17.5098	18.8956	18.9316	NA	16.8369	17.42	17.2567	18.2966	18.2141	17.6998	18.0644	18.4583	18.2822	NA	NA	18.1373	18.4134	17.8403	18.0024	18.1806	18.2773	18.9699	17.361	NA	17.1091	16.0002	NA	18.6513	18.2792	18.715	18.6247	18.3142	18.3863	18.5708	18.3357	18.6034	18.4836	NA	16.6938
ACTA_HUMAN	HQGVMVGMGQK	19.24	0	0	0.99921	0	0.99921	17.9522	18.4208	20.5697	19.8129	19.8831	19.8283	19.7574	19.5871	19.4722	19.2395	19.5503	19.8547	19.1821	19.3301	18.4468	18.2865	18.5068	18.6455	19.2394	19.1787	19.2192	19.3389	19.1736	19.1861	19.0543	19.1272	19.5036	19.4257	19.4373	19.3283	19.2654	19.3565	19.462	19.4908	19.1329	19.842	19.1416	18.6731	18.8435	18.7372
ACTA_HUMAN	SYELPDGQVITIGNER	17.78	-0.29	-0.92	0.36196	0.85	0.36196	16.3884	16.798	18.2864	18.3484	17.9175	17.964	18.3537	18.3333	18.3518	18.2774	18.1538	18.4454	17.3889	17.3885	16.5951	NA	NA	16.5078	17.2086	17.5807	18.4668	18.767	19.2293	19.3278	17.123	17.5397	17.5698	17.6688	17.9067	18.0254	19.3091	19.4472	17.5084	17.3366	17.7432	17.9581	15.6569	15.9739	17.4566	17.4734
ACTA_HUMAN	YPIEHGIITNWDDMEK	18.18	-1.028	-3.4	0.00322	11.54	0.00322	NA	NA	NA	NA	16.9132	NA	NA	17.6975	18.194	18.1336	18.1959	NA	16.8115	NA	NA	NA	NA	NA	NA	17.1094	18.3887	18.3927	19.0751	19.3074	NA	NA	NA	NA	NA	18.2799	19.1786	19.2217	NA	17.8723	18.0841	18.1459	NA	NA	NA	NA
ACTB_HUMAN	VAPEEHPVLLTEAPLNPK	18.57	-0.386	-1.15	0.2563	1.33	0.2563	17.221	17.3289	19.1361	19.2926	19.1842	19.1445	19.2438	19.4182	19.0387	19.0984	19.2008	18.541	17.6736	17.8172	17.0202	17.1632	17.6308	18.0841	18.143	18.1908	19.6613	19.6288	20.4061	20.6604	18.3867	18.5272	17.787	17.7878	19.0076	18.5796	20.2243	20.3271	18.4094	18.4123	18.8528	18.7284	16.646	16.8948	18.0691	18.2914
ACTBM_HUMAN	IWHHTFYNELR	16.79	-0.595	-0.58	0.58875	0.33	0.58875	NA	NA	NA	NA	NA	NA	NA	NA	NA	NA	NA	16.3456	NA	NA	NA	NA	NA	NA	NA	NA	NA	NA	NA	17.7867	NA	NA	NA	NA	15.6186	NA	17.4153	NA	NA	NA	NA	NA	NA	NA	NA	NA
ADA22_HUMAN	TDLMAVTLAQSLAHNIGIISDK	15.5	-0.143	-0.24	0.81035	0.06	0.81035	NA	NA	16.2088	15.2489	NA	NA	NA	NA	NA	NA	16.9688	16.4097	15.3375	NA	NA	14.8688	NA	NA	14.1028	14.6099	15.2182	NA	NA	NA	NA	NA	17.306	17.4249	15.7198	NA	15.9259	15.5996	15.1351	14.6563	14.3448	13.4409	NA	16.0015	NA	NA
ADA22_HUMAN	LFEFSLDDLPSEFQQVNITPSK	16.83	0.48	0.97	0.34143	0.94	0.34143	NA	NA	17.5565	17.7023	NA	NA	16.1592	16.443	17.5701	NA	17.2859	17.2893	17.2117	16.9987	16.6659	17.3888	NA	NA	16.4069	16.5521	15.2912	14.1989	NA	NA	15.4603	NA	16.7997	16.9869	17.5075	17.5647	NA	NA	NA	NA	17.6196	17.489	16.1187	17.4766	16.5579	17.3082
AFAM_HUMAN	FTFEYSR	19.63	0.015	0.06	0.94953	0	0.94953	19.7573	19.7547	18.2433	18.1577	19.9423	19.8579	18.9649	18.998	19.1617	19.1742	20.2941	19.959	19.9004	19.8497	20.153	20.2126	20.2535	20.0773	20.0813	20.0555	20.4399	20.4534	20.5867	20.6413	19.7392	19.5801	20.5312	20.4768	18.8287	18.7503	20.3557	20.2497	19.5331	19.3566	18.9141	18.91	18.4231	18.4179	19.172	19.1861
AFAM_HUMAN	LCFFYNK	18.1	0.222	0.79	0.43474	0.63	0.43474	17.9482	18.1622	NA	NA	18.2343	18.0561	NA	17.1129	NA	NA	18.4733	18.4941	17.8621	NA	18.3903	18.4831	18.6431	18.8531	18.3199	18.4219	18.8502	18.8554	18.7403	19.0599	NA	NA	18.9147	18.2409	16.9065	16.7672	18.5433	18.429	17.871	NA	17.2521	17.238	17.295	NA	17.2552	17.4689
AFAM_HUMAN	GQCIINSNK	17.53	0.337	0.45	0.65644	0.21	0.65644	NA	NA	NA	NA	17.549	17.6104	NA	NA	NA	NA	NA	17.6626	NA	NA	NA	17.2902	18.0096	18.4147	17.5282	17.8406	17.0026	17.3632	18.1615	18.2341	NA	NA	17.5915	15.1868	NA	NA	NA	17.7855	NA	NA	NA	NA	17.2456	NA	NA	NA
AFAM_HUMAN	RPCFESLK	18.58	0.055	0.14	0.88986	0.02	0.88986	18.8042	18.5414	17.2829	15.7911	19.1657	18.8296	18.3628	17.9501	17.6649	17.9279	19.0302	18.5938	18.6546	18.6042	19.5334	19.0325	19.8963	19.4778	19.5882	19.0324	19.6997	19.2773	19.8023	19.1034	18.9099	18.6655	18.9263	18.8308	17.819	17.1083	19.3381	19.0888	18.4685	18.269	17.7851	17.3784	NA	17.6963	18.6415	18.0388
AFAM_HUMAN	LPNNVLQEK	19.85	0.078	0.29	0.77149	0.09	0.77149	19.6146	19.9146	18.5887	18.697	20.4343	20.4903	19.3406	18.5213	19.2195	19.4803	20.0769	20.2083	19.9507	20.1471	20.3467	20.2143	20.7868	20.9176	20.365	20.4097	20.4551	20.3808	20.7795	20.3287	19.8568	20.121	19.9848	20.1137	18.9629	19.1518	19.9069	20.6893	19.5299	19.7768	19.0816	19.1978	19.3745	19.1157	19.6534	19.7003
AFAM_HUMAN	DADPDTFFAK	20.28	0.003	0.01	0.99101	0	0.99101	20.4963	NA	19.1113	19.0662	NA	NA	19.4543	19.7997	19.8288	19.768	20.7812	20.7915	20.3904	20.4759	20.5559	20.7278	21.3902	NA	20.7905	20.8223	21.024	21.1997	21.0742	NA	20.2884	NA	20.9338	21.0328	19.5091	19.46	20.9789	21.0093	20.0145	20.0782	19.4349	19.4561	19.4513	19.6988	NA	NA
AFAM_HUMAN	ICAMEGLPQK	19.81	0.075	0.24	0.81485	0.06	0.81485	19.5588	19.6458	NA	NA	20.006	19.9127	19.1337	18.4705	19.0843	NA	19.9856	19.9441	19.7495	19.7406	20.1338	20.0947	20.612	20.1459	20.3938	20.4678	20.4717	19.887	20.6719	19.7405	19.6532	19.7697	NA	19.693	NA	18.9542	19.7416	20.2672	NA	19.6149	NA	NA	NA	NA	19.6566	18.961
AFAM_HUMAN	TINPAVDHCCK	17.65	0.289	0.92	0.36763	0.84	0.36763	17.0767	NA	NA	NA	17.6089	17.2791	NA	NA	NA	NA	17.6617	18.1821	17.4719	17.7104	17.7716	NA	18.3818	18.4712	18.1977	18.1326	17.8456	18.0454	18.2566	18.0227	NA	NA	18.6283	18.2236	NA	NA	18.0648	17.9933	17.0455	17.0914	16.4098	16.5887	16.1768	16.4637	NA	NA
AFAM_HUMAN	FTDSENVCQER	18.82	0.249	0.74	0.46444	0.55	0.46444	18.3495	18.6457	NA	17.2746	19.3457	19.3478	18.2402	18.3764	18.4105	NA	18.8565	19.4171	18.713	18.9248	19.1463	18.9351	19.8738	20.2101	19.2641	19.5112	NA	19.511	19.7505	19.9483	NA	NA	18.9432	19.6395	NA	17.4715	19.1432	19.4439	NA	18.556	17.5095	NA	17.7033	17.6341	17.9162	18.2436
AFAM_HUMAN	RHPDLSIPELLR	20.14	-0.07	-0.33	0.74066	0.11	0.74066	20.3035	20.1822	19.1116	18.9667	20.2779	20.1418	19.8552	19.8478	19.4973	19.4195	20.8531	20.6126	20.2234	20.1148	20.5319	20.5203	20.3646	20.2816	20.4803	20.4622	20.861	20.8374	20.9112	20.9068	20.2191	20.0777	21.2007	20.8349	19.3441	19.1454	20.8573	20.7267	19.9615	19.7974	19.5863	19.6152	19.6886	19.3974	19.8652	19.6228
AFAM_HUMAN	ESLLNHFLYEVAR	20.79	-0.45	-1.63	0.11093	2.65	0.11093	20.7751	21.0163	20.3374	20.0969	20.8297	20.8344	19.9374	19.8457	19.91	20.0231	21.8966	21.6983	21.2177	20.8238	21.2839	21.0975	19.3754	18.8605	20.9597	20.5752	21.5658	21.4022	21.692	21.5501	20.9739	20.7701	22.2487	22.1135	20.2839	20.0926	21.8751	21.4745	21.1031	20.5604	20.7414	20.3119	20.3163	20.4519	20.4775	20.3818
AFAM_HUMAN	AESPEVCFNEESPK	19.95	0.2	0.69	0.50042	0.47	0.50042	19.5978	19.7123	NA	NA	19.863	NA	NA	NA	NA	NA	NA	NA	NA	NA	NA	19.7295	20.3778	20.7886	20.023	20.0886	NA	20.2068	20.3483	20.5565	19.3087	NA	20.0431	20.203	NA	NA	19.9352	20.1714	NA	19.0853	NA	NA	NA	NA	NA	19.1486
AFAM_HUMAN	IAPQLSTEELVSLGEK	21.1	0.017	0.07	0.94191	0.01	0.94191	21.1124	21.3908	19.8315	19.9992	21.2903	21.2461	20.3948	20.7066	20.5807	20.3358	21.6902	21.3952	21.206	21.1997	21.3097	21.3722	21.8354	21.9383	21.5801	21.6902	21.77	21.9598	21.8284	21.918	21.1068	21.0987	21.733	21.837	20.153	20.0175	21.6513	21.329	20.9819	21.0367	20.4258	20.6079	20.1399	20.1555	21.0212	21.0028
AFAM_HUMAN	SDVGFLPPFPTLDPEEK	20.08	-0.054	-0.26	0.79935	0.07	0.79935	20.3699	20.3317	18.9721	19.1173	20.1269	20.1563	19.243	19.3659	19.5608	19.5816	20.5487	20.7595	20.2569	20.2909	20.2309	20.2705	20.5326	20.4386	20.4315	20.4944	20.8186	20.7514	20.7395	20.8412	19.9542	20.0846	20.9702	21.0761	19.1357	19.131	20.7854	20.6644	19.92	19.9195	19.4595	19.4995	19.1206	19.4774	19.7718	20.0455
AFAM_HUMAN	KSDVGFLPPFPTLDPEEK	19.6	0.008	0.03	0.97717	0	0.97717	19.5016	20.0025	17.9284	18.4821	19.8703	19.9512	18.6073	18.9912	18.8203	19.0874	20.3113	20.4013	19.7921	19.6162	19.8349	19.9982	20.6246	20.4774	19.7543	20.0106	20.2915	20.2516	20.4617	20.4987	19.365	19.1264	20.3764	20.6213	18.7015	18.9793	19.9838	20.2582	19.6364	19.4413	19.1303	19.1051	18.7007	18.5344	19.0462	19.3991
AFAM_HUMAN	HELTDEELQSLFTNFANVVDK	21	-0.404	-1.03	0.30797	1.07	0.30797	21.2513	21.0306	20.5333	20.6681	20.42	20.4879	20.386	20.3161	20.7051	20.7448	21.9324	22.0187	21.2842	21.2316	21.6453	21.5669	19.6966	17.3388	21.4011	21.2293	21.4076	21.3641	21.8129	21.3748	20.5357	20.852	22.1933	22.2815	20.4828	20.615	21.8856	21.7198	21.244	21.0516	20.6655	20.8045	20.6163	20.941	21.0371	21.0917
AFAM_HUMAN	RNPFVFAPTLLTVAVHFEEVAK	18.08	-0.724	-1.43	0.16025	2.05	0.16025	17.6336	17.571	18.2079	17.7428	17.9627	17.227	15.8899	14.913	17.6055	17.5673	19.7226	19.4893	18.561	18.2853	19.356	19.2213	14.5635	NA	18.1335	18.08	19.0853	18.8613	19.7182	18.8606	17.6657	16.4144	20.5443	20.2267	17.8439	17.5785	19.5573	19.1687	17.8717	16.8614	17.859	17.5317	17.8025	18.0915	17.9681	17.7256
AFAM_HUMAN	LKHELTDEELQSLFTNFANVVDK	17.37	-0.389	-0.99	0.32678	0.99	0.32678	17.4418	16.8004	NA	NA	16.1681	16.4327	NA	16.6695	16.8659	16.905	18.2472	17.9042	18.2677	17.5049	17.1184	17.4994	NA	NA	16.9898	16.1793	17.9073	17.4763	18.4348	17.9492	17.9019	18.0072	19.5261	19.3439	NA	16.1126	18.5189	18.1844	17.6097	17.0926	17.4696	17.0984	16.3744	16.1212	16.2471	16.2449
AFAM_HUMAN	TYVPPPFSQDLFTFHADMCQSQNEELQR	17.24	-0.63	-1.1	0.28007	1.2	0.28007	17.1467	17.7473	NA	14.7861	16.5895	16.6197	15.2857	16.0413	NA	15.6596	18.3486	18.4076	17.5077	17.4558	18.0421	18.0349	16.6402	13.8705	18.5119	18.0941	18.6201	18.0534	18.4735	18.1697	16.9624	16.4654	19.301	19.2504	15.7399	NA	18.2798	18.235	17.4653	17.5217	16.2856	16.3347	NA	16.3049	16.7631	17.618
AGRIN_HUMAN	SAGDVDTLAFDGR	18.83	0.079	0.22	0.82919	0.05	0.82919	NA	18.5047	NA	NA	18.7022	18.693	NA	19.0578	NA	NA	NA	NA	NA	NA	NA	NA	NA	19.4336	NA	18.7006	NA	NA	NA	18.5874	NA	18.9291	NA	NA	NA	NA	NA	NA	NA	NA	NA	NA	NA	NA	18.6274	19.1119
AGRIN_HUMAN	TEATQGLVLWSGK	18.05	0.071	0.38	0.70871	0.14	0.70871	17.5233	17.3261	19.0273	19.2543	17.8515	17.5143	18.2942	18.4125	18.3256	18.1791	17.7048	17.8395	17.8526	18.0151	18.076	18.1601	18.2634	18.1156	17.5952	18.0176	17.6564	NA	NA	17.9999	18.15	18.0955	NA	NA	17.9698	17.8315	NA	NA	17.6137	17.865	18.3028	18.312	17.9649	18.0247	18.163	18.2933
AGRIN_HUMAN	TFVEYLNAVTESEK	17.45	0.282	0.79	0.43408	0.63	0.43408	17.3391	16.8561	18.2742	19.1177	17.4445	17.2986	17.3988	17.8092	NA	NA	NA	17.2364	NA	NA	17.2464	17.2613	17.8056	18.1424	16.9144	16.795	17.1652	17.5138	17.1025	17.2051	17.6811	17.703	15.3818	NA	17.7468	NA	NA	NA	17.0955	NA	NA	NA	NA	NA	18.1988	18.0033
ALBU_HUMAN	YLYEIAR	19.08	-0.49	-1.14	0.26319	1.29	0.26319	17.8572	17.3169	17.9072	17.7115	20.4746	20.4254	19.773	19.7438	19.6784	19.4741	18.5416	18.499	18.9358	18.8755	19.3341	19.165	NA	17.2521	18.6494	18.5649	19.359	19.6174	22.5521	22.6462	19.6618	19.7802	NA	NA	18.8714	18.4832	19.1292	18.9426	NA	NA	18.3044	18.1185	18.8139	18.7757	17.5246	NA
ALBU_HUMAN	LCTVATLR	19.4	-0.002	-0.01	0.99597	0	0.99597	17.7019	18.0055	19.5895	18.5663	21.0804	21.1854	20.5282	19.5467	20.0339	20.1941	19.1952	18.8817	19.5555	19.4995	19.8247	19.7382	18.1842	18.1295	19.296	19.2464	19.9627	19.683	20.6545	19.9665	20.3467	20.4755	NA	NA	19.5721	19.4712	18.9721	19.5719	19.3779	18.0553	18.9394	19.118	19.3599	19.3083	18.3478	18.0383
ALBU_HUMAN	DDNPNLPR	16.58	0.641	0.68	0.50783	0.46	0.50783	NA	NA	12.4649	NA	19.5325	19.4748	NA	18.698	18.2987	NA	NA	15.9826	NA	16.9534	17.3249	NA	15.6115	NA	16.3058	14.7269	16.5363	NA	18.2268	NA	17.1201	NA	NA	NA	NA	14.7228	NA	NA	NA	NA	13.9715	NA	15.8995	NA	NA	NA
ALBU_HUMAN	DLGEENFK	16.99	0.322	0.79	0.44485	0.62	0.44485	NA	16.1034	NA	NA	18.1525	18.2767	17.1797	17.0704	17.1975	NA	NA	NA	NA	NA	NA	16.5076	NA	17.0155	NA	NA	16.3034	16.5228	17.5507	NA	NA	17.0363	NA	NA	NA	NA	NA	NA	NA	NA	NA	NA	NA	15.9132	NA	NA
ALBU_HUMAN	FQNALLVR	19.78	0.313	1.01	0.31656	1.03	0.31656	19.2175	19.1632	18.7604	19.0446	21.5086	21.4829	20.8044	20.8339	20.6088	20.647	19.5073	19.4829	20.0286	20.0836	20.2303	20.2151	18.6964	19.0755	19.737	19.6111	20.3653	20.4722	20.8345	20.9387	20.7453	20.8304	17.5998	17.2411	19.8822	19.8227	19.8662	19.906	19.018	18.9515	19.5513	19.1729	19.8664	19.5951	18.925	18.9003
ALBU_HUMAN	QTALVELVK	17.73	-0.163	-0.37	0.71378	0.14	0.71378	NA	15.4895	NA	NA	19.5808	19.6916	18.5136	18.7438	17.9875	17.7349	17.2585	16.9869	16.6366	16.8615	17.8699	17.9929	NA	NA	16.9241	17.3169	18.211	18.4618	18.9278	19.1687	18.8549	18.713	NA	NA	16.9271	16.9785	17.5944	17.4161	NA	NA	NA	NA	17.6365	16.9963	16.0857	16.531
ALBU_HUMAN	LVAASQAALGL	17.38	0.044	0.1	0.92229	0.01	0.92229	NA	NA	NA	NA	19.3643	19.042	18.2068	17.8729	17.5297	17.4906	17.1094	NA	16.9961	16.4229	17.7967	17.6738	15.9331	15.6829	NA	16.516	18.1046	17.5919	18.6809	18.3829	18.5208	18.3113	NA	NA	16.8746	16.5598	17.154	16.7865	NA	NA	NA	NA	16.5168	15.7267	16.3926	NA
ALBU_HUMAN	LDELRDEGK	17.58	-0.019	-0.03	0.97922	0	0.97922	16.9589	16.525	NA	NA	18.8788	18.6793	18.3837	NA	NA	NA	NA	NA	NA	17.6701	NA	NA	15.9652	15.9899	NA	NA	15.5794	NA	19.6749	19.388	NA	NA	NA	NA	NA	NA	NA	NA	NA	NA	NA	NA	17.4621	NA	17.3197	NA
ALBU_HUMAN	KQTALVELVK	17.82	-0.609	-1.15	0.26409	1.32	0.26409	NA	NA	NA	NA	19.3139	19.0771	18.7333	18.7626	17.0402	17.2828	NA	NA	16.3872	NA	16.8864	17.508	NA	NA	16.7306	16.3592	17.9859	18.2315	18.8289	18.7583	18.7514	NA	NA	NA	NA	NA	17.2455	16.8363	NA	NA	NA	NA	NA	NA	NA	NA
ALBU_HUMAN	CCTESLVNR	17.83	-3.398	-4.53	0.0063	20.55	0.0063	NA	NA	NA	NA	NA	NA	NA	NA	16.71	NA	NA	NA	NA	NA	NA	15.5472	NA	NA	NA	NA	NA	NA	19.5649	19.4886	NA	NA	NA	NA	NA	NA	NA	NA	NA	NA	NA	NA	NA	NA	NA	NA
ALBU_HUMAN	LVNEVTEFAK	20.57	0.021	0.08	0.93668	0.01	0.93668	19.7376	19.5832	19.8834	NA	21.9465	21.9902	21.4065	21.4797	21.1473	21.207	20.2613	19.9973	20.6443	20.629	20.8479	20.6802	19.4737	19.38	20.3539	20.2784	21.0143	21.0379	21.4125	21.608	21.2695	21.32	NA	NA	20.5231	20.5819	20.536	20.5271	19.5625	NA	20.2224	20.1632	20.4308	20.4413	19.4346	19.6553
ALBU_HUMAN	AVMDDFAAFVEK	19.61	0.401	0.94	0.35215	0.89	0.35215	18.0113	18.3749	17.789	17.933	21.3842	21.2768	20.8728	20.8421	20.3419	20.4308	19.641	19.559	19.7912	19.5355	20.2709	20.2726	NA	NA	19.5771	19.4953	20.6649	20.5726	21.0491	20.9982	20.9443	20.8055	NA	16.4539	19.9273	19.9924	19.6737	19.6783	17.4961	17.2703	18.6894	18.5287	19.4586	19.58	19.0003	19.2071
ALBU_HUMAN	ETYGEMADCCAK	17	0.196	0.39	0.70011	0.15	0.70011	15.1952	NA	NA	NA	18.9472	19.0086	18.0437	18.175	17.8747	17.5595	15.4268	15.8485	15.6223	16.4393	17.5077	17.2094	NA	NA	16.5351	17.1618	16.9484	17.5207	18.2308	18.4797	17.2604	17.6479	NA	NA	16.0473	16.2856	16.7641	16.5993	NA	NA	NA	NA	NA	15.7886	16.3404	15.421
ALBU_HUMAN	YICENQDSISSK	19.57	-0.444	-0.71	0.48642	0.5	0.48642	NA	17.4333	NA	NA	20.524	20.608	20.2285	20.0738	19.8646	19.7985	NA	18.9436	NA	NA	19.6481	19.1406	NA	17.9439	18.8336	19.125	18.9488	19.4133	22.1834	22.1908	19.4255	19.493	NA	NA	NA	NA	NA	NA	NA	NA	NA	NA	NA	NA	NA	17.5369
ALBU_HUMAN	RHPDYSVVLLLR	19.7	0.032	0.1	0.92187	0.01	0.92187	18.77	18.1873	19.0068	18.7811	20.8201	20.6342	20.9255	20.672	20.3501	20.2151	19.6118	19.2942	19.9905	19.609	20.2508	20.1473	NA	NA	18.8742	18.7662	20.2473	19.9771	20.7983	20.6027	20.4768	20.1909	NA	NA	20.0274	19.727	19.8732	19.6455	18.8599	18.2804	19.6104	19.5489	20.0463	19.7113	18.6691	18.0305
ALBU_HUMAN	KVPQVSTPTLVEVSR	20.04	0.185	0.39	0.69886	0.15	0.69886	19.5034	19.8596	19.3728	19.1449	21.6728	21.6737	21.5363	21.6199	20.5222	20.7042	19.6683	18.8315	19.7206	20.1729	20.4134	20.4343	18.8412	18.893	19.7623	19.9913	20.4408	20.6943	23.3107	23.4189	20.9784	21.0869	17.7345	16.4964	19.6104	19.1561	19.8038	20.1197	18.3242	18.6213	20.0585	19.9353	20.5409	19.9266	19.1272	NA
ALBU_HUMAN	RHPYFYAPELLFFAK	18.71	-0.06	-0.1	0.92478	0.01	0.92478	18.4289	18.4915	NA	NA	19.7876	19.2063	19.7707	19.6157	20.133	20.1183	18.9649	16.9488	NA	NA	19.2797	19.7889	15.6571	NA	17.4596	17.4488	18.9603	18.629	19.7238	19.7526	19.4954	19.4714	18.0931	17.596	19.1159	17.1196	19.1134	17.4734	17.441	NA	NA	18.5478	19.015	NA	19.0764	18.9252
ALBU_HUMAN	RPCFSALEVDETYVPK	19.3	-0.009	-0.02	0.98558	0	0.98558	17.2457	17.1488	17.4598	17.739	21.2522	21.1266	21.0366	21.1488	20.3124	20.2942	19.3735	19.5727	19.287	19.469	19.8748	20.1267	17.123	17.2892	19.5012	19.5353	20.2664	20.4174	20.7845	21.0026	20.6465	20.6799	NA	NA	19.6867	19.452	19.6806	19.7146	16.0554	16.3998	18.3483	18.3748	19.3088	19.6576	18.2873	18.715
ALBU_HUMAN	VFDEFKPLVEEPQNLIK	21.55	0.107	0.38	0.70675	0.14	0.70675	20.8179	21.2978	20.9981	21.0993	22.9152	22.9709	22.3977	22.4176	22.3384	22.4845	21.518	21.4929	21.8286	21.7017	21.9965	21.9568	19.7645	19.7394	21.1476	21.2189	22.0552	22.107	22.509	22.4613	22.4958	22.3105	19.7905	20.051	21.7895	21.8812	21.6373	21.706	20.9542	20.6313	21.5946	21.3916	21.4995	21.5406	20.6339	20.917
ALBU_HUMAN	VHTECCHGDLLECADDR	18.98	1.007	2.2	0.04023	4.85	0.04023	NA	NA	NA	NA	20.1147	20.027	20.1913	19.3932	19.1921	19.2891	NA	NA	NA	NA	18.8126	18.8011	NA	NA	NA	NA	19.0354	18.8323	19.5939	18.6479	19.0996	19.2079	NA	NA	17.7609	17.8746	17.7695	NA	NA	NA	NA	NA	NA	17.9382	NA	NA
ALBU_HUMAN	EFNAETFTFHADICTLSEK	16.65	-1.349	-0.48	0.65032	0.23	0.65032	NA	NA	NA	NA	17.6181	15.3697	17.3026	15.2442	NA	NA	NA	NA	NA	NA	NA	NA	NA	NA	NA	NA	NA	NA	17.7327	NA	NA	NA	NA	NA	NA	NA	NA	NA	NA	NA	NA	NA	NA	NA	NA	NA
ALBU_HUMAN	ALVLIAFAQYLQQCPFEDHVK	18.5	0.533	1.31	0.20002	1.71	0.20002	NA	16.5546	18.523	18.3069	19.5756	19.4121	19.2367	19.234	19.4243	19.3895	18.2836	18.1661	18.4891	18.5256	19.1215	19.282	NA	NA	NA	NA	18.8223	18.9979	19.1482	19.381	19.0861	18.8706	NA	NA	18.8266	18.5471	18.4394	18.5856	NA	15.2981	17.7726	17.8371	17.9831	18.8146	16.8218	17.1466
ALBU_HUMAN	MPCAEDYLSVVLNQLCVLHEK	16.9	-0.09	-0.24	0.81008	0.06	0.81008	NA	NA	16.0777	15.7065	17.2546	16.6545	17.2101	17.7836	17.9616	17.5652	16.9333	17.0657	16.6547	16.3189	17.1759	17.6117	NA	NA	NA	15.62	17.4429	16.965	17.5429	17.6848	17.2627	17.095	NA	NA	17.204	17.3478	16.9044	16.5997	NA	NA	15.3746	15.0031	NA	17.3067	NA	NA
ALBU_HUMAN	LVRPEVDVMCTAFHDNEETFLK	20.23	-0.281	-0.73	0.47216	0.53	0.47216	NA	18.3925	18.9353	18.9832	21.5713	21.4711	21.3611	21.4126	21.0123	21.099	20.2675	20.0393	20.0805	19.9506	20.4865	20.8682	17.4091	NA	20.0424	19.3733	21.0709	20.8159	21.2404	21.1562	21.2843	21.0022	NA	NA	20.524	20.4595	20.2104	20.2988	NA	18.6184	19.922	19.92	20.006	20.1764	19.3012	19.4415
ALBU_HUMAN	RMPCAEDYLSVVLNQLCVLHEK	18.97	0.284	0.59	0.55759	0.35	0.55759	16.1267	15.6704	18.5048	18.5487	19.85	19.3864	20.4795	20.2464	20.2241	19.9769	19.5996	19.6078	19.1139	19.0211	20.0505	20.2634	NA	NA	18.808	18.5882	19.8295	19.7826	20.8432	20.1475	19.7297	19.6308	15.4725	15.7473	19.8997	19.8445	19.3858	19.3991	17.0582	16.839	18.8552	18.8695	19.2706	19.7684	18.3929	17.8521
ALBU_HUMAN	LVRPEVDVMCTAFHDNEETFLKK	17.14	0.343	0.66	0.53654	0.44	0.53654	NA	NA	NA	NA	17.4597	NA	17.153	NA	NA	NA	NA	NA	NA	NA	NA	NA	NA	NA	NA	NA	NA	NA	17.0516	NA	16.8759	NA	NA	NA	NA	NA	NA	NA	NA	NA	NA	NA	NA	NA	NA	NA
ALBU_HUMAN	SHCIAEVENDEMPADLPSLAADFVESK	19.12	-0.134	-0.23	0.81996	0.05	0.81996	17.6712	17.2754	18.7046	18.7689	20.3313	20.3631	20.7386	20.6959	20.5636	20.5229	19.6663	19.6644	19.6737	19.3506	20.1186	20.0956	14.8287	12.9644	19.7517	19.3602	20.234	19.8954	20.8593	20.6026	20.4824	20.3986	16.0266	16.5298	19.8956	19.8485	19.8367	19.5697	17.5957	17.6317	19.2109	18.848	19.505	19.6462	18.5504	18.6241
ALDOA_HUMAN	QLLLTADDR	16.29	-0.19	-0.41	0.69755	0.16	0.69755	NA	NA	NA	15.95	NA	NA	NA	NA	NA	NA	NA	16.0409	NA	NA	NA	16.6065	NA	NA	NA	NA	NA	16.844	NA	NA	NA	NA	NA	NA	NA	16.648	NA	NA	NA	NA	NA	NA	NA	15.6753	NA	NA
ALDOA_HUMAN	KELSDIAHR	14.2	NA	NA	NA	NA	NA	NA	NA	NA	NA	NA	NA	NA	NA	NA	NA	NA	NA	NA	NA	NA	NA	NA	NA	NA	NA	NA	NA	NA	NA	NA	NA	NA	15.6786	NA	NA	NA	NA	NA	NA	NA	12.7152	NA	NA	NA	NA
ALDOA_HUMAN	GILAADESTGSIAK	17.83	0.232	0.27	0.80116	0.07	0.80116	NA	NA	NA	NA	NA	NA	NA	NA	NA	NA	NA	NA	NA	NA	NA	NA	NA	18.5	NA	17.3175	NA	NA	NA	NA	NA	NA	NA	NA	NA	NA	NA	NA	NA	NA	NA	NA	17.677	NA	NA	NA
ALDOA_HUMAN	FSHEEIAMATVTALR	17.12	-0.167	-0.44	0.66509	0.19	0.66509	NA	16.1539	NA	NA	NA	NA	17.5333	17.4186	16.4917	NA	NA	NA	17.1098	16.5502	17.9345	NA	17.2026	16.5464	17.1586	NA	17.1588	17.0801	NA	NA	NA	17.0997	NA	NA	18.2083	17.9148	NA	NA	NA	17.3885	NA	NA	NA	17.403	NA	15.8062
ALDOA_HUMAN	IGEHTPSALAIMENANVLAR	18.62	-0.001	0	0.99802	0	0.99802	18.7709	18.1392	18.4364	18.8695	18.3402	18.316	17.8957	18.1308	19.1497	19.283	18.1835	18.6866	18.9042	18.511	19.2615	19.4392	18.213	18.502	18.7885	18.6542	19.3965	19.4281	18.392	18.2439	18.4333	18.2604	NA	NA	19.7273	19.5263	17.7405	17.5695	19.1646	19.3967	18.2328	18.0855	18.4186	18.9219	18.3434	17.9577
ALDOA_HUMAN	GVVPLAGTNGETTTQGLDGLSER	17.96	0.276	0.74	0.46917	0.55	0.46917	NA	NA	NA	NA	17.8423	17.5739	NA	NA	NA	NA	NA	17.8217	18.7155	NA	17.6358	18.1414	18.2222	18.2856	NA	18.0459	NA	18.07	17.5881	18.0498	NA	NA	NA	NA	NA	NA	NA	NA	NA	17.4833	NA	NA	NA	NA	NA	NA
ALDOC_HUMAN	KELSDIALR	15.63	0.116	0.21	0.84399	0.04	0.84399	NA	NA	NA	NA	NA	NA	NA	NA	NA	NA	NA	NA	NA	NA	NA	16.0586	NA	NA	NA	15.3099	NA	NA	NA	NA	NA	NA	NA	NA	NA	NA	NA	NA	NA	15.5961	NA	NA	15.5412	NA	NA	NA
ALDOC_HUMAN	ALQASALNAWR	16.42	-0.704	-1.06	0.31895	1.13	0.31895	NA	16.319	NA	NA	16.6801	16.3666	NA	NA	NA	NA	NA	NA	NA	NA	NA	NA	NA	NA	15.4625	16.2386	NA	16.4851	NA	17.3808	NA	NA	NA	NA	NA	NA	NA	NA	NA	NA	NA	NA	NA	NA	NA	NA
ALDOC_HUMAN	DNAGAATEEFIK	17.29	-0.613	-1.21	0.27027	1.48	0.27027	16.6767	NA	NA	NA	17.0561	NA	NA	NA	NA	NA	NA	NA	NA	NA	NA	NA	NA	NA	NA	NA	17.1489	NA	NA	NA	NA	NA	NA	NA	NA	NA	NA	NA	17.7645	17.8082	NA	NA	NA	NA	NA	NA
ALDOC_HUMAN	GILAADESVGSMAK	17.31	0.195	0.6	0.55267	0.36	0.55267	17.7225	NA	17.093	NA	17.6059	17.7122	NA	NA	16.5207	NA	17.1943	NA	16.6942	17.3339	18.0894	18.3963	17.4628	17.4947	17.2417	NA	NA	18.279	17.2715	NA	16.3291	NA	NA	NA	NA	NA	16.0832	NA	18.0629	NA	16.9011	16.7181	17.3506	NA	NA	NA
ALDOC_HUMAN	TPSALAILENANVLAR	17.71	-0.435	-1.35	0.18851	1.81	0.18851	17.4617	17.544	NA	18.0824	17.376	17.7657	16.45	NA	17.7345	17.8258	17.4654	NA	17.8427	17.8549	18.3955	18.5802	16.3572	15.8135	17.5737	17.557	17.8334	17.6156	17.3035	17.2945	NA	NA	NA	NA	18.8488	18.9128	16.4998	NA	19.0181	18.8296	NA	17.5812	NA	18.4577	NA	NA
ALDOC_HUMAN	YTPEEIAMATVTALR	16.28	0.17	0.37	0.71199	0.14	0.71199	16.3037	16.3773	16.4746	16.138	15.3432	15.5797	NA	NA	16.2883	16.0782	16.4771	16.317	17.0936	16.6571	NA	17.5712	NA	NA	NA	15.9412	17.2041	16.9371	NA	15.6682	15.1466	15.4626	14.872	13.5627	17.8357	17.2659	NA	NA	17.808	17.4253	15.8977	15.2305	16.3996	16.85	NA	NA
ALS_HUMAN	LAYLQPALFSGLAELR	16	NA	NA	NA	NA	NA	NA	NA	NA	NA	NA	NA	NA	NA	NA	NA	NA	NA	NA	NA	NA	NA	NA	NA	NA	NA	NA	NA	NA	NA	NA	NA	15.6277	16.3651	NA	NA	NA	NA	NA	NA	NA	NA	NA	NA	NA	NA
AMBP_HUMAN	ETLLQDFR	20.97	-0.525	-2.92	0.00566	8.53	0.00566	20.88	20.9546	20.6997	20.625	20.9791	21.0231	21.157	21.2331	19.9021	20.0632	20.8434	20.5609	20.8097	20.8877	20.2642	20.2647	21.0622	21.1612	20.2891	20.4277	20.5692	20.6311	21.2579	21.3857	21.9552	21.9604	22.0063	21.856	21.1555	21.1452	21.4454	21.4669	20.1752	20.2643	20.5082	20.6145	21.3646	21.2367	21.7445	21.8472
AMBP_HUMAN	TVAACNLPIVR	21.8	-0.251	-1.6	0.11812	2.55	0.11812	21.4608	21.5249	21.1544	21.2467	22.0366	22.0756	21.6732	21.7487	21.423	21.4215	21.7254	21.6232	21.7807	21.9357	21.5836	21.5749	21.8993	22.1231	21.6803	21.784	22.0695	22.219	22.1972	22.3749	22.5095	22.5494	22.7023	22.6746	21.3411	21.4468	22.1983	22.2185	21.1465	21.2726	21.3953	21.4155	21.7807	21.5079	21.6912	21.7841
AMBP_HUMAN	GVCEETSGAYEK	17.52	0.385	0.56	0.58344	0.32	0.58344	19.01	18.4677	NA	NA	16.9448	16.6134	NA	NA	NA	NA	NA	NA	NA	NA	NA	NA	NA	17.163	NA	NA	NA	NA	NA	17.1369	NA	NA	17.2118	17.4308	NA	NA	NA	NA	NA	NA	NA	NA	15.5523	NA	18.6566	18.5594
AMBP_HUMAN	AFIQLWAFDAVK	20.21	-0.879	-2.43	0.01979	5.88	0.01979	19.985	19.6016	20.1395	19.7636	19.9327	19.3142	19.8761	19.9911	20.1184	20.0796	20.7791	20.5914	20.9212	20.6301	20.5484	20.5655	17.4179	15.9386	19.5615	19.6154	20.7499	20.4231	20.682	20.7443	21.3197	21.011	21.7329	21.6724	20.4025	20.1809	21.0782	20.9427	20.1295	19.9977	20.3413	19.8686	20.2557	20.3718	20.4708	20.5669
AMBP_HUMAN	CVLFPYGGCQGNGNK	18.3	-0.385	-1.84	0.07271	3.4	0.07271	17.7536	17.8825	17.5222	17.253	18.1121	17.8531	18.0719	NA	17.8805	17.8275	18.2538	18.67	18.2848	18.4834	18.3562	18.1753	18.1929	18.1857	18.4535	18.7402	18.5466	18.753	18.7308	18.975	19.0846	19.14	19.8615	19.4158	18.1512	18.0216	18.8761	18.8489	17.5564	17.8111	17.8257	17.7756	18.1285	18.0914	18.0787	18.0537
AMBP_HUMAN	EYCGVPGDGDEELLR	20.2	-0.225	-1.2	0.23738	1.44	0.23738	19.8672	20.0615	19.3286	19.473	20.4047	20.4104	19.9918	20.1537	19.9102	19.9345	20.1448	20.1648	20.1932	20.3777	20.0518	20.0491	20.2946	20.4874	20.1957	20.348	20.371	20.6776	20.7216	20.8805	20.9921	21.1412	21.0691	21.1942	19.527	19.7062	20.8597	20.8408	19.4534	19.5844	19.4493	19.633	19.8036	19.7759	20.2197	20.4483
AMBP_HUMAN	GECVPGEQEPEPILIPR	20.92	-0.386	-1.72	0.09329	2.95	0.09329	20.952	20.9767	20.7921	20.9309	20.7997	20.933	21.2837	21.4615	19.983	20.0485	20.6371	20.5353	20.41	21.0371	20.0522	20.3193	21.0574	21.1633	20.4561	20.719	20.4695	20.706	21.2168	21.4604	21.8728	21.8961	21.9151	21.6612	20.6942	20.7749	21.1129	21.3866	19.7286	20.1955	20.496	20.4766	21.0334	21.2187	21.8877	22.0637
AMBP_HUMAN	VVAQGVGIPEDSIFTMADR	20.6	-0.582	-2.7	0.01015	7.27	0.01015	19.9879	20.494	20.5153	20.7218	20.0258	20.1541	20.6326	20.7608	19.3956	20.2098	20.7411	20.615	20.6136	20.361	19.9946	20.2921	20.2775	20.0476	20.1518	20.1524	20.5037	20.3447	20.5233	20.5307	21.5141	21.2749	21.798	21.9309	20.9035	20.9619	20.9566	21.0842	20.1904	20.1926	20.7271	20.1916	20.7469	20.8272	21.2112	21.3721
AMBP_HUMAN	KEDSCQLGYSAGPCMGMTSR	19.68	-0.283	-1.34	0.18898	1.78	0.18898	19.5845	19.198	19.0722	19.4508	19.4345	19.3984	19.911	19.8915	19.3579	18.9909	19.6639	19.7417	19.3279	19.3595	19.4861	19.5217	19.7793	19.5613	19.9431	20.1785	20.0119	20.0529	20.4799	20.6214	20.3409	20.55	20.93	21.1406	19.0843	19.1444	19.912	19.96	18.9628	18.8402	19.0869	19.0256	19.4169	19.038	19.9374	19.9855
AMD_HUMAN	EGPVLILGR	19.4	0.053	0.26	0.79381	0.07	0.79381	19.3984	19.2696	20.0395	19.8442	19.4691	19.3219	19.1448	19.1713	19.3452	19.2369	19.444	18.8859	19.4151	19.367	19.3961	19.2965	19.8373	19.831	19.4742	19.246	19.5795	19.3813	19.062	19.0593	19.2836	19.2595	18.4898	17.8224	19.8599	19.68	18.9997	18.8152	20.0057	19.82	20.1282	20.0346	19.9166	19.7285	19.2828	19.1711
AMD_HUMAN	IVQFSPSGK	18.71	0.148	0.67	0.50698	0.45	0.50698	17.9614	18.2739	19.3799	19.449	18.9434	18.866	18.7042	18.334	18.8522	19.02	18.6735	18.4999	18.8202	18.8051	18.784	18.8038	19.1279	19.1353	18.6082	18.7175	18.7171	18.6514	18.282	17.7667	18.5658	18.7001	17.2831	17.488	19.1677	19.1393	17.798	18.3265	19.3638	19.2901	19.53	19.44	19.4493	19.1694	18.4877	18.1769
AMD_HUMAN	AGIEVQEIK	17.77	0.259	0.98	0.33397	0.96	0.33397	16.8854	17.4186	18.2633	18.1616	18.1018	18.1433	17.8282	17.1998	18.1933	18.2704	17.4307	17.6586	17.9464	17.9852	18.2317	17.8596	18.2554	18.2303	17.597	17.8433	17.5969	17.5863	17.2307	16.5959	17.5167	17.6369	16.8168	NA	18.1443	18.1983	16.6752	17.2186	18.2799	18.1974	18.3631	18.4802	18.8324	18.0667	17.1666	16.7848
AMD_HUMAN	NNLVIFHR	18.08	0.041	0.17	0.86781	0.03	0.86781	NA	17.6768	18.7154	18.2074	NA	17.8599	NA	NA	17.7482	17.6951	NA	NA	18.0147	NA	18.017	NA	18.3686	18.4841	17.9541	NA	NA	NA	NA	17.2212	NA	17.4081	NA	NA	18.5673	18.313	17.4992	NA	18.4297	18.4089	18.5619	18.6711	NA	18.3165	18.0422	17.5901
AMD_HUMAN	NGQWTLIGR	16.77	-0.013	-0.04	0.97053	0	0.97053	NA	NA	NA	NA	16.6005	16.1663	16.8218	16.8861	17.3983	17.1333	NA	16.6362	16.7562	16.2592	16.8494	17.0679	NA	NA	NA	16.2276	16.7916	17.0302	16.1484	NA	NA	NA	NA	15.3379	17.5399	17.4359	NA	NA	NA	17.5841	NA	NA	NA	NA	NA	NA
AMD_HUMAN	ANILYAWAR	16.92	-0.447	-1.17	0.26274	1.37	0.26274	NA	NA	NA	17.1348	16.9444	NA	NA	NA	16.7181	16.3923	NA	NA	NA	NA	NA	NA	16.4317	16.3596	NA	NA	17.0413	16.4595	NA	NA	NA	NA	NA	NA	17.1157	NA	NA	NA	17.6416	17.2861	NA	17.4598	NA	NA	NA	NA
AMD_HUMAN	GSGGLNLGNFFASR	16.91	0.287	0.95	0.34875	0.9	0.34875	15.7375	16.3786	17.387	17.7322	16.9578	NA	16.1892	17.171	16.9581	17.2761	16.8844	17.1855	17.4221	17.1892	17.1029	17.4936	16.9394	17.0453	16.757	17.1671	15.7761	16.2759	NA	NA	NA	16.687	15.8196	NA	17.5203	17.5833	15.8833	16.1033	17.2437	17.544	17.5986	17.7569	17.0392	17.1628	16.015	NA
AMD_HUMAN	IPVDEEAFVIDFKPR	19.56	-0.113	-0.46	0.65178	0.21	0.65178	NA	NA	20.4977	20.2745	19.3106	NA	19.5169	19.4227	19.6865	NA	19.6361	19.5308	NA	19.0886	NA	19.4314	18.47	NA	19.3779	NA	19.6388	19.4613	NA	NA	NA	NA	18.5703	18.8051	20.1806	20.1218	NA	18.9114	19.969	20.0061	20.2646	20.1786	19.1424	19.3831	NA	NA
AMD_HUMAN	DGNYWVTDVALHQVFK	17.04	0.263	0.35	0.73366	0.12	0.73366	NA	NA	NA	17.2007	NA	NA	NA	NA	16.9351	NA	NA	NA	NA	NA	NA	NA	NA	NA	NA	NA	14.986	NA	NA	NA	NA	NA	NA	NA	NA	NA	NA	NA	18.1947	17.5921	17.2023	16.9464	17.0456	17.2198	NA	NA
AMD_HUMAN	EEEEVLDQGDFYSLLSK	16.34	0.382	0.88	0.41033	0.77	0.41033	NA	NA	NA	17.0903	NA	NA	NA	NA	16.0854	NA	NA	NA	NA	NA	NA	NA	16.4209	NA	NA	NA	NA	NA	NA	NA	NA	NA	NA	NA	NA	15.8854	NA	NA	NA	NA	NA	16.5048	16.0601	NA	NA	NA
AMD_HUMAN	REEEEVLDQGDFYSLLSK	18.76	0.101	0.53	0.59964	0.28	0.59964	18.6863	NA	19.3504	19.749	19.0103	19.0698	18.6679	18.9873	18.9139	19.0786	18.7292	18.8789	18.5807	18.5444	18.6286	18.6957	18.3806	18.3385	18.1842	18.2909	18.6995	18.9393	NA	NA	18.3561	18.4921	NA	18.2491	19.4068	19.3047	18.142	18.1592	19.1825	19.2079	19.464	19.3477	18.3758	18.4409	NA	17.9565
AMD_HUMAN	QSPQLPQAFYPVGHPVDVSFGDLLAAR	16.87	-0.269	-0.65	0.51866	0.43	0.51866	16.1612	15.5301	19.1116	18.5889	15.2708	15.2986	16.4152	16.6183	17.4215	17.1832	17.1561	17.0153	16.9265	16.6222	16.8352	16.3891	NA	NA	NA	15.9567	16.1715	16.5358	NA	NA	15.5451	15.4913	16.3631	NA	18.2505	17.8781	16.5255	NA	17.8117	17.3402	18.5874	18.2239	16.5534	17.1575	NA	NA
AMD_HUMAN	FITQWGEESSGSSPLPGQFTVPHSLALVPLLGQLCVADR	15.91	-0.567	-0.53	0.60613	0.28	0.60613	NA	NA	17.9865	17.1754	NA	NA	NA	NA	NA	NA	NA	NA	NA	NA	14.4992	15.8399	NA	NA	NA	13.4486	NA	NA	NA	NA	NA	NA	NA	NA	16.6474	16.2277	NA	NA	NA	NA	16.1774	14.9626	NA	16.3191	NA	15.7417
ANGI_HUMAN	NVVVACENGLPVHLDQSIFR	19.07	NA	NA	NA	NA	NA	NA	NA	NA	NA	NA	NA	NA	NA	NA	NA	NA	NA	NA	NA	NA	NA	NA	NA	NA	NA	NA	NA	NA	NA	NA	NA	NA	19.0721	NA	NA	NA	NA	NA	NA	NA	NA	NA	NA	NA	NA
ANGT_HUMAN	LDTEDKLR	20.15	0.072	0.4	0.69058	0.16	0.69058	19.9372	20.1864	NA	NA	20.5214	20.378	20.4478	20.5058	NA	NA	19.5975	NA	19.7693	NA	NA	NA	20.2446	20.1791	20.4558	20.5058	NA	NA	20.0468	20.23	19.7743	20.0629	NA	NA	20.2571	20.2916	19.7236	19.9176	19.9522	NA	20.3271	20.4446	20.4035	NA	19.8033	19.8457
ANGT_HUMAN	FMQAVTGWK	22.81	-0.035	-0.24	0.80965	0.06	0.80965	23.0612	22.7747	23.4653	23.3214	22.578	22.3743	22.793	22.8516	22.6832	22.5258	22.8759	22.6954	22.5526	22.4061	22.7398	22.8521	22.6503	22.3349	23.2593	23.0774	22.7132	22.6358	22.6805	22.661	22.8557	22.693	22.7999	22.5802	23.1824	23.1392	22.5737	22.313	23.1024	22.9799	23.1236	23.045	23.0234	23.0402	22.8141	22.6204
ANGT_HUMAN	LQAILGVPWK	17.52	0.459	1.41	0.17658	1.98	0.17658	18.6675	NA	18.0395	17.8687	NA	17.327	17.6917	NA	16.9939	17.174	17.1335	17.1718	NA	NA	NA	18.0854	NA	NA	NA	NA	NA	NA	NA	NA	NA	NA	NA	NA	18.1752	17.9593	NA	16.1244	17.5177	17.459	NA	17.3483	17.0849	NA	NA	NA
ANGT_HUMAN	ALQDQLVLVAAK	23.73	0.14	1.29	0.20349	1.67	0.20349	24.0149	24.0315	24.1086	24.0475	23.9276	24.0518	23.8123	23.8327	23.7386	23.718	23.4759	23.4273	23.3648	23.5028	23.5906	23.5509	23.7633	23.9185	24.005	24.0219	23.5174	23.6522	23.5175	23.6091	23.6588	23.6399	23.522	23.4737	23.8422	23.8313	23.2551	23.3127	23.7176	23.8011	23.8363	23.8489	23.7537	23.6112	23.8389	23.8722
ANGT_HUMAN	DPTFIPAPIQAK	24.05	0.153	1.31	0.19861	1.71	0.19861	24.3556	24.4991	24.1427	23.9837	24.5115	24.5053	24.0605	24.1671	23.9236	23.8799	23.8883	23.8272	23.6502	23.6336	23.9487	23.939	24.3388	24.4553	24.4088	24.4666	23.8943	24.0052	23.7922	23.9761	24.0271	24.0789	23.5965	23.4865	24.0992	24.0961	23.8031	23.7418	24.0375	24.0811	24.1841	24.1737	24.0489	23.9974	24.2056	24.2048
ANGT_HUMAN	SLDFTELDVAAEK	24.38	0.144	1.27	0.21112	1.61	0.21112	24.6174	24.7457	24.4644	24.5605	24.5746	24.5876	24.4352	24.5626	24.3816	24.2592	24.3228	24.2656	24.0657	24.1271	24.3212	24.2543	24.4103	24.5261	24.7018	24.7871	24.1402	24.2857	24.1332	24.2819	24.2837	24.3933	24.0345	24.0794	24.55	24.485	24.1282	23.8891	24.5	24.6025	24.5498	24.5051	24.207	24.2534	24.4655	24.3331
ANGT_HUMAN	AAMVGMLANFLGFR	16.39	0.11	0.19	0.85046	0.04	0.85046	16.2028	NA	17.8165	17.0931	NA	NA	NA	NA	15.7299	NA	NA	15.2685	15.5506	NA	16.7268	17.3473	NA	NA	NA	NA	NA	NA	NA	NA	NA	NA	NA	NA	17.2052	16.6975	NA	NA	15.0744	NA	15.9504	NA	16.1523	16.7098	NA	NA
ANGT_HUMAN	VLSALQAVQGLLVAQGR	23.51	-0.09	-0.55	0.58859	0.3	0.58859	23.7208	23.7886	24.3302	24.2484	23.5345	23.5682	23.3944	23.4231	23.561	23.5383	23.6247	23.6013	23.4128	23.3152	23.5516	23.5835	22.0897	22.1152	23.572	23.4171	23.3539	23.2014	23.3311	23.4341	23.4397	23.4278	23.7011	23.6032	24.0691	23.8753	23.1224	23.1776	23.8584	23.7774	24.0023	23.6751	23.6104	23.8166	23.2584	23.4508
ANGT_HUMAN	VEGLTFQQNSLNWMK	22.18	0.041	0.16	0.87332	0.03	0.87332	22.7558	22.6808	20.8843	22.3216	22.2606	22.0673	22.3458	22.5756	22.0294	22.2078	22.1051	22.0776	21.7914	21.7904	22.2795	22.5356	22.0245	21.7527	22.7995	22.7413	22.1577	22.0978	21.9493	22.0294	22.3005	22.0358	21.7281	22.2018	22.289	22.4356	22.0542	21.8699	22.2627	22.5196	22.0537	22.1603	21.6248	22.2678	22.7211	22.4551
ANGT_HUMAN	SLDFTELDVAAEKIDR	17.54	-0.094	-0.3	0.76829	0.09	0.76829	18.6483	18.4592	15.3789	15.9243	18.7985	19.0587	18.2589	18.6463	17.2928	17.6468	NA	16.4234	16.5989	16.9474	17.2427	17.7798	NA	17.3179	17.5304	17.4743	17.5541	17.9077	17.5823	17.5281	18.2025	18.2579	NA	NA	17.265	17.7787	17.4923	17.0534	17.3759	17.5577	18.0121	17.5788	16.826	17.1054	17.6347	17.3978
ANGT_HUMAN	QPFVQGLALYTPVVLPR	23.23	-0.095	-0.63	0.53463	0.39	0.53463	23.3206	23.3404	23.8045	23.8573	23.0304	23.0832	23.1943	23.2724	23.3047	23.3497	23.3358	23.3253	23.1024	22.9384	23.113	23.1605	22.4302	22.0516	23.4187	23.2841	22.8193	22.6826	23.1168	23.0308	23.0159	23.193	23.2214	23.3232	23.4072	23.3931	23.1074	22.9603	23.6875	23.6302	23.7746	23.5215	23.4327	23.571	23.2673	23.4542
ANGT_HUMAN	ANAGKPKDPTFIPAPIQAK	21.17	0.22	1.49	0.14511	2.21	0.14511	21.8144	21.5735	20.9559	21.039	21.703	21.6182	22.0425	22.17	21.0892	20.9854	20.6774	20.7392	20.4679	20.5171	20.8998	21.0185	21.5462	21.5523	21.6114	21.6179	20.9185	21.1037	21.172	21.1726	21.1888	21.2964	21.0324	20.9029	20.9439	20.9142	20.9911	20.9028	20.8901	20.9403	21.499	21.4653	20.9738	20.8842	21.0281	21.0268
ANGT_HUMAN	VGEVLNSIFFELEADER	15.44	2.031	0.71	0.50745	0.51	0.50745	NA	NA	NA	NA	NA	NA	NA	NA	NA	NA	NA	NA	NA	NA	NA	NA	NA	NA	16.9014	NA	NA	NA	NA	NA	NA	NA	14.5913	NA	NA	NA	NA	NA	NA	NA	NA	NA	NA	NA	16.5107	13.7479
ANGT_HUMAN	LDAHKVLSALQAVQGLLVAQGR	18.58	0.197	0.72	0.47293	0.53	0.47293	18.8278	18.6987	18.796	18.8021	17.9235	18.0178	18.0091	18.0758	17.7655	17.5204	18.7523	18.8033	19.1764	18.8673	19.6245	19.1974	NA	NA	19.7932	19.6437	17.925	17.9256	18.1794	17.8533	17.7679	18.2483	17.6856	17.4232	18.6283	18.7363	18.4154	18.3869	19.3508	18.8228	19.1691	19.1214	18.318	19.1136	19.3937	19.2629
ANGT_HUMAN	ADSQAQLLLSTVVGVFTAPGLHLK	16.1	NA	NA	NA	NA	NA	NA	NA	16.2054	15.9962	NA	NA	NA	NA	NA	NA	NA	NA	NA	NA	NA	NA	NA	NA	NA	NA	NA	NA	NA	NA	NA	NA	NA	NA	NA	NA	NA	NA	NA	NA	NA	NA	NA	NA	NA	NA
ANGT_HUMAN	VYIHPFHLVIHNESTCEQLAK	17.56	-0.324	-0.56	0.59756	0.31	0.59756	NA	NA	NA	NA	NA	NA	NA	NA	NA	NA	NA	NA	NA	16.7206	NA	NA	NA	NA	17.8507	17.9277	NA	NA	NA	17.836	NA	NA	NA	NA	NA	NA	NA	NA	NA	NA	NA	NA	NA	NA	NA	17.4672
ANGT_HUMAN	TGCSLMGASVDSTLAFNTYVHFQGK	17.37	-0.524	-1.09	0.28764	1.18	0.28764	17.3679	16.5945	17.9918	NA	18.4706	17.7702	16.7538	16.4791	16.286	NA	NA	NA	18.0519	17.3189	16.6569	16.9864	NA	NA	17.4692	15.9618	NA	NA	NA	NA	NA	NA	17.532	17.2401	NA	NA	17.628	17.8383	18.1546	NA	17.9414	18.5132	17.1954	NA	17.3028	17.4253
ANGT_HUMAN	EPTESTQQLNKPEVLEVTLNRPFLFAVYDQSATALHFLGR	16.17	0.372	0.54	0.59389	0.29	0.59389	15.6519	NA	18.4788	16.8524	NA	NA	NA	NA	16.5241	16.3985	16.0132	16.1347	15.1004	NA	16.2222	16.8533	NA	NA	NA	NA	NA	NA	NA	15.0892	NA	NA	16.0065	15.5229	17.4229	16.7875	16.2361	14.7991	NA	NA	16.3043	15.5058	15.1487	16.6679	15.9415	NA
ANT3_HUMAN	ELFYK	19.87	-0.195	-0.75	0.45965	0.56	0.45965	19.676	19.5992	19.4145	19.433	20.0752	19.9763	20.0009	19.37	18.7672	19.2678	20.2942	19.7509	20.3372	20.0148	19.817	20.0225	19.944	19.373	20.3628	19.9851	20.4509	19.8923	20.1368	19.3982	20.9574	20.976	20.636	20.4381	19.355	19.2947	20.1274	20.4025	19.2767	19.1112	19.3422	19.37	19.9483	19.9983	20.357	19.9107
ANT3_HUMAN	IEDGFSLK	20.83	0.117	0.46	0.64788	0.21	0.64788	21.1497	21.0931	19.5424	19.2534	21.6278	21.649	20.5252	21.0778	20.458	20.3404	20.7604	20.6233	20.6406	20.7729	20.959	21.1277	21.6619	21.7244	21.3495	21.4207	21.2639	21.4547	21.3108	21.4812	21.6001	21.7586	21.1683	21.0091	19.7212	19.8919	21.1998	21.0697	20.4338	20.0152	19.8396	19.7363	19.7291	20.0359	21.3985	21.2975
ANT3_HUMAN	LPGIVAEGR	20.24	-0.147	-0.86	0.39216	0.75	0.39216	20.1564	20.2628	19.7726	19.634	20.1567	20.1626	20.3595	19.9358	20.0753	20.2493	20.2013	20.2233	20.285	20.1772	20.2127	20.2083	20.3555	20.2555	20.4112	20.3192	20.1274	19.8026	20.6539	20.1712	20.393	20.3836	19.5436	19.8263	20.3481	20.3172	20.8803	21.2427	20.1016	20.1032	20.1428	20.0617	20.4433	20.3434	20.9357	20.5366
ANT3_HUMAN	SKLPGIVAEGR	20.51	-0.007	-0.03	0.9747	0	0.9747	20.381	20.6635	19.5835	19.6109	20.815	20.7183	20.7246	20.2115	19.698	20.0432	20.3753	20.4169	20.6629	20.6823	20.3937	20.6645	21.116	21.0861	21.2291	21.0016	21.0163	20.9311	20.8049	20.2418	21.4742	21.6096	21.1268	20.6921	19.7651	19.7626	20.6504	20.8278	19.5404	19.7256	19.7011	19.7078	20.1923	20.5001	21.0646	20.8916
ANT3_HUMAN	FRIEDGFSLK	18.6	0.247	0.49	0.62874	0.24	0.62874	18.8809	18.6835	NA	NA	19.0723	19.1599	18.8902	18.8821	18.2004	18.1416	NA	NA	18.4116	19.158	18.4565	18.741	18.5528	18.3659	19.2932	18.8405	19.2035	19.1061	18.8237	19.0336	19.8171	19.6456	15.0831	13.7097	NA	NA	19.6457	19.174	18.3115	18.0197	NA	NA	NA	18.9036	19.2999	19.1634
ANT3_HUMAN	DDLYVSDAFHK	21.58	-0.055	-0.27	0.79202	0.07	0.79202	21.7505	21.531	20.8293	20.5522	21.6853	21.5745	21.7987	21.6439	20.9971	21.036	21.6527	21.5035	21.7348	21.4875	21.5734	21.6313	22.0231	21.7832	22.3133	21.9209	22.0218	21.9502	21.8562	21.6937	22.468	22.217	22.5236	22.2353	20.8877	20.8306	22.0278	21.7375	20.9014	20.786	20.7543	20.7196	21.2045	21.5144	21.9196	21.8695
ANT3_HUMAN	TSDQIHFFFAK	21.24	-0.135	-0.71	0.47885	0.51	0.47885	21.4807	21.4558	20.9587	20.6375	21.2573	21.0089	21.3869	21.4885	20.765	20.7128	21.3907	21.0833	21.4591	21.3805	21.1579	21.2395	20.8848	20.7683	21.6322	21.2618	21.6296	21.701	21.4221	21.346	22.0497	22.097	22.198	22.0749	20.5075	20.6677	21.6684	21.388	20.531	20.5835	20.512	20.4814	21.0024	20.942	21.7843	21.531
ANT3_HUMAN	EVPLNTIIFMGR	22.52	-0.107	-0.41	0.68044	0.17	0.68044	22.3201	22.3927	21.8185	21.9017	22.7726	22.7098	22.3332	22.3484	21.9275	22.0122	22.6937	22.5583	22.6432	22.5539	22.5794	22.674	22.4334	22.101	22.5972	23.9285	22.8241	22.6176	22.8022	22.785	23.2465	23.0715	23.2546	23.2831	21.9969	21.9932	22.6577	22.6796	22.0471	21.9162	21.9324	21.7848	22.2184	22.3962	23.3659	22.5572
ANT3_HUMAN	DIPMNPMCIYR	23.13	-0.091	-0.5	0.62258	0.25	0.62258	23.2036	23.0436	22.6756	22.6671	23.2699	22.9589	22.9705	23.1087	22.55	22.4193	23.2787	23.1403	23.3168	23.1104	23.2451	23.3509	23.2419	22.8891	23.6105	23.5835	23.5498	23.4882	23.5505	23.6553	23.9931	23.7593	23.8871	23.9639	22.4781	22.466	23.5008	23.3486	22.5982	22.5429	22.361	22.247	22.6428	22.8172	23.3616	23.2444
ANT3_HUMAN	VAEGTQVLELPFK	22.35	0.085	0.44	0.66194	0.19	0.66194	22.5129	22.5437	21.4326	21.6594	22.7717	22.7514	22.2934	22.6115	21.9552	21.964	22.4154	22.3751	22.2879	22.5171	22.3648	22.4222	22.816	22.8627	22.5102	22.8244	22.5676	22.7169	22.5044	22.8001	22.9389	23.0406	22.8067	23.0322	21.3826	21.6241	22.4523	22.7204	21.7412	21.8583	21.4448	21.4526	21.8706	21.92	22.5648	22.7489
ANT3_HUMAN	FATTFYQHLADSK	22.25	0.014	0.08	0.93792	0.01	0.93792	22.194	22.1843	21.6457	21.5621	22.5512	22.5394	22.4021	22.5542	21.8209	21.8086	22.3616	22.0699	22.2501	22.2084	22.083	22.2128	22.6909	22.6486	22.7642	22.6604	22.6	22.5797	22.5092	22.6076	22.9363	22.9315	23.1565	22.8648	21.5656	21.5458	22.5294	22.4157	21.5939	21.5589	21.5888	21.5322	22.0975	22.1457	21.8351	22.3353
ANT3_HUMAN	RVAEGTQVLELPFK	19.77	0.009	0.04	0.96769	0	0.96769	19.4158	19.5303	18.8129	18.6902	20.0097	19.8966	19.837	20.1987	19.4505	19.2468	20.0988	19.7203	19.7627	19.9691	19.9106	20.0348	20.0866	20.2133	20.3264	20.2374	20.0389	20.1267	19.9094	20.2638	20.383	20.5525	20.6913	20.6437	18.8413	18.7501	20.392	20.2625	19.0791	18.931	18.6375	18.6477	19.7591	19.699	19.9247	19.7368
ANT3_HUMAN	GDDITMVLILPKPEK	22.08	-0.117	-0.65	0.5208	0.42	0.5208	22.2444	21.9546	21.5619	21.484	22.2477	22.0998	22.462	22.291	21.5852	21.7176	22.2956	22.2067	22.1397	22.03	22.3275	22.3239	21.4365	21.2749	22.5506	22.2122	22.472	22.4633	22.487	22.2505	22.6377	22.6221	22.9659	23.0418	21.5443	21.5662	22.3327	22.2887	21.5666	21.5239	21.2505	21.1369	21.8473	21.7977	22.4821	22.5078
ANT3_HUMAN	LQPLDFKENAEQSR	20.14	0.009	0.03	0.97258	0	0.97258	20.2657	20.2474	18.2781	18.724	20.5939	20.7174	20.6726	20.7594	19.7307	19.4139	20.3798	20.25	20.0981	20.4392	20.0604	20.0695	20.7409	20.7835	20.3113	20.4201	19.4858	20.4494	20.6654	20.7944	21.0354	21.285	21.1309	21.1497	19.2709	19.2104	20.4724	20.7012	19.244	19.1795	19.5629	19.2152	19.9762	19.9899	20.0406	19.9072
ANT3_HUMAN	ADGESCSASMMYQEGK	20.03	0.118	0.47	0.64098	0.22	0.64098	19.8615	19.8215	19.4296	19.4871	20.5045	20.361	20.3118	19.952	19.4065	19.2202	19.7586	19.6274	19.828	19.929	20.2096	20.0838	20.7426	20.6477	20.9467	21.0116	20.301	20.4787	20.8853	19.9992	20.7309	20.649	21.0448	20.6187	18.9525	18.9762	20.2813	20.2068	19.3366	19.2506	18.743	NA	19.5873	19.5154	20.2308	20.0736
ANT3_HUMAN	EQLQDMGLVDLFSPEK	22.42	-0.104	-0.61	0.54825	0.37	0.54825	22.3297	22.4347	21.782	21.9196	22.3336	22.5305	22.3808	22.3016	21.9799	22.031	22.5756	22.6089	22.4883	22.3381	22.4777	22.493	22.5084	22.1562	22.9869	22.7449	22.8501	22.7093	22.7742	22.7058	23.0106	23.0636	23.1719	23.325	21.6048	21.6566	22.5737	22.6042	22.0719	21.8858	21.8959	21.7517	22.0518	22.3298	22.6463	22.7987
ANT3_HUMAN	ATEDEGSEQKIPEATNR	18.68	0.162	0.51	0.61471	0.26	0.61471	18.0234	18.3758	16.9785	17.042	19.6935	19.5507	19.5319	19.61	18.3691	17.9142	18.171	18.6168	18.6581	18.9643	18.752	18.7996	19.655	19.7621	19.1774	19.4601	18.2019	19	19.4464	19.7414	19.1029	19.0822	19.4612	19.5131	NA	NA	19.042	19.2902	17.6334	17.7524	17.0438	17.4222	18.5579	18.2494	17.9897	18.1578
ANT3_HUMAN	KATEDEGSEQKIPEATNR	18.54	0.345	1.05	0.30161	1.09	0.30161	17.9556	17.9576	17.192	17.0435	19.5454	19.5035	19.737	19.8697	18.2277	17.7932	18.1394	18.728	18.4958	18.5982	18.8732	18.6844	19.6437	19.8235	19.1969	19.267	18.1372	18.5407	19.6762	19.7552	19.1	19.2613	19.8851	20.013	16.9023	16.8349	19.1031	19.0995	17.1883	17.5589	17.1198	17.3893	18.3411	17.9839	17.7768	17.7084
ANT3_HUMAN	AFLEVNEEGSEAAASTAVVIAGR	16.71	0.191	0.38	0.70884	0.14	0.70884	17.6342	16.7954	NA	NA	17.1716	17.0791	17.3683	NA	NA	NA	16.6622	NA	16.8694	16.7337	17.4224	16.7558	15.9304	15.8337	16.2899	15.9957	17.1132	15.6394	15.5649	NA	16.923	18.2055	17.6176	16.9621	NA	NA	16.6505	16.1932	NA	NA	NA	NA	17.1214	16.2942	15.911	16.3496
ANT3_HUMAN	NDNDNIFLSPLSISTAFAMTK	21.25	-0.401	-1.13	0.26468	1.28	0.26468	20.9658	20.7985	21.1562	21.172	20.7906	20.4437	21.1973	21.4094	20.969	20.8914	21.7613	21.6414	21.4018	21.3486	21.5247	21.5623	20.2795	18.1152	21.9028	21.7302	21.3154	21.2143	21.4654	21.1251	21.8895	21.6444	22.1663	22.3522	20.9362	20.98	21.7827	21.683	21.4712	20.9902	20.7496	20.7269	21.0176	21.3623	22.1772	22.0315
ANT3_HUMAN	VAEGTQVLELPFKGDDITMVLILPKPEK	22.37	-0.521	-0.99	0.32573	0.99	0.32573	22.4337	22.063	22.6411	22.4413	22.5362	22.3082	22.4685	22.3611	22.2332	22.2756	22.7924	22.7847	22.8346	22.6704	22.8864	22.6915	19.7377	16.5844	22.9057	22.5217	22.7838	22.4275	22.8432	22.8698	22.7874	22.6182	24.0454	23.9695	22.141	21.9979	23.0962	23.0811	21.86	21.5604	22.2137	21.9191	22.5023	22.5715	22.6283	22.6711
ANT3_HUMAN	RVAEGTQVLELPFKGDDITMVLILPKPEK	18.16	-0.224	-0.56	0.58164	0.31	0.58164	18.4836	17.0865	18.1181	17.2386	18.2654	17.9223	17.9565	17.7111	17.3719	16.8396	18.1472	18.4284	18.6607	18.3017	18.7745	18.3247	NA	NA	18.7519	18.3113	18.3418	18.0554	19.1145	18.8877	18.8578	18.3033	19.8953	19.7187	17.7163	17.2199	19.4964	18.9396	16.5827	16.3999	17.3314	17.3075	18.2905	18.4872	18.6387	17.6619
APLP1_HUMAN	LVETHATR	17.51	0.44	1.63	0.11113	2.66	0.11113	NA	17.0127	18.8749	18.4463	17.3557	17.1679	18.0074	17.7596	17.9933	18.0437	17.8128	18.0961	17.6644	17.7076	NA	17.4832	17.8857	18.0281	17.3881	16.7096	16.9123	17.5259	16.9373	16.8137	16.6793	16.7803	NA	15.9609	18.0393	17.882	17.1127	16.7667	17.8363	17.7464	18.2497	18.1912	NA	18.2887	16.7624	16.4842
APLP1_HUMAN	DDTPMTLPK	21.58	0.342	1.68	0.09988	2.83	0.09988	21.5413	21.5891	22.3094	22.2096	21.7099	21.65	21.5202	21.2072	21.8992	21.9164	21.4372	21.4838	21.6163	21.6089	22.0026	21.8152	22.1202	21.905	21.6778	21.7306	21.6936	21.4878	21.5556	20.7729	21.4614	21.4426	20.0593	20.2223	21.8376	21.9364	20.7291	20.8599	21.9544	22.0026	21.6251	21.6469	22.0238	21.8779	21.6994	21.2165
APLP1_HUMAN	VIALINDQR	21.72	0.223	1.37	0.17843	1.87	0.17843	21.8871	21.6873	22.2547	22.1258	21.72	21.7565	21.6919	21.7157	22.062	21.9665	21.6471	21.5528	21.8178	21.6248	21.9144	21.8671	22.0386	22.2422	21.5779	21.5003	21.7874	21.9469	21.2815	21.381	21.5719	21.7069	20.4275	20.1989	21.995	21.8715	21.2157	21.071	22.1592	22.0246	22.0028	21.9237	22.1497	22.0617	21.7434	21.6677
APLP1_HUMAN	DELAPAGTGVSR	20.63	0.455	1.41	0.16747	1.97	0.16747	22.2547	21.9857	19.6431	19.5828	21.264	21.3915	20.7003	20.3811	20.8602	20.9533	20.013	20.1289	20.636	20.8538	21.2581	20.9766	21.5119	21.6885	20.5122	20.626	20.9927	20.4165	20.6766	20.777	21.3158	21.0314	17.9609	19.1578	19.9685	20.083	20.4784	20.3273	20.2271	20.3993	19.7658	19.8096	20.601	20.1021	22.1331	21.9015
APLP1_HUMAN	EWAMADNQSK	20.26	0.235	1.16	0.25296	1.36	0.25296	NA	20.0749	20.8506	21.1028	20.0325	20.0449	20.3637	20.0423	20.534	20.6318	19.8385	NA	20.0543	20.2052	20.6707	20.5382	20.6579	20.5324	20.2222	20.4157	NA	NA	20.0947	19.581	19.8701	19.823	NA	NA	20.3548	20.34	19.3775	NA	20.5759	20.7616	NA	20.3336	NA	20.6102	19.9888	19.6753
APLP1_HUMAN	MNPLEQYER	21.63	0.262	1.69	0.09855	2.86	0.09855	21.8073	21.7795	22.3072	22.405	21.5387	21.5376	21.5828	21.6122	22.003	21.9966	21.4225	21.2939	21.5443	21.6619	21.8632	21.8116	21.9664	21.9808	21.492	21.5687	21.6708	21.8082	21.2958	21.4411	21.3071	21.2908	20.4045	20.4137	21.8727	21.9101	20.8358	20.8593	21.9405	22.0569	21.8969	21.8535	22.0905	21.9778	21.4503	21.5587
APLP1_HUMAN	QMYPELQIAR	21.98	0.202	1.3	0.20037	1.69	0.20037	22.1637	22.0887	22.8095	22.8072	21.5359	21.6008	21.8791	21.8751	22.2918	22.2436	21.9057	22.0664	21.9391	21.973	22.1395	22.1735	22.2187	22.0687	21.8553	21.9062	21.9893	22.0331	21.5841	21.6013	21.8141	21.7805	20.8899	20.8275	22.3845	22.3037	21.2173	21.227	22.3225	22.4564	22.2962	22.2602	22.3936	22.4561	21.802	21.8529
APLP1_HUMAN	VEQATQAIPMER	22.66	0.393	1.86	0.06975	3.47	0.06975	22.7181	22.7528	23.1852	23.4677	22.7442	22.8153	23.0291	22.6794	23.0023	22.9693	22.3852	22.3358	22.6196	22.6966	22.817	23.0481	23.2247	23.219	22.5896	22.8303	22.6377	22.6329	22.4463	22.0224	22.6467	22.8152	20.9424	20.5792	23.0341	23.0875	21.5999	21.8637	22.9063	23.0708	22.7057	22.8077	23.1121	23.0217	22.7488	22.5861
APLP1_HUMAN	HYQHVAAVDPEK	21.3	0.38	1.66	0.10489	2.75	0.10489	21.3911	20.9061	22.2031	22.1265	21.2462	20.7859	22.0198	21.6901	22.0502	21.6525	21.1916	21.0786	21.2152	21.1381	22.0887	21.5064	21.4878	21.5098	21.2787	21.1602	20.7751	20.9618	21.311	20.9005	20.6133	20.7961	20.7075	20.5542	21.205	21.1727	20.4635	20.6203	21.7134	21.5406	21.6824	21.7981	22.2939	21.6462	20.7295	20.6383
APLP1_HUMAN	FQVHTHLQVIEER	18.44	0.358	1.26	0.21641	1.58	0.21641	19.0917	18.8282	18.8001	18.6345	18.6649	19.1424	19.1066	18.8257	18.4703	18.5975	18.2697	18.1093	18.5001	18.3506	18.6323	18.705	18.729	18.2797	18.5195	18.0759	18.2561	18.2099	18.233	18.1232	18.2967	18.4362	17.1109	15.9167	18.6634	18.4654	17.8693	17.1826	18.879	18.6196	18.7418	18.7578	19.0848	18.8093	18.9727	18.5483
APLP1_HUMAN	SGSCAHPHHQVVPFR	20	0.32	1.52	0.13734	2.3	0.13734	20.2745	19.7157	20.7238	20.6583	19.6247	19.3293	20.9083	20.7073	20.2848	20.1944	19.73	20.1529	20.0757	20.1073	20.4094	20.3147	20.4959	20.0681	20.0029	19.5569	19.869	19.8824	19.8034	19.5345	20.2105	NA	19.0019	19.3009	20.0811	20.0106	19.0999	19.1631	20.3732	20.2272	20.3973	20.4977	20.0352	20.3003	19.6252	19.3706
APLP1_HUMAN	AALEGFLAALQADPPQAER	22.9	0.12	0.61	0.54283	0.38	0.54283	22.9522	23.1836	23.7261	23.7819	22.5638	22.7356	22.9402	22.9766	23.2608	23.4715	23.0095	22.9331	22.9321	22.8525	22.8792	23.0269	22.5249	22.1851	22.6891	22.5322	22.9916	22.7359	22.4459	22.4082	22.6259	22.8935	21.6683	21.8539	23.1918	23.2642	22.2366	22.1315	23.5253	23.5528	23.593	23.3682	23.173	23.4378	22.6702	22.9876
APLP1_HUMAN	CLPGEFVSEALLVPEGCR	21.06	0.058	0.24	0.80916	0.06	0.80916	21.0043	21.2875	22.2998	22.2791	20.2948	20.5518	20.7415	20.755	21.4837	21.5376	21.2932	21.2135	21.2982	21.1131	21.2602	21.3062	20.5545	20.1891	20.7969	20.5579	21.0555	21.0162	20.4264	20.3525	20.8765	20.7076	19.7601	19.9811	21.6816	21.597	20.2923	20.1179	21.9914	21.8141	21.9348	21.7008	21.6856	21.9382	20.6471	21.0827
APLP1_HUMAN	RAALEGFLAALQADPPQAER	21.31	0.1	0.45	0.65543	0.2	0.65543	21.2625	21.5633	22.0945	22.2874	20.9601	21.0908	21.4358	21.4185	21.6383	21.8102	21.55	21.5244	21.4863	21.3004	21.1822	21.5181	20.5667	20.1374	20.8748	20.8543	21.3506	21.1329	20.69	20.5997	21.4053	21.1678	20.037	NA	21.7772	22.0104	20.5657	20.6239	21.7937	21.7465	22.2398	21.8872	21.609	21.7955	20.9033	21.008
APLP1_HUMAN	QALNEHFQSILQTLEEQVSGER	22.7	-0.328	-0.71	0.48141	0.5	0.48141	22.8049	22.8425	24.0535	24.2279	21.8514	21.9306	22.5388	22.7795	23.525	23.4582	23.2289	23.2686	23.2035	23.0008	22.942	23.0958	20.0151	17.6421	22.1452	22.2115	22.5622	22.6588	21.9966	21.7395	22.2801	22.5354	22.3777	22.5955	23.4617	23.5843	22.3877	22.4601	23.5582	23.5489	23.8041	23.6583	23.3656	23.7084	22.3238	22.7173
APLP1_HUMAN	HQEAQEACSSQGLILHGSGMLLPCGSDR	21.23	0.136	0.62	0.5405	0.38	0.5405	21.5716	21.0863	22.1164	21.9973	20.7838	21.0052	21.5647	21.4411	21.3909	21.6319	21.0231	21.0353	20.9249	20.8762	21.4779	21.4849	21.2779	20.9273	21.0669	21.0989	21.4289	21.0416	20.9517	20.6956	20.7888	20.5841	NA	NA	NA	21.1336	NA	NA	21.5813	20.8334	21.362	21.3588	21.7238	21.7081	21.2663	20.8594
APLP1_HUMAN	RHQEAQEACSSQGLILHGSGMLLPCGSDR	19.85	0.305	1.62	0.11349	2.62	0.11349	20.4916	19.9021	20.0458	20.3189	19.7161	19.7565	20.1768	20.1024	20.0472	19.9522	19.6893	19.7709	19.717	19.6605	20.2939	20.3118	20.2244	19.8053	20.0921	19.9472	19.9509	19.8418	19.8302	19.669	19.7177	19.389	18.5178	18.8937	19.8474	19.7459	18.8945	19.0923	20.0582	20.2036	19.8925	20.1998	20.1422	20.1883	20.0215	19.8313
APLP2_HUMAN	EMIFNAER	20.16	0.276	1.73	0.09174	2.98	0.09174	20.4387	19.9423	20.2962	20.3066	20.5606	20.5671	20.2483	20.1993	20.2731	20.2096	19.8197	19.9529	20.3763	20.3705	20.3395	20.2282	20.5116	20.574	20.3661	20.3765	20.1938	20.3476	20.4099	20.2941	20.2756	20.08	18.8641	18.92	20.214	20.3782	19.4872	19.423	20.4431	20.4667	20.3138	20.3004	20.0866	20.2443	19.9815	19.7202
APLP2_HUMAN	VSIDNWCR	18.37	0.544	1.5	0.14746	2.25	0.14746	19.0417	NA	18.204	18.7389	18.7698	18.5298	18.7958	18.5254	19.1385	19.1917	17.4716	17.6273	NA	NA	NA	NA	NA	NA	18.717	18.8597	NA	NA	NA	NA	18.5991	18.5907	16.3279	16.21	NA	NA	18.3239	18.3026	NA	NA	18.8274	18.9685	18.2907	NA	NA	NA
APLP2_HUMAN	EWEEAELQAK	16.25	0.991	2.62	0.02579	6.85	0.02579	16.6943	16.4873	NA	NA	NA	NA	NA	16.0924	NA	NA	NA	NA	NA	NA	NA	16.3023	NA	16.547	16.7474	16.4939	NA	NA	NA	NA	15.7802	NA	NA	NA	NA	NA	15.1105	NA	NA	NA	NA	NA	NA	NA	NA	NA
APLP2_HUMAN	AVCSQEAMTGPCR	15.5	0.523	1.28	0.21607	1.65	0.21607	NA	NA	15.9996	15.7579	15.9818	15.6095	NA	NA	16.0079	15.7682	NA	14.5708	NA	14.8337	15.4644	15.4412	NA	15.7751	NA	16.4246	NA	NA	NA	NA	NA	NA	NA	NA	NA	14.2934	NA	NA	NA	15.6419	15.0195	15.4522	NA	NA	NA	NA
APLP2_HUMAN	GSGVGEQDGGLIGAEEK	18.13	0.434	1.86	0.07139	3.46	0.07139	18.0085	18.3681	18.1824	18.5823	18.5472	18.6676	18.6029	18.1886	18.4525	18.5696	17.2925	17.8172	18.0532	18.3373	18.417	18.2921	18.3623	18.4859	18.4073	18.542	17.3804	17.3571	17.8606	17.3039	18.0606	18.3444	NA	NA	NA	NA	NA	NA	18.0441	18.3607	18.1507	18.4129	18.1552	17.7938	17.5941	17.4239
APLP2_HUMAN	CLVGEFVSDVLLVPEK	16.16	0.725	0.91	0.40339	0.83	0.40339	NA	NA	16.6922	16.3458	NA	NA	NA	NA	NA	NA	NA	NA	NA	NA	NA	NA	NA	NA	NA	NA	NA	NA	NA	NA	NA	NA	NA	NA	NA	NA	NA	NA	NA	NA	15.7499	15.8377	NA	NA	NA	NA
APLP2_HUMAN	MALENYLAALQSDPPRPHR	17.36	2.095	3.37	0.00981	11.37	0.00981	18.7237	NA	NA	NA	NA	NA	17.9681	NA	NA	NA	NA	NA	NA	NA	NA	17.8686	NA	NA	17.4942	17.6235	NA	NA	NA	NA	NA	NA	NA	NA	NA	NA	14.9109	NA	NA	16.9403	NA	NA	NA	NA	NA	NA
APOA1_HUMAN	AKPALEDLR	22.58	-0.039	-0.18	0.85598	0.03	0.85598	22.1017	22.2518	21.8608	21.8067	22.9854	22.8861	22.1992	21.9454	22.5465	22.902	23.2111	23.1817	23.0616	23.1223	22.7289	22.8921	22.3195	22.1573	22.6343	22.4113	23.3919	23.2255	22.9553	22.6402	23.0621	23.1622	23.4133	23.6195	22.0359	21.9916	23.2432	23.2969	21.492	21.5912	22.3118	22.3595	22.1078	22.2249	21.9979	21.8543
APOA1_HUMAN	LSPLGEEMR	25.19	-0.081	-0.44	0.66211	0.19	0.66211	24.8254	24.8538	24.298	24.5028	25.3446	25.3507	24.6341	NA	25.3368	25.2436	25.6614	25.74	25.4679	25.5889	25.4799	25.3586	24.8083	24.9359	25.2479	25.3001	25.8187	25.9252	25.6431	25.6988	25.5434	25.6024	26.052	26.0824	24.6165	24.6973	25.7304	25.7201	24.3516	24.2614	24.7878	24.8101	24.9167	24.8084	24.6013	24.642
APOA1_HUMAN	LEALKENGGAR	21.15	-0.049	-0.2	0.84502	0.04	0.84502	20.321	20.6718	20.4971	20.4807	21.4995	21.4723	20.8212	20.7591	21.4306	21.3488	21.707	22.0882	21.5389	21.7972	21.3202	21.5006	20.6546	20.5861	20.8612	21.0607	21.5966	21.8632	21.5626	21.6437	21.4656	21.6541	22.5814	22.6341	20.4442	20.4927	21.8882	22.0386	19.9567	20.1461	20.8873	21.0582	20.8701	20.5905	19.8941	20.1242
APOA1_HUMAN	ATEHLSTLSEK	22.53	0.039	0.18	0.85796	0.03	0.85796	22.0408	22.0814	21.9176	21.8847	22.7505	22.6332	22.1804	22.1666	22.8151	22.722	23.1394	23.4663	22.9268	23.0408	22.9595	22.9587	22.2515	22.0226	22.5402	22.5478	22.9917	23.166	22.8219	22.8417	22.8477	22.8317	23.914	23.8881	21.8157	21.8826	23.1566	23.2941	21.3805	21.5406	22.2133	22.2864	22.0478	22.0669	21.5125	21.7597
APOA1_HUMAN	QGLLPVLESFK	24.6	-0.087	-0.42	0.67594	0.18	0.67594	24.2689	24.4419	24.0824	24.1522	24.8333	24.9439	23.912	23.8344	24.7653	24.8541	25.3953	25.3821	25.1044	25.0427	24.7571	24.8143	23.976	23.7045	24.3923	24.3759	25.2514	25.2001	24.9023	24.8537	25.0349	24.9191	25.6881	25.9043	24.1387	24.1922	25.2951	25.1734	23.8066	23.7832	24.4726	24.2557	24.0791	24.1268	23.7483	23.9441
APOA1_HUMAN	DLATVYVDVLK	23.87	-0.064	-0.32	0.74838	0.1	0.74838	23.48	23.7446	23.2793	23.2957	23.9616	23.9169	23.3004	23.2195	24.1199	24.1436	24.555	24.4978	24.3802	24.2863	24.1865	24.2399	23.1961	22.9869	24.0421	23.9824	24.5194	24.2303	24.0672	23.893	24.1199	23.9759	25.1351	25.2754	23.3316	23.2089	24.3914	24.4144	23.2975	23.1085	23.3742	23.3194	23.4833	23.3741	23.7718	23.8131
APOA1_HUMAN	VQPYLDDFQK	24.75	-0.008	-0.04	0.96845	0	0.96845	24.4146	24.5256	23.9181	23.9449	24.9892	25.0031	24.1906	24.2715	24.8792	24.886	25.3197	25.4224	25.0179	25.1254	24.9526	24.9488	24.6043	24.7451	24.8218	24.9888	25.3335	25.4506	24.9558	25.0942	25.0932	25.1064	25.8529	25.8527	23.9714	23.9378	25.363	25.3852	23.8698	23.9559	24.2593	24.2785	24.353	24.2282	24.3583	24.4211
APOA1_HUMAN	WQEEMELYR	23.09	-0.144	-0.7	0.49047	0.48	0.49047	22.7776	22.7155	22.5827	22.6095	22.9932	22.7942	22.461	22.6755	23.3433	23.2208	23.8063	23.6833	23.5373	23.5923	23.3079	23.4538	22.198	21.8299	23.3486	23.4365	23.6628	23.6994	23.4139	23.5906	23.3837	23.3628	24.2249	24.213	22.4023	22.3051	23.8665	23.8641	22.2662	22.4308	22.7648	22.774	22.7891	22.8051	22.6571	22.7787
APOA1_HUMAN	THLAPYSDELR	23.1	-0.234	-0.92	0.36214	0.85	0.36214	22.7714	22.7705	22.674	22.5765	23.31	23.153	21.6547	21.4116	23.1683	23.3756	24.0342	23.955	23.7801	23.651	23.3378	23.4971	22.4343	22.091	23.1078	22.842	23.9147	23.7567	23.4712	22.9743	23.7643	23.6978	24.4793	24.1217	22.6011	22.5649	23.991	23.9873	22.1302	22.0828	23.0147	23.0417	22.8364	22.9591	22.5068	22.3767
APOA1_HUMAN	ETEGLRQEMSK	21.98	0.02	0.09	0.92544	0.01	0.92544	21.3457	21.333	21.2808	21.3318	22.0712	21.9119	21.5887	21.2266	22.2237	22.0636	22.4523	22.7841	22.3396	22.4429	22.3224	22.4362	22.0491	21.7947	22.3885	22.337	22.3967	22.6623	22.2966	22.2371	22.2312	22.3084	23.1844	23.362	21.2222	21.3095	22.4329	22.6106	21.0367	21.1678	21.6466	21.79	21.3913	21.4167	21.292	21.3204
APOA1_HUMAN	VSFLSALEEYTK	25.09	-0.223	-0.99	0.32626	0.99	0.32626	24.6944	24.8713	24.6632	24.7606	25.1571	25.1393	24.4086	24.4147	25.3519	25.3912	25.9891	25.987	25.5645	25.5086	25.199	25.2223	23.9123	23.5904	24.8495	24.8263	25.8793	25.7823	25.3821	25.3562	25.4338	25.5773	26.3268	26.4482	24.5238	24.5344	25.9115	25.8414	24.3785	24.399	25.0772	24.9038	24.5906	24.8325	24.2467	24.5285
APOA1_HUMAN	DYVSQFEGSALGK	24.63	0.078	0.4	0.68827	0.16	0.68827	24.4313	24.4839	23.8111	23.9117	24.812	24.8739	24.0245	24.2461	24.9058	24.6651	25.4309	25.2539	25.0252	25.1422	24.8281	24.9106	24.5396	24.6034	24.7502	24.7059	25.0623	25.2004	24.7477	24.9047	24.8775	24.8855	25.5981	25.7185	23.643	23.6983	25.3142	25.2065	23.859	23.8954	24.3007	24.2165	23.9873	24.0241	24.2906	24.3672
APOA1_HUMAN	KWQEEMELYR	22.99	-0.183	-0.72	0.47691	0.52	0.47691	22.7836	22.3027	22.6918	22.4618	22.9005	22.5608	22.6819	22.5322	22.9328	22.9658	24.0112	23.7577	23.405	23.2327	23.289	23.2565	22.1307	21.5573	23.3593	23.1845	23.7179	23.5135	23.3118	23.1396	23.4714	23.0837	24.7038	24.3488	22.3268	22.2102	23.903	23.7279	22.3309	22.1334	22.8255	22.7225	22.6142	22.7202	22.531	22.3308
APOA1_HUMAN	VKDLATVYVDVLK	18.02	0.095	0.1	0.92335	0.01	0.92335	16.627	17.2693	16.8588	16.7336	17.4231	22.2752	16.4257	16.6833	17.7132	17.5861	18.531	18.5624	18.7829	18.7128	17.9014	18.2888	16.4717	21.9768	18.0817	18.4568	19.1762	18.8755	18.2847	18.231	18.0567	18.4568	19.7572	19.621	16.5637	16.7518	18.9566	18.9168	16.6128	17.2199	17.2116	17.1731	16.9957	16.8779	18.1789	17.5519
APOA1_HUMAN	VEPLRAELQEGAR	23.12	-0.005	-0.02	0.98083	0	0.98083	22.3165	22.529	22.7181	22.7119	23.4027	23.4447	22.9756	22.6636	23.1511	23.3566	23.6611	23.6887	23.5516	23.5056	23.0701	23.027	23.1488	22.9568	23.2493	23.2146	23.7128	23.5038	23.441	23.0639	23.5515	23.6171	24.1455	24.1888	22.553	22.5881	23.4292	23.8462	22.1832	22.2688	23.0677	23.036	22.7616	22.609	22.5462	22.3271
APOA1_HUMAN	VSFLSALEEYTKK	18.39	-0.181	-0.57	0.57279	0.33	0.57279	NA	NA	17.8932	NA	18.7007	18.9524	17.9689	17.9838	18.0091	18.3946	18.8637	18.4555	18.4224	17.831	NA	NA	17.8994	17.4691	18.2409	NA	19.2562	18.8947	18.7832	18.7739	18.4915	18.264	19.7897	19.9187	17.6772	NA	18.4058	18.5077	17.3275	NA	NA	NA	NA	17.3231	NA	NA
APOA1_HUMAN	THLAPYSDELRQR	16.92	-0.186	-0.4	0.70229	0.16	0.70229	NA	NA	NA	NA	16.9444	NA	NA	NA	NA	NA	NA	NA	NA	NA	NA	NA	NA	NA	16.6292	NA	16.6063	NA	17.2744	NA	NA	NA	17.1846	16.8829	NA	NA	NA	NA	NA	NA	NA	NA	NA	NA	NA	NA
APOA1_HUMAN	LLDNWDSVTSTFSK	25.03	-0.08	-0.33	0.74023	0.11	0.74023	24.7814	24.7361	25.2717	24.4262	25.1371	24.9763	24.2933	24.4493	25.0351	25.0976	25.7604	25.7701	25.3997	25.3504	25.1607	25.2313	24.5302	24.4073	25.0166	24.9905	25.5375	25.5356	24.9813	24.9989	25.4023	25.2155	26.1638	26.3016	24.1951	24.3873	25.7667	25.6441	24.3101	24.2916	24.8681	24.7693	25.3956	24.5051	24.6766	24.4711
APOA1_HUMAN	DSGRDYVSQFEGSALGK	23.19	-0.01	-0.05	0.9575	0	0.9575	22.7704	22.7613	22.5063	22.5803	23.3798	23.3149	22.8254	22.9597	23.1977	23.2095	23.8132	23.6795	23.52	23.4588	23.0571	23.0689	23.4042	23.3889	23.4335	23.4529	23.597	23.6848	23.2332	23.494	23.3107	23.4086	24.4403	24.3878	22.4651	22.4067	23.8306	23.753	22.3965	22.3588	23.0139	23.0161	22.6563	22.8083	22.8935	22.8204
APOA1_HUMAN	EQLGPVTQEFWDNLEK	23.75	-0.152	-0.65	0.51856	0.42	0.51856	23.5347	23.5533	23.2124	23.2238	23.7038	23.6913	23.0602	22.9541	23.8676	23.9138	24.847	24.8229	24.3552	24.1181	24.0061	24.0701	22.6542	22.169	23.9345	23.8163	24.3861	24.3182	23.8145	23.7348	24.2416	24.0835	24.965	25.0775	22.9908	23.0407	24.6335	24.4263	23.2262	23.1608	23.6784	23.5097	23.2801	23.4906	23.0731	23.4219
APOA1_HUMAN	LREQLGPVTQEFWDNLEK	24.68	-0.297	-1.14	0.26115	1.3	0.26115	23.9931	24.4108	24.2776	24.349	24.6204	24.5026	24.0424	24.0965	24.8525	24.8718	25.8548	25.7642	25.1713	25.1229	24.7567	24.9625	23.179	22.4782	24.6675	24.6738	25.1821	25.0905	24.8924	24.7259	25.1182	24.7902	26.1622	26.3697	24.2074	24.297	25.4717	25.4818	24.1887	24.0617	24.8524	24.7331	24.3026	24.3212	24.0882	24.2498
APOA1_HUMAN	AKPALEDLRQGLLPVLESFK	16.18	-0.892	-1.96	0.06101	3.84	0.06101	NA	15.604	NA	14.3171	16.3943	16.565	15.9863	15.5998	16.7014	16.8967	15.1383	NA	15.1453	NA	16.3913	16.3222	NA	NA	15.6517	14.7421	17.1505	16.1538	16.9677	16.4979	16.2995	16.5826	18.4169	18.2616	NA	NA	15.8831	15.5299	NA	NA	15.4032	NA	NA	NA	NA	NA
APOA1_HUMAN	EQLGPVTQEFWDNLEKETEGLR	19.46	-0.584	-1.61	0.11499	2.6	0.11499	18.545	18.2933	19.4201	19.1948	18.9021	18.6202	18.5392	18.8204	19.4217	19.4133	20.6706	20.662	20.6051	20.2257	19.2673	19.4638	16.6938	NA	19.2038	19.1535	19.8032	19.4638	19.782	19.4728	19.2935	19.6602	21.7469	21.8412	18.8516	19.1484	20.9299	20.5659	18.9877	18.7642	20.09	20.0926	18.8728	19.4956	18.1736	18.8035
APOA1_HUMAN	LREQLGPVTQEFWDNLEKETEGLR	20.84	-0.648	-1.67	0.10295	2.79	0.10295	20.0679	19.9522	20.9659	20.8328	20.4845	20.4608	20.2874	20.2632	20.8857	20.9867	21.9098	21.8865	21.7652	21.4528	20.6983	20.6646	16.4284	NA	20.9274	20.5619	21.2645	20.9264	21.0163	21.0087	20.8902	20.7435	23.0092	23.0667	20.4022	20.2647	21.8901	21.9623	20.3273	20.0751	21.7079	21.3906	20.5284	20.711	19.9582	20.328
APOA1_HUMAN	EQLGPVTQEFWDNLEKETEGLRQEMSK	20.45	-0.316	-1.27	0.21038	1.62	0.21038	19.5787	19.1459	20.4411	20.4553	19.589	19.5054	19.6412	19.8966	20.5068	20.3559	21.3402	21.2373	21.1119	20.9216	20.1102	20.2319	NA	NA	20.5934	20.4482	20.7621	20.777	20.3082	20.4335	20.3977	20.411	22.1236	22.3265	20.1733	20.1511	21.3317	21.2984	19.7286	19.5429	21.007	20.9118	19.9002	20.2284	20.0784	20.1046
APOA2_HUMAN	EQLTPLIK	23.87	0.198	1.09	0.28415	1.18	0.28415	23.5488	23.4833	23.0905	23.3471	24.2377	24.2842	23.4883	23.5477	23.8391	23.8688	24.5301	24.3745	24.1794	24.2012	24.2477	24.1615	23.8883	24.0206	24.5099	24.5305	24.2571	24.2978	23.7489	23.7909	23.8356	23.7779	24.7043	24.5384	23.1554	23.1303	24.636	24.5565	22.9397	22.8564	23.204	23.0697	23.6975	23.5363	23.8738	23.8107
APOA2_HUMAN	SPELQAEAK	21.29	0.359	1.48	0.14751	2.18	0.14751	20.2618	20.497	20.8225	20.8261	21.8216	21.8015	21.1666	20.8477	21.4808	21.2788	21.9142	22.3419	21.5952	21.8792	22.0218	21.6589	21.3535	21.7057	21.9891	22.1222	21.0827	21.4072	21.3713	21.2965	20.7146	20.8842	22.44	22.3694	20.3675	20.439	21.98	22.108	20.2987	20.3735	20.6365	20.7631	21.4453	20.8964	20.6702	20.6637
APOA2_HUMAN	SKEQLTPLIK	21.04	0.108	0.47	0.64421	0.22	0.64421	20.5298	20.6523	20.221	20.4206	21.2891	21.2284	21.0005	20.5106	20.4848	20.8211	21.8714	21.8487	21.7336	21.6702	21.3565	21.3327	21.2508	20.8562	21.5016	21.3338	21.304	21.197	20.9669	20.3549	21.2178	21.3115	22.1076	21.8217	20.1333	20.2089	21.7113	21.9406	19.8726	19.96	20.937	20.9853	21.0391	20.9802	20.9819	20.7234
APOA2_HUMAN	VKSPELQAEAK	21.34	0.267	1.29	0.20433	1.66	0.20433	20.6972	20.9767	20.9064	20.8037	21.5979	21.4069	21.3033	21.3293	21.3081	21.1785	21.9814	22.2041	21.739	21.8373	21.5399	21.9221	21.4129	21.3861	21.9811	21.9599	21.426	21.6319	21.1457	21.1835	21.2033	21.2955	22.4899	22.4879	20.4124	20.3623	22.0393	22.0876	20.0926	20.1613	20.866	20.8799	21.1477	21.1072	20.9486	21.173
APOA2_HUMAN	SKEQLTPLIKK	13.64	0.834	0.9	0.43299	0.82	0.43299	NA	NA	NA	NA	NA	NA	NA	NA	NA	NA	NA	NA	14.053	NA	NA	NA	NA	NA	NA	NA	NA	NA	NA	NA	NA	13.2189	NA	NA	NA	NA	NA	NA	NA	NA	NA	NA	NA	NA	NA	NA
APOA2_HUMAN	EPCVESLVSQYFQTVTDYGK	24.76	-0.151	-0.42	0.6783	0.17	0.6783	24.1716	24.3813	24.7289	24.74	24.2334	24.2671	24.48	24.6019	24.862	24.9444	25.9766	25.888	25.339	25.4438	25.3061	25.5092	23.2567	21.3594	24.9804	25.1313	24.7759	24.7902	24.2618	24.2873	24.6332	24.6515	26.1024	26.3207	24.0835	24.2521	25.6866	25.7421	24.1027	24.0842	24.3711	24.5908	24.7232	25.0737	24.9755	25.1094
APOA4_HUMAN	EAVEHLQK	17.15	-0.621	-0.62	0.53651	0.39	0.53651	NA	NA	18.2599	18.0394	16.5811	16.3191	NA	15.5942	16.1309	17.5266	18.3832	18.9859	18.2648	17.1324	15.9694	15.902	15.0492	15.6348	19.7059	14.1402	15.3344	16.1508	16.3196	16.4649	15.8453	16.1894	19.8666	19.5817	NA	NA	17.5253	17.6606	NA	NA	18.0233	18.1014	18.4361	NA	17.8716	17.9585
APOA4_HUMAN	ISASAEELR	21.28	0.057	0.31	0.7574	0.1	0.7574	20.4839	20.7975	20.9716	20.9188	21.9783	22.0249	21.4224	21.1764	20.8899	21.0104	21.233	21.1028	21.5157	21.5794	21.5322	21.4326	21.6969	21.6562	21.3808	21.2872	20.8482	20.9021	21.3474	21.3377	21.421	21.5001	21.7247	22.1764	20.4562	20.4054	21.6315	21.7042	20.4978	20.5154	21.1219	21.1553	21.7013	21.2934	21.6143	21.6045
APOA4_HUMAN	LAPLAEDVR	22.28	0.038	0.25	0.8028	0.06	0.8028	21.9558	22.008	22.0007	21.8039	22.8887	22.8615	22.2506	NA	21.8045	21.9967	22.242	22.2513	22.557	22.5734	22.5651	22.4295	22.5375	22.5928	22.2593	22.2247	22.1179	22.2554	22.2529	22.2457	NA	22.5606	22.5461	22.7611	21.5244	21.533	22.4514	22.6245	21.5662	21.5838	22.0853	22.116	22.539	22.4887	22.8441	22.6829
APOA4_HUMAN	VNSFFSTFK	21.03	0.2	0.5	0.62065	0.25	0.62065	20.9045	20.9693	20.9859	21.0401	21.5851	21.5055	21.0213	21.1195	20.8601	20.7694	21.0741	20.8469	21.3425	21.3856	21.3027	21.3165	21.1328	21.1808	21.0737	21.2114	20.7692	20.9484	20.787	21.0127	21.3148	21.3169	21.8245	21.8249	20.3571	20.3904	21.5545	21.5295	20.261	20.2579	20.9367	20.8635	21.0909	21.1537	18.717	21.7158
APOA4_HUMAN	IDQNVEELK	21.16	0.118	0.54	0.59412	0.29	0.59412	20.4658	21.0359	20.6091	20.7847	21.8691	21.9593	21.316	21.2671	20.6551	20.9176	20.9098	20.983	21.0932	21.5416	21.517	21.4485	21.5561	21.723	21.2817	21.4684	20.7964	20.8932	21.2292	21.1892	21.2249	21.4701	21.5522	21.8502	20.0068	20.1822	21.3	21.7336	20.1399	20.3645	20.8956	20.8736	21.6858	21.2248	21.7536	21.6768
APOA4_HUMAN	IDQTVEELR	19.21	0.067	0.28	0.78325	0.08	0.78325	18.2313	19.064	18.8731	19.3396	19.792	19.9974	18.966	18.5859	18.7831	18.9018	19.2809	19.2062	19.4101	19.5947	19.4966	19.5319	19.4861	19.7667	19.2397	19.5146	18.9009	18.9141	19.2455	18.8769	19.3048	19.5516	NA	19.7999	18.1786	18.3935	19.3304	19.8505	18.2448	18.4558	19.0674	19.1301	19.6615	19.2827	19.8815	19.9379
APOA4_HUMAN	LEPYADQLR	21.68	-0.086	-0.29	0.76964	0.09	0.76964	NA	21.4695	21.3498	21.2363	22.2846	21.2885	NA	21.622	21.4122	21.3642	21.5427	21.7932	21.9807	22.0075	22.0509	20.4695	21.8738	21.9003	21.7312	21.859	21.3942	21.4543	21.8002	21.6938	21.991	22.0063	22.1911	22.4738	NA	20.9117	21.9227	22.164	20.8646	20.9233	21.4468	21.5814	22.0375	21.8406	22.221	22.1174
APOA4_HUMAN	VEPYGENFNK	18.63	0.053	0.27	0.7924	0.07	0.7924	17.995	18.2357	18.2957	18.4503	19.3509	19.2401	18.6858	18.289	NA	18.2829	NA	18.459	18.9822	18.8925	NA	18.8502	18.8781	18.9317	18.7097	18.8032	18.5012	18.4184	18.6246	18.174	18.7693	18.766	19.305	19.4045	NA	NA	19.0672	19.1719	17.3066	17.4748	18.1993	18.1387	18.7583	18.6921	18.9869	18.9656
APOA4_HUMAN	ALVQQMEQLR	22.51	-0.018	-0.11	0.91063	0.01	0.91063	22.3173	22.3757	22.2961	22.3323	22.7489	22.8591	22.3327	22.4606	22.1884	22.0798	22.4342	22.4362	22.6585	22.7637	22.586	22.649	22.6862	22.8415	22.4228	22.5038	22.2761	22.4684	22.125	22.5575	22.7535	22.7958	23.2428	23.1056	21.7718	21.8139	22.8177	22.7618	21.6432	21.8172	22.4134	22.4392	22.6918	22.5906	23.1594	23.0799
APOA4_HUMAN	LLPHANEVSQK	19.55	0.039	0.19	0.84788	0.04	0.84788	19.5169	19.0683	19.5575	19.268	19.814	19.5747	19.7216	19.6685	19.1209	18.9735	19.5846	19.7235	20.0032	19.761	19.7938	19.9653	19.8375	19.4558	19.6842	19.376	19.4307	19.2761	19.1772	19.1995	20.0145	19.7361	20.2771	20.3926	18.7406	18.5769	20.0166	19.7624	18.607	18.6669	19.5692	19.3877	19.5664	19.9105	20.2541	20.1308
APOA4_HUMAN	IDQTVEELRR	20.14	-0.079	-0.4	0.69276	0.16	0.69276	19.668	19.8372	19.9958	20.0495	20.6007	20.319	20.3574	20.1611	19.339	19.7191	20.0286	20.0797	20.2607	20.4505	20.0278	20.3876	20.4729	20.1125	20.1095	20.0654	19.9908	19.9652	NA	NA	20.3671	20.6159	20.9568	21.0985	19.3581	19.3064	20.4493	20.5656	19.0715	19.2684	20.1313	20.1337	20.3192	20.4664	20.5443	20.6442
APOA4_HUMAN	TQVNTQAEQLR	20.2	0.255	1.12	0.26953	1.25	0.26953	18.2527	18.8776	20.0722	20.1181	20.9161	20.9399	20.6098	20.4687	20.3852	19.9491	20.3873	20.78	20.523	20.7779	20.7406	20.4713	20.6493	20.8034	20.3717	20.5526	19.831	20.1454	20.3562	20.432	20.2478	20.4048	20.4839	20.4948	19.4997	19.5186	19.8197	19.9383	19.6132	19.688	20.1086	20.2942	19.989	19.541	20.5311	20.6122
APOA4_HUMAN	LVPFATELHER	19.98	0.113	0.38	0.70903	0.14	0.70903	19.8818	19.918	18.3863	18.339	20.664	20.6795	19.3792	19.8105	20.0673	19.9954	20.8991	21.0904	20.8165	20.8807	20.2198	20.4134	20.0251	20.379	19.241	19.5446	20.1698	20.4129	20.1206	20.3166	20.5092	20.6892	21.2331	21.1512	18.5385	18.3503	21.2141	21.2277	18.4381	19.0205	19.4951	19.4471	19.8164	19.7666	19.078	19.3828
APOA4_HUMAN	DKVNSFFSTFK	19.44	-0.093	-0.33	0.74208	0.11	0.74208	19.3272	18.9405	19.6978	18.8969	19.925	19.7305	19.3566	19.4583	18.6534	18.8216	19.7179	19.3646	20.053	19.6528	19.2981	19.5995	19.662	19.3318	19.3467	18.9539	19.1797	19.211	19.2015	19.3472	20.0679	19.5145	20.8338	20.3207	18.4729	18.1116	20.4997	19.8413	18.2629	18.3123	19.5943	19.5145	19.5358	19.6999	20.2892	19.8475
APOA4_HUMAN	SLAPYAQDTQEK	21.28	0.155	0.57	0.5685	0.33	0.5685	20.3105	21.3646	20.6606	20.9325	22.0584	22.2159	21.3946	21.6621	21.0068	20.9809	20.9797	21.2027	21.1852	21.5872	21.5789	21.4539	21.743	21.9861	21.2587	21.5395	20.628	20.9595	21.2805	21.5091	21.1214	21.777	21.9166	22.212	20.2365	20.1671	21.5028	21.7404	20.2976	20.3556	20.8503	21.0524	21.689	21.1591	21.6666	21.8805
APOA4_HUMAN	RVEPYGENFNK	20.44	0.085	0.33	0.74485	0.11	0.74485	19.8217	20.3945	NA	19.0932	21.3249	21.2698	20.7616	20.9256	19.8169	19.8837	20.1369	19.9473	20.6465	20.9121	20.5509	20.965	20.9395	20.9247	20.5689	20.8054	20.0245	20.3265	20.4688	20.6258	20.6092	20.9287	21.0776	21.2641	19.0472	18.8362	21.0415	20.9994	19.2359	19.3297	20.0442	19.9691	20.7998	20.697	21.0866	20.8732
APOA4_HUMAN	LGEVNTYAGDLQK	22.51	0.044	0.27	0.79116	0.07	0.79116	22.1545	22.1462	22.1766	22.3803	22.8474	22.9542	22.5239	22.511	22.2863	22.217	22.4484	22.6381	22.6662	22.7751	22.5963	22.6011	22.6868	22.7826	22.5535	22.6592	22.1862	22.3751	22.2943	22.5231	22.4702	22.7189	23.2738	23.3649	21.7458	21.6999	22.7695	22.9761	21.6419	21.7309	22.4503	22.1996	22.6942	22.445	23.0317	23.1271
APOA4_HUMAN	KLVPFATELHER	21.23	-0.035	-0.19	0.85157	0.04	0.85157	21.2389	20.7872	20.8974	21.027	21.4176	21.4548	21.6007	21.4748	20.793	20.6865	21.344	21.324	21.4927	21.3754	21.3634	21.1775	21.2972	21.2579	21.2523	21.0673	20.88	20.9812	21.0035	21.0514	21.4271	21.2794	22.4702	22.2959	20.5209	20.4366	21.8333	21.6003	20.3026	20.1781	21.4537	21.208	21.4197	21.3871	21.7448	21.5512
APOA4_HUMAN	TQVNTQAEQLRR	19.22	0.416	1.37	0.17915	1.88	0.17915	18.179	16.983	18.823	18.9775	20.271	20.3182	20.026	19.7972	19.2073	18.9821	19.2689	19.5202	19.3954	19.6782	19.9425	19.336	20.1469	20.1628	19.289	19.3501	18.7686	18.8771	19.3362	19.1954	19.2822	19.3229	19.3387	19.4327	17.9162	18.1411	NA	18.8503	NA	NA	19.1527	19.4021	NA	18.2597	19.638	19.2486
APOA4_HUMAN	LNHQLEGLTFQMK	22.27	-0.069	-0.44	0.65998	0.2	0.65998	22.0286	21.8827	22.3443	22.3574	22.2692	22.2017	22.2583	22.2437	21.9041	21.8978	22.5001	22.5798	22.3632	22.4112	22.358	22.4147	22.0761	22.0294	22.3105	22.2369	22.0102	22.0459	22.0423	22.1914	22.4264	22.349	23.5553	23.2141	21.6308	21.6662	22.509	22.5441	21.4016	21.442	22.2989	22.2284	22.5159	22.4703	22.7831	22.7238
APOA4_HUMAN	LKEEIGKELEELR	20.54	-0.071	-0.34	0.73915	0.11	0.73915	20.3161	20.2431	20.1886	20.3014	20.7311	20.9247	20.7745	21.007	19.9946	20.0686	20.3876	20.685	20.6002	20.8815	20.4614	20.5451	20.5767	20.5385	20.3785	20.3576	20.1402	NA	20.3933	20.4381	20.7652	20.8706	21.8372	21.9061	19.599	19.7028	20.9979	21.0428	19.0498	19.631	20.8253	20.6246	20.5863	20.8293	20.9724	20.9661
APOA4_HUMAN	SELTQQLNALFQDK	22.38	-0.075	-0.43	0.66825	0.19	0.66825	22.2542	22.4731	21.9398	22.236	22.615	22.8195	22.1851	22.2295	22.0286	22.0279	22.5451	22.6137	22.6277	22.6322	22.4555	22.5049	22.23	21.8683	22.2472	22.379	22.1693	22.1474	22.0426	22.1288	22.7817	22.7325	23.3469	23.4401	21.6	21.7014	22.8663	22.7954	21.7021	21.6593	22.3892	22.225	22.3497	22.5638	22.7214	23.0588
APOA4_HUMAN	LGPHAGDVEGHLSFLEK	21.64	-0.032	-0.19	0.85068	0.04	0.85068	21.3708	21.3912	21.355	21.3753	21.9476	22.054	21.6774	21.8365	21.2531	21.1887	21.7463	21.8439	21.7279	21.7287	21.7115	21.7464	21.6742	21.5588	21.6263	21.6648	21.4309	21.4504	21.39	21.6398	21.8106	21.7806	22.8175	22.6671	20.8888	20.7901	22.0462	22.0452	20.5561	20.6789	21.6262	21.6248	21.7317	21.8413	22.1466	22.1467
APOA4_HUMAN	SLAELGGHLDQQVEEFR	22.49	-0.005	-0.03	0.97488	0	0.97488	22.4753	22.4792	22.267	22.1356	22.7513	22.6955	22.5452	22.8384	22.1886	22.0724	22.719	22.6068	22.8126	22.8604	22.5757	22.6742	22.063	22.0804	22.3811	22.4326	22.2887	22.4571	22.0719	22.2977	22.7899	22.9332	23.2995	23.4696	21.7319	21.7278	22.9144	22.8086	21.7325	21.8252	22.4753	22.3115	22.3618	22.6044	23.0538	22.608
APOA4_HUMAN	ENADSLQASLRPHADELK	22.36	0.064	0.33	0.74195	0.11	0.74195	22.1624	21.8474	21.83	22.0443	22.7087	22.8654	22.7253	22.6283	22.0223	NA	22.5415	22.4536	22.2769	22.4264	22.4766	22.3784	22.5942	22.5837	22.3298	22.2894	22.0744	22.178	22.141	22.3295	22.2829	22.5058	23.2481	23.2197	21.4168	21.254	22.6329	22.6446	NA	21.3059	22.4019	22.3779	22.7471	22.1848	22.8182	22.7642
APOA4_HUMAN	SLAELGGHLDQQVEEFRR	22.01	-0.119	-0.64	0.52575	0.41	0.52575	21.8361	21.7534	21.8064	21.967	22.3677	22.2894	22.1952	22.285	21.6392	21.5961	22.3	21.765	22.3473	22.2376	22.0774	22.0769	21.5578	21.3792	21.9223	21.6813	21.7024	21.7038	21.6998	21.8201	22.4137	22.1809	23.1431	23.2099	21.2965	21.2558	22.5643	22.4419	21.169	21.157	22.211	22.2034	22.2425	22.2118	22.5337	22.2965
APOA4_HUMAN	TLSLPELEQQQEQQQEQQQEQVQMLAPLES	21.16	-0.654	-1.87	0.07048	3.48	0.07048	19.8253	20.6068	20.035	20.7712	21.3022	21.6411	21.7156	21.8392	20.307	20.5616	NA	NA	20.6583	20.6629	21.9781	22.0875	20.4679	19.691	20.7157	20.5469	20.1056	20.2846	21.4369	21.0839	21.9996	21.9079	22.234	22.8068	NA	NA	22.0776	22.3787	21.4869	21.2233	20.6757	20.7828	21.67	22.0068	NA	NA
APOB_HUMAN	ATGVLYDYVNK	18.06	NA	NA	NA	NA	NA	NA	NA	NA	NA	NA	NA	NA	NA	NA	18.0602	NA	NA	NA	NA	NA	NA	NA	NA	NA	NA	NA	NA	NA	NA	NA	NA	NA	NA	NA	NA	NA	NA	NA	NA	NA	NA	NA	NA	NA	NA
APOB_HUMAN	AVSMPSFSILGSDVR	17.62	NA	NA	NA	NA	NA	NA	NA	NA	NA	NA	NA	NA	NA	17.5791	17.6528	NA	NA	NA	NA	NA	NA	NA	NA	NA	NA	NA	NA	NA	NA	NA	NA	NA	NA	NA	NA	NA	NA	NA	NA	NA	NA	NA	NA	NA	NA
APOB_HUMAN	SVSDGIAALDLNAVANK	17.71	NA	NA	NA	NA	NA	NA	NA	NA	NA	NA	NA	NA	NA	17.7098	NA	NA	NA	NA	NA	NA	NA	NA	NA	NA	NA	NA	NA	NA	NA	NA	NA	NA	NA	NA	NA	NA	NA	NA	NA	NA	NA	NA	NA	NA	NA
APOB_HUMAN	FSVPAGIVIPSFQALTAR	14.99	NA	NA	NA	NA	NA	NA	NA	NA	NA	NA	NA	NA	NA	14.5167	15.4713	NA	NA	NA	NA	NA	NA	NA	NA	NA	NA	NA	NA	NA	NA	NA	NA	NA	NA	NA	NA	NA	NA	NA	NA	NA	NA	NA	NA	NA	NA
APOB_HUMAN	VPSYTLILPSLELPVLHVPR	17.34	NA	NA	NA	NA	NA	NA	NA	NA	NA	NA	NA	NA	NA	17.405	17.2657	NA	NA	NA	NA	NA	NA	NA	NA	NA	NA	NA	NA	NA	NA	NA	NA	NA	NA	NA	NA	NA	NA	NA	NA	NA	NA	NA	NA	NA	NA
APOB_HUMAN	VNWEEEAASGLLTSLKDNVPK	17.55	NA	NA	NA	NA	NA	NA	NA	NA	NA	NA	NA	NA	NA	17.6628	17.4324	NA	NA	NA	NA	NA	NA	NA	NA	NA	NA	NA	NA	NA	NA	NA	NA	NA	NA	NA	NA	NA	NA	NA	NA	NA	NA	NA	NA	NA	NA
APOB_HUMAN	IADFELPTIIVPEQTIEIPSIK	17.57	NA	NA	NA	NA	NA	NA	NA	NA	NA	NA	NA	NA	NA	17.7094	17.4384	NA	NA	NA	NA	NA	NA	NA	NA	NA	NA	NA	NA	NA	NA	NA	NA	NA	NA	NA	NA	NA	NA	NA	NA	NA	NA	NA	NA	NA	NA
APOC1_HUMAN	EFGNTLEDK	19.2	-0.623	-0.97	0.34723	0.94	0.34723	NA	NA	NA	NA	19.406	20.0286	NA	17.7021	NA	NA	NA	18.5417	NA	NA	NA	18.8605	NA	NA	NA	NA	19.2971	19.6933	19.2788	18.6458	19.3512	19.4684	18.3054	19.7888	NA	NA	19.5923	20.0624	NA	NA	NA	NA	NA	NA	NA	NA
APOC1_HUMAN	EWFSETFQK	19.55	-0.19	-0.33	0.74539	0.11	0.74539	NA	NA	NA	NA	NA	NA	NA	NA	NA	NA	NA	19.6618	19.1046	19.0327	NA	NA	NA	NA	NA	NA	NA	20.0765	18.4854	18.8197	19.8537	19.6257	20.527	20.3636	NA	17.9906	20.3316	20.2345	NA	NA	NA	NA	NA	NA	NA	NA
APOC1_HUMAN	LKEFGNTLEDK	18.09	-0.473	-1.21	0.23572	1.47	0.23572	NA	NA	17.0932	17.4445	18.5729	18.3743	16.6441	NA	17.6818	18.1234	18.621	18.6492	18.0098	17.9273	17.2344	17.7797	NA	NA	NA	NA	19.03	18.9383	17.542	NA	19.0303	19.2317	19.5689	19.2564	16.7127	16.8095	19.3339	19.5901	NA	NA	17.5847	17.6444	16.8012	17.3886	NA	NA
APOC1_HUMAN	MREWFSETFQK	18.56	-0.739	-1.82	0.07845	3.31	0.07845	16.7814	NA	17.8834	18.0538	18.5039	18.0957	17.051	17.5352	18.5093	18.4055	19.7528	19.6061	18.3582	18.3413	18.0963	18.2458	NA	NA	NA	NA	19.8154	19.5137	18.2838	18.3002	19.5887	19.3099	20.907	20.489	17.2075	17.1512	20.1513	20.0439	NA	NA	18.3755	17.8688	17.5533	17.4688	NA	NA
APOC2_HUMAN	TAAQNLYEK	16.88	-0.654	-0.71	0.52981	0.5	0.52981	NA	NA	NA	NA	16.5485	NA	NA	NA	NA	NA	NA	NA	NA	NA	NA	NA	NA	NA	NA	NA	NA	NA	NA	NA	NA	NA	NA	NA	NA	NA	NA	17.2025	NA	NA	NA	NA	NA	NA	NA	NA
APOC2_HUMAN	ESLSSYWESAK	22.02	0.307	0.42	0.67518	0.18	0.67518	22.2079	22.5672	22.1542	22.2042	22.2243	22.2615	22.6576	22.8196	22.6812	22.6298	22.646	22.5341	22.8499	23.1141	22.3082	22.2947	22.4099	22.5151	20.9197	17.5823	18.3173	19.3553	22.0649	18.5156	22.2218	22.4581	22.2568	NA	22.3433	22.3063	22.46	22.5703	22.227	22.3684	22.6513	22.6709	23.222	22.9489	22.0301	22.2547
APOC2_HUMAN	STAAMSTYTGIFTDQVLSVLK	17.3	-0.62	-0.92	0.37664	0.85	0.37664	NA	NA	16.0429	NA	NA	NA	NA	NA	NA	NA	17.8958	17.213	NA	NA	NA	NA	NA	NA	NA	NA	17.4667	17.3887	NA	NA	16.3344	16.1515	NA	17.7708	NA	NA	18.259	18.4853	NA	NA	NA	NA	NA	NA	NA	NA
APOC3_HUMAN	GWVTDGFSSLK	18.62	-0.43	-0.88	0.38572	0.77	0.38572	16.213	16.5074	18.8204	19.0521	19.8021	19.6582	16.7557	17.4822	19.3309	19.0081	20.4432	20.1882	18.9287	19.0848	17.7386	17.4655	NA	18.3362	17.0441	16.9428	20.2378	20.3795	17.7234	18.0609	19.3696	19.2955	21.3932	21.6387	18.8554	18.9242	20.5604	20.5829	16.9282	17.2435	18.9108	18.8422	16.5666	16.7524	16.5702	NA
APOC3_HUMAN	DALSSVQESQVAQQAR	19.61	-0.077	-0.18	0.85437	0.03	0.85437	NA	NA	19.1908	19.2958	20.5908	20.666	18.5862	18.6324	20.2226	19.9249	21.0006	21.2314	19.5736	19.4108	18.0269	18.2129	19.3595	19.8766	18.4732	18.741	20.5009	20.6946	18.2304	18.8015	19.8425	20.3242	21.8253	22.0627	19.4463	19.3588	20.9849	21.0609	18.0842	18.031	19.9307	19.792	NA	17.477	NA	18.59
APOD_HUMAN	IPTTFENGR	24.8	-0.152	-0.83	0.40862	0.7	0.40862	24.799	25.0993	24.3936	24.2205	24.9661	24.9485	24.9443	24.4849	24.5194	24.6961	24.7642	24.6168	24.5838	24.6319	24.7838	24.7599	24.6219	24.6688	24.9019	25.0003	24.7865	24.7863	25.0374	24.657	25.8624	25.9393	24.7251	24.5436	24.8982	24.92	24.3091	24.6573	24.4601	24.4231	24.3326	24.2247	25.0782	24.6222	25.6543	25.5314
APOD_HUMAN	NILTSNNIDVK	25.14	-0.12	-0.77	0.4441	0.6	0.4441	25.385	25.5772	24.6383	24.7619	25.0886	25.2264	25.3574	25.2055	25.0739	25.1388	25.1093	24.9718	24.8126	24.9631	25.2504	24.9669	24.6726	24.8659	25.2681	25.2654	24.9809	25.1343	25.2021	25.2752	25.8431	26.0196	25.3179	25.2904	25.1889	25.1795	24.9617	24.959	24.7731	24.8707	24.6012	24.6295	25.2043	24.8377	25.7384	25.9836
APOD_HUMAN	MTVTDQVNCPK	23.24	-0.087	-0.44	0.66081	0.2	0.66081	23.0637	23.5046	22.5867	22.8103	23.3034	23.4138	23.5744	23.3874	23.1441	23.2966	22.9589	22.9251	22.8082	23.0781	23.4	23.2405	23.0053	23.0674	23.6127	23.7855	23.1066	23.2029	23.611	23.5021	24.124	24.3288	22.8111	23.3897	23.3537	23.4528	22.7325	23.1206	22.8693	23.0006	22.387	22.5851	23.2273	22.9469	23.9701	23.9868
APOD_HUMAN	KMTVTDQVNCPK	22.64	-0.156	-0.96	0.3418	0.93	0.3418	22.8367	22.5493	22.0904	22.0503	22.3292	22.2611	23.1615	23.0703	22.5776	22.5259	22.5307	22.8257	22.272	22.4132	22.7731	22.631	22.3225	22.241	22.8816	22.9601	22.4444	22.5043	23.0286	22.9433	23.6743	23.6073	22.8481	22.9494	22.7599	22.794	22.158	22.3591	22.2476	22.3162	22.0793	22.1002	22.6742	22.4312	23.2311	23.2714
APOD_HUMAN	NPNLPPETVDSLK	24.23	-0.062	-0.34	0.73725	0.11	0.73725	24.7084	24.7258	23.1568	23.8962	24.1958	24.269	24.482	24.582	24.2992	24.2747	24.2141	24.1857	23.957	24.0879	24.2442	24.1915	23.8432	24.0441	24.3491	24.3555	23.9075	24.1057	24.2128	24.4039	25.0973	25.1396	24.3782	24.1333	24.353	24.2912	23.9538	23.9835	23.9632	23.9356	23.7087	23.5218	24.3374	24.0143	24.8987	24.9561
APOD_HUMAN	CPNPPVQENFDVNK	21.44	-0.086	-0.46	0.65002	0.21	0.65002	21.7303	22.0012	20.6316	20.7333	21.462	21.5469	21.7944	21.7367	21.2359	21.2491	21.2552	21.4323	20.9897	21.104	21.5627	21.3874	21.1395	21.2981	21.7366	21.9772	21.2135	21.4005	21.7394	21.7336	22.5514	22.5744	21.4113	21.618	21.31	21.5297	21.1248	21.2793	20.9502	21.085	20.5105	20.6404	21.2489	21.0257	22.3842	22.3988
APOD_HUMAN	WYEIEKIPTTFENGR	17.3	0.217	0.34	0.73503	0.12	0.73503	NA	NA	NA	NA	NA	NA	18.4568	18.9458	19.0166	18.6325	NA	15.44	NA	16.4782	16.1016	16.612	NA	NA	NA	NA	NA	NA	16.8065	16.7215	18.5585	18.3131	16.988	17.1517	16.8943	NA	NA	NA	NA	NA	NA	NA	NA	NA	NA	15.6313
APOE_HUMAN	QWAGLVEK	23.09	0.195	1.04	0.30513	1.08	0.30513	22.8327	22.4533	24.4269	24.3796	23.7324	23.5817	23.2468	23.1614	23.3747	23.3121	23.3879	23.3162	23.3758	23.1443	23.3356	23.2561	22.1061	22.0143	22.741	22.5884	23.2975	23.339	23.2339	23.0799	22.9548	22.8475	23.0191	22.8098	23.3238	23.3411	22.9781	22.7951	23.1111	22.9847	23.1855	23.0496	23.1497	23.0055	22.2663	22.0958
APOE_HUMAN	ALMDETMK	22.8	0.157	0.58	0.56748	0.33	0.56748	22.231	22.1926	23.3824	23.2792	23.1621	23.1858	22.8088	21.6096	23.0507	23.0699	22.8717	22.5292	23.114	23.0939	23.0339	22.9612	22.8079	22.6171	23.3656	23.2771	23.0496	22.9123	23.0379	21.836	22.8446	22.7212	22.2032	21.854	23.2575	23.2577	22.1545	22.4513	23.3266	23.2608	22.8191	22.8061	22.9314	22.7412	22.7352	22.2987
APOE_HUMAN	LAVYQAGAR	24.2	0.199	1.22	0.2296	1.49	0.2296	23.4226	23.5761	24.4851	24.3195	25.0062	24.9681	24.3862	24.1639	24.3437	24.5405	24.3203	24.1002	24.5041	24.5048	24.3552	24.3608	23.9611	23.8279	24.3869	24.2478	24.2717	24.2115	24.3257	24.2126	23.3817	23.3665	NA	NA	24.5892	24.4763	23.7911	23.8265	24.539	24.5487	24.2584	24.1964	24.2864	24.0481	23.7366	23.5634
APOE_HUMAN	DADDLQKR	13.02	2.082	2.78	0.02158	7.71	0.02158	NA	NA	NA	NA	14.6666	NA	NA	12.885	NA	NA	NA	14.3783	NA	13.6379	NA	NA	NA	12.7632	NA	NA	NA	NA	NA	10.2952	NA	NA	NA	NA	12.8051	12.7502	NA	NA	NA	NA	NA	NA	NA	NA	NA	NA
APOE_HUMAN	LGPLVEQGR	24.24	0.193	1.04	0.30585	1.08	0.30585	23.5261	23.7951	24.4822	24.5254	25.0295	25.0635	24.4818	23.8256	24.346	24.6109	24.3453	24.2122	24.6194	24.595	24.4028	24.4062	23.9535	23.9042	24.3085	24.3111	24.3807	24.3095	24.3193	23.7833	24.3078	24.3915	23.5261	23.5154	24.5942	24.5821	23.6508	24.0602	24.5199	24.4313	24.2634	24.2033	24.3891	24.1592	23.8285	23.6595
APOE_HUMAN	LQAEAFQAR	23.72	0.108	0.6	0.55059	0.36	0.55059	23.1099	23.28	24.0794	24.1244	24.4798	24.4934	24.0326	23.7373	24.0463	24.1238	23.9394	23.8953	24.1101	24.1578	24.001	23.9178	22.681	22.7089	23.2854	23.276	23.9045	23.9493	23.9427	23.4852	23.7683	23.8459	23.2604	23.3749	24.1638	24.2007	23.4144	23.5963	23.7058	23.7394	23.8175	23.823	23.9829	23.7054	22.8649	22.7687
APOE_HUMAN	RLAVYQAGAR	21.42	0.217	1.17	0.24832	1.37	0.24832	20.4243	20.7624	22.0362	21.8751	21.8871	21.7842	21.8702	21.6939	21.8098	21.806	21.6984	21.9497	21.7511	21.8604	21.6295	21.6217	20.7161	20.6126	21.4805	21.2572	21.4278	21.4892	21.5655	21.4265	20.5005	20.5512	NA	NA	21.9041	21.9106	21.2143	21.1622	21.5396	21.5835	21.6091	21.6009	21.528	21.4142	20.599	20.5485
APOE_HUMAN	LEEQAQQIR	22.65	0.237	1.13	0.26509	1.28	0.26509	21.877	22.2418	22.8126	23.0046	23.4939	23.5917	22.9558	22.9837	23.3206	23.1457	22.6866	23.0844	22.873	23.1607	23.1338	22.892	21.6782	21.9276	22.1802	22.3859	22.5141	22.8307	22.9163	23.0069	22.4035	22.5462	22.3681	22.5765	22.9335	22.998	22.2769	22.5876	22.5073	22.672	22.4897	22.7164	22.8759	22.5049	21.3659	21.5994
APOE_HUMAN	TRDRLDEVK	17.11	-0.024	-0.05	0.9588	0	0.9588	NA	16.0042	NA	NA	NA	17.1151	NA	17.4752	17.447	17.2918	NA	NA	17.183	17.2898	NA	NA	NA	NA	NA	NA	NA	NA	NA	NA	NA	NA	NA	NA	NA	NA	16.7274	NA	NA	NA	NA	17.4177	NA	NA	NA	NA
APOE_HUMAN	LGADMEDVCGR	23.69	-0.524	-1.11	0.27266	1.24	0.27266	23.9731	24.1242	24.949	25.2254	24.0316	24.0921	23.619	23.0674	24.0161	24.0509	23.6665	23.5096	23.7175	23.8286	19.5061	19.519	23.0976	23.0221	23.7438	23.8618	23.6747	23.3577	24.8496	24.092	24.6781	24.7586	24.119	23.8089	19.8296	19.919	24.1247	24.3952	24.9319	25.1088	24.6474	24.7608	24.7511	24.5239	24.4109	24.3498
APOE_HUMAN	QQTEWQSGQR	20.59	0.341	1.52	0.13927	2.3	0.13927	19.3287	19.541	NA	21.2261	21.0373	21.1905	20.913	20.8994	21.205	20.9813	NA	20.8339	20.8852	NA	21.1223	20.8583	20.4818	NA	20.9212	21.0059	19.8555	20.3324	20.7577	20.7773	19.7705	19.8283	NA	20.4655	20.7285	NA	NA	20.4344	20.7975	21.1276	20.6772	20.809	21.0741	NA	19.3102	19.6938
APOE_HUMAN	LDEVKEQVAEVR	20.9	0.126	0.61	0.54372	0.37	0.54372	20.0699	20.3635	21.2602	21.4678	21.6792	21.7308	21.404	21.0885	21.0819	21.2196	21.1695	21.0494	21.2535	21.3665	20.9825	20.8886	20.1131	20.2277	20.3697	20.5319	20.8879	20.8953	21.0668	20.5135	20.9464	21.1244	20.5393	20.8717	21.297	21.4229	20.49	20.7824	20.8383	21.0248	21.2775	21.3635	21.1507	20.8316	19.6696	19.8032
APOE_HUMAN	AATVGSLAGQPLQER	23.85	0.168	1.1	0.27926	1.2	0.27926	23.1931	23.2357	24.0517	24.2192	24.4095	24.4484	24.0205	24.1347	24.287	24.2465	24.1498	24.2692	24.1861	24.3149	23.9466	23.9172	23.1648	23.3767	23.4678	23.6507	24.0131	24.2575	23.6619	23.827	23.4999	23.738	23.4465	23.4322	24.2912	24.2292	23.6301	23.6248	23.8504	23.8682	23.9321	23.8802	23.9182	23.7811	23.16	23.2957
APOE_HUMAN	SWFEPLVEDMQR	24.18	-0.168	-0.6	0.54913	0.36	0.54913	23.9591	23.8211	25.0016	25.0408	24.3867	24.1684	24.1232	24.0506	24.5219	24.5227	24.8516	24.8275	24.7817	24.5717	24.4455	24.6153	21.8694	21.2063	23.6416	23.4634	24.4154	24.335	24.0963	24.0528	24.3581	23.9515	24.3279	24.3952	24.98	24.8517	24.3086	24.0584	24.4381	24.3181	24.7024	24.3946	24.2567	24.6581	23.0571	23.2661
APOE_HUMAN	VQAAVGTSAAPVPSDNH	22.31	0.21	0.89	0.38083	0.78	0.38083	21.4627	21.971	22.7267	23.0335	22.9291	23.052	22.9073	22.7207	22.7836	22.9397	22.3108	22.6233	22.2595	22.6101	22.6522	22.4896	21.3169	21.3404	22.0005	22.1255	22.1907	22.49	22.5797	22.5967	22.0732	22.3264	21.7011	22.3276	22.6595	22.7721	21.7838	22.2826	22.2316	22.3569	22.3664	22.5397	22.668	22.3003	20.9381	20.8776
APOE_HUMAN	VEQAVETEPEPELR	22.64	0.342	2.17	0.03585	4.71	0.03585	22.3134	22.6262	22.821	22.9644	23.4613	23.4733	23.0982	22.9163	22.9868	23.1501	22.4013	22.7007	22.692	22.8943	22.8447	22.7578	22.1203	22.2334	22.8389	22.901	22.5685	22.6367	22.6155	22.4137	22.5302	22.7519	21.9832	22.0974	22.816	22.9596	21.9617	22.3357	22.6477	22.8515	22.3574	22.3882	22.566	22.3733	22.2478	22.2629
APOE_HUMAN	GEVQAMLGQSTEELR	24.42	0.156	1.28	0.20787	1.64	0.20787	24.0263	24.1011	24.8149	24.9085	24.6735	24.7799	24.4411	24.4859	24.693	24.7112	24.6263	24.509	24.5216	24.6635	24.5272	24.509	23.9199	23.9259	24.497	24.5601	24.4941	24.634	24.2933	24.3948	24.3039	24.3134	24.1062	24.0044	24.7588	24.7298	23.9509	23.9841	24.5574	24.6541	24.4561	24.4507	24.4118	24.2441	23.9735	24.0647
APOE_HUMAN	DRLDEVKEQVAEVR	21.62	0.06	0.34	0.73606	0.12	0.73606	21.369	21.2152	21.9484	22.028	22.1563	22.2372	22.0688	22.2411	21.8954	21.9377	21.9911	21.762	21.9321	22.0269	21.6371	21.7037	20.4196	20.4313	20.8707	21.0814	21.6905	21.7761	21.5717	21.7451	21.6802	21.6481	21.7034	21.7767	21.97	21.9661	21.4489	21.4172	21.4992	21.5478	21.9627	21.9971	21.5499	21.6896	20.5589	20.5576
APOE_HUMAN	SELEEQLTPVAEETR	24.78	0.194	0.99	0.3259	0.99	0.3259	24.4982	24.5372	24.7536	24.8809	25.1337	25.2378	24.9983	24.9483	24.9986	25.0763	24.6517	24.6932	24.8455	24.9871	24.9648	24.7436	24.6523	24.8602	24.9885	25.0399	24.5419	24.7993	24.4762	24.7448	24.6545	24.6078	24.1397	24.3359	25.7077	24.7831	25.1009	24.4219	24.8059	25.149	24.603	24.6101	24.6798	24.6064	24.3457	24.4944
APOE_HUMAN	LKSWFEPLVEDMQR	17.3	0.463	0.98	0.33737	0.97	0.33737	NA	NA	NA	NA	17.0381	NA	17.3924	16.8763	NA	NA	NA	NA	17.7969	17.4443	17.2725	17.9553	NA	NA	18.0334	17.8671	NA	NA	NA	NA	16.4187	15.8716	NA	NA	NA	16.436	NA	NA	19.1935	18.9194	16.9008	NA	16.5358	16.4916	16.9834	NA
APOE_HUMAN	WVQTLSEQVQEELLSSQVTQELR	24.38	-0.116	-0.39	0.70144	0.15	0.70144	23.4328	23.8073	25.3291	25.2042	24.0102	24.4687	23.985	24.4262	24.8935	24.9318	24.94	24.8747	24.9113	24.7784	24.5332	24.6612	22.9596	21.753	24.2929	24.2837	24.2619	23.8716	24.0164	24.0775	23.7965	23.9903	24.6023	24.7644	24.9937	24.9798	24.1397	24.2685	25.0688	25.0584	24.8264	24.7233	24.4725	24.8783	23.665	24.3318
APOH_HUMAN	TDASDVKPC	17.64	0.03	0.08	0.93531	0.01	0.93531	16.0811	15.8861	17.1237	16.7586	18.5595	18.2814	18.1276	17.7349	17.622	17.5215	17.9743	18.6311	17.8788	18.0476	NA	16.2238	18.7324	19.138	18.0545	17.6728	16.2743	17.207	18.5718	18.3664	17.3324	17.1895	18.9467	18.5504	16.6676	16.7973	18.3958	18.42	17.278	17.1972	17.3929	17.4552	18.8002	17.6919	16.8525	16.4992
APOH_HUMAN	ATVVYQGER	20.13	-0.033	-0.13	0.89963	0.02	0.89963	19.5995	19.7689	18.8268	19.886	20.5626	20.6638	20.3057	20.2096	20.1722	20.0739	20.1129	20.428	20.1197	20.4153	19.57	18.8316	20.7785	21.1041	20.3016	20.4632	19.8344	20.1582	20.7406	20.797	20.4409	20.5553	20.4632	20.5503	19.391	19.4771	20.1563	20.5012	19.6576	19.9128	19.5509	19.9362	20.3241	19.9143	20.1874	20.3029
APOH_HUMAN	EHSSLAFWK	21.09	0.028	0.12	0.9031	0.02	0.9031	21.3123	21.1957	20.8129	20.5746	21.0432	20.7126	21.3908	21.3764	20.674	20.7056	21.7614	21.7441	21.5912	21.4109	20.117	20.2878	21.2136	21.1458	21.5542	21.2097	21.2985	21.1622	21.4513	21.3154	21.9931	21.6956	22.2682	22.024	20.8082	20.7176	21.9272	21.548	20.9097	20.9012	19.8373	19.7757	20.2632	20.2686	20.5149	NA
APOH_HUMAN	KATVVYQGER	16.75	0.222	0.58	0.57826	0.34	0.57826	NA	NA	NA	NA	NA	NA	NA	16.5889	NA	NA	NA	NA	NA	16.6571	NA	NA	NA	17.45	NA	16.6771	NA	16.2355	16.906	NA	16.7235	NA	NA	NA	NA	NA	NA	NA	NA	NA	NA	NA	NA	NA	NA	NA
APOH_HUMAN	VCPFAGILENGAVR	23.09	-0.308	-1.94	0.05933	3.76	0.05933	23.0703	22.8711	22.3443	22.3303	23.1726	23.1205	23.0361	23.1479	22.6266	22.6758	23.4811	23.4509	23.3312	23.3259	21.8001	22.0228	23.407	23.3744	23.1125	23.0233	23.0688	23.2904	23.2661	23.2537	23.9022	23.8459	23.5765	23.654	22.6868	22.7872	23.296	23.2866	22.9618	22.8952	22.9272	22.9864	23.0047	23.1566	23.493	23.5368
APOH_HUMAN	FICPLTGLWPINTLK	21.32	-0.808	-2.84	0.00707	8.04	0.00707	20.9489	20.8206	21.4041	21.3326	20.4766	20.3954	20.7524	21.0964	21.1151	21.0245	22.2891	22.3489	21.9462	21.7945	20.2329	20.4311	19.4548	18.3471	21.1093	21.0515	21.0091	21.1589	21.579	21.4433	21.9538	22.0389	22.6582	22.7862	21.1812	21.4194	22.1157	21.994	21.4005	21.3655	21.55	21.4426	21.7608	22.1418	21.6386	21.8925
APOH_HUMAN	KFICPLTGLWPINTLK	21.3	-0.608	-2.09	0.04374	4.35	0.04374	21.2528	NA	21.0313	20.8487	20.8184	20.4027	19.6125	21.0052	21.0104	20.9322	22.1464	22.0322	21.8923	21.519	20.0972	20.0698	NA	NA	21.0685	20.7262	21.3165	21.055	21.4436	21.1766	22.019	21.5097	22.1636	22.333	21.1462	20.9916	21.9962	21.8581	21.4478	21.1481	21.8171	21.6207	21.6448	21.8624	21.5951	21.6583
APOH_HUMAN	TCPKPDDLPFSTVVPLK	23.66	-0.194	-1.12	0.26801	1.26	0.26801	23.5603	23.7353	22.8981	22.7938	23.6196	23.5947	23.7225	23.9102	23.3724	23.2374	24.0078	23.9326	23.8675	23.8731	22.4706	22.5172	24.1212	24.1783	23.9187	23.8591	23.7133	23.826	23.801	23.9366	24.2986	24.3603	24.1066	24.2639	23.0341	23.187	24.0735	23.9738	23.2599	23.3996	23.4234	23.29	23.4996	23.6141	24.1301	23.8809
APOH_HUMAN	CSYTEDAQCIDGTIEVPK	19.4	0.017	0.11	0.91595	0.01	0.91595	19.275	19.2147	18.6988	19.2436	19.4556	19.5289	19.6776	19.5279	19.2762	19.3354	19.2014	19.2475	19.417	19.6244	18.7532	18.8853	20.0843	19.9682	19.8577	19.8399	19.474	19.4753	19.6528	19.7143	19.8532	19.6428	19.2888	19.1122	19.1585	19.1025	19.2548	19.2123	19.4225	19.5428	18.4469	18.7319	19.6822	19.5192	19.7499	19.7276
APOH_HUMAN	TFYEPGEEITYSCKPGYVSR	22.17	-0.383	-2.14	0.0381	4.59	0.0381	21.984	21.965	21.5514	21.3877	22.0503	21.9714	22.2194	22.3848	21.7781	21.7757	22.7678	22.3506	22.3978	22.2039	20.8737	20.8515	22.3129	22.207	22.2875	22.2276	22.1855	22.1319	22.3602	22.4837	22.7708	22.7967	23.0672	23.0049	21.6024	21.626	22.6575	22.5312	22.0662	21.8404	22.3655	22.1251	22.2335	22.0182	22.6491	22.6999
APOH_HUMAN	ATFGCHDGYSLDGPEEIECTK	22.44	-0.183	-1.1	0.27878	1.2	0.27878	22.3868	22.3328	21.6748	21.8319	22.3825	22.4068	22.5558	22.7924	22.1685	22.1864	22.6827	22.8318	22.4976	22.6017	21.2262	21.2704	22.862	22.8489	22.7068	22.7953	22.3754	22.495	22.5933	22.7356	22.9725	22.9691	23.1239	23.1849	21.8457	21.9585	22.8102	22.8231	21.9029	22.033	22.1889	22.2443	22.4395	22.4699	22.7342	22.8045
APOH_HUMAN	CPFPSRPDNGFVNYPAKPTLYYK	20.88	-0.478	-1.69	0.09939	2.85	0.09939	20.7437	20.378	21.0935	20.1385	20.5093	20.3803	20.9519	21.0363	21.2587	21.1269	21.1564	21.0569	20.8132	20.7699	19.4609	19.4372	20.6749	20.3951	20.9362	20.9419	20.7368	20.6862	20.9889	21.0348	21.3764	21.0587	21.8144	21.5354	21.0581	20.9321	21.0099	21.0047	21.2575	20.2801	NA	21.6698	21.8623	20.6779	21.1283	21.1243
APOH_HUMAN	WSPELPVCAPIICPPPSIPTFATLR	22.62	-0.157	-0.44	0.65885	0.2	0.65885	22.1966	22.5156	22.7264	22.8934	22.0564	22.0765	21.964	22.9338	22.8179	22.8391	23.5785	23.7765	23.2769	23.2419	21.7841	22.3391	21.734	20.4097	22.7977	22.9186	22.5215	22.5888	22.8329	23.1258	22.0151	22.2422	24.0094	24.2151	22.6741	22.8702	23.3448	23.4368	22.7973	23.0184	21.7689	21.8899	21.8017	22.5061	21.7024	22.6458
APOM_HUMAN	SLTSCLDSK	16.7	-1.129	-1.55	0.14455	2.41	0.14455	NA	NA	NA	NA	15.9682	16.7954	NA	NA	16.5144	NA	NA	NA	NA	NA	NA	NA	15.0435	15.7639	NA	16.4825	16.3402	16.3297	NA	NA	NA	NA	17.856	18.772	NA	NA	16.9768	17.6005	NA	NA	NA	NA	NA	NA	NA	NA
APOM_HUMAN	WIYHLTEGSTDLR	17.26	-0.54	-0.7	0.50125	0.49	0.50125	NA	NA	NA	NA	NA	NA	NA	NA	16.0919	NA	17.1488	17.523	NA	NA	NA	NA	NA	NA	NA	NA	16.1783	NA	NA	NA	NA	NA	18.6513	18.6299	NA	NA	16.6901	17.1747	NA	NA	NA	NA	NA	NA	NA	NA
APOM_HUMAN	EELATFDPVDNIVFNMAAGSAPMQLHLR	16.73	NA	NA	NA	NA	NA	NA	NA	NA	NA	NA	NA	NA	NA	NA	NA	NA	NA	NA	NA	NA	NA	NA	NA	NA	NA	NA	NA	NA	NA	NA	NA	16.9382	16.5236	NA	NA	NA	NA	NA	NA	NA	NA	NA	NA	NA	NA
ARFP1_HUMAN	KYENILK	23.57	0.028	0.19	0.85008	0.04	0.85008	23.2079	23.2918	23.8523	23.8403	23.554	23.5629	23.8167	23.3542	23.5074	23.6145	23.424	23.3517	23.4268	23.4803	23.7557	23.5751	23.6821	23.486	23.9051	23.9157	23.2464	23.3372	23.548	23.2158	23.6915	23.8303	23.2716	23.6596	23.7299	23.6936	23.2394	23.3376	23.5724	23.5501	23.7271	23.8715	23.9003	23.6092	23.6738	23.3375
ASAP1_HUMAN	GDLKGVKGDLK	15.04	NA	NA	NA	NA	NA	NA	NA	NA	NA	NA	NA	NA	13.5042	NA	NA	NA	NA	NA	NA	NA	NA	NA	NA	16.581	NA	NA	NA	NA	NA	NA	NA	NA	NA	NA	NA	NA	NA	NA	NA	NA	NA	NA	NA	NA	NA
ATRN_HUMAN	SEAACLAAGPGIR	16.56	0.436	1.09	0.3055	1.18	0.3055	16.146	16.3236	NA	NA	NA	16.859	16.47	NA	NA	NA	NA	NA	NA	NA	NA	NA	17.1532	17.0812	NA	NA	NA	NA	NA	NA	NA	NA	NA	NA	NA	NA	NA	NA	NA	NA	NA	16.0562	NA	NA	NA	16.4136
ATRN_HUMAN	LTGSSGFVTDGPGNYK	15.66	0.078	0.24	0.80968	0.06	0.80968	NA	15.6539	14.8142	15.2875	NA	15.8763	NA	15.313	15.4318	NA	NA	15.8332	NA	NA	NA	14.7662	16.2546	16.8321	16.068	16.3616	NA	NA	NA	15.3288	NA	NA	15.74	15.681	NA	NA	16.2612	16.2742	NA	NA	14.6811	NA	15.11	15.01	NA	16.2942
ATS1_HUMAN	LHAFDQQLDLELRPDSSFLAPGFTLQNVGR	18.99	0.069	0.2	0.84418	0.04	0.84418	18.3623	18.1051	20.6081	20.1575	18.0284	17.5113	18.3386	18.391	19.2255	19.0204	19.9158	19.6336	19.5378	18.9916	19.0671	19.2506	NA	NA	19.1675	18.5669	18.8687	17.8456	18.4015	18.3246	NA	17.6798	19.6104	19.5086	19.9619	19.635	18.9118	18.4784	19.3072	18.731	19.7222	19.1332	19.3194	19.7936	18.5159	18.8664
ATS4_HUMAN	MSQTGSHPGR	17.77	-0.592	-0.95	0.34659	0.91	0.34659	20.9314	20.3132	15.4825	14.6609	NA	17.8295	18.233	17.7119	16.8056	17.3107	17.5547	16.9317	18.1404	17.3657	16.1732	16.7792	17.3639	16.4872	18.24	17.3462	19.556	18.9593	16.6307	15.8556	20.8608	20.4883	17.1057	16.0813	17.8403	17.5148	18.2027	17.5675	17.8469	17.3647	16.3749	15.9145	16.688	17.9151	21.5395	20.9732
B2MG_HUMAN	VNHVTLSQPK	23.33	0.019	0.15	0.8822	0.02	0.8822	23.3835	23.4606	23.4896	23.5694	23.2995	23.1688	23.6942	23.6291	23.3793	23.2843	23.0894	23.3351	23.3014	23.451	22.9791	23.3578	23.3513	23.2599	23.1863	23.1389	22.9348	23.1478	23.7408	23.8498	23.2449	23.3188	23.1023	23.0723	23.3505	23.3994	23.6455	23.8946	23.1511	23.2354	23.087	23.195	23.2466	23.2863	23.1779	23.3409
B2MG_HUMAN	VEHSDLSFSK	23.69	-0.033	-0.26	0.79735	0.07	0.79735	23.6676	23.899	24.0086	23.9288	23.6598	23.6108	23.9716	23.8489	23.4521	23.6947	23.5301	23.5162	23.6622	23.7959	23.4619	23.595	23.611	23.4442	23.6043	23.5428	23.4425	23.5149	24.1247	24.0542	23.6267	23.7738	23.04	23.413	23.8204	23.8621	24.2483	24.2718	23.5467	23.6015	23.5124	23.5364	23.668	23.6593	23.7101	23.746
B2MG_HUMAN	DWSFYLLYYTEFTPTEK	16.41	0.114	0.13	0.89445	0.02	0.89445	NA	17.9738	18.619	18.8613	NA	18.2523	NA	NA	15.5565	14.9681	16.8493	16.6858	15.7458	15.8253	NA	NA	16.5644	15.0746	13.3346	14.7996	15.045	15.9041	17.0806	16.396	17.1655	NA	NA	15.9172	17.4477	18.1759	17.0744	17.9088	16.5519	12.9994	16.7296	16.3587	NA	16.0348	NA	NA
B2MG_HUMAN	SNFLNCYVSGFHPSDIEVDLLK	24.35	-0.432	-1.32	0.19421	1.74	0.19421	24.3985	24.4235	25.2613	25.1461	23.5151	23.7406	24.2546	24.3396	24.5575	24.521	24.6389	24.6489	24.654	24.4976	24.387	24.4944	22.3701	20.671	24.1991	23.9962	24.0155	23.8175	24.617	24.6358	23.7682	23.9945	24.4137	24.6429	24.842	24.8498	25.0507	24.9929	24.8159	24.6969	24.7193	24.6101	24.592	24.8522	24.5805	24.8502
B2MG_HUMAN	DWSFYLLYYTEFTPTEKDEYACR	15.66	-1.043	-0.97	0.33621	0.95	0.33621	14.8805	16.6008	17.7975	17.6037	13.1922	17.6442	14.3569	NA	13.7296	NA	15.4162	15.4444	15.3341	14.2295	14.5978	NA	15.421	13.4031	NA	13.1329	14.5669	15.6453	16.9168	15.3038	16.4693	13.5135	16.3898	16.2888	17.2421	17.6852	16.9312	16.5124	14.6617	NA	17.3712	17.2597	16.6485	14.6951	17.3011	13.7865
B2MG_HUMAN	SNFLNCYVSGFHPSDIEVDLLKNGER	21.45	-0.685	-1.68	0.10059	2.82	0.10059	21.3053	21.1457	22.1277	22.003	20.7367	20.8593	21.309	21.2344	21.1237	21.0399	22.0148	21.7669	21.9384	21.7394	21.7223	21.5213	19.4066	17.0619	21.2031	20.9412	20.9912	20.7279	21.8459	21.5618	21.2043	21.0289	21.6708	21.7157	22.0245	21.8686	22.4076	22.2688	22.3638	22.0464	22.6424	22.5007	21.8357	22.121	21.405	21.6638
B3GN1_HUMAN	SCQEVFDK	20.3	0.343	1.74	0.08887	3.04	0.08887	19.9549	20.1721	20.6959	20.8078	20.6892	20.6735	20.2249	20.2123	20.7245	20.4953	20.0634	20.5055	19.8864	20.1792	20.5926	20.4243	20.8646	21.139	20.5525	20.6506	20.0513	20.4331	20.285	20.4201	19.4269	19.6483	19.2573	19.6481	20.6993	20.8007	19.7808	20.0683	20.5402	20.6077	20.5162	20.6542	20.6194	20.5037	19.2125	19.4792
B3GN1_HUMAN	YEAAVPDPR	20.41	0.247	1.48	0.14529	2.2	0.14529	20.3175	20.2366	20.6364	20.5424	20.8052	20.7107	20.2852	20.0916	20.5153	20.5425	20.2191	20.1851	20.0409	20.1931	20.7	20.7646	21.19	21.1042	20.8495	20.7648	20.6198	20.6042	20.4996	20.3371	20.051	19.9055	19.1239	19.4629	20.8552	20.8271	20.1351	20.0951	20.8404	20.8041	20.4272	20.3436	20.732	20.776	19.7701	19.543
B3GN1_HUMAN	EPGEFALLR	21.67	0.122	0.85	0.39882	0.73	0.39882	21.6685	21.7518	22.1024	21.9383	21.7871	21.7807	21.3018	21.3987	21.7048	21.7676	21.7655	21.5652	21.4078	21.4381	21.7945	21.8079	21.9572	22.0737	21.6977	21.8263	21.7474	21.8551	21.3543	21.4952	21.3629	21.3832	20.911	20.7359	22.2017	22.117	21.4077	21.294	22.0021	21.9995	22.0302	21.9923	22.0749	22.0369	20.9891	21.1008
B3GN1_HUMAN	WEGPLSVSVFAATK	20.91	-0.126	-0.5	0.61689	0.25	0.61689	20.0672	20.6963	21.9485	21.925	20.3394	20.2625	19.9371	20.3617	21.3289	21.2144	21.444	21.4176	20.9042	20.946	21.0417	21.2458	20.2236	19.6703	20.9249	21.0512	20.8399	20.793	20.5071	20.3962	20.1679	20.0146	20.8858	21.0974	21.8477	21.8731	20.7288	20.7858	21.6655	21.6508	21.5718	21.5521	21.277	21.4159	19.8821	20.527
B3GN1_HUMAN	TALASGGVLDASGDYR	19.92	1.131	0.39	0.70635	0.15	0.70635	NA	NA	22.2907	NA	20.2114	NA	NA	NA	NA	NA	21.8204	17.3277	NA	NA	NA	NA	NA	NA	NA	NA	NA	NA	NA	NA	NA	18.0162	20.9592	NA	NA	NA	21.3886	NA	NA	17.3856	NA	NA	22.52	17.2473	NA	NA
B3GN1_HUMAN	EEAQLATVLAYALSSHCPDMR	21.69	-0.089	-0.45	0.6586	0.2	0.6586	21.6913	21.6351	22.6114	22.6279	20.9083	21.4291	21.2207	21.1207	21.8876	21.9975	21.959	21.919	21.4829	21.2656	21.9321	21.8195	20.803	20.5578	22.0911	21.8818	21.9248	21.6644	21.4276	21.292	21.1549	21.0673	21.4444	21.4639	22.3508	22.2892	21.316	21.2981	22.4246	22.3027	22.4082	22.2303	22.0427	22.1166	21.1356	21.2644
B3GN1_HUMAN	EMLDQSNQWGGTALVVPAFEIR	21.2	-0.11	-0.37	0.71193	0.14	0.71193	21.139	21.1834	22.2234	22.3093	20.3229	20.736	20.6914	20.7017	21.7498	21.4098	21.7923	21.584	21.1266	20.819	21.6439	21.5054	20.2768	19.0212	21.4939	21.2014	21.2364	20.8633	20.9741	20.6793	20.5908	20.3253	21.0485	21.2127	21.9544	21.8982	21.1691	21.1985	22.1519	21.9521	21.8652	21.6144	21.5152	21.7915	20.2951	20.7873
B3GN1_HUMAN	ISQACELHVAGFDFEVLNEGFLVHK	21.62	-0.196	-0.59	0.55826	0.35	0.55826	21.597	21.3068	22.8356	22.4372	21.1496	21.6411	21.4468	20.9182	22.2096	22.2438	22.227	21.943	21.7399	21.2969	22.2416	21.9404	19.6683	18.7392	21.6556	21.239	21.8133	21.241	21.6462	21.2618	20.9437	20.6016	21.7484	21.5946	22.5638	22.3658	21.7516	21.4054	22.3142	21.7515	22.4494	22.0584	22.4248	22.1531	21.1037	21.2056
B3GN1_HUMAN	TTMDPNDVILATHASVDNLLHLSGLLER	18.65	-0.503	-0.76	0.45172	0.58	0.45172	17.9006	20.1175	20.3329	20.8027	16.1612	15.6937	17.4325	16.6343	19.0251	20.9535	19.1904	18.6963	18.1727	17.8952	18.9059	19.9691	16.2565	NA	18.4711	17.8111	18.1059	16.7578	17.4336	17.4941	18.9081	NA	18.3889	18.6618	20.8153	20.9714	18.1632	17.5381	19.5886	19.7894	20.0021	20.4635	19.063	20.2378	18.0247	17.7454
B3GN1_HUMAN	WVNLPEESLLRPAYVVPWQDPWEPFYVAGGK	18.24	0.188	0.21	0.83747	0.04	0.83747	NA	NA	19.9084	20.3241	NA	NA	NA	NA	17.6213	17.5994	18.4353	18.6774	17.7906	NA	17.1705	19.7604	NA	NA	NA	17.1069	NA	NA	NA	16.39	NA	NA	17.2242	19.3965	19.3005	19.2767	17.1411	17.4446	NA	18.5218	18.328	NA	NA	19.7781	16.0876	17.9024
BAI2_HUMAN	LLAPAALAFR	16.5	-0.011	-0.03	0.975	0	0.975	16.0269	16.2246	17.3239	17.185	16.3656	15.941	15.6134	15.9948	16.7636	16.4912	NA	NA	16.965	NA	15.6323	16.154	17.1707	17.3721	15.688	NA	16.652	16.9151	15.3968	NA	NA	16.2813	NA	NA	17.1835	17.3026	NA	15.1714	17.1928	17.0633	17.6483	17.4138	16.4472	17.0519	15.8837	14.9743
BASP1_HUMAN	ESEPQAAAEPAEAK	12.58	NA	NA	NA	NA	NA	NA	NA	12.5294	13.004	11.5477	NA	NA	NA	12.6075	NA	NA	NA	NA	NA	NA	NA	12.6039	13.1664	NA	NA	NA	NA	NA	NA	NA	NA	NA	NA	NA	NA	NA	NA	NA	NA	NA	NA	NA	NA	NA	NA
BDP1_HUMAN	ETEKNASK	18.18	0.619	1.38	0.17778	1.91	0.17778	NA	17.6816	NA	NA	18.9908	19.42	18.9366	18.9707	18.7884	18.755	17.3981	18.6157	NA	18.4728	18.1861	17.6612	NA	18.687	NA	17.3727	NA	16.2821	NA	17.4172	NA	17.6718	NA	18.0896	NA	NA	17.7414	18.6692	17.2974	NA	18.2227	18.929	19.1496	17.914	NA	17.3509
BGH3_HUMAN	ILGDPEALR	16.53	-0.611	-1.5	0.15858	2.26	0.15858	NA	NA	15.6431	15.402	NA	NA	16.9193	NA	NA	NA	16.1545	NA	NA	NA	NA	NA	NA	NA	NA	NA	16.5456	NA	NA	NA	NA	NA	NA	NA	NA	NA	NA	NA	17.3519	17.1039	16.9792	16.6356	16.6703	16.472	NA	NA
BGH3_HUMAN	YGTLFTMDR	16.97	-0.198	-0.53	0.60182	0.28	0.60182	NA	NA	NA	NA	NA	NA	NA	NA	NA	16.3614	NA	NA	NA	16.579	16.5519	NA	NA	NA	NA	17.4355	NA	NA	NA	NA	16.829	17.3565	16.0743	NA	NA	NA	16.6629	NA	17.2037	17.6236	16.8694	NA	16.6041	NA	17.6355	17.7232
BGH3_HUMAN	LTLLAPLNSVFK	18.45	-0.526	-2.52	0.01639	6.36	0.01639	18.5112	18.6068	18.1009	17.9839	18.397	18.6727	18.5599	18.2167	NA	18.0652	NA	18.3352	18.3039	18.0903	18.2223	18.1228	17.3081	17.4396	18.4123	18.2874	18.7233	18.0686	18.8173	18.8496	18.7803	18.9392	NA	NA	18.4924	18.3026	NA	NA	19.0967	18.7288	19.1948	18.7161	18.47	18.5311	18.7819	19.1504
BGH3_HUMAN	GDELADSALEIFK	18.04	0.144	0.66	0.51578	0.43	0.51578	17.8258	NA	17.5655	18.2186	18.3692	18.2125	NA	18.4222	NA	18.2016	18.4194	18.0808	18.2948	17.9144	NA	18.0465	18.0765	17.9623	17.8535	18.2622	17.8669	17.5055	NA	18.0805	18.555	18.1837	17.3151	17.5394	18.0153	NA	17.5639	18.0482	18.3906	18.3625	18.3796	17.8503	NA	17.4896	18.2205	18.3351
BGH3_HUMAN	VLTPPMGTVMDVLK	16.91	-0.542	-1.86	0.07076	3.46	0.07076	17.2894	16.7522	16.9364	16.7548	16.6575	15.8127	16.5322	16.6284	16.2689	15.8163	15.7572	16.2429	NA	NA	16.5189	16.4649	16.4697	16.202	17.7801	17.6896	17.4271	17.5404	17.6965	17.9589	17.2579	17.062	15.1955	NA	17.0648	17.1552	16.886	16.6175	17.6254	17.4849	17.6365	17.2437	16.5524	16.7596	17.9531	17.9803
BGH3_HUMAN	YLYHGQTLETLGGK	16.81	-0.266	-1.07	0.29412	1.15	0.29412	NA	16.489	NA	16.3144	NA	16.8774	16.9298	17.1911	NA	16.1937	16.6013	16.4598	NA	16.1065	NA	NA	NA	17.1228	17.1396	17.5886	NA	17.0208	NA	17.4225	NA	NA	NA	NA	16.1411	16.4329	NA	16.7258	16.6712	17.2037	NA	16.9911	NA	16.8378	NA	17.412
BRWD3_HUMAN	NDQNTSVSHAR	19.7	0.477	1.64	0.10902	2.68	0.10902	18.1268	18.7917	19.1118	19.4002	20.7845	20.7859	20.163	20.1066	20.3847	20.2892	19.1712	19.5358	20.267	20.654	20.4811	20.3348	19.9057	19.945	20.1532	20.3763	19.4299	19.8018	20.101	20.0617	19.1742	19.2829	18.2158	18.8537	19.5922	19.6741	19.4	19.8845	19.7209	20.3855	18.8294	19.347	19.8852	19.9355	18.4504	19.1934
BTD_HUMAN	SHLIIAQVAK	18.54	0.003	0.01	0.99023	0	0.99023	18.0887	17.964	19.3022	19.1006	18.2304	NA	18.9321	18.2228	18.5776	NA	NA	NA	NA	NA	NA	NA	18.4258	18.097	NA	18.7132	NA	NA	NA	17.8961	18.7576	18.6294	NA	NA	NA	18.7132	NA	NA	18.5228	NA	18.8817	18.85	18.3208	NA	NA	NA
BTD_HUMAN	ILSGDPYCEK	18.81	0.165	0.9	0.37504	0.8	0.37504	18.193	18.6269	19.3921	19.5362	18.6646	18.7068	19.0411	18.6277	19.1171	19.203	18.8933	18.9732	18.6436	18.9325	18.5845	18.4703	18.8436	18.9722	19.0842	19.2772	18.7363	18.8801	18.8058	18.2677	18.8085	19.0516	18.3353	18.499	18.8073	18.8543	18.3155	18.7873	18.8726	19.0058	19.1536	19.3386	18.8847	18.5757	18.2773	18.2212
BTD_HUMAN	GDMFLVANLGTK	19.14	NA	NA	NA	NA	NA	NA	NA	19.0783	19.2042	NA	NA	NA	NA	NA	NA	NA	NA	NA	NA	NA	NA	NA	NA	NA	NA	NA	NA	NA	NA	NA	NA	NA	NA	NA	NA	NA	NA	NA	NA	NA	NA	NA	NA	NA	NA
BTD_HUMAN	LSSGLVTAALYGR	20.74	0.077	0.22	0.82938	0.05	0.82938	20.4892	NA	NA	NA	NA	NA	20.7134	20.8472	NA	NA	NA	20.6893	NA	20.438	NA	NA	21.1584	21.2348	NA	NA	NA	NA	NA	NA	NA	NA	20.5926	20.2688	NA	NA	NA	NA	NA	NA	20.9273	20.8114	NA	NA	NA	NA
BTD_HUMAN	VDLITFDTPFAGR	19.43	0.242	1.28	0.20832	1.63	0.20832	18.992	19.1921	20.4512	20.5838	19.0419	19.1862	19.3709	19.4456	19.8335	19.9657	19.64	19.8927	19.789	19.7934	19.2529	19.2924	19.0098	18.9763	19.5648	19.7472	18.9274	18.9242	19.2009	19.5854	19.2176	19.4518	18.9242	19.2111	19.5882	19.7712	18.9271	19.3172	19.7594	19.7311	20.0569	19.8371	19.1161	19.2493	18.4884	18.8935
BTD_HUMAN	TSIYPFLDFMPSPQVVR	20.27	-0.149	-0.43	0.66936	0.19	0.66936	19.804	19.7573	21.5034	21.6256	NA	NA	19.483	20.2919	20.7334	NA	20.9933	21.0065	20.3494	20.3579	19.9592	NA	17.5649	NA	20.405	20.3299	19.7564	NA	20.184	NA	20.3573	20.4112	20.5294	20.7512	20.6909	NA	20.2083	20.1917	20.7617	NA	21.1198	NA	19.8061	NA	19.2137	19.8047
BTD_HUMAN	QEALELMNQNLDIYEQQVMTAAQK	18.84	-0.084	-0.34	0.73782	0.11	0.73782	18.5658	18.5168	19.9691	20.213	17.3007	17.7351	18.5612	18.7654	19.3101	19.4182	19.4559	19.4691	18.6828	18.7055	18.8183	NA	17.3701	NA	19.0763	NA	18.5899	18.2462	18.4593	18.4434	18.6469	18.212	19.1064	19.0623	19.2874	19.2012	18.4923	18.6984	19.561	19.3616	19.5025	19.3299	18.7909	NA	18.4855	18.7597
C163A_HUMAN	LVGGDIPCSGR	16.85	0.137	0.51	0.60991	0.26	0.60991	16.2645	15.9224	17.4015	17.6774	17.0415	16.904	16.956	16.4917	16.9675	17.151	NA	16.5822	NA	17.3217	16.7498	17.249	16.9866	16.9976	16.9212	17.0653	16.6293	16.6148	17.8826	17.4806	16.9869	17.1118	15.2494	16.3565	NA	17.1473	NA	16.7466	NA	17.0038	16.81	16.7775	16.5961	16.8925	16.6049	16.0918
C163A_HUMAN	QLGCPTAVTAIGR	17.13	0.3	0.64	0.53053	0.42	0.53053	NA	NA	NA	17.8962	NA	NA	NA	NA	NA	17.2588	NA	NA	NA	17.4733	17.1439	NA	NA	NA	16.7297	NA	16.9157	NA	17.8775	NA	NA	17.421	15.0316	NA	17.6367	NA	NA	NA	16.9202	17.298	NA	NA	NA	NA	NA	NA
C163A_HUMAN	GPDTLWQCPSSPWEK	17.68	-0.376	-0.32	0.76055	0.1	0.76055	18.2167	17.2888	NA	NA	NA	NA	NA	NA	NA	NA	NA	NA	NA	NA	NA	17.5565	NA	NA	NA	17.15	NA	NA	17.9268	NA	NA	NA	NA	NA	NA	NA	NA	NA	NA	NA	NA	NA	NA	NA	18.6613	16.9692
C1QA_HUMAN	SLGFCDTTNK	20.17	-0.204	-0.87	0.38722	0.76	0.38722	19.8455	20.1626	19.7255	19.9473	20.0102	20.0052	20.1573	19.5038	20.3769	20.348	20.1284	20.2915	19.8778	20.1359	20.107	20.0046	19.9492	20.1796	20.1406	20.4052	19.9483	20.0567	21.2726	20.7503	19.7445	20.0706	19.7055	19.8025	19.6894	19.9078	21.6909	22.13	19.7105	20.0107	19.9194	20.1118	20.4689	20.0029	20.1789	20.2181
C1QA_HUMAN	GHIYQGSEADSVFSGFLIFPSA	15.66	-2.132	-1.8	0.11551	3.23	0.11551	NA	12.9393	NA	NA	NA	NA	NA	NA	NA	NA	15.0606	NA	NA	NA	NA	NA	NA	NA	NA	NA	NA	NA	16.6514	NA	NA	NA	NA	NA	NA	NA	17.9139	17.436	13.9474	NA	NA	NA	NA	NA	NA	NA
C1QA_HUMAN	KGHIYQGSEADSVFSGFLIFPSA	21.39	NA	NA	NA	NA	NA	NA	NA	NA	NA	NA	NA	NA	NA	NA	NA	NA	NA	NA	NA	NA	NA	NA	NA	NA	NA	NA	NA	NA	NA	NA	NA	NA	NA	NA	NA	21.4875	21.2992	NA	NA	NA	NA	NA	NA	NA	NA
C1QA_HUMAN	GLFQVVSGGMVLQLQQGDQVWVEKDPK	16.62	-0.55	-0.99	0.33807	0.98	0.33807	NA	NA	16.6226	NA	NA	NA	NA	NA	16.0392	15.5038	16.3525	NA	15.6433	NA	16.7299	NA	NA	NA	NA	NA	NA	NA	17.4559	NA	NA	NA	16.7163	NA	15.2159	NA	18.9891	18.5344	NA	NA	NA	NA	16.2629	NA	16.0301	NA
C1QB_HUMAN	TINVPLRR	19.11	-0.372	-1.72	0.09381	2.94	0.09381	19.1695	19.3448	18.7664	18.6754	18.6294	18.4477	19.2251	18.7255	18.8146	18.9953	19.3319	19.2231	19.1885	19.1722	18.7872	18.9469	18.635	18.554	19.1246	18.82	19.1009	18.9555	20.0166	19.245	19.2309	19.3413	18.9169	18.8675	19.0173	18.976	20.8921	20.997	18.4817	18.7127	19.2397	19.1125	19.1085	19.1512	19.5085	19.1476
C1QB_HUMAN	GNLCVNLMR	20.03	-0.421	-2.34	0.02396	5.5	0.02396	19.9257	19.8793	19.7403	19.7776	19.3303	19.262	19.9515	19.7558	20.0599	20.0343	20.1609	20.2378	19.8445	19.893	20.0574	19.889	19.4089	19.1916	19.9224	19.9669	19.9792	19.994	21.1397	21.1056	19.8403	19.8075	20.0623	19.8489	19.9637	19.8894	21.7545	21.7387	19.8223	19.7474	19.9558	19.8741	20.0954	19.8781	20.1508	20.0669
C1QB_HUMAN	LEQGENVFLQATDK	19.86	-0.252	-1.29	0.20278	1.68	0.20278	19.8663	20.1865	19.3658	19.3588	19.3552	19.5947	19.7745	19.8868	19.8813	19.8899	19.9468	20.1758	19.5214	19.7424	19.4596	19.4372	19.5881	19.7229	19.9267	19.9574	19.5626	19.7235	20.7886	20.9104	19.5865	19.6135	19.9801	19.8898	19.4632	19.4965	21.5802	21.7146	19.2668	19.5209	19.5947	19.6933	19.6693	19.5839	19.9996	20.0389
C1QB_HUMAN	VPGLYYFTYHASSR	20.99	-0.508	-2.4	0.02111	5.78	0.02111	20.8298	20.7958	20.7589	20.8627	20.3494	20.1217	21.0521	21.194	21.0576	20.8764	21.3588	20.9162	20.865	20.8387	20.7288	20.7804	19.4911	NA	20.8371	20.6531	20.7612	20.9367	21.8821	21.8952	20.6608	20.683	20.9474	20.9304	21.04	20.9871	22.9027	22.8341	20.6583	20.6337	21.2454	21.1741	20.9545	20.9112	21.0654	NA
C1QB_HUMAN	FDHVITNMNNNYEPR	20	-0.301	-1.37	0.17824	1.88	0.17824	20.1011	19.9725	19.5097	19.8651	18.9997	18.9667	20.0853	20.0782	20.2423	20.0525	20.3211	20.5044	19.8481	19.8766	19.8229	19.7493	19.3478	19.173	20.1979	20.2334	19.6824	19.7584	20.9224	21.0874	19.4971	19.6167	19.8954	20.1396	19.9429	19.7833	21.9224	21.9715	19.6423	19.6592	20.0533	19.586	19.8877	19.8205	20.1011	20.0036
C1QB_HUMAN	VVTFCDYAYNTFQVTTGGMVLK	16.12	-0.37	-0.45	0.65844	0.2	0.65844	15.7632	14.4882	16.7724	15.6542	NA	NA	15.945	13.9659	16.1759	NA	17.3788	16.2068	16.4689	15.2702	16.8931	15.033	NA	NA	15.7885	NA	15.1443	NA	18.1664	16.043	15.0437	NA	17.4298	16.1583	16.5221	15.4751	19.3351	18.4227	16.3949	14.2556	15.8684	15.2369	16.597	15.8344	16.238	15.8787
C1QC_HUMAN	FQSVFTVTR	21.1	-0.404	-2.32	0.02533	5.39	0.02533	21.0038	21.0877	20.6777	20.6099	20.6122	20.6228	20.8694	20.9865	21.1063	21.1439	21.3095	21.0225	21.0783	21.1273	20.8434	20.878	20.4966	20.5799	20.9848	20.8468	20.9006	20.9903	21.9683	22.1381	20.9027	21.1178	20.8711	20.7704	21.0568	21.0768	22.8675	22.8386	20.8566	20.7945	21.0717	21.0638	21.2134	21.0901	21.159	21.2288
C1QC_HUMAN	VVTFCGHTSK	16.17	-0.286	-0.63	0.5326	0.4	0.5326	16.6076	16.452	15.2802	14.4459	16.1749	15.5587	16.4687	16.3755	16.218	15.8112	15.9624	16.299	16.033	16.0562	15.4456	17.1449	15.7829	15.5794	16.4504	NA	16.3239	NA	17.6635	17.9066	16.1281	NA	16.5242	16.212	15.3816	14.6804	18.5107	18.3043	NA	14.9512	15.3982	14.6741	NA	16.6944	NA	NA
C1QC_HUMAN	TNQVNSGGVLLR	20.11	-0.21	-0.99	0.32985	0.97	0.32985	19.718	20.0427	19.8695	19.9926	19.8077	19.9492	20.3724	19.8853	20.1717	20.2659	20.1943	20.2997	19.8075	20.0072	19.9552	19.7291	19.6888	19.8701	20.153	20.227	19.6737	19.7052	21.0907	20.8897	19.6581	19.9736	19.6496	19.4614	20.121	20.1703	21.5192	21.9364	19.7455	19.8342	20.2085	20.2741	20.4317	19.8563	19.9959	20.0062
C1QC_HUMAN	QTHQPPAPNSLIR	19.64	-0.309	-1.38	0.17552	1.9	0.17552	19.3377	19.5497	19.0437	19.3139	19.13	19.027	20.1964	19.609	19.7492	19.7999	19.9918	19.7799	19.4339	19.5512	19.17	19.1164	19.4091	19.2258	19.5206	19.7452	19.1231	19.1749	20.6314	20.0416	19.4942	19.6002	19.6378	19.7117	19.2476	19.4146	21.4066	21.6695	19.1776	19.3894	19.9396	19.8552	19.7975	19.6321	19.5822	19.3443
C1QC_HUMAN	FNAVLTNPQGDYDTSTGK	20.69	-0.218	-1.16	0.25345	1.34	0.25345	20.6407	20.7771	20.3154	20.5442	20.2641	20.2669	20.9175	20.7918	20.7895	20.9094	20.7381	20.9238	20.4261	20.64	20.4843	20.3494	20.1571	20.3083	20.6433	20.7028	20.1488	20.4541	21.4498	21.6662	20.2912	20.2552	20.6395	20.6449	20.4297	20.4485	22.4289	22.5066	20.2953	20.4886	20.6653	20.7079	20.5555	20.5865	20.6037	20.6926
C1QC_HUMAN	VPGLYYFVYHASHTANLCVLLYR	15.81	-0.744	-0.77	0.44904	0.6	0.44904	NA	17.7019	15.3607	15.3772	NA	16.9376	NA	NA	NA	NA	15.0854	14.7768	15.14	13.5169	NA	NA	15.6043	13.2054	NA	NA	NA	NA	16.1319	16.354	15.8066	NA	NA	15.2762	NA	NA	18.4636	18.5253	NA	NA	15.5731	NA	NA	NA	NA	NA
C1R_HUMAN	NIGEFCGK	17.12	-0.1	-0.27	0.7893	0.07	0.7893	16.3954	16.8167	15.567	15.7496	17.2887	18.5647	17.2728	17.0638	16.9625	17.1015	16.8728	16.877	16.3816	16.9684	17.2111	17.1144	17.6608	18.6753	17.2684	17.6083	16.6586	16.8961	18.3943	18.2256	16.4128	16.651	15.8852	16.7816	16.945	16.9061	18.8009	19.2564	16.9914	17.1274	16.3833	16.3681	17.1866	16.6337	17.6006	17.3064
C1R_HUMAN	VSVHPDYR	17.6	-0.25	-1.03	0.3101	1.06	0.3101	NA	17.1314	17.4477	16.6834	17.0355	NA	17.6271	17.5672	17.4172	NA	17.4109	17.8501	17.3475	17.0889	NA	17.8792	17.6898	NA	17.9389	NA	16.9665	17.411	18.168	18.1522	17.0594	NA	17.7016	NA	17.6448	NA	19.1888	18.9818	17.3736	17.426	17.2161	17.1859	NA	17.6117	17.9228	18.0061
C1R_HUMAN	VLNYVDWIK	20.93	-0.309	-1.85	0.07312	3.41	0.07312	21.2592	20.9019	20.6984	NA	20.5059	NA	21.0701	21.1494	20.6206	NA	21.0578	20.9715	20.702	20.588	20.7693	20.9179	NA	20.3278	20.6845	20.4591	20.7275	20.6779	21.2954	21.0386	20.7544	20.6902	20.3847	20.5885	21.1613	21.1494	21.9062	21.9284	21.2876	NA	20.7598	20.8455	20.7101	21.0362	21.3792	21.5733
C1R_HUMAN	YTTTMGVNTYK	19.02	-0.257	-1.17	0.25037	1.36	0.25037	18.6953	19.1064	18.82	19.1228	18.5156	18.6727	19.0361	18.2821	19.0067	19.0375	18.7686	18.9651	18.6589	18.7324	18.6394	18.913	19.0138	19.0305	19.2571	19.4939	18.7491	18.8285	19.7988	19.1351	18.6223	18.6233	18.5448	18.3293	19.2169	19.3736	20.2077	20.5179	18.924	19.0962	18.7928	18.9097	18.8476	19.0409	19.6989	19.6549
C1R_HUMAN	FCGQLGSPLGNPPGK	21.04	-0.162	-0.91	0.36997	0.82	0.36997	20.2472	20.4336	21.7478	21.7384	21.0746	21.0593	21.5157	21.545	20.929	20.9525	21.3301	21.4655	20.8025	20.7933	20.2845	20.245	20.182	20.3502	21.2193	21.2081	21.3086	21.3668	21.0498	21.0546	21.1237	21.0357	21.3937	21.3599	21.296	21.1915	21.3145	21.29	21.2051	21.2422	21.0536	20.9719	21.1508	20.3492	20.8073	20.8005
C1R_HUMAN	IQYYCHEPYYK	18.58	-0.315	-1.35	0.18578	1.81	0.18578	18.4002	18.4074	17.837	17.7738	18.0314	17.6118	18.9206	18.7999	18.6461	18.5296	18.9045	18.7807	18.2634	18.2604	18.4316	18.7514	18.3168	17.8919	18.7776	19.0844	18.1625	17.9239	19.3508	18.8046	17.8166	17.9718	18.3056	18.4052	18.5511	18.5784	20.4707	20.5775	18.621	18.6591	18.2902	18.3306	18.6203	18.7155	19.3864	19.1719
C1R_HUMAN	QDACQGDSGGVFAVR	18.8	-0.185	-0.85	0.39888	0.73	0.39888	18.7202	18.849	17.8298	NA	18.3419	18.5193	18.9093	19.0561	18.9135	18.7341	18.4899	18.7752	18.341	18.5792	18.7084	18.6523	18.8235	19.0224	19.1344	19.1322	18.3333	18.6088	19.6045	19.5997	18.1899	18.2693	NA	18.2808	18.5117	18.7144	20.4362	20.6041	18.6071	18.8499	18.135	18.2662	18.4969	18.4988	19.4692	19.343
C1R_HUMAN	LPVANPQACENWLR	21.09	-0.316	-1.89	0.06553	3.58	0.06553	21.501	21.1726	21.5057	21.3835	20.3917	20.2921	21.1944	21.2066	21.0668	20.9364	21.0456	20.8702	20.7459	20.8497	20.6235	20.7903	20.6674	20.397	21.0063	21.0778	21.2003	21.2458	21.4678	21.4081	21.2401	20.93	20.5741	20.2236	21.1075	20.9391	21.9879	21.9157	21.1367	21.2812	21.3651	21.3434	21.082	21.1027	21.792	21.6984
C1R_HUMAN	CLPVCGKPVNPVEQR	17.32	-0.05	-0.11	0.91049	0.01	0.91049	NA	17.7935	NA	NA	NA	NA	17.9162	16.7154	17.0968	NA	16.6487	17.0709	NA	NA	17.1328	NA	17.4631	16.8754	17.3994	NA	NA	16.0043	NA	16.8194	NA	NA	NA	NA	17.3897	NA	18.0601	18.7824	17.1345	NA	NA	NA	17.6145	NA	17.6499	17.5239
C1R_HUMAN	MGNFPWQVFTNIHGR	20.09	-0.805	-2.28	0.02773	5.22	0.02773	19.7685	19.8215	20.4438	20.3111	18.8849	18.4735	20.1093	20.0357	20.0012	20.0449	20.6222	20.396	20.1331	19.8115	20.3182	20.6017	15.9339	NA	19.9353	19.8429	19.8772	19.3923	20.6651	20.5486	19.7998	19.1802	20.2779	20.3728	20.7091	20.5589	21.4823	21.4577	20.6274	20.4651	20.6913	20.3027	20.0358	20.4434	20.4764	20.7077
C1R_HUMAN	ESEQGVYTCTAQGIWK	19.55	-0.263	-1.32	0.19485	1.74	0.19485	19.6117	19.6665	18.9275	19.2344	18.7938	18.7395	19.9142	20.0043	19.1674	19.2902	19.7377	19.7926	19.256	19.3669	19.2906	19.5726	19.3621	19.0796	19.7759	19.7373	19.0909	18.992	20.2927	20.2938	19.1176	18.9164	19.3398	19.3211	19.4464	19.267	21.1538	21.1435	19.2884	19.6203	19.2092	19.3086	19.5689	19.6068	20.297	20.3138
C1R_HUMAN	MDVFSQNMFCAGHPSLK	20.37	-0.296	-1.6	0.11654	2.57	0.11654	20.5988	20.4377	20.3113	20.3359	19.3567	19.2591	20.2819	20.6553	20.329	20.1873	20.5755	20.3911	20.292	20.1375	20.2386	20.3523	19.6856	19.545	20.6847	20.8027	20.3154	20.2971	20.8514	20.8081	19.8891	19.9076	20.1642	20.2444	20.5552	20.5977	21.5803	21.4155	20.5324	20.576	20.4401	20.2335	19.8881	20.1914	21.1543	20.7271
C1R_HUMAN	GFLAYYQAVDLDECASR	16.9	-0.355	-0.4	0.69313	0.16	0.69313	16.0788	15.7037	NA	NA	NA	NA	16.9598	NA	NA	NA	NA	NA	NA	NA	16.8009	NA	NA	NA	16.9103	NA	NA	NA	NA	NA	15.8322	NA	NA	NA	NA	NA	18.465	17.6565	16.2969	NA	NA	NA	NA	NA	18.4918	16.7031
C1R_HUMAN	TLDEFTIIQNLQPQYQFR	20.96	-0.562	-1.87	0.06931	3.48	0.06931	20.5083	21.1411	20.3671	20.7078	19.8512	20.236	20.83	21.0191	21.0347	21.1496	21.3661	21.5077	21.0278	20.7739	20.8363	21.1574	19.5685	18.5703	20.9882	20.8605	20.5981	20.4698	21.4082	21.8402	20.2694	20.7481	20.9214	21.1294	20.9589	21.078	22.4374	22.6069	21.396	21.3501	21.1025	20.9749	20.539	21.2784	21.6002	22.0312
C1R_HUMAN	LVFQQFDLEPSEGCFYDYVK	19.23	-0.74	-1.9	0.06583	3.61	0.06583	NA	18.8093	18.8592	19.1313	NA	16.5601	NA	19.1702	19.3206	19.594	19.9382	19.8561	19.4742	18.8758	18.998	19.4731	16.5028	NA	19.024	18.6477	18.5321	NA	19.3391	19.3215	NA	18.0576	19.1453	19.548	19.3595	19.4834	20.797	20.935	19.8238	19.8357	19.3569	19.0196	18.8691	19.7095	19.91	20.6685
C1R_HUMAN	QRPPDLDTSSNAVDLLFFTDESGDSR	18.35	-0.351	-1.43	0.16161	2.03	0.16161	18.8268	18.7849	17.7762	17.9499	17.4784	17.6915	18.6252	18.6214	18.2331	18.3359	18.6494	18.5942	18.2278	17.8701	18.2833	18.0197	17.7274	17.084	18.6226	18.1852	17.8507	17.6834	19.0807	18.7692	18.087	17.6592	18.0063	18.026	18.1024	18.0976	20.1888	20.0895	18.8879	18.6549	18.3104	18.1577	18.4961	18.2415	18.9333	19.2785
C1R_HUMAN	QGYQLIEGNQVLHSFTAVCQDDGTWHR	19.46	-0.355	-1.58	0.12318	2.49	0.12318	19.8909	19.5014	18.6302	18.8835	18.7113	18.6778	19.9777	19.7473	19.0566	19.2763	19.5433	19.6229	19.0916	18.8048	19.2075	19.4417	NA	NA	19.4098	NA	19.1868	18.9244	20.0145	19.8481	19.2802	NA	19.1448	19.3959	19.4189	19.4383	21.1612	20.8939	19.526	19.6241	19.1884	19.1132	19.3257	19.4566	20.3643	19.858
C1R_HUMAN	LFGEVTSPLFPKPYPNNFETTTVITVPTGYR	18.85	-0.358	-1.14	0.26057	1.31	0.26057	19.2416	18.2315	19.1413	19.2087	NA	NA	18.3083	18.1544	18.5054	18.7458	19.176	19.0508	18.5785	18.2036	18.7137	18.4742	NA	NA	18.2912	18.3927	17.9903	17.6694	18.8328	19.0462	17.9963	17.6072	19.0748	19.3158	19.532	19.1694	20.6511	20.5479	19.0241	18.6149	19.0799	18.7722	18.6822	19.3994	19.5049	19.6776
C1RL_HUMAN	GSEAINAPGDNPAK	12.19	-0.455	-0.49	0.65556	0.24	0.65556	NA	NA	NA	NA	NA	NA	NA	NA	NA	NA	NA	NA	NA	NA	NA	NA	NA	11.9585	NA	NA	NA	NA	NA	NA	NA	NA	12.414	NA	NA	NA	NA	NA	NA	NA	NA	NA	NA	NA	NA	NA
C1RL_HUMAN	WILTAAHTIYPK	21.08	-0.44	-2.28	0.02778	5.21	0.02778	21.4551	21.0213	20.9713	20.8303	20.2857	20.1116	21.2297	21.1173	20.8792	20.7907	21.5009	21.201	20.9234	20.7585	20.995	21.0123	20.3347	19.9537	20.9118	20.9261	20.8977	20.8398	21.7676	21.6426	20.8539	20.6153	20.7462	20.6421	21.3259	21.2779	22.5856	22.3745	21.1784	21.0797	21.2086	21.067	21.2874	21.0839	21.7769	21.7563
C1RL_HUMAN	LGNFPWQAFTSIHGR	17.23	-0.561	-1.45	0.16475	2.1	0.16475	NA	NA	16.7649	NA	NA	NA	NA	NA	16.1557	16.1717	17.7686	17.3377	17.4838	17.0544	NA	17.0071	NA	NA	NA	NA	NA	NA	NA	NA	NA	NA	18.6224	NA	NA	17.3122	17.9218	18.1196	16.9305	16.3932	NA	NA	17.1431	17.4837	NA	17.203
C1S_HUMAN	SDFSNEER	15.32	NA	NA	NA	NA	NA	NA	NA	NA	NA	NA	NA	NA	NA	NA	NA	NA	NA	NA	NA	NA	NA	NA	NA	NA	NA	NA	NA	NA	NA	NA	NA	13.4858	NA	NA	NA	16.0931	16.3758	NA	NA	NA	NA	NA	NA	NA	NA
C1S_HUMAN	IIGGSDADIK	20.33	-0.195	-1.08	0.28727	1.16	0.28727	19.8045	20.4279	19.8692	19.888	20.1173	20.3033	20.4696	20.2324	20.0769	20.2597	20.2394	20.1523	20.1579	20.1702	20.2269	20.0987	20.5486	20.6149	20.5276	20.4957	19.8817	19.88	20.8364	20.828	19.9468	20.327	NA	20.1622	20.4124	20.3661	21.1869	21.3472	20.2495	20.2725	20.1587	20.1389	20.6559	20.0648	20.7805	20.8767
C1S_HUMAN	CVPVCGVPR	17.71	-0.175	-0.74	0.46185	0.55	0.46185	17.8051	18.1668	16.7506	16.7412	17.8514	17.7857	17.8897	17.8205	16.9823	17.1194	17.4677	17.2388	17.1867	17.305	17.4948	17.994	18.3241	18.4244	18.0049	18.2407	17.2369	17.2916	18.4999	18.4773	NA	NA	16.7233	16.864	17.5974	17.5045	18.813	19.0255	17.5216	17.6313	17.4195	17.1833	17.815	17.7168	18.7994	18.3709
C1S_HUMAN	NYVDWIMK	20.22	-0.318	-1.54	0.1313	2.37	0.1313	20.4949	20.2127	20.0482	19.8897	19.607	19.0006	20.1611	20.1393	19.8478	19.6646	20.5206	20.2378	20.3811	20.1329	20.4014	20.4493	19.825	19.2154	20.5515	20.4186	20.0894	19.9517	20.6541	20.5395	20.1746	19.7724	20.1297	20.0581	20.2833	20.3331	21.4389	21.3804	20.3029	20.2204	20.1096	19.9197	20.2104	20.3152	20.9499	20.7307
C1S_HUMAN	YHGDPMPCPK	17.25	-0.231	-0.82	0.41454	0.68	0.41454	17.4685	16.837	17.1692	16.7448	16.0472	15.1529	17.4195	17.476	17.0057	16.7286	17.3096	17.5552	17.2093	16.8948	17.6271	17.5721	17.5625	17.1004	18.0289	17.8538	16.8815	16.8452	18.1404	17.9277	17.1471	16.6128	16.6858	17.0955	17.3171	17.2637	18.7437	18.5087	17.3671	17.0496	16.9432	16.8171	17.092	17.292	17.8643	17.7846
C1S_HUMAN	TNFDNDIALVR	21.6	-0.157	-1	0.322	1	0.322	21.7449	21.9013	21.1118	21.2154	21.2299	21.2159	21.4925	21.7237	21.5412	21.4923	21.5757	21.7912	21.388	21.6784	21.3407	21.4023	21.4966	21.7725	21.6341	21.6974	21.2011	21.403	21.7251	22.0555	21.4544	21.6141	21.4863	21.1378	21.6606	21.6239	22.4945	22.5679	21.294	21.4825	21.438	21.4511	21.6266	21.6448	22.0518	22.1747
C1S_HUMAN	EDTPNSVWEPAK	21.02	NA	NA	NA	NA	NA	NA	NA	NA	NA	NA	NA	NA	NA	NA	NA	NA	NA	NA	NA	NA	NA	NA	NA	NA	NA	NA	NA	NA	NA	NA	NA	NA	NA	NA	NA	NA	NA	NA	NA	NA	NA	NA	NA	NA	21.0151
C1S_HUMAN	GDSGGAFAVQDPNDK	19.54	0.006	0.03	0.97449	0	0.97449	19.4031	19.6175	18.7094	19.1489	19.2137	19.2122	19.8356	19.7583	19.6019	19.511	19.3753	19.6777	19.3345	19.5941	19.6043	19.3442	19.7642	19.9106	20.0318	20.1386	19.0307	19.3084	20.0633	19.7606	18.8886	18.9461	19.0716	19.5015	19.3565	19.5412	20.6047	20.8099	19.1994	19.4659	18.93	19.2485	19.6426	19.4415	19.8385	20.0077
C1S_HUMAN	VEDPESTLFGSVIR	20.13	-0.168	-0.97	0.33769	0.94	0.33769	20.7716	20.5725	19.5544	19.77	19.7752	19.8201	20.0665	20.345	19.9065	19.9479	20.0887	20.1275	19.911	19.7051	19.832	19.9449	20.0577	20.2064	20.2211	20.2335	19.8588	20.096	20.2353	20.3957	20.0282	20.2285	19.6485	19.7262	20.2585	20.1426	21.3686	21.171	19.8917	19.8817	19.7811	19.6465	19.8894	20.0491	21.1259	20.8036
C1S_HUMAN	VGATSFYSTCQSNGK	20.14	-0.069	-0.38	0.70427	0.15	0.70427	20.1472	20.2942	19.5998	19.7757	19.7771	19.7889	20.413	20.065	20.0452	20.0987	20.0156	20.2066	20.0394	20.1876	20.0385	20.0434	20.4	20.3006	20.4808	20.4789	19.7436	19.6164	20.5883	20.1245	20.0372	20.1119	19.302	19.5503	20.142	20.2278	21.0048	21.3894	19.9522	20.0947	19.751	19.9412	20.1443	20.0982	20.8352	20.9116
C1S_HUMAN	MLTPEHVFIHPGWK	19.94	-0.045	-0.16	0.8755	0.03	0.8755	20.2904	19.6015	20.0699	NA	NA	NA	19.7079	20.2182	NA	NA	NA	NA	19.7067	NA	NA	19.5883	NA	NA	19.962	19.8303	19.3939	NA	19.6186	19.8484	19.6122	NA	NA	NA	20.0562	NA	20.8629	20.5131	19.473	NA	NA	NA	NA	20.0124	20.1872	20.2761
C1S_HUMAN	SNALDIIFQTDLTGQK	19.96	-0.341	-1.1	0.27758	1.21	0.27758	20.3594	20.4772	19.4964	18.9146	19.3475	19.3979	20.4324	19.9762	19.859	20.0159	20.0795	19.5882	19.8459	19.6991	20.2008	19.6983	19.4289	18.3193	20.6473	20.0509	20.0041	19.3288	20.839	20.1764	19.8027	19.8734	19.9129	19.5977	20.0812	19.9522	21.1861	21.0034	20.4779	20.1778	19.3693	18.963	19.8979	19.721	21.133	21.1536
C1S_HUMAN	SNALDIIFQTDLTGQKK	16.34	-0.445	-1.09	0.29083	1.18	0.29083	15.7255	16.8026	NA	NA	15.6833	15.9016	16.5262	16.5943	NA	16.3338	NA	15.5174	NA	15.7153	NA	NA	NA	NA	16.2982	NA	NA	NA	NA	16.2743	NA	NA	15.4303	NA	NA	NA	17.5018	17.738	NA	NA	16.5038	16.5235	NA	NA	NA	16.6661
C1S_HUMAN	QFGPYCGHGFPGPLNIETK	20.91	-0.135	-0.9	0.37447	0.81	0.37447	21.3303	21.1571	20.7444	20.98	20.3005	20.1799	21.0536	21.1508	20.8635	20.8983	21.155	21.1035	20.8319	20.7177	20.8268	20.8029	20.3591	20.1773	21.115	21.0932	20.5631	20.511	20.9569	20.9499	20.7615	20.6365	20.7457	20.7222	20.9128	20.8925	21.7441	21.6855	20.896	20.9092	21.2457	21.0641	20.9434	20.8355	21.5118	21.0541
C1S_HUMAN	SSNNPHSPIVEEFQVPYNK	21.84	-0.12	-0.86	0.3956	0.74	0.3956	22.0426	21.9504	21.3871	21.5059	21.3549	21.2778	22.0154	22.0948	21.7272	21.6828	21.9835	22.1457	21.5407	21.7305	21.587	21.6205	21.8421	21.8273	22.0754	22.1093	21.5322	21.6032	21.9709	22.1792	NA	21.5691	NA	NA	21.8126	21.8174	22.6473	22.6716	21.5468	21.6954	21.7319	21.6672	21.7974	21.7803	22.2026	22.2687
C1S_HUMAN	VEKPTADAEAYVFTPNMICAGGEK	19.36	-0.262	-1.33	0.19042	1.77	0.19042	19.7136	19.7745	19.1613	19.1317	18.2141	18.5476	19.5266	19.7737	19.2749	18.8444	19.4423	19.3054	19.3108	19.0851	19.037	19.2584	19.0729	18.7452	19.8194	19.5987	19.1108	19.2599	19.6032	19.6262	19.1163	19.0179	19.2336	19.5298	19.5522	19.6004	20.5893	20.3059	19.2484	19.1933	19.4582	19.2596	18.9392	19.2531	20.1799	19.806
C1S_HUMAN	MGPTVSPICLPGTSSDYNLMDGDLGLISGWGR	18.32	-0.176	-0.41	0.68629	0.17	0.68629	NA	NA	19.2989	18.9744	NA	NA	NA	17.6654	17.7454	17.11	18.6505	18.6309	18.1187	17.4641	18.1052	18.8975	NA	NA	17.406	18.0656	NA	NA	17.4957	18.1636	16.6297	NA	18.8726	19.4863	18.8411	18.8752	19.0272	19.2331	18.0503	18.5749	17.2989	NA	17.7825	18.1291	19.0805	19.7078
C99L2_HUMAN	DLEDIVGGGEYKPDK	18.51	0.537	2.23	0.03266	4.96	0.03266	18.5342	18.5301	19.2465	19.5659	18.477	18.8232	18.6632	18.7791	19.1092	19.12	18.2336	NA	18.272	18.6147	18.7305	NA	18.5482	18.8008	18.8549	NA	NA	18.6112	18.0145	NA	18.1264	18.0662	16.5227	NA	18.9782	18.6736	17.285	17.8995	18.7365	18.9059	18.1394	18.2366	18.9906	NA	18.2459	18.3626
C99L2_HUMAN	APAKPPGSGLDLADALDDQDDGR	16.37	-0.403	-0.58	0.58249	0.34	0.58249	16.1213	NA	NA	17.1479	NA	NA	15.8106	NA	NA	NA	NA	NA	NA	NA	NA	NA	NA	NA	NA	16.0766	NA	NA	NA	NA	NA	NA	NA	NA	NA	NA	NA	NA	NA	16.6925	NA	NA	NA	NA	NA	NA
CA2D1_HUMAN	LEETITQAR	18.09	0.436	0.96	0.36746	0.91	0.36746	NA	NA	18.1122	18.4016	NA	NA	NA	NA	NA	NA	NA	NA	NA	NA	NA	NA	NA	18.4565	NA	NA	NA	NA	NA	NA	NA	17.7708	NA	NA	NA	NA	NA	NA	NA	NA	18.2603	NA	18.3411	NA	17.2949	NA
CA2D1_HUMAN	FVVTDGGITR	18.75	-0.138	-0.61	0.54655	0.37	0.54655	18.9245	18.8126	19.258	19.3288	18.4167	NA	18.5583	NA	18.9811	18.8335	18.3287	18.525	18.4218	18.4269	18.0226	NA	19.0119	19.1938	18.2798	NA	18.559	18.8367	18.345	18.6742	18.9116	18.9287	17.7564	17.5404	19.4512	19.2581	18.0368	18.0359	19.4101	19.2191	19.6324	19.138	19.477	18.7993	NA	18.7721
CA2D1_HUMAN	MQEDLVTLAK	19.13	0.471	0.95	0.35293	0.91	0.35293	NA	NA	19.4733	19.7537	NA	NA	NA	NA	19.4864	19.5976	19.2116	NA	NA	NA	NA	NA	NA	NA	NA	NA	NA	18.4526	NA	NA	NA	NA	NA	19.2758	19.6777	19.6041	16.455	16.5509	19.8061	19.8844	19.3538	19.3684	19.5957	19.6456	NA	19.223
CA2D1_HUMAN	GPIQWMACENK	17.88	-0.132	-0.53	0.59838	0.28	0.59838	18.3511	18.0972	19.0466	18.976	16.753	16.7401	NA	17.9042	18.1616	18.1278	17.2743	17.3425	17.5315	NA	17.2024	17.2599	18.1271	18.0999	17.8089	17.8986	17.9051	17.9059	17.6731	17.8104	17.696	17.8799	16.0599	16.4072	18.7514	18.8709	17.3412	16.9965	18.6746	18.5726	18.5886	18.7363	18.5496	18.2357	18.033	18.1224
CA2D1_HUMAN	SGPGAYESGIMVSK	21.47	-0.042	-0.19	0.85213	0.04	0.85213	21.2108	20.8483	20.2774	20.4518	21.8264	21.83	21.2697	21.4021	21.4886	21.3502	21.9058	21.8085	21.779	21.4994	21.1879	21.1686	22.0008	21.9775	21.9052	21.7769	22.1299	22.2148	21.9305	21.8234	21.8672	21.7759	22.6903	22.6216	20.5188	20.5311	22.3128	22.1292	20.6762	20.323	20.9576	21.0747	20.9288	20.8321	21.3084	21.159
CA2D1_HUMAN	YYPASPWVDNSR	17.36	-0.363	-1.45	0.15665	2.1	0.15665	17.2176	17.0093	18.3411	18.1739	16.4678	16.1564	NA	17.5492	17.6933	17.4135	16.6909	17.1423	NA	16.9575	16.8313	16.9378	17.4477	17.332	17.2222	16.9976	17.4371	16.7183	16.9631	16.9124	17.6277	NA	NA	NA	18.0719	18.1382	NA	NA	17.9697	18.0093	18.1959	18.0099	18.0163	17.9107	16.6461	16.82
CA2D1_HUMAN	IKPVFIEDANFGR	20.29	NA	NA	NA	NA	NA	NA	NA	NA	NA	NA	NA	NA	NA	NA	NA	NA	NA	NA	NA	NA	NA	NA	NA	NA	NA	NA	NA	NA	NA	NA	NA	NA	NA	NA	NA	NA	NA	NA	NA	20.2707	20.3182	NA	NA	NA	NA
CA2D1_HUMAN	TASGVNQLVDIYEK	19.29	0.047	0.23	0.82111	0.05	0.82111	19.5155	19.8327	19.9938	20.1622	18.9248	19.0166	19.2828	19.6095	19.5375	19.5812	18.7779	18.8124	18.8952	19.1938	18.612	18.8175	19.6838	19.791	19.0538	19.2328	19.1885	19.4485	18.683	19.1784	19.264	19.4543	18.0663	18.2814	19.8952	19.8763	18.4259	18.624	19.7004	19.8863	19.7821	19.9008	19.5345	19.5694	19.2606	19.3634
CA2D1_HUMAN	VFTFSVGQHNYDR	18.97	-0.213	-0.39	0.70949	0.16	0.70949	NA	NA	NA	NA	18.5702	NA	NA	NA	NA	NA	NA	NA	NA	NA	NA	NA	19.1555	NA	NA	NA	NA	18.9951	NA	NA	NA	NA	NA	NA	NA	NA	NA	NA	NA	NA	NA	NA	19.1564	NA	NA	NA
CA2D1_HUMAN	YQDLYTVEPNNAR	17.34	NA	NA	NA	NA	NA	NA	NA	NA	NA	NA	NA	NA	NA	NA	NA	NA	NA	NA	NA	NA	NA	NA	NA	NA	NA	NA	NA	NA	NA	NA	NA	NA	NA	NA	NA	NA	NA	NA	NA	NA	17.3441	NA	NA	NA	NA
CA2D1_HUMAN	TPNNPSCNADLINR	15.47	0.497	0.49	0.64331	0.24	0.64331	NA	NA	NA	NA	NA	NA	NA	NA	NA	NA	NA	NA	NA	NA	NA	NA	15.5064	15.9341	NA	NA	14.3094	NA	NA	NA	NA	NA	NA	NA	NA	NA	NA	NA	NA	NA	NA	16.1369	NA	NA	NA	NA
CA2D1_HUMAN	VLLDAGFTNELVQNYWSK	16.1	-0.031	-0.05	0.95859	0	0.95859	NA	15.6991	17.9527	17.8661	NA	NA	15.8163	14.4023	16.0347	16.035	16.4538	15.6047	15.5569	15.1563	15.6105	15.0548	NA	NA	NA	NA	NA	NA	NA	14.0736	15.2578	NA	14.7095	NA	17.1347	16.5589	NA	15.236	17.7192	16.7189	17.7853	16.6379	16.9357	16.9328	NA	15.7781
CA2D1_HUMAN	LLIQAEQTSDGPNPCDMVK	16.89	NA	NA	NA	NA	NA	NA	NA	NA	NA	NA	NA	NA	NA	NA	NA	NA	NA	NA	NA	NA	NA	NA	NA	NA	NA	NA	NA	NA	16.0102	NA	NA	NA	NA	16.5525	17.1771	NA	NA	NA	17.8339	NA	NA	NA	NA	NA	NA
CA2D1_HUMAN	SQEPVTLDFLDAELENDIK	18.11	-0.067	-0.18	0.86185	0.03	0.86185	17.9142	18.5324	19.23	19.535	16.8002	17.7739	18.0966	17.7767	18.3049	18.9933	18.0488	17.6332	18.1478	17.71	17.7046	17.8538	17.955	16.9761	18.3343	17.5146	18.3123	17.6395	17.4386	17.2831	17.841	18.5305	NA	16.4237	18.651	18.4627	17.2524	17.1256	19.4683	19.3199	19.2743	18.8333	18.6603	18.7669	17.8181	18.3981
CA2D1_HUMAN	INTQEYLDVLGRPMVLAGDK	19.17	-0.312	-1.38	0.17574	1.91	0.17574	NA	19.4483	19.9622	20.0741	18.4421	NA	19.1919	19.1653	19.3921	19.4201	18.7645	18.8333	18.7105	18.6255	18.5636	18.7274	18.6257	18.2092	18.875	18.9388	19.5635	19.3089	19.1944	18.8458	19.0635	19.1839	NA	18.2998	20.0575	20.0926	18.2427	18.3968	20.0593	19.9142	19.9679	19.8291	19.4513	19.5842	NA	NA
CA2D1_HUMAN	NREEDPSLLWQVFGSATGLAR	18.79	-0.282	-1.05	0.29842	1.11	0.29842	18.6148	18.4595	20.0545	20.1747	17.3702	17.1857	18.5132	18.8165	19.1968	18.7718	18.9538	18.876	18.6086	18.5461	18.3471	18.5651	NA	NA	18.523	18.0615	18.1778	18.2566	18.6814	18.2689	18.3808	18.6303	18.3247	18.345	19.7623	19.6585	18.2165	18.1157	19.7717	19.632	19.8076	19.736	19.5568	19.8832	18.6278	18.7294
CAB45_HUMAN	DLGGFDEDAEPR	18.33	0.216	0.97	0.33756	0.94	0.33756	18.6696	18.7069	17.3493	18.1279	18.6611	NA	18.2614	18.4927	18.5957	18.6157	17.7921	18.0603	18.1634	18.369	18.6032	18.5648	18.8309	19.1184	18.2492	18.6258	18.073	18.4484	18.1899	18.6496	18.3432	18.7245	NA	17.3373	18.2933	18.3207	18.0542	18.2287	18.1249	18.4377	18.2513	17.8031	18.2449	18.0673	18.5842	NA
CAD13_HUMAN	VNSDGGLVALR	20.35	0.104	0.4	0.69093	0.16	0.69093	20.5261	NA	21.1921	21.3591	20.0863	20.1409	20.0966	20.2385	20.7383	20.7724	19.8647	20.2076	20.0673	20.179	19.7026	19.8348	21.0034	21.3164	19.9127	NA	20.282	20.5946	19.8871	NA	20.04	20.2077	18.4128	18.4341	20.8033	21.0244	19.3837	19.5305	20.7523	20.9244	21.3101	21.4095	21.1428	20.9559	20.3086	NA
CAD13_HUMAN	YEVSSPYFK	20.44	-0.007	-0.03	0.97355	0	0.97355	20.4164	20.452	21.5607	21.5014	20.0203	19.8616	20.2274	20.3891	20.87	20.8317	20.1891	20.1358	20.294	20.4108	19.9412	19.9155	20.8989	20.9037	19.8181	20.0305	20.5099	20.6253	20.0543	20.208	20.3336	20.4005	18.9716	18.9154	21.0501	20.9911	19.6197	19.7241	20.9466	20.9851	21.3965	21.4847	21.0699	21.1179	20.1583	20.2479
CAD13_HUMAN	DIQGSLQDIFK	21.26	0.049	0.2	0.84289	0.04	0.84289	21.2313	21.6896	21.9311	22.2991	20.9343	21.1301	21.2202	21.2584	21.6636	21.7902	20.9282	21.1523	21.187	21.3391	20.5204	20.7877	21.5818	21.4802	20.7263	20.8567	21.5186	21.2327	20.7045	20.7251	21.3012	21.3089	19.4646	20.0122	21.8186	21.9947	20.1173	20.5148	21.8901	21.9249	22.223	22.2075	21.679	21.7955	21.0597	21.2433
CAD13_HUMAN	INENTGSVSVTR	15.84	-0.357	-0.85	0.40951	0.72	0.40951	NA	NA	16.5426	16.5757	NA	NA	NA	NA	15.7805	NA	NA	15.086	NA	NA	14.4019	NA	NA	16.1378	NA	NA	NA	NA	NA	NA	NA	NA	NA	NA	15.4153	15.6506	NA	NA	15.4193	15.7322	16.2473	16.452	16.4373	NA	NA	NA
CAD13_HUMAN	SIVVSPILIPENQR	17.6	-0.606	-1.8	0.08009	3.25	0.08009	17.0669	17.4017	18.5871	18.6892	15.7087	NA	16.9308	17.0022	17.9293	17.9407	17.118	17.1928	17.3901	16.9655	17.2737	17.0469	18.3641	18.814	16.1923	16.413	17.7156	17.9112	NA	NA	17.0149	17.3219	NA	NA	18.4724	18.3323	NA	NA	18.1801	18.3146	18.9084	18.6395	18.2581	18.1208	17.0663	16.4092
CAD13_HUMAN	TPHAEDMAELVIVGGK	19.87	-0.303	-0.84	0.40777	0.7	0.40777	20.6916	NA	17.521	NA	19.4305	NA	20.3191	20.1665	20.416	20.2541	19.7648	19.0937	19.4152	19.6202	18.9678	18.9752	20.6195	20.3298	19.7372	19.7781	20.4013	20.3741	NA	19.9722	20.1723	19.9846	18.0562	17.2315	20.2425	20.0215	18.6364	NA	20.7111	20.6401	21.0093	20.8849	20.8346	20.2871	20.476	20.269
CAD13_HUMAN	TLEGPVPLEVIVIDQNDNRPIFR	17.53	-0.194	-0.49	0.62509	0.24	0.62509	NA	NA	19.2362	18.9666	NA	NA	16.3559	16.7881	17.9342	17.9045	NA	17.4422	17.1796	17.3035	17.0481	17.2351	NA	NA	16.1713	15.9299	17.0491	NA	NA	NA	NA	16.3291	NA	NA	18.653	18.5021	16.6652	16.6191	18.0614	17.9564	18.883	18.826	17.8335	18.2706	16.6578	NA
CADH2_HUMAN	FLIYAQDK	19.43	0.217	1.5	0.1418	2.24	0.1418	19.5869	19.3557	20.0265	19.8826	19.2501	19.2703	19.384	19.3554	19.6182	19.676	19.4299	19.1981	19.4472	19.5319	19.5946	19.6712	19.5134	19.6338	19.7216	19.5921	19.5431	19.5683	18.925	19.1407	19.1793	19.2195	18.6149	18.4241	19.6923	19.7557	18.8626	18.7466	19.8358	19.8652	19.6456	19.5051	19.7345	19.5498	19.343	19.2576
CADH2_HUMAN	SFPLSSEHAK	17.03	0.288	1.24	0.2227	1.53	0.2227	16.4213	17.0321	17.9841	17.8547	16.6229	16.5593	17.3627	17.1145	16.8898	17.2194	17.0222	17.1374	17.0923	17.4008	17.2655	17.3611	17.5418	17.2265	17.1578	17.204	16.724	16.6959	16.4136	16.3481	16.8056	17.1232	15.5896	16.0417	17.6217	17.6656	16.1102	16.1504	17.5515	17.6583	17.6502	17.6382	17.6729	17.4283	16.1757	16.6517
CADH2_HUMAN	VDEDGMVYAVR	20.29	0.123	0.72	0.48047	0.51	0.48047	20.2358	NA	20.6751	20.7334	NA	NA	19.9944	NA	20.3986	20.2564	20.178	20.2168	20.3333	20.3539	20.1547	NA	NA	NA	20.4742	NA	20.1788	20.2508	NA	NA	19.9347	NA	19.4433	NA	20.6024	20.383	NA	NA	20.5316	20.5202	20.3582	20.1457	20.3485	20.3557	NA	NA
CADH2_HUMAN	DVHEGQPLLNVK	20.91	0.273	1.13	0.27018	1.28	0.27018	NA	20.9483	21.2966	21.2129	NA	NA	NA	NA	20.8434	NA	20.7756	20.9037	21.0372	NA	NA	NA	NA	21.187	NA	21.0715	NA	NA	NA	20.5955	NA	NA	NA	19.8113	NA	21.1545	19.9394	20.328	21.2764	21.2843	21.0431	21.1501	21.2908	21.0161	NA	NA
CADH2_HUMAN	VQYESSEPADFK	19.03	0.256	0.58	0.56562	0.34	0.56562	19.2419	19.5633	NA	NA	19.1473	19.2207	NA	19.0513	NA	18.2693	NA	18.5831	19.3334	19.4246	17.6743	19.3683	19.6186	19.5735	19.4269	19.6736	20.078	18.9587	18.3343	18.9094	19.0084	18.8773	NA	17.6815	NA	NA	18.4258	NA	NA	19.5989	NA	NA	NA	NA	18.8104	18.9009
CADH2_HUMAN	ESAEVEEIVFPR	21.36	0.31	1.3	0.20515	1.68	0.20515	21.7849	21.8604	NA	21.5286	21.3624	21.496	21.4204	21.3097	NA	NA	20.8281	NA	21.3361	21.062	21.9835	21.6009	21.4949	21.5389	21.5896	21.181	22.1288	22.1808	NA	21.2458	NA	NA	NA	20.0097	NA	NA	NA	20.631	21.8984	21.5816	21.2107	21.2954	NA	21.291	20.6599	20.4738
CADH2_HUMAN	LSLKPTLTEESVK	20.63	0.317	1.69	0.09964	2.86	0.09964	20.5589	20.8828	21.1412	21.3718	20.0667	20.1485	20.7588	20.7788	20.9797	20.9045	NA	20.7808	20.6878	20.8268	20.6297	20.687	20.5294	20.7596	20.7262	20.8339	20.5051	20.7175	19.8433	NA	20.0689	20.34	NA	19.6722	21.1681	20.8366	20.0344	20.0504	21.1329	21.2133	NA	NA	21.0451	21.0515	20.1799	20.0692
CADH2_HUMAN	TGFPEDVYSAVLSK	18.79	0.188	1.19	0.24208	1.41	0.24208	19.0445	18.8956	19.4293	19.3829	18.5211	18.3385	18.7989	18.811	18.8516	18.8541	18.9212	19.124	19.0711	18.9524	18.9921	18.8638	18.5711	18.6525	18.8306	18.7356	18.5467	18.8016	17.7292	17.8081	18.7774	18.5344	18.1736	18.3123	19.1651	19.2107	18.5817	18.3552	19.2353	19.0879	19.0944	19.1978	18.9313	19.176	18.5284	18.6418
CADH2_HUMAN	KVQYESSEPADFK	17.15	0.779	1.96	0.06037	3.83	0.06037	NA	NA	17.784	17.1464	17.4648	NA	NA	17.5347	17.4836	NA	16.6619	NA	16.4923	16.897	18.1706	17.1622	18.5426	17.789	17.7231	18.0719	NA	NA	NA	NA	NA	16.6522	NA	15.1049	17.6295	16.8984	16.3048	15.9085	17.8281	17.8313	17.3477	17.5355	NA	16.5466	16.566	16.089
CADH4_HUMAN	VGADGTVFATR	16.35	-0.099	-0.36	0.72152	0.13	0.72152	15.3289	15.9425	17.0113	NA	16.4104	NA	NA	15.4907	16.7401	NA	NA	16.3423	NA	15.9912	16.6831	16.1535	16.6367	16.8991	NA	16.3545	16.4293	16.3503	NA	15.8152	15.7546	16.2449	NA	NA	16.9964	NA	NA	NA	NA	16.5973	16.9707	NA	16.8399	16.7099	NA	15.7746
CADM1_HUMAN	SDDSVIQLLNPNR	20.35	0.302	1.7	0.09597	2.91	0.09597	20.821	20.8265	20.1665	20.4567	20.7315	20.738	20.2684	20.7343	20.545	20.809	20.4044	20.2239	20.2741	20.5102	20.581	20.5127	20.3941	20.4865	20.0787	20.325	20.018	20.2117	19.8679	20.3978	20.1756	20.2992	NA	19.8854	20.5376	20.6031	19.2408	19.4413	20.6332	20.7897	20.5628	20.5314	20.4453	20.2491	19.8632	20.154
CADM1_HUMAN	SEVEEWSDMYTVTSQLMLK	16.07	-0.185	-0.34	0.73836	0.11	0.73836	15.4154	NA	17.2409	17.0225	14.7672	15.0171	16.5625	14.7622	15.6923	15.5261	16.6336	15.4842	16.1015	NA	16.9062	16.2116	NA	NA	16.4164	NA	15.6041	NA	17.0931	NA	15.8456	NA	NA	NA	16.3722	16.3491	NA	NA	17.6525	16.1498	16.1536	15.624	16.7926	15.9787	15.6965	14.8392
CADM1_HUMAN	EDDGVPVICQVEHPAVTGNLQTQR	18.56	0.264	1.4	0.1698	1.96	0.1698	18.9308	19.1263	18.6227	18.8604	18.8187	18.8732	19.0458	19.3042	19.1183	19.0576	18.231	18.3237	18.0975	18.2377	18.1531	18.399	18.2635	18.6279	18.6209	18.9005	18.2665	18.3482	18.1159	18.5171	18.2042	18.4699	NA	NA	18.4248	18.3833	NA	NA	18.5508	18.771	18.4983	18.787	18.2923	18.4977	18.0587	18.4782
CADM1_HUMAN	EGDALELTCEAIGKPQPVMVTWVR	20.41	-0.065	-0.21	0.83232	0.05	0.83232	20.4491	20.43	21.048	21.183	20.1506	20.0582	20.5053	20.5722	20.8372	21.0009	20.679	20.7721	20.7385	20.7413	20.6483	21.0755	18.9835	17.6858	19.992	19.9845	20.2284	20.0064	20.3248	20.2111	20.2918	20.0664	19.5363	19.999	21.0841	21.2172	19.7019	19.9919	21.35	21.2516	21.1022	20.6683	20.7129	21.1618	19.7892	20.1322
CADM1_HUMAN	VHKEDDGVPVICQVEHPAVTGNLQTQR	18.22	0.237	0.96	0.34126	0.93	0.34126	19.0275	18.7411	17.7739	18.0098	18.9495	18.6867	18.8065	19.3136	18.4762	17.9977	NA	17.5722	17.6168	18.1384	17.8873	17.8424	18.5403	18.4793	17.9394	18.2732	17.7745	18.1361	18.3266	18.466	18.3974	18.2338	NA	16.7924	18.1864	18.1102	NA	NA	18.316	18.6391	18.7819	18.5727	18.1829	18.0321	17.4596	17.5164
CADM2_HUMAN	SDDGVAVICR	17.14	0.053	0.22	0.83018	0.05	0.83018	NA	16.603	17.248	17.5225	NA	NA	NA	NA	17.0539	17.1975	NA	NA	NA	NA	17.2321	NA	17.5689	NA	16.8512	16.8875	16.663	16.9939	NA	NA	NA	NA	NA	NA	17.092	17.1435	NA	NA	17.4008	17.482	17.6328	17.6507	NA	17.0157	NA	16.3648
CADM2_HUMAN	GKPLPEPVLWTK	18.01	0.153	0.5	0.62092	0.25	0.62092	18.4497	17.9063	18.7646	18.5595	17.6282	17.4426	18.1889	NA	17.8586	NA	17.4486	NA	NA	17.5798	18.0308	18.0692	18.2958	18.0942	NA	17.9325	18.3717	18.2726	17.4578	17.9057	17.7949	NA	15.4077	NA	18.5573	18.262	16.638	NA	18.4357	18.3739	19.0992	18.5316	18.6658	18.5551	17.8699	17.7532
CADM2_HUMAN	IIPSTPFPQEGQPLILTCESK	19.42	0.297	0.81	0.42156	0.66	0.42156	20.3653	19.2611	19.4613	19.586	19.8183	19.6509	20.3228	19.3534	19.1789	19.7306	19.4561	18.809	18.9389	18.98	20.1438	19.5837	20.1215	19.4249	19.7759	19.423	19.4274	19.2062	19.6591	18.7489	19.2396	18.996	17.63	18.4647	19.7848	19.917	17.741	17.6286	19.9638	20.0463	19.931	19.9261	19.9384	19.7269	20.1433	19.332
CADM2_HUMAN	AYLTVLGVPEKPQISGFSSPVMEGDLMQLTCK	17.59	-0.424	-0.75	0.4624	0.57	0.4624	NA	NA	19.1493	18.8293	NA	NA	NA	NA	16.8378	16.9741	16.527	NA	NA	NA	NA	17.2124	NA	NA	NA	16.259	NA	NA	NA	NA	NA	NA	NA	NA	18.1772	18.0385	NA	NA	18.0175	NA	18.5601	18.3835	17.1059	17.9317	15.9175	NA
CADM3_HUMAN	LLLHCEGR	18.48	-0.173	-0.18	0.85447	0.03	0.85447	18.0587	18.535	19.5797	19.6626	19.0465	18.9398	14.2724	18.4753	19.1768	19.2055	18.2535	18.5852	18.516	18.7324	18.8859	18.9639	19.1547	19.282	13.4619	18.8005	18.991	19.3049	18.6805	18.6553	16.7106	18.2103	17.0851	17.4211	19.5118	19.3855	17.7379	NA	19.3012	19.3191	18.9816	19.0505	19.6329	19.3181	17.9298	17.9558
CADM3_HUMAN	KGDQELHGEPTR	11.97	0.391	0.7	0.50478	0.49	0.50478	NA	NA	NA	11.9032	NA	NA	12.9103	NA	NA	NA	NA	11.9098	NA	NA	11.6711	NA	NA	NA	NA	NA	NA	NA	11.1182	NA	NA	NA	NA	NA	NA	NA	NA	NA	NA	NA	NA	12.2971	NA	NA	NA	NA
CADM3_HUMAN	GNPVPQQYLWEK	20.73	0.154	1.21	0.23429	1.46	0.23429	20.7547	20.8697	20.9144	20.9944	20.4497	20.405	20.9562	20.9545	20.9397	20.8496	20.7605	20.9573	20.9218	20.9889	20.8625	20.9169	20.6308	20.456	20.7333	20.7968	20.5986	20.5889	20.4391	20.602	20.6684	20.5924	20.1322	20.1625	21.0659	20.9523	20.0646	20.3842	20.8787	20.9834	21.0378	20.9581	20.9119	21.0536	20.4836	20.4834
CADM3_HUMAN	EDDGASIVCSVNHESLK	20.3	0.259	1.36	0.17989	1.86	0.17989	20.4676	20.6359	19.8403	20.6784	20.1634	20.1741	20.7327	20.7868	20.7118	20.576	20.2901	20.1521	20.4298	20.6258	20.4809	20.525	20.1902	20.4698	20.2094	20.3613	20.0576	20.2354	19.8334	20.1252	20.1328	20.1354	19.6773	19.5273	20.6371	20.6112	19.529	19.7953	20.4583	20.5891	20.765	20.391	20.7331	20.4414	19.7066	19.9425
CADM3_HUMAN	SLVTVLGIPQKPIITGYK	21.18	0.049	0.15	0.8789	0.02	0.8789	21.3245	20.5922	21.7914	21.6096	NA	NA	20.4541	21.2679	21.5288	21.6274	21.5808	21.4897	21.6919	21.4095	21.0283	21.6326	NA	20.1569	20.8768	20.8648	20.9405	20.4574	NA	NA	20.7041	19.963	20.7444	20.8277	21.963	22.0092	20.8082	20.5661	21.8883	21.6994	21.8846	21.863	21.5059	21.7189	20.7236	20.0939
CADM3_HUMAN	IEVLYTPTAMIRPDPPHPR	17.54	-0.017	-0.05	0.96409	0	0.96409	NA	17.4386	17.9465	NA	NA	NA	17.9922	17.9952	NA	NA	NA	NA	NA	NA	NA	NA	NA	16.7676	NA	NA	NA	NA	17.083	17.3712	NA	NA	NA	NA	17.719	NA	NA	NA	17.5644	17.5367	18.3731	18.2475	18.2147	NA	16.4692	16.3536
CADM3_HUMAN	DHEDSSLQWSNPAQQTLYFGEK	19.85	0.203	1.14	0.2589	1.31	0.2589	20.4129	20.1101	19.8576	20.1509	19.7027	19.4007	20.4996	20.5865	20.1091	19.8468	20.0032	19.9729	20.1241	20.0829	20.1648	20.2905	19.0633	18.7987	19.9263	19.988	19.5581	19.558	19.4982	19.6514	19.7171	19.6447	18.9877	19.3856	20.1065	20.0823	19.3767	19.2595	20.1017	20.2308	20.1758	20.1368	19.7798	20.1294	19.8555	19.7936
CADM4_HUMAN	VWSVASTVR	18.84	-0.077	-0.44	0.66178	0.19	0.66178	19.1316	NA	18.574	18.6168	19.0891	18.9092	18.8647	18.7323	18.5782	18.5696	18.3795	18.41	18.828	18.7232	18.8695	18.8895	19.0142	18.8331	19.0789	18.9563	19.228	19.2803	18.723	18.8099	19.1168	19.1999	17.8114	17.71	18.7762	18.3308	18.5027	NA	19.3119	19.2185	19.2607	18.7685	19.2955	19.4028	19.2059	NA
CADM4_HUMAN	FQLEEFSPR	19.65	-0.027	-0.18	0.85707	0.03	0.85707	19.8153	19.9293	19.5704	19.4264	19.8422	19.8295	19.7157	19.7587	19.4446	19.5053	19.148	19.0289	19.5674	19.5185	19.6979	19.8151	19.8062	20.0429	19.5221	19.7348	19.9213	19.9697	19.7023	19.7719	19.8839	19.9339	18.4243	18.4925	19.6592	19.4927	19.316	19.1701	19.9373	19.9141	19.783	19.9113	20.1269	20.0387	19.8542	19.9647
CADM4_HUMAN	QTQYVLDVQYSPTAR	18.88	0.123	0.1	0.92253	0.01	0.92253	19.565	NA	19.6894	NA	NA	NA	NA	NA	NA	NA	19.4535	NA	NA	18.7136	15.9769	19.4613	NA	NA	19.8334	NA	NA	NA	NA	NA	NA	NA	NA	NA	NA	19.8983	NA	NA	19.4194	19.6976	NA	19.7846	NA	NA	17.2694	16.6519
CADM4_HUMAN	LHQYDGSIVVIQNPAR	19.63	-0.038	-0.21	0.83222	0.05	0.83222	19.7783	19.4389	19.2807	19.6468	NA	19.5038	19.8888	19.8521	NA	19.5617	NA	19.4163	19.3802	19.4703	19.7752	19.7059	NA	NA	NA	NA	NA	19.9815	NA	19.3912	19.6452	19.4877	18.6898	NA	19.618	19.4777	NA	NA	19.9919	19.9333	19.8732	19.7977	19.8424	20.1076	19.5678	19.4783
CADM4_HUMAN	EQAVEGGEVELSCLVPR	17.55	-0.217	-0.8	0.42641	0.65	0.42641	17.8411	18.0883	16.3875	16.4235	17.8489	17.7458	17.7248	17.6761	16.9142	16.6581	NA	NA	16.554	16.7163	17.7208	17.2581	17.8423	18.0433	17.9978	17.9195	18.1021	18.5339	17.25	17.4889	17.9234	18.036	NA	NA	16.5875	17.0776	16.2483	NA	17.5354	18.0458	17.9061	18.1015	17.8106	17.924	18.1539	18.0851
CADM4_HUMAN	EGDTLVLTCAVTGNPRPNQIR	17.48	-0.026	-0.1	0.91922	0.01	0.91922	17.9984	18.3595	17.9676	17.7683	17.5007	17.3052	17.4458	17.6197	17.262	17.0973	17.4111	17.3714	17.3957	NA	17.3495	17.4867	17.42	17.6236	17.2225	16.3987	17.7212	17.9796	16.9746	17.5281	16.995	17.6725	16.2158	16.1092	17.4741	17.6801	16.8378	16.6044	17.8153	18.009	18.6131	18.7199	17.8307	17.9631	17.6058	NA
CAH1_HUMAN	GGPFSDSYR	16.23	NA	NA	NA	NA	NA	NA	NA	NA	NA	NA	NA	NA	NA	NA	NA	NA	NA	NA	NA	NA	NA	16.1184	16.3459	NA	NA	NA	NA	NA	NA	NA	NA	NA	NA	NA	NA	NA	NA	NA	NA	NA	NA	NA	NA	NA	NA
CAH1_HUMAN	ADGLAVIGVLMK	18.44	NA	NA	NA	NA	NA	NA	NA	NA	NA	NA	NA	NA	NA	NA	NA	NA	NA	NA	NA	NA	NA	18.7158	18.1707	NA	NA	NA	NA	NA	NA	NA	NA	NA	NA	NA	NA	NA	NA	NA	NA	NA	NA	NA	NA	NA	NA
CAH4_HUMAN	EQILAFSQK	16.21	0.572	0.78	0.45896	0.61	0.45896	NA	15.9037	NA	NA	NA	16.9138	NA	NA	NA	NA	NA	NA	NA	NA	NA	NA	15.9993	16.7598	NA	NA	NA	NA	NA	NA	NA	NA	NA	NA	NA	NA	NA	NA	16.448	NA	15.2056	NA	NA	NA	NA	NA
CAH4_HUMAN	YLGSLTTPTCDEK	15.84	-0.124	-0.17	0.8672	0.03	0.8672	15.4121	15.3256	NA	NA	16.118	16.425	NA	NA	NA	NA	NA	NA	NA	NA	NA	NA	15.5283	16.035	NA	NA	NA	NA	NA	NA	NA	NA	NA	NA	NA	NA	NA	NA	15.6768	16.1864	NA	NA	NA	NA	NA	NA
CALL5_HUMAN	NLSEAQLR	17.7	-0.124	-0.12	0.90363	0.02	0.90363	18.5974	18.4188	NA	16.9999	NA	NA	NA	NA	NA	NA	NA	NA	NA	NA	NA	NA	16.4068	NA	NA	NA	18.0935	NA	NA	NA	NA	NA	NA	NA	NA	NA	NA	NA	NA	NA	NA	NA	15.2723	NA	19.3249	18.4745
CALL5_HUMAN	AFSAVDTDGNGTINAQELGAALK	17.26	NA	NA	NA	NA	NA	17.8266	17.7336	NA	NA	NA	NA	NA	NA	16.2075	NA	NA	NA	NA	NA	NA	NA	NA	NA	NA	NA	NA	NA	NA	NA	NA	NA	NA	NA	NA	NA	NA	NA	NA	NA	NA	NA	NA	NA	NA	NA
CALM_HUMAN	VFDKDGNGYISAAELR	18.95	0.025	0.14	0.89107	0.02	0.89107	18.9671	19.269	17.9477	17.8583	19.2873	19.4328	19.5069	19.707	19.3213	19.2136	19.1056	18.9934	18.9419	19.3195	18.8672	19.0766	19.0498	19.0981	18.1488	18.1459	18.4898	18.5954	19.1195	19.3286	18.806	18.8594	19.1333	19.0496	18.2746	18.3032	19.6418	19.6657	18.8204	19.0433	18.7986	18.7805	19.1985	19.1628	18.7869	18.9064
CALM_HUMAN	EAFSLFDKDGDGTITTK	18.97	0.137	0.47	0.64368	0.22	0.64368	19.1084	19.0988	17.146	17.4714	20.1618	20.3443	20.2637	20.398	20.2081	20.2453	18.0095	18.1765	18.9423	18.9552	18.3984	18.387	18.83	18.9463	18.7298	18.8645	18.1951	18.5806	18.6289	18.8492	18.139	18.3421	17.0767	17.3329	19.3725	19.3566	19.8256	19.8909	18.9456	19.2247	19.1103	19.2477	19.4514	19.5709	19.4476	19.3644
CALR_HUMAN	EQFLDGDGWTSR	18.98	0.16	0.78	0.44177	0.6	0.44177	18.8499	19.1559	19.4286	19.5809	18.8505	18.7124	18.6018	18.8231	19.1385	19.1082	19.4641	19.5621	19.0626	19.191	19.0786	19.4386	NA	17.9109	18.9993	19.1998	18.2861	NA	NA	NA	18.442	18.575	18.9674	18.5503	18.9344	18.9781	18.7007	18.9989	19.0479	19.3833	19.361	19.2602	19.5495	19.1392	18.3046	18.4832
CALR_HUMAN	FYALSASFEPFSNK	16.99	-0.033	-0.09	0.92916	0.01	0.92916	NA	NA	17.7625	17.8783	NA	NA	15.0312	15.5109	17.2811	17.3154	17.7986	17.3103	17.114	16.7088	16.4893	16.8723	NA	NA	17.1998	16.5999	NA	NA	NA	15.8957	NA	NA	16.9478	NA	17.4437	17.1825	NA	16.4806	17.7401	17.5649	17.0867	17.1401	16.9126	17.3839	NA	NA
CALR_HUMAN	KPEDWDEEMDGEWEPPVIQNPEYK	16.64	0.729	1.89	0.0762	3.57	0.0762	NA	NA	17.2039	17.3875	NA	NA	NA	NA	16.2614	16.8566	NA	17.0664	16.9851	16.4527	17.2495	17.1808	NA	NA	NA	NA	NA	NA	NA	NA	NA	NA	NA	16.5646	NA	NA	NA	15.9103	16.3583	NA	15.9573	15.4698	16.3748	16.9519	NA	NA
CALY_HUMAN	SILAAIGAYPLSR	17.6	-0.056	-0.22	0.82959	0.05	0.82959	18.1432	17.6974	18.5469	18.3164	17.7614	17.5438	17.2446	17.579	17.743	17.6628	17.3316	16.6019	17.8072	17.9064	17.5951	17.9634	17.4084	17.5435	16.4087	16.7503	17.8843	18.0123	17.233	17.2986	17.6392	17.4979	NA	NA	17.9974	17.9192	16.9803	16.1578	18.1653	18.242	17.8838	17.7339	17.9034	18.1169	17.5057	17.2303
CAMKV_HUMAN	NYNQPSEVTDR	16.91	0.21	0.55	0.58243	0.31	0.58243	16.1908	16.4607	17.996	18.1059	NA	NA	15.9532	16.2429	17.2556	17.2757	16.9399	17.0662	17.5429	16.9334	16.8107	17.6124	16.9825	15.7297	17.1894	17.2285	16.9469	16.8634	15.0208	NA	15.9868	16.1504	NA	NA	16.5441	16.5498	15.6958	15.9159	18.1921	18.1837	17.7365	17.6961	17.0707	17.9252	16.9349	17.0355
CART_HUMAN	GTSCNSFLLK	18.26	0.214	0.28	0.78706	0.08	0.78706	NA	NA	18.3387	18.5805	NA	NA	NA	NA	NA	NA	NA	NA	NA	NA	NA	NA	NA	NA	NA	NA	NA	NA	NA	NA	NA	NA	NA	NA	NA	17.4245	NA	NA	NA	19.4115	18.1723	18.1034	18.3028	17.7661	NA	NA
CART_HUMAN	ALDIYSAVDDASHEK	16.55	NA	NA	NA	NA	NA	NA	NA	17.2372	16.9457	NA	NA	NA	NA	NA	NA	NA	NA	NA	NA	NA	15.4547	NA	NA	NA	NA	NA	NA	NA	NA	NA	NA	NA	NA	NA	NA	NA	NA	NA	NA	NA	NA	NA	NA	NA	NA
CATB_HUMAN	ICEPGYSPTYK	16.84	0.407	0.88	0.38451	0.78	0.38451	16.5964	NA	14.8069	15.6519	NA	NA	NA	NA	17.7374	17.3296	NA	15.5512	17.1389	NA	17.8227	17.9555	17.8429	17.738	17.6169	17.9652	NA	NA	17.7519	NA	NA	NA	14.4664	NA	NA	16.3004	17.6625	17.9285	17.1614	17.3752	15.6285	15.7019	15.663	16.1897	17.1764	17.074
CATB_HUMAN	GQDHCGIESEVVAGIPR	17.33	0.363	1.14	0.26336	1.29	0.26336	NA	17.5287	NA	16.3325	17.4631	17.4353	NA	17.5806	17.6284	17.2675	16.2282	16.9927	17.086	17.3622	17.9996	18.1989	18.1611	18.2879	18.0079	18.2248	NA	16.1628	17.7036	18.328	17.2721	17.1037	NA	NA	16.3995	15.8368	18.1272	18.4984	17.481	17.8378	16.2148	16.4667	16.5093	16.324	17.5729	17.754
CATB_HUMAN	VMFTEDLKLPASFDAR	16.74	0.151	0.35	0.73453	0.12	0.73453	16.6279	NA	NA	NA	NA	NA	NA	NA	NA	NA	NA	NA	NA	NA	16.9206	16.9303	NA	NA	NA	NA	NA	NA	16.6603	NA	15.8101	NA	NA	NA	NA	NA	17.263	16.8897	16.8982	NA	NA	NA	NA	NA	16.679	NA
CATD_HUMAN	YYTVFDR	18.76	0.332	1.59	0.12375	2.51	0.12375	18.6604	NA	NA	NA	18.8336	18.5932	18.5168	18.709	18.955	19.0169	18.1571	17.9901	NA	NA	19.1098	19.1616	19.2448	19.3362	19.561	19.7136	18.3725	18.582	18.647	19.0767	NA	18.566	NA	NA	18.1844	NA	18.7433	18.5938	18.4215	NA	NA	NA	18.2819	18.2182	18.839	19.1726
CATD_HUMAN	VSTLPAITLK	19.85	0.335	1.64	0.10778	2.7	0.10778	20.1618	20.2175	19.049	18.913	20.1436	20.2216	20.0152	20.1566	20.1809	20.111	19.2931	19.3811	19.243	19.315	20.2131	20.2883	20.9208	21.0554	20.7305	20.7872	19.9079	19.9739	20.1415	20.278	20.1615	20.2646	18.7262	18.4512	19.5812	19.4369	19.8256	19.8419	19.5344	19.5781	19.2012	19.2137	19.2856	19.3814	20.4018	20.5164
CATD_HUMAN	LSPEDYTLK	19.83	0.34	1.46	0.15323	2.12	0.15323	20.1001	20.1335	18.8217	19.1362	20.1053	20.2381	20.014	20.1044	20.1595	20.1652	18.9874	19.0527	18.9928	19.2188	20.3399	20.2089	20.8915	21.0822	20.7613	20.801	19.7461	19.9093	20.1718	20.433	20.0156	20.2186	NA	18.2888	19.3803	19.406	19.9313	19.7651	19.6133	19.666	18.9753	18.8772	19.3037	19.3451	20.4654	20.5242
CATD_HUMAN	FDGILGMAYPR	22.45	-0.2	-1.16	0.25115	1.35	0.25115	22.6173	22.3949	21.4487	21.5742	22.5775	22.6782	22.5051	22.7227	22.0225	22.0021	22.882	22.8318	22.5813	22.7333	22.574	22.5756	22.5867	22.6713	21.3451	21.6338	22.6663	22.699	22.9039	22.9498	22.8447	22.6603	23.1712	23.3558	22.3177	22.3451	22.9136	22.9585	22.0577	22.0205	22.0066	22.1414	22.0876	22.1839	22.3312	22.3462
CATD_HUMAN	LLDIACWIHHK	18.27	-0.032	-0.09	0.93116	0.01	0.93116	19.2467	18.6175	18.2759	17.1067	18.5736	18.3374	18.6677	18.9197	18.3623	18.1421	17.7832	17.3415	17.9193	16.8064	18.911	19	17.2781	16.6564	19.4783	19.2292	18.3476	18.0835	18.6974	18.8721	18.7995	18.2289	17.4983	NA	17.8681	17.6656	18.7879	18.1579	18.2672	17.7739	18.4877	18.1247	17.4891	18.0734	19.5612	18.9035
CATD_HUMAN	TMSEVGGSVEDLIAK	20.92	0.431	2.02	0.05027	4.09	0.05027	21.4055	21.5712	NA	NA	21.0674	21.0733	21.1161	21.257	21.1705	21.045	20.1986	20.2847	20.5188	20.1524	21.3519	21.1574	21.7415	21.7725	21.8124	21.7692	20.8754	20.8431	21.1331	21.3276	21.3658	21.3333	20.2276	20.1206	20.3005	NA	21.0568	20.8505	20.4755	20.3018	20.249	19.8354	20.1201	20.126	21.61	21.5996
CATD_HUMAN	LVDQNIFSFYLSR	18.19	-0.235	-0.58	0.56456	0.34	0.56456	18.3392	18.0641	18.4623	17.9832	17.7027	16.7565	18.4337	18.1097	18.9825	18.9439	18.5075	18.2435	18.3006	17.6535	19.0496	19.2113	14.5417	NA	19.1197	18.5097	18.3333	17.2408	18.5094	18.1881	18.2207	18.0168	17.7565	17.5703	18.5699	18.1907	18.9664	18.5716	18.4586	17.9071	18.315	17.5399	18.0759	18.1665	18.9883	19.0828
CATD_HUMAN	DPDAQPGGELMLGGTDSK	19.28	0.565	2.25	0.03015	5.06	0.03015	19.633	19.9205	NA	18.9664	19.3797	19.2741	19.6523	19.7121	19.68	19.7897	18.6466	18.802	18.2284	18.4487	19.7729	19.5169	20.3064	20.5197	20.5882	20.6351	18.7454	19.0779	19.5626	19.9055	19.3722	19.3215	NA	18.1107	18.8325	18.9768	19.1229	19.2093	18.8931	19.0605	17.9532	18.4014	18.2144	18.2666	19.8011	20.1657
CATD_HUMAN	YSQAVPAVTEGPIPEVLK	18.16	0.129	0.44	0.66124	0.2	0.66124	19.0542	19.0922	16.8452	NA	18.1894	18.1274	18.6371	19.1228	17.4917	17.071	17.8008	17.7857	17.3574	17.354	18.5859	18.6065	19.4118	19.6273	18.1482	18.4171	17.8141	18.3074	17.8497	18.3538	16.605	17.2052	NA	NA	18.311	18.3975	18.7465	18.538	17.8986	18.0253	18.4738	18.923	18.1388	17.9519	17.6787	17.8453
CATD_HUMAN	ISVNNVLPVFDNLMQQK	20.35	0.11	0.53	0.59762	0.28	0.59762	20.6079	20.6007	20.3319	20.4493	19.5204	19.8285	20.2669	20.3459	20.9261	20.8551	20.2908	20.1902	19.9632	19.6688	21.0076	20.8951	20.1168	19.6589	21.4996	21.0566	20.2773	20.1292	20.3675	20.4458	20.3641	20.7148	19.4416	19.3297	20.2033	20.2282	20.5057	20.3648	20.5402	20.604	20.3391	19.9545	19.8611	20.118	20.9827	21.118
CATD_HUMAN	AIGAVPLIQGEYMIPCEK	20.75	0.217	1.12	0.26925	1.25	0.26925	21.0683	21.0694	20.3596	20.552	20.5274	20.5087	20.775	20.9794	20.8953	21.1802	20.5228	20.4275	20.0748	19.9314	21.3054	21.2739	21.2738	20.8864	21.7528	21.708	20.7866	20.5329	20.958	20.9174	20.9213	20.5686	19.6851	19.6807	20.6621	20.9237	20.6274	20.4988	20.8161	20.7903	20.5592	20.2783	20.2324	20.4329	21.5345	21.329
CATH_HUMAN	GIMGEDTYPYQGK	18.27	0.158	0.31	0.75837	0.1	0.75837	NA	NA	18.5379	19.0798	NA	NA	NA	NA	18.3979	18.2993	17.1134	NA	NA	NA	18.806	NA	NA	NA	NA	NA	NA	NA	18.9444	NA	NA	NA	16.191	NA	18.7552	18.8	18.5041	NA	NA	NA	18.1621	17.9454	18.2223	NA	NA	NA
CATH_HUMAN	MLSLAEQQLVDCAQDFNNHGCQGGLPSQAFEYILYNK	15.66	0.866	1.23	0.25116	1.5	0.25116	NA	NA	16.669	15.95	NA	NA	NA	NA	NA	NA	NA	NA	NA	NA	NA	15.9393	NA	NA	NA	NA	NA	NA	NA	NA	NA	NA	NA	NA	15.8617	15.5582	NA	NA	NA	NA	13.9099	NA	NA	15.2894	NA	16.1159
CATL1_HUMAN	VFQEPLFYEAPR	18.85	0.241	1.66	0.1054	2.74	0.1054	18.896	19.1071	18.8127	18.8181	19.1055	19.233	19.0349	19.3013	19.084	18.9455	18.7447	18.6419	18.9219	18.9563	18.7868	18.9168	19.2244	19.4279	18.8801	18.6336	18.4624	18.8193	18.6217	18.7315	18.9125	19.047	18.0638	18.1739	18.7099	18.7739	18.5511	18.4281	19.0786	19.0884	19.0667	19.2265	18.6539	18.9641	18.7413	18.5465
CATS_HUMAN	GPVSVGVDAR	14.21	NA	NA	NA	NA	NA	NA	NA	NA	NA	NA	NA	NA	NA	NA	NA	NA	NA	NA	NA	NA	NA	NA	NA	NA	NA	NA	NA	13.8403	14.5875	NA	NA	NA	NA	NA	NA	NA	NA	NA	NA	NA	NA	NA	NA	NA	NA
CATZ_HUMAN	VGDYGSLSGR	16.39	-0.568	-0.85	0.4034	0.72	0.4034	NA	NA	NA	15.3139	16.6231	16.9254	16.6043	15.8778	16.1975	15.8826	NA	16.6098	15.0598	14.7031	16.2515	15.006	16.9355	16.8815	16.8389	16.3856	14.7854	17.7787	16.2966	17.2108	16.1566	17.337	17.463	18.2171	NA	NA	16.5266	16.2957	15.71	15.2796	NA	NA	NA	NA	17.0704	17.4305
CATZ_HUMAN	NVDGVNYASITR	17.84	0.267	0.99	0.33514	0.98	0.33514	NA	18.7516	NA	17.3566	NA	NA	NA	NA	17.8221	17.8806	NA	NA	NA	NA	17.6056	17.4316	NA	NA	18.4117	18.6551	17.2981	NA	NA	NA	NA	18.2675	NA	NA	17.5339	NA	NA	18.3407	17.5506	17.6179	17.6638	17.6253	NA	17.2185	NA	18.0021
CBG_HUMAN	ITQDAQLK	17.8	-0.006	-0.01	0.99052	0	0.99052	NA	NA	NA	NA	17.9926	18.0058	NA	17.3804	NA	NA	NA	NA	NA	NA	NA	16.9929	18.071	18.5063	NA	NA	NA	NA	17.8196	17.8895	NA	17.5111	NA	NA	NA	NA	NA	NA	NA	NA	NA	NA	NA	NA	NA	NA
CBG_HUMAN	MNTVIAALSR	18.54	0.051	0.22	0.82912	0.05	0.82912	18.7284	18.8985	17.3148	17.3517	19.1347	19.2633	18.431	18.6719	18.0806	17.8901	18.3875	18.0061	18.1244	18.3162	18.5679	18.6055	19.4869	19.5732	19.0952	19.3231	19.0203	19.0472	19.0113	19.2321	19.3219	19.2667	19.1534	18.9111	18.1034	18.0401	18.6036	18.7645	17.6729	17.8081	17.8024	17.741	18.0763	17.5076	18.5198	18.6288
CBG_HUMAN	WSAGLTSSQVDLYIPK	18.4	0.209	0.54	0.59364	0.29	0.59364	17.5013	18.3928	NA	NA	18.7944	18.6542	18.4379	19.0879	NA	18.0007	18.501	18.5214	18.2569	18.3965	NA	18.8629	18.3463	18.2026	18.8312	19.2736	18.7592	18.7902	18.6975	18.9256	19.4143	19.4132	18.9544	19.7195	17.4045	17.4009	18.6511	18.7462	16.1505	17.6996	16.793	17.2772	NA	17.8065	18.4517	18.8354
CBG_HUMAN	SETEIHQGFQHLHQLFAK	19.86	0.592	1.48	0.15344	2.2	0.15344	19.5589	19.1685	NA	NA	19.1542	19.1318	NA	18.839	20.9279	20.6793	NA	20.8098	NA	20.887	21.3046	NA	NA	NA	NA	NA	NA	19.4979	NA	19.9179	NA	18.9932	19.6695	NA	20.5241	NA	NA	NA	20.4278	20.4566	18.4461	NA	NA	NA	NA	18.912
CBG_HUMAN	KNIFISPVSISMALAMLSLGTCGHTR	15.64	-0.527	-0.92	0.36838	0.85	0.36838	NA	NA	15.6769	15.3502	NA	NA	13.3138	NA	14.8533	NA	16.7359	16.1411	15.7054	14.7658	16.3201	16.3068	NA	NA	NA	14.3584	NA	NA	14.9212	15.2925	NA	NA	17.5056	18.1547	15.417	NA	16.114	16.4516	NA	NA	NA	NA	NA	14.844	14.5869	NA
CBLN3_HUMAN	ASGSFVAPVR	19.44	0.022	0.05	0.95755	0	0.95755	20.9558	20.9963	18.103	18.4815	20.5086	20.6779	19.917	18.9897	19.1469	20.0889	19.1999	18.8872	19.9372	20.004	18.82	18.7818	18.8218	18.2774	19.2571	19.212	20.6568	20.2631	18.2225	17.0865	20.6098	20.8499	17.3105	17.7001	19.4162	19.5134	18.9337	19.5389	19.8563	20.0968	19.0326	19.0313	19.2919	19.3127	21.097	20.8054
CBLN4_HUMAN	GSSSSPLGISVR	17.48	-0.42	-0.41	0.69463	0.16	0.69463	NA	NA	19.2029	18.3088	14.8734	NA	NA	NA	NA	NA	NA	NA	NA	NA	NA	NA	NA	NA	NA	NA	NA	NA	NA	NA	NA	NA	17.2159	NA	16.6961	NA	NA	NA	NA	NA	18.3028	18.2362	16.9809	NA	NA	NA
CBPB2_HUMAN	DTGTYGFLLPER	17.98	-0.071	-0.25	0.80288	0.06	0.80288	16.8337	NA	16.8804	17.1594	18.0583	18.0044	18.0073	18.5735	17.9691	17.7295	18.6577	18.4726	18.1908	18.3148	17.9074	17.8185	17.9347	17.9472	18.3279	18.6662	17.8445	18.1906	18.2352	18.7713	18.1543	18.235	19.2021	19.5443	17.0828	17.6403	18.8453	18.8973	17.1169	17.1065	17.0048	17.2249	17.4966	17.2875	NA	NA
CBPE_HUMAN	SNAQGIDLNR	17.69	0.095	0.11	0.91778	0.01	0.91778	NA	NA	NA	NA	NA	18.3249	NA	NA	NA	NA	NA	NA	NA	NA	NA	NA	NA	NA	NA	17.1233	NA	NA	NA	NA	17.6289	NA	NA	NA	NA	NA	NA	NA	NA	NA	NA	NA	NA	NA	NA	NA
CBPE_HUMAN	LTASAPGYLAITK	19.53	0.166	0.9	0.37361	0.81	0.37361	19.7853	19.9086	19.9923	19.9555	19.8327	20.0055	19.7091	20.0519	20.1072	20.03	19.4252	19.5308	18.6687	18.8427	18.9412	19.0594	19.643	19.7279	19.5983	19.4562	19.6738	19.7781	19.2343	19.459	20.1905	20.284	18.6946	18.5093	20.0971	20.0561	19.0551	18.9673	19.5355	19.6304	19.9324	19.8034	18.8427	18.8902	19.0111	19.3021
CBPE_HUMAN	YIGNMHGNEAVGR	17.31	0.185	0.3	0.77829	0.09	0.77829	NA	NA	NA	NA	NA	NA	NA	NA	17.4714	17.443	NA	17.1893	NA	NA	NA	NA	NA	NA	NA	NA	NA	NA	NA	NA	NA	NA	17.1432	NA	NA	NA	NA	NA	NA	NA	NA	NA	NA	NA	NA	NA
CBPE_HUMAN	IHIMPSLNPDGFEK	19.12	-0.043	-0.1	0.92331	0.01	0.92331	19.4515	19.2325	19.8805	19.4444	19.0142	18.9408	19.3258	19.5246	19.6205	19.4733	19.6293	19.8286	18.364	17.7773	18.4666	18.5753	NA	18.4408	19.0741	18.9553	19.1428	19.2139	18.5623	18.879	19.2846	19.4016	17.5779	19.7081	20.5204	20.8188	18.6783	18.0124	19.808	19.2903	19.3059	19.3574	19.6968	17.8666	NA	18.605
CBPE_HUMAN	SGSAHEYSSSPDDAIFQSLAR	20.03	0.26	1.28	0.20728	1.64	0.20728	20.7141	20.6576	20.2007	20.44	20.375	20.4648	20.6883	20.9068	20.7234	20.6382	20.0566	19.9418	19.283	19.3787	19.5287	19.6477	19.8173	19.9578	19.7915	19.9047	20.0034	20.1524	19.7025	20.1551	20.5792	20.4679	18.8035	19.17	20.4764	20.3977	19.6492	19.5881	19.9239	20.1724	19.9309	20.1718	19.4623	19.3148	NA	NA
CBPE_HUMAN	ELLVIELSDNPGVHEPGEPEFK	19.98	-0.258	-0.75	0.46219	0.56	0.46219	NA	NA	19.6237	19.7274	19.568	NA	20.56	20.7647	19.7886	19.6398	20.5392	20.6379	20.9061	20.6064	19.6871	19.9481	NA	NA	17.9589	18.1434	19.1991	18.7787	NA	NA	NA	NA	19.6039	19.9611	19.7628	19.6247	20.4768	20.4619	NA	NA	20.6669	20.7824	20.9548	21.1041	NA	NA
CC126_HUMAN	TIAVLLDDILQR	15.76	NA	NA	NA	NA	NA	NA	NA	15.7554	NA	NA	NA	NA	NA	NA	NA	NA	NA	NA	NA	NA	NA	NA	NA	NA	NA	NA	NA	NA	NA	NA	NA	NA	NA	NA	NA	NA	NA	NA	NA	NA	NA	NA	NA	NA	NA
CC129_HUMAN	SQGSDNLQEGQEK	16.8	0.306	0.84	0.40682	0.7	0.40682	16.904	17.1635	16.7882	17.2087	18.3563	NA	16.2755	16.8192	16.915	16.8522	15.4248	15.9598	15.9499	16.1218	16.144	16.4465	18.6023	18.7573	16.983	17.0996	16.3849	16.8696	15.8107	16.3411	17.3998	18.071	NA	NA	16.3507	16.422	15.2659	NA	16.8817	17.127	16.6354	16.9328	15.5062	15.6877	17.9868	18.3738
CCKN_HUMAN	AHLGALLAR	16.86	-0.32	-0.53	0.61636	0.28	0.61636	NA	NA	17.0566	NA	NA	NA	NA	NA	16.0948	NA	NA	NA	NA	NA	NA	NA	NA	NA	NA	NA	NA	NA	NA	NA	NA	NA	NA	NA	NA	NA	NA	NA	16.3819	NA	17.3861	17.3575	NA	NA	NA	NA
CCL14_HUMAN	WVQDYIK	16.64	-0.452	-1.05	0.31217	1.11	0.31217	16.3484	15.8986	NA	NA	NA	NA	NA	17.0526	NA	NA	NA	NA	NA	NA	NA	NA	15.7833	NA	NA	NA	NA	NA	16.809	16.8483	16.8128	16.3943	NA	17.0866	NA	NA	NA	NA	NA	NA	NA	NA	NA	15.9494	17.4084	17.2446
CCND3_HUMAN	ACQEQIEAALRESLR	19.19	0.211	0.98	0.33531	0.95	0.33531	19.4538	19.6897	19.5784	19.7941	19.4595	19.6948	19.0539	19.392	19.4275	19.4532	18.888	18.8808	18.8503	19.3502	18.6335	18.988	19.1034	19.446	19.0009	19.1868	19.4844	19.7856	18.7075	19.3387	19.0592	19.272	NA	18.7359	19.2221	19.3804	NA	18.4206	19.1082	19.4539	18.9472	19.3348	19.0143	19.06	18.4737	19.0146
CD044_HUMAN	MASKLFEMTGER	18.44	-0.055	-0.11	0.91358	0.01	0.91358	20.1035	21.0476	NA	16.8293	18.9471	19.4882	19.196	18.0446	17.9492	19.0408	17.3745	17.7411	17.9096	17.9881	NA	17.2511	18.5356	17.8426	18.014	17.4033	19.1242	18.7205	NA	NA	19.589	19.77	NA	15.7711	NA	17.5206	NA	17.9778	18.9333	18.9771	17.9225	17.7919	17.7183	17.6983	19.9413	20.3615
CD048_HUMAN	TETLLLQAER	19.63	0.124	0.56	0.5764	0.32	0.5764	19.6238	19.9553	20.3244	20.5584	19.6053	19.7264	19.3881	19.4264	20.0106	20.0691	19.3876	19.3174	19.3819	19.6898	19.7242	19.5968	19.6921	19.8223	19.187	19.3509	20.0349	20.1572	19.0706	19.4312	19.1637	19.4411	18.2342	18.2396	20.3714	20.3473	18.6512	18.9324	20.2209	20.2366	20.0429	20.1991	20.3327	20.1743	18.8463	19.2392
CD14_HUMAN	ATVNPSAPR	16.92	-0.204	-0.62	0.54143	0.38	0.54143	14.7615	NA	17.8729	17.791	17.4779	17.2282	17.716	17.6402	17.3698	16.9794	17.0571	17.5312	16.6883	17.0252	15.9183	NA	15.7346	16.1826	16.5743	16.3816	16.2749	16.8573	17.9284	17.85	16.1879	16.3969	17.0569	NA	17.6414	17.569	17.467	17.5329	16.939	16.8315	17.7653	17.725	17.0318	NA	15.17	14.8171
CD14_HUMAN	ELTLEDLK	18.34	-0.31	-1.19	0.24188	1.41	0.24188	17.6707	17.793	19.3492	19.3647	18.2061	18.4268	18.4844	18.8202	19.0656	18.996	18.8399	18.7657	18.3473	18.2264	17.6685	17.693	16.0318	16.4612	17.7215	17.8432	18.5307	18.6542	19.0111	19.2321	18.3622	18.3388	18.4806	18.0389	19.174	19.1166	18.8148	18.9769	18.1497	18.2241	19.1281	19.1042	18.2051	18.1326	17.0914	17.2089
CD14_HUMAN	VLDLSCNR	19.8	-0.279	-1	0.32331	1	0.32331	18.5443	18.9835	20.6257	20.7309	19.9443	20.0015	20.347	19.5838	19.9108	20.2216	20.0124	19.8275	19.882	19.9321	19.2012	19.0809	18.718	18.6695	19.5217	19.561	19.9325	19.7882	20.454	19.5702	19.8138	20.0675	19.3012	19.7186	20.5193	20.5667	19.8773	20.5287	19.8223	19.8558	20.7491	20.7612	20.0025	19.4724	19.278	18.8038
CD14_HUMAN	GLMAALCPHK	16.91	0.044	0.07	0.94406	0.01	0.94406	15.2999	15.3085	18.392	17.9998	NA	NA	NA	NA	NA	NA	17.4693	17.2245	NA	16.3249	NA	NA	NA	NA	NA	NA	NA	NA	NA	NA	NA	NA	17.666	16.9166	17.8976	17.616	NA	17.1727	NA	NA	NA	NA	NA	15.9063	NA	15.5417
CD14_HUMAN	FPAIQNLALR	19.22	-0.197	-0.9	0.3744	0.81	0.3744	NA	18.7327	19.6823	19.5815	NA	NA	19.5072	19.7279	19.4007	19.2611	19.5934	19.3997	19.2101	19.3708	18.3969	18.3276	NA	NA	18.3638	18.1683	19.1459	19.3789	19.4301	19.6608	19.2177	19.3745	19.1884	19.4198	19.727	19.7313	20.0339	19.8268	18.9778	19.1503	19.8844	19.8802	18.4102	18.7575	18.3362	18.2932
CD14_HUMAN	LKELTLEDLK	17.9	-0.464	-1.25	0.22479	1.57	0.22479	16.7774	NA	18.7828	18.6427	NA	NA	NA	NA	NA	NA	17.8048	NA	17.4942	17.8152	NA	NA	NA	NA	16.5405	NA	17.7666	17.8682	17.5009	17.5006	NA	17.2908	NA	NA	18.4031	18.7375	18.3726	17.9376	NA	NA	18.4454	18.581	NA	NA	NA	NA
CD14_HUMAN	LTVGAAQVPAQLLVGALR	20.35	-0.727	-2.23	0.03163	4.95	0.03163	19.5492	19.4923	21.6723	21.5974	19.7016	19.856	20.3811	20.5458	20.8118	20.8248	21.079	21.0736	20.7049	20.4895	19.7809	19.5848	16.8891	16.7244	19.3621	19.5146	20.5151	20.492	20.7985	20.9197	20.4837	20.3459	20.8147	20.9867	21.4679	21.2807	21.0913	21.0419	20.6169	20.4653	21.6167	21.446	20.2244	20.585	19.3647	19.6175
CD14_HUMAN	SWLAELQQWLKPGLK	19.58	-0.53	-1.29	0.20305	1.68	0.20305	18.1831	17.695	21.6743	21.479	17.731	17.2618	19.2768	19.4347	20.1879	19.6696	20.7274	20.8053	19.9218	19.7905	19.1269	19.3848	NA	NA	17.532	17.6232	19.1245	19.014	19.9568	19.4605	18.9859	18.7913	20.8224	20.9767	21.0087	20.9124	20.5646	20.332	19.1991	19.0571	21.0111	20.9133	19.7405	20.3178	18.3189	18.2147
CD14_HUMAN	RLTVGAAQVPAQLLVGALR	20.16	-0.699	-2.18	0.03485	4.77	0.03485	19.2198	19.3397	21.2525	21.3111	19.6556	19.7296	20.2743	20.3607	20.4137	20.4494	20.9025	20.7216	20.3578	20.1199	19.1118	19.3838	NA	16.7401	19.1851	19.0899	20.3289	20.051	20.4994	20.6329	20.2989	20.0311	20.7235	20.7113	21.179	21.2195	20.7396	20.7366	20.1993	20.1688	21.4527	21.0999	19.8838	20.3269	19.1509	19.3511
CD14_HUMAN	AFPALTSLDLSDNPGLGER	21.93	-0.336	-1.4	0.16949	1.96	0.16949	20.9813	21.5467	22.4968	22.7856	21.8012	21.9739	22.2846	22.4133	22.2124	22.3218	22.2899	22.3445	21.9392	22.0291	20.931	21.2509	20.4667	20.296	21.4029	21.4135	22.0627	21.8719	22.212	22.1893	21.9678	22.0077	21.6984	22.2724	22.6434	22.781	22.0207	22.3778	22.1463	22.1667	22.9352	22.8473	21.4953	21.7843	21.0463	21.3774
CD14_HUMAN	VLSIAQAHSPAFSCEQVR	21.2	-0.367	-1.7	0.09761	2.88	0.09761	20.6177	20.625	22.1524	22.2505	20.7194	20.6753	21.6637	21.7475	21.4689	21.52	21.522	21.7156	21.0443	21.1803	20.3225	20.331	19.7366	19.6886	20.5568	20.8424	21.1815	21.3247	21.4677	21.6425	21.0899	20.9785	21.5784	21.5694	21.9456	21.8958	21.5453	21.6309	21.0714	21.1755	22.2759	22.2383	NA	21.1069	20.4144	20.4359
CD14_HUMAN	ITGTMPPLPLEATGLALSSLR	20.44	-0.901	-1.98	0.05456	3.92	0.05456	19.4318	19.3943	22.1265	22.2791	19.126	19.0958	20.5324	20.6354	21.0291	20.9609	21.4589	21.4175	20.7616	20.6457	19.7621	19.9155	16.8532	15.1664	19.7557	19.5323	20.5017	20.4184	21.2418	20.8244	20.1265	20.3171	21.287	21.3365	21.5828	21.8652	21.225	21.1172	20.999	20.7586	21.7211	21.7985	20.3416	20.929	19.6823	19.8243
CD14_HUMAN	GLMAALCPHKFPAIQNLALR	18.33	0.331	0.61	0.55082	0.37	0.55082	NA	NA	18.9877	18.9009	NA	NA	18.589	18.5453	NA	NA	18.2759	17.6282	NA	NA	NA	NA	NA	NA	NA	NA	17.8235	17.6377	18.4927	18.3305	17.2532	18.0539	18.2848	18.4054	19.3648	19.2332	18.7015	17.9779	18.1667	NA	19.5631	19.2284	NA	NA	NA	15.9001
CD14_HUMAN	NTGMETPTGVCAALAAAGVQPHSLDLSHNSLR	19.72	-0.079	-0.27	0.79336	0.07	0.79336	NA	NA	20.2829	20.3208	NA	NA	20.0116	NA	NA	NA	19.3721	19.6102	19.1413	NA	NA	NA	NA	NA	18.9945	NA	19.4884	NA	19.8015	NA	NA	NA	19.5025	19.7336	20.0108	20.1256	19.9918	19.5492	19.2361	19.4607	20.6014	20.3542	18.765	NA	NA	NA
CD166_HUMAN	ALFLETEQLK	18.73	-0.076	-0.46	0.64847	0.21	0.64847	19.0034	18.8779	18.9809	18.9617	18.8311	18.8839	18.4274	18.45	18.7242	18.6593	18.5775	18.2482	18.1395	18.4948	18.5572	18.7068	18.8182	18.9383	18.42	18.658	18.9264	18.9288	18.5901	18.6697	18.8225	18.8185	17.5168	NA	18.8284	18.8853	NA	NA	18.8296	19.081	19.1245	19.1063	19.0111	19.0681	18.6433	18.8358
CD166_HUMAN	SSNTYTLTDVR	17.66	-0.01	-0.05	0.96305	0	0.96305	NA	17.8349	NA	NA	18.1471	18.1918	NA	17.3553	NA	17.8285	16.9464	17.2915	NA	17.5156	17.7135	17.5239	NA	NA	17.5748	17.7772	17.7362	17.7036	17.8134	NA	NA	NA	NA	NA	NA	17.7617	NA	16.8024	17.9308	17.9103	NA	NA	NA	17.8561	NA	NA
CD166_HUMAN	LDVPQNLMFGK	19.55	NA	NA	NA	NA	NA	NA	19.5536	NA	NA	NA	NA	NA	NA	NA	NA	NA	NA	NA	NA	NA	NA	NA	NA	NA	NA	NA	NA	NA	NA	NA	NA	NA	NA	NA	NA	NA	NA	NA	NA	NA	NA	NA	NA	NA	NA
CD166_HUMAN	VLHPLEGAVVIIFK	16.97	0.018	0.05	0.96409	0	0.96409	NA	NA	17.4954	17.3409	NA	NA	NA	NA	16.3046	16.8367	16.9669	NA	16.6153	16.688	NA	17.4236	NA	NA	NA	NA	NA	NA	NA	NA	NA	NA	NA	NA	17.3698	17.229	NA	NA	16.884	16.0648	17.1079	16.5897	17.6556	17.1645	17.0793	16.6754
CD166_HUMAN	YEKPDGSPVFIAFR	18.93	0.066	0.36	0.71734	0.13	0.71734	19.2736	19.0954	19.5192	19.4514	18.8319	18.8135	18.7253	18.9365	19.077	19.0793	18.766	18.5173	18.6537	18.7559	19.0036	19.0805	18.9622	18.9701	19.0455	18.6389	19.1359	19.2857	18.6981	18.7983	18.9701	18.9374	17.6473	17.6179	19.3724	19.1112	18.0058	17.9572	19.3761	19.272	19.4146	19.4634	19.5518	19.3814	18.975	18.9067
CD166_HUMAN	QIGDALPVSCTISASR	16.86	0.03	0.1	0.91933	0.01	0.91933	NA	17.307	17.1066	16.9493	16.4665	16.8386	NA	NA	NA	NA	NA	NA	NA	NA	NA	16.3922	16.9149	17.3649	NA	16.245	NA	NA	NA	NA	NA	16.6694	NA	NA	16.2609	NA	NA	NA	NA	16.4327	17.7074	17.7158	16.7071	16.7108	NA	16.7638
CD166_HUMAN	EMDPVTQLYTMTSTLEYK	18.23	-0.33	-1.17	0.24942	1.37	0.24942	18.1991	18.3679	19.2545	19.5902	17.2475	16.9698	17.671	17.6397	18.2209	17.9176	18.5276	18.3773	18.0552	17.7541	18.4151	18.5806	17.2443	16.6654	18.4752	18.0794	18.4362	18.6444	18.3827	17.8198	17.8948	18.1263	17.7392	17.6566	18.8096	18.8728	17.0373	17.1529	19.4892	19.1318	19.2664	19.0231	18.5262	18.9827	18.1693	18.6914
CD44_HUMAN	TEAADLCK	16.72	0.438	0.99	0.33907	0.97	0.33907	NA	NA	NA	NA	NA	17.6368	NA	16.9119	NA	NA	NA	NA	NA	16.3493	NA	NA	NA	17.0673	16.766	16.8434	15.418	16.12	17.8165	17.8579	15.8996	16.4001	NA	15.7246	17.0159	17.0389	NA	NA	NA	NA	NA	NA	NA	NA	NA	NA
CD44_HUMAN	ALSIGFETCR	19.73	0.023	0.15	0.88291	0.02	0.88291	20.0931	19.9797	19.9467	19.8586	19.9382	20.0243	19.9893	19.874	19.8893	19.7897	19.5016	19.4358	19.541	19.7306	19.69	19.7267	18.9739	18.9635	20.1295	19.7526	19.7576	19.743	20.103	20.2105	19.8968	20.0272	18.9614	18.7997	20.0861	20.1289	19.2825	19.1397	19.9209	19.9712	19.5829	19.7737	19.814	19.4774	19.9469	19.7355
CD44_HUMAN	YGFIEGHVVIPR	21.98	-0.041	-0.26	0.79531	0.07	0.79531	22.4973	22.1868	22.334	22.0328	22.26	22.1065	22.2375	22.2665	21.8202	21.8183	21.862	22.0429	21.8769	21.7277	22.0106	22.0043	21.0563	20.9909	22.1615	21.9765	21.9836	21.9603	22.3538	22.5093	22.3147	22.2782	21.7914	21.3529	22.4048	22.2644	21.5635	21.4786	22.1236	21.9829	21.9483	21.9178	21.8049	21.7867	22.1774	22.0971
CD59_HUMAN	ENELTYYCCK	18.99	0.32	1.57	0.12504	2.46	0.12504	18.8552	19.092	NA	NA	19.3983	19.3828	19.2153	18.9126	19.4841	19.4985	18.4786	18.7557	19.0079	19.1311	19.2986	19.2623	19.1232	18.898	19.3767	19.5301	18.8172	18.7236	19.3494	18.9251	18.828	19.0499	17.5942	17.4303	19.2978	19.4379	18.0667	18.4089	19.5616	19.6768	NA	18.7903	NA	19.0219	18.9381	18.8875
CD59_HUMAN	FEHCNFNDVTTR	21.24	0.172	0.99	0.32717	0.98	0.32717	21.2595	21.4186	21.4995	21.7285	21.5289	21.5083	21.5384	20.8993	21.3956	21.5311	21.0946	20.9867	21.3156	21.3172	21.2074	21.1879	21.1735	21.1564	21.3258	21.4577	21.1358	21.1146	21.3504	20.8126	21.2406	21.3852	20.5897	20.277	21.4322	21.549	20.5004	20.7556	21.6624	21.6451	21.4296	21.4683	21.51	21.3418	20.9371	20.9624
CD59_HUMAN	LRENELTYYCCK	21.56	0.22	1.14	0.26117	1.3	0.26117	21.586	21.472	22.006	21.9834	21.7034	21.7068	22.0193	21.6124	21.8423	21.9952	21.5286	21.2906	21.6538	21.6118	21.6823	21.5996	21.3888	21.0805	21.7588	21.7887	21.4144	20.9966	21.6787	21.0328	21.5679	21.519	20.9519	20.6917	21.8772	21.871	20.6723	21.0406	22.082	22.0869	21.7809	21.7582	21.9175	21.6098	21.3556	21.0071
CDK10_HUMAN	NFIIHRDLK	17.23	-0.572	-1.88	0.06826	3.53	0.06826	16.4989	16.3697	NA	NA	17.2106	16.7208	17.1273	17.0635	NA	16.1549	17.677	17.5064	17.9884	17.3866	16.7844	16.8478	NA	NA	16.3591	16.1393	17.7355	17.3827	17.7154	17.8461	17.7231	17.2996	18.9782	18.9375	16.8874	16.6221	17.9617	17.7556	16.2238	15.978	17.8397	17.27	17.1924	17.7944	16.8214	17.0941
CE350_HUMAN	QAVFDLTK	20.7	NA	NA	NA	NA	NA	NA	NA	NA	NA	NA	NA	NA	NA	NA	NA	NA	NA	NA	NA	NA	NA	NA	NA	NA	NA	NA	NA	20.9672	20.4377	NA	NA	NA	NA	NA	NA	NA	NA	NA	NA	NA	NA	NA	NA	NA	NA
CECR1_HUMAN	SQVFNILR	17.46	NA	NA	NA	NA	NA	NA	NA	NA	NA	NA	NA	NA	NA	NA	NA	NA	NA	NA	NA	NA	NA	NA	NA	NA	NA	NA	NA	NA	NA	NA	NA	NA	NA	NA	NA	17.5805	17.3405	NA	NA	NA	NA	NA	NA	NA	NA
CECR1_HUMAN	LPYFFHAGETDWQGTSIDR	18.36	NA	NA	NA	NA	NA	NA	NA	NA	NA	NA	NA	NA	NA	NA	NA	NA	NA	NA	NA	NA	NA	NA	NA	NA	NA	NA	NA	NA	NA	NA	NA	NA	NA	NA	NA	NA	18.3557	NA	NA	NA	NA	NA	NA	NA	NA
CEP55_HUMAN	NQITQLESLK	16.71	0.084	0.3	0.76988	0.09	0.76988	NA	17.2583	15.5286	15.4087	NA	17.3098	16.8667	17.3659	16.6375	16.3739	16.7681	16.6586	17.0517	17.2493	NA	16.9759	17.2307	17.6609	15.6433	NA	NA	NA	NA	NA	17.5996	17.6051	16.185	16.6406	16.0676	16.0944	16.6532	16.2673	16.4667	16.7022	16.9309	16.9784	16.7831	16.4571	NA	NA
CERU_HUMAN	GEFYIGSK	21.07	-0.11	-0.58	0.56449	0.34	0.56449	20.603	NA	NA	20.0952	21.5079	NA	NA	20.7444	NA	20.8463	20.9493	20.88	NA	21.0207	NA	20.8808	21.3505	NA	21.5809	21.5242	21.4719	21.2466	21.4119	NA	21.6337	21.5872	21.6273	21.505	20.9841	21.0091	21.1229	21.3867	NA	20.4127	20.7006	20.6716	NA	20.7006	NA	20.5772
CERU_HUMAN	YTVNQCR	18.62	0.006	0.03	0.97907	0	0.97907	18.4703	18.44	NA	NA	19.1319	18.9623	18.5441	18.3744	18.2175	18.0128	18.3591	18.7811	18.4964	18.6485	NA	NA	18.7444	19.022	18.7412	18.6989	NA	18.8775	19.238	19.2186	NA	18.5992	19.8168	19.6708	18.1739	NA	19.0379	19.1106	17.4208	17.4934	NA	18.1809	18.3974	NA	18.1765	18.1854
CERU_HUMAN	QYTDSTFR	20.45	-0.08	-0.36	0.7206	0.13	0.7206	19.8391	20.0567	19.1158	19.2651	21.2517	21.1893	20.5356	20.4746	20.1843	20.1203	20.1941	20.4973	20.6013	20.6278	20.3807	20.2173	20.9477	21.0848	20.7702	20.8567	20.5941	20.8605	21.2391	21.1333	20.8703	20.8029	21.4376	21.6563	20.2397	20.1978	20.9613	21.1114	19.5577	19.5685	19.8127	20.0352	20.3376	19.8822	19.7995	19.7219
CERU_HUMAN	MYYSAVDPTK	22.01	-0.177	-0.95	0.34675	0.91	0.34675	21.7791	21.7087	21.3162	21.2115	22.4646	22.3398	22.0098	21.5566	21.6601	21.7217	21.7856	21.8223	22.0818	22.0055	21.8564	21.8148	22.3624	22.0249	22.4764	22.4234	22.4428	22.1781	22.5678	21.9082	22.7145	22.6625	22.6903	22.5175	22.0445	22.074	22.1808	22.3538	21.4557	21.4689	21.7891	21.7413	21.8254	21.5789	22.0101	21.7533
CERU_HUMAN	IYHSHIDAPK	19.87	-0.262	-1.19	0.23918	1.43	0.23918	19.6641	20.0144	19.2155	19.1121	19.8041	19.6654	20.1985	20.0718	19.4688	19.3142	19.7442	20.053	19.8338	20.0213	19.2174	19.705	19.9492	19.4268	20.2372	19.9877	20.0976	20.2928	19.9577	20.028	20.3957	20.7379	21.2447	20.8343	19.7193	19.6607	20.2097	20.1677	19.1069	18.9645	19.9404	19.9458	19.5634	19.6433	19.4176	20.016
CERU_HUMAN	DIFTGLIGPMK	22.27	-0.228	-1.18	0.24484	1.39	0.24484	22.4156	22.2242	21.5791	21.6169	22.5868	22.4692	21.7725	21.9288	21.8406	21.8899	22.4005	22.3407	22.3968	22.2996	22.1033	22.0688	22.2287	21.8494	22.7017	22.3869	22.7364	22.5578	22.5663	22.5878	23.1531	22.8433	23.2422	23.2328	22.4913	22.3745	22.6391	22.5772	21.1097	20.9676	22.4212	22.0706	21.8184	22.0859	22.1106	22.0668
CERU_HUMAN	EYTDASFTNR	20.79	-0.134	-0.85	0.39947	0.73	0.39947	20.6183	20.6716	19.8467	19.8746	21.2644	21.2514	20.7923	20.6688	20.5614	20.5474	20.5769	20.5911	20.7393	20.747	20.5334	20.4681	21.0698	21.1448	21.3072	21.2724	21.0806	21.1922	21.3362	20.9377	21.0935	21.117	21.4275	21.5592	20.6468	20.6105	21.0835	21.1566	20.3207	20.326	20.4025	20.4789	20.4517	20.3772	NA	20.8086
CERU_HUMAN	DDEEFIESNK	21.41	-0.016	-0.08	0.93595	0.01	0.93595	20.9836	21.4374	20.199	20.572	22.0548	22.0506	21.4611	21.1441	21.2916	21.3342	21.0812	21.263	21.4506	21.5023	21.2743	21.0399	21.9617	22.1451	21.8632	21.9901	21.7372	21.8438	21.7259	21.5119	21.7034	21.9101	21.9431	22.0292	21.128	21.317	21.6151	21.8971	20.6634	20.8621	20.9419	21.1793	20.9519	20.9969	21.1993	21.2617
CERU_HUMAN	EYTDASFTNRK	18.07	-0.043	-0.17	0.86497	0.03	0.86497	NA	NA	NA	NA	18.457	18.2384	18.0363	18.0291	17.4532	17.5039	NA	18.1013	18.1332	18.0086	17.5832	17.6505	18.4136	18.1877	18.0115	17.8436	17.6498	17.7627	18.2976	18.3133	18.321	18.3297	19.4859	19.4061	17.5697	NA	18.7312	18.4887	16.7638	NA	NA	NA	NA	17.308	NA	NA
CERU_HUMAN	GAYPLSIEPIGVR	22.78	-0.154	-0.84	0.40705	0.7	0.40705	22.8185	23.0915	21.7304	21.5882	23.3106	23.3362	22.7331	22.8348	22.4647	22.3225	22.6989	22.5373	22.7338	22.8918	22.4892	22.4366	23.143	23.3363	22.8968	22.6663	23.0962	23.1805	23.2062	23.2753	23.4157	23.4921	23.5762	23.6656	22.5158	22.6161	23.163	22.9389	22.081	22.156	22.475	22.5401	22.124	22.3191	22.7113	22.5863
CERU_HUMAN	QSEDSTFYLGER	20.74	-0.025	-0.11	0.91328	0.01	0.91328	20.8098	20.917	19.3124	19.7838	21.3228	21.3824	20.834	20.9704	20.4839	20.3986	20.5392	20.6428	20.6852	20.8475	20.4374	20.4044	21.153	21.346	20.9703	21.2215	20.8655	21.1619	21.3484	21.4486	21.1768	21.2126	21.8144	21.9636	20.4168	20.4086	21.1403	21.3219	19.7665	19.8203	20.0117	20.2034	20.1703	19.8168	20.307	20.5811
CERU_HUMAN	DIASGLIGPLIICK	23.01	-0.507	-3.57	0.00093	12.75	0.00093	22.4992	22.6102	22.039	22.1167	22.8936	22.9393	22.715	22.7352	22.7001	22.8185	23.1454	23.1038	23.0901	23.0409	22.75	22.6968	22.6214	22.4519	23.1525	23.0419	23.7392	23.5962	22.9713	22.9362	23.6761	23.8586	23.7769	23.8363	23.1537	23.1205	23.2924	23.1919	22.8562	22.7694	23.5081	23.2536	22.9194	23.0217	22.847	22.9847
CERU_HUMAN	EVGPTNADPVCLAK	22.07	-0.291	-1.76	0.08519	3.11	0.08519	21.724	21.7622	20.8491	20.9437	22.2748	22.3451	22.0995	22.164	21.68	21.6733	21.9183	22.0962	21.9584	22.1441	21.7462	21.6404	22.3187	22.5618	22.2501	22.4144	22.3587	22.6124	22.2508	22.3533	22.4736	22.7338	22.7916	22.8053	21.9017	21.7792	22.2468	22.3754	21.8123	21.8404	22.3914	22.3373	21.8524	21.6207	21.8707	21.9667
CERU_HUMAN	ALYLQYTDETFR	22.75	-0.244	-1.26	0.21312	1.6	0.21312	22.8765	22.9416	21.6404	21.3818	23.0862	22.9265	22.8361	22.8526	22.5409	22.5104	22.8512	22.7357	23.013	22.8814	22.6882	22.4385	22.3091	22.2938	23.0166	22.8314	23.1164	23.0746	23.1128	23.1794	23.4615	23.4056	23.7801	23.6565	22.6792	22.2721	23.4989	23.4129	22.1618	21.9697	22.3506	22.3239	22.2798	22.1325	22.8752	22.779
CERU_HUMAN	VNKDDEEFIESNK	19.41	-0.135	-0.46	0.64517	0.22	0.64517	19.2332	19.5891	17.6866	17.6082	20.1284	20.1806	20.0327	19.7851	18.4244	18.6098	19.2698	19.2249	19.3572	19.6383	18.9922	18.9182	20.2357	20.2712	19.378	19.407	19.3737	19.5328	20.4125	20.3043	20.0349	20.1374	20.9152	21.0599	18.858	18.7772	19.9837	20.3223	NA	18.3535	19.2025	19.2601	NA	18.4755	18.2078	18.3211
CERU_HUMAN	DLYSGLIGPLIVCR	22.24	-0.619	-3.62	0.00079	13.14	0.00079	21.7251	21.7652	21.6515	21.746	21.7354	21.8795	21.7226	21.7947	21.9804	22.0027	22.5048	22.5654	22.4935	22.35	22.0789	22.0315	21.0414	20.799	22.5464	22.2713	22.8777	22.7156	21.9096	22.0554	22.8149	23.0324	23.2289	23.1816	22.5202	22.4018	22.6064	22.4791	22.2696	22.2282	22.9225	22.6807	22.2581	22.5305	22.0943	22.2595
CERU_HUMAN	RQSEDSTFYLGER	20.53	-0.177	-0.71	0.48489	0.5	0.48489	NA	NA	NA	NA	NA	NA	NA	NA	20.4643	20.4056	NA	20.7079	20.5054	20.625	20.4551	NA	21.0638	20.5161	19.5447	19.5858	20.5373	20.8122	20.0265	20.0387	20.9566	20.7064	20.7134	20.8885	20.2891	20.4455	20.6049	20.7696	NA	NA	21.0573	21.0995	21.1057	20.4545	NA	20.0406
CERU_HUMAN	VDKDNEDFQESNR	19.27	-0.416	-1.24	0.2373	1.54	0.2373	NA	18.2304	NA	NA	NA	19.629	NA	19.165	NA	NA	NA	NA	NA	18.9139	NA	18.6022	NA	NA	19.5286	19.5744	NA	19.0271	19.6865	19.7226	NA	NA	NA	NA	NA	NA	19.5628	19.5438	NA	NA	NA	NA	NA	NA	NA	NA
CERU_HUMAN	QYTDSTFRVPVER	18.54	-0.415	-1.27	0.2273	1.61	0.2273	18.1371	18.3362	NA	NA	18.6759	18.7843	18.537	18.4419	NA	NA	NA	NA	NA	17.7354	NA	NA	NA	NA	NA	NA	NA	NA	NA	18.4142	NA	NA	19.1317	19.2939	NA	NA	18.5089	18.5321	NA	NA	NA	NA	NA	NA	NA	NA
CERU_HUMAN	AGLQAFFQVQECNK	17.45	-0.448	-0.97	0.34205	0.93	0.34205	17.5044	17.5369	NA	NA	17.6868	17.069	17.3993	16.8117	NA	NA	NA	17.3396	17.9609	17.2636	NA	16.4304	16.2915	16.146	18.3072	17.0669	17.5855	17.5314	18.5143	17.9291	18.1445	17.9566	19.3329	18.759	17.1556	NA	18.0944	17.5392	NA	NA	NA	16.5261	NA	NA	16.9929	15.8606
CERU_HUMAN	KALYLQYTDETFR	18.69	-0.263	-1.07	0.2942	1.14	0.2942	18.1919	18.1073	NA	NA	18.8901	18.9112	18.6537	18.7462	18.0733	NA	18.7284	18.9593	18.5352	18.7867	18.1028	18.3923	18.279	18.0868	NA	NA	18.7872	18.7349	19.137	19.311	19.2352	19.1952	20.2184	19.7244	18.5681	NA	19.1535	19.3025	17.7248	NA	18.814	18.7217	18.142	18.347	17.4778	NA
CERU_HUMAN	NNEGTYYSPNYNPQSR	20.55	0.003	0.01	0.99012	0	0.99012	20.5089	20.4611	19.4091	19.5951	21.1518	21.0057	20.934	20.6025	20.3669	20.3169	20.271	20.4682	20.5538	20.7834	20.3925	20.2306	20.9338	20.8891	21.0068	21.091	20.6253	20.7437	21.1168	20.8431	21.1115	21.0819	21.5393	21.2977	20.0645	20.2854	21.0995	21.2641	19.6154	19.7547	19.8498	20.195	19.9567	19.9373	20.1825	20.3573
CERU_HUMAN	TTIEKPVWLGFLGPIIK	23.24	-0.607	-2.43	0.01973	5.89	0.01973	23.2828	23.0974	22.9366	23.0693	22.9572	23.0686	22.8804	23.0786	23.1738	23.1423	23.5987	23.6279	23.6014	23.4245	23.0383	23.1057	21.0239	20.3286	23.2384	23.0016	23.5309	23.3848	23.5479	23.5422	23.6889	23.7065	24.8188	24.7983	23.5512	23.4128	24.0038	23.7922	22.8762	22.8048	23.5716	23.3473	23.1156	23.3613	22.8775	23.0763
CERU_HUMAN	AEEEHLGILGPQLHADVGDK	21.07	-0.212	-1.22	0.23117	1.48	0.23117	20.8672	21.0148	20.137	20.2979	21.1154	21.3602	21.2362	21.4028	20.9078	20.7526	21.0811	20.8026	20.8237	20.985	20.6275	20.5691	21.0828	21.185	21.5623	21.491	21.5354	21.6531	21.3413	21.2876	21.6324	21.6064	22.2356	22.017	20.9217	21.0387	21.2679	21.3181	20.2625	20.3244	21.0837	21.0832	20.741	20.5895	20.7405	20.8609
CERU_HUMAN	NLASRPYTFHSHGITYYK	20.93	-0.251	-0.78	0.43773	0.61	0.43773	21.5188	21.0547	19.2866	19.3443	21.3379	21.0428	21.4522	21.4589	20.2352	20.2881	20.5734	20.9249	20.9828	20.7562	20.5236	20.7515	21.193	20.6958	21.4527	21.1542	21.4594	21.3041	21.6124	21.509	21.779	21.647	22.587	22.6728	20.6079	20.465	21.6637	21.4843	19.7044	19.8931	20.5635	20.7057	19.2472	20.6248	20.8218	20.6863
CERU_HUMAN	LISVDTEHSNIYLQNGPDR	22.35	-0.157	-0.94	0.35286	0.88	0.35286	22.3629	22.4879	21.486	21.7951	22.5591	22.6615	22.489	22.6017	22.0474	22.0494	22.3423	22.1785	22.3208	22.4544	21.9497	22.0284	22.2219	22.3232	22.4768	22.6155	22.5783	22.6123	22.5616	22.709	22.7645	22.9282	23.3817	23.2841	22.2208	22.1664	22.6943	22.7351	21.5564	21.8847	22.2492	22.2013	21.9315	21.7228	22.0693	22.3473
CERU_HUMAN	MHSMNGFMYGNQPGLTMCK	21.68	-0.334	-1.4	0.16848	1.97	0.16848	21.8724	21.238	21.6468	21.6167	21.1322	20.7285	21.5576	21.5767	21.2191	21.0617	21.8395	21.8073	21.7007	21.3394	21.482	21.4973	21.3558	20.5894	22.4651	22.5028	22.2078	21.8915	22.4297	22.1871	22.1029	21.7447	23.2315	23.1161	21.8914	21.8399	21.9192	21.7898	21.1058	21.0743	21.4462	21.4651	21.1405	21.1411	21.7386	21.4549
CERU_HUMAN	KAEEEHLGILGPQLHADVGDK	22.91	-0.204	-1.19	0.2399	1.42	0.2399	23.0585	22.9798	21.7014	21.9592	23.1486	23.1831	23.2024	23.2297	22.6266	22.6035	22.9307	22.7268	22.8911	22.7718	22.4874	22.4983	23.0478	22.8806	23.1167	23.1654	23.2389	23.2251	23.2696	23.259	23.3929	23.3964	24.1313	24.0349	22.7129	22.7335	23.2852	23.1929	22.1659	22.1184	22.7819	22.7445	22.489	22.4938	22.8551	22.7711
CERU_HUMAN	KLISVDTEHSNIYLQNGPDR	19.31	-0.065	-0.26	0.79828	0.07	0.79828	19.3168	19.4068	NA	NA	19.7095	19.8274	19.6588	19.8811	18.2274	18.8025	19.2454	19.4196	18.7878	19.0676	18.7331	18.723	19.6533	19.4105	18.9663	19.4823	19.4122	19.5174	19.9469	19.9607	19.9206	19.8357	20.3442	20.6229	18.7801	18.6192	19.3377	19.5471	NA	18.4257	NA	NA	NA	18.4826	18.8632	18.7198
CERU_HUMAN	MYYSAVDPTKDIFTGLIGPMK	18.17	-0.395	-0.82	0.41452	0.68	0.41452	18.227	18.356	18.1182	18.2834	18.4801	18.2533	18.329	18.5526	17.5423	17.554	18.1549	18.0906	18.772	18.5552	17.5594	17.8367	16.9428	14.9531	17.9257	17.9171	18.1991	17.6631	19.6895	19.3344	19.1089	18.7541	20.7475	20.9249	18.4469	18.3799	19.1297	19.2312	NA	15.5682	18.4938	18.2655	16.9194	17.6576	16.4057	17.4076
CERU_HUMAN	HYYIGIIETTWDYASDHGEK	20.41	-0.388	-0.93	0.35991	0.86	0.35991	21.0936	20.2429	19.4526	19.5104	20.4182	20.2706	21.6343	20.5571	20.2453	20.3169	20.732	20.4165	20.4398	20.2318	21.6011	20.522	18.0578	17.3127	21.0687	20.2592	20.4051	20.0862	21.6061	20.5741	21.0413	20.478	21.7786	21.5228	20.0778	20.3535	20.9679	21.0582	20.2595	19.8241	19.8256	19.7967	21.1422	20.4033	20.8407	20.0981
CERU_HUMAN	MYSVNGYTFGSLPGLSMCAEDR	20.3	-0.698	-1.42	0.16401	2.01	0.16401	19.6894	20.0899	20.1619	20.0721	19.436	19.0548	19.827	20.0836	20.1033	20.2511	20.8279	20.8714	20.7376	20.3861	20.2187	20.6112	18.8149	15.8446	21.0778	20.7821	20.7099	20.3775	20.785	20.4315	20.7776	20.4951	22.1301	22.5516	20.7465	20.6144	20.8775	20.9793	20.3518	20.2029	20.3411	20.093	19.6638	20.0875	19.9102	20.7732
CERU_HUMAN	MFTTAPDQVDKEDEDFQESNK	21.89	-0.136	-0.83	0.41342	0.68	0.41342	22.1874	21.9535	21.1615	21.1156	21.986	21.9902	22.1693	22.2622	21.4812	21.5098	21.8052	21.6122	21.7443	21.7815	21.5405	21.531	22.0848	22.016	22.1819	22.2854	22.1024	22.1661	22.2252	22.3014	22.4683	22.3431	23.0477	22.956	21.7134	21.6613	22.1486	22.165	21.187	21.1545	21.7374	21.7333	21.2441	21.3281	21.7495	21.6858
CERU_HUMAN	KAEEEHLGILGPQLHADVGDKVK	18.5	-0.203	-0.49	0.62521	0.24	0.62521	19.0495	18.6194	16.292	NA	19.2742	18.9689	18.9599	19.0048	NA	NA	17.6145	17.8004	18.5987	18.3536	NA	17.6932	18.7947	18.5974	17.8669	NA	NA	17.9577	19.22	19.4926	19.2097	18.9221	20.6553	20.4157	17.5449	NA	19.4743	19.1574	NA	NA	17.3609	17.0235	16.6568	NA	17.8043	NA
CERU_HUMAN	GPEEEHLGILGPVIWAEVGDTIR	21.91	-0.878	-1.26	0.21522	1.58	0.21522	21.827	21.6029	21.8834	21.6361	21.705	21.2685	21.7444	21.8916	22.0094	21.6571	22.637	22.5782	22.475	22.2107	21.9512	22.144	19.3346	14.6548	22.2376	21.9139	22.2261	22.0004	22.4009	22.1277	22.1933	22.2216	23.9119	23.8964	22.4481	22.2934	22.7998	22.634	21.8259	21.5225	22.1662	22.0313	21.8291	22.1882	22.0169	22.18
CERU_HUMAN	SGAGTEDSACIPWAYYSTVDQVK	20.78	-0.373	-1.77	0.08373	3.14	0.08373	20.7226	20.6017	19.1432	19.713	20.9722	20.5737	20.6975	21.0318	20.2997	20.263	20.6606	20.7838	20.6383	20.623	20.5024	20.6694	20.7811	20.3454	21.4585	21.4269	21.5527	21.6669	20.8922	20.7057	21.6396	21.3667	21.1576	21.5385	20.5718	20.7913	21.1109	20.8761	20.4445	20.3948	20.864	20.8417	20.3561	20.5758	21.1117	20.9127
CERU_HUMAN	HYYIGIIETTWDYASDHGEKK	19.27	-0.5	-0.92	0.3644	0.84	0.3644	20.3787	18.3703	18.1701	17.764	19.5588	19.4965	20.7323	19.386	18.7957	18.8304	19.7296	19.1235	19.4317	19.069	20.0415	18.9854	16.2252	NA	19.489	18.7148	19.131	18.8345	20.6906	19.2446	19.7787	19.3542	21.1937	21.0186	19.0359	18.7833	19.9695	20.107	18.9316	18.1097	19.3405	18.7855	19.8536	18.6776	19.0061	NA
CERU_HUMAN	SVPPSASHVAPTETFTYEWTVPK	21.98	-0.194	-0.96	0.34513	0.91	0.34513	22.2488	22.2243	20.7834	20.8739	22.1414	22.0412	22.1796	22.4447	21.6872	21.4677	21.7463	21.9466	22.1095	22.1204	21.623	21.8953	21.8313	21.5692	22.3841	22.33	22.416	22.4687	22.3248	22.4768	22.7673	22.7087	22.7001	22.9604	21.6935	21.7714	22.5532	22.42	21.1284	21.3854	21.492	21.566	21.0866	21.5002	22.1598	21.9495
CERU_HUMAN	TYCSEPEKVDKDNEDFQESNR	19.06	-0.851	-1.04	0.30528	1.09	0.30528	NA	20.1347	16.2968	NA	20.1332	20.4964	18.523	19.6401	19.2553	15.7498	18.8159	NA	19.0851	18.7731	NA	15.9528	19.8806	20.0103	17.2547	19.3972	19.5003	19.4455	20.5463	20.1034	NA	19.9458	20.5436	20.5289	18.2883	17.9585	19.7505	19.8497	NA	NA	NA	NA	17.8023	NA	NA	19.1229
CERU_HUMAN	GVYSSDVFDIFPGTYQTLEMFPR	20.82	-0.683	-1.37	0.17822	1.88	0.17822	20.4687	20.381	21.1808	20.9954	20.1211	18.8048	20.1207	21.1463	20.6893	20.6568	21.3944	21.3137	21.4299	20.9887	20.6075	21.5624	16.5015	NA	21.1066	21.1205	21.0363	20.0652	20.7265	21.2202	21.2272	20.3012	22.7536	23.3685	21.3819	21.4603	21.2102	21.3312	20.0713	20.4742	20.3496	20.2394	20.0914	21.0901	21.2743	21.6495
CERU_HUMAN	EFYLFPTVFDENESLLLEDNIR	17.79	-0.605	-0.74	0.46944	0.55	0.46944	NA	NA	17.9094	16.6151	16.0808	NA	NA	NA	17.8241	NA	18.4907	17.4051	17.8403	NA	NA	NA	NA	NA	NA	NA	NA	NA	NA	NA	17.4005	NA	20.3072	20.007	18.6181	17.937	17.4437	18.1371	NA	NA	16.9126	15.773	NA	NA	NA	NA
CERU_HUMAN	HYYIAAEEIIWNYAPSGIDIFTK	18.14	-0.449	-0.7	0.49108	0.48	0.49108	18.3939	16.9435	18.7054	17.3442	17.212	15.5574	18.5116	17.3191	18.489	17.8249	18.8824	18.466	18.658	17.4455	18.9942	18.3865	NA	NA	17.7035	17.4125	19.2701	18.7519	19.5038	18.4482	18.4931	17.3092	21.1184	20.8309	18.8766	18.5372	18.9628	18.6066	16.21	14.8557	17.6193	16.8227	17.5946	17.7505	19.2495	18.2273
CERU_HUMAN	ERGPEEEHLGILGPVIWAEVGDTIR	22.34	-0.468	-0.8	0.42782	0.64	0.42782	22.4467	22.1454	22.8116	22.5703	22.4309	22.3108	22.2848	22.3864	22.7804	22.7355	22.3109	22.1553	22.2767	22.9467	22.6347	22.9469	19.7252	16.6594	22.9206	22.5675	22.7857	22.3858	22.9192	22.7445	22.9016	22.5538	24.4972	23.3037	21.9459	21.7984	23.739	23.4801	22.7381	22.307	20.5521	21.7971	22.6571	21.756	22.1589	22.3938
CERU_HUMAN	WYLFGMGNEVDVHAAFFHGQALTNK	18.79	-0.379	-0.7	0.48629	0.49	0.48629	18.6458	18.3456	19.3225	18.1408	18.6672	19.0053	18.6789	17.9643	18.7929	18.7988	19.3062	18.5793	19.4368	18.2902	19.6995	18.6808	17.6371	16.94	18.2383	18.9245	18.9092	17.838	19.9797	19.0579	19.0482	17.3452	21.2228	20.7449	19.6224	19.0445	20.0905	19.474	18.3852	16.7564	19.0099	18.3516	19.0967	18.5713	18.3885	18.7413
CERU_HUMAN	DVDKEFYLFPTVFDENESLLLEDNIR	18.4	-0.353	-0.92	0.36414	0.84	0.36414	17.9718	17.6943	18.5289	17.5162	17.6059	16.7885	17.9847	18.168	18.2416	17.8179	18.9536	18.7207	18.9419	18.5649	18.234	18.5568	NA	NA	18.8784	18.6585	18.6302	17.6998	18.3516	18.4184	18.513	17.9903	20.7403	20.838	18.8088	18.6472	19.1823	18.9243	17.7566	16.7917	18.284	17.8209	17.6825	18.2574	18.997	18.9683
CERU_HUMAN	QKDVDKEFYLFPTVFDENESLLLEDNIR	20.42	-0.496	-1.68	0.10118	2.82	0.10118	20.176	20.0044	19.9597	19.8773	20.2974	20.2116	20.3031	20.4237	20.0482	19.982	20.7785	20.8728	20.8771	20.6944	20.4925	20.6129	17.5709	NA	20.6578	20.4857	20.3929	19.827	21.1019	20.8123	20.5229	20.2333	22.3333	22.3778	20.5471	20.5707	21.1879	21.2993	19.6272	19.6819	20.5524	20.1836	20.0997	20.5237	19.9425	20.3807
CERU_HUMAN	GDSVVWYLFSAGNEADVHGIYFSGNTYLWR	15.15	-0.315	-0.37	0.7209	0.14	0.7209	NA	NA	NA	NA	NA	15.5525	NA	NA	NA	NA	NA	NA	NA	NA	NA	NA	NA	NA	NA	13.7922	NA	NA	13.97	NA	14.3046	NA	17.3426	17.169	NA	14.2399	15.0339	14.9376	NA	NA	NA	NA	NA	NA	NA	NA
CERU_HUMAN	RDTANLFPQTSLTLHMWPDTEGTFNVECLTTDHYTGGMK	17.63	NA	NA	NA	NA	NA	NA	NA	NA	NA	NA	NA	NA	NA	NA	NA	NA	NA	NA	NA	NA	NA	NA	NA	NA	NA	NA	NA	NA	NA	NA	NA	17.8464	17.4172	NA	NA	NA	NA	NA	NA	NA	NA	NA	NA	NA	NA
CF153_HUMAN	QLVAGNSPK	11.82	NA	NA	NA	NA	NA	NA	NA	12.5048	NA	NA	NA	NA	NA	11.5583	NA	NA	NA	NA	NA	NA	NA	NA	11.3897	NA	NA	NA	NA	NA	NA	NA	NA	NA	NA	NA	NA	NA	NA	NA	NA	NA	NA	NA	NA	NA	NA
CFAB_HUMAN	VASYGVKPR	18.54	-0.66	-1.54	0.14483	2.37	0.14483	NA	17.54	NA	NA	17.9636	NA	NA	18.379	NA	NA	NA	NA	NA	NA	NA	NA	18.0986	NA	NA	17.837	18.835	18.8151	NA	NA	NA	17.6497	20.2415	19.7255	NA	NA	19.537	19.3273	NA	17.7791	NA	NA	17.8839	NA	NA	NA
CFAB_HUMAN	CLVNLIEK	19.56	-0.252	-1.18	0.24339	1.4	0.24339	19.4899	19.5927	18.7524	18.7505	19.6614	19.7467	19.5689	19.6737	18.9872	18.8412	20.0739	19.8041	19.4707	19.6319	19.6536	19.4461	19.4318	19.6588	19.1767	19.3486	20.4185	20.4717	19.5056	19.7915	19.3918	19.4551	21.0111	20.7902	19.7033	19.6574	20.7026	20.7299	19.0965	19.2207	19.0886	19.1413	19.3696	19.1767	18.4147	18.6619
CFAB_HUMAN	DISEVVTPR	20.83	-0.194	-0.89	0.37907	0.79	0.37907	20.6295	20.7466	19.4493	19.836	21.0413	21.1408	20.7976	20.7718	20.2538	20.1994	21.2501	21.5485	20.5584	20.8615	20.9025	20.8667	20.9548	21.0113	20.5804	20.8475	21.5942	21.7278	20.9326	20.7713	20.697	20.8479	21.4966	21.8529	20.8553	20.9066	21.7546	22.0119	20.4797	20.5838	20.2538	20.0119	20.6818	20.5317	19.9999	NA
CFAB_HUMAN	DNEQHVFK	15.55	NA	NA	NA	NA	NA	NA	NA	NA	NA	NA	NA	NA	NA	NA	NA	NA	NA	NA	NA	NA	NA	NA	NA	NA	NA	NA	15.1184	NA	NA	NA	NA	NA	NA	NA	NA	NA	NA	NA	NA	NA	NA	NA	NA	NA	15.9787
CFAB_HUMAN	LQDEDLGFL	20.35	-0.243	-0.84	0.4033	0.71	0.4033	19.4444	20.5898	18.9553	18.9073	20.6904	20.6177	20.0608	20.0885	19.4979	19.9269	21.2847	21.2374	20.5353	20.3359	20.3783	20.7528	20.7552	20.4684	19.9842	20.1265	21.2294	21.1741	20.115	20.0936	20.5324	20.1203	21.571	21.7141	20.423	20.7062	21.1852	21.4709	20.4352	20.2272	19.9837	19.8918	19.8081	20.1441	19.1745	19.4964
CFAB_HUMAN	ALFVSEEEK	20.01	NA	NA	NA	NA	NA	NA	NA	NA	NA	NA	NA	NA	NA	NA	NA	NA	NA	NA	NA	NA	NA	NA	NA	NA	NA	NA	NA	NA	NA	NA	NA	NA	20.0079	NA	NA	NA	NA	NA	NA	NA	NA	NA	NA	NA	NA
CFAB_HUMAN	GDSGGPLIVHK	19.38	-0.236	-1.09	0.28267	1.19	0.28267	18.8193	18.9698	18.5737	18.5881	19.136	18.9914	19.5688	19.2929	18.8252	18.6118	20.1273	20.4534	19.3695	19.4788	19.388	19.4085	19.2825	19.2573	19.4458	19.2659	19.9934	20.1521	19.2688	19.2925	19.0647	19.1202	20.829	20.7323	19.6564	19.5731	20.3466	20.3554	18.9861	19.1426	18.9286	18.9554	19.2481	19.1679	NA	18.2894
CFAB_HUMAN	DAQYAPGYDK	18.12	-0.009	-0.03	0.97975	0	0.97975	17.3851	17.0026	NA	16.9081	18.6359	18.3766	18.3174	17.8933	18.0796	17.6626	18.683	19.1998	18.2345	18.0599	18.5079	17.8433	18.3983	18.6405	18.0571	17.8653	18.6031	19.0199	18.3431	18.0962	17.1828	16.7737	19.5098	19.6925	18.1575	18.3387	19.5882	19.513	17.8055	17.9656	17.4646	17.6091	18.1873	17.2068	15.8105	NA
CFAB_HUMAN	EELLPAQDIK	22.31	-0.215	-0.96	0.34347	0.92	0.34347	22.0022	22.3118	20.847	21.4625	22.3759	22.5181	22.3052	22.3164	21.9798	21.9351	22.7286	22.6987	22.2658	22.3871	22.3082	22.2003	22.3627	22.7483	22.176	22.1959	22.8446	23.0722	22.1535	22.4732	22.1862	22.222	23.5524	23.4846	22.4583	22.4125	23.3341	23.3037	21.9876	22.1066	21.9005	21.5075	22.2303	21.8617	21.5455	21.7801
CFAB_HUMAN	ALFVSEEEKK	19.3	-0.182	-0.44	0.66454	0.19	0.66454	18.5183	19.0249	NA	NA	NA	19.1642	NA	19.2331	NA	NA	NA	20.0519	NA	NA	NA	19.1916	NA	19.3491	NA	19.0943	20.0747	NA	NA	18.7276	NA	19.2146	NA	20.8188	NA	NA	20.4506	20.6572	NA	NA	NA	NA	NA	18.8601	17.6877	18.0627
CFAB_HUMAN	GDSGGPLIVHKR	14.97	-0.526	-0.59	0.56286	0.35	0.56286	16.5587	16.0265	NA	NA	NA	NA	NA	14.1648	NA	NA	NA	NA	NA	NA	NA	NA	13.5718	NA	13.0703	NA	16.2892	15.4839	NA	NA	14.9516	NA	13.9032	NA	NA	NA	15.238	13.8502	NA	12.6013	NA	NA	NA	NA	16.8609	17.0005
CFAB_HUMAN	VKDISEVVTPR	18.71	-0.398	-1.04	0.31141	1.08	0.31141	NA	18.0812	NA	NA	NA	NA	NA	NA	NA	NA	19.0518	NA	18.4078	18.5057	18.0003	18.4225	18.4045	18.2935	NA	NA	19.1877	19.2536	NA	17.4249	18.3901	18.65	19.9807	19.6527	NA	NA	19.568	19.7299	NA	NA	NA	NA	17.9623	18.4576	NA	NA
CFAB_HUMAN	YGLVTYATYPK	20.85	-0.35	-1.82	0.07624	3.31	0.07624	20.5739	20.6304	19.7831	19.9028	20.5801	20.6546	20.6587	20.8554	20.2919	20.2766	21.5993	21.456	20.8235	20.8873	20.7225	20.8952	20.7	20.7813	20.6952	20.7841	21.5918	21.7339	20.7332	20.941	20.7259	20.737	22.1793	22.089	21.1377	21.1052	21.9292	21.9562	20.545	20.5555	20.5525	20.4643	20.661	20.7302	20.0578	20.1278
CFAB_HUMAN	LPPTTTCQQQK	17.04	-0.781	-1.94	0.05948	3.76	0.05948	14.7744	15.4944	15.3707	15.4788	16.8977	16.7622	17.3441	16.9196	16.1515	15.8045	17.5388	18.4936	16.7289	17.0177	17.4478	16.567	16.8577	17.5892	16.8923	16.8231	16.9257	17.7337	17.9436	17.9738	17.3684	17.6268	18.8757	18.9104	18.1079	18.263	18.2204	18.4603	15.9177	16.3036	17.1829	17.3185	17.5826	16.6619	15.3895	15.8071
CFAB_HUMAN	EKLQDEDLGFL	18.98	-0.426	-1.63	0.11088	2.66	0.11088	18.4675	18.7697	17.1619	17.329	18.7711	18.8099	18.9926	19.2671	18.16	17.9839	19.7923	19.8035	19.1589	19.3599	19.1014	18.9529	18.9307	19.2304	18.5228	18.8586	19.6914	20.07	18.762	19.0733	18.9296	19.0966	20.1358	20.4212	19.1441	19.2211	20.3293	20.3786	18.7633	18.9621	19.0732	18.8446	18.6428	18.7588	17.8122	17.8284
CFAB_HUMAN	LEDSVTYHCSR	20.66	-0.219	-0.95	0.34536	0.91	0.34536	20.0475	19.9826	19.5461	19.6187	20.728	20.5985	20.9768	20.9403	20.3379	20.0264	21.1959	21.584	20.6159	20.7984	20.7008	20.6268	20.6592	20.7471	20.5915	20.6103	21.1074	21.3979	20.9079	20.8876	20.4435	20.4118	21.9444	22.2406	20.807	20.827	21.5282	21.7995	20.2429	20.2462	20.1577	20.334	20.6013	20.3389	19.4478	19.6338
CFAB_HUMAN	QLNEINYEDHK	19.48	-0.223	-0.69	0.49578	0.47	0.49578	18.9077	19.3199	17.2387	17.2253	19.7068	19.7721	20.029	19.9069	18.8516	19.1318	20.1219	20.2299	19.378	19.7931	19.7204	19.5252	19.7511	19.6437	19.3262	19.7155	20.1703	20.3843	19.6639	19.6434	19.1848	19.4786	20.6161	21.442	19.2941	19.565	20.765	21.0656	18.9021	19.3114	18.5391	18.8602	19.5531	19.1501	18.0502	18.1138
CFAB_HUMAN	GTDYHKQPWQAK	15.87	-1.173	-1.93	0.10218	3.72	0.10218	NA	NA	NA	NA	NA	NA	14.9363	NA	NA	NA	NA	NA	NA	NA	NA	NA	NA	NA	NA	NA	NA	NA	NA	NA	NA	NA	16.1856	15.9802	NA	NA	16.0486	16.2216	NA	NA	NA	NA	NA	NA	NA	NA
CFAB_HUMAN	VSEADSSNADWVTK	21.1	-0.298	-1.22	0.22936	1.49	0.22936	NA	20.8449	20.1608	20.3786	21.0736	21.0945	21.3007	20.3641	20.5344	20.5863	21.5382	21.6397	21.0188	21.135	21.1872	21.0038	21.1793	21.0376	21.0279	21.0974	21.7486	21.4735	21.1667	20.4976	20.9663	20.9773	22.2288	22.0711	21.174	21.1841	22.0286	22.4154	20.7012	20.7927	20.6081	20.7551	20.9178	20.809	NA	NA
CFAB_HUMAN	DFHINLFQVLPWLK	20.65	-1.472	-1.39	0.2235	1.93	0.2235	NA	NA	20.3145	NA	NA	NA	NA	NA	NA	NA	NA	NA	19.5182	NA	NA	NA	NA	NA	NA	NA	NA	NA	NA	NA	NA	NA	NA	22.8022	NA	NA	NA	19.9754	NA	NA	NA	NA	NA	NA	NA	NA
CFAB_HUMAN	EAGIPEFYDYDVALIK	21.11	-0.599	-2.42	0.02028	5.83	0.02028	20.7294	20.9123	20.5268	20.4412	20.572	20.5945	19.8917	19.9419	20.6216	20.6847	22.2819	22.2579	21.3448	21.2086	21.1311	21.1269	20.3369	19.9591	20.7814	20.8622	21.7913	21.9024	20.8978	20.7967	21.0199	20.9497	22.9606	22.9005	21.5918	21.4986	22.5901	22.3267	21.1126	21.0167	21.2018	21.2019	20.8302	21.1183	20.0557	20.4282
CFAB_HUMAN	FLCTGGVSPYADPNTCR	21.63	-0.278	-1.31	0.19687	1.72	0.19687	21.2409	21.3259	20.8977	21.1064	21.284	21.1706	21.6656	21.7037	21.127	21.1515	22.4538	22.6227	21.511	21.6701	21.5735	21.6664	21.3418	21.2917	21.3774	21.5917	22.2179	22.3674	21.386	21.6512	21.2979	21.2342	23.1272	23.1551	21.9187	21.9078	22.6344	22.7066	21.2654	21.4984	21.3154	21.4421	21.2956	21.5792	20.5945	20.7323
CFAB_HUMAN	KEAGIPEFYDYDVALIK	21.82	-0.387	-0.99	0.32929	0.97	0.32929	21.5644	22.3759	21.0062	21.144	22.8898	21.3559	22.1455	20.9412	21.0144	21.1576	22.5878	22.5954	21.6939	21.556	22.512	21.6996	20.9556	20.7266	21.3916	21.289	22.287	22.3961	21.4232	21.5093	21.3723	22.2097	23.2225	23.35	22.1092	22.1062	23.0671	22.7438	21.5891	21.4544	21.6245	22.4782	21.9564	21.6643	21.2279	20.5504
CFAB_HUMAN	DLEIEVVLFHPNYNINGK	15.01	-0.07	-0.09	0.93473	0.01	0.93473	NA	NA	NA	NA	NA	NA	NA	NA	NA	NA	14.89	NA	NA	NA	15.0411	NA	NA	NA	NA	NA	13.8513	NA	14.7838	NA	NA	NA	16.4713	NA	NA	NA	NA	NA	NA	NA	NA	NA	NA	NA	NA	NA
CFAB_HUMAN	YGQTIRPICLPCTEGTTR	21.17	-0.283	-1.23	0.22694	1.5	0.22694	20.9673	21.1217	20.1043	20.4225	20.9082	20.9405	21.1202	21.3323	20.7422	20.7129	21.9414	22.1006	20.8779	21.1098	20.9454	20.9298	21.1404	21.3139	20.7107	21.0803	21.8445	22.0907	20.9405	21.216	20.7359	20.9149	22.7385	22.7329	21.3681	21.3945	22.272	22.2948	20.7263	20.8423	20.9594	20.9581	20.9912	20.6319	20.1226	20.4154
CFAB_HUMAN	RDLEIEVVLFHPNYNINGK	20.18	-0.476	-0.49	0.63836	0.24	0.63836	NA	NA	NA	NA	NA	NA	NA	NA	NA	NA	20.0054	19.7139	NA	NA	NA	NA	NA	NA	NA	NA	NA	NA	NA	NA	NA	NA	20.9247	20.8186	NA	NA	20.2314	19.3689	NA	NA	NA	NA	NA	NA	NA	NA
CFAB_HUMAN	AIHCPRPHDFENGEYWPR	19.89	-0.302	-0.86	0.39726	0.74	0.39726	NA	19.2969	NA	18.2696	19.4335	19.224	20.3219	20.3261	NA	NA	20.5236	20.3667	NA	NA	NA	19.7762	NA	NA	NA	NA	NA	20.1518	19.6655	19.5633	19.6757	19.4855	21.6863	21.3789	19.7484	19.5247	20.8628	20.5871	NA	NA	19.3822	NA	19.2023	NA	19.0871	NA
CFAB_HUMAN	WSGQTAICDNGAGYCSNPGIPIGTR	19.86	-0.391	-1.5	0.14171	2.25	0.14171	19.5212	19.4473	18.7041	19.3747	19.5596	19.3993	19.8333	20.1751	19.3893	19.4201	20.6797	20.7494	19.8579	19.9913	19.77	20.015	19.2113	18.7993	19.4334	19.9757	20.4195	20.6594	19.6874	19.8948	19.5571	19.5131	21.3863	21.5995	20.1575	20.2555	20.8825	21.0516	19.3352	19.7673	19.7263	20.129	19.4904	19.4333	18.9835	19.188
CFAB_HUMAN	HVIILMTDGLHNMGGDPITVIDEIR	19.33	-0.49	-0.85	0.3987	0.73	0.3987	19.1769	17.8405	19.5973	19.2307	16.688	16.0196	19.313	18.1228	19.3821	18.8851	20.8332	20.8372	19.681	19.0163	20.8177	19.6066	NA	NA	19.3227	18.8627	20.4325	19.5301	19.7002	18.654	17.7293	16.5062	21.6383	21.7388	20.2609	20.0339	20.7125	20.7401	19.6685	19.0425	19.3018	18.8709	20.0226	19.8357	18.6769	18.0837
CFAB_HUMAN	LLQEGQALEYVCPSGFYPYPVQTR	22.55	-0.533	-2.35	0.02392	5.54	0.02392	NA	22.3143	21.8158	21.9108	21.8894	21.8162	22.2116	22.3639	22.0577	22.084	23.3689	23.4956	22.6646	22.6531	22.3108	22.7171	21.1974	NA	22.0852	22.1171	23.0693	22.9133	22.1586	22.2063	22.5556	22.4776	23.7902	24.1686	23.0228	23.1267	23.5175	23.5508	22.4865	22.5426	22.3602	22.2345	22.1502	22.6366	NA	22.1652
CFAB_HUMAN	FLCTGGVSPYADPNTCRGDSGGPLIVHK	18.88	-0.687	-1.73	0.10487	2.98	0.10487	NA	NA	NA	NA	NA	NA	18.2857	18.5444	NA	NA	19.0321	18.7042	17.8547	17.952	NA	NA	NA	NA	NA	NA	19.1386	19.0845	NA	NA	NA	NA	19.9473	20.0712	18.5569	NA	19.5378	19.4155	NA	NA	NA	NA	NA	18.1488	NA	NA
CFAB_HUMAN	GHESCMGAVVSEYFVLTAAHCFTVDDK	15.99	-0.677	-0.79	0.43429	0.62	0.43429	15.127	14.9635	15.0623	14.6397	15.3645	16.3517	15.9709	13.8019	14.7139	14.8018	18.1771	17.2083	15.6526	14.6907	17.9291	15.3004	14.8905	NA	16.6546	16.346	17.3764	16.4481	16.752	14.9569	NA	NA	19.2297	18.2313	16.3674	15.7103	17.9611	17.507	16.4145	14.8907	15.3861	13.7067	17.3848	14.6053	NA	15.2444
CFAD_HUMAN	VASYAAWIDSVLA	17.74	-0.966	-2.25	0.02958	5.08	0.02958	16.9137	16.7303	18.3003	18.1879	16.1128	16.2657	16.1192	16.1712	17.4018	17.1833	18.3765	18.2634	19.0929	18.916	17.6081	18.0079	16.9831	14.3985	17.2914	16.9071	17.0534	17.1783	17.97	17.677	18.3999	18.5148	18.3442	18.6844	18.6818	18.6204	18.1447	18.1598	18.6971	18.4707	17.6461	17.7948	18.4407	18.5818	18.6568	18.8255
CFAD_HUMAN	ATLGPAVRPLPWQR	20.06	-0.409	-2.64	0.01168	6.97	0.01168	19.5885	19.2736	19.931	19.804	19.5556	19.3163	20.1061	20.1655	19.5668	19.5162	20.1033	20.0792	20.7233	20.6617	19.5545	19.6939	20.3651	20.2658	19.5027	19.393	19.9652	19.9321	20.4167	20.51	20.5178	20.5442	20.4795	20.0754	20.6732	20.551	20.1961	20.157	20.0219	19.7991	20.286	20.1571	20.1446	20.0953	20.4357	20.3866
CFAD_HUMAN	RPDSLQHVLLPVLDR	19.81	-0.382	-2	0.05224	4	0.05224	19.8632	19.5073	19.6999	NA	19.6919	19.7216	19.9756	19.9459	19.3234	19.2202	19.5031	19.5468	20.3298	20.0964	19.5699	19.117	19.7922	19.7415	19.0011	18.981	19.8728	19.7117	20.4492	20.3072	20.4487	20.2795	20.2455	20.1999	20.263	20.2287	20.2085	19.7374	19.4563	19.5005	19.6061	19.5262	19.6739	19.6873	20.6502	19.912
CFAD_HUMAN	VQVLLGAHSLSQPEPSKR	17.92	-0.161	-0.32	0.75697	0.1	0.75697	NA	NA	NA	NA	NA	NA	18.8288	NA	NA	NA	NA	NA	17.5164	NA	17.1321	NA	NA	NA	NA	NA	NA	NA	NA	NA	NA	NA	NA	18.1854	NA	17.4211	NA	NA	NA	17.8549	NA	NA	NA	18.4874	NA	NA
CFAD_HUMAN	GDSGGPLVCGGVLEGVVTSGSR	19.29	-0.302	-1.48	0.14541	2.2	0.14541	18.2303	18.8559	18.5691	18.94	19.0488	19.1992	19.2	19.4594	18.9609	18.8518	19.1174	18.9426	20.0194	20.0337	18.9081	18.9282	19.8527	19.774	18.7369	19.0731	19.1216	19.4762	19.8241	20.1515	19.7721	20.0497	19.2988	19.5234	19.6503	19.6578	19.4355	19.5048	19.083	19.3553	18.774	18.8397	19.038	18.9268	19.4996	19.7574
CFAH_HUMAN	NGFYPATR	17.34	-0.07	-0.26	0.79359	0.07	0.79359	17.3316	17.2389	16.7977	16.5109	17.7983	17.4495	17.2884	16.4337	16.8344	16.5915	17.7412	17.2748	17.4632	17.0528	17.4781	17.3407	18.1918	18.2189	17.4753	17.4998	17.4219	17.3908	17.8092	17.0358	17.8261	17.5818	17.8205	17.297	16.7809	16.7275	18.0698	17.9917	17.0239	16.4448	16.7772	16.8953	17.5098	17.1421	18.088	17.7683
CFAH_HUMAN	NDFTWFK	19.76	-0.2	-0.95	0.3457	0.91	0.3457	19.9753	19.3237	19.4201	19.2841	19.5809	19.1377	19.6492	19.7654	19.5306	19.3443	20.0621	20.0918	19.8359	19.5594	19.688	19.9097	19.9145	19.327	20.0131	19.78	19.8454	19.6618	19.9872	20.0216	20.2748	20.0462	20.3196	NA	NA	19.3079	20.464	20.3783	19.5691	19.3576	19.382	NA	19.28	19.6773	20.3958	20.1218
CFAH_HUMAN	FVCNSGYK	18.68	-0.239	-0.85	0.40672	0.72	0.40672	16.6616	NA	NA	NA	18.8815	NA	18.7568	NA	18.6336	NA	NA	NA	NA	NA	18.7646	18.636	18.949	19.1568	18.7559	18.8547	NA	18.5555	18.9432	18.8257	18.6699	NA	18.6372	18.9084	NA	NA	NA	19.0475	NA	NA	NA	NA	NA	18.6303	18.6463	18.7169
CFAH_HUMAN	LEYPTCAK	19.02	0.061	0.31	0.75882	0.1	0.75882	18.8111	19.346	18.6602	18.4207	19.3414	19.3598	19.253	19.2928	18.7336	18.7627	18.8651	18.8408	18.7542	18.9816	19.0908	19.1139	19.441	19.5231	19.1605	19.2584	18.2681	18.6891	19.3626	19.5241	19.2876	19.6346	18.4714	19.0585	18.7158	18.6243	18.9924	19.2459	18.6731	18.7335	18.4978	18.5988	19.4052	18.9242	19.4825	19.6109
CFAH_HUMAN	NGQWSEPPK	16.74	-0.222	-0.72	0.48065	0.51	0.48065	NA	16.2066	15.8051	15.7753	NA	17.2893	NA	16.9184	NA	NA	16.4735	16.3242	16.2225	16.3316	NA	NA	17.512	17.2632	NA	NA	NA	NA	16.7265	16.6934	NA	16.7446	16.6631	17.5179	16.6421	16.5163	17.9075	18.0476	16.5427	NA	NA	15.9193	16.9536	NA	NA	NA
CFAH_HUMAN	IDVHLVPDR	18.69	-0.167	-0.79	0.43175	0.63	0.43175	19.4485	19.1575	18.1997	17.794	18.402	18.2227	18.5668	18.4894	18.4222	18.631	18.9204	18.9999	18.6988	18.1752	18.326	18.406	18.6848	19.034	18.9712	18.592	18.9052	19.0066	18.3796	18.3901	19.104	19.237	19.1245	18.566	18.4154	18.1312	19.2139	18.9415	18.3954	18.3592	18.5302	18.3169	18.3882	18.5464	19.8202	19.7078
CFAH_HUMAN	IVSSAMEPDR	17.61	-0.128	-0.46	0.65043	0.22	0.65043	NA	17.1994	NA	NA	NA	NA	NA	17.1024	NA	NA	NA	NA	NA	NA	NA	NA	NA	17.7656	NA	17.8977	NA	NA	NA	17.3792	NA	17.5484	17.7512	17.8219	NA	NA	NA	NA	NA	NA	NA	NA	17.4645	NA	17.9674	17.7988
CFAH_HUMAN	EYHFGQAVR	16.71	0.123	0.42	0.67761	0.18	0.67761	17.0092	17.0861	16.6157	16.2148	NA	15.8734	16.9568	16.4975	16.3863	16.7213	17.3801	17.3349	16.9456	16.7723	16.744	16.9161	16.8654	16.4243	NA	16.7552	16.9301	16.829	NA	14.2813	17.1701	17.2985	NA	NA	16.5347	16.4613	NA	17.6111	15.7431	16.1699	16.3761	16.329	16.7986	16.9155	17.3181	17.7601
CFAH_HUMAN	WSHPPSCIK	18.41	-0.193	-1.09	0.28196	1.19	0.28196	17.7971	18.2385	18.4536	18.3687	17.6907	17.5852	18.5964	18.1308	17.9863	18.1786	18.5707	18.4956	18.5195	18.3196	18.3865	18.7077	18.4164	18.1373	18.8784	18.7191	18.383	18.4802	18.3674	18.0675	18.8324	18.8894	18.8463	18.9618	18.3227	18.2556	18.9942	18.783	17.93	17.9787	18.3014	18.2433	18.085	18.2669	19.1072	18.936
CFAH_HUMAN	EFDHNSNIR	16.18	0.19	0.5	0.62558	0.25	0.62558	NA	NA	NA	NA	NA	NA	NA	15.8914	NA	NA	NA	NA	NA	16.2423	NA	NA	NA	16.5671	16.3253	NA	NA	15.7998	NA	NA	15.9352	16.4024	NA	NA	NA	NA	NA	NA	NA	NA	NA	NA	NA	NA	16.1015	16.3219
CFAH_HUMAN	RPYFPVAVGK	20.3	-0.104	-0.43	0.67033	0.18	0.67033	20.9669	20.5116	20.2224	19.534	20.2967	19.8091	20.5603	20.4148	19.8207	19.7758	20.6062	20.4259	20.4576	19.9697	20.1764	20.1929	20.4838	20.0875	20.6018	20.0954	20.3653	20.2535	20.2453	20.0981	20.886	20.6306	20.8916	20.3567	20.171	19.8665	20.9895	20.3522	19.9957	19.7036	20.0966	19.8633	20.0796	20.3047	21.1303	20.8037
CFAH_HUMAN	SLGNVIMVCR	20.81	-0.118	-0.57	0.57018	0.33	0.57018	21.4743	21.3656	20.1151	20.2112	20.9566	20.9615	19.913	20.0702	NA	NA	20.3287	20.3901	21.0361	21.0935	20.188	20.2997	21.2897	21.2144	21.2802	21.2333	21.2246	21.268	20.0612	20.111	20.715	20.7346	21.4901	21.5196	21.0698	21.0769	21.305	21.4019	19.8433	19.9745	20.0466	19.8845	21.1464	21.1644	21.634	21.603
CFAH_HUMAN	GEWVALNPLR	16.44	-0.023	-0.09	0.92976	0.01	0.92976	17.1619	16.9261	NA	NA	16.5239	16.3356	16.5425	16.5747	16.0062	NA	16.882	16.6522	16.2824	NA	15.8867	16.3777	16.5943	16.2205	16.1923	16.3895	16.0711	15.5602	15.8065	16.1524	16.7426	16.7115	17.4358	NA	NA	NA	17.371	17.1513	15.4891	15.6914	NA	NA	15.902	16.2631	16.9663	16.8074
CFAH_HUMAN	TGESVEFVCK	20.68	0.04	0.23	0.81569	0.06	0.81569	20.4427	20.5985	20.2933	20.3747	20.7322	20.7742	20.7863	20.2175	20.5278	20.6791	20.6288	20.6215	20.6804	20.7732	20.8056	20.6736	21.155	21.1311	21.0255	21.0273	20.7172	20.5788	20.8778	20.2756	21.0036	21.0384	20.5023	20.4084	20.4533	20.5072	20.7188	21.1562	20.294	20.3707	20.3143	20.3857	20.5911	20.3628	21.2948	21.2996
CFAH_HUMAN	CLPVTAPENGK	17.68	0.29	0.32	0.75105	0.1	0.75105	15.553	18.7553	16.6456	16.6048	18.6751	18.479	18.2792	18.3095	17.1185	17.4948	17.5992	17.446	15.9432	18.2244	18.0792	18.5847	19.0312	18.9498	18.2091	18.5863	15.4031	18.4165	18.3322	13.5337	18.3962	18.6402	17.8719	17.766	16.8664	17.2301	17.8493	18.4681	16.9233	17.8631	17.0827	16.8754	17.7987	18.0905	18.6848	18.68
CFAH_HUMAN	IDVHLVPDRK	17.67	NA	NA	NA	NA	NA	NA	NA	NA	NA	NA	NA	NA	NA	NA	NA	NA	NA	NA	NA	NA	NA	NA	NA	NA	NA	NA	NA	NA	NA	NA	NA	NA	NA	NA	NA	NA	17.5758	NA	NA	NA	NA	NA	NA	NA	17.7655
CFAH_HUMAN	HGGLYHENMR	17.6	0.334	0.36	0.74145	0.13	0.74145	NA	NA	NA	NA	NA	NA	NA	NA	NA	NA	NA	17.7639	NA	NA	NA	NA	NA	NA	NA	NA	NA	NA	NA	NA	NA	NA	NA	NA	NA	NA	NA	NA	NA	NA	NA	NA	NA	NA	NA	17.4299
CFAH_HUMAN	TGDEITYQCR	20.13	0.066	0.37	0.71446	0.14	0.71446	19.7396	20.1709	19.4908	19.8227	20.3544	20.3247	20.1896	20.202	20.0141	19.9003	19.9914	20.5267	19.9873	20.1704	20.2716	20.152	20.5946	20.8006	20.2747	20.3421	19.7342	20.1106	20.2682	20.4942	20.2553	20.4818	20.1854	20.4734	19.6907	19.7252	20.5234	20.5659	19.7243	19.7888	19.4407	19.7472	20.1445	20.0044	20.1855	20.4491
CFAH_HUMAN	CTSTGWIPAPR	19.23	0.05	0.11	0.91193	0.01	0.91193	NA	NA	18.9424	18.8758	19.284	19.6176	19.3205	18.2251	19.5758	19.7003	19.4537	19.5168	19.3219	19.4994	19.4303	NA	19.1222	20.049	19.2787	18.6012	19.2122	19.3421	19.2134	18.6984	19.7821	NA	19.8344	19.7652	19.0918	19.3431	19.9412	19.9075	18.8765	18.1128	19.0449	19.0344	19.3432	16.9659	NA	19.8392
CFAH_HUMAN	WQSIPLCVEK	22.06	-0.121	-1.06	0.29713	1.12	0.29713	22.1025	22.0782	21.9365	21.9377	21.6937	21.6204	21.9141	21.9896	21.8247	21.8379	22.2021	22.3379	22.0516	21.9957	21.9102	21.9118	22.0964	22.0867	22.1658	22.2986	21.9173	21.9922	21.9909	22.1203	22.2484	22.3312	22.4804	22.3854	21.802	21.8583	22.4509	22.3907	21.6691	21.7491	21.9399	22.0458	21.9492	21.8516	22.6149	22.6154
CFAH_HUMAN	DGWSAQPTCIK	20.35	-0.031	-0.18	0.85716	0.03	0.85716	20.4453	20.63	19.7451	19.9149	20.3953	NA	20.3523	20.4835	20.0337	19.9099	20.2568	20.394	20.1829	20.1185	20.4501	20.4123	20.6561	20.7504	20.5154	20.7683	20.1509	20.4572	20.5862	20.8434	20.6255	20.7434	20.4532	20.7631	19.7481	19.8265	20.7843	20.904	19.9682	19.9446	19.6127	19.6846	20.1648	19.9528	20.9694	21.2462
CFAH_HUMAN	KGEWVALNPLR	19.76	-0.353	-1.53	0.13684	2.34	0.13684	20.3515	20.0901	19.867	NA	19.1139	18.8363	19.6805	19.7506	NA	NA	NA	NA	NA	19.5195	19.5293	19.457	19.3316	19.0052	19.7147	19.3787	19.6454	19.6245	19.2779	19.3335	20.2832	20.1959	20.5958	20.0145	NA	NA	20.4264	20.1263	NA	19.1997	19.9702	NA	NA	19.6534	20.6466	20.5036
CFAH_HUMAN	CNMGYEYSER	17.04	0.024	0.08	0.93974	0.01	0.93974	NA	16.7271	NA	NA	NA	NA	17.0654	NA	NA	16.3791	NA	NA	NA	NA	NA	17.0855	17.4828	NA	NA	17.5007	NA	16.9344	NA	NA	NA	NA	NA	17.4348	NA	NA	16.9559	17.4882	NA	16.6024	NA	NA	NA	NA	NA	16.868
CFAH_HUMAN	SCDIPVFMNAR	20.53	-0.101	-0.74	0.46238	0.55	0.46238	20.6399	20.7416	20.3587	20.1496	20.1535	20.109	20.297	20.4884	20.3396	20.2959	20.5622	20.5726	20.4094	20.3904	20.4081	20.5536	20.7084	20.7395	20.7111	20.9463	20.6509	20.5354	20.5909	20.6908	20.8678	20.8935	20.9511	20.903	20.2616	20.285	20.9104	20.6677	20.0527	20.0901	20.0804	20.1133	20.2689	20.3754	21.1688	21.2304
CFAH_HUMAN	SPDVINGSPISQK	20.5	0.039	0.22	0.82365	0.05	0.82365	20.3764	20.7895	19.9623	20.2049	20.6467	20.7297	20.6322	20.4199	20.289	20.4488	20.4187	20.6665	20.3602	20.5372	20.5388	20.387	20.8317	20.9712	20.5739	20.6843	20.2297	20.3594	20.5978	20.2494	20.9035	21.0637	20.3721	20.6835	20.1481	20.2795	20.5742	21.0342	19.9662	20.1436	20.005	20.195	20.6195	20.2329	20.94	21.0816
CFAH_HUMAN	SSNLIILEEHLK	22.19	-0.141	-1.02	0.31208	1.05	0.31208	22.2132	22.3055	22.0583	21.8267	21.9228	21.9305	22.1887	22.1937	22.0459	21.8425	22.3695	22.2548	22.1647	21.9847	22.1034	22.0017	22.1227	22.0788	22.3527	22.3527	22.2058	22.1829	22.1321	22.2026	22.4433	22.4521	22.7265	22.2971	21.966	21.938	22.6556	22.4268	21.9752	21.7302	21.9676	22.0867	22.0868	21.9477	22.8087	22.9052
CFAH_HUMAN	KGEWVALNPLRK	19.81	-0.001	0	0.9974	0	0.9974	20.5766	20.0972	19.827	NA	19.6015	19.3654	20.5887	20.2409	19.4216	19.5027	19.9148	NA	19.9238	19.6673	19.7745	19.6675	19.7848	19.3812	19.9423	19.2042	19.515	19.3828	19.8103	19.4343	20.5387	20.0649	NA	NA	19.6741	19.25	20.5433	20.0768	19.4461	19.1722	NA	19.5486	19.5425	20.1798	20.6773	20.1572
CFAH_HUMAN	EGWIHTVCINGR	21.48	-0.209	-1.49	0.14285	2.23	0.14285	21.4777	21.3683	21.5172	21.3964	21.036	20.7403	21.3124	21.404	21.3223	21.3136	21.8695	21.5592	21.498	21.3232	21.4347	21.5192	21.2373	20.939	21.7075	21.5047	21.5141	21.4307	21.4132	21.3351	21.6079	21.497	21.9023	21.7256	21.4801	21.4004	22.0443	21.8548	21.4031	21.1531	21.4733	21.423	21.4899	21.4754	22.0579	21.9732
CFAH_HUMAN	CFEGFGIDGPAIAK	19.14	-0.086	-0.55	0.58434	0.3	0.58434	19.2048	19.2609	18.5949	18.5398	19.0728	19.0725	18.8357	19.1104	19.1182	18.9226	19.3151	19.2064	19.0921	19.0785	19.0609	19.0181	19.3213	19.4404	19.4204	19.3278	19.1303	19.202	18.8546	19.294	19.563	19.462	19.4979	19.5353	18.8371	18.8274	19.7486	19.6283	18.7572	18.806	19.1024	18.9387	18.955	18.4516	19.6636	19.4865
CFAH_HUMAN	SIDVACHPGYALPK	22.63	-0.049	-0.37	0.71284	0.14	0.71284	22.8113	22.9006	22.4922	22.4172	22.3577	22.4208	22.7922	22.7062	22.385	22.3587	22.8384	22.8008	22.6283	22.5708	22.4641	22.4521	22.6274	22.7242	22.751	22.6829	22.5118	22.5579	22.3905	22.453	22.841	22.8891	23.4048	23.1911	22.4263	22.1209	22.9898	22.9319	22.2749	22.2114	22.5024	22.1864	22.7249	22.6026	23.0037	22.9482
CFAH_HUMAN	WSSPPQCEGLPCK	19.82	-0.266	-1.17	0.26046	1.36	0.26046	NA	19.6807	NA	NA	19.6337	19.3453	NA	19.4748	NA	NA	NA	NA	NA	NA	NA	19.6272	20.0542	19.7589	NA	20.1416	19.696	19.637	NA	19.6997	NA	19.9551	NA	20.1382	NA	NA	NA	20.1971	NA	NA	NA	NA	NA	NA	NA	20.2822
CFAH_HUMAN	LGYVTADGETSGSITCGK	20.06	0.004	0.01	0.98812	0	0.98812	19.8798	19.8244	21.1938	21.2575	19.7238	19.7491	20.1298	19.8629	20.3875	20.3868	19.7314	20.0522	19.6184	19.4227	20.0292	19.3408	20.4395	20.6036	NA	19.7006	20.3628	20.6249	19.9028	19.9686	19.4238	19.5652	19.0344	18.7583	20.1976	20.1567	NA	NA	20.3571	20.3519	20.7158	20.7409	20.7901	20.1223	20.0129	19.8271
CFAH_HUMAN	SCDNPYIPNGDYSPLR	21.06	-0.038	-0.3	0.76428	0.09	0.76428	21.433	21.3139	20.7566	20.7632	20.7685	20.7918	20.9968	21.1434	20.7623	20.7254	21.3168	21.2773	21.0385	21.1027	20.967	21.021	21.1361	21.157	21.1536	21.2185	20.84	20.9581	20.8141	20.9681	21.3445	21.3065	21.2914	21.445	20.8051	20.7673	21.5547	21.4567	20.7075	20.6298	20.721	20.9318	20.8311	20.9558	21.6346	21.6432
CFAH_HUMAN	AQTTVTCMENGWSPTPR	21.3	0.328	1.95	0.0586	3.78	0.0586	21.5748	21.4817	20.4843	20.6178	22.0107	21.9059	21.6486	21.8362	21.6536	21.6436	20.834	20.8028	21.1198	20.9272	21.5278	21.3715	21.7907	21.7424	22.1411	22.0807	21.3488	21.4931	21.4795	21.6793	21.3045	21.4826	21.0228	21.1479	20.8524	20.7955	21.3123	21.2836	21.349	21.2887	20.2227	20.2401	20.8909	20.7349	21.329	21.368
CFAH_HUMAN	EQVQSCGPPPELLNGNVK	19.82	-0.006	-0.03	0.97456	0	0.97456	19.6965	20.2006	19.3303	19.6522	19.8076	20.0092	19.6797	19.8702	19.8593	19.7712	19.5915	19.6399	19.56	19.7838	19.7625	19.7319	19.991	20.2878	19.9804	20.2201	19.4532	19.6729	20.6343	21.01	19.9368	19.8673	20.1773	19.9765	19.4682	19.6238	19.816	20.0636	19.2137	19.7714	19.0053	19.1914	19.5791	19.6735	20.0171	20.4025
CFAH_HUMAN	TDCLSLPSFENAIPMGEK	21.33	-0.038	-0.22	0.8271	0.05	0.8271	21.4886	21.7943	21.0516	21.4153	20.9341	20.9654	21.2242	21.2603	21.247	21.3123	21.2262	21.4725	21.1897	21.206	21.1704	21.3149	21.3244	21.0083	21.75	21.7803	21.5108	21.3466	21.3596	21.2334	21.7079	21.6118	21.2057	21.8043	21.067	21.2211	21.1725	21.4594	21.0358	21.1092	21.1122	21.0329	20.7525	20.9795	21.9641	22.2052
CFAH_HUMAN	DTSCVNPPTVQNAYIVSR	20.66	0.002	0.01	0.99035	0	0.99035	20.4799	20.5104	20.7223	20.821	20.2484	20.2965	20.5979	20.6989	20.772	20.8553	20.8521	21.0116	20.6074	20.8211	20.3623	20.7631	20.7081	20.7122	20.7349	20.6321	20.6777	20.3787	20.3168	20.5028	20.7046	20.6421	20.6918	20.9066	20.5095	20.6652	21.1471	21.227	20.3187	20.4795	20.5767	20.6281	20.5472	20.5572	20.7798	20.9179
CFAH_HUMAN	EEYGHSEVVEYYCNPR	19.47	-0.173	-0.39	0.70035	0.15	0.70035	22.326	21.191	18.6796	18.4979	19.1097	18.7415	19.8532	19.9416	19.0279	18.6586	18.9626	19.1447	19.5504	18.5581	18.4915	18.638	19.8158	19.2794	19.8872	19.341	20.6348	19.9326	18.5179	18.9856	20.7531	20.0591	19.2507	19.3491	19.0828	18.3172	19.6192	19.1881	19.6256	18.7637	18.8377	18.5177	18.5289	19.5773	22.006	21.6136
CFAH_HUMAN	IEGDEEMHCSDDGFWSK	21.16	-0.04	-0.28	0.77927	0.08	0.77927	21.5256	21.3798	20.9052	21.1086	20.8496	20.823	21.4555	21.357	20.9094	20.7427	21.2566	21.2962	20.8999	20.9463	21.2081	21.1473	21.2089	20.8784	21.4272	21.4467	21.0451	20.9427	21.2768	21.2232	21.6105	21.2226	21.5629	21.601	21.0255	20.8614	21.437	21.4781	20.8377	20.7658	20.6299	20.6749	20.9925	21.1531	21.6856	21.5513
CFAH_HUMAN	ECDTDGWTNDIPICEVVK	21.41	0.016	0.09	0.92787	0.01	0.92787	21.9629	21.9828	20.9658	21.3994	21.3484	21.3082	21.3503	21.6333	20.9237	21.231	21.7408	21.7167	21.2251	21.0956	21.4292	21.4826	21.5965	21.1857	21.3689	21.43	21.4834	21.0134	21.1184	21.0665	21.768	21.415	21.5254	21.7679	21.0995	21.3931	21.5154	21.5264	21.2976	21.38	21.0973	20.972	21.1571	21.4513	22.0627	21.9481
CFAH_HUMAN	AVYTCNEGYQLLGEINYR	19.99	-0.01	-0.05	0.96189	0	0.96189	20.5211	20.4455	19.6869	19.8618	20.1222	20.2607	20.0647	20.2648	19.6901	19.7102	20.2106	20.1905	19.8702	19.6263	20.0857	20.0408	19.7266	19.3091	20.1527	19.855	19.9879	20.0903	20.0264	19.6964	19.863	19.4337	20.0891	20.5014	19.6474	19.9719	20.5619	20.023	19.7411	19.997	19.6801	19.7092	19.8255	19.8602	20.9572	20.2307
CFAH_HUMAN	GDAVCTESGWRPLPSCEEK	21.92	0.027	0.17	0.86214	0.03	0.86214	22.2644	22.2699	21.2423	21.7678	21.6774	21.7885	22.371	22.2289	21.7563	21.6026	22.0631	22.2275	21.6737	21.8338	21.9725	21.7935	22.1032	22.0556	21.9124	22.0985	21.5636	21.7826	21.7738	21.8968	22.0653	22.2566	22.07	22.2655	21.4695	21.4518	22.312	22.3919	21.4589	21.5396	21.6585	21.543	21.9287	21.8599	22.4568	22.4184
CFAH_HUMAN	KCYFPYLENGYNQNYGR	17.67	-0.164	-0.39	0.69823	0.15	0.69823	NA	NA	18.1283	18.448	15.5087	NA	17.0377	17.3686	18.0145	17.994	17.3581	17.0026	16.6864	16.5469	18.6446	18.7345	NA	NA	18.6635	18.6665	16.6467	16.4218	18.6361	18.6721	18.5259	18.3214	NA	NA	16.8009	16.7577	NA	NA	NA	NA	16.9254	16.9306	NA	NA	18.9789	18.8038
CFAH_HUMAN	IVSSAMEPDREYHFGQAVR	21.79	-0.107	-0.77	0.44745	0.59	0.44745	22.3629	22.0961	21.58	21.7631	21.3913	21.2796	22.1207	22.0618	21.3582	21.4372	22.0005	21.9297	21.577	21.4613	21.6618	21.5439	21.8621	21.6966	21.8672	21.746	21.741	21.6952	21.667	21.7047	22.2308	22.0482	22.2777	22.3324	21.5806	21.5211	22.1013	21.9477	21.496	21.338	21.792	21.5799	21.8395	21.624	22.2636	22.158
CFAH_HUMAN	TKEEYGHSEVVEYYCNPR	19.43	0.125	0.35	0.72886	0.12	0.72886	20.3228	19.7818	NA	17.9917	19.8599	NA	20.1481	20.1924	18.7328	NA	19.5157	19.6117	19.0279	19.173	18.935	19.6485	19.7162	19.3985	19.5476	20.0078	20.0455	NA	19.5567	NA	20.0743	19.7684	19.837	20.285	18.3687	17.8534	19.9113	NA	18.535	NA	18.756	18.7509	17.6244	NA	20.8219	19.9601
CFAH_HUMAN	SITCIHGVWTQLPQCVAIDK	22.56	-0.191	-1.37	0.17661	1.89	0.17661	22.6887	22.7475	22.4517	22.5692	22.0729	21.9601	22.5062	22.736	22.5819	22.327	22.8751	22.6891	22.5403	22.5019	22.4783	22.5386	21.8959	21.7853	22.6581	22.7719	22.549	22.6213	22.4384	22.4992	22.8095	22.7699	22.8857	23.0299	22.3894	22.3468	22.9515	22.6453	22.341	22.4091	22.625	22.7178	22.3897	22.3406	23.3158	23.1304
CFAH_HUMAN	VSVLCQENYLIQEGEEITCK	22.15	-0.15	-0.86	0.39483	0.74	0.39483	21.9335	22.5193	21.8544	21.9576	21.8411	22.0329	22.0926	21.9188	21.9983	22.2589	22.4584	22.325	22.1761	22.3278	22.2395	22.2876	21.8877	21.4425	22.0474	21.9376	22.0259	21.8894	22.0692	21.9426	22.5333	22.5266	22.2843	22.5722	22.1198	22.2305	22.2059	22.5302	22.1273	21.9923	22.1762	21.7913	21.8805	21.9878	22.6894	22.9651
CFAH_HUMAN	NTEILTGSWSDQTYPEGTQAIYK	20.34	-0.144	-0.82	0.41645	0.67	0.41645	20.5803	20.6079	19.9821	20.1172	19.9423	19.8223	20.4191	20.823	20.1689	19.8403	20.702	20.5888	20.514	20.3314	20.3984	20.5368	19.8012	19.4459	20.2706	20.4546	20.1323	20.3075	20.1811	20.4694	20.7227	20.5663	20.6904	20.9045	19.9786	20.0706	20.9252	20.6509	20.0865	20.1438	19.9924	20.2021	20.1668	20.3367	21.0248	20.6823
CFAH_HUMAN	RNTEILTGSWSDQTYPEGTQAIYK	17.53	-0.228	-0.86	0.39753	0.74	0.39753	17.8894	17.6825	NA	17.1134	16.5269	NA	17.7318	17.851	NA	NA	NA	17.856	NA	17.3678	17.4086	17.5964	NA	16.2262	17.2973	17.6541	17.0554	17.35	16.7706	NA	17.8974	17.7607	18.0836	18.2886	NA	16.6664	18.1334	18.124	NA	NA	NA	NA	NA	17.1174	18.1302	18.3004
CFAH_HUMAN	SPPEISHGVVAHMSDSYQYGEEVTYK	18.71	-0.223	-0.77	0.44635	0.59	0.44635	18.118	18.0101	18.9496	18.9558	17.7635	18.522	19.4308	19.0011	18.8697	18.7649	19.2672	19.2579	17.1972	17.3127	17.9295	17.3333	19.2721	18.9673	19.7808	19.3198	19.1989	19.0508	18.4965	18.1496	18.3679	17.9858	18.6044	18.1304	18.8415	18.5882	19.2079	19.2014	18.7443	18.5802	18.9722	18.7819	19.1175	18.5174	20.1853	19.7676
CFAH_HUMAN	RPCGHPGDTPFGTFTLTGGNVFEYGVK	20.4	-0.184	-0.75	0.45904	0.56	0.45904	20.8404	20.457	19.9765	19.8857	20.5763	NA	20.9747	20.6367	19.4889	19.7943	20.7026	20.282	20.1695	19.6022	20.7188	20.3635	19.994	NA	20.7819	20.3699	20.2231	NA	20.748	NA	NA	20.6814	21.139	20.8507	20.0578	19.9325	20.5097	20.3503	20.5575	20.3103	20.1944	20.063	20.646	19.9232	21.3168	20.7408
CFAH_HUMAN	FSCKPGFTIVGPNSVQCYHFGLSPDLPICK	20.22	-0.516	-1.71	0.0941	2.94	0.0941	20.1816	20.323	20.4926	20.3502	19.3206	19.3105	19.9094	20.1163	20.2041	20.3044	20.6691	20.5373	20.3069	20.089	20.3574	20.5132	18.5867	16.9611	20.3353	20.4517	20.2765	20.1507	20.2412	20.2368	20.4299	20.1793	20.8807	21.0215	20.416	20.5147	20.5593	20.6689	20.2022	20.0742	20.6117	20.459	20.0651	20.4538	20.9931	21.205
CFAI_HUMAN	KDCELPR	14.37	NA	NA	NA	NA	NA	NA	NA	NA	NA	NA	NA	NA	NA	NA	NA	NA	NA	NA	NA	NA	NA	NA	NA	NA	NA	NA	NA	NA	12.9295	NA	NA	15.4909	14.694	NA	NA	NA	NA	NA	NA	NA	NA	NA	NA	NA	NA
CFAI_HUMAN	IVIEYVDR	19.37	-0.242	-1.41	0.16812	1.98	0.16812	19.204	19.0766	18.4361	18.3889	19.2019	19.1515	19.2868	19.1264	NA	NA	19.5732	19.6174	NA	19.3357	19.0541	18.9291	19.5232	19.6743	19.6797	19.4504	19.7026	19.7488	19.7057	19.6793	19.714	19.7114	20.221	19.9875	19.3904	19.2507	NA	19.7701	NA	18.8415	19.0269	19.0317	NA	18.8455	19.6941	19.4066
CFAI_HUMAN	VFCQPWQR	18.15	-0.685	-0.65	0.51874	0.42	0.51874	16.8689	18.4405	17.0714	17.5626	15.8423	18.2593	18.5373	18.4549	17.5561	17.5636	19.1329	19.1673	15.9788	16.1457	18.6188	18.6251	15.7045	18.6196	18.9788	19.0633	13.7501	19.258	18.8422	19.1517	19.2126	19.1991	19.3712	19.3062	19.0516	14.7551	19.4925	19.364	18.5133	18.6556	18.5361	18.0911	18.4517	18.8091	19.1691	18.9043
CFAI_HUMAN	SLECLHPGTK	18.08	-0.515	-0.7	0.52313	0.49	0.52313	NA	17.7376	NA	NA	NA	NA	NA	NA	NA	NA	NA	NA	NA	NA	NA	NA	NA	NA	NA	NA	NA	NA	NA	NA	18.545	NA	NA	NA	NA	NA	NA	NA	NA	NA	NA	NA	NA	NA	17.9598	NA
CFAI_HUMAN	HGNTDSEGIVEVK	19.16	0.086	0.28	0.78598	0.08	0.78598	NA	NA	NA	NA	NA	NA	NA	NA	18.4863	NA	19.2197	19.6594	18.8563	19.0546	NA	NA	19.199	19.277	19.3831	19.3246	NA	NA	NA	NA	NA	19.2809	19.8927	20.2246	NA	NA	19.2373	19.5186	18.2377	NA	18.6458	NA	18.8323	NA	18.5768	NA
CFAI_HUMAN	AQLGDLPWQVAIK	19.85	-0.299	-1.91	0.06393	3.64	0.06393	19.7553	19.6641	19.0994	19.0907	NA	NA	19.551	19.7419	19.2113	19.2816	20.4603	20.4414	20.0067	19.789	NA	19.652	19.7404	19.6897	19.8938	19.7084	19.9225	19.9594	20.0174	20.0997	20.2765	19.9213	20.6803	20.6918	19.9812	19.9986	20.2773	20.2275	19.5313	19.482	19.8201	19.6167	19.5673	19.5833	20.0887	20.0604
CFAI_HUMAN	RAQLGDLPWQVAIK	17.61	-0.625	-1.8	0.07886	3.25	0.07886	NA	17.3673	14.2692	14.7038	17.512	16.9822	17.8608	18.0118	17.0065	16.5671	18.5961	18.2718	18.1284	17.6388	17.3041	17.485	17.9422	17.3798	17.8384	17.5592	18.113	18.0715	18.2688	18.372	18.2326	18.1732	19.0488	18.8716	17.5091	17.2308	18.8809	18.5871	17.3097	16.9492	17.1046	17.1523	16.9542	17.5428	18.3096	17.608
CFAI_HUMAN	ADSPMDDFFQCVNGK	18.37	-0.388	-1.64	0.10807	2.7	0.10807	18.7128	18.1884	17.2616	17.3304	17.8676	17.457	18.1747	18.3749	17.5276	17.3158	18.742	18.7111	18.2036	18.2798	17.8705	18.0237	18.7546	18.8901	18.8927	18.8776	18.7529	18.8627	18.6382	18.7448	18.9117	19.0374	19.2936	19.613	18.3346	18.4899	19.1495	19.0425	17.3891	17.7297	17.744	18.1503	17.6237	18.0417	18.9539	18.7204
CFAI_HUMAN	EMECAGTYDGSIDACK	17.28	0.416	0.43	0.6742	0.18	0.6742	18.9623	18.4569	NA	NA	NA	NA	NA	NA	NA	NA	NA	NA	NA	NA	NA	NA	16.7004	16.7486	17.2165	17.0204	16.8987	16.0299	16.621	14.6953	NA	17.2803	16.9574	NA	NA	NA	NA	NA	NA	NA	NA	NA	NA	NA	19.4491	18.853
CFAI_HUMAN	TMGYQDFADVVCYTQK	17.97	-0.191	-0.51	0.61808	0.26	0.61808	NA	NA	NA	NA	NA	NA	NA	NA	NA	NA	17.906	17.6718	17.5251	NA	17.2269	NA	17.9517	NA	18.1399	NA	18.2105	NA	18.363	17.8104	18.1755	17.7239	19.217	18.9662	NA	17.2249	18.9946	18.6819	NA	NA	NA	16.7431	NA	17.0501	17.8899	NA
CFAI_HUMAN	YQIWTTVVDWIHPDLK	18.5	-0.461	-1.61	0.11513	2.6	0.11513	17.7573	17.414	18.7034	18.3954	NA	NA	17.7911	18.1279	17.825	17.5794	19.5822	19.612	18.8806	18.416	18.3767	18.6129	NA	NA	17.2744	17.5028	18.5037	18.3204	18.6472	18.4417	18.2585	17.9619	20.0918	20.133	18.9486	19.0493	19.458	19.1404	17.8509	17.6593	18.4872	18.2234	18.6751	19.1259	18.3245	18.7349
CFAI_HUMAN	YQIWTTVVDWIHPDLKR	16.47	0.104	0.1	0.91806	0.01	0.91806	NA	NA	NA	NA	NA	NA	NA	NA	NA	NA	NA	17.725	17.6026	NA	14.6884	NA	NA	NA	NA	NA	15.6124	14.5403	15.7826	15.4085	NA	14.9279	18.9306	NA	NA	NA	NA	17.5486	NA	NA	17.6954	17.2157	NA	NA	NA	NA
CFAI_HUMAN	VANYFDWISYHVGRPFISQYNV	17.22	0.058	0.07	0.94247	0.01	0.94247	NA	NA	16.9304	16.8336	NA	NA	NA	NA	NA	NA	17.6973	18.1502	17.5262	16.4752	NA	17.0756	NA	NA	NA	NA	NA	NA	15.5423	16.2095	NA	NA	18.8579	19.4076	17.4703	17.318	17.4289	17.9434	NA	NA	16.8238	16.2639	15.7298	18.0063	NA	16.6163
CFAI_HUMAN	DASGITCGGIYIGGCWILTAAHCLR	15.72	-1.048	-1.14	0.33921	1.29	0.33921	NA	NA	NA	NA	NA	NA	NA	NA	NA	NA	15.1972	NA	NA	NA	NA	NA	NA	NA	NA	NA	NA	NA	NA	NA	NA	NA	16.2448	NA	NA	NA	NA	NA	NA	NA	NA	NA	NA	NA	NA	NA
CGRE1_HUMAN	HVEPGEPLAPSPQEPQAVGR	16.84	-0.038	-0.12	0.90741	0.01	0.90741	NA	NA	17.5214	18.2311	15.7299	NA	17.3072	16.7918	17.2147	NA	16.215	16.487	17.0461	17.3061	16.4362	16.2636	16.9853	16.8571	NA	15.9285	NA	16.2734	NA	NA	NA	16.1962	NA	NA	17.1287	17.1386	NA	NA	16.9847	17.2138	16.7986	NA	17.0526	17.1676	NA	NA
CGRE1_HUMAN	RESLDPVQEPGGQAEADGDVPGPR	17.55	NA	NA	NA	NA	NA	NA	NA	NA	17.5486	NA	NA	NA	NA	NA	NA	NA	NA	NA	NA	NA	NA	NA	NA	NA	NA	NA	NA	NA	NA	NA	NA	NA	NA	NA	NA	NA	NA	NA	NA	NA	NA	NA	NA	NA	NA
CGRE1_HUMAN	VLETQDLNGDGLMTPAELINFPGVALR	16.34	0.566	0.99	0.33079	0.97	0.33079	15.7374	15.486	18.903	18.8426	13.2473	NA	15.4915	16.1292	17.0467	16.441	17.2345	16.9805	17.3572	17.1801	16.8643	17.2722	NA	NA	16.0988	15.9473	14.3019	14.7993	NA	14.4372	NA	14.0483	15.1825	15.8974	17.309	17.7975	NA	NA	17.8632	17.7561	16.6754	16.4903	14.5053	16.1464	16.8498	16.7604
CH3L1_HUMAN	FPLTNAIK	20.82	-0.038	-0.21	0.83561	0.04	0.83561	21.5299	21.3832	21.0509	20.8306	21.0807	21.0075	20.1892	20.1014	20.7506	20.8581	21.167	20.9526	20.4725	20.5376	20.3702	20.2419	21.3944	21.5058	20.2757	20.3839	21.3675	21.4728	20.3263	20.3924	21.1211	21.0841	20.4431	20.2113	21.5344	21.4727	20.3947	20.4082	21.6576	21.516	20.2978	20.2619	21.1332	21.126	20.3634	20.2616
CH3L1_HUMAN	LVMGIPTFGR	21.31	-0.034	-0.18	0.8583	0.03	0.8583	22.159	21.9061	21.5109	21.4198	21.4996	21.2957	20.6005	20.6749	21.0975	21.2576	21.7888	21.5265	21.2416	21.0839	20.8863	20.992	21.7716	21.6394	20.633	20.8338	21.9203	21.9137	20.7837	20.9357	21.7352	21.5737	20.6865	20.6731	21.9619	22.004	20.9841	20.8676	22.3069	22.1258	20.9683	20.6925	21.3813	21.4694	20.7564	20.7676
CH3L1_HUMAN	QLLLSAALSAGK	19	0.16	0.29	0.77791	0.09	0.77791	NA	19.4449	NA	NA	19.2477	NA	NA	NA	NA	NA	NA	NA	NA	NA	NA	NA	18.5323	NA	NA	NA	NA	19.2685	NA	NA	NA	NA	NA	NA	NA	NA	NA	NA	NA	19.511	NA	NA	NA	NA	NA	17.966
CH3L1_HUMAN	GTTGHHSPLFR	17.43	-0.073	-0.21	0.83143	0.05	0.83143	18.2963	17.8079	NA	NA	17.0465	NA	17.7437	17.1689	NA	NA	17.7718	18.2353	17.2173	17.177	16.6167	16.8267	17.8468	17.2281	NA	16.5311	17.956	17.9405	NA	16.5509	NA	NA	16.8499	17.3936	NA	NA	16.5483	16.9635	18.3806	18.5206	17.2555	NA	17.5541	17.7472	NA	NA
CH3L1_HUMAN	ILGQQVPYATK	20.38	-0.022	-0.12	0.90114	0.02	0.90114	20.9715	20.9582	20.3806	20.3792	20.4198	20.4929	19.8106	19.9118	20.4754	20.4112	20.6077	20.7318	19.9524	20.1706	19.8553	19.7676	21.049	21.204	19.9002	20.0312	20.8067	21.0238	19.9081	20.1362	20.5696	20.571	19.8827	19.8575	20.9617	20.9974	20.0763	20.0181	21.0734	21.1764	19.7545	19.7604	20.7638	20.5792	19.9513	20.0509
CH3L1_HUMAN	EGDGSCFPDALDR	19.82	0.323	1.57	0.12472	2.46	0.12472	20.8241	21.0384	19.5219	19.7876	20.5326	20.6103	19.4883	19.597	20.0206	19.9851	19.7906	19.8371	19.388	19.6487	19.547	19.481	20.6395	20.9355	19.3822	19.5435	20.1001	20.316	19.5872	19.8394	19.6759	19.8261	18.8705	18.8477	19.9857	20.0182	19.2433	19.3213	20.5848	20.624	18.7829	18.9386	19.9931	19.7878	19.3399	19.4663
CH3L1_HUMAN	TLLSVGGWNFGSQR	20.56	-0.188	-0.96	0.34334	0.92	0.34334	21.2371	21.1456	20.7077	20.8754	20.5677	20.4287	20.0245	19.9596	20.5286	20.6959	21.1654	21.0717	20.39	20.3605	20.2537	20.434	19.9426	19.6625	19.935	19.8789	20.9203	20.9377	20.0767	19.9004	20.8765	20.8314	20.211	20.485	21.1855	21.2787	20.2013	20.252	21.4144	21.4988	20.751	20.133	20.8397	20.8633	20.3209	20.0437
CH3L1_HUMAN	FSNTDYAVGYMLR	19.72	-0.057	-0.27	0.78563	0.08	0.78563	20.6482	20.4118	19.5424	19.345	19.7064	19.4911	19.0659	19.206	19.8389	19.5893	20.1458	20.209	19.505	19.4046	19.4184	19.175	20.057	19.842	NA	NA	20.4136	20.488	19.3736	19.2569	20.1101	NA	19.2491	19.1792	20.3853	20.4564	19.5912	19.4251	20.7264	20.6375	18.8717	18.8712	19.6743	19.8455	19.3575	19.1682
CH3L1_HUMAN	GNQWVGYDDQESVK	19.88	0.072	0.44	0.66046	0.2	0.66046	20.6124	20.54	19.7878	19.9575	19.9947	19.8988	19.5614	19.6702	19.8506	19.8091	20.1738	20.3292	19.4641	19.4067	19.4896	19.4011	20.5581	20.5311	19.617	19.6504	20.2387	20.2843	19.5737	19.6929	19.996	19.7422	19.5111	19.5769	20.1837	20.2268	19.6962	19.6306	20.6005	20.6652	19.0997	18.9788	20.1371	19.9473	19.5266	19.5626
CH3L1_HUMAN	LVCYYTSWSQYR	17.5	NA	NA	NA	NA	NA	NA	NA	NA	NA	NA	NA	NA	NA	NA	NA	NA	NA	NA	NA	NA	NA	NA	NA	NA	NA	17.2585	NA	NA	NA	17.6874	17.265	NA	NA	NA	17.7352	NA	NA	17.3914	17.6433	NA	NA	NA	NA	NA	NA
CH3L1_HUMAN	THGFDGLDLAWLYPGR	20.86	-0.511	-1.22	0.22772	1.5	0.22772	21.4241	21.1659	21.7769	21.6468	20.5552	20.0956	20.4881	20.4583	21.2632	21.3485	22.044	21.8604	21.3726	20.9289	20.6614	20.9711	17.4681	15.986	20.4103	20.1293	21.1912	20.5479	20.5619	20.4319	20.7335	20.6488	21.3821	21.3863	21.6818	21.5993	21.0117	20.723	22.1297	21.8473	21.3772	20.9868	21.4349	21.8201	20.2204	20.5511
CH3L1_HUMAN	EAGTLAYYEICDFLR	22.07	-0.418	-1.29	0.20333	1.67	0.20333	21.4531	22.1228	23.1949	23.0279	21.5093	21.2559	21.3771	21.4621	22.4336	22.4911	22.7886	22.6429	21.974	22.6032	21.9061	22.2083	20.1105	19.1329	21.8679	21.7378	21.7657	21.7675	21.8038	21.7824	21.7287	21.9596	22.3232	22.4361	23.091	22.9896	21.7568	22.0848	22.98	23.1246	22.519	22.2126	22.1936	22.9374	21.8544	22.34
CH3L1_HUMAN	SFTLASSETGVGAPISGPGIPGR	21.94	0.128	0.7	0.4897	0.49	0.4897	22.5869	22.5748	21.8309	22.2241	21.9431	22.0815	21.45	21.5247	22.1704	22.1815	22.5209	22.3462	21.8236	21.8234	21.4573	21.6654	22.3971	22.2771	21.5131	21.6053	22.4057	22.2596	21.2429	21.3366	22.1477	22.1698	21.241	21.3091	22.3743	22.4169	21.5518	21.5914	22.7538	22.9587	21.5134	21.3746	22.1017	22.147	21.4139	21.1332
CH3L1_HUMAN	ISQHLDFISIMTYDFHGAWR	15.28	0.668	0.82	0.42358	0.66	0.42358	16.0515	NA	16.8515	15.7038	NA	15.5724	NA	NA	15.3351	15.226	16.8102	15.0513	14.7331	NA	15.7883	13.4607	NA	NA	NA	NA	14.7181	NA	15.02	NA	NA	NA	NA	13.6515	16.1464	15.8065	NA	NA	15.5063	14.3144	13.5839	NA	16.4379	15.1038	NA	NA
CH3L1_HUMAN	GQEDASPDRFSNTDYAVGYMLR	17.26	-0.292	-1.03	0.31242	1.06	0.31242	NA	17.8865	NA	17.8977	NA	16.8797	16.3414	17.1161	17.1251	NA	17.5761	17.6999	16.8287	16.6727	16.3626	16.1443	17.6227	NA	NA	16.8058	17.7666	17.6206	NA	NA	17.8581	NA	16.4831	17.0518	18.1073	18.048	NA	16.7546	17.8909	18.0671	17.0681	16.6612	17.4208	17.6005	NA	NA
CHD7_HUMAN	NLLVYGWGR	13.81	0.259	0.29	0.77926	0.09	0.77926	NA	NA	NA	13.7729	NA	NA	14.5744	NA	14.4873	NA	NA	12.6101	NA	NA	NA	NA	NA	NA	NA	NA	NA	NA	NA	NA	NA	NA	NA	NA	NA	13.6018	NA	NA	NA	NA	NA	NA	NA	NA	NA	NA
CHL1_HUMAN	EVNILR	17.4	0.123	0.19	0.85159	0.04	0.85159	17.1009	17.4258	18.8438	18.2977	18.3941	16.1683	17.1735	17.6723	18.2214	17.8685	17.2061	17.9117	17.715	17.3313	17.3429	17.2955	17.587	16.8357	16.7236	16.2305	17.6439	17.0972	17.9744	14.5719	17.4226	17.5848	15.1365	17.2265	18.0346	18.2371	15.991	16.4824	17.9172	18.1804	18.5676	18.4911	NA	17.8211	17.509	17.2457
CHL1_HUMAN	VTWSTVPK	20.12	0.141	0.48	0.63273	0.23	0.63273	19.9196	19.5869	21.4062	21.1156	19.8183	19.7465	20.3566	19.679	20.3358	20.4584	19.9987	19.8217	20.2784	20.0831	20.2366	20.2936	20.7651	20.2613	19.9403	19.7925	20.1773	19.5627	20.0506	19.3957	20.1638	19.9825	18.9081	18.4138	20.893	20.6665	19.1694	19.2526	20.7903	20.6923	21.0931	20.9903	20.7269	20.5875	20.2239	19.3274
CHL1_HUMAN	VIAVNEVGR	20.62	0.043	0.19	0.84877	0.04	0.84877	20.2415	20.3721	21.6159	21.5091	20.2506	20.2349	20.7361	20.2624	20.802	21.0225	20.4365	20.368	20.6944	20.5679	20.5738	20.4069	21.0004	20.9126	20.3802	19.9976	20.5995	20.291	20.4091	19.9026	20.4728	20.3876	NA	19.5961	21.1838	21.1918	19.705	20.0437	21.2204	21.0918	21.5159	21.3674	21.229	20.8896	20.4876	20.2033
CHL1_HUMAN	TAVTANLDIR	18.64	0.05	0.15	0.88494	0.02	0.88494	NA	18.3737	18.739	18.4305	NA	NA	NA	NA	18.9838	NA	18.1119	NA	NA	NA	NA	18.3895	NA	19.5157	NA	NA	18.1806	18.4697	NA	NA	NA	NA	17.2643	NA	19.1733	NA	NA	NA	19.5187	NA	19.0963	19.063	18.4492	NA	NA	18.436
CHL1_HUMAN	GYQINWWK	18.59	-0.338	-0.95	0.35256	0.89	0.35256	18.5279	18.132	NA	19.7222	17.7984	17.0332	18.7059	18.7161	NA	18.6786	NA	NA	NA	18.3606	19.2065	19.0852	17.9952	17.249	NA	NA	18.4946	18.2981	NA	17.9981	18.4936	18.1537	NA	NA	19.2418	19.2989	NA	NA	NA	19.3342	NA	19.7705	19.1132	19.4246	18.5125	18.051
CHL1_HUMAN	IENVSYQDK	21.33	0.427	1.94	0.05928	3.76	0.05928	21.9737	22.0075	20.2648	20.3401	22.5636	22.5468	21.9501	21.9093	21.2919	21.023	20.6258	20.8606	21.1876	21.2353	21.6651	21.4459	22.3949	22.4811	21.5386	21.6061	21.138	21.3343	21.9161	21.9853	21.6343	21.6311	20.5139	20.5152	20.5621	20.5325	20.8531	20.9909	21.2725	21.1722	20.3116	20.3827	21.2765	20.85	21.7306	21.7674
CHL1_HUMAN	VEEVKPLEGR	19.32	-0.086	-0.42	0.67641	0.18	0.67641	18.869	19.2516	20.2204	20.0124	18.6872	NA	19.399	19.2406	19.4041	19.5384	18.8666	19.2087	19.261	19.1815	19.1715	19.2626	19.6067	19.4553	19.0018	18.7157	19.2281	19.3381	18.9014	18.833	NA	NA	18.3986	18.4088	19.7302	19.7401	NA	NA	19.7064	19.6892	20.2413	20.1641	19.5564	19.5363	NA	18.9742
CHL1_HUMAN	GNPEPTFSWTK	20.66	0.116	0.63	0.53127	0.4	0.53127	20.8965	20.7935	21.3792	21.642	20.3917	20.2065	20.6465	20.8512	21.0036	20.8159	20.2213	20.4023	20.445	20.4795	20.6	20.8049	21.0426	20.9181	20.2383	20.5597	20.7141	20.821	20.4712	20.6162	20.5748	20.5006	19.4263	19.4842	21.0256	21.007	19.7151	19.8313	20.9458	21.092	21.3726	21.3345	20.9314	20.9371	20.5972	20.6166
CHL1_HUMAN	GDLYFANVEEK	21.02	0.108	0.64	0.52851	0.4	0.52851	21.1572	21.1109	21.6956	21.8595	20.4917	20.6539	20.8577	20.9815	21.4643	21.3864	20.653	20.6985	20.9142	21.0634	21.0169	20.9783	21.3614	21.5708	20.7708	20.8647	21.122	21.2445	20.6296	20.8729	20.9259	20.8416	19.8945	19.975	21.3273	21.4197	20.3121	20.4383	21.3252	21.482	21.6725	21.606	21.3403	21.232	20.8419	20.8963
CHL1_HUMAN	TTVILPLAPFVR	20.69	-0.027	-0.15	0.87928	0.02	0.87928	20.7794	20.8212	21.7721	21.599	20.1296	20.1474	20.4947	20.5962	20.9229	20.9731	20.5573	20.5194	20.696	20.6182	20.6078	20.5689	20.6951	20.6445	20.2093	20.1843	20.8736	20.8846	20.1931	20.3251	20.7343	20.7236	19.896	19.8837	21.2552	21.1522	19.9676	19.7671	21.343	21.145	21.6058	21.4139	20.7876	20.9601	20.4994	20.6691
CHL1_HUMAN	DGNPFYFTDHR	21.07	0.068	0.38	0.70382	0.15	0.70382	21.1412	20.9245	22.0558	21.9534	20.5936	20.4329	21.058	21.2525	21.307	21.289	20.9266	20.8508	21.0286	21.0048	21.0188	21.0804	21.321	21.2636	20.8264	20.6665	21.0856	21.0922	20.6051	20.8139	20.8718	20.7371	20.0797	20.1071	21.611	21.5385	20.374	20.3425	21.5684	21.5013	21.9782	21.8172	21.5322	21.4936	20.7729	20.706
CHL1_HUMAN	SMEQNGPGLEYR	17.36	-0.161	-0.56	0.5826	0.31	0.5826	16.5348	16.6291	18.6611	18.6187	16.76	NA	17.1109	16.4516	17.7134	17.5362	NA	16.7332	16.8377	NA	17.219	17.102	17.9498	17.6435	NA	16.9432	17.2004	NA	NA	NA	NA	16.8516	NA	NA	18.2457	18.1916	NA	NA	17.6616	18.0337	17.2872	17.5261	NA	17.0837	NA	16.7867
CHL1_HUMAN	LHMLELHCESK	18.43	-0.733	-1.76	0.09429	3.1	0.09429	18.0595	NA	NA	19.1913	17.2625	NA	NA	17.5743	18.3557	18.6237	NA	17.2937	NA	NA	NA	17.6836	18.2514	NA	NA	NA	18.6403	17.6954	17.6525	NA	18.4135	NA	NA	NA	19.0377	18.8494	NA	NA	NA	18.8661	20.1814	20.1153	NA	NA	NA	NA
CHL1_HUMAN	NDYCCFAAFPR	19.66	-0.175	-0.87	0.38817	0.76	0.38817	19.7021	19.6569	20.4912	20.3278	19.4388	19.1527	19.3963	19.6271	19.8	19.7255	19.2067	19.3448	19.6953	19.5936	19.3974	19.6331	19.6094	19.5774	19.0305	19.066	19.7398	19.9798	19.3027	19.5869	19.5449	19.5806	18.8467	18.61	20.1548	20.2052	19.0364	18.8431	20.2491	20.1985	21.0364	20.9776	20.1459	20.3268	19.3052	19.3116
CHL1_HUMAN	VMTPAVYAPYDVK	21.63	0.138	0.31	0.76154	0.09	0.76154	21.71	21.598	22.8551	22.6701	21.045	20.8604	21.5323	21.5905	21.7985	21.7631	21.5464	21.6315	21.6519	21.4333	21.5828	21.6583	21.9532	21.7714	21.5346	21.4817	21.7828	21.8079	21.3976	21.7088	21.663	18.4856	21.0549	20.9386	22.3	22.2134	NA	20.7304	22.0854	21.9714	22.508	22.4053	21.804	22.0592	21.6779	21.4581
CHL1_HUMAN	KTTVILPLAPFVR	19.74	0.013	0.04	0.97131	0	0.97131	NA	18.807	20.6507	20.5329	19.2446	19.046	19.5048	19.7215	NA	NA	20.1899	NA	NA	NA	19.762	20.0157	19.9981	19.7336	NA	NA	19.9103	NA	19.4813	19.1172	19.8634	19.2577	NA	NA	NA	NA	NA	NA	NA	NA	21.0412	20.7912	NA	NA	18.8652	18.9978
CHL1_HUMAN	IPNEGHISHFQGK	19.31	0.31	0.97	0.34126	0.93	0.34126	NA	NA	20.4176	20.1476	NA	NA	19.7218	19.6835	19.4633	19.4598	19.136	19.4023	19.6058	18.962	NA	19.2001	NA	19.2584	19.3069	18.3038	19.2295	18.9837	NA	18.4282	19.2917	18.7215	19.3045	18.4887	19.5353	19.502	NA	18.4886	19.6668	19.4749	20.2382	20.1332	NA	19.3558	NA	18.3223
CHL1_HUMAN	VDKDTATLSWGLPK	20.26	0.015	0.07	0.94621	0	0.94621	20.2641	20.1278	21.3043	21.2838	19.599	19.0847	20.4101	20.4336	20.4981	20.3779	20.2486	20.141	20.2079	20.2328	20.1372	20.2411	20.6506	20.4805	19.8443	19.8571	20.2043	20.22	19.956	20.0414	20.1029	20.0398	19.6261	18.9758	20.8816	20.781	19.3954	19.3678	20.8443	20.8751	21.2996	21.3094	20.6619	20.6106	19.924	20.0114
CHL1_HUMAN	THPVEVFEPGAEHIVR	21.18	0.246	1.06	0.29539	1.12	0.29539	21.5082	21.2435	22.0222	22.234	20.6258	20.5901	21.5106	21.5505	21.5694	21.5878	21.0937	20.9182	21.0745	21.0786	21.0196	21.0013	21.6852	21.587	20.7128	20.7139	21.2689	21.3297	20.6769	20.796	21.0551	20.8593	20.1666	20.0508	21.8561	21.7538	20.4493	20.2653	21.8264	21.6625	22.2217	22.0689	21.5302	21.5394	NA	19.3988
CHL1_HUMAN	LLLPPTESGSESSITILK	20.1	0.013	0.06	0.95444	0	0.95444	20.1686	20.1536	21.2195	21.1844	19.5276	19.5168	19.8744	20.1081	20.5302	20.6396	19.8225	19.8564	19.9997	20.0279	19.8967	20.0884	20.1641	20.2686	19.5201	19.6053	20.1772	20.2631	19.4634	19.8379	19.8981	20.0345	18.988	19.0668	20.7756	20.9808	18.7568	18.9738	20.8358	20.8457	21.2785	21.2137	20.3095	20.3157	19.7895	20.1097
CHL1_HUMAN	VNGSPVDNHPFAGDVVFPR	18.83	0.259	0.26	0.79654	0.07	0.79654	17.6692	19.0076	19.669	19.6941	18.286	NA	18.0303	NA	19.4692	19.4109	NA	18.3689	NA	18.9777	18.6268	18.8123	18.9957	19.2227	NA	20.6938	NA	21.2477	NA	NA	NA	NA	15.824	17.3157	21.6997	18.5371	NA	17.8895	18.0875	18.2574	22.2303	18.0508	18.1116	NA	17.2518	17.7599
CHL1_HUMAN	TTEEDAGSYSCWVENAIGK	18.13	-0.462	-0.91	0.38036	0.82	0.38036	NA	NA	NA	17.6283	NA	NA	NA	17.4123	17.9571	NA	NA	NA	NA	NA	NA	NA	NA	NA	NA	NA	NA	17.5831	NA	16.9381	NA	NA	NA	NA	17.5755	17.9426	NA	NA	18.2067	18.6792	19.6173	19.7177	18.1296	18.3614	NA	NA
CHL1_HUMAN	VQVAFPFDEYFQIECEAK	18.76	-0.335	-0.79	0.43298	0.63	0.43298	18.5258	18.5511	20.4627	20.511	17.5018	17.5938	18.5001	18.3934	19.4525	19.4777	19.0717	18.1842	19.0425	18.3172	18.6366	18.8471	17.2387	NA	18.2114	17.2136	19.0878	18.4439	18.0892	17.9354	18.0602	17.8515	18.0857	18.2273	19.9337	19.6432	17.1772	17.5026	20.2548	19.9718	20.9049	20.3602	19.2738	19.928	18.0156	19.1142
CHL1_HUMAN	IDPLEVEEGDPIVLPCNPPK	21.02	-0.044	-0.16	0.87003	0.03	0.87003	21.3853	21.3859	21.3769	21.6676	20.9852	21.0354	20.798	21.1354	21.0065	21.3712	20.6476	20.3978	20.7335	20.6139	20.7747	21.0864	21.3957	21.2748	20.507	20.3218	21.4301	21.5115	20.6774	20.4958	21.2418	21.3895	19.1569	19.5874	21.7528	21.7818	19.4002	19.7103	21.8576	21.8712	22.5124	22.4219	21.1951	21.3745	20.926	20.4919
CHL1_HUMAN	ACTSQGCGKPITEESSTLGEGSK	18.83	0.412	1.43	0.16058	2.04	0.16058	18.3019	18.6893	19.7309	20.0942	18.4919	18.6781	19.6715	19.2808	19.5906	19.6861	18.2714	18.5892	18.3563	18.7193	18.9717	18.4822	19.7644	20.1075	18.286	18.5931	18.2653	18.7639	18.5377	18.4535	18.1701	18.3997	NA	17.9651	18.8353	19.1154	17.6689	17.9819	19.1807	19.3959	19.6433	20.1296	19.1295	18.3492	18.105	17.9597
CHL1_HUMAN	GEILLLECFAEGLPTPQVDWNK	17.18	-0.585	-1.04	0.30457	1.08	0.30457	16.7518	16.5326	19.3224	18.8515	16.2475	14.042	16.6487	16.7076	18.1255	17.6716	17.3354	16.7903	16.9188	16.5956	16.7675	17.4506	NA	NA	15.8336	15.1169	18.2229	17.1541	16.6245	16.6561	17.0611	16.1724	15.9554	16.8511	19.0369	18.7583	15.4413	16.0123	18.3053	17.393	19.3868	18.865	17.7477	18.3002	17.6855	17.5334
CHL1_HUMAN	CTASNFLGTATHDFHVIVEEPPR	18.62	-0.348	-0.97	0.33864	0.94	0.33864	18.9865	18.518	19.8145	19.7415	17.9022	18.4956	18.474	18.6942	18.9606	19.0666	NA	NA	NA	18.0648	18.4551	18.4752	18.0064	17.4467	17.8796	17.4256	18.9523	18.7301	18.3057	17.8804	18.9029	18.2755	NA	NA	NA	19.6808	NA	17.3223	19.8287	19.4121	NA	20.5751	18.9999	18.8147	17.8301	17.8682
CHL1_HUMAN	GAGPESEPYIFQTPEGVPEQPTFLK	21.65	0.055	0.23	0.8173	0.05	0.8173	21.5596	21.9859	22.4928	22.7652	21.0244	21.0749	21.6043	21.7936	22.0486	22.1578	21.4882	21.6517	21.5464	21.5703	21.3769	21.7654	21.5833	21.2815	21.322	21.4814	21.7546	21.571	21.1433	21.2176	21.5593	21.622	20.4153	20.947	22.1045	22.4004	20.5167	20.9052	22.181	22.335	22.6221	22.5365	21.4869	22.0187	21.3907	21.7446
CHL1_HUMAN	GLPPLHIYWMNIELEHIEQDER	20.43	-0.651	-1.23	0.22581	1.51	0.22581	20.4701	20.0611	22.2878	22.0758	19.369	19.6377	20.4435	20.3822	21.0943	21.1197	20.7093	20.6613	20.8618	20.358	20.9727	20.9574	NA	13.8923	19.7194	19.4022	20.4772	19.9406	20.3363	20.0719	20.1658	19.606	19.4262	20.0276	21.543	21.4084	20.1294	19.8359	21.2025	20.7847	22.0626	21.7529	21.2731	21.4202	20.4215	20.4073
CHL1_HUMAN	SQPSQPSDHHETPPAAPDRNPQNIR	17.23	0.445	1.39	0.17217	1.93	0.17217	17.1676	16.2102	18.4515	18.191	16.7539	16.1508	18.6602	18.801	18.1186	17.7321	NA	16.8818	17.075	16.9886	17.1549	17.0944	18.5657	18.3596	16.6536	16.709	16.9053	16.9407	17.3776	17.4749	17.0644	16.4485	NA	16.6517	17.4039	17.0192	15.8804	15.8193	17.6601	17.5122	18.4141	18.5972	17.0444	16.9006	15.9158	16.0428
CHL1_HUMAN	KPQSAVYSTGSNGILLCEAEGEPQPTIK	18.66	-0.556	-2.32	0.02638	5.38	0.02638	19.1188	19.0355	18.7382	18.8549	18.3062	18.5387	18.8529	18.8933	18.8373	18.8235	NA	NA	17.5024	17.7605	17.8403	18.0462	18.6722	18.3809	17.357	17.5568	19.0321	19.2316	18.5912	18.5712	18.788	18.6801	NA	NA	18.912	18.9096	NA	NA	18.8377	18.9468	20.4211	20.3743	18.8629	18.7553	18.3423	17.9668
CK041_HUMAN	SSSMTTLAK	14.45	0.745	1.06	0.30457	1.13	0.30457	NA	NA	15.7425	16.1351	NA	NA	NA	NA	15.1504	14.4155	NA	NA	NA	NA	NA	NA	15.0017	14.831	NA	12.9001	NA	13.6466	NA	11.3316	NA	NA	NA	NA	14.5576	14.838	NA	NA	NA	14.5956	NA	15.1524	NA	14.0506	NA	NA
CKAP2_HUMAN	AQSAFKEQR	18.07	-3.688	-2.81	0.03077	7.92	0.03077	NA	NA	NA	NA	NA	NA	NA	NA	NA	NA	NA	14.8861	NA	NA	NA	NA	NA	NA	NA	NA	18.8795	NA	NA	16.9142	19.4511	20.2074	NA	NA	NA	NA	NA	NA	NA	NA	NA	NA	NA	NA	NA	NA
CL053_HUMAN	HVCVWER	19.18	0.154	0.31	0.75809	0.1	0.75809	18.7532	18.8332	19.9588	19.8811	19.0441	18.8328	19.8111	19.4426	19.5651	19.6449	18.7078	18.5162	19.0622	19.4649	19.4702	19.466	19.4005	19.1481	19.064	19.0321	19.6732	19.668	19.6688	19.2178	18.7952	19.2699	17.3801	18.3882	19.5878	19.554	18.2525	18.772	19.6535	19.697	16.497	19.7947	20.5812	20.0488	18.9706	18.5585
CLIP2_HUMAN	AQVSALESK	14.39	0.186	0.45	0.65865	0.2	0.65865	NA	NA	15.2817	14.6791	NA	NA	NA	NA	14.0642	13.9637	14.2195	14.8809	NA	NA	NA	14.1658	14.7437	14.8186	14.413	13.7406	NA	13.0855	NA	NA	NA	NA	NA	NA	15.008	14.9578	13.9652	13.1	14.5036	14.1511	14.7312	14.7928	14.8517	14.5389	NA	NA
CLUS_HUMAN	KYNELLK	18.24	0.271	0.77	0.44782	0.59	0.44782	17.9942	NA	17.4687	18.1031	18.4786	18.3636	NA	NA	18.0581	18.3945	19.2261	NA	NA	18.3518	NA	NA	18.592	NA	18.7532	18.7492	NA	NA	18.315	NA	18.3245	18.6078	17.0604	18.0341	18.2422	18.3138	NA	NA	18.1342	18.3394	18.1309	18.3224	17.1174	18.3931	18.4314	18.2247
CLUS_HUMAN	FMETVAEK	23.3	0.041	0.29	0.77007	0.09	0.77007	23.1263	23.2845	23.5849	23.5287	23.3443	23.3225	23.3081	23.0454	23.1394	23.321	23.1033	22.8882	23.1192	23.2511	23.3837	23.2768	23.5225	23.4348	23.7537	23.7017	23.1076	23.0827	23.371	23.1196	23.6332	23.6456	22.9107	23.0273	23.4721	23.4722	22.8018	22.9672	23.3996	23.2743	23.4452	23.3824	23.5731	23.2557	23.5353	23.1492
CLUS_HUMAN	EIQNAVNGVK	21.95	0.191	1.09	0.28046	1.2	0.28046	21.6713	21.9437	21.961	22.1653	22.169	22.2987	22.1464	22.0444	22.2048	22.0876	21.524	21.9236	21.646	21.9519	22.1658	21.8793	22.127	22.3399	22.1893	22.4263	21.4849	21.6231	21.897	22.0215	21.8832	22.202	21.5791	21.8031	21.8796	21.969	21.3204	21.7248	21.795	21.9576	21.8962	22.118	22.3486	21.7669	21.7989	21.9752
CLUS_HUMAN	IDSLLENDR	23.2	0.161	0.89	0.37695	0.8	0.37695	22.9203	23.4553	23.0611	23.4452	23.3326	23.4983	23.2736	23.0954	23.2475	23.4977	22.9483	23.1155	23.0665	23.2747	23.4707	23.3333	23.2314	23.2459	23.4536	23.6739	22.8895	22.857	23.1617	22.8443	23.4203	23.659	22.346	22.6974	23.0686	23.3175	22.5932	23.1168	23.1362	23.3498	23.1304	23.3297	23.4726	23.3215	23.3968	23.3037
CLUS_HUMAN	RPHFFFPK	20.88	-0.264	-0.77	0.44457	0.6	0.44457	21.8071	20.8377	20.3184	20.8182	20.99	20.1995	21.0478	21.273	20.782	20.877	20.9164	21.2038	21.2032	20.7354	20.492	21.1996	19.6877	18.621	21.1282	20.9123	21.1525	21.0738	20.5919	20.1486	21.4818	21.1081	21.3738	20.9378	21.1876	21.1076	20.999	20.5227	21.0639	20.6161	21.2423	21.1625	20.4653	21.4824	21.4966	21.1234
CLUS_HUMAN	TLLSNLEEAK	25.18	-0.155	-0.24	0.81351	0.06	0.81351	25.6121	25.5818	20.5156	25.5427	25.3542	25.4396	25.2912	25.3696	25.3337	25.2569	25.1244	25.3091	25.1256	25.2184	25.2305	25.2391	25.2565	25.4755	25.3999	25.4484	24.9515	25.1095	24.9841	25.2532	25.5012	25.6458	25.2288	24.918	25.3584	25.4151	24.9257	24.9867	25.2612	25.2537	25.4308	25.4534	25.4354	25.0158	25.5179	25.5744
CLUS_HUMAN	KTLLSNLEEAK	21.52	-0.053	-0.34	0.73561	0.12	0.73561	21.6296	21.8321	21.389	21.6515	21.1794	21.0832	21.4109	21.7788	21.4074	21.4253	21.4875	21.3988	21.5352	21.4532	21.336	21.4724	21.3858	21.6369	21.8382	21.6275	21.2535	21.4896	20.8578	21.151	21.7676	21.974	21.5483	21.3499	21.6658	21.6636	21.435	21.2399	21.5348	21.6151	22.0622	21.5658	21.5978	21.6697	21.7703	21.8022
CLUS_HUMAN	ELDESLQVAER	23.56	0.126	0.93	0.3564	0.87	0.3564	23.6605	23.781	23.1805	23.2639	23.6593	23.8117	23.8146	23.6994	23.5941	23.5511	23.2844	23.3112	23.3266	23.4913	23.566	23.4087	23.843	24.0741	24.1691	23.9757	23.2728	23.4566	23.5956	23.6006	23.7733	23.9457	23.3702	23.1247	23.4759	23.3804	23.3168	23.3227	23.4875	23.4443	23.3883	23.3684	23.5396	23.2131	23.9139	23.9574
CLUS_HUMAN	ASSIIDELFQDR	25.21	-0.047	-0.37	0.71061	0.14	0.71061	25.2634	25.4798	25.453	25.5128	25.0291	25.2566	25.0592	25.0811	25.1652	25.2819	25.2658	25.235	25.2923	25.1894	25.2515	25.1433	24.8472	24.5804	25.2115	25.1171	24.9988	24.9528	24.9449	24.8578	25.6549	25.5375	25.0691	25.1605	25.3324	25.2612	24.9805	24.9503	25.453	25.3264	25.6874	25.4884	25.226	25.2816	25.1165	25.3838
CLUS_HUMAN	RELDESLQVAER	19.14	0.105	0.65	0.52161	0.42	0.52161	18.7022	19.1965	19.0223	19.0453	19.271	19.4531	19.4869	19.1632	18.9554	19.2387	19.1893	19.0716	19.1168	19.0923	19.1478	19.122	19.4198	19.2985	19.4762	19.4464	18.6896	18.7929	19.2195	18.6348	19.5588	19.6677	18.6166	18.8774	19.2004	19.2681	18.5994	18.9098	19.1617	19.1285	19.3398	19.3587	19.2407	19.1353	19.1999	19.2096
CLUS_HUMAN	YVNKEIQNAVNGVK	18.83	-0.074	-0.15	0.87823	0.02	0.87823	18.7734	17.0131	19.0441	19.2221	19.2001	19.2434	20.171	19.5498	19.2619	19.3673	18.5768	16.1876	18.6628	19.1309	18.5154	18.4693	19.0409	19.0184	18.4396	18.6318	18.3531	18.1839	19.1476	17.9757	19.4663	19.7814	NA	19.1104	19.145	19.1661	18.9399	18.984	18.3836	18.6708	19.5432	19.6914	19.2412	18.7113	17.628	NA
CLUS_HUMAN	EILSVDCSTNNPSQAK	23.61	0.179	0.88	0.38465	0.77	0.38465	23.3802	23.8061	23.5974	24.0411	23.7212	23.9224	23.7835	23.4943	23.7167	23.9288	23.2404	23.5322	23.3553	23.5836	23.6535	23.5401	23.7525	23.7976	23.9041	24.2045	23.2905	23.2591	23.5349	23.1996	23.519	23.9678	22.8857	23.6102	23.4939	23.8112	22.9932	23.3927	23.4468	23.7499	23.6706	23.884	23.6789	23.5139	23.6374	23.833
CLUS_HUMAN	QQTHMLDVMQDHFSR	23.37	-0.036	-0.24	0.81531	0.06	0.81531	23.7462	23.3919	23.9377	23.9949	22.7436	22.6462	23.4395	23.3424	23.3458	23.3048	23.4628	23.3642	23.165	22.9174	23.4458	23.3222	23.1275	22.8473	23.7538	23.7239	23.1976	23.1137	23.1324	23.0856	23.5051	23.2264	23.6125	23.4896	23.6042	23.5465	23.0685	22.8963	23.3602	23.302	23.8774	23.683	23.6931	23.4644	23.5155	23.364
CLUS_HUMAN	LFDSDPITVTVPVEVSR	24.18	-0.147	-0.22	0.8239	0.05	0.8239	24.8108	24.8221	23.7342	23.9128	24.6379	24.6297	24.5078	24.5543	24.302	24.3796	24.0452	23.9476	24.2189	24.1131	24.6825	24.3659	24.3343	19.3206	24.4098	24.4098	24.3998	24.2901	24.5287	24.3217	24.6283	24.4617	23.702	23.8441	24.2708	24.2806	24.0704	24.1088	24.4408	24.338	23.897	23.8488	23.8842	24.1306	24.8322	24.8005
CLUS_HUMAN	ASSIIDELFQDRFFTR	16.66	-0.393	-0.76	0.46045	0.58	0.46045	NA	15.9626	NA	NA	NA	NA	15.3705	NA	NA	NA	15.8961	16.7535	NA	16.7293	NA	NA	NA	NA	17.6082	17.4773	NA	NA	NA	NA	NA	NA	NA	NA	NA	NA	NA	NA	17.0161	16.8806	16.0023	NA	NA	16.6749	NA	17.5441
CLUS_HUMAN	EPQDTYHYLPFSLPHR	24.64	-0.068	-0.45	0.65588	0.2	0.65588	24.8196	24.5599	25.1997	25.064	24.3383	24.2054	24.7456	24.8158	24.6795	24.5108	24.711	24.4112	24.7113	24.5304	24.5879	24.5859	24.1765	23.9493	24.7696	24.7033	24.4026	24.2882	24.3609	24.4045	24.9124	24.7967	25.03	24.6394	24.9163	24.7314	24.548	24.3468	24.7322	24.5596	25.2738	25.1111	24.5783	24.6543	24.6781	24.4618
CLUS_HUMAN	VTTVASHTSDSDVPSGVTEVVVK	25.02	0.1	0.89	0.38068	0.79	0.38068	25.2131	25.2238	25.1107	25.3231	24.7216	24.8165	25.2737	25.3467	25.0904	25.1117	24.8641	24.8518	24.7842	24.897	24.851	24.8767	25.0886	25.1668	25.394	25.3794	24.6297	24.8223	24.6207	24.7397	25.0849	25.1869	24.9516	24.8804	25.0016	25.0634	24.6698	24.6921	24.9246	25.0588	25.3523	25.3108	25.025	24.9519	25.1897	25.2282
CLUS_HUMAN	IDSLLENDRQQTHMLDVMQDHFSR	19.13	-0.159	-0.65	0.51906	0.43	0.51906	19.6475	19.2534	NA	19.6228	18.5497	NA	19.1387	19.4925	18.8013	18.6645	NA	NA	19.1004	NA	18.5831	18.8971	18.2832	NA	19.5188	19.0924	18.8335	18.5902	18.8143	NA	19.648	19.245	19.6083	19.3511	NA	19.4239	19.0998	18.6323	NA	18.7165	20.0494	19.8157	19.118	19.3829	19.3184	18.8054
CMGA_HUMAN	EAVEEPSSK	16.96	0.562	1.1	0.27846	1.21	0.27846	15.1211	15.1699	19.3135	18.9442	17.3976	16.9801	17.5235	16.7926	17.9743	17.8625	16.8702	17.6176	16.8702	16.9419	17.6428	16.6708	17.6572	18.0837	16.5232	15.8438	16.5479	17.3002	17.2983	16.9789	14.708	14.5737	NA	14.468	17.6371	17.6804	16.4507	16.3275	17.6107	17.4777	18.4385	18.479	19.0195	17.7877	14.9721	14.0188
CMGA_HUMAN	VAHQLQALR	21.08	0.034	0.14	0.88982	0.02	0.88982	20.6616	20.8678	22.6755	22.4846	20.5909	20.3668	21.0642	20.8886	21.4019	21.4969	20.9685	21.2271	21.0329	21.0165	20.7522	20.941	21.3098	21.0258	20.7919	20.4685	21.6128	21.4882	20.3839	20.2775	20.8328	20.7901	19.9084	19.7928	21.7508	21.7384	20.0557	20.0878	21.3702	21.4331	22.299	22.1997	21.9408	21.9072	20.7689	20.7192
CMGA_HUMAN	GLSAEPGWQAK	20.26	-0.017	-0.06	0.94991	0	0.94991	19.5395	19.7139	21.577	21.8495	20.0781	19.9393	20.1136	19.6304	20.5042	20.42	19.8184	19.7358	20.0611	20.0594	20.0489	20.0784	20.575	20.3914	20.0738	20.1124	20.8716	20.7307	20.1468	19.3553	20.0576	19.9586	18.5355	NA	20.9725	20.977	19.1174	19.4033	20.6182	20.6814	21.0608	21.2024	21.1257	20.8393	20.1966	20.0251
CMGA_HUMAN	ELQDLALQGAK	20.83	0.179	0.66	0.51466	0.43	0.51466	20.592	20.7788	22.1656	22.4768	20.239	20.534	20.4314	20.5598	21.3671	21.3482	20.6592	20.4737	20.4805	20.6766	20.7969	20.691	21.3124	21.5849	20.4849	20.6761	21.3034	21.5093	19.839	20.3323	20.386	20.599	18.8646	19.0905	21.4951	21.5317	19.7408	19.7602	21.0824	21.1116	21.8569	21.6103	21.7474	21.4722	20.5958	20.8267
CMGA_HUMAN	SGELEQEEER	21	0.198	0.75	0.45478	0.57	0.45478	20.2066	20.6186	22.1779	22.3501	21.3362	21.0473	20.9163	20.8382	21.5969	21.451	20.4819	20.9455	20.741	20.9683	20.9761	20.78	21.394	21.7422	20.5637	20.8584	21.0608	21.6377	21.037	21.0993	20.0586	20.4057	19.6567	19.8248	21.3384	21.4503	19.9987	20.3588	21.3353	21.4629	21.5861	21.8239	21.9209	21.4379	20.1627	20.3638
CMGA_HUMAN	EDSLEAGLPLQVR	21.63	0.062	0.24	0.815	0.06	0.815	21.5412	21.6419	23.1518	23.2799	20.3744	20.3328	21.4128	21.613	22.2473	22.1487	21.6959	21.6885	21.7216	21.759	21.7708	21.6174	22.0982	22.2733	20.5439	20.3918	21.2109	21.2642	20.9228	20.9884	20.6846	20.4701	20.8049	20.7005	22.4971	22.507	21.0547	20.9414	22.1721	22.2212	22.8984	22.9405	22.3946	22.3744	21.5742	21.4365
CMGA_HUMAN	EEEEEMAVVPQGLFR	23.13	0.054	0.25	0.8007	0.06	0.8007	23.4974	23.1978	24.1754	24.359	22.7459	22.7912	22.8991	23.0893	23.5756	23.4343	22.7838	22.8095	22.6743	22.9379	22.9131	23.0826	23.3011	23.2636	22.6934	22.8878	23.9076	23.8289	22.7966	22.9772	22.8142	22.7853	21.5613	21.8829	23.6258	23.5957	22.2963	22.2841	23.5216	23.5204	23.439	23.6969	23.3881	23.5921	23.1058	23.4072
CMGA_HUMAN	YPGPQAEGDSEGLSQGLVDR	23.69	0.087	0.41	0.68669	0.17	0.68669	23.6486	23.7102	24.8275	25.0346	23.2901	23.3752	23.5754	23.7866	24.0454	24.0763	23.3744	23.417	23.3345	23.6424	23.3582	23.5542	23.8686	23.9017	23.2804	23.5299	24.1855	24.2985	23.3984	23.6347	23.2741	23.2409	22.2875	22.4835	24.0888	24.165	22.6376	22.8461	23.8252	24.101	24.3963	24.4049	24.2807	24.3246	23.4027	23.6193
CMGA_HUMAN	RPEDQELESLSAIEAELEK	22.86	0.107	0.46	0.64693	0.21	0.64693	22.8745	23.0204	24.1652	24.3321	22.2684	22.3319	22.8173	22.7134	23.3501	23.4859	22.867	22.879	22.8591	22.7687	22.7044	22.8973	22.6707	22.3167	22.5317	22.4975	23.2358	23.0799	22.2919	22.1758	22.4093	22.2984	21.2457	21.7018	23.4779	23.4351	22.106	21.9098	23.3462	23.2826	23.8742	23.6457	23.4139	23.5421	22.7861	22.9438
CMGA_HUMAN	SGEATDGARPQALPEPMQESK	22.48	0.112	0.49	0.62737	0.24	0.62737	22.3029	22.4838	23.6267	23.9773	22.0523	22.142	22.6925	22.4135	22.8399	22.8947	22.0214	22.2356	22.1939	22.2973	22.2478	22.1336	22.8301	22.6861	22.2089	22.4054	23.0253	23.0163	22.4119	21.9736	22.1162	22.2314	20.9692	21.439	22.8122	22.9431	21.3421	21.6888	22.7363	22.8608	23.2069	23.3389	22.994	22.8974	22.1986	22.2379
CMGA_HUMAN	SEALAVDGAGKPGAEEAQDPEGK	21.98	0.202	0.87	0.3893	0.76	0.3893	21.7989	21.926	23.3253	23.5438	21.6269	21.8045	22.2624	22.0867	22.4594	22.509	21.61	21.6576	21.6399	21.8199	21.7817	21.5876	22.2302	22.3588	21.7237	21.8927	22.4555	22.5212	21.8373	21.4559	21.4304	21.5156	20.3681	20.7926	22.3389	22.4205	20.896	21.1869	22.2616	22.3254	22.7002	22.8263	22.6031	22.3951	21.5487	21.7347
CMGA_HUMAN	YPGPQAEGDSEGLSQGLVDREK	19.44	0.207	0.29	0.7845	0.08	0.7845	NA	NA	19.4396	19.6508	NA	NA	NA	NA	NA	NA	NA	NA	NA	NA	NA	NA	NA	NA	NA	NA	NA	NA	NA	NA	NA	NA	NA	NA	NA	NA	NA	NA	NA	NA	NA	19.7709	18.9062	NA	NA	NA
CMGA_HUMAN	HSGFEDELSEVLENQSSQAELK	23.11	-0.018	-0.08	0.93659	0.01	0.93659	22.9176	23.3916	24.375	24.5092	22.6504	22.7025	22.9622	23.0664	23.4544	23.4381	23.0332	23.0911	22.9027	22.9232	22.8452	22.9427	22.9121	22.4991	22.59	22.7145	23.6693	23.6522	22.8851	22.7934	22.769	22.5929	21.9072	22.1217	23.5612	23.7093	21.9533	22.2551	23.6043	23.4671	24.0998	23.9763	23.6367	23.5576	22.918	23.1521
CMGA_HUMAN	KHSGFEDELSEVLENQSSQAELK	19.47	NA	NA	NA	NA	NA	NA	NA	NA	19.4673	NA	NA	NA	NA	NA	NA	NA	NA	NA	NA	NA	NA	NA	NA	NA	NA	NA	NA	NA	NA	NA	NA	NA	NA	NA	NA	NA	NA	NA	NA	NA	NA	NA	NA	NA	NA
CMGA_HUMAN	GEQEHSQQKEEEEEMAVVPQGLFR	22.44	-0.178	-0.94	0.3536	0.88	0.3536	22.9862	22.4549	23.3456	23.4564	22.105	22.0236	22.5997	22.6489	22.4039	22.2977	21.9971	21.8485	22.169	22.1168	22.202	22.1882	22.2937	21.9491	22.1364	21.929	22.8423	22.7952	22.326	22.4488	22.1663	21.975	NA	NA	22.6751	22.553	NA	NA	22.6134	22.5786	23.0361	22.9294	22.6233	22.6229	22.3763	22.0033
CMGA_HUMAN	CIVEVISDTLSKPSPMPVSQECFETLR	18.38	NA	NA	NA	NA	NA	NA	NA	18.3355	18.4195	NA	NA	NA	NA	NA	NA	NA	NA	NA	NA	NA	NA	NA	NA	NA	NA	NA	NA	NA	NA	NA	NA	NA	NA	NA	NA	NA	NA	NA	NA	NA	NA	NA	NA	NA	NA
CMGA_HUMAN	SEALAVDGAGKPGAEEAQDPEGKGEQEHSQQK	18.28	-0.238	-0.67	0.51041	0.45	0.51041	NA	17.1492	19.1096	18.9172	17.7388	NA	18.5253	18.2928	18.4462	18.4274	NA	NA	NA	NA	17.5326	17.0261	18.5966	NA	NA	NA	18.5986	18.7576	17.8818	NA	NA	NA	NA	NA	NA	NA	NA	NA	NA	18.0417	18.8378	19.2154	NA	17.9656	NA	NA
CMGA_HUMAN	AEGNNQAPGEEEEEEEEATNTHPPASLPSQK	19.79	0.26	1	0.32381	1	0.32381	20.0151	20.1837	20.7876	20.8974	19.2808	19.6534	20.4172	20.4116	20.362	20.3609	19.0904	19.2161	19.2765	19.6029	19.2893	19.1312	20.4914	20.6242	19.476	19.838	20.3297	20.8018	19.763	20.0607	19.3503	19.4578	18.0389	17.8777	19.8168	19.8657	18.6155	18.7191	20.175	20.1085	20.2056	20.5982	19.9232	19.9773	19.5511	19.9675
CN045_HUMAN	LLFAKMNGCPSRK	22.08	0.486	1.82	0.07648	3.3	0.07648	23.3981	23.0858	20.6336	20.6388	23.4578	23.3533	21.9843	22.2443	21.9534	21.9904	21.4595	21.4465	21.9888	21.9519	22.4507	22.6416	23.2602	23.3221	22.68	22.4829	22.2823	22.3515	21.9751	22.1384	22.5426	22.5139	20.4987	20.652	21.225	21.3205	21.7607	21.7964	22.2296	22.1179	20.7284	20.8706	21.7243	21.9217	23.0058	23.0481
CND3_HUMAN	ATQASKSTQLK	17.97	0.297	0.46	0.65713	0.21	0.65713	18.8958	19.2598	NA	NA	NA	NA	NA	NA	NA	NA	NA	NA	NA	NA	NA	NA	NA	16.886	NA	NA	17.5781	17.4201	NA	NA	18.1663	17.8516	NA	NA	NA	NA	NA	17.0333	NA	NA	NA	NA	NA	NA	18.0672	18.5675
CNDP1_HUMAN	DGSTIPIAK	20.3	-0.104	-0.45	0.65416	0.2	0.65416	19.9613	20.116	20.8298	20.6975	20.6295	20.6528	19.8347	NA	20.1229	20.2239	20.4117	20.4241	19.5643	19.6338	20.8612	20.7125	20.0577	NA	20.0382	19.8425	20.8818	20.7542	20.0651	NA	19.3796	19.2557	NA	NA	21.2868	21.3097	19.4156	19.558	20.6862	20.5981	19.8505	19.7731	21.4053	21.0062	NA	NA
CNDP1_HUMAN	HLEDVFSK	20.94	0.254	0.78	0.44027	0.61	0.44027	21.1069	21.0881	21.6894	21.8163	21.2153	21.3622	20.7433	20.0014	21.214	21.2979	21.4004	21.2705	20.2384	20.4172	22.0822	21.7585	20.4835	20.5985	20.7547	20.7896	21.7214	21.5999	20.9467	20.155	19.9905	20.2243	19.8941	20.0641	22.2551	22.3036	20.1867	20.5184	21.3471	21.381	20.7008	20.7544	22.661	21.9382	18.9545	18.6526
CNDP1_HUMAN	KPAITYGTR	18.1	0.361	0.99	0.32811	0.98	0.32811	18.3084	17.8949	19.1981	18.921	18.4061	18.3016	18.0895	17.6114	18.444	18.1349	18.5836	18.7557	17.3735	17.2658	18.9714	19.0334	17.8145	17.7378	18.1113	17.974	18.8311	19.0709	17.9656	17.9043	16.465	16.5993	NA	17.1334	19.5854	19.5344	NA	17.688	18.6384	18.5277	17.6606	17.7043	19.8699	19.5413	15.2526	14.7784
CNDP1_HUMAN	WNYIEGTK	19.58	-0.002	-0.01	0.99309	0	0.99309	19.6075	19.6188	20.058	20.2843	19.7398	19.7741	18.7547	18.6736	19.5886	19.5275	19.8543	20.0235	18.6375	18.6735	20.5063	20.3262	19.2019	19.4735	19.1203	19.3382	20.3071	20.3032	19.1992	19.341	18.3405	18.487	18.5144	NA	20.7129	20.7747	18.9566	19.055	20.0704	19.8995	18.7148	NA	20.9943	20.5719	NA	NA
CNDP1_HUMAN	GNSYFMVEVK	18.65	0.207	0.59	0.55961	0.35	0.55961	19.0695	18.8586	19.9438	19.877	18.3925	18.3922	18.221	17.9951	18.9721	19.0152	19.3693	19.3927	18.0337	18.0302	19.8203	19.7323	17.6822	17.1349	18.7568	18.382	19.6463	19.5819	18.2101	18.0912	17.2056	17.1853	18.3404	17.7889	20.3511	20.1634	18.1222	17.8965	19.3591	19.1699	18.6172	18.0746	20.2656	20.0078	16.4255	16.4315
CNDP1_HUMAN	MMAVAADTLQR	20.81	0.1	0.39	0.70186	0.15	0.70186	21.037	20.9142	21.6122	21.5223	20.9411	20.8486	20.1076	20.2304	20.9894	20.9141	21.3372	21.3577	20.3316	20.1106	21.4723	21.4438	20.3789	20.3925	20.6208	20.6544	21.7432	21.9244	20.4793	20.5893	19.9001	19.9942	20.1711	20.0901	22.3655	22.0474	20.4268	20.2303	21.3819	21.1938	20.5677	20.3588	21.875	21.8279	18.9701	19.0791
CNDP1_HUMAN	EEILMHLWR	18.35	0.197	0.36	0.72201	0.13	0.72201	NA	18.1987	20.0309	NA	17.6746	17.3428	18.211	18.2897	18.9196	19.178	17.8678	19.3479	18.4786	18.8028	18.2319	19.686	16.9146	16.9202	NA	NA	17.2445	19.5654	17.6183	17.4287	17.5352	18.0096	NA	17.584	18.6401	18.8269	NA	17.7949	19.1889	18.2132	NA	17.8787	19.8906	20.0822	18.062	18.0434
CNDP1_HUMAN	ALEQDLPVNIK	22.05	0.204	0.84	0.4078	0.7	0.4078	22.2699	22.4192	22.6793	22.7522	22.199	22.333	21.4384	21.6754	22.2858	22.2775	22.3872	22.5674	21.3665	21.6024	22.621	22.5922	21.8567	22.0183	21.7876	21.8694	22.6592	22.894	21.4925	21.8135	21.1577	21.2689	21.377	21.3219	23.2083	23.2353	21.4172	21.68	22.3079	22.5216	21.7746	21.799	23.2017	23.0799	20.3163	20.4005
CNDP1_HUMAN	AIHLDLEEYR	18.43	0.363	0.86	0.39996	0.73	0.39996	NA	18.9931	19.6988	19.3256	NA	17.7294	17.3443	NA	18.2623	18.2706	19.0649	18.7583	NA	NA	NA	18.7822	NA	NA	NA	NA	18.9999	NA	NA	NA	NA	16.6085	17.823	17.4509	19.7014	19.7217	17.891	17.3972	18.8362	18.487	18.1836	18.2436	19.5188	19.3203	16.3162	NA
CNDP1_HUMAN	TVFGTEPDMIR	20.65	0.097	0.39	0.69739	0.15	0.69739	20.9213	20.8912	21.4988	21.4594	20.6287	20.6889	19.9593	20.0701	20.7374	20.6928	21.1658	20.9127	20.0733	20.0645	21.3015	21.3476	20.2488	20.2729	20.4281	20.5702	21.5127	21.5866	20.2555	20.5035	19.8569	20.0022	19.9431	19.9296	22.0234	21.9327	20.1589	20.1766	21.0563	21.0292	20.4561	20.4261	21.8059	21.6188	18.7953	18.9176
CNDP1_HUMAN	GPVLAWINAVSAFR	18.87	0.078	0.14	0.89245	0.02	0.89245	18.7514	18.6107	21.3342	20.8962	17.2603	16.7761	17.0724	17.7118	19.4535	18.8599	20.6713	20.5986	19.0731	18.6238	20.2326	20.6505	NA	NA	16.9638	16.9136	19.6038	19.2332	17.8004	17.7912	16.8492	16.6564	19.4625	19.4214	21.3884	21.6061	19.0428	18.6224	19.619	19.269	18.9265	18.6421	20.8392	21.4106	15.1097	15.424
CNDP1_HUMAN	LFAAFFLEMAQLH	15.11	-0.892	-0.56	0.596	0.31	0.596	NA	NA	16.1697	13.8133	NA	NA	NA	NA	NA	NA	14.1759	NA	NA	NA	NA	NA	NA	NA	NA	NA	15.2046	NA	NA	NA	NA	NA	NA	NA	16.5278	NA	NA	NA	NA	NA	NA	NA	14.7404	NA	NA	NA
CNDP1_HUMAN	EWVAIESDSVQPVPR	20.18	-0.149	-0.34	0.73734	0.11	0.73734	18.8964	19.1492	21.4757	21.3474	20.6075	20.526	18.826	19.2952	19.5826	19.5249	20.9997	21.132	20.5375	20.504	21.0981	21.0459	18.8373	19.128	20.3381	19.2684	21.1201	19.4419	18.6804	20.2352	18.7957	19.1356	20.24	20.2345	21.5506	21.5092	20.273	20.3669	20.9561	20.9392	20.596	20.7929	21.5706	21.5512	18.4566	18.6619
CNDP1_HUMAN	GDGWLTDPYVLTEVDGK	21.12	-0.09	-0.33	0.74425	0.11	0.74425	21.6963	21.4095	21.8652	22.0608	20.976	20.8594	20.191	20.4758	21.1562	21.0941	21.7484	21.9641	20.5456	20.5314	21.9055	21.9263	19.9833	19.5337	20.7896	20.7559	21.5821	21.6269	20.396	20.527	20.1732	19.9289	20.464	20.5578	22.1982	22.3451	20.878	20.7386	21.6585	21.7442	20.784	20.6751	22.2382	22.4206	NA	NA
CNDP1_HUMAN	YPSLSIHGIEGAFDEPGTK	21.15	0.191	0.7	0.48685	0.49	0.48685	21.7514	21.6913	21.9204	22.0332	21.2339	21.2742	20.7771	20.9248	21.3376	21.4957	21.7633	21.6471	20.5316	20.7058	21.8173	21.929	20.1879	20.2042	20.6901	20.9104	21.8637	22.0408	20.6208	20.6679	20.1812	20.2949	20.1876	20.5987	22.5084	22.5065	20.3956	20.5969	21.7445	21.7792	21.0256	21.0471	22.1973	22.1245	19.2013	19.4235
CNDP1_HUMAN	GATDNKGPVLAWINAVSAFR	19.6	-0.275	-0.59	0.56043	0.34	0.56043	20.1178	19.8452	20.4245	20.6703	19.4851	19.4099	19.2229	19.1537	19.9074	19.7843	20.3922	20.6975	19.3383	19.413	20.7422	20.6806	15.103	NA	18.7238	18.4455	20.5662	20.5286	19.4388	18.992	18.6869	18.8327	19.3298	19.2205	21.2618	21.3068	19.3849	19.3881	20.2311	20.3529	19.9729	19.611	21.1118	21.4101	16.4368	16.732
CNDP1_HUMAN	SVVLIPLGAVDDGEHSQNEK	21.73	0.137	0.59	0.55516	0.35	0.55516	21.885	21.9636	22.5562	22.7016	21.6299	21.6426	21.3753	21.5197	22.0352	21.9212	22.2503	21.9013	21.1593	21.1898	22.1315	22.2091	21.4289	21.5049	21.4749	21.5637	22.4191	22.5263	21.4254	21.4946	20.771	20.8174	21.0873	21.0816	22.9885	22.9997	21.3084	21.3571	22.1292	22.1669	21.7405	21.7035	22.622	22.5475	20.0833	20.0266
CNDP1_HUMAN	VFQYIDLHQDEFVQTLK	21.6	0.004	0.01	0.98925	0	0.98925	22.1623	21.963	22.3904	22.527	21.676	21.7597	21.1732	21.22	21.6946	21.8149	22.2921	22.3059	21.1163	20.9723	22.1018	22.295	20.2545	20.3276	21.1234	20.9467	22.2818	22.4652	21.1071	20.9974	20.895	20.9035	21.1988	21.3976	22.9795	23.0461	21.3662	21.0251	22.0687	22.0736	21.5963	21.4963	22.6939	22.7851	19.9463	19.7192
CNDP1_HUMAN	FIIEGMEEAGSVALEELVEK	19.61	-0.264	-0.37	0.71201	0.14	0.71201	NA	NA	21.583	20.9585	19.0324	19.6459	NA	18.3632	19.8149	18.4656	20.9669	19.9635	19.3324	NA	NA	NA	16.9386	NA	NA	NA	20.3131	18.5575	NA	NA	17.8041	NA	20.1992	20.0413	21.833	21.4974	18.7504	18.9959	NA	18.9851	19.4398	18.6769	NA	20.4503	NA	NA
CNDP1_HUMAN	FFSGVDYIVISDNLWISQR	13.16	1.655	1.8	0.17141	3.22	0.17141	NA	NA	NA	NA	NA	13.9832	NA	NA	NA	NA	NA	NA	NA	NA	NA	NA	NA	NA	NA	NA	NA	NA	NA	NA	NA	NA	NA	NA	NA	NA	NA	NA	NA	NA	NA	NA	12.3278	NA	NA	NA
CNDP1_HUMAN	FIIEGMEEAGSVALEELVEKEKDR	16.81	-0.566	-1.1	0.2836	1.21	0.2836	15.6349	15.9236	17.1867	17.4165	NA	NA	NA	14.9544	NA	NA	16.5666	16.9554	NA	NA	16.9294	17.1381	NA	NA	NA	NA	17.0672	16.5834	15.7322	NA	NA	NA	NA	NA	18.4253	18.7608	NA	NA	15.9358	15.9141	16.4988	16.0538	18.2853	18.2699	NA	NA
CNDP1_HUMAN	MVVSMTLGLHPWIANIDDTQYLAAK	15.89	0.783	0.71	0.48236	0.51	0.48236	NA	NA	18.3304	16.869	NA	14.5573	NA	NA	16.2616	14.9496	16.7182	15.0285	NA	NA	18.2451	16.5648	NA	NA	NA	NA	16.2076	13.9822	14.5727	NA	NA	13.8275	15.6933	14.4214	18.7525	17.0732	14.2461	13.0223	15.8948	NA	NA	NA	17.801	16.8106	NA	15.6067
CNDP1_HUMAN	VASVDMGPQQLPDGQSLPIPPVILAELGSDPTK	20.41	-0.147	-0.34	0.73762	0.11	0.73762	20.66	20.615	21.9999	21.9785	19.4212	19.3958	19.5971	19.8035	20.8649	20.7877	21.5598	21.3392	19.8739	20.0193	21.4396	21.5894	18.3538	16.786	20.2616	20.3968	21.0239	21.0606	19.5941	19.7707	18.7952	18.8323	20.2944	20.5269	22.1891	22.4374	20.0219	20.179	21.5415	21.421	20.3309	20.2609	21.7663	22.2289	18.6341	18.784
CNTN1_HUMAN	VVATNTLGR	18.2	0.241	1.13	0.26516	1.28	0.26516	18.6844	18.1757	17.8391	18.128	18.7055	18.6784	18.2436	18.0041	18.4297	18.0642	17.7891	17.9531	17.5506	17.826	18.771	18.5596	18.9859	18.9365	18.5906	18.568	17.8759	17.8717	18.0975	18.0741	18.2675	18.1859	16.9607	17.302	18.0535	18.1181	17.1286	17.6454	18.7216	18.8684	18.6437	18.4951	18.8215	18.3677	18.1371	18.0262
CNTN1_HUMAN	TILSDDWK	19.91	0.09	0.57	0.57412	0.32	0.57412	20.1889	20.1508	NA	20.1056	19.8625	19.7882	19.8046	19.5581	19.9154	19.889	19.7502	19.8159	19.5576	19.4772	20.3494	20.2662	20.1676	20.2738	20.1611	20.1053	19.7792	19.7779	19.6074	19.5164	20.0033	19.8946	19.2538	18.9189	20.2213	20.1902	19.2594	19.1334	20.4092	20.5597	20.5305	20.4703	20.2515	20.0112	19.9119	19.7736
CNTN1_HUMAN	IVESYQIR	18.48	-0.048	-0.21	0.838	0.04	0.838	18.0477	18.4968	18.2643	18.5415	18.5671	18.7894	18.2092	17.4776	18.1193	18.4446	17.937	17.9762	18.0068	18.1939	18.6745	NA	18.9439	18.977	18.9189	19.133	18.3269	18.3318	18.4566	17.9578	18.789	19.1548	17.4449	NA	18.7699	18.843	17.5374	NA	18.9657	18.9451	18.9364	18.9467	18.9808	18.6972	18.4716	18.4889
CNTN1_HUMAN	HSIEVPIPR	18.81	0.199	0.55	0.58771	0.3	0.58771	19.4815	18.9287	19.6403	19.3604	18.8338	18.6048	18.8291	18.4136	19.2311	18.9641	19.045	18.8182	18.6646	18.3682	19.1266	18.6197	18.8891	18.8907	19.0002	18.3933	18.4799	18.5426	18.5921	18.3507	16.734	18.7906	18.5451	18.3179	19.1536	19.1026	18.1232	17.9113	19.5558	18.8978	19.8561	19.667	19.6193	18.874	18.6631	18.3491
CNTN1_HUMAN	VTVTNPDTGR	17.08	0.402	1.43	0.15922	2.06	0.15922	16.586	16.9981	17.1188	17.1348	17.7195	17.6568	17.0473	16.7228	17.6378	17.1819	16.5389	17.2471	16.5183	16.9389	17.9474	17.4771	17.6925	18.2286	17.4332	17.743	15.9788	16.4924	16.8715	17.3414	16.5419	17.0142	16.2913	16.1725	17.1211	17.2809	16.1339	16.5339	17.6817	17.9257	17.6633	17.748	NA	17.0924	16.0179	16.5566
CNTN1_HUMAN	DGEYVVEVR	19.45	-0.358	-0.39	0.69947	0.15	0.69947	19.5457	19.7053	19.4054	19.6262	NA	NA	NA	NA	19.6843	19.5284	19.4376	19.6776	19.2272	19.4541	15.7683	19.7786	NA	NA	NA	NA	NA	NA	19.8144	19.812	19.8304	20.0063	18.2195	NA	NA	NA	NA	NA	20.0673	20.1818	19.6577	19.735	NA	19.7008	NA	NA
CNTN1_HUMAN	FIPLIPIPER	22.34	-0.032	-0.21	0.83097	0.05	0.83097	22.6844	22.559	22.4648	22.3448	22.5436	22.532	22.0411	22.2966	22.2072	22.2465	22.3089	22.1986	22.2509	21.9402	22.3587	22.5821	22.2079	22.1703	22.2519	22.2	22.1403	22.032	21.9228	22.2622	22.7318	22.5799	22.1809	21.9689	22.586	22.5726	21.8458	21.6813	22.9584	22.6996	22.8381	22.549	22.4175	22.6153	22.2158	22.2381
CNTN1_HUMAN	VQVTSQEYSAR	18.62	0.248	1.02	0.31515	1.04	0.31515	NA	NA	18.6141	18.754	18.8087	18.75	18.3904	18.4916	18.9477	18.7923	17.922	18.602	NA	18.3224	19.0958	18.7344	19.024	19.2378	19.026	19.3092	18.012	18.3737	18.5392	18.6533	18.3428	18.536	17.5095	17.6849	18.4143	18.706	17.6125	18.0184	19.0567	19.2878	18.9688	19.1881	19.1986	18.6398	NA	NA
CNTN1_HUMAN	MNNGDVDLTSDR	19.68	0.252	1.21	0.23369	1.46	0.23369	19.5203	20.0654	19.617	20.0762	20.0709	20.1746	19.6822	19.6551	19.7195	19.7369	19.3004	19.2179	18.9648	19.2203	20.0192	20.142	20.1359	20.2306	20.0375	20.4494	19.1552	19.3992	19.7011	19.5368	19.7777	20.0063	18.7671	19.0032	19.3556	19.7821	18.7466	18.9944	19.9806	20.1413	19.7859	19.9004	20.1255	19.5955	19.6254	19.622
CNTN1_HUMAN	AHSDGGDGVVSQVK	18.7	0.203	0.42	0.68162	0.18	0.68162	18.1652	18.3386	NA	NA	18.7734	18.7494	18.9995	NA	NA	NA	NA	NA	NA	NA	NA	NA	18.8212	19.0556	NA	18.8158	NA	NA	NA	18.5461	NA	NA	NA	NA	NA	NA	NA	NA	NA	NA	NA	NA	NA	NA	NA	NA
CNTN1_HUMAN	VLYRPDGQHDGK	17.51	0.406	2.11	0.0414	4.47	0.0414	17.4308	17.3876	18.213	17.9732	17.6483	17.5799	18.0844	NA	17.9725	17.7863	17.2523	NA	17.184	17.2281	17.7961	17.7876	17.5747	17.7709	18.033	17.8639	NA	16.7215	17.4283	17.1803	17.1814	17.1779	NA	16.9895	17.6375	17.49	16.6487	16.6657	18.0494	17.913	18.1369	18.1579	18.0038	17.7397	16.5894	16.235
CNTN1_HUMAN	DETMSPSTAFQVK	18.53	0.259	1.05	0.2996	1.1	0.2996	19.1143	19.0482	18.2999	18.6633	18.6955	18.1882	18.3795	18.2109	18.8166	18.6994	17.9594	18.4493	17.877	18.0589	19.0334	18.8789	18.943	19.1922	19.3545	19.4012	18.2348	18.605	18.3292	18.3208	18.5984	18.6296	16.927	17.7325	18.9051	18.8328	18.0574	17.5554	18.9604	19.253	18.3131	18.7936	18.3378	18.2528	18.856	18.5979
CNTN1_HUMAN	ILALAPTFEMNPMK	21.44	-0.083	-0.54	0.59232	0.29	0.59232	21.5922	21.7603	22.0512	22.1145	21.0682	20.893	20.918	21.1316	21.4171	21.2813	21.3385	21.4151	21.1028	21.0983	21.5168	21.6723	21.0866	20.9565	21.8086	21.8034	21.2314	21.2853	21.1937	21.3688	21.5711	21.2649	21.2444	21.3062	21.7779	21.8404	20.6953	20.7183	22.1355	22.0521	21.7621	21.6618	21.5558	21.5632	21.7112	21.7442
CNTN1_HUMAN	TTKPYPADIVVQFK	20.67	0.063	0.45	0.6526	0.21	0.6526	21.0148	20.7987	21.0329	20.9506	20.3894	20.3815	20.8275	20.7125	20.6853	20.6212	20.607	20.7011	20.3369	20.2629	20.8847	20.8983	20.5167	20.4516	21.1169	20.9308	20.4191	20.3559	20.2439	20.3458	20.7244	20.8065	20.6492	20.231	20.831	20.8047	20.0655	20.0388	21.1724	21.0303	20.9769	21.0243	20.8951	20.8006	20.7875	20.6648
CNTN1_HUMAN	YSMVGGNLVINNPDK	19.47	0.145	0.94	0.35126	0.89	0.35126	19.6451	19.773	19.7536	19.9151	19.2783	19.3463	19.3372	19.3599	19.638	19.7111	19.2443	19.5033	18.8665	19.2379	19.6848	19.7115	19.4271	19.4412	20.0052	20.0093	19.1572	19.3593	19.061	19.2127	19.408	19.6769	19.0636	18.8626	19.5762	19.5499	18.6636	18.6402	19.8761	20.0724	19.6329	19.6087	19.7148	19.5599	19.6369	19.6526
CNTN1_HUMAN	NDGGIYTCFAENNR	19.94	0.168	0.65	0.52897	0.42	0.52897	20.1363	20.0267	NA	NA	20.3121	20.2099	NA	NA	NA	NA	NA	NA	NA	NA	19.9042	19.827	19.8195	19.8109	NA	NA	NA	NA	NA	NA	NA	20.0495	NA	NA	NA	NA	NA	NA	NA	NA	NA	NA	NA	19.795	19.6713	19.6924
CNTN1_HUMAN	TDGAAPNVAPSDVGGGGGR	18.26	0.202	0.85	0.39903	0.73	0.39903	18.1832	18.5159	16.9592	17.4655	18.6243	18.7222	18.7849	18.4901	18.6082	18.6628	17.6945	17.8354	17.7435	17.8518	18.7706	18.2988	19.0031	19.1156	18.9903	18.9724	17.7861	17.8378	18.2062	18.0491	18.3869	18.6367	17.2499	18.0478	18.1527	18.1197	18.2364	17.95	18.779	18.877	18.3319	18.6957	18.3292	17.881	17.776	17.9317
CNTN1_HUMAN	AVDLIPWMEYEFR	17.81	0.033	0.07	0.94159	0.01	0.94159	17.2058	17.1295	19.2131	18.7879	NA	NA	16.4915	17.2035	17.8817	17.436	18.6501	18.5636	18.0377	17.2689	18.2475	19.2454	NA	NA	16.863	16.9557	16.1553	16.0428	16.5758	16.2377	17.5324	17.47	17.7441	17.9609	18.747	18.6828	17.6403	17.3035	19.0414	18.9702	19.1456	18.6874	18.431	19.2952	16.5305	17.6308
CNTN1_HUMAN	ILALAPTFEMNPMKK	18.94	-0.056	-0.26	0.79738	0.07	0.79738	19.3929	19.2938	19.612	19.6148	18.6262	18.378	18.7315	18.8095	18.6731	18.599	18.8156	18.3156	18.4701	18.287	19.0983	19.1899	18.7092	18.8193	19.4524	19.3619	18.8917	19.0554	18.7132	18.7101	19.4127	19.1217	18.5976	18.4975	19.4509	19.1737	18.1567	17.6412	19.399	19.416	19.4625	19.5321	18.7158	19.5143	19.0066	18.9033
CNTN1_HUMAN	WLLNEFPVFITMDK	18.66	0.018	0.05	0.9636	0	0.9636	18.301	18.0983	20.4304	19.8878	16.8952	NA	17.3704	18.2551	19.1211	18.4924	19.0859	19.3193	18.7523	18.2124	19.3045	19.7989	NA	NA	18.5641	18.3303	17.7025	17.1618	17.4724	17.9138	18.0712	17.7537	19.4597	19.8848	19.7269	19.6177	17.7496	18.0079	19.3664	19.2463	18.9501	18.5192	18.7884	19.5609	18.2809	19.0353
CNTN1_HUMAN	VLEPMPSTAEISTSGAVLK	20.87	0.081	0.5	0.62152	0.25	0.62152	21.1159	21.1793	21.1203	21.271	20.754	20.7237	20.6446	20.7829	21.0967	20.9937	20.8436	20.3574	20.5857	20.5306	20.878	21.0503	20.8373	20.8546	21.4402	21.1249	20.5146	20.7419	20.3276	20.6223	20.9298	20.9727	20.5003	20.3775	21.0536	21.0208	20.153	20.0815	21.4603	21.3872	21.2234	21.233	21.1269	20.8069	21.059	20.9764
CNTN1_HUMAN	KVLEPMPSTAEISTSGAVLK	20.28	0.127	0.81	0.4213	0.66	0.4213	20.6307	20.5567	20.6201	20.6993	19.9851	20.1603	20.2765	20.446	20.5022	20.2962	20.039	20.3191	19.6667	19.791	20.2844	20.4373	20.4373	20.2694	20.6739	20.8085	20.0309	20.0967	19.8134	20.0995	20.3788	20.3163	20.0491	19.9054	20.5331	20.3152	19.3151	19.5386	20.6062	20.755	20.7441	20.6321	20.2294	20.4252	20.2844	20.292
CNTN1_HUMAN	GMVLLCDPPYHFPDDLSYR	20.84	-0.363	-1.57	0.12367	2.47	0.12367	20.9863	20.954	21.1502	21.2421	20.5347	20.3192	20.5041	20.5164	20.6537	20.8652	20.8704	20.7579	20.5858	20.3718	21.0381	21.2844	19.3568	18.7242	21.2338	21.1788	20.9827	20.6332	20.4919	20.4412	21.226	20.976	20.3612	20.6599	21.3343	21.4054	20.1453	20.1933	21.8186	21.7427	21.7917	21.5049	21.1953	21.5539	20.9478	20.9901
CNTN1_HUMAN	IFNIQLEDEGIYECEAENIR	17.66	-0.436	-0.69	0.49656	0.48	0.49656	16.9934	17.519	17.2247	NA	NA	17.5077	17.7143	NA	16.6882	NA	NA	NA	NA	NA	18.2961	17.3225	NA	NA	18.4326	16.9859	17.5389	NA	NA	NA	NA	NA	NA	NA	NA	NA	NA	NA	19.1451	18.1884	17.7597	NA	18.2477	17.1207	17.9016	17.3164
CNTN1_HUMAN	GFGPIFEEQPINTIYPEESLEGK	20.97	-0.076	-0.38	0.70596	0.14	0.70596	21.0639	21.4654	21.141	21.3979	20.6827	20.7648	20.7402	20.8522	21.1017	21.2111	21.0136	21.1426	20.7619	20.7199	21.0749	21.3542	20.1687	19.8188	21.1713	21.017	20.7686	20.8065	20.402	20.4044	21.2175	21.1509	20.476	20.943	21.0942	21.0744	20.3929	20.5162	21.7453	21.5964	21.5397	21.3978	21.0278	21.4115	20.8087	21.4016
CNTN1_HUMAN	STEATLSFGYLDPFPPEERPEVR	21.36	-0.114	-0.49	0.62986	0.24	0.62986	21.6625	21.5594	21.5388	21.6889	21.186	21.1691	21.2287	21.3525	21.6199	21.6888	21.3185	21.4895	21.3658	21.4252	21.6312	21.9197	19.9716	19.0404	21.6466	21.5897	21.1887	20.9896	20.9818	21.0139	21.4373	21.3723	20.9179	21.181	21.6567	21.733	20.7826	21.1628	22.1868	22.1658	21.6351	21.6868	21.3933	21.7968	21.417	21.6678
CNTN1_HUMAN	GDGPYSLVAVINSAQDAPSEAPTEVGVK	19.63	0.043	0.18	0.8586	0.03	0.8586	19.7764	20.2296	19.3075	19.7015	19.3399	19.4841	19.0167	19.4769	19.5855	19.7069	19.4976	19.6324	19.1866	19.3309	19.8876	20.116	19.8127	19.62	20.089	20.193	19.2237	19.4007	18.8556	19.1495	19.8152	19.7352	18.44	18.734	19.9585	20.016	18.5755	19.0779	20.6594	20.6498	20.4963	20.2311	19.4314	20.0215	19.6516	20.0153
CNTN2_HUMAN	VEVLAGDLR	18.78	0.34	1.86	0.07048	3.46	0.07048	19.107	19.1909	18.8096	18.6124	19.2639	19.4092	18.1251	NA	18.5925	18.5397	18.8919	18.8037	18.757	18.7645	19.4251	19.1405	19.3462	19.3804	19.0577	18.9138	17.9815	18.0534	19.0641	19.2885	18.326	18.5869	18.1904	NA	18.7679	18.2861	18.6583	18.4353	18.7557	18.6002	18.5085	18.0225	18.7452	18.7486	19.1963	19.1045
CNTN2_HUMAN	GFDNHSPIAK	16.24	0.558	0.93	0.38524	0.86	0.38524	16.1421	NA	NA	NA	NA	NA	NA	NA	NA	NA	NA	NA	NA	NA	16.7635	NA	16.6262	16.3412	15.8291	NA	NA	NA	NA	NA	NA	NA	NA	NA	NA	NA	NA	NA	NA	NA	NA	NA	NA	NA	15.7497	NA
CNTN2_HUMAN	GPPGPPGGVVVR	17.81	0.483	1.82	0.07539	3.33	0.07539	17.895	18.5046	18.1895	18.1673	18.5917	18.7886	16.9098	16.2599	17.6027	17.801	17.9563	17.8222	17.6152	17.872	18.3862	18.5015	18.8752	19.0335	18.0343	18.2523	16.8034	16.6374	18.3495	17.875	17.458	17.8126	17.0936	16.5359	17.8917	17.8255	16.9243	17.4405	17.5078	17.6056	17.6096	17.306	17.9092	17.979	18.4985	18.3374
CNTN2_HUMAN	FGFLQEFSK	18.77	0.518	0.8	0.46047	0.64	0.46047	NA	NA	NA	NA	NA	NA	NA	NA	NA	NA	NA	NA	NA	NA	NA	19.2042	NA	NA	NA	NA	NA	NA	NA	NA	NA	NA	NA	NA	NA	NA	NA	NA	NA	18.9133	18.5354	18.4149	NA	NA	NA	NA
CNTN2_HUMAN	GGEILIPCQPR	18.87	0.226	1.1	0.28057	1.2	0.28057	19.2148	19.4133	18.7007	18.9046	19.4357	19.4058	18.066	NA	18.5695	18.6059	18.8299	18.6807	18.5042	18.8081	19.1737	19.3817	19.4001	19.6298	18.9556	18.9748	NA	NA	19.1232	19.4178	NA	NA	NA	NA	18.5152	18.594	18.2576	18.3759	18.4391	18.7731	18.4666	18.2953	18.9535	18.5499	19.1273	19.1375
CNTN2_HUMAN	VTVTPDGTLIIR	19.63	0.302	1.36	0.18144	1.85	0.18144	20.2206	20.4239	19.7754	19.3568	20.1343	20.1875	18.7817	19.2471	19.4526	19.366	19.3118	19.6926	19.3605	19.7802	19.9476	20.2347	20.1847	20.4275	19.6307	19.8605	18.9738	19.1598	19.7863	20.1822	19.4495	19.7516	19.2302	NA	19.2836	19.3318	18.9745	19.3325	19.1707	19.6775	19.3429	19.0947	19.236	19.5335	20.205	20.3484
CNTN2_HUMAN	IIVQAQPEWLK	19.82	0.226	1.6	0.11788	2.55	0.11788	20.1087	20.1444	20.0192	19.8084	20.0216	20.1266	20.0084	19.9683	19.4706	19.4909	19.9826	19.9044	19.6746	19.899	20.1842	20.126	20.164	20.2967	19.5686	19.6315	18.84	19.1493	19.6036	19.9452	19.611	19.6402	19.5655	19.6974	19.58	19.4582	19.7317	19.732	19.606	19.7179	19.8527	19.8872	20.1082	19.8797	20.2812	20.1969
CNTN2_HUMAN	FAQLNLAAEDTR	18.52	0.457	1.19	0.24203	1.41	0.24203	19.437	19.4826	18.4182	18.7634	19.0252	19.3208	16.3107	NA	18.7362	18.8476	18.4314	18.8747	18.5636	18.9855	19.1208	19.1389	19.1889	19.7599	19.0157	17.9874	17.8114	18.3439	19.0431	17.8036	18.3257	17.0429	17.443	17.2648	18.4805	18.3869	18.0131	18.3168	18.4104	18.9146	17.754	17.75	18.4973	18.5073	19.2922	19.5239
CNTN2_HUMAN	YTCFAENFMGK	17.89	0.509	2.74	0.01031	7.49	0.01031	NA	18.2859	18.1546	18.2191	NA	18.0403	NA	NA	17.8068	17.7575	17.7722	18.0973	NA	17.881	18.4858	18.6229	18.1813	18.1647	18.2064	18.4443	17.2181	17.2892	18.4155	18.5874	NA	17.1614	17.0725	17.3518	18.147	NA	NA	NA	17.6547	17.6974	17.2753	17.4059	17.6303	17.7449	NA	NA
CNTN2_HUMAN	VISDTEADIGSNLR	19.49	0.205	0.7	0.49769	0.49	0.49769	19.5405	19.4892	NA	NA	19.5152	19.5157	NA	NA	NA	NA	NA	NA	NA	NA	NA	NA	19.652	19.7741	NA	NA	NA	NA	NA	19.6645	NA	NA	19.2405	NA	NA	NA	NA	NA	NA	NA	NA	NA	NA	NA	19.2528	19.2175
CNTN2_HUMAN	ETIGDLTILNAQLR	18.38	0.455	2.46	0.01829	6.04	0.01829	19.0361	19.1771	18.3828	18.6018	19.2894	19.2539	17.5701	17.6879	18.1016	18.3612	18.4209	18.5744	18.2975	18.2237	19.1439	18.8835	18.9573	18.9055	18.6491	18.6109	17.4674	17.5647	18.7324	18.6544	18.1209	17.902	18.152	17.9741	18.3768	18.4221	17.7834	17.5011	18.3193	18.526	17.7133	17.7086	18.0974	18.0626	19.0947	18.8488
CNTN2_HUMAN	YTCMAQTVVDSASK	18.38	0.503	2.92	0.0059	8.54	0.0059	19.0938	18.8464	18.6878	18.6059	18.4992	18.6031	NA	NA	18.288	18.1993	18.4226	18.4535	17.97	18.1553	18.9975	19.0071	19.1461	19.1229	18.7542	18.659	17.3058	17.7388	18.6893	18.638	17.999	NA	17.6371	17.9217	18.3574	18.3726	17.7999	17.7786	18.4161	18.1949	18.0318	17.9897	18.2821	18.0788	NA	18.7863
CNTN2_HUMAN	HQLVGGNLVIMNPTK	18.32	0.518	0.77	0.44946	0.59	0.44946	18.8614	18.4528	18.8428	18.8783	18.1868	17.9108	18.4424	NA	NA	18.5421	18.4996	18.2488	18.1969	18.1006	19.5176	19.1614	18.5459	18.2086	18.8552	18.7113	NA	NA	18.9306	NA	NA	NA	17.6991	13.6959	18.4368	18.4467	17.7738	NA	18.661	18.4091	18.5681	17.7372	NA	18.4515	18.4534	18.3742
CNTN2_HUMAN	VIASNILGTGEPSGPSSK	20.74	0.171	0.46	0.65048	0.21	0.65048	21.4953	21.1369	21.6932	21.5637	20.509	20.321	21.3118	21.0991	20.8286	20.7978	20.4904	20.2682	20.2643	20.4466	20.6274	20.6689	20.7499	20.7377	20.715	20.7777	20.8044	20.8416	20.4727	20.534	20.6333	20.4071	19.9536	19.9733	21.2079	21.1171	19.9388	17.491	21.1484	20.9682	21.5265	21.5029	21.3132	21.2215	21.0084	21.0135
CNTN2_HUMAN	EYQNGDGFGYLLSFR	16.61	0.789	1.36	0.20492	1.84	0.20492	NA	NA	NA	NA	16.2637	NA	NA	NA	NA	NA	NA	NA	NA	NA	17.3379	NA	NA	NA	17.4542	NA	NA	15.1209	16.357	16.263	16.052	NA	NA	NA	NA	NA	NA	NA	NA	NA	NA	NA	NA	NA	17.0517	17.6292
CNTN2_HUMAN	WLLNEFPNFIPTDGR	17.79	0.238	0.4	0.69968	0.16	0.69968	17.2821	17.7487	NA	NA	NA	NA	NA	NA	NA	NA	NA	NA	NA	NA	18.5086	NA	NA	NA	NA	NA	NA	NA	17.649	17.8513	17.2845	NA	18.3283	NA	NA	NA	17.5293	NA	NA	NA	NA	NA	NA	NA	17.4376	18.3133
CNTN2_HUMAN	LSLEDSGMYQCVAENK	17.65	0.149	0.48	0.64012	0.23	0.64012	17.4238	18.1709	NA	NA	17.5243	NA	NA	NA	17.1023	NA	NA	NA	NA	NA	17.7752	17.8993	17.9633	17.9432	17.6932	17.7511	NA	NA	17.503	17.8163	NA	NA	NA	NA	17.2705	NA	NA	NA	17.4123	17.396	NA	NA	NA	NA	17.5499	17.8681
CNTN2_HUMAN	RGDGPESLTALVYSAEEEPR	18.63	0.423	2.1	0.04242	4.43	0.04242	19.5506	19.5085	NA	18.8671	19.2109	19.2416	18.163	18.225	18.1012	18.2346	18.8239	18.522	18.7072	18.5869	19.077	19.2027	18.7976	18.7163	18.5314	18.8512	17.2694	NA	18.6913	19.0624	18.2003	18.2727	NA	18.0891	18.3424	18.4401	18.0081	18.2209	18.6177	18.7701	NA	NA	18.2633	18.4594	19.0555	19.2548
CNTN2_HUMAN	AQDAGVYQCLASNPVGTVVSR	18.69	0.196	0.67	0.51312	0.45	0.51312	19.1064	NA	18.5931	NA	NA	NA	NA	NA	NA	NA	18.5909	18.8023	18.2201	NA	NA	19.3241	NA	NA	18.645	19.0654	NA	NA	18.8755	19.2409	NA	NA	17.8489	18.2159	18.4053	NA	NA	NA	NA	NA	18.6074	NA	NA	18.5019	19.0227	NA
CNTN2_HUMAN	NWIEIPVPEDIGHALVQIR	19.07	-0.167	-0.45	0.65827	0.2	0.65827	19.6529	19.2175	20.3033	20.0529	18.4947	18.0316	17.9264	17.9467	19.2899	19.2316	19.7327	19.6697	19.6237	19.2727	20.1959	20.3152	15.5811	NA	18.8567	18.848	18.1187	17.3585	18.8262	18.8888	17.7979	17.7643	19.7056	19.7431	19.7746	19.5219	18.9883	18.8388	19.5717	19.4067	19.4866	19.1459	19.6838	19.9622	19.3429	19.7342
CNTN2_HUMAN	TNPANIEGNAETAQVLGLTPWMDYEFR	17.17	0.306	0.8	0.42775	0.65	0.42775	17.3641	NA	17.8597	17.8771	NA	NA	NA	15.7936	16.7372	NA	17.4196	17.8862	17.2098	16.6493	17.8494	18.147	NA	NA	17.0331	17.2042	NA	NA	16.7262	16.7551	15.2269	NA	16.9296	17.5233	17.2298	17.4726	NA	16.3654	17.3912	17.5255	16.4568	NA	16.7866	17.7727	17.3529	18.1096
CNTP2_HUMAN	SPTPLNDDQWHR	18.33	-0.028	-0.14	0.88699	0.02	0.88699	18.5678	18.176	NA	17.8702	18.311	18.1155	18.4882	18.5226	18.2893	NA	18.769	18.6824	18.6917	18.4256	18.4287	18.5598	18.5196	18.296	17.5962	17.4814	17.4236	17.5191	18.1231	17.7234	18.9411	18.8801	18.6912	19.0148	NA	NA	18.5443	18.4578	18.2291	18.4379	18.4157	18.5719	18.6843	18.4708	18.0694	17.7262
CNTP4_HUMAN	DGAGGWSPLVSNK	18.4	NA	NA	NA	NA	NA	18.401	NA	NA	NA	NA	NA	NA	NA	NA	NA	NA	NA	NA	NA	NA	NA	NA	NA	NA	NA	NA	NA	NA	NA	NA	NA	NA	NA	NA	NA	NA	NA	NA	NA	NA	NA	NA	NA	NA	NA
CNTP4_HUMAN	AQVTPEVQPGCR	15.81	1.076	1.49	0.18614	2.23	0.18614	NA	NA	NA	NA	NA	NA	NA	NA	NA	NA	NA	NA	NA	NA	NA	NA	15.4376	15.8333	16.3868	16.4245	NA	NA	NA	NA	NA	NA	NA	NA	NA	NA	NA	NA	14.945	NA	NA	NA	NA	NA	NA	NA
CO1A1_HUMAN	SLSQQIENIR	18.37	1.383	1.26	0.22023	1.59	0.22023	19.3803	19.5252	NA	NA	19.0892	19.1907	15.2202	19.36	NA	NA	18.9245	NA	NA	18.8308	NA	19.3026	19.6098	19.5815	NA	19.2613	13.9409	NA	NA	19.3631	NA	19.2293	NA	NA	NA	NA	NA	NA	15.3366	14.8624	18.5578	18.8163	NA	NA	19.14	19.2392
CO1A1_HUMAN	VLCDDVICDETK	19.58	0.028	0.07	0.9463	0	0.9463	19.6147	NA	18.8507	18.4602	20.3934	20.0361	20.1337	20.2557	19.0785	18.766	19.9933	20.6333	19.9016	19.4094	19.4711	19.5557	19.8689	19.6702	19.086	19.0336	18.8366	18.6422	19.3562	19.1651	20.1752	19.6004	20.2996	19.9632	17.6785	18.4246	19.9631	19.9296	18.7598	19.4728	18.5678	20.2923	22.3336	22.0522	18.9524	18.8036
CO1A1_HUMAN	STGGISVPGPMGPSGPR	17.92	1.473	2.09	0.09144	4.36	0.09144	NA	NA	NA	18.4475	NA	NA	NA	NA	NA	NA	NA	NA	NA	NA	NA	NA	NA	NA	NA	18.8752	NA	NA	NA	NA	NA	NA	NA	NA	NA	16.4394	NA	NA	NA	NA	NA	17.9363	NA	NA	NA	NA
CO1A1_HUMAN	SGEYWIDPNQGCNLDAIK	17.37	0.26	0.53	0.60822	0.28	0.60822	18.1941	17.8874	NA	NA	NA	16.3346	NA	NA	NA	NA	NA	17.0834	NA	NA	17.7884	NA	17.5769	NA	NA	NA	NA	NA	NA	NA	NA	NA	NA	NA	NA	NA	17.8054	NA	NA	NA	NA	16.5425	NA	16.2881	18.0717	17.4775
CO1A2_HUMAN	GVGLGPGPMGLMGPR	15.92	NA	NA	NA	NA	NA	NA	NA	15.908	15.9221	NA	NA	NA	NA	NA	NA	NA	NA	NA	NA	NA	NA	NA	NA	NA	NA	NA	NA	NA	NA	NA	NA	NA	NA	NA	NA	NA	NA	NA	NA	NA	NA	NA	NA	NA	NA
CO1A2_HUMAN	GETGPSGPVGPAGAVGPR	14.54	0.381	0.62	0.55095	0.39	0.55095	NA	NA	NA	NA	NA	NA	NA	NA	14.1574	NA	NA	NA	NA	NA	15.0905	NA	14.8429	NA	NA	14.3064	NA	NA	NA	NA	NA	NA	NA	NA	NA	NA	14.7823	15.2629	NA	NA	NA	NA	NA	13.3506	NA	NA
CO2_HUMAN	DFHINLFR	15.9	-0.011	-0.03	0.97699	0	0.97699	NA	16.2017	14.175	NA	NA	NA	NA	15.7739	15.6785	NA	16.9048	16.4616	16.7228	16.4999	15.7622	15.3043	NA	NA	15.4626	NA	16.2933	16.1909	NA	13.9593	16.7574	16.8572	15.922	15.5932	16.1884	15.783	17.2374	16.8634	NA	NA	14.9441	14.8389	15.4209	15.5741	NA	NA
CO2_HUMAN	HAFILQDTK	17.69	0.23	0.73	0.46667	0.54	0.46667	17.7886	17.8817	16.599	17.1496	17.7901	17.8704	18.0608	16.601	17.8256	17.9498	18.1685	18.08	18.2077	18.2563	18.1219	17.6256	17.69	17.8409	18.1692	18.1382	17.9334	17.7477	17.5505	16.7868	18.0233	18.3907	16.8223	16.8219	18.0571	17.9869	18.089	18.794	16.89	17.3166	16.8449	17.2283	18.072	17.8428	NA	16.9629
CO2_HUMAN	HAIILLTDGK	19.84	-0.044	-0.27	0.78918	0.07	0.78918	20.2513	19.9182	19.8445	19.7271	19.7486	19.9351	19.6034	19.5503	19.9369	19.8452	19.7006	19.6708	19.413	19.4083	19.6677	19.7361	20.1537	20.3568	19.9835	19.8375	20.0449	20.0775	19.1607	19.378	20.0809	20.0212	19.4941	19.0944	20.3345	20.0988	19.1963	19.1887	20.3152	20.0986	20.3548	20.0917	20.3811	20.234	19.754	19.7708
CO2_HUMAN	VLMSVLNDNSR	17.48	0.123	0.41	0.68887	0.17	0.68887	NA	17.8183	17.1112	17.0914	NA	17.4118	NA	NA	17.5947	17.434	NA	NA	NA	NA	17.5279	17.267	17.5545	17.7325	NA	17.7934	17.6072	17.7661	NA	16.5907	17.8927	NA	NA	NA	NA	NA	NA	NA	NA	NA	NA	NA	NA	NA	NA	NA
CO2_HUMAN	SSGQWQTPGATR	17.1	0.625	1.03	0.31377	1.07	0.31377	NA	17.6758	NA	NA	17.7576	18.3089	NA	NA	16.502	NA	NA	NA	NA	NA	16.696	16.6389	17.5087	18.9409	NA	17.0526	17.1548	18.0189	NA	18.0829	16.7266	16.4438	NA	16.1367	NA	16.3453	16.1497	17.423	NA	NA	NA	NA	NA	14.8989	NA	17.4829
CO2_HUMAN	RNDYLDIYAIGVGK	15.24	-1.678	-2.81	0.0159	7.87	0.0159	NA	NA	NA	NA	15.7227	15.6148	15.2929	14.8562	NA	NA	NA	NA	13.9975	NA	14.5739	NA	14.9884	14.6642	14.8708	NA	NA	NA	NA	NA	NA	NA	NA	NA	NA	NA	16.5922	16.4614	NA	NA	NA	NA	NA	NA	NA	NA
CO2_HUMAN	NQGILEFYGDDIALLK	17.66	0.087	0.19	0.85251	0.04	0.85251	16.6965	17.0889	18.5904	18.3301	17.4526	17.7086	17.1999	17.7787	17.8912	17.8038	18.8377	18.5647	18.5057	17.6657	18.4308	18.6001	NA	NA	15.8097	15.729	15.7476	15.5553	16.6803	16.8358	17.3328	17.2478	18.0758	17.6591	17.6587	17.7847	17.9745	17.7599	18.7664	18.3974	19.301	18.9244	18.779	19.42	15.2464	17.2085
CO2_HUMAN	ECQGNGVWSGTEPICR	16.92	0.806	0.98	0.35817	0.95	0.35817	NA	17.1167	NA	NA	NA	NA	NA	NA	NA	NA	16.705	17.5449	NA	NA	NA	16.9447	NA	16.2872	NA	17.6089	NA	NA	NA	NA	NA	NA	NA	16.2119	NA	NA	NA	NA	NA	NA	NA	NA	NA	NA	NA	NA
CO2_HUMAN	KNQGILEFYGDDIALLK	17.72	0.111	0.25	0.80725	0.06	0.80725	NA	17.6822	NA	NA	NA	NA	NA	NA	NA	17.4729	17.9147	18.0456	NA	NA	NA	NA	NA	NA	NA	NA	NA	NA	NA	NA	NA	NA	NA	NA	17.8885	NA	NA	NA	NA	17.3275	NA	NA	NA	NA	NA	NA
CO2_HUMAN	GALISDQWVLTAAHCFR	18.87	-0.255	-1.1	0.27858	1.21	0.27858	18.8035	19.0358	NA	18.7279	18.6435	18.6679	18.6064	18.5516	18.7347	19.0175	19.6771	19.5951	19.4223	18.9684	18.8099	18.9635	17.0819	NA	18.595	18.3364	19.1632	18.8562	17.9948	17.8046	19.1489	18.9674	18.7071	18.8944	19.5149	19.5387	19.4044	19.3057	18.8006	18.5263	19.1248	NA	19.2434	19.3573	NA	NA
CO3_HUMAN	GVFVLNKK	19.86	-0.238	-0.89	0.3802	0.79	0.3802	19.2264	18.7731	19.9323	19.3489	19.9256	19.6308	20.025	19.4139	19.1432	19.3812	20.1692	19.7992	20.3223	NA	19.7854	19.6153	20.2983	19.8706	20.282	19.809	20.6439	20.4489	20.3281	19.58	19.9627	19.6319	20.6933	20.329	20.1305	19.7821	20.3445	20.1837	19.6137	19.3524	19.9139	19.6182	19.7893	20.228	19.9197	19.2595
CO3_HUMAN	GLEVTITAR	17.95	-0.16	-0.24	0.81417	0.06	0.81417	17.4931	16.3151	NA	NA	18.0573	17.3469	18.0322	16.9888	NA	NA	19.2291	NA	19.1525	18.5529	18.5067	17.0254	18.0327	16.8385	18.8329	17.6926	19.0745	18.5518	18.6569	17.8667	17.8528	17.5915	17.2587	17.4678	18.5358	16.4945	NA	17.115	19.2241	NA	NA	NA	19.4912	NA	18.2649	16.8625
CO3_HUMAN	TGLQEVEVK	22.45	-0.16	-0.88	0.38511	0.77	0.38511	21.4185	21.9408	22.0701	22.2638	22.4421	22.6205	22.3601	21.8796	22.2224	22.3444	22.5772	22.5906	22.5349	22.6408	22.3173	22.2271	22.6745	22.8591	22.6729	22.8393	22.8679	22.9658	22.8239	22.4085	22.1622	22.4217	22.5612	22.7635	22.2555	22.3781	22.5536	22.9784	22.3248	22.5218	22.3702	22.5273	22.8602	22.5241	22.1949	22.2388
CO3_HUMAN	FISLGEACK	22.18	-0.155	-1.14	0.26119	1.3	0.26119	21.6924	21.7122	21.6143	21.7705	22.0328	22.0342	22.1389	22.0806	22.0283	22.0122	22.6215	22.6477	22.2467	22.3879	22.0559	21.9994	22.2162	22.2638	22.2238	22.2179	22.5959	22.7098	22.4069	22.5545	21.9857	22.1163	22.8604	22.6765	22.2246	22.0049	22.5442	22.6695	22.0149	21.9459	21.9765	21.8151	22.2176	22.0251	21.9101	21.8344
CO3_HUMAN	RQGALELIK	20.92	-0.206	-0.85	0.39885	0.73	0.39885	20.2866	19.9334	20.868	20.5904	20.8183	20.7193	21.1288	20.5125	20.423	20.7387	21.3563	21.2692	21.2339	20.9813	20.8416	20.7735	21.154	20.5241	21.2501	20.9588	21.6179	21.1022	21.3729	20.4396	21.0126	20.7907	21.2914	21.5878	21.0619	21.0044	21.0814	21.3694	20.9546	20.7808	20.8953	20.948	21.1445	21.1361	20.6861	20.1945
CO3_HUMAN	ISLPESLKR	17.83	-0.353	-1.64	0.11158	2.68	0.11158	17.046	17.0032	NA	NA	17.4574	17.7366	17.2661	17.5394	17.4961	17.5974	18.5701	18.6162	18.1844	17.9623	16.6436	17.1668	18.0236	17.9343	17.808	17.7985	18.5422	18.5842	17.8245	17.9011	NA	17.6188	18.5905	NA	17.7616	NA	18.484	18.4664	NA	17.5777	NA	NA	NA	17.7649	17.9787	17.6855
CO3_HUMAN	DSCVGSLVVK	21.7	-0.162	-0.59	0.55817	0.35	0.55817	21.209	21.3367	20.7574	21.1011	21.8786	21.9924	21.4215	21.3916	21.5072	21.4312	21.6681	21.9297	21.4542	21.6786	21.6934	21.4751	22.0682	22.2582	22.0412	22.1785	22.3041	22.6504	22.3168	22.3566	21.4085	21.6283	21.323	21.9355	21.495	21.6053	21.892	22.1745	21.7552	21.884	21.7117	21.593	22.1444	20.5014	21.4822	21.559
CO3_HUMAN	ADIGCTPGSGK	19.3	0.048	0.18	0.85899	0.03	0.85899	17.7412	18.0843	19.0481	19.1273	19.6287	19.5499	19.4192	19.1468	19.4511	19.112	19.4576	20.0643	19.4184	19.5978	19.5402	19.1235	19.6826	20.1375	19.442	19.6517	19.077	19.7567	19.9926	20.0455	18.1453	18.4664	19.9776	19.968	19.049	19.1498	19.7713	19.9226	19.0904	19.2521	19.1303	19.2425	19.9815	19.271	18.0188	18.1471
CO3_HUMAN	GYTQQLAFR	21.98	-0.004	-0.02	0.98163	0	0.98163	21.7584	21.7463	21.4838	21.5351	22.5023	22.4237	21.9735	21.957	21.5932	21.5088	21.9112	21.9226	22.2577	22.212	22.157	22.1345	22.2178	22.3203	22.0303	21.9531	21.7914	21.9572	21.8427	22.1491	22.2058	22.3025	22.6611	22.4817	21.3099	21.1299	22.5047	22.405	21.2491	21.2183	21.7365	21.5028	22.0888	22.2333	22.593	22.3115
CO3_HUMAN	NTLIIYLDK	20.66	-0.291	-1.8	0.07918	3.24	0.07918	19.6222	20.0344	20.9063	21.0301	20.0654	20.0831	20.4569	20.4167	20.5559	20.5071	21.0805	20.7188	20.8341	20.9133	20.5521	20.5842	20.172	20.1852	20.9194	20.7416	21.1201	21.119	20.9385	20.8503	20.0523	20.3364	21.4648	21.466	20.935	20.7836	21.06	20.9799	20.7847	20.6815	20.4131	20.3699	20.8326	20.6977	20.7165	20.5908
CO3_HUMAN	VLLDGVQNPR	21.31	0.113	0.51	0.61244	0.26	0.61244	21.2263	21.4996	21.2936	21.2476	NA	NA	21.6965	21.5715	20.4775	20.6105	21.9516	22.0451	21.8845	21.967	21.7075	21.4348	20.9196	21.0775	21.0421	21.0464	22.3495	22.4592	21.1804	21.1035	20.563	20.5471	20.6357	20.9829	20.5568	20.6642	22.0206	22.2219	20.7593	20.7729	20.5008	20.566	22.1257	21.9445	21.6502	21.5794
CO3_HUMAN	LCRDELCR	17.88	-0.079	-0.32	0.74833	0.1	0.74833	NA	NA	17.6288	17.7958	NA	NA	17.5252	17.436	17.874	17.6854	17.6738	18.0617	17.3955	17.7601	17.2514	18.0532	17.8989	17.691	18.5586	18.7429	18.2312	18.5546	18.0492	18.3662	NA	16.9363	18.5898	18.4881	18.0001	17.8626	NA	18.0726	NA	18.0704	NA	17.6053	NA	17.7349	17.2843	17.4478
CO3_HUMAN	FYYIYNEK	16.89	-0.349	-0.95	0.35805	0.9	0.35805	NA	NA	NA	15.5864	NA	NA	NA	NA	16.043	NA	NA	16.8525	NA	NA	NA	NA	17.409	17.6723	17.0951	16.9122	17.2991	17.5463	NA	NA	NA	NA	NA	NA	NA	NA	17.1841	NA	16.5401	16.6287	NA	NA	17.2831	NA	NA	16.395
CO3_HUMAN	HQQTVTIPPK	18.23	-0.172	-0.85	0.398	0.73	0.398	17.0549	17.2229	18.1352	18.2784	17.8603	17.6636	18.4679	18.1016	17.9268	18.3773	18.6288	18.5391	18.3321	18.3305	17.9837	17.7294	18.3814	18.4911	18.7681	18.5143	18.7911	18.7704	18.4388	18.4375	17.5096	17.4722	18.8739	18.7557	17.9403	18.1398	18.4941	18.9348	18.132	18.3329	18.401	18.5231	18.7517	18.6157	17.5943	17.3217
CO3_HUMAN	QPSSAFAAFVK	21.21	-0.277	-2.08	0.04377	4.33	0.04377	20.4806	20.5398	21.0578	20.9639	20.9089	20.8962	20.9219	20.9806	20.8908	20.8007	21.591	21.6472	21.4511	21.3611	20.789	20.8685	21.2962	21.4255	21.215	21.2922	21.741	21.7704	21.415	21.5217	20.9767	21.0349	22.0273	21.8012	21.2231	21.2417	21.6774	21.5918	21.1227	21.1567	21.1608	21.2241	21.1973	21.1739	20.9694	20.8869
CO3_HUMAN	FISLGEACKK	17.97	-0.442	-0.95	0.35559	0.91	0.35559	NA	17.0179	NA	NA	17.7858	NA	18.2173	17.1444	NA	NA	NA	NA	NA	NA	NA	NA	18.1361	NA	NA	17.7414	18.761	17.9249	NA	17.0235	18.1979	18.2929	NA	NA	18.2841	18.3109	NA	NA	NA	NA	NA	18.2742	NA	18.4592	NA	NA
CO3_HUMAN	DFDFVPPVVR	21.93	-0.314	-2.23	0.03154	4.96	0.03154	21.3932	21.1015	21.8394	21.7987	21.6292	21.5571	21.3416	21.6276	21.5171	21.6247	22.2689	22.2451	22.124	22.0072	21.7031	21.8042	22.078	22.1195	21.9075	21.8038	22.4015	22.5133	22.0074	22.1009	21.793	21.8042	22.5322	22.6067	22.0173	21.9839	22.3584	22.1608	22.0589	22.0323	21.9988	21.9242	21.9244	22.1673	21.8288	21.5475
CO3_HUMAN	YYTYLIMNK	22.23	-0.354	-0.4	0.69365	0.16	0.69365	21.8498	21.589	22.2208	22.1643	NA	18.0344	NA	22.2706	22.2828	22.1751	22.769	22.8306	22.8011	22.6774	NA	22.3731	NA	22.3304	22.7268	22.8081	22.9578	22.9092	22.5544	22.9106	NA	22.2707	23.1606	23.0998	22.4592	22.5436	17.0511	23.1239	22.427	22.3608	22.199	22.278	22.61	22.601	22.3908	22.2321
CO3_HUMAN	IHWESASLLR	22.22	-0.569	-0.47	0.66175	0.22	0.66175	NA	NA	NA	NA	NA	NA	NA	NA	NA	NA	NA	NA	21.8444	NA	NA	NA	NA	NA	NA	NA	NA	NA	NA	NA	NA	NA	22.7725	22.055	NA	NA	NA	NA	NA	NA	NA	NA	NA	NA	NA	NA
CO3_HUMAN	VTIKPAPETEK	20.09	-0.122	-0.64	0.52592	0.41	0.52592	19.3307	19.4176	20.3444	19.9605	19.6311	19.385	20.3131	20.1951	19.9083	19.8212	20.5219	20.6491	20.2899	20.2594	19.5834	19.908	20.4299	20.0367	20.4202	20.2438	20.3212	20.3967	20.2279	20.3954	19.5485	19.6009	21.3441	20.9009	20.1148	19.9782	20.6223	20.3915	20.067	19.8481	19.9384	19.827	20.0205	20.1497	19.5795	19.8107
CO3_HUMAN	QPVPGQQMTLK	20.42	-0.177	-0.79	0.43548	0.62	0.43548	19.4112	19.7757	20.076	20.2424	20.1568	20.2557	20.3452	19.3022	20.1903	20.2872	20.7096	20.5993	20.4955	20.5225	20.3421	20.1906	20.8098	20.7981	21.0645	21.0461	21.109	20.9531	20.8499	20.1568	20.0997	20.21	20.602	20.3771	20.3745	20.4166	20.466	20.9443	20.4754	20.5686	20.3672	20.4401	20.7853	20.5517	20.2387	20.1652
CO3_HUMAN	AELQCPQPAAR	19.21	-0.127	-0.22	0.82376	0.05	0.82376	21.368	21.0784	17.3077	17.4774	19.5471	19.4327	19.5276	19.6694	17.8499	19.4787	20.0101	19.9103	20.4676	20.1046	18.4252	17.7022	17.4185	17.6392	19.4218	19.102	21.4915	21.0307	18.5014	18.5528	21.2517	21.0001	20.2474	19.769	17.21	17.0729	20.5712	20.2954	17.2896	18.6576	18.4845	16.8909	17.7815	17.5695	20.8545	20.9567
CO3_HUMAN	KVLLDGVQNPR	19.74	0.073	0.27	0.79041	0.07	0.79041	19.4356	19.6549	20.1516	20.1094	NA	NA	20.2817	19.6412	18.7038	18.9999	20.6508	20.683	20.5839	20.5426	19.9006	20.1546	19.1361	19.0505	19.2196	19.1137	20.8226	20.8944	19.1897	18.4835	18.8707	18.9221	19.8325	19.6494	19.2184	19.2792	20.6284	20.8383	19.0159	19.0535	19.3001	19.3349	20.3515	20.5189	20.0471	19.8574
CO3_HUMAN	FYHPEKEDGK	17.72	-0.302	-1.04	0.30501	1.08	0.30501	16.3857	16.5658	NA	NA	16.829	16.3845	18.1373	17.8402	17.5468	17.5711	18.5977	18.6721	18.1156	18.1042	16.9799	17.5038	17.7325	17.292	18.0303	17.6488	18.0343	18.0467	17.7987	17.5635	NA	16.9533	19.4371	19.1076	NA	NA	18.4765	18.3465	NA	17.4765	17.8815	17.9223	17.8695	NA	16.9055	17.0655
CO3_HUMAN	NTMILEICTR	19.84	-0.414	-1.95	0.05803	3.8	0.05803	19.0331	18.8663	19.9852	19.8013	19.4782	19.2752	19.6299	19.1812	19.8635	19.745	20.2231	20.1253	19.8856	19.9751	19.7504	19.4749	19.1942	18.8974	20.3502	20.0241	20.6752	20.4244	20.4651	20.1844	19.299	19.3659	21.017	20.7256	20.0842	19.7708	20.2585	20.1576	20.0937	19.8997	19.5007	19.6354	20.2861	19.6835	19.8818	19.6284
CO3_HUMAN	QELSEAEQATR	20.13	-0.062	-0.3	0.76202	0.09	0.76202	19.3116	19.3115	19.5168	19.6877	20.2595	20.2338	20.2783	20.2847	20.1598	19.9167	20.1642	20.6319	20.1255	20.4312	20.0359	19.8001	20.4477	20.7064	20.171	20.4784	20.1129	20.5017	20.6259	20.7407	19.6147	19.7229	20.6749	20.9689	19.8106	19.859	20.3277	20.693	19.7325	19.8727	19.6848	19.8045	20.2117	19.9124	NA	NA
CO3_HUMAN	ENEGFTVTAEGK	20.32	-0.012	-0.07	0.9481	0	0.9481	19.3639	19.7996	19.8446	20.2665	20.037	20.0569	20.5034	20.0591	20.4159	20.5257	20.802	20.8634	20.4884	20.583	20.1551	20.1434	20.4547	20.5228	20.6245	20.6691	20.5071	20.684	20.716	20.3071	19.8295	19.955	21.1065	21.0507	20.2892	20.3064	20.7003	20.9655	20.0692	20.1564	19.6383	19.8701	20.4091	20.0923	19.8411	19.933
CO3_HUMAN	SGSDEVQVGQQR	20.87	0.077	0.31	0.75907	0.1	0.75907	19.4616	19.9926	20.4841	20.7935	20.827	20.8448	21.164	21.1419	20.9352	20.8185	21.1501	21.6405	20.9459	21.2867	20.9416	20.7789	21.1555	21.5348	21.0353	21.2031	20.62	21.2051	21.3949	21.4901	20.0069	20.3644	21.6986	21.919	20.7068	20.7496	21.2365	21.4619	20.3062	20.7589	20.4773	20.6965	21.1281	20.6226	19.8074	19.9449
CO3_HUMAN	CAEENCFIQK	18.7	-0.026	-0.1	0.91853	0.01	0.91853	17.1773	17.7857	18.553	18.9912	18.605	18.6813	18.6446	18.2376	18.8154	18.9326	18.8712	19.1322	18.7452	18.8403	18.9367	18.2909	18.8618	19.0693	19.329	19.3272	19.1907	19.2384	19.1188	18.7392	17.772	17.7934	19.2457	19.5345	18.85	19.0183	18.9595	19.2971	18.7051	18.9839	18.239	18.5011	18.9583	18.4784	17.6311	18.0927
CO3_HUMAN	ACEPGVDYVYK	22.41	-0.096	-0.64	0.52588	0.41	0.52588	21.8929	21.9898	21.9423	22.0315	22.3529	22.305	22.3186	22.5456	22.2111	22.0675	22.6791	22.7516	22.4818	22.4528	22.2338	22.2838	22.7577	22.8762	22.447	22.6692	22.6756	22.9289	22.8774	23.0473	22.113	22.2046	22.998	23.0966	22.1316	22.1896	22.9782	22.9704	22.1493	22.1578	21.9445	21.9387	22.2627	22.1142	22.1516	22.2726
CO3_HUMAN	APSTWLTAYVVK	18.05	-0.154	-0.86	0.39338	0.75	0.39338	18.239	17.6881	18.2451	18.1028	17.6771	NA	18.246	NA	NA	17.5728	17.7873	17.4108	18.2504	17.8832	18.0709	18.184	17.9149	NA	18.3722	18.1758	NA	18.4866	18.5179	18.5274	18.1166	18.0323	18.0425	17.9807	17.7591	17.7693	18.289	17.9893	18.3057	18.2929	17.6363	17.2801	18.4919	18.4322	17.9627	18.024
CO3_HUMAN	EVVADSVWVDVK	20.14	-0.114	-0.46	0.64537	0.22	0.64537	20.5617	NA	19.1899	18.768	20.5358	20.2611	20.1522	NA	19.7738	19.7161	20.2829	19.7666	20.316	20.1865	20.4872	NA	20.0894	19.814	20.8282	20.2293	20.9803	20.856	20.5713	20.3144	NA	20.0795	20.3894	19.9986	19.929	19.6269	20.4806	20.2527	20.442	20.0466	19.4974	19.5429	20.5587	19.8667	NA	20.405
CO3_HUMAN	TIYTPGSTVLYR	22.42	-0.163	-1.3	0.20162	1.68	0.20162	21.9072	21.9159	22.1702	22.2625	22.075	22.1796	22.1186	22.2296	22.4	22.3017	22.6117	22.5239	22.5771	22.7226	22.1908	22.2345	22.5724	22.6804	22.6013	22.57	22.7985	22.9387	22.5284	22.819	22.0567	22.1022	22.9912	22.8536	22.2501	22.2801	22.7407	22.7065	22.4255	22.4914	22.2498	22.2476	22.6108	22.5452	22.2622	22.2007
CO3_HUMAN	KQELSEAEQATR	20.38	0.007	0.04	0.97143	0	0.97143	19.3819	19.4939	19.7887	19.7415	20.5695	20.4119	20.8794	20.8421	20.3507	20.0694	20.3833	20.699	20.4544	20.5954	20.3459	20.0639	20.9056	20.9529	20.7449	20.7203	20.4133	20.6682	20.9978	21.0335	19.8492	19.9185	21.0678	21.0688	20.0279	19.9248	20.7904	20.9285	20.103	20.1842	19.8827	20.1985	20.7162	20.0951	NA	19.6357
CO3_HUMAN	SSLSVPYVIVPLK	22.68	-0.256	-0.18	0.8558	0.03	0.8558	22.687	22.6552	22.5977	14.7715	22.904	22.9356	22.7724	23.0087	22.7523	22.7793	23.2763	23.3435	23.1302	23.1186	22.7816	22.882	23.1773	23.3129	23.08	23.0792	23.5322	23.7095	23.2119	23.295	22.9755	22.996	23.5095	23.6371	23.0211	23.0067	23.3697	23.3688	23.0358	23.0141	23.0014	22.8952	15.5603	23.118	23.0624	22.852
CO3_HUMAN	VSHSEDDCLAFK	21.89	-0.145	-0.68	0.49822	0.47	0.49822	20.7953	21.8424	21.9651	22.1324	21.6109	21.5308	21.8422	21.3687	21.6347	21.7486	21.9581	21.8711	21.7985	21.8906	21.6103	21.5159	22.3264	22.2698	22.229	22.3765	22.2291	22.2812	22.1148	21.7207	21.3902	21.6806	22.3704	22.4832	21.9554	21.8997	21.8896	22.1425	21.8684	21.8745	21.7549	21.7783	22.0702	21.8954	21.6259	22.1871
CO3_HUMAN	IPIEDGSGEVVLSR	20.76	-0.109	-0.21	0.83834	0.04	0.83834	19.1194	21.0772	20.1972	20.3829	19.7134	21.3238	20.3813	19.9411	20.9043	20.9128	21.6158	21.5507	21.0834	20.9653	20.4348	20.2265	21.813	22.1483	20.1525	20.2541	21.4577	21.6751	19.518	19.5607	19.978	19.3601	21.7882	21.7598	21.0056	20.8818	21.7408	21.6576	21.0773	20.7237	21.0372	20.9943	21.3374	21.0012	18.5532	21.2712
CO3_HUMAN	AAVYHHFISDGVR	22.11	-0.207	-0.94	0.353	0.88	0.353	21.7101	21.1387	21.9837	21.8167	21.8741	21.7831	22.3937	21.4828	21.8507	21.9177	22.4768	22.4338	22.3524	22.3106	21.9684	21.81	22.2933	22.0188	22.4693	22.0805	22.733	22.4224	22.3929	21.7794	22.0969	21.9741	22.6055	22.1642	22.216	22.1299	22.4484	22.5092	22.0144	21.9516	22.4051	22.3713	22.1436	22.3419	22.0094	21.5897
CO3_HUMAN	GQGTLSVVTMYHAK	21.63	-0.195	-1.04	0.30321	1.09	0.30321	21.0368	20.9895	21.2814	21.7323	20.9758	21.0682	21.786	21.7062	21.4599	21.3392	22.2905	21.9488	21.8433	21.7443	21.5131	21.3155	21.5965	21.4596	21.9122	21.7467	21.9748	21.9904	21.9017	21.9698	21.2671	21.2384	22.9218	22.7048	21.7988	21.711	22.1461	22.07	21.5312	21.4035	21.4933	21.0106	21.6288	21.3798	21.3518	21.1598
CO3_HUMAN	LVAYYTLIGASGQR	20.81	-0.238	-1.14	0.26157	1.3	0.26157	20.3324	20.1951	19.9633	19.8238	21.0018	20.8932	20.9698	20.7668	20.4217	20.353	21.278	20.8886	21.13	20.7611	20.8025	20.5382	21.0055	20.9675	21.2078	20.6097	21.5623	21.5248	21.4155	21.2586	20.8534	20.6517	21.4048	21.0447	20.5208	20.3431	21.5467	21.3271	20.9282	20.6225	20.5034	20.4657	20.7613	20.7038	20.9266	20.3069
CO3_HUMAN	AAVYHHFISDGVRK	20.32	0.288	0.4	0.69382	0.16	0.69382	18.9216	21.0803	19.3891	20.8576	20.2007	21.0956	21.3145	21.0411	21.3232	21.8849	19.7846	20.9345	19.8841	21.5931	20.7948	20.0973	19.7624	21.071	18.52	19.7424	18.8365	19.6389	19.4882	20.131	19.4637	20.7954	18.041	20.4475	19.6987	20.5525	19.8612	21.2452	19.6784	20.9477	20.7158	21.6397	21.7584	20.9118	19.2999	20.3765
CO3_HUMAN	FYHPEKEDGKLNK	17.57	-0.059	-0.23	0.81825	0.05	0.81825	NA	NA	17.1293	17.2539	17.106	16.4949	18.3875	18.1092	17.0948	17.0568	17.8257	18.026	17.4844	17.6884	17.2402	17.3075	17.8557	17.412	17.9858	17.5922	17.901	18.0782	18.2337	18.2253	16.8565	16.6024	18.9294	18.8174	17.2818	17.1894	18.1145	18.013	17.1015	NA	17.1901	17.4314	NA	17.5095	16.4573	NA
CO3_HUMAN	RIPIEDGSGEVVLSR	21.21	-0.215	-1.59	0.12018	2.52	0.12018	20.7671	20.7513	20.7318	20.67	20.9869	21.0501	21.3722	21.3498	20.7349	20.7912	21.5228	21.4012	21.1927	21.2916	20.9183	20.8943	21.3684	21.3549	21.392	21.4313	21.759	21.8064	21.3647	21.5105	20.9077	20.9871	21.9152	21.5551	20.9819	20.8758	21.665	21.6933	21.163	21.02	21.1277	21.1457	21.438	21.3731	20.9569	21.026
CO3_HUMAN	TVMVNIENPEGIPVK	21.51	-0.289	-2.07	0.04506	4.27	0.04506	20.9359	20.8276	21.6164	21.4898	20.6981	20.7136	21.3093	21.1834	21.3145	21.2674	21.885	21.822	21.5871	21.6373	21.2981	21.2316	21.4211	21.3212	21.9461	21.8685	22.0473	22.0969	21.7146	21.628	21.1426	21.0141	22.3067	22.1159	21.5535	21.4905	21.6745	21.7241	21.6255	21.5986	21.5004	21.4849	21.83	21.6199	21.5528	21.4412
CO3_HUMAN	AGDFLEANYMNLQR	21.64	-0.297	-1.94	0.05897	3.77	0.05897	20.9695	21.0208	21.417	21.5212	21.1908	21.0158	21.2664	21.4144	21.4809	21.296	21.836	21.9766	21.8849	21.8169	21.4341	21.5472	21.5126	21.4412	21.8028	21.8986	22.0495	22.1983	21.845	21.9868	21.389	21.3591	22.3349	22.4696	21.681	21.6509	22.1693	21.8658	21.7031	21.8047	21.6345	21.7601	21.2656	21.7487	21.409	21.3642
CO3_HUMAN	VYAYYNLEESCTR	20.94	-0.102	-0.64	0.52569	0.41	0.52569	20.3889	20.4167	20.7064	20.4608	20.5322	20.5982	21.0087	20.8994	20.6704	20.8074	21.2634	21.2064	20.9798	21.1957	20.8933	20.6993	21.076	21.141	21.5108	21.3949	21.3512	21.5256	21.3302	21.5883	20.7422	20.7977	21.5124	21.3634	20.9447	20.6962	21.4668	21.3712	20.7358	20.8013	20.1331	20.2687	20.5795	20.5611	21.0833	21.0388
CO3_HUMAN	SYTVAIAGYALAQMGR	17.61	-0.508	-0.77	0.44497	0.6	0.44497	NA	16.4427	NA	NA	17.5674	17.2743	18.5839	16.3379	NA	16.7547	18.0356	17.3793	17.6935	17.3697	18.9862	17.6441	16.7731	15.6364	18.4365	17.2159	19.0817	17.8267	19.423	17.607	17.8966	16.8054	18.391	17.4264	17.2874	16.9762	17.732	17.6147	18.4019	17.6167	NA	NA	17.6366	NA	18.0895	17.2035
CO3_HUMAN	VFLDCCNYITELR	23.03	-0.279	-2	0.0519	4.01	0.0519	22.7514	22.5562	22.8164	22.8729	22.6327	22.5355	22.914	23.0511	22.8427	22.8944	23.595	23.5596	23.1911	23.1964	22.7294	22.8859	22.5239	22.4974	22.948	22.8474	23.468	23.6185	23.0937	23.0697	22.9532	22.9426	23.6705	23.8203	23.1322	23.1581	23.4587	23.5531	22.9925	22.9892	22.8079	23.0247	22.8717	23.1454	22.7133	22.9412
CO3_HUMAN	SGIPIVTSPYQIHFTK	23.01	-0.199	-1.44	0.15852	2.06	0.15852	22.7745	22.6349	22.6834	22.5511	22.672	22.6412	22.9723	23.1891	22.7428	22.6445	23.4692	23.2918	23.2512	23.1569	22.6254	22.8177	22.8198	22.8973	23.1839	23.0912	23.513	23.5561	23.1084	23.1732	22.8315	22.8253	23.5659	23.5921	22.9624	22.9318	23.5074	23.2949	22.9361	22.9464	23.058	22.8909	22.9182	23.1777	22.785	22.5227
CO3_HUMAN	DICEEQVNSLPGSITK	20.8	-0.247	-1.48	0.14721	2.18	0.14721	20.2114	20.4285	19.9905	20.1584	20.6023	20.8822	20.5671	20.6771	20.5734	20.5536	20.6068	20.5485	20.3927	20.5791	20.4086	20.4423	21.5703	21.7744	21.2493	21.3957	21.4036	21.6435	21.1391	21.299	20.4486	20.6475	21.0108	21.1884	20.5529	20.6841	21.1252	21.2526	20.8629	21.0073	20.6877	20.8507	20.7725	20.7166	20.5842	20.6775
CO3_HUMAN	VELLHNPAFCSLATTK	21.55	-0.154	-1.19	0.24268	1.41	0.24268	20.9573	21.1304	21.3597	21.4039	21.1477	21.2775	21.3932	21.6099	21.4773	21.4188	21.8464	21.7676	21.6653	21.64	21.253	21.3051	21.5678	21.6831	21.6391	21.8882	22.0066	22.0999	21.4788	21.7655	21.1159	21.1969	22.0292	21.9902	21.5026	21.4822	21.7448	21.8364	21.486	21.634	21.644	21.5429	21.6971	21.6509	21.2602	21.353
CO3_HUMAN	SNLDEDIIAEENIVSR	22.13	-0.104	-0.7	0.48784	0.49	0.48784	21.8883	22.07	21.3446	21.4825	22.3291	22.2862	22.076	22.3102	21.6755	21.9561	22.3357	22.3235	22.1362	22.235	21.8811	21.9435	22.3769	22.3154	22.2062	22.356	22.6667	22.7467	22.3179	22.5064	22.0233	22.159	22.2676	22.416	21.9761	22.0126	22.0352	22.5193	22.12	22.1293	21.8385	21.8221	22.0165	21.8839	21.9471	22.2094
CO3_HUMAN	KVFLDCCNYITELR	22.14	-0.283	-1.84	0.07238	3.4	0.07238	21.4673	21.4262	22.1317	22.1312	21.7204	21.4772	22.1037	22.3537	22.0953	21.9594	22.7316	22.4475	22.2866	22.39	21.8732	22.0041	21.715	21.6512	22.0633	21.9557	22.4777	22.606	22.3026	22.3283	21.7366	21.8665	23.0367	22.9552	22.28	22.3272	22.6676	22.7362	22.0341	22.075	22.262	22.1746	22.248	22.1014	21.7987	21.6268
CO3_HUMAN	VHQYFNVELIQPGAVK	23.13	-0.235	-1.58	0.12116	2.51	0.12116	22.5346	22.4087	23.2442	23.3323	22.5491	22.3988	23.0443	23.1834	23.0705	22.943	23.4827	23.3155	23.1796	23.1203	22.8572	22.9201	23.1048	22.8056	23.4595	23.3852	23.487	23.4824	23.2697	23.3345	22.6802	22.5877	24.1483	23.8774	23.2596	23.1665	23.5559	23.3991	23.2498	23.2234	23.1568	23.073	23.0478	23.166	22.9687	22.9066
CO3_HUMAN	SEETKENEGFTVTAEGK	20.15	0.021	0.1	0.92278	0.01	0.92278	19.3607	19.8633	19.7562	19.605	20.2042	20.1912	20.7724	20.7629	19.5106	19.6673	20.4454	20.4209	20.0427	20.456	19.8816	19.7675	20.8294	20.7792	20.3575	20.4491	20.1836	20.3199	20.8238	20.6924	19.7288	19.8389	21.3424	21.1918	19.703	19.5693	20.4509	20.6719	19.5633	19.7558	19.6417	19.7538	20.42	19.7177	19.6962	19.6345
CO3_HUMAN	TELRPGETLNVNFLLR	22.46	-0.526	-1.43	0.15921	2.06	0.15921	22.031	20.7817	22.7617	22.5182	21.8231	21.6579	22.3467	22.2346	22.5053	22.7234	23.5521	23.3579	23.0213	22.7759	22.2919	22.5736	20.5574	19.2654	22.763	22.3234	22.988	22.5295	22.5073	22.2106	22.1652	21.5391	23.757	23.8131	22.9873	22.8966	23.1591	23.071	23.0074	22.8341	22.9991	22.8843	22.9169	22.8375	21.744	21.5379
CO3_HUMAN	EYVLPSFEVIVEPTEK	20.96	-0.314	-1.62	0.11299	2.62	0.11299	20.2779	20.2045	21.2072	21.0534	20.1362	19.9496	20.7107	20.564	20.8766	20.8587	21.5035	21.4922	21.315	21.0986	20.9486	20.8946	20.3931	19.7649	21.4469	21.2688	21.2413	21.1001	21.135	20.907	20.2961	20.2482	21.8329	21.8345	21.0198	20.9651	21.4275	21.2251	21.4564	21.3262	20.7886	20.6908	21.2037	21.3978	20.977	21.1636
CO3_HUMAN	LSINTHPSQKPLSITVR	22.38	-0.192	-1.29	0.20518	1.66	0.20518	22.0764	21.83	21.7195	22.1154	22.0056	22.1766	22.722	22.6949	22.1531	22.2018	22.6989	22.667	22.3639	22.4755	22.0895	21.9249	22.3194	22.4869	22.4299	22.486	22.752	22.9196	22.539	22.617	22.1265	22.1611	23.2046	23.1765	22.3145	22.2649	22.8093	22.7762	22.2928	22.2651	22.4225	22.2413	22.4373	22.2517	21.9587	21.9375
CO3_HUMAN	SGQSEDRQPVPGQQMTLK	21.02	-0.103	-0.55	0.58733	0.3	0.58733	20.0144	20.2509	20.769	21.044	20.7505	20.7742	21.3878	20.9917	20.8904	20.9443	21.2965	21.2178	21.1074	21.2073	20.8388	20.6204	21.3696	21.2874	21.2856	21.4082	21.3812	21.4115	21.4471	20.7209	20.6508	20.7776	21.653	21.8742	20.9175	20.9949	21.2132	21.5237	20.8219	20.9266	21.0591	21.0691	21.2125	20.9472	20.5217	20.3971
CO3_HUMAN	KVEGTAFVIFGIQDGEQR	17.9	-0.207	-0.43	0.66613	0.19	0.66613	18.1014	17.5112	16.7981	15.541	18.1865	17.8434	18.8811	17.6717	17.2975	17.531	18.1986	17.6602	18.5103	18.0061	18.6431	17.6052	17.9776	17.0849	19.0117	17.8469	18.8659	18.5075	19.1033	18.0639	17.8314	17.341	18.4292	17.6173	17.6343	17.1899	18.4346	18.1697	18.6969	17.9867	17.0321	16.7184	18.5167	17.3651	18.7	17.848
CO3_HUMAN	VRVELLHNPAFCSLATTK	21.26	-0.334	-2.19	0.03462	4.78	0.03462	20.6332	20.5641	21.066	20.8359	20.8631	20.7959	21.231	21.4477	20.9962	20.8435	21.6483	21.479	21.3219	21.2999	20.7789	20.8988	21.1122	21.0214	21.4778	21.5137	21.7983	21.8696	21.4607	21.5938	20.8536	20.7643	22.3245	22.0369	21.3015	21.2433	21.7377	21.6337	21.2389	21.2452	21.3895	21.2334	21.5123	21.3985	20.8479	21.0314
CO3_HUMAN	DAPDHQELNLDVSLQLPSR	19.58	-0.571	-0.91	0.37126	0.82	0.37126	NA	18.0866	19.6443	17.9776	NA	17.6231	NA	19.2975	19.9099	19.8875	20.6861	19.5114	20.4318	19.9502	NA	19.0596	17.1812	NA	21.2218	19.9575	19.3908	19.0527	21.057	20.0534	NA	18.1203	21.3391	19.7245	20.3324	18.8486	20.5294	20.2089	20.6172	19.3324	19.2025	19.0689	NA	18.327	20.9128	NA
CO3_HUMAN	ILLQGTPVAQMTEDAVDAER	23.88	-0.302	-1.68	0.10151	2.81	0.10151	23.0582	23.4558	23.7699	23.9841	23.4315	23.4964	23.7007	23.6647	23.566	23.8311	24.4986	24.3653	24.0734	23.9824	23.5246	23.8446	23.5495	23.2893	23.7872	23.746	24.4581	24.0703	24.1525	24.001	23.8779	23.6784	24.5055	24.9175	24.1423	24.2168	23.9319	24.2216	24.024	23.9048	24.0364	23.7877	23.7547	24.0138	23.3816	23.5836
CO3_HUMAN	QCQDLGAFTESMVVFGCPN	17.6	-0.356	-0.53	0.59803	0.28	0.59803	16.926	16.5689	17.3029	17.4437	16.6496	16.0089	18.8059	16.9545	17.2135	17.4295	19.147	18.4506	18.2998	17.5491	18.462	17.141	17.4738	NA	16.1263	16.9321	18.8571	17.0803	19.2641	16.5025	17.0635	16.4516	19.0879	18.3454	17.5433	17.0534	18.2919	18.3046	19.2801	18.0667	17.672	16.5438	18.322	16.5791	17.7558	17.3976
CO3_HUMAN	AYYENSPQQVFSTEFEVK	21.56	-0.233	-1.44	0.15804	2.07	0.15804	21.0008	20.9732	21.2557	21.1863	21.2155	21.1453	21.4644	21.6716	21.2475	21.3196	21.8633	21.8413	21.8816	21.7928	21.3415	21.5738	21.4646	20.9558	21.8766	21.8869	21.8346	22.0778	21.8406	21.6035	21.052	21.1565	22.0098	22.3902	21.6375	21.6785	21.7706	21.9224	21.8789	21.8898	21.0781	21.1914	21.5411	21.5225	21.7123	21.8304
CO3_HUMAN	VPVAVQGEDTVQSLTQGDGVAK	23.59	-0.17	-1.29	0.20304	1.67	0.20304	23.0292	23.2251	23.4117	23.4264	23.1903	23.3708	23.6027	23.7213	23.3931	23.4311	24.0633	23.6881	23.6571	23.7565	23.1581	23.292	23.6184	23.6538	23.6389	23.7455	23.8836	23.9151	23.6238	23.8241	23.2979	23.3042	24.2769	24.1832	23.5949	23.5308	23.9741	23.9199	23.4363	23.462	23.6604	23.6871	23.6631	23.5033	23.3539	23.3868
CO3_HUMAN	EDIPPADLSDQVPDTESETR	23.35	0.236	1.61	0.1147	2.6	0.1147	23.3757	23.6722	23.0076	23.5589	23.6324	23.8	23.5916	23.7725	23.4881	23.4306	23.2058	23.2754	23.281	23.5642	23.3385	23.4057	23.4628	23.5679	23.3546	23.5302	23.2009	23.3152	23.4719	23.5721	23.3406	23.4477	22.9514	23.1936	23.2233	23.3239	22.8602	22.9561	23.0978	23.3946	23.0372	23.1159	23.2713	23.3445	23.1014	23.3777
CO3_HUMAN	VQLSNDFDEYIMAIEQTIK	22.56	-0.684	-1.26	0.21334	1.6	0.21334	21.7957	21.7837	23.5417	23.3508	21.2885	20.688	22.7307	22.9039	22.6845	22.441	23.7339	23.5695	23.0368	23.015	22.813	23.0113	19.8391	16.7916	22.8281	22.5571	22.7507	22.5491	22.6679	22.7234	21.9509	21.5861	24.1599	24.3851	23.0885	23.2686	23.1249	23.3158	22.8681	22.6259	22.4141	22.4131	22.7986	23.27	23.1213	23.0117
CO3_HUMAN	SLYVSATVILHSGSDMVQAER	17.98	-0.37	-0.46	0.647	0.21	0.647	18.3064	17.4476	17.7974	16.7529	18.2055	17.6669	19.1122	16.6988	17.4905	17.326	18.577	17.8881	18.6925	17.6336	19.3525	16.9769	17.4931	15.55	19.3	17.5757	19.346	18.4331	19.7941	17.5267	18.1889	17.2052	19.2947	18.2218	18.6701	17.599	19.3067	18.1722	18.6291	17.039	17.086	16.8502	17.5504	17.2346	19.5897	17.5007
CO3_HUMAN	SEFPESWLWNVEDLKEPPK	20.43	-0.568	-2.09	0.04297	4.36	0.04297	19.8873	19.779	20.55	20.3911	19.4885	19.2604	20.3671	20.2628	20.2663	20.2222	21.1495	21.1331	20.802	20.5841	20.4468	20.384	18.877	17.7207	20.8438	20.5581	21.0813	20.838	20.6264	20.4776	20.0975	19.7585	21.5111	21.5007	20.6323	20.4172	21.3257	21.1033	20.8089	20.5208	20.6469	20.5233	20.719	20.9567	20.3685	20.4245
CO3_HUMAN	SSLSVPYVIVPLKTGLQEVEVK	18.37	-0.281	-0.68	0.50025	0.46	0.50025	19.0427	18.9703	18.9002	18.9599	19.3091	19.5234	19.4604	19.5082	19.416	19.3352	17.9764	17.8368	17.6567	17.5862	17.183	17.076	16.0534	15.8139	17.106	17.1515	18.9475	19.3131	20.2021	20.1455	19.231	19.1753	20.3168	20.4073	19.4078	19.506	18.5086	18.3311	17.5209	17.3503	16.9477	17.0773	NA	16.6684	16.5896	16.893
CO3_HUMAN	DYAGVFSDAGLTFTSSSGQQTAQR	17.82	0.167	0.41	0.68102	0.17	0.68102	18.3205	17.5647	15.9894	NA	18.4303	18.295	17.8396	17.9671	17.4717	17.8879	18.6724	17.9252	18.5312	18.3174	17.7209	17.5117	19.0049	17.4561	18.233	17.8914	17.6493	18.4371	18.0872	17.8401	16.7952	17.0822	18.7535	17.4063	17.6267	17.5082	18.7226	18.6957	18.5094	18.0241	17.3406	16.8142	17.2653	17.2708	16.6929	17.4336
CO3_HUMAN	QKPDGVFQEDAPVIHQEMIGGLR	21.44	-0.274	-1.69	0.09769	2.87	0.09769	20.9874	20.8286	21.4956	21.5512	20.8427	20.8287	21.339	21.4384	21.1917	21.0314	21.7468	21.301	21.415	21.2689	21.2458	21.1298	21.4114	21.1394	22.001	21.9231	22.0045	21.9859	21.7042	21.8355	21.1218	20.9577	22.087	22.2067	21.548	21.3168	21.8032	21.7864	21.529	21.4831	21.631	21.3368	21.287	21.4335	21.4203	21.116
CO3_HUMAN	TMQALPYSTVGNSNNYLHLSVLR	22.24	-0.323	-1.68	0.10096	2.82	0.10096	22.1209	21.6293	22.1588	22.4247	21.4444	21.4579	22.1697	22.2907	21.9983	22.0433	22.8776	22.7781	22.5755	22.2869	22.1388	22.2739	21.3863	20.9626	22.3286	22.2577	22.7741	22.6616	22.3831	22.1482	22.0358	21.8467	23.0286	23.2004	22.4777	22.4425	22.627	22.5064	22.3419	22.3303	22.2389	22.0182	22.1859	22.4716	22.3776	21.9691
CO3_HUMAN	DTWVEHWPEEDECQDEENQK	21.73	-0.148	-0.9	0.37484	0.81	0.37484	21.2817	21.1029	21.5674	21.6431	21.1395	20.9537	21.978	22.0742	21.4641	21.4387	22.3805	22.4124	21.9794	21.9457	21.6119	21.7136	21.4661	21.2156	21.8277	21.9329	21.996	21.989	22.0139	21.9999	21.3264	21.1225	22.827	22.7535	21.5517	21.6286	22.3707	22.3278	21.5029	21.5032	21.4215	21.5146	21.633	21.7538	21.4306	21.4251
CO3_HUMAN	YYGGGYGSTQATFMVFQALAQYQK	20.09	-0.737	-2.05	0.04708	4.19	0.04708	18.9452	18.9325	20.6833	20.5687	18.8116	19.1767	19.3995	19.8484	19.7649	19.8501	21.0709	20.9468	20.6801	20.2092	19.8917	20.2568	18.5383	17.1656	19.5983	20.0549	20.6047	20.203	20.5759	20.2794	19.5575	19.1749	21.7163	21.8019	20.5945	20.8194	21.1162	20.5322	20.3682	20.2864	20.3036	20.2795	20.1041	20.8136	19.6702	20.3394
CO3_HUMAN	YFKPGMPFDLMVFVTNPDGSPAYR	21.34	-1.234	-1.93	0.06057	3.73	0.06057	20.4899	19.7632	22.6676	22.4002	19.5912	18.754	20.6558	20.9853	21.5644	21.4184	22.7624	22.625	22.2194	21.6919	21.5675	22.0784	13.2901	NA	21.0851	21.0272	21.6414	21.2902	21.6039	21.4698	20.6946	20.1826	23.3062	23.5827	22.2729	22.19	22.3483	22.1729	21.4371	21.3468	21.9296	21.6223	21.6955	22.4662	21.1179	21.3035
CO3_HUMAN	EGVQKEDIPPADLSDQVPDTESETR	18.34	-0.237	-0.89	0.37967	0.79	0.37967	17.167	17.4037	17.2303	17.5184	17.9469	18.062	19.0663	19.2737	17.6001	17.7266	18.9673	19.1093	18.5952	18.879	17.784	17.8507	18.9971	19.1257	17.8178	18.3163	18.489	18.787	18.9093	19.2185	18.041	18.2417	19.7213	19.7087	17.9413	17.9347	19.2024	19.2716	17.9009	18.192	18.4605	18.6653	17.9985	18.0183	16.96	17.5104
CO3_HUMAN	QVREPGQDLVVLPLSITTDFIPSFR	20.08	-0.308	-0.89	0.37642	0.8	0.37642	18.7919	18.5355	21.1302	20.6668	18.4113	18.0248	19.5117	19.8374	20.3304	20.1311	21.2648	21.0357	21.0114	20.5547	19.9781	20.2306	NA	NA	19.3196	19.8051	20.0058	19.6393	19.9153	20.2033	19.0358	18.7775	21.9696	22.2655	20.9402	20.8393	20.9889	20.8268	19.7624	19.6041	19.9432	19.6996	20.0552	20.4401	19.7503	19.905
CO3_HUMAN	HYLMWGLSSDFWGEKPNLSYIIGK	17.76	0.14	0.17	0.86795	0.03	0.86795	NA	NA	20.2171	19.3808	NA	NA	16.7496	15.3589	17.8224	16.9545	19.5199	19.0645	18.3448	16.9329	18.7131	18.8767	NA	NA	15.8107	15.0423	17.6764	15.2986	18.0293	17.1304	14.9909	NA	20.9082	21.0718	18.9116	18.3729	19.0198	18.6067	16.0894	15.6097	18.173	16.8067	18.4979	19.3607	16.7297	15.9495
CO3_HUMAN	KHYLMWGLSSDFWGEKPNLSYIIGK	19.04	-0.533	-0.88	0.38686	0.78	0.38686	NA	NA	19.9796	19.0243	NA	NA	17.6004	17.0614	NA	NA	20.1185	19.6127	19.3001	NA	18.8674	19.0861	NA	NA	NA	16.6624	NA	NA	19.0258	18.2072	NA	NA	20.8581	20.7923	19.2825	18.9907	20.107	19.4471	NA	NA	19.4456	18.6957	19.0443	19.6582	17.1625	NA
CO3_HUMAN	YRGDQDATMSILDISMMTGFAPDTDDLK	17.24	-0.771	-0.94	0.35242	0.89	0.35242	16.8585	15.6932	18.9804	17.8924	14.8812	14.4049	17.8495	15.5549	16.7287	16.2059	18.2407	16.9308	17.5837	16.7081	18.1012	16.3439	14.8909	NA	19.3343	17.6405	18.2265	16.8897	19.0413	16.6979	16.4998	15.2127	19.599	18.5665	17.6443	17.144	18.0062	17.0537	18.8961	17.2219	16.8764	16.2298	18.3753	16.6729	18.8528	17.7034
CO3_HUMAN	LESEETMVLEAHDAQGDVPVTVTVHDFPGK	21.19	-0.314	-0.91	0.37062	0.82	0.37062	20.7014	20.6691	20.8393	20.1491	21.0089	20.6357	21.5118	20.8476	20.9572	20.6503	21.6819	21.2227	21.5975	21.0892	21.451	20.6965	21.1795	20.3576	22.0407	21.302	21.9901	21.7522	22.0936	21.2922	21.2884	20.9511	22.0192	21.4205	21.0568	20.8814	21.9214	21.351	21.475	20.8983	20.9673	20.7944	21.5771	20.7775	21.632	20.7308
CO3_HUMAN	QDSLSSQNQLGVLPLSWDIPELVNMGQWK	15.83	-1.402	-1.63	0.16513	2.65	0.16513	NA	NA	NA	NA	NA	NA	NA	NA	NA	NA	NA	NA	14.0759	NA	NA	NA	NA	NA	NA	16.1839	NA	NA	NA	NA	NA	NA	NA	16.8534	NA	NA	NA	NA	NA	NA	NA	NA	NA	NA	NA	16.21
CO3_HUMAN	HLIVTPSGCGEQNMIGMTPTVIAVHYLDETEQWEK	20.78	-0.607	-1.3	0.20247	1.68	0.20247	20.9612	20.0473	22.4149	22.2602	18.3917	17.6999	21.0742	21.0891	20.109	19.878	22.1154	22.0955	21.6789	21.1833	21.4615	21.2988	16.7631	NA	20.1378	19.7949	21.1438	20.6557	21.0032	20.7996	20.4966	20.0403	22.6566	22.6163	21.856	21.6728	21.485	21.3246	19.6617	19.3507	20.6313	20.2982	20.4949	20.6825	21.6288	21.3866
CO3_HUMAN	NNNEKDMALTAFVLISLQEAKDICEEQVNSLPGSITK	17.06	-0.437	-1.16	0.25654	1.34	0.25654	NA	NA	17.4649	17.3387	NA	NA	NA	NA	15.2985	15.4875	17.1965	17.7064	16.3785	16.6921	17.1854	16.7818	NA	NA	NA	NA	17.921	17.5653	17.3952	17.6858	NA	NA	17.1967	17.1666	17.3645	17.5818	18.1647	18.0331	15.9544	NA	17.2087	16.831	NA	17.3913	16.56	15.8978
CO3A1_HUMAN	INTDEIMTSLK	17.2	0.633	1.45	0.18967	2.11	0.18967	NA	NA	NA	NA	NA	NA	NA	NA	NA	NA	17.2196	NA	NA	NA	NA	NA	18.0166	NA	NA	NA	16.7641	NA	NA	17.1504	NA	NA	NA	NA	NA	NA	NA	17.2421	NA	NA	NA	NA	16.784	NA	NA	NA
CO3A1_HUMAN	FTYTVLEDGCTK	16.29	0.378	0.71	0.49944	0.51	0.49944	15.7179	NA	NA	NA	NA	NA	NA	NA	NA	NA	16.1938	NA	NA	NA	NA	NA	NA	17.1511	16.5852	NA	NA	NA	NA	15.6821	NA	NA	NA	NA	NA	NA	NA	16.3861	NA	NA	NA	NA	NA	NA	NA	NA
CO4A_HUMAN	NNVPCSPK	15.95	-0.253	-0.52	0.60911	0.27	0.60911	14.1152	13.4039	16.6293	15.9688	16.8192	16.1986	15.6199	14.8258	15.5416	15.3304	16.3678	17.0497	14.7854	14.8044	17.4451	16.8544	16.4196	16.9842	16.0692	15.3073	15.1301	16.1269	17.2559	16.8696	NA	NA	17.5939	16.8201	15.9709	16.1211	16.9635	16.7486	15.7136	15.2813	15.6893	15.6227	16.8261	15.3494	15.1749	14.1761
CO4A_HUMAN	LELSVDGAK	21.76	-0.112	-0.59	0.55754	0.35	0.55754	21.5033	21.815	21.4376	21.3433	21.9088	21.9582	NA	20.9788	NA	21.3799	21.6181	21.6533	20.8512	21.1234	22.4966	22.2441	22.0761	22.2399	22.0009	22.0783	22.0211	22.0511	22.4235	22.2093	NA	21.0232	21.3627	21.6234	21.6232	21.7527	21.6853	22.1242	21.7066	21.8313	21.4373	21.5698	21.8185	21.5284	22.3126	22.2158
CO4A_HUMAN	GQIVFMNR	21.08	-0.102	-0.59	0.5577	0.35	0.5577	20.9509	20.875	21.4361	21.3308	20.8531	20.8729	20.6051	20.3934	20.9034	20.7893	21.2318	21.1841	20.5477	20.4857	21.7365	21.7107	21.2056	21.215	21.1133	21.0673	21.3971	21.5268	21.6588	21.7047	20.1242	20.0661	21.713	21.5035	21.2868	21.0001	21.4941	21.4566	21.0004	20.8376	20.7426	20.3706	20.9178	20.9222	21.4881	21.3381
CO4A_HUMAN	VEYGFQVK	22.02	-0.09	-0.62	0.53911	0.38	0.53911	22.0867	21.7932	21.9363	22.0263	22.1939	22.1139	21.5881	21.6105	21.7575	21.7276	22.1734	22.1714	21.6185	21.4438	22.541	22.4853	22.1714	22.2315	21.8787	21.8771	22.3035	22.3484	22.5979	22.5956	21.2115	21.1423	22.2767	22.2175	22.2126	22.1844	22.4879	22.3531	21.8756	21.756	21.5295	21.6703	21.8714	21.8623	22.3746	22.3588
CO4A_HUMAN	FACYYPR	21.13	-0.124	-0.73	0.47054	0.53	0.47054	20.8848	20.7181	21.4153	21.1703	21.2829	21.1231	20.7459	20.4564	20.7906	20.8586	21.4191	21.4033	20.8496	20.6845	21.8291	21.8576	21.1119	20.8432	21.0611	20.8562	21.5209	21.277	21.7003	21.2573	20.3994	20.2572	21.5259	21.3796	21.4751	21.41	21.4737	21.5094	20.9661	20.9151	20.9505	20.9265	21.0527	21.1227	21.4888	21.2314
CO4A_HUMAN	QGSFQGGFR	19.92	-0.094	-0.34	0.7388	0.11	0.7388	19.6728	19.4353	18.7022	17.7457	20.6992	20.7344	19.7836	19.6316	19.2893	19.33	19.988	19.9931	19.5525	19.5742	20.4576	20.7846	20.7857	20.7363	20.2046	20.2746	20.4395	20.5015	20.903	20.6762	19.764	19.0411	19.8008	20.1508	19.8303	19.4571	20.4745	20.7911	19.6512	19.4124	19.2308	19.2575	19.6224	19.5624	20.3972	20.2919
CO4A_HUMAN	TYNVLDMK	21.43	-0.036	-0.23	0.81734	0.05	0.81734	21.454	21.4944	21.6177	21.6594	21.3465	21.328	21.0487	21.0824	21.1817	21.1619	21.6937	21.7275	20.7848	20.9564	21.9463	21.8793	21.4554	21.536	21.3944	21.5027	21.7229	21.8312	21.8342	21.9105	20.6291	20.6882	22.2744	21.9927	21.4004	21.3197	21.783	21.7786	21.0798	21.0562	20.7986	20.8771	21.1088	21.0635	21.8875	21.9383
CO4A_HUMAN	FGLLDEDGK	19.78	-0.186	-0.81	0.42338	0.65	0.42338	19.9073	20.0944	18.7212	18.8971	20.2793	20.3397	18.9376	19.1146	19.3342	19.1563	19.5058	19.6423	18.6505	19.012	20.442	20.4141	20.3695	20.7555	19.9723	20.2361	20.4	20.619	20.3945	20.5863	18.925	19.1548	19.5851	19.3048	19.3834	19.4661	20.0274	20.1524	19.5953	19.842	19.673	19.665	19.9384	19.5549	20.5408	20.7023
CO4A_HUMAN	SHKPLNMGK	16.51	-0.312	-1.02	0.31504	1.04	0.31504	15.8482	16.0057	16.9613	NA	15.9543	15.3032	16.7657	16.4417	15.5124	NA	16.6784	17.2259	15.0407	NA	17.1149	17.0242	16.584	16.3137	17.046	16.656	16.6745	17.0179	17.2893	16.9314	14.814	14.4352	18.1056	17.6125	16.4831	16.5198	16.9747	17.1838	16.1394	16.3347	16.6461	16.7097	16.5569	16.4609	16.8742	16.6809
CO4A_HUMAN	LGQYASPTAK	20.52	0.063	0.33	0.74161	0.11	0.74161	20.2768	20.2372	20.4369	20.5084	20.9668	20.9786	20.3158	20.1765	20.3832	20.1572	20.4458	20.7235	19.9728	20.2175	21.3385	21.1076	20.8443	21.072	20.3688	20.4931	20.4037	20.7161	21.2621	21.3462	19.4388	19.5442	20.8283	20.9285	20.4896	20.5793	20.6016	20.8973	20.2375	20.2479	20.0587	20.2173	20.6385	20.0688	20.5407	20.7079
CO4A_HUMAN	DHAVDLIQK	20.99	-0.063	-0.35	0.72949	0.12	0.72949	20.6161	20.8414	20.6549	20.7261	21.4406	21.4514	20.7882	20.5675	20.2852	20.5316	20.9406	20.9213	20.2404	20.5458	21.7259	21.4673	21.5981	21.363	21.1811	21.2101	21.2963	21.325	21.6408	21.4416	20.2295	20.3736	20.9311	21.1733	20.8752	20.9126	21.0834	21.3832	20.8313	20.8219	20.7879	20.8634	21.0191	20.6266	21.534	21.2167
CO4A_HUMAN	AEFQDALEK	21.62	-0.108	-0.53	0.60168	0.28	0.60168	21.1123	21.5354	20.7598	20.9496	21.9187	22.0169	21.1759	20.9153	21.0906	21.2898	21.6105	21.7049	21.0444	21.0949	22.2344	22.1468	22.2756	22.3256	21.9978	22.2094	22.1227	21.971	22.1335	21.8142	21.0295	21.0286	21.6145	21.0282	21.3102	21.4756	21.7754	22.1613	21.7636	21.8624	21.4628	21.54	21.7346	21.434	22.2399	22.0727
CO4A_HUMAN	GLQDEDGYR	20.6	0.025	0.12	0.90293	0.02	0.90293	20.1544	20.2132	20.475	20.6422	20.9868	20.934	20.3199	20.2685	20.4816	20.3856	20.641	21.0136	19.9213	20.1952	21.4261	21.1564	20.8324	21.0245	20.4828	20.7362	20.5	20.8819	21.439	21.5267	19.4746	19.5929	20.8402	21.2143	20.3151	20.5289	20.9395	21.1225	20.2315	20.4316	20.0944	20.2417	20.7731	20.2741	20.5774	20.7833
CO4A_HUMAN	SHALQLNNR	19.78	0.003	0.01	0.98842	0	0.98842	19.3394	19.5247	19.8488	19.9158	19.9073	19.9206	19.892	19.6929	19.6142	19.4398	19.8883	20.2643	19.1486	19.3702	20.3223	20.35	19.8555	19.732	19.6461	19.765	19.6931	20.002	20.3365	20.4466	18.5562	18.9813	20.5111	20.573	19.7326	19.8267	20.176	20.368	19.352	19.4239	19.3032	19.6036	NA	19.4692	19.6383	19.8754
CO4A_HUMAN	VDFTLSSER	21.6	-0.108	-0.68	0.49984	0.46	0.49984	21.5502	21.5957	21.341	21.5732	21.6618	21.7744	21.2157	21.1046	21.4299	21.3059	21.7153	21.8371	21.025	21.2338	22.1417	22.0763	21.5987	21.7604	21.5075	21.527	21.9034	22.1423	22.0185	22.2304	20.7918	20.9926	21.8647	21.9992	21.7612	21.5813	22.0488	22.0647	21.4132	21.4044	21.2355	20.957	21.422	21.3718	22.0108	21.9148
CO4A_HUMAN	SCGLHQLLR	21.1	-0.153	-0.72	0.47711	0.51	0.47711	20.7898	20.7752	21.4313	21.4382	21.0407	21.0052	20.7594	20.0974	20.7453	21.0202	21.3299	21.2946	20.7241	20.6903	21.6013	21.7172	21.0742	20.7366	21.0957	21.0072	21.624	21.2823	21.5116	20.5737	20.5198	20.5777	21.2705	21.1425	21.4267	21.44	21.2855	21.5587	20.888	21.0494	21.1829	21.2602	21.0656	20.9757	21.6377	21.1698
CO4A_HUMAN	ITQVLHFTK	20.83	-0.115	-0.5	0.62497	0.25	0.62497	20.9591	20.9336	21.1532	NA	20.6971	20.521	NA	20.3934	NA	NA	NA	NA	NA	NA	NA	21.2307	20.6115	20.5291	20.5578	20.3624	NA	21.1837	21.0569	21.0684	NA	19.96	21.255	21.3562	NA	NA	NA	NA	NA	NA	NA	NA	20.504	NA	21.2558	21.0748
CO4A_HUMAN	YVLPNFEVK	21.39	-0.137	-0.81	0.42049	0.66	0.42049	21.4781	21.5974	20.7703	20.8658	21.7522	21.6044	20.8173	21.0158	20.9355	20.7607	21.329	21.0273	20.6773	20.8428	21.9836	21.9856	21.8113	21.9139	21.716	21.4785	21.7748	21.9478	21.8309	21.8877	20.6962	20.7757	21.3471	21.1972	21.2066	21.1424	21.7073	21.6852	21.4748	21.469	21.3379	21.2686	21.1613	21.1287	22.1118	21.9594
CO4A_HUMAN	VGDTLNLNLR	21.8	-0.14	-1	0.32087	1.01	0.32087	21.672	21.6642	21.8949	21.8975	21.6852	21.7832	21.2598	21.3293	21.5477	21.5615	21.9391	21.9669	21.2645	21.3655	22.2805	22.2369	21.7973	22.0084	21.7643	21.7684	22.0894	22.2002	22.1055	22.1539	20.9158	21.088	22.3871	22.3792	21.8796	21.9582	22.1103	22.1858	21.5554	21.6535	21.5599	21.5186	21.7407	21.6275	22.2116	22.1722
CO4A_HUMAN	CSVFYGAPSK	19.29	0.034	0.19	0.85377	0.03	0.85377	18.8617	19.0677	19.4203	19.4021	19.5988	19.6698	18.9362	18.7416	18.9647	19.2126	19.2915	19.2979	18.6636	18.7284	19.8687	19.9288	19.587	19.7275	19.7488	19.3782	19.4797	19.3957	20.0276	19.4498	18.5225	18.931	19.4976	19.4708	19.3104	19.3603	19.5441	19.6665	18.9509	18.9932	18.7911	18.9522	19.2046	18.8371	19.5777	19.4556
CO4A_HUMAN	FGLLDEDGKK	20.59	-0.233	-1.04	0.30722	1.08	0.30722	20.7108	20.769	NA	NA	20.5302	20.5136	NA	19.6393	19.8281	NA	NA	NA	NA	19.7817	20.8013	20.8421	20.8015	20.9139	20.697	20.5536	20.906	21.009	20.6676	20.6961	NA	19.6364	NA	NA	NA	NA	21.0416	20.8058	20.4725	20.5125	NA	NA	NA	20.2995	21.1281	21.1306
CO4A_HUMAN	VDVQAGACEGK	18.85	0.103	0.39	0.69961	0.15	0.69961	17.9696	18.2672	NA	18.7426	19.2771	19.3297	18.3734	18.4707	18.8405	18.4443	18.431	18.8577	17.7823	18.0988	19.9059	19.6761	19.6624	20.0422	19.4564	19.4483	18.6084	19.0677	19.7568	19.8094	16.9653	17.3337	19.2555	19.1918	18.5631	18.6776	19.1237	19.1938	NA	19.0505	18.5108	18.5411	NA	18.5263	18.9456	19.091
CO4A_HUMAN	YRVFALDQK	16.25	-0.429	-0.54	0.59969	0.29	0.59969	NA	15.9526	16.3535	15.1391	16.3751	16.1338	NA	NA	NA	NA	NA	NA	NA	NA	NA	NA	NA	NA	NA	NA	15.5144	NA	NA	17.0048	NA	NA	17.4359	16.4933	16.5775	15.722	NA	NA	NA	NA	NA	NA	NA	NA	NA	NA
CO4A_HUMAN	ADGSYAAWLSR	20.19	-0.163	-0.9	0.37316	0.81	0.37316	20.2605	20.3183	19.9867	19.9076	20.3123	20.0309	19.6029	19.8673	19.5517	19.3927	20.2507	20.4969	19.6325	19.6058	20.6391	20.816	20.2154	20.1882	20.2531	20.406	20.4717	20.6025	20.5043	20.8744	19.1859	NA	20.52	20.3757	19.9346	20.0071	20.692	20.6908	20.1423	20.0439	19.9099	19.7699	20.1716	19.9573	20.9257	20.8794
CO4A_HUMAN	GLCVATPVQLR	22.22	-0.217	-1.23	0.22621	1.52	0.22621	NA	22.1501	22.1911	22.1345	22.015	22.275	NA	NA	21.7288	21.652	22.0371	21.8631	NA	NA	22.4674	22.6802	22.0241	NA	21.9673	22.2801	NA	22.4969	22.4871	22.8483	NA	NA	22.3051	22.148	22.1684	22.1872	22.3553	22.265	22.1506	22.095	22.2153	22.1627	22.1557	NA	22.2837	22.7761
CO4A_HUMAN	KYVLPNFEVK	20.23	-0.28	-1.2	0.2378	1.44	0.2378	20.5624	NA	20.2351	19.8694	20.1281	20.0691	19.4913	19.3295	19.6741	19.7785	20.4436	NA	19.8665	19.3123	20.5746	20.4704	20.5319	NA	20.429	20.0842	20.4883	20.2893	20.2956	20.6345	19.1025	NA	20.6627	20.2465	20.264	20.3686	21.0414	20.5122	20.6221	20.1887	20.4125	20.3915	20.2966	20.2686	21.2822	NA
CO4A_HUMAN	EMSGSPASGIPVK	22.39	-0.067	-0.34	0.7392	0.11	0.7392	22.0418	22.3417	22.5791	22.6701	22.4136	22.4458	22.0598	21.2431	22.0466	22.1578	22.4352	22.5052	21.9141	21.9747	22.9747	22.8627	22.6945	22.6557	22.5017	22.5791	22.7616	22.5025	22.9361	22.4511	21.5702	21.6991	22.6849	22.525	22.6066	22.6319	22.4632	22.9396	22.1244	22.2669	22.0852	22.1664	22.2604	22.1325	22.8098	22.8165
CO4A_HUMAN	RCSVFYGAPSK	17.29	-0.043	-0.16	0.8758	0.02	0.8758	NA	NA	17.5438	17.137	17.1886	NA	17.2402	NA	16.146	NA	NA	17.3067	NA	16.571	17.9419	18.1731	17.4958	16.8653	17.3282	17.1797	17.6998	17.6051	17.6956	17.3985	NA	15.5838	17.9658	17.9061	17.2402	17.2263	17.9569	17.5853	NA	16.8121	NA	16.7709	NA	17.2347	NA	17.256
CO4A_HUMAN	LVNGQSHISLSK	20.17	-0.214	-1.05	0.29831	1.11	0.29831	20.1649	20.4649	19.5056	19.4417	20.5142	20.3824	19.8192	19.3988	19.2378	19.4901	20.0962	19.9938	19.401	19.5297	20.6197	20.7348	20.8081	20.5345	20.809	20.4103	20.7919	20.612	20.6538	20.2432	19.5572	19.5521	20.0397	19.9032	19.9716	20.029	20.5317	20.4961	20.1744	20.2465	20.3703	20.2385	19.9219	20.1812	21.1245	20.9948
CO4A_HUMAN	KADGSYAAWLSR	20.38	-0.323	-1.5	0.14068	2.26	0.14068	20.4251	20.0597	20.6587	20.5083	20.0075	19.3326	20.1179	19.8145	19.7019	19.7604	20.5883	20.7103	20.0013	19.9199	20.8231	20.9246	20.5007	19.7812	20.4518	20.2195	NA	20.6689	20.4945	20.5529	19.9297	NA	20.9458	20.6894	20.5827	20.3263	20.9307	20.5325	20.3862	20.3004	20.5956	20.4941	20.2716	20.5375	21.0886	20.7656
CO4A_HUMAN	LNMGITDLQGLR	21.55	-0.263	-1.67	0.10322	2.78	0.10322	21.4751	21.4927	20.9707	20.9571	21.4457	21.3923	20.7694	21.0233	21.0704	20.967	21.6143	21.4813	20.9865	21.0278	22.0197	22.0692	21.9155	21.9307	21.8898	21.9103	21.9649	22.0837	21.8273	21.9287	20.9093	20.9252	21.6271	21.6909	21.3654	21.3929	21.9609	21.8036	21.7364	21.8884	21.7664	21.5981	21.3154	21.4199	22.3721	22.0892
CO4A_HUMAN	GSFEFPVGDAVSK	21.82	-0.133	-0.8	0.42771	0.64	0.42771	21.3246	21.9569	21.6904	21.7071	21.918	22.0033	21.3036	21.4126	21.6582	21.4866	21.6863	21.7505	21.0802	21.2212	22.3889	22.3795	22.0362	22.1437	21.9107	22.0315	22.2192	22.3387	22.3555	22.4298	21.1864	21.1693	21.9666	21.7961	21.6957	21.6471	21.9958	22.1362	21.6385	21.7761	21.6663	21.6625	21.7787	21.6399	22.235	22.4136
CO4A_HUMAN	DFALLSLQVPLK	20.87	-0.325	-1.6	0.11721	2.56	0.11721	20.8015	20.7696	21.3867	21.2603	20.4812	20.5265	20.2648	20.1711	20.7213	20.6555	21.3937	21.3418	20.5944	20.416	21.6304	21.4057	19.4239	19.2956	20.84	20.7334	21.3634	21.0525	21.1385	21.1031	19.9433	19.9727	21.8518	21.8472	21.2782	21.0633	21.3348	21.2846	20.991	20.8188	20.5466	20.4356	20.733	20.7832	21.4972	21.5811
CO4A_HUMAN	DSSTWLTAFVLK	20.53	-0.637	-2.4	0.02105	5.76	0.02105	20.2996	20.1809	20.1469	20.2621	19.7788	19.7872	19.7542	19.6921	20.1538	20.0383	21.0497	21.0436	19.1445	18.8387	21.5416	21.5339	20.1767	19.7803	20.5367	20.5294	20.4239	20.2173	21.5378	21.5418	18.5785	18.8653	21.3736	21.2616	20.3596	20.3251	21.2864	21.1641	21.6751	21.4624	21.134	21.0025	20.9176	21.0108	21.2851	21.5834
CO4A_HUMAN	SFFPENWLWR	17.91	-0.819	-1.58	0.12273	2.49	0.12273	16.9841	16.6647	18.9155	18.8245	16.1443	14.7374	15.9163	16.867	17.4704	17.1654	18.8832	19.2264	18.0589	17.0669	18.8418	19.7662	NA	NA	16.4076	16.752	17.8219	17.5917	17.5985	18.0701	16.5993	15.8893	19.3941	19.7456	18.4944	18.4152	19.2529	18.9693	18.1274	18.553	19.1513	18.4011	18.208	19.3838	17.936	18.4318
CO4A_HUMAN	TEQWSTLPPETK	20.41	-0.003	-0.01	0.99361	0	0.99361	20.6573	20.6238	19.8481	19.9417	20.7841	20.7011	20.0794	20.0953	20.1168	19.9637	20.5208	19.0721	19.9657	19.83	21.1834	21.0135	21.1063	21.1463	20.7357	20.742	20.854	20.9878	20.9263	21.0358	19.5098	19.7229	20.6445	20.6558	20.3224	18.7735	21.083	21.0304	20.4993	18.9056	20.2626	20.3575	20.2058	19.9647	21.1641	21.2832
CO4A_HUMAN	GLEEELQFSLGSK	19.41	-0.079	-0.1	0.92186	0.01	0.92186	20.7903	19.5709	19.2903	18.9304	20.4958	19.8119	20.5766	18.3435	18.1997	17.9456	19.527	18.3021	18.2943	18.4686	21.373	19.9437	19.5956	18.2508	20.8157	18.2224	20.3681	19.1827	21.4331	19.3051	17.7742	NA	20.2196	20.2847	18.9176	19.4645	20.578	19.6069	19.5983	19.095	18.6047	16.327	19.4472	18.5527	21.5341	20.0142
CO4A_HUMAN	AEMADQASAWLTR	19.68	0.402	0.61	0.55635	0.37	0.55635	NA	NA	19.5138	19.3445	19.0033	18.5932	NA	NA	NA	NA	NA	NA	NA	NA	NA	NA	21.4848	21.1143	NA	NA	NA	NA	NA	NA	NA	NA	NA	NA	NA	NA	NA	NA	NA	NA	19.1989	19.1335	NA	NA	19.737	19.6934
CO4A_HUMAN	VLSLAQEQVGGSPEK	21.92	-0.164	-1.01	0.31836	1.02	0.31836	21.8067	21.8733	21.6586	21.7591	21.8436	21.9322	21.2525	21.4138	21.5373	21.5068	21.8664	22.1086	21.2241	21.417	22.2845	22.214	22.2976	22.5979	22.0378	22.1867	22.208	22.5035	22.1226	22.3943	21.0502	21.1637	22.1138	22.107	21.8537	22.0053	22.2276	22.2034	21.8065	21.9265	21.8772	21.9202	21.8551	21.7132	22.4938	22.559
CO4A_HUMAN	GPEVQLVAHSPWLK	22.64	-0.214	-1.41	0.16503	2	0.16503	22.5946	22.5649	23.0555	23.0026	22.2624	22.279	22.2811	22.292	22.3293	22.3111	23.0188	22.888	22.2421	22.1331	23.1272	23.1257	22.2091	22.0353	22.482	22.4307	23.0006	22.9656	22.9116	22.9178	21.799	21.7446	23.4243	23.2191	22.9503	22.8596	23.0019	22.9833	22.4736	22.4473	22.5871	22.4888	22.527	22.4272	23.1645	23.0443
CO4A_HUMAN	TTNIQGINLLFSSR	21.98	-0.561	-1.96	0.05649	3.85	0.05649	22.2574	22.2467	18.7278	18.2266	22.3263	22.3674	21.596	21.7756	21.6411	21.7736	22.2113	22.2981	21.3993	21.4109	22.7991	22.7332	22.0648	22.1149	22.007	21.989	22.4772	22.6053	22.5108	22.5957	21.483	21.556	22.3601	22.5738	22.2095	22.185	22.4729	22.4251	22.1922	22.1926	22.0393	21.9631	21.8555	21.8849	22.888	22.7097
CO4A_HUMAN	YIYGKPVQGVAYVR	22.34	-0.194	-1.21	0.23342	1.46	0.23342	22.3986	22.2802	21.6724	21.996	22.2968	22.3517	22.1194	22.027	21.8599	21.7633	22.3535	22.285	21.5952	21.6981	22.8441	22.7589	22.6103	22.5895	22.6928	22.5995	22.6895	22.7651	22.6328	22.8084	21.4859	21.6051	22.3793	22.3654	22.2817	22.0846	22.7714	22.6935	22.5134	22.4486	22.5036	22.1384	22.3922	22.2596	22.9668	22.8802
CO4A_HUMAN	EELVYELNPLDHR	22.01	-0.036	-0.23	0.82037	0.05	0.82037	22.113	22.1638	22.0419	22.0561	22.0314	21.9089	21.6635	21.7793	21.7976	21.6636	22.4167	22.3756	21.7179	21.6441	22.5516	22.5729	21.7452	21.6863	21.9848	21.9525	22.3078	22.489	22.2568	22.3822	21.3324	21.2536	22.4478	22.4554	22.1276	22.101	22.4819	22.3626	21.7678	21.7835	21.8198	21.4513	21.3022	21.705	22.3892	22.3684
CO4A_HUMAN	HLVPGAPFLLQALVR	21.87	-0.67	-1.96	0.05654	3.85	0.05654	22.2117	21.7502	22.5918	22.2699	21.5066	21.5465	21.3845	21.0725	21.6413	21.6939	22.5967	22.4449	21.7044	21.4751	22.9847	22.6148	18.3888	17.8634	21.6651	21.2659	22.4522	22.1527	22.6353	22.3562	21.1412	21.1604	23.0417	22.8295	22.4334	22.2756	22.5777	22.303	22.1735	21.6988	22.1257	21.8021	22.2092	22.1158	22.3835	22.2109
CO4A_HUMAN	DFALLSLQVPLKDAK	21.81	-0.254	-1.42	0.16187	2.03	0.16187	21.6325	21.8576	22.0622	22.0782	21.8969	21.9235	21.4591	21.3328	21.4179	21.5764	22.1367	22.0454	21.3021	21.2635	22.4845	22.3929	21.0891	20.8276	21.5001	21.3968	22.3502	22.0425	22.3486	22.1729	21.1599	20.9204	22.3893	22.6771	22.2595	22.206	21.93	22.0182	21.8418	21.6489	21.8314	21.6224	21.5248	21.58	22.0091	22.2217
CO4A_HUMAN	EPFLSCCQFAESLR	22.83	-0.145	-0.95	0.34559	0.91	0.34559	22.9905	23.0417	22.8584	22.948	22.682	22.6471	22.2514	22.5205	22.4494	22.4692	23.0887	23.068	22.5911	22.5757	23.3406	23.47	22.4116	22.3462	22.5193	22.8199	23.059	23.2565	23.0109	23.2651	22.1506	22.2219	23.0833	23.2347	23.0204	23.0669	23.2281	23.2217	22.6724	22.7887	22.697	22.6785	22.3458	22.5766	23.114	23.2962
CO4A_HUMAN	RHLVPGAPFLLQALVR	19.14	-0.219	-0.3	0.76544	0.09	0.76544	19.9143	19.566	17.3137	17.3271	19.6593	19.3596	18.9106	18.8598	19.0755	19.0435	16.8318	19.8996	19.1932	18.785	20.1527	20.2547	NA	NA	18.7207	18.7413	20.1321	20.074	20.1268	20.3467	18.725	18.4539	18.1078	20.1713	19.9485	19.8657	20.5023	19.9375	18.4105	19.1051	16.906	NA	16.5704	19.7114	19.8379	19.7566
CO4A_HUMAN	EPFLSCCQFAESLRK	21.35	-0.124	-0.84	0.40802	0.7	0.40802	21.754	21.522	21.6191	21.5583	21.1337	21.1658	20.9794	21.2084	21.0766	21.0297	21.5437	21.3025	21.0014	21.1231	21.6591	21.8365	21.0553	21.056	21.0722	21.1095	21.4665	21.6286	21.5818	21.8688	20.689	20.6529	22.0268	21.9708	21.6765	21.5746	21.7535	21.6791	20.9233	20.9897	21.1341	21.2035	21.1805	21.1459	21.541	21.597
CO4A_HUMAN	LLATLCSAEVCQCAEGK	20.61	-0.091	-0.39	0.696	0.15	0.696	20.7809	20.7253	20.9615	20.9943	20.8825	21.0541	19.9866	19.8265	20.3074	20.5691	20.4944	20.1094	19.1656	19.2896	21.047	20.9949	20.3627	20.6242	21.7546	21.4134	21.537	21.537	20.8922	20.966	19.553	19.3702	20.5483	20.4937	21.0351	20.8756	20.3372	20.2903	20.9281	20.8085	20.115	20.0705	20.3409	20.2103	21.7204	21.5361
CO4A_HUMAN	GCGEQTMIYLAPTLAASR	20.71	-0.454	-2.09	0.04525	4.37	0.04525	NA	20.9062	20.4532	NA	21.0921	21.204	19.6421	NA	NA	NA	NA	19.7241	NA	20.0821	20.5736	20.6684	19.8585	20.4337	NA	20.5266	21.1705	21.1634	21.2758	21.2619	20.9984	21.0987	20.8162	21.1377	20.6206	20.7894	20.7844	20.9517	NA	20.2295	NA	20.3311	NA	20.1981	21.1979	21.4064
CO4A_HUMAN	GHLFLQTDQPIYNPGQR	19.91	0.132	0.7	0.49067	0.48	0.49067	20.518	20.4721	20.1454	20.3057	20.3978	20.3409	20.0034	20.1327	19.3403	19.2777	20.5816	20.7253	19.5857	19.7587	18.9826	19.0274	20.3691	20.2236	19.6435	19.6396	20.7371	20.7048	18.7149	18.8779	19.5214	19.45	20.2407	19.9183	20.3619	20.317	20.0328	20.0242	19.3931	19.4762	19.5937	19.5557	19.694	19.7086	20.2732	20.2262
CO4A_HUMAN	AVGSGATFSHYYYMILSR	21.01	-0.202	-0.17	0.86325	0.03	0.86325	21.3507	21.4122	16.2494	22.0796	21.0664	21.1977	20.9845	21.1755	21.0145	21.243	21.9862	21.8847	20.9805	20.6934	22.005	22.0897	19.576	19.2661	20.8555	21.001	21.7967	21.4285	21.8743	21.7308	20.6348	20.1364	22.2718	22.4112	21.9247	21.8855	21.7096	21.8411	21.4379	21.3269	17.0461	21.46	16.1424	21.3494	21.9741	21.7604
CO4A_HUMAN	DDPDAPLQPVTPLQLFEGR	20.55	-0.057	-0.28	0.77897	0.08	0.77897	20.8068	21.16	20.2273	20.5379	20.6948	20.9046	19.7627	19.9063	20.3199	20.2297	20.7625	20.8379	19.9727	19.985	21.051	21.28	20.6224	20.44	20.5665	20.2665	20.9774	20.771	21.1041	21.1366	19.689	19.8135	20.237	20.3145	20.8127	20.9281	20.9665	21.1052	20.522	20.4479	20.2569	20.0149	19.8214	20.3283	20.8855	21.3516
CO4A_HUMAN	VGLSGMAIADVTLLSGFHALR	21.69	-0.513	-1.38	0.17484	1.91	0.17484	21.5547	21.253	23.0063	22.5027	20.8493	20.909	21.0819	20.9764	21.6564	21.4374	22.687	22.2639	21.7337	21.3366	22.7579	22.4499	19.1363	18.3612	21.3491	21.3282	21.8016	21.3086	22.4387	21.8085	20.6884	20.1637	23.3568	23.2031	22.4646	22.2901	22.5173	22.0709	21.9962	21.2935	21.7396	21.3368	21.9912	21.9522	22.2969	22.1686
CO4A_HUMAN	RGHLFLQTDQPIYNPGQR	22.43	0.046	0.28	0.78197	0.08	0.78197	22.9767	22.9108	22.396	22.557	22.6931	22.59	22.9415	22.8999	21.9361	21.8294	22.8163	22.9422	22.0491	22.1641	21.7816	21.8569	22.7446	22.5015	22.2697	22.2713	23.0661	22.9983	21.4664	21.8741	22.2472	22.0303	22.7032	22.8181	22.6471	22.6145	22.5619	22.5982	22.1506	22.1615	22.1438	22.0614	22.4419	22.279	22.7462	22.6002
CO4A_HUMAN	MRPSTDTITVMVENSHGLR	22.04	-0.226	-1.19	0.24043	1.42	0.24043	22.2829	22.1305	22.2156	22.1883	21.8153	21.6144	21.892	21.7588	21.574	21.5141	22.1332	22.2808	21.2432	21.1219	22.7139	22.6197	21.6075	21.2344	22.3017	22.2562	22.5148	22.3645	22.614	22.4757	21.181	20.7967	22.815	22.4111	22.1235	22.1225	22.2657	22.1742	22.0165	22.0357	22.1101	21.9354	21.91	21.8526	22.6973	22.598
CO4A_HUMAN	ALEILQEEDLIDEDDIPVR	20.96	-0.297	-1.18	0.24652	1.38	0.24652	20.9316	21.2	20.5652	20.454	20.9782	21.2628	20.5222	20.2533	20.2971	20.5472	21.305	20.9802	20.3284	20.1188	21.7707	21.4345	20.989	20.3096	21.3869	20.629	21.3186	20.9926	21.7512	21.0032	20.5347	20.0765	21.2989	21.2557	20.9974	20.6831	21.3733	21.203	21.5614	21.1812	21.1582	20.9209	20.8072	20.7511	21.5929	21.7466
CO4A_HUMAN	AACAQLNDFLQEYGTQGCQV	22.41	0.017	0.07	0.94219	0.01	0.94219	22.0166	22.9484	22.1831	22.4967	22.666	22.7876	22.2962	22.3645	22.1307	22.3726	22.5776	22.6658	21.89	22.0483	22.8459	23.3282	22.2714	21.8902	22.3181	22.2565	22.9595	22.502	22.8019	22.4008	21.9386	21.7255	22.6014	22.9322	22.4519	22.4881	22.1177	22.5992	22.4638	22.5588	22.0339	22.0457	21.6579	22.127	22.642	22.964
CO4A_HUMAN	EGAIHREELVYELNPLDHR	22.3	-0.29	-1.76	0.08664	3.08	0.08664	22.5292	22.4849	22.0681	22.0185	22.3277	22.3302	22.0826	22.2997	21.6671	21.6422	22.2607	22.286	21.7215	21.5383	22.6451	22.8299	21.9453	21.7087	22.3971	22.3784	22.7342	22.7135	22.682	22.857	21.6065	21.5526	22.8523	22.7146	22.1697	22.1478	22.7169	22.6766	22.0964	22.1432	22.5719	22.5302	21.8766	22.3503	23.0432	22.9161
CO4A_HUMAN	AEFQDALEKLNMGITDLQGLR	16.63	-0.313	-0.49	0.64382	0.24	0.64382	NA	NA	NA	NA	NA	NA	NA	NA	NA	NA	NA	NA	NA	NA	16.2968	NA	NA	NA	NA	NA	NA	NA	16.5656	NA	NA	NA	17.1769	16.939	NA	NA	16.1704	NA	NA	NA	NA	NA	NA	NA	NA	NA
CO4A_HUMAN	VTASDPLDTLGSEGALSPGGVASLLR	23.33	-0.311	-1.95	0.05785	3.81	0.05785	23.2147	23.3832	23.3417	23.5302	22.9781	23.2953	22.6072	22.8316	22.9784	22.9597	23.6531	23.6722	22.974	22.8875	23.6864	23.7454	22.8504	22.7101	23.243	22.916	23.6708	23.5715	23.4689	23.5124	22.6683	22.6868	23.7117	23.7872	23.4445	23.51	23.7175	23.7758	23.5506	23.4135	23.6694	23.3767	23.101	23.3316	23.7132	23.9912
CO4A_HUMAN	TLEIPGNSDPNMIPDGDFNSYVR	21.2	-0.154	-0.83	0.41117	0.69	0.41117	21.2613	21.3689	21.3163	21.6767	20.9243	21.2341	20.7703	20.9843	20.6689	20.9992	21.5823	21.7518	20.6764	20.5309	21.7899	21.7921	20.5678	20.4506	20.9507	21.0854	21.4691	21.4124	21.3896	21.3949	20.6366	20.3857	21.6942	22.0051	21.3707	21.5756	21.349	21.4537	21.0753	21.294	21.0163	20.9268	20.6488	20.9971	21.677	21.6992
CO4A_HUMAN	LTVAAPPSGGPGFLSIERPDSRPPR	22.93	-0.228	-1.59	0.1198	2.52	0.1198	23.0169	23.1095	22.9813	22.9122	22.7724	22.812	22.6526	22.7458	22.6157	22.5023	22.6925	22.708	22.2637	22.2915	23.3174	23.3083	22.9337	22.948	22.819	22.8855	23.2429	23.2941	23.1535	23.3456	21.9788	22.056	23.6758	23.5455	22.966	22.9544	23.4317	23.3191	22.7391	22.6626	22.9322	22.9537	22.8362	22.8555	23.4255	23.473
[truncated: 1,853 more rows]
