# Supplementary material for: Analysis of the Cerebrospinal Fluid Proteome in Alzheimer's Disease
Source: PLoS One. 2016 Mar 7;11(3):e0150672. doi: 10.1371/journal.pone.0150672 (PMC4780771; doi:10.1371/journal.pone.0150672)
Supplement: S4 Table — (XLSX) [file pone.0150672.s035.xlsx]

## Sheet: Sheet1
S4 Table. The proteins with statistically significantly altered levels in the antibody-based profiling. The fold changes and p-values of the exact same peptides used for selecting the targets were also computed based on spiked-in normalized data (in case of multiple antibodies, the one in bold was used for p-value calculation).MS: Mass spectrometry
Uniprot AC	Uniprot ID	Official Gene name/ Synonyms	Antibody	Antibody-based analysis		Reference Normalization (MS)			Spiked-in Normalization (MS)
				p-value	Fold change	Median p-value	Fisher's p-value	Fold change (MS)	Median p-value	Fisher's p-value	Fold change
P02750	A2GL_HUMAN	LRG1/ LRG	HPA001888	0.004	-0.348	<0.05	<0.05	-1.188	<0.05	<0.05	-1.579
O95445	APOM_HUMAN	APOM/ G3A NG20 HSPC336	HPA051006;HPA056226;HPA044180	0.01	-0.438	0.012	0.012	-1.239	0.021	0.021	-1.577
P02746	C1QB_HUMAN	C1QB/	HPA052116	0.037	-0.395	0.016	0.002	-0.436	0.011	0.001	-0.866
P02747	C1QC_HUMAN	C1QC/ C1QG	HPA001471	0.017	-0.174	0.017	0.017	-0.403	0.009	0.009	-0.834
P09871	C1S_HUMAN	C1S	HPA018852	0.022	-0.342	0.038	0.038	-1.282	0.047	0.047	-1.704
P12109	CO6A1_HUMAN	COL6A1	HPA019142;HPA029401;HPA029402	0.001	-0.141	0.009	0.009	0.675	0.568	0.568	0.163
Q12805	FBLN3_HUMAN	EFEMP1 /FBLN3 FBNL	HPA062231	0.008	-0.15	0.022	0.022	0.505	0.644	0.644	0.128
P18428	LBP_HUMAN	LBP	HPA001508	0.001	-0.566	0.041	0.041	-1.479	0.22	0.22	-1.341
Q96PD5	PGRP2_HUMAN	PGLYRP2/ PGLYRPL PGRPL UNQ3103/PRO10102	HPA046311;HPA043568	0.043	-0.3	0.019	0.019	0.743	0.877	0.877	0.081
P23471	PTPRZ_HUMAN	PTPRZ1 /HTPZP2 PTPRZ PTPRZ2 PTPZ	HPA015103	0.018	-0.143	0.029	<0.05	0.41	0.861	0.997	-0.018
Q53EL9	SEZ6_HUMAN	SEZ6	HPA011777;HPA007703;HPA012067	0.011	-0.215	0.023	0.023	0.667	0.613	0.613	0.263
