# Supplementary material for: Analysis of the Cerebrospinal Fluid Proteome in Alzheimer's Disease
Source: PLoS One. 2016 Mar 7;11(3):e0150672. doi: 10.1371/journal.pone.0150672 (PMC4780771; doi:10.1371/journal.pone.0150672)
Supplement: S23 DataFile — (XLSX) [file pone.0150672.s023.xlsx]

## Sheet: supplementary_table_S4_max_pept
S23 DataFile. Identified and mapped (to a feature) proteins and peptides using Maxquant software.
Protein (Uniprot ID)	Peptide	Mass/Charge	Charge	Score (Andromeda/PEP)
1433E_HUMAN	DSTLIMQLLR	595.335	2	6.03e-10
1433E_HUMAN	LICCDILDVLDK	738.876	2	0.000101
1433E_HUMAN	NLLSVAYK	454.267	2	0.02401
1433Z_HUMAN	DICNDVLSLLEK	709.864	2	4.04e-08
1433Z_HUMAN	FLIPNASQAESK	652.846	2	0.002316
1433Z_HUMAN	SVTEQGAELSNEER	774.861	2	3.7e-16
1433Z_HUMAN	TAFDEAIAELDTLSEESYK	711.336	3	1.13e-06
4ET_HUMAN	KDGDM(ox)TAFN(de)K	563.764	2	0.039811
4F2_HUMAN	GQSEDPGSLLSLFR	753.384	2	5.68e-07
4F2_HUMAN	IGDLQAFQGHGAGNLAGLK	622.999	3	0.007232
4F2_HUMAN	LLTSFLPAQLLR	686.422	2	0.006855
7B2_HUMAN	DFSEDQGYPDPPNPCPVGK	1059.96	2	4.45e-40
7B2_HUMAN	EFQLHQHLFDPEHDYPGLGK	803.054	3	1.41e-30
7B2_HUMAN	KSVPHFSDEDKDPE	815.374	2	1.78e-10
7B2_HUMAN	LLHGVMEQLGIAR	479.607	3	0.000135
7B2_HUMAN	LLHGVMEQLGIARPR	563.991	3	0.069456
7B2_HUMAN	SVNPYLQGQR	581.305	2	2.83e-05
7B2_HUMAN	SVPHFSDEDKDPE	751.326	2	0.000336
7B2_HUMAN	TADDGCLENTPDTAEFSR	999.922	2	7.63e-111
7B2_HUMAN	VSEADIQR	459.238	2	0.002044
A1AG1_HUMAN	EQLGEFYEALDCLR	581.607	3	6.83e-31
A1AG1_HUMAN	NWGLSVYADKPETTK	854.931	2	4.42e-52
A1AG1_HUMAN	NWGLSVYADKPETTKEQLGEFYEALDCLR	1144.89	3	5.42e-13
A1AG1_HUMAN	SDVVYTDWK	556.767	2	5.96e-05
A1AG1_HUMAN	SDVVYTDWKK	620.815	2	1.09e-05
A1AG1_HUMAN	TEDTIFLR	497.764	2	3.37e-06
A1AG1_HUMAN	TYMLAFDVNDEK	723.335	2	2.55e-37
A1AG1_HUMAN	WFYIASAFR	580.799	2	4.05e-06
A1AG1_HUMAN	YVGGQEHFAHLLILR	876.981	2	4.13e-31
A1AG2_HUMAN	EHVAHLLFLR	617.857	2	4.3e-07
A1AG2_HUMAN	EQLGEFYEALDCLCIPR	1056.99	2	2.04e-47
A1AG2_HUMAN	NWGLSFYADKPETTK	878.931	2	1.87e-40
A1AG2_HUMAN	SDVMYTDWK	572.753	2	0.000122
A1AG2_HUMAN	TLMFGSYLDDEK	709.83	2	9.61e-14
A1AT_HUMAN	SVLGQLGITK	508.312	2	0.000576
A1AT_HUMAN	VFSN(de)GADLSGVTEEAPLK	917.466	2	1.85e-20
A1BG_HUMAN	ATWSGAVLAGR	544.797	2	9.36e-06
A1BG_HUMAN	CEGPIPDVTFELLR	823.417	2	1.38e-12
A1BG_HUMAN	CLAPLEGAR	493.759	2	0.000811
A1BG_HUMAN	HQFLLTGDTQGR	686.853	2	5.28e-08
A1BG_HUMAN	IFFHLNAVALGDGGHYTCR	716.687	3	6.42e-12
A1BG_HUMAN	LELHVDGPPPRPQLR	575.326	3	0.020084
A1BG_HUMAN	LHDNQN(de)GWSGDSAPVELILSDETLPAPEFSPEPESGR	1330.96	3	7.43e-17
A1BG_HUMAN	N(de)GVAQEPVHLDSPAIK	837.945	2	3.67e-36
A1BG_HUMAN	SGLSTGWTQLSK	632.831	2	3.5e-08
A1BG_HUMAN	SLPAPWLSMAPVSWITPGLK	1076.09	2	2.45e-15
A1BG_HUMAN	SWVPHTFESELSDPVELLVAES	824.405	3	6.58e-08
A1BG_HUMAN	TPGAAANLELIFVGPQHAGNYR	766.067	3	2.5e-42
A1BG_HUMAN	VTLTCVAPLSGVDFQLR	626.005	3	8.07e-29
A2AP_HUMAN	DSFHLDEQFTVPVEMMQAR	760.686	3	0.008046
A2AP_HUMAN	EDFLEQSEQLFGAKPVSLTGK	775.066	3	9.35e-06
A2AP_HUMAN	ELKEQQDSPGNK	686.839	2	0.000453
A2AP_HUMAN	FDPSLTQR	482.249	2	0.010415
A2AP_HUMAN	GFPIKEDFLEQSEQLFGAK	728.373	3	0.005281
A2AP_HUMAN	HQMDLVATLSQLGLQELFQAPDLR	908.478	3	0.001098
A2AP_HUMAN	IQEFLSGLPEDTVLLLLNAIHFQGFWR	1052.9	3	1.16e-06
A2AP_HUMAN	LGNQEPGGQTALK	656.847	2	2.68e-09
A2AP_HUMAN	LQQVLHAGSGPCLPHLLSR	695.046	3	0.002473
A2AP_HUMAN	LVPPMEEDYPQFGSPK	917.441	2	0.0016
A2AP_HUMAN	MSLSSFSVNRPFLFFIFEDTTGLPLFVGSVR	1170.94	3	1.61e-06
A2AP_HUMAN	NKFDPSLTQR	603.318	2	0.006498
A2AP_HUMAN	QEDDLANINQWVK	786.887	2	4.06e-05
A2AP_HUMAN	WFLLEQPEIQVAHFPFK	710.379	3	0.000147
A2GL_HUMAN	ALGHLDLSGNR	576.81	2	0.001014
A2GL_HUMAN	DGFDISGNPWICDQNLSDLYR	1243.06	2	8.39e-54
A2GL_HUMAN	DLLLPQPDLR	590.341	2	0.001048
A2GL_HUMAN	ENQLEVLEVSWLHGLK	947.508	2	1.02e-72
A2GL_HUMAN	GQTLLAVAK	450.78	2	5.04e-05
A2GL_HUMAN	LQ(de)ELHLSSNGLESLSPEFLR	757.066	3	0.004728
A2GL_HUMAN	LQELHLSSN(de)GLESLSPEFLRPVPQLR	987.205	3	1.75e-15
A2GL_HUMAN	NALTGLPPGLFQASATLDTLVLK	1170.66	2	6.72e-25
A2GL_HUMAN	TLDLGENQLETLPPDLLR	1019.05	2	1.48e-29
A2GL_HUMAN	VAAGAFQGLR	495.281	2	7.46e-07
A2GL_HUMAN	YLFLN(de)GNK	484.764	2	0.011358
A2MG_HUMAN	AAQVTIQSSGTFSSK	756.389	2	3.42e-06
A2MG_HUMAN	AFQPFFVELTMPYSVIR	1023.03	2	9.89e-21
A2MG_HUMAN	AIGYLNTGYQR	628.326	2	6.84e-24
A2MG_HUMAN	ALLAYAFALAGNQDK	783.42	2	7.05e-41
A2MG_HUMAN	ALLAYAFALAGNQDKR	574.65	3	0.001405
A2MG_HUMAN	ATVLNYLPK	509.801	2	1.61e-07
A2MG_HUMAN	AVDQSVLLMKPDAELSASSVYNLLPEK	973.18	3	0.000278
A2MG_HUMAN	AYIFIDEAHITQALIWLSQR	796.762	3	6.55e-05
A2MG_HUMAN	DLTGFPGPLNDQDN(de)EDCINR	1145.51	2	4.3e-52
A2MG_HUMAN	DMYSFLEDMGLK	724.826	2	1.04e-24
A2MG_HUMAN	DNSVHWERPQKPK	810.916	2	0.00015
A2MG_HUMAN	DTVIKPLLVEPEGLEK	890.509	2	1.29e-14
A2MG_HUMAN	EEFPFALGVQTLPQ(de)TCDEPK	1153.56	2	7.28e-09
A2MG_HUMAN	EQAPHCICAN(de)GR	706.812	2	0.001297
A2MG_HUMAN	ETTFNSLLCPSGGEVSEELSLK	1199.08	2	1.56e-31
A2MG_HUMAN	FEVQVTVPK	523.798	2	0.000249
A2MG_HUMAN	FQVDNNNR	503.739	2	0.002336
A2MG_HUMAN	FSGQLNSHGCFYQQVK	633.966	3	4.22e-05
A2MG_HUMAN	GGVEDEVTLSAYITIALLEIPLTVTHPVVR	1069.26	3	2.73e-12
A2MG_HUMAN	GHFSISIPVK	542.812	2	0.000662
A2MG_HUMAN	GPTQEFKK	467.754	2	0.008252
A2MG_HUMAN	HNVYIN(de)GITYTPVSSTNEK	1069.03	2	6.6e-94
A2MG_HUMAN	HYDGSYSTFGER	709.803	2	6.67e-12
A2MG_HUMAN	IAQWQSFQLEGGLK	802.926	2	4.41e-52
A2MG_HUMAN	KDTVIKPLLVEPEGLEK	636.707	3	6.52e-28
A2MG_HUMAN	KLSFYYLIMAK	688.886	2	1.26e-12
A2MG_HUMAN	KYSDASDCHGEDSQAFCEK	1117.44	2	7.14e-94
A2MG_HUMAN	LHTEAQIQEEGTVVELTGR	704.031	3	4.73e-15
A2MG_HUMAN	LLIYAVLPTGDVIGDSAK	923.023	2	4.25e-15
A2MG_HUMAN	LLLQQVSLPELPGEYSMK	1023.05	2	4.34e-21
A2MG_HUMAN	LPPNVVEESAR	605.826	2	1.56e-05
A2MG_HUMAN	LSFYYLIMAK	624.839	2	7.63e-12
A2MG_HUMAN	LVHVEEPHTETVR	773.405	2	6.05e-09
A2MG_HUMAN	LVHVEEPHTETVRK	558.638	3	0.037769
A2MG_HUMAN	MCPQLQQYEMHGPEGLR	1037.47	2	2.3e-15
A2MG_HUMAN	MVSGFIPLKPTVK	708.918	2	3.11e-08
A2MG_HUMAN	NALFCLESAWK	669.83	2	0.000323
A2MG_HUMAN	NEDSLVFVQTDK	697.844	2	3.39e-44
A2MG_HUMAN	NQ(de)GNTWLTAFVLK	746.402	2	1.17e-36
A2MG_HUMAN	PQYMVLVPSLLHTETTEK	696.035	3	2.21e-05
A2MG_HUMAN	QFSFPLSSEPFQGSYK	924.944	2	6.2e-73
A2MG_HUMAN	QGIPFFGQVR	574.815	2	1.59e-05
A2MG_HUMAN	QQNAQGGFSSTQDTVVALHALSK	796.404	3	1.47e-08
A2MG_HUMAN	QTVSWAVTPK	558.807	2	0.000584
A2MG_HUMAN	SASNMAIVDVK	567.795	2	3.72e-05
A2MG_HUMAN	SIYKPGQTVK	560.822	2	0.006552
A2MG_HUMAN	SLFTDLEAENDVLHCVAFAVPK	825.746	3	4.65e-42
A2MG_HUMAN	SLNEEAVKK	509.283	2	0.001594
A2MG_HUMAN	SSGSLLNNAIK	552.307	2	4.84e-05
A2MG_HUMAN	SSSNEEVMFLTVQVK	849.425	2	4.91e-20
A2MG_HUMAN	TAQEGDHGSHVYTK	765.353	2	3.76e-23
A2MG_HUMAN	TEHPFTVEEFVLPK	836.933	2	1.3e-11
A2MG_HUMAN	TEVSSNHVLIYLDK	809.428	2	1.47e-22
A2MG_HUMAN	TGTHGLLVK	463.277	2	0.000679
A2MG_HUMAN	VDLSFSPSQSLPASHAHLR	683.689	3	0.000249
A2MG_HUMAN	VGFYESDVMGR	630.29	2	1.29e-11
A2MG_HUMAN	VSNQTLSLFFTVLQDVPVR	721.732	3	1.1e-14
A2MG_HUMAN	VSVQLEASPAFLAVPVEK	942.528	2	3.47e-21
A2MG_HUMAN	VTAAPQSVCALR	636.841	2	7.5e-09
A2MG_HUMAN	VTGEGCVYLQTSLK	777.896	2	1.48e-22
A2MG_HUMAN	VVSMDENFHPLNELIPLVYIQDPK	937.486	3	9.88e-09
A2MG_HUMAN	VYDYYETDEFAIAEYNAPCSK	850.034	3	0.001369
A2MG_HUMAN	YDVENCLANK	613.28	2	8.8e-19
A2MG_HUMAN	YNILPEKEEFPFALGVQTLPQTCDEPK	1055.19	3	9.49e-22
A2MG_HUMAN	YSDASDCHGEDSQAFCEK	1053.39	2	2.48e-39
A4_HUMAN	AVIQHFQEK	550.299	2	0.000466
A4_HUMAN	CLVGEFVSDALLVPDK	881.459	2	8.4e-15
A4_HUMAN	EQNYSDDVLANMISEPR	990.953	2	5.61e-87
A4_HUMAN	EVCSEQAETGPCR	761.817	2	1.59e-09
A4_HUMAN	EWEEAER	474.707	2	0.053927
A4_HUMAN	GLTTRPGSGLTNIK	707.905	2	6.29e-11
A4_HUMAN	HDSGYEVHHQK	668.806	2	0.000618
A4_HUMAN	ISYGNDALMPSLTETK	870.43	2	2.75e-28
A4_HUMAN	KAVIQHFQEK	614.346	2	1.76e-19
A4_HUMAN	LNMHMNVQN(de)GK	643.311	2	3.56e-09
A4_HUMAN	LVFFAEDVGSNK	663.341	2	2.4e-26
A4_HUMAN	MDVCETHLHWHTVAK	932.436	2	8.71e-17
A4_HUMAN	QQLVETHMAR	606.812	2	0.000357
A4_HUMAN	RLALENYITALQAVPPRPR	726.756	3	0.029975
A4_HUMAN	SQVMTHLR	486.259	2	0.002812
A4_HUMAN	STNLHDYGMLLPCGIDK	967.462	2	3.37e-10
A4_HUMAN	TEEISEVK	467.741	2	0.003
A4_HUMAN	THPHFVIPYR	633.841	2	0.000711
A4_HUMAN	VEAMLNDR	474.235	2	0.003471
A4_HUMAN	VESLEQEAANER	687.829	2	5.98e-44
A4_HUMAN	WDSDPSGTK	496.72	2	0.008382
A4_HUMAN	WYFDVTEGK	572.77	2	0.001621
A4_HUMAN	YLETPGDENEHAHFQK	957.935	2	3.07e-47
AACT_HUMAN	ADLSGITGAR	480.76	2	0.000105
AACT_HUMAN	AVLDVFEEGTEASAATAVK	954.484	2	2.7e-65
AACT_HUMAN	DLDSQTMMVLVNYIFFK	688.678	3	5.87e-15
AACT_HUMAN	DYNLNDILLQLGIEEAFTSK	766.062	3	0.01411
AACT_HUMAN	EIGELYLPK	531.298	2	0.000519
AACT_HUMAN	EQLSLLDR	487.27	2	0.008819
AACT_HUMAN	EQLSLLDRFTEDAK	555.622	3	0.032344
AACT_HUMAN	FNRPFLMIIVPTDTQNIFFMSK	887.131	3	8.01e-06
AACT_HUMAN	GTHVDLGLASANVDFAFSLYK	742.38	3	0.00431
AACT_HUMAN	ITDLIKDLDSQTMMVLVNYIFFK	916.485	3	0.002201
AACT_HUMAN	ITLLSALVETR	608.37	2	5.87e-24
AACT_HUMAN	KLINDYVK	496.793	2	0.007097
AACT_HUMAN	LYGSEAFATDFQDSAAAK	946.44	2	1.53e-78
AACT_HUMAN	MEEVEAMLLPETLK	816.915	2	1.14e-05
AACT_HUMAN	MEEVEAMLLPETLKR	596.98	3	2.98e-09
AACT_HUMAN	NLAVSQVVHK	547.82	2	3.68e-05
AACT_HUMAN	RLYGSEAFATDFQDSAAAK	683.329	3	1.22e-15
AACT_HUMAN	WEMPFDPQDTHQSR	591.927	3	0.008865
AACT_HUMAN	WRDSLEFR	554.781	2	0.014455
AATC_HUMAN	EPESILQVLSQMEK	815.922	2	0.000205
AATC_HUMAN	IANDNSLNHEYLPILGLAEFR	800.417	3	0.000422
AATC_HUMAN	INVSGLTTK	466.775	2	0.04751
AATC_HUMAN	IVASTLSNPELFEEWTGNVK	1117.57	2	1.09e-40
AATC_HUMAN	LALGDDSPALK	550.304	2	0.000876
AATC_HUMAN	NLDYVATSIHEAVTK	554.29	3	0.018244
AATC_HUMAN	TDDCHPWVLPVVK	522.598	3	0.000219
AATC_HUMAN	TPGTWNHITDQIGMFSFTGLNPK	854.754	3	0.001302
AATC_HUMAN	VGGVQSLGGTGALR	636.357	2	0.008905
ABCA2_HUMAN	DAVCSGQAAAR	553.257	2	0.000869
ABCA2_HUMAN	ILTVPESQK	507.796	2	0.067066
ACACA_HUMAN	IHNAN(de)PELTDGQ(de)IQ(de)AM(ox)LRR	726.38	3	0.059463
ACBP_HUMAN	QATVGDINTERPGMLDFTGK	717.357	3	0.058686
ACBP_HUMAN	TKPSDEEMLFIYGHYK	653.317	3	1.17e-05
ACBP_HUMAN	WDAWNELK	531.257	2	0.016822
ACTBL_HUMAN	VAPDEHPILLTEAPLNPK	652.027	3	0.000304
ACTG_HUMAN	AGFAGDDAPR	488.728	2	0.001031
ACTG_HUMAN	DLTDYLMK	499.747	2	0.002189
ACTG_HUMAN	DSYVGDEAQSK	599.765	2	5.73e-05
ACTG_HUMAN	EITALAPSTMK	581.313	2	0.015798
ACTG_HUMAN	GYSFTTTAER	566.768	2	0.000671
ACTG_HUMAN	HQGVMVGMGQK	586.29	2	0.002347
ACTG_HUMAN	IWHHTFYNELR	505.922	3	0.000199
ACTG_HUMAN	QEYDESGPSIVHR	506.24	3	0.057909
ACTG_HUMAN	SYELPDGQVITIGNER	895.95	2	3.69e-28
ACTG_HUMAN	VAPEEHPVLLTEAPLNPK	652.027	3	0.000167
ACTS_HUMAN	YPIEHGIITNWDDMEK	654.309	3	5.21e-06
ADA22_HUMAN	LFEFSLDDLPSEFQQVNITPSK	852.096	3	0.000273
ADA22_HUMAN	SGGEDESRHDALDTR	822.865	2	2.35e-05
ADA22_HUMAN	TDLMAVTLAQSLAHNIGIISDK	771.083	3	0.000569
ADA29_HUMAN	CIMHEGN(de)PPITK	698.84	2	0.01394
ADAM9_HUMAN	QVSYVIQAEGK	611.328	2	0.010425
ADCL2_HUMAN	RN(de)Q(de)HM(ox)PLESR	634.32	2	0.033249
ADCYA_HUMAN	IFQ(de)GQ(de)IN(de)K	474.27	2	0.02967
ADGB_HUMAN	ALEFMDLSQYVRK	533.945	3	0.066155
ADGB_HUMAN	EMTQTGSGSAVWK	691.325	2	0.10518
AFAM_HUMAN	AESPEVCFNEESPK	811.854	2	4.59e-41
AFAM_HUMAN	AIPVTQYLK	516.809	2	0.090243
AFAM_HUMAN	DADPDTFFAK	563.757	2	0.001432
AFAM_HUMAN	DMVEYKDR	528.245	2	0.049019
AFAM_HUMAN	ESLLNHFLYEVAR	795.918	2	9.7e-37
AFAM_HUMAN	FIEDNIEYITIIAFAQYVQEATFEEMEK	1128.88	3	5.32e-12
AFAM_HUMAN	FTDSENVCQER	692.794	2	1.62e-43
AFAM_HUMAN	FTFEYSR	475.225	2	0.011834
AFAM_HUMAN	GQCIINSNK	517.259	2	0.000456
AFAM_HUMAN	GQCIINSNKDDRPK	548.943	3	0.098118
AFAM_HUMAN	HELTDEELQSLFTNFANVVDK	1225.1	2	2.94e-31
AFAM_HUMAN	IAPQLSTEELVSLGEK	571.981	3	3.67e-21
AFAM_HUMAN	ICAMEGLPQK	573.787	2	0.000319
AFAM_HUMAN	KSDVGFLPPFPTLDPEEK	672.683	3	3.18e-07
AFAM_HUMAN	LCFFYNK	496.24	2	0.01153
AFAM_HUMAN	LPNNVLQEK	527.799	2	0.000189
AFAM_HUMAN	RHPDLSIPELLR	723.415	2	2.15e-05
AFAM_HUMAN	RNPFVFAPTLLTVAVHFEEVAK	829.125	3	1.36e-16
AFAM_HUMAN	RPCFESLK	518.766	2	0.000699
AFAM_HUMAN	SDVGFLPPFPTLDPEEK	944.473	2	3.29e-05
AFAM_HUMAN	TINPAVDHCCK	657.801	2	0.000231
AFAM_HUMAN	VMNHICSK	494.739	2	0.001519
AGGF1_HUMAN	KDPDSSATNEEK	660.8	2	0.014415
AGRIN_HUMAN	ALQSNHFELSLR	472.253	3	0.040524
AGRIN_HUMAN	AYGTGFVGCLR	600.796	2	0.000804
AGRIN_HUMAN	SAGDVDTLAFDGR	662.313	2	5.35e-19
AGRIN_HUMAN	SIESTLDDLFR	648.328	2	1.16e-05
AGRIN_HUMAN	STVPVNTNR	494.265	2	0.000696
AGRIN_HUMAN	TEATQGLVLWSGK	695.373	2	4.25e-19
AHNK_HUMAN	ADVDISGPKIDVTAPDVSIEEPEGK	861.101	3	0.10079
AHNK_HUMAN	LEVPDM(ox)NIR	543.785	2	0.029625
AJAP1_HUMAN	AGLAKPPAAAK	497.806	2	0.004197
AJAP1_HUMAN	DQAAALVPK	456.762	2	0.008382
AKAP6_HUMAN	FTDEGESIK	513.244	2	0.06577
AKAP6_HUMAN	LYSEQYTSSSKR	724.855	2	0.007103
AKAP8_HUMAN	QFQLYEEPDTK	699.333	2	0.013809
AKAP9_HUMAN	M(ox)N(de)Q(de)LTQELFSLKRER	947.005	2	0.039641
AKP13_HUMAN	Q(de)GPM(ox)TQ(de)AIN(de)R	558.285	2	0.072047
AL1A3_HUMAN	EEIFGPVQPILK	685.39	2	0.00129
ALBU_HUMAN	ADDKETCFAEEGK	750.32	2	1.28e-08
ALBU_HUMAN	ADDKETCFAEEGKK	814.368	2	1.83e-10
ALBU_HUMAN	ALVLIAFAQYLQQCPFEDHVK	830.767	3	2.27e-07
ALBU_HUMAN	AVMDDFAAFVEK	671.822	2	5.32e-12
ALBU_HUMAN	CCAAADPHECYAK	776.803	2	0.012399
ALBU_HUMAN	CCTESLVNR	569.753	2	3.31e-05
ALBU_HUMAN	DDNPNLPR	470.728	2	0.00693
ALBU_HUMAN	DLGEENFK	476.225	2	0.003247
ALBU_HUMAN	ECCEKPLLEK	653.313	2	0.064312
ALBU_HUMAN	EFNAETFTFHADICTLSEK	754.013	3	0.030382
ALBU_HUMAN	ETYGEMADCCAK	717.771	2	0.000468
ALBU_HUMAN	FQNALLVR	480.786	2	0.002914
ALBU_HUMAN	HPYFYAPELLFFAK	581.637	3	9.65e-06
ALBU_HUMAN	KQTALVELVK	564.854	2	0.003091
ALBU_HUMAN	KVPQVSTPTLVEVSR	547.318	3	2.4e-12
ALBU_HUMAN	KYLYEIAR	528.298	2	0.036807
ALBU_HUMAN	LCTVATLR	467.264	2	0.003328
ALBU_HUMAN	LDELRDEGK	537.775	2	0.000266
ALBU_HUMAN	LKECCEKPLLEK	773.903	2	7.62e-07
ALBU_HUMAN	LVAASQAALGL	507.304	2	0.000152
ALBU_HUMAN	LVNEVTEFAK	575.312	2	3.44e-05
ALBU_HUMAN	MPCAEDYLSVVLNQLCVLHEK	840.077	3	6.22e-31
ALBU_HUMAN	QEPERNECFLQHK	572.271	3	0.078406
ALBU_HUMAN	QNCELFEQLGEYK	829.38	2	1.75e-19
ALBU_HUMAN	QTALVELVK	500.806	2	0.000767
ALBU_HUMAN	RHPDYSVVLLLR	489.953	3	4.96e-06
ALBU_HUMAN	RHPYFYAPELLFFAK	633.67	3	8.77e-08
ALBU_HUMAN	RMPCAEDYLSVVLNQLCVLHEK	892.11	3	1.51e-07
ALBU_HUMAN	RPCFSALEVDETYVPK	637.649	3	1.91e-07
ALBU_HUMAN	SHCIAEVENDEMPADLPSLAADFVESK	992.12	3	3.62e-16
ALBU_HUMAN	SLHTLFGDK	509.272	2	0.000364
ALBU_HUMAN	TCVADESAENCDK	749.793	2	8.49e-27
ALBU_HUMAN	TYETTLEK	492.748	2	0.007374
ALBU_HUMAN	VFDEFKPLVEEPQNLIK	1023.05	2	9.1e-14
ALBU_HUMAN	VHTECCHGDLLECADDR	696.285	3	1.37e-14
ALBU_HUMAN	YICENQDSISSK	722.325	2	1.42e-17
ALBU_HUMAN	YLYEIAR	464.251	2	0.012916
ALDOA_HUMAN	AAQEEYVK	469.236	2	0.004178
ALDOA_HUMAN	ALANSLACQGK	566.793	2	0.000698
ALDOA_HUMAN	ELSDIAHR	470.747	2	0.00466
ALDOA_HUMAN	FSHEEIAMATVTALR	559.288	3	0.002885
ALDOA_HUMAN	GILAADESTGSIAK	666.855	2	4.98e-05
ALDOA_HUMAN	IGEHTPSALAIMENANVLAR	703.038	3	0.000148
ALDOA_HUMAN	KELSDIAHR	534.794	2	0.001904
ALDOA_HUMAN	QLLLTADDR	522.788	2	0.060263
ALDOC_HUMAN	ALQASALNAWR	600.828	2	0.000944
ALDOC_HUMAN	DNAGAATEEFIK	633.305	2	1.29e-06
ALDOC_HUMAN	GILAADESVGSMAK	674.843	2	2.05e-06
ALDOC_HUMAN	GVVPLAGTDGETTTQGLDGLSER	758.381	3	1.79e-05
ALDOC_HUMAN	KELSDIALR	522.807	2	0.002987
ALDOC_HUMAN	RAEVN(de)GLAAQGK	607.337	2	0.000287
ALDOC_HUMAN	RLSQIGVENTEENRR	600.982	3	0.013274
ALDOC_HUMAN	TPSALAILENANVLAR	826.971	2	1.11e-36
ALDOC_HUMAN	VDKGVVPLAGTDGETTTQGLDGLSER	872.444	3	4.34e-07
ALDOC_HUMAN	YTPEEIAMATVTALR	555.956	3	7.44e-17
ALS_HUMAN	DLHFLEELQLGHNR	574.298	3	0.00092
ALS_HUMAN	LAYLQPALFSGLAELR	588.002	3	1.52e-15
ALS_HUMAN	LEYLLLSR	503.801	2	0.002812
ALS_HUMAN	LHSLHLEGSCLGR	493.59	3	0.073051
ALS_HUMAN	NLIAAVAPGAFLGLK	727.941	2	0.000217
ALS_HUMAN	SFEGLGQLEVLTLDHNQLQEVK	833.103	3	0.018389
ALS_HUMAN	SLALGTFAHTPALASLGLSNNR	737.735	3	0.080817
ALS_HUMAN	TFTPQPPGLER	621.828	2	0.03064
ALS_HUMAN	VAGLLEDTFPGLLGLR	835.978	2	2.52e-06
AMBP_HUMAN	AFIQLWAFDAVK	704.885	2	6.62e-07
AMBP_HUMAN	CVLFPYGGCQGN(de)GNK	835.875	2	1.95e-12
AMBP_HUMAN	ECLQTCR	483.711	2	0.019824
AMBP_HUMAN	ETLLQDFR	511.27	2	0.002745
AMBP_HUMAN	EYCGVPGDGDEELLR	854.878	2	1.62e-07
AMBP_HUMAN	GECVPGEQEPEPILIPR	960.481	2	6.25e-16
AMBP_HUMAN	GVCEETSGAYEK	665.285	2	0.000217
AMBP_HUMAN	KEDSCQLGYSAGPCMGMTSR	1117.97	2	6.17e-30
AMBP_HUMAN	KGVCEETSGAYEK	729.333	2	1.17e-07
AMBP_HUMAN	TVAACNLPIVR	607.34	2	4.46e-11
AMBP_HUMAN	VVAQGVGIPEDSIFTMADR	1003.01	2	1.96e-29
AMBP_HUMAN	WYNLAIGSTCPWLK	854.93	2	1.9e-13
AMD_HUMAN	AGIEVQEIK	493.78	2	5.11e-05
AMD_HUMAN	ANILYAWAR	539.296	2	5.77e-08
AMD_HUMAN	DGNYWVTDVALHQVFK	631.317	3	0.001528
AMD_HUMAN	EDVVHVHK	481.757	2	0.007113
AMD_HUMAN	EEEEVLDQGDFYSLLSK	1000.97	2	1.15e-28
AMD_HUMAN	EGPVLILGR	477.293	2	0.000515
AMD_HUMAN	GDHVWDGNSFDSK	732.313	2	0.000527
AMD_HUMAN	GSGGLNLGNFFASR	698.853	2	2.05e-09
AMD_HUMAN	HAVSFMTCTQNVAPDMFR	704.654	3	0.049146
AMD_HUMAN	IPLLQQPK	468.798	2	0.010356
AMD_HUMAN	IPVDEEAFVIDFKPR	592.318	3	2.63e-09
AMD_HUMAN	IVQFSPSGK	481.769	2	0.008488
AMD_HUMAN	MENKPTSSELQK	696.346	2	0.000265
AMD_HUMAN	N(de)GQWTLIGR	522.783	2	0.002035
AMD_HUMAN	NLFYLPHGLSIDK	758.912	2	0.000327
AMD_HUMAN	NNLVIFHR	506.788	2	0.011423
AMD_HUMAN	QSPQLPQAFYPVGHPVDVSFGDLLAAR	970.504	3	7.78e-06
AMD_HUMAN	REEEEVLDQGDFYSLLSK	719.684	3	4.41e-10
AMD_HUMAN	SDMVMMHEHHK	461.199	3	0.045189
AMD_HUMAN	TIPPEANIPIPVK	694.912	2	0.056942
AN20B_HUMAN	TQQ(de)Q(de)TQ(de)EMKEM(ox)YQ(de)NAEAK	729.334	3	0.068418
AN32B_HUMAN	LPN(de)LTHLN(de)LSGN(de)K	710.899	2	0.000365
ANFC_HUMAN	TPPAEELAEPQAAGGGQK	875.934	2	1.83e-31
ANGI_HUMAN	NVVVACEN(de)GLPVHLDQSIFR	756.392	3	0.006884
ANGI_HUMAN	SSFQVTTCK	529.253	2	0.01897
ANGT_HUMAN	AAMVGMLANFLGFR	499.929	3	3.42e-12
ANGT_HUMAN	ADSQAQLLLSTVVGVFTAPGLHLK	1233.19	2	2.87e-25
ANGT_HUMAN	ALQDQLVLVAAK	634.883	2	2.19e-12
ANGT_HUMAN	ANAGKPKDPTFIPAPIQAK	982.552	2	1.45e-08
ANGT_HUMAN	DPTFIPAPIQAK	649.362	2	0.000292
ANGT_HUMAN	FMQAVTGWK	534.271	2	2.78e-05
ANGT_HUMAN	LDAHKVLSALQAVQGLLVAQGR	763.114	3	1.65e-05
ANGT_HUMAN	LDTEDKLR	495.267	2	0.009846
ANGT_HUMAN	LQAILGVPWK	562.846	2	0.000827
ANGT_HUMAN	PFLFAVYDQSATALHFLGR	718.378	3	5.36e-08
ANGT_HUMAN	PKDPTFIPAPIQAK	761.936	2	3.87e-08
ANGT_HUMAN	QPFVQGLALYTPVVLPR	949.549	2	9.84e-21
ANGT_HUMAN	SLDFTELDVAAEK	719.36	2	2.19e-27
ANGT_HUMAN	SLDFTELDVAAEKIDR	607.98	3	2.11e-06
ANGT_HUMAN	TGCSLMGASVDSTLAFNTYVHFQGK	897.757	3	3.88e-06
ANGT_HUMAN	VEGLTFQQNSLNWMK	897.946	2	8.67e-80
ANGT_HUMAN	VGEVLNSIFFELEADER	656.331	3	6.5e-07
ANGT_HUMAN	VLSALQAVQGLLVAQGR	575.013	3	9.26e-48
ANR17_HUMAN	SSSAN(de)SKIGSSAPTTTAANTSLM(ox)GIK	828.087	3	0.034712
ANT3_HUMAN	ADGESCSASMMYQEGK	875.84	2	6.57e-59
ANT3_HUMAN	AFLEVNEEGSEAAASTAVVIAGR	764.389	3	3.1e-06
ANT3_HUMAN	ANRPFLVFIR	616.867	2	0.003179
ANT3_HUMAN	ATEDEGSEQKIPEATNR	937.941	2	4.37e-59
ANT3_HUMAN	DDLYVSDAFHK	655.307	2	3.3e-11
ANT3_HUMAN	DIPMNPMCIYR	705.323	2	2.37e-11
ANT3_HUMAN	ELTPEVLQEWLDELEEMMLVVHMPR	1022.84	3	0.001259
ANT3_HUMAN	EQLQDMGLVDLFSPEK	616.974	3	3.28e-47
ANT3_HUMAN	EVPLNTIIFMGR	695.382	2	1.15e-24
ANT3_HUMAN	FATTFYQHLADSK	764.876	2	5.57e-20
ANT3_HUMAN	FRIEDGFSLK	606.325	2	0.011738
ANT3_HUMAN	GDDITMVLILPKPEK	556.98	3	1.56e-12
ANT3_HUMAN	IEDGFSLK	454.74	2	0.003161
ANT3_HUMAN	ITDVIPSEAINELTVLVLVNTIYFK	1402.79	2	8.18e-13
ANT3_HUMAN	KATEDEGSEQKIPEATNR	1001.99	2	3.53e-93
ANT3_HUMAN	LQPLDFKENAEQSR	837.927	2	5.99e-08
ANT3_HUMAN	NDNDNIFLSPLSISTAFAMTK	1150.07	2	4.88e-22
ANT3_HUMAN	RVAEGTQVLELPFK	529.635	3	8.46e-08
ANT3_HUMAN	SKLPGIVAEGR	563.833	2	0.003876
ANT3_HUMAN	VAEGTQVLELPFK	715.899	2	3.84e-19
ANT3_HUMAN	VAEGTQVLELPFKGDDITMVLILPKPEK	1027.57	3	8.65e-09
ANXA1_HUMAN	N(de)N(de)AQ(de)RQ(de)Q(de)IK	550.303	2	0.062834
AP2B1_HUMAN	APEVSQYIYQVYDSILK	672.683	3	0.011792
APLP1_HUMAN	AALEGFLAALQADPPQAER	984.513	2	1.03e-14
APLP1_HUMAN	CLPGEFVSEALLVPEGCR	678.333	3	6.91e-10
APLP1_HUMAN	DDTPMTLPK	509.25	2	0.001051
APLP1_HUMAN	DELAPAGTGVSR	586.799	2	0.000133
APLP1_HUMAN	EWAMADNQSK	590.259	2	0.0002
APLP1_HUMAN	FQVHTHLQVIEER	545.959	3	3.89e-05
APLP1_HUMAN	GGLQPPDSKDDTPMTLPK	632.985	3	0.010674
APLP1_HUMAN	GSTEQDAASPEK	610.276	2	0.00028
APLP1_HUMAN	HQEAQEACSSQGLILHGSGMLLPCGSDR	1013.47	3	3.36e-12
APLP1_HUMAN	HYQHVAAVDPEK	697.347	2	2.18e-06
APLP1_HUMAN	LVETHATR	463.757	2	0.001749
APLP1_HUMAN	MNPLEQYER	590.277	2	0.000411
APLP1_HUMAN	QALNEHFQSILQTLEEQVSGER	852.762	3	1e-22
APLP1_HUMAN	QMYPELQIAR	624.824	2	0.000365
APLP1_HUMAN	RAALEGFLAALQADPPQAER	708.712	3	1.05e-05
APLP1_HUMAN	SGSCAHPHHQVVPFR	858.413	2	2.81e-09
APLP1_HUMAN	VEQATQAIPMER	686.849	2	5.01e-08
APLP1_HUMAN	VIALINDQR	521.307	2	2.95e-05
APLP1_HUMAN	WEPDPQR	464.22	2	0.048544
APLP2_HUMAN	AVCSQEAMTGPCR	733.813	2	2.27e-06
APLP2_HUMAN	CLVGEFVSDVLLVPEK	902.482	2	0.005292
APLP2_HUMAN	EEVLQYCQEMYPELQITNVMEANQR	1039.14	3	2.51e-09
APLP2_HUMAN	EMIFNAER	505.243	2	0.001955
APLP2_HUMAN	EWEEAELQAK	616.794	2	0.018651
APLP2_HUMAN	FIYGGCGGNR	550.751	2	0.000211
APLP2_HUMAN	GSGVGEQDGGLIGAEEK	801.885	2	1.26e-37
APLP2_HUMAN	HYQHVLAVDPEK	718.371	2	0.00142
APLP2_HUMAN	KGSGVGEQDGGLIGAEEK	577.624	3	3.7e-05
APLP2_HUMAN	LNMHVNIQTGK	627.835	2	4.33e-05
APLP2_HUMAN	MEVCENHQHWHTVVK	645.299	3	0.038369
APLP2_HUMAN	SQVMTHLHVIEER	526.941	3	0.003138
APLP2_HUMAN	VGGLEEERESVGPLR	542.954	3	2.82e-07
APLP2_HUMAN	VPYVAQEIQEEIDELLQEQR	810.412	3	1.28e-10
APLP2_HUMAN	VSIDNWCR	525.246	2	0.003192
APOA_HUMAN	TPEN(de)YPN(de)AGLTEN(de)YCR	949.921	2	8.59e-06
APOA1_HUMAN	AKPALEDLR	506.793	2	0.00243
APOA1_HUMAN	ATEHLSTLSEK	608.315	2	1.14e-08
APOA1_HUMAN	DLATVYVDVLK	618.348	2	1.15e-19
APOA1_HUMAN	DLATVYVDVLKDSGRDYVSQFEGSALGK	1011.51	3	8.99e-05
APOA1_HUMAN	DLEEVKAK	466.259	2	0.030139
APOA1_HUMAN	DSGRDYVSQFEGSALGK	908.43	2	1.03e-27
APOA1_HUMAN	DYVSQFEGSALGK	700.839	2	1.35e-47
APOA1_HUMAN	EQLGPVTQEFWDNLEK	966.971	2	9.24e-87
APOA1_HUMAN	EQLGPVTQEFWDNLEKETEGLR	873.43	3	0.005264
APOA1_HUMAN	EQLGPVTQEFWDNLEKETEGLRQEMSK	1074.52	3	0.00021
APOA1_HUMAN	ETEGLRQEMSK	654.317	2	1.05e-07
APOA1_HUMAN	KWQEEMELYR	706.338	2	3.44e-07
APOA1_HUMAN	LEALKEN(de)GGAR	579.318	2	5.64e-07
APOA1_HUMAN	LLDNWDSVTSTFSK	806.897	2	5.22e-31
APOA1_HUMAN	LREQLGPVTQEFWDNLEK	734.712	3	8.75e-21
APOA1_HUMAN	LREQLGPVTQEFWDNLEKETEGLR	963.158	3	4.9e-13
APOA1_HUMAN	LSPLGEEMR	516.264	2	0.000696
APOA1_HUMAN	LSPLGEEMRDR	651.828	2	0.039543
APOA1_HUMAN	QGLLPVLESFK	615.859	2	3.76e-11
APOA1_HUMAN	QKLHELQEK	576.823	2	0.008768
APOA1_HUMAN	THLAPYSDELR	651.328	2	2.36e-07
APOA1_HUMAN	THLAPYSDELRQR	529.275	3	0.004006
APOA1_HUMAN	VEPLRAELQEGAR	489.936	3	0.000363
APOA1_HUMAN	VKDLATVYVDVLK	731.93	2	8.1e-13
APOA1_HUMAN	VQPYLDDFQK	626.815	2	3.14e-05
APOA1_HUMAN	VQPYLDDFQKK	690.862	2	0.00244
APOA1_HUMAN	VSFLSALEEYTK	693.862	2	3.11e-27
APOA1_HUMAN	VSFLSALEEYTKK	505.609	3	0.000624
APOA1_HUMAN	WQEEMELYR	642.29	2	0.000459
APOA2_HUMAN	AGTELVNFLSYFVELGTQPATQ	795.738	3	8.9e-23
APOA2_HUMAN	EPCVESLVSQYFQTVTDYGK	1175.55	2	3.52e-80
APOA2_HUMAN	EPCVESLVSQYFQTVTDYGKDLMEK	989.465	3	0.018571
APOA2_HUMAN	EQLTPLIK	471.288	2	0.00392
APOA2_HUMAN	EQLTPLIKK	535.335	2	0.031167
APOA2_HUMAN	KAGTELVNFLSYFVELGTQPATQ	1257.15	2	2.17e-17
APOA2_HUMAN	SKEQLTPLIK	578.851	2	2.13e-13
APOA2_HUMAN	SKEQLTPLIKK	642.899	2	3.82e-06
APOA2_HUMAN	SPELQAEAK	486.754	2	0.000193
APOA2_HUMAN	VKSPELQAEAK	600.336	2	1.29e-06
APOA4_HUMAN	ALVQQMEQLR	608.33	2	6.43e-14
APOA4_HUMAN	DKVNSFFSTFK	660.336	2	9.46e-07
APOA4_HUMAN	EAVEHLQK	477.257	2	0.000991
APOA4_HUMAN	ENADSLQASLRPHADELK	997.501	2	3.42e-29
APOA4_HUMAN	IDQNVEELK	544.286	2	2.87e-07
APOA4_HUMAN	IDQNVEELKGR	650.847	2	3.97e-05
APOA4_HUMAN	IDQTVEELR	551.791	2	9.01e-06
APOA4_HUMAN	IDQTVEELRR	629.842	2	0.013527
APOA4_HUMAN	ISASAEELR	488.26	2	3.62e-07
APOA4_HUMAN	KLVPFATELHER	720.404	2	2.33e-05
APOA4_HUMAN	LAPLAEDVR	492.28	2	0.001039
APOA4_HUMAN	LEPYADQLR	552.788	2	0.001493
APOA4_HUMAN	LGEVNTYAGDLQK	704.36	2	4.74e-27
APOA4_HUMAN	LGPHAGDVEGHLSFLEK	903.463	2	1.66e-47
APOA4_HUMAN	LKEEIGKELEELR	793.444	2	1.84e-25
APOA4_HUMAN	LLPHANEVSQK	618.341	2	0.000746
APOA4_HUMAN	LNHQLEGLTFQMK	779.907	2	3.57e-14
APOA4_HUMAN	LTPYADEFK	542.272	2	0.00572
APOA4_HUMAN	LVPFATELHER	656.357	2	0.001839
APOA4_HUMAN	QLTPYAQR	488.765	2	0.003443
APOA4_HUMAN	RQLTPYAQR	566.815	2	0.036508
APOA4_HUMAN	RRVEPYGENFNK	503.592	3	0.070841
APOA4_HUMAN	RVEPYGENFNK	676.834	2	5.32e-05
APOA4_HUMAN	SELTQQLNALFQDK	817.923	2	6.09e-76
APOA4_HUMAN	SLAELGGHLDQQVEEFR	964.48	2	2.79e-59
APOA4_HUMAN	SLAELGGHLDQQVEEFRR	695.356	3	4.46e-05
APOA4_HUMAN	SLAPYAQDTQEK	675.831	2	0.000142
APOA4_HUMAN	TLSLPELEQQQEQQQEQQQEQVQMLAPLES	1179.91	3	0.007406
APOA4_HUMAN	TQVNTQAEQLR	644.337	2	4.05e-17
APOA4_HUMAN	TQVNTQAEQLRR	722.387	2	0.000755
APOA4_HUMAN	VEPYGENFNK	598.783	2	0.000765
APOA4_HUMAN	VNSFFSTFK	538.775	2	1.9e-05
APOB_HUMAN	ATGVLYDYVNK	621.822	2	0.000503
APOB_HUMAN	AVSMPSFSILGSDVR	783.404	2	7.77e-06
APOB_HUMAN	DFSLWEK	462.727	2	0.077579
APOB_HUMAN	EFNLQ(de)NMGLPDFHIPENLFLK	839.427	3	0.046604
APOB_HUMAN	FSVPAGIVIPSFQALTAR	625.357	3	0.00071
APOB_HUMAN	FVTQAEGAK	475.751	2	0.086619
APOB_HUMAN	HSITNPLAVLCEFISQSIK	719.718	3	0.001536
APOB_HUMAN	IADFELPTIIVPEQTIEIPSIK	822.797	3	0.003559
APOB_HUMAN	LTISEQNIQR	601.331	2	0.000859
APOB_HUMAN	NLQNNAEWVYQGAIR	888.445	2	0.067109
APOB_HUMAN	SLHMYANR	496.243	2	0.096228
APOB_HUMAN	SVSDGIAALDLNAVANK	829.442	2	3.35e-10
APOB_HUMAN	TEVIPPLIENR	640.865	2	0.037242
APOB_HUMAN	TSSFALNLPTLPEVK	808.949	2	0.06887
APOB_HUMAN	VELEVPQLCSFILK	558.977	3	3.56e-07
APOB_HUMAN	VNWEEEAASGLLTSLKDNVPK	767.398	3	0.006806
APOB_HUMAN	VPSYTLILPSLELPVLHVPR	748.444	3	2.82e-07
APOB_HUMAN	VQGVEFSHR	529.773	2	0.016112
APOB_HUMAN	VSALLTPAEQTGTWK	801.431	2	0.000708
APOC1_HUMAN	EFGNTLEDK	526.749	2	0.009613
APOC1_HUMAN	EWFSETFQK	601.28	2	0.000613
APOC1_HUMAN	LKEFGNTLEDK	647.338	2	0.002884
APOC1_HUMAN	MREWFSETFQK	744.851	2	0.000121
APOC2_HUMAN	ESLSSYWESAK	643.799	2	0.002101
APOC2_HUMAN	STAAMSTYTGIFTDQVLSVLK	1117.08	2	1.62e-22
APOC2_HUMAN	TAAQNLYEK	519.267	2	0.001055
APOC2_HUMAN	TYLPAVDEK	518.272	2	0.063547
APOC3_HUMAN	DALSSVQESQVAQQAR	858.93	2	2.33e-59
APOC3_HUMAN	GWVTDGFSSLK	598.802	2	1.59e-05
APOD_HUMAN	CPNPPVQENFDVNK	829.386	2	1.24e-40
APOD_HUMAN	CPNPPVQENFDVNKYLGR	716.35	3	0.00032
APOD_HUMAN	IPTTFEN(de)GR	517.768	2	0.000743
APOD_HUMAN	KMTVTDQVNCPK	710.85	2	3.27e-55
APOD_HUMAN	MTVTDQVNCPK	646.803	2	1.27e-44
APOD_HUMAN	NILTSNNIDVK	615.839	2	5.02e-17
APOD_HUMAN	NILTSNNIDVKK	679.886	2	0.000383
APOD_HUMAN	NPNLPPETVDSLK	712.376	2	5.26e-07
APOD_HUMAN	WYEIEKIPTTFEN(de)GR	628.317	3	0.000465
APOE_HUMAN	AATVGSLAGQPLQER	749.405	2	1.53e-31
APOE_HUMAN	AKLEEQAQQIR	657.363	2	6.73e-07
APOE_HUMAN	ALMDETMK	469.72	2	0.000872
APOE_HUMAN	ALMDETMKELK	654.831	2	0.0001
APOE_HUMAN	AYKSELEEQLTPVAEETR	698.352	3	0.00258
APOE_HUMAN	DADDLQKR	480.741	2	0.016173
APOE_HUMAN	DRLDEVKEQVAEVR	843.445	2	3.29e-51
APOE_HUMAN	GEVQAMLGQSTEELR	824.404	2	1.08e-66
APOE_HUMAN	LAVYQAGAR	474.767	2	6.37e-05
APOE_HUMAN	LDEVKEQVAEVR	707.881	2	3.62e-11
APOE_HUMAN	LEEQAQQIR	557.797	2	6.29e-18
APOE_HUMAN	LGADMEDVCGR	611.764	2	2.36e-07
APOE_HUMAN	LGPLVEQGR	484.78	2	0.000909
APOE_HUMAN	LKSWFEPLVEDMQR	593.303	3	3.54e-07
APOE_HUMAN	LQAEAFQAR	517.275	2	0.000257
APOE_HUMAN	QQTEWQSGQR	624.292	2	2.38e-05
APOE_HUMAN	QWAGLVEK	465.756	2	0.008128
APOE_HUMAN	RLAVYQAGAR	552.818	2	1.4e-06
APOE_HUMAN	SELEEQLTPVAEETR	865.926	2	1.17e-79
APOE_HUMAN	SWFEPLVEDMQR	768.862	2	1.49e-33
APOE_HUMAN	TRDRLDEVK	566.31	2	0.004726
APOE_HUMAN	VEQAVETEPEPELR	813.405	2	9.33e-31
APOE_HUMAN	VQAAVGTSAAPVPSDNH	810.903	2	5.8e-37
APOE_HUMAN	WVQTLSEQVQEELLSSQVTQELR	1365.7	2	9.16e-71
APOF_HUMAN	EQAVHNVVQLLPGVGTFYNLGTALYYATQNCLGK	1246.97	3	1.44e-05
APOF_HUMAN	SGVQQLIQYYQDQK	566.622	3	5.4e-09
APOF_HUMAN	SLPTEDCENEK	661.283	2	0.017405
APOH_HUMAN	ATFGCHDGYSLDGPEEIECTK	1193.5	2	2.67e-22
APOH_HUMAN	ATVVYQGER	511.767	2	0.000243
APOH_HUMAN	CPFPSRPDN(de)GFVNYPAKPTLYYK	911.117	3	2.4e-08
APOH_HUMAN	CSYTEDAQCIDGTIEVPK	1043.46	2	1.17e-64
APOH_HUMAN	EHSSLAFWK	552.778	2	0.000841
APOH_HUMAN	FICPLTGLWPINTLK	886.993	2	5.01e-17
APOH_HUMAN	KATVVYQGER	575.815	2	4.55e-05
APOH_HUMAN	KCSYTEDAQCIDGTIEVPK	1107.51	2	3.36e-21
APOH_HUMAN	KFICPLTGLWPINTLK	951.04	2	4.38e-19
APOH_HUMAN	TCPKPDDLPFSTVVPLK	957.506	2	1.39e-11
APOH_HUMAN	TDASDVKPC	496.722	2	0.002415
APOH_HUMAN	TFYEPGEEITYSCK	862.38	2	8.21e-17
APOH_HUMAN	TFYEPGEEITYSCKPGYVSR	1192.05	2	1.49e-21
APOH_HUMAN	VCPFAGILEN(de)GAVR	501.598	3	2.54e-13
APOH_HUMAN	WSPELPVCAPIICPPPSIPTFATLR	940.493	3	1.02e-09
APOH_HUMAN	YTTFEYPNTISFSCNTGFYLN(de)GADSAK	1023.46	3	7.76e-05
APOM_HUMAN	EELATFDPVDNIVFNMAAGSAPMQLHLR	1029.51	3	7.69e-07
APOM_HUMAN	SLTSCLDSK	505.745	2	0.004388
APOM_HUMAN	WIYHLTEGSTDLR	530.936	3	0.000615
AR6P6_HUMAN	RSVLPPDGN(de)GSPVLPDK	583.317	3	0.072055
ARAP3_HUMAN	CAALN(de)QMCTR	612.768	2	0.035958
ARI1A_HUMAN	N(de)SM(ox)TPNPGYQ(de)PSM(ox)NTSDMMGR	772.656	3	0.040405
ARI2_HUMAN	ESEGALNEHM(ox)TSLASVLK	639.32	3	0.034097
ASAH1_HUMAN	ESLDVYELDAK	641.315	2	0.0073
ASCC3_HUMAN	M(ox)QQ(de)LN(de)N(de)M(ox)DEVCYEN(de)VLK	709.989	3	0.053275
ASCC3_HUMAN	RYVDFPITDVLQM(ox)MGR	647.663	3	0.07522
ASPG_HUMAN	RGEDPTIACQK	637.812	2	0.014667
ASPG_HUMAN	TGHIAAGTSTN(de)GIK	664.352	2	2.48e-08
ATAD1_HUMAN	FIN(de)LQ(de)PSTLTDKWYGESQK	752.384	3	0.071644
ATG4A_HUMAN	SIGEWFGPNTVAQ(de)VLKK	625.344	3	0.024388
ATRN_HUMAN	ALYVHGGYK	504.27	2	0.009373
ATRN_HUMAN	GDECQLCEVENR	754.809	2	5.69e-44
ATRN_HUMAN	LTGSSGFVTDGPGNYK	800.387	2	3.74e-10
ATRN_HUMAN	SEAACLAAGPGIR	636.822	2	0.000438
ATS1_HUMAN	GAFYLLGEAYFIQPLPAASER	771.736	3	3.15e-05
ATS1_HUMAN	LHAFDQQLDLELRPDSSFLAPGFTLQNVGR	1128.92	3	1.45e-05
ATS4_HUMAN	MSQTGSHPGR	529.246	2	0.051576
B2MG_HUMAN	DWSFYLLYYTEFTPTEK	1102.02	2	4.25e-15
B2MG_HUMAN	DWSFYLLYYTEFTPTEKDEYACR	999.782	3	3.14e-18
B2MG_HUMAN	SNFLNCYVSGFHPSDIEVDLLK	1277.62	2	1.71e-10
B2MG_HUMAN	SNFLNCYVSGFHPSDIEVDLLKN(de)GER	1004.15	3	5.62e-16
B2MG_HUMAN	VEHSDLSFSK	574.783	2	2.23e-05
B2MG_HUMAN	VNHVTLSQPK	561.817	2	7.76e-07
B3GN1_HUMAN	AKYPNSPR	466.752	2	0.020079
B3GN1_HUMAN	EEAQLATVLAYALSSHCPDMR	1181.56	2	2.03e-41
B3GN1_HUMAN	EMLDQSNQWGGTALVVPAFEIR	1231.11	2	9.85e-42
B3GN1_HUMAN	EPGEFALLR	516.28	2	0.009706
B3GN1_HUMAN	GLREM(ox)LDQSNQWGGTALVVPAFEIR	929.814	3	0.085713
B3GN1_HUMAN	ISQACELHVAGFDFEVLNEGFLVHK	953.81	3	5.95e-19
B3GN1_HUMAN	PAYVVPWQDPWEPFYVAGGK	1153.57	2	8.36e-10
B3GN1_HUMAN	SCQEVFDK	506.724	2	0.000901
B3GN1_HUMAN	TALASGGVLDASGDYR	776.884	2	9.12e-37
B3GN1_HUMAN	TTMDPNDVILATHASVDNLLHLSGLLER	1015.86	3	6.04e-11
B3GN1_HUMAN	WEGPLSVSVFAATK	746.396	2	1.16e-08
B3GN1_HUMAN	WVNLPEESLLR	678.37	2	0.000113
B3GN1_HUMAN	WVNLPEESLLRPAYVVPWQDPWEPFYVAGGK	1214.95	3	8.8e-17
B3GN1_HUMAN	YEAAVPDPR	509.254	2	0.000992
BAHC1_HUMAN	Q(de)QELYALQ(de)Q(de)Q(de)R	702.866	2	0.019744
BAI2_HUMAN	LLAPAALAFR	521.825	2	0.001232
BASP1_HUMAN	AEGAATEEEGTPK	645.297	2	0.013126
BASP1_HUMAN	AEPPKAPEQEQAAPGPAAGGEAPK	766.717	3	0.001772
BASP1_HUMAN	ESEPQAAAEPAEAK	714.337	2	0.000203
BASP1_HUMAN	ETPAATEAPSSTPK	693.841	2	0.00025
BASP1_HUMAN	KTEAPAAPAAQETK	706.873	2	2.71e-08
BASP1_HUMAN	SDGAPASDSKPGSSEAAPSSK	644.965	3	0.06342
BGH3_HUMAN	DGTPPIDAHTR	590.292	2	0.010533
BGH3_HUMAN	DILATN(de)GVIHYIDELLIPDSAK	804.101	3	0.000645
BGH3_HUMAN	GCPAALPLSNLYETLGVVGSTTTQLYTDR	1033.19	3	1.2e-06
BGH3_HUMAN	GDELADSALEIFK	704.354	2	4.77e-13
BGH3_HUMAN	ILGDPEALR	492.28	2	0.026642
BGH3_HUMAN	IPSETLNR	465.257	2	0.029028
BGH3_HUMAN	LTLLAPLNSVFK	658.403	2	0.001227
BGH3_HUMAN	QAGLGNHLSGSER	663.332	2	0.037027
BGH3_HUMAN	QHGPNVCAVQK	619.309	2	0.006191
BGH3_HUMAN	VISTITNNIQQIIEIEDTFETLR	897.48	3	0.051262
BGH3_HUMAN	VLTPPMGTVMDVLK	750.912	2	0.009919
BGH3_HUMAN	YGTLFTMDR	552.264	2	0.000411
BGH3_HUMAN	YLYHGQTLETLGGK	527.276	3	0.00019
BICD1_HUMAN	EIAEHQ(de)LEEALETLKN(de)EREQK	1269.15	2	0.005753
BIRC6_HUMAN	SM(ox)VSTIM(ox)KFLDSGPNK	585.633	3	0.005418
BIRC6_HUMAN	TCPVESLSAINQVEALNNLNK	772.062	3	0.063819
BOD1_HUMAN	QEWN(de)PTM(ox)N(de)KNQLR	829.908	2	0.067831
BRCA2_HUMAN	ELNSPQ(de)MTPFKK	710.369	2	0.061299
BRCA2_HUMAN	VFADIQ(de)SEEILQ(de)HNQ(de)NMSGLEK	844.08	3	0.003767
BTD_HUMAN	DAQEVHCDEATK	701.799	2	5.28e-08
BTD_HUMAN	GDMFLVANLGTK	633.332	2	0.0003
BTD_HUMAN	HVVYPTAWMNQLPLLAAIEIQK	845.798	3	4.8e-05
BTD_HUMAN	ILSGDPYCEK	591.279	2	0.00108
BTD_HUMAN	LSSGLVTAALYGR	654.37	2	1.7e-05
BTD_HUMAN	QEALELMNQNLDIYEQQVMTAAQK	936.79	3	1.64e-07
BTD_HUMAN	SHLIIAQVAK	540.333	2	0.001244
BTD_HUMAN	TSIYPFLDFMPSPQVVR	999.014	2	2.49e-28
BTD_HUMAN	VDLITFDTPFAGR	726.381	2	1.16e-26
C163A_HUMAN	GPDTLWQCPSSPWEK	894.407	2	1.21e-09
C163A_HUMAN	HNCDHAEDAGVICSK	571.576	3	1.11e-07
C163A_HUMAN	LASPSEETWITCDNK	875.902	2	4.8e-31
C163A_HUMAN	LEVFYN(de)GAWGTVGK	770.894	2	0.003391
C163A_HUMAN	LQEGPTSCSGR	596.275	2	0.00119
C163A_HUMAN	LVDGVTECSGR	596.785	2	0.000647
C163A_HUMAN	LVGGDIPCSGR	565.785	2	0.001057
C163A_HUMAN	NWQWGGLTCDHYEEAK	665.289	3	0.051787
C163A_HUMAN	QLGCPTAVTAIGR	672.359	2	2.64e-06
C163A_HUMAN	SSMSETTVGVVCR	706.83	2	0.000251
C1QA_HUMAN	DQPRPAFSAIR	629.339	2	0.059813
C1QA_HUMAN	GHIYQGSEADSVFSGFLIFPSA	1165.06	2	3.58e-07
C1QA_HUMAN	GLFQVVSGGMVLQLQQGDQVWVEKDPK	995.856	3	0.000114
C1QA_HUMAN	KGHIYQGSEADSVFSGFLIFPSA	819.742	3	4.03e-05
C1QA_HUMAN	RSLGFCDTTNK	649.812	2	0.000445
C1QA_HUMAN	SLGFCDTTNK	571.761	2	3.68e-05
C1QB_HUMAN	FDHVITN(de)MNNNYEPR	932.426	2	1.12e-16
C1QB_HUMAN	GNLCVNLMR	538.771	2	8e-05
C1QB_HUMAN	LEQGENVFLQATDK	796.402	2	3.8e-23
C1QB_HUMAN	TINVPLRR	484.804	2	0.011518
C1QB_HUMAN	VPGLYYFTYHASSR	830.91	2	2.15e-16
C1QB_HUMAN	VVTFCDYAYNTFQVTTGGMVLK	838.74	3	9.12e-05
C1QC_HUMAN	FNAVLTNPQGDYDTSTGK	964.456	2	2.23e-80
C1QC_HUMAN	FQSVFTVTR	542.793	2	1.61e-05
C1QC_HUMAN	QTHQPPAPNSLIR	729.895	2	0.000286
C1QC_HUMAN	TNQVNSGGVLLR	629.35	2	2.36e-12
C1QC_HUMAN	VPGLYYFVYHASHTAN(de)LCVLLYR	919.473	3	0.000633
C1QC_HUMAN	VVTFCGHTSK	568.282	2	7.76e-08
C1QT3_HUMAN	SDTSSNHAVLK	579.792	2	0.001038
C1R_HUMAN	CLPVCGKPVNPVEQR	584.968	3	0.008403
C1R_HUMAN	DYFIATCK	509.24	2	0.002412
C1R_HUMAN	EFMSQGNK	470.714	2	0.077942
C1R_HUMAN	ESEQGVYTCTAQGIWK	928.928	2	1.45e-36
C1R_HUMAN	FCGQLGSPLGNPPGK	764.883	2	1.22e-16
C1R_HUMAN	FCGQLGSPLGNPPGKK	552.956	3	0.000187
C1R_HUMAN	GFLAYYQAVDLDECASR	989.455	2	8.13e-07
C1R_HUMAN	IKDCGQPR	487.248	2	0.063352
C1R_HUMAN	IQYYCHEPYYK	782.351	2	4.55e-08
C1R_HUMAN	KEFMSQGNK	534.761	2	0.014827
C1R_HUMAN	LFGEVTSPLFPK	667.872	2	0.000266
C1R_HUMAN	LFGEVTSPLFPKPYPNNFETTTVITVPTGYR	1162.61	3	3.66e-05
C1R_HUMAN	LGNHPIRR	481.786	2	0.065521
C1R_HUMAN	LPVANPQACENWLR	834.42	2	3.7e-16
C1R_HUMAN	LVFQQFDLEPSEGCFYDYVK	1242.58	2	1.3e-40
C1R_HUMAN	MDVFSQNMFCAGHPSLK	656.964	3	0.000641
C1R_HUMAN	MGNFPWQVFTNIHGR	601.964	3	5.75e-08
C1R_HUMAN	NIGEFCGK	462.716	2	0.007391
C1R_HUMAN	NLPN(de)GDFR	466.733	2	0.087851
C1R_HUMAN	PVNPVEQR	469.757	2	0.012474
C1R_HUMAN	QDACQGDSGGVFAVR	783.852	2	4.08e-31
C1R_HUMAN	QGYQLIEGN(de)QVLHSFTAVCQDDGTWHR	1053.83	3	3.29e-05
C1R_HUMAN	QRPPDLDTSSNAVDLLFFTDESGDSR	961.453	3	5.26e-17
C1R_HUMAN	TLDEFTIIQNLQPQYQFR	1127.58	2	5.76e-66
C1R_HUMAN	VLNYVDWIK	575.319	2	0.00059
C1R_HUMAN	VSVHPDYR	486.749	2	0.029846
C1R_HUMAN	WILTAAHTLYPK	707.399	2	3.1e-12
C1R_HUMAN	YTTTMGVNTYK	639.806	2	1.4e-07
C1RL_HUMAN	GSEAINAPGDNPAK	670.826	2	5.36e-09
C1RL_HUMAN	LGNFPWQAFTSIHGR	577.631	3	1.39e-07
C1S_HUMAN	CVPVCGVPR	522.26	2	0.006275
C1S_HUMAN	DVVQITCLDGFEVVEGR	645.988	3	0.054151
C1S_HUMAN	EDTPNSVWEPAK	686.823	2	6.8e-05
C1S_HUMAN	EPTMYVGSTSVQTSR	821.891	2	3.36e-06
C1S_HUMAN	GDSGGAFAVQDPNDK	739.332	2	3.43e-08
C1S_HUMAN	GMDSCKGDSGGAFAVQDPNDK	719.306	3	0.005057
C1S_HUMAN	IIGGSDADIK	494.77	2	0.000445
C1S_HUMAN	LLEVPEGR	456.762	2	0.009431
C1S_HUMAN	MGPTVSPICLPGTSSDYNLMDGDLGLISGWGR	1122.87	3	3.5e-18
C1S_HUMAN	MLTPEHVFIHPGWK	846.441	2	2.78e-07
C1S_HUMAN	NYVDWIMK	534.763	2	0.003626
C1S_HUMAN	QFGPYCGHGFPGPLNIETK	707.008	3	0.000337
C1S_HUMAN	SDFSNEER	492.207	2	0.000867
C1S_HUMAN	SNALDIIFQTDLTGQK	882.463	2	4.17e-47
C1S_HUMAN	SNALDIIFQTDLTGQKK	631.343	3	0.001725
C1S_HUMAN	SSNNPHSPIVEEFQVPYNK	729.356	3	6.52e-07
C1S_HUMAN	TMQENSTPR	532.246	2	0.004674
C1S_HUMAN	TMQENSTPRED	654.281	2	0.00014
C1S_HUMAN	TNFDNDIALVR	639.328	2	4.06e-09
C1S_HUMAN	VEDPESTLFGSVIR	774.899	2	7.85e-23
C1S_HUMAN	VEKPTADAEAYVFTPNMICAGGEK	866.746	3	0.006706
C1S_HUMAN	VGATSFYSTCQSN(de)GK	803.862	2	1.17e-30
C1S_HUMAN	YHGDPMPCPK	601.261	2	0.002049
C99L2_HUMAN	APAKPPGSGLDLADALDDQDDGR	765.369	3	3.18e-05
C99L2_HUMAN	DLEDIVGGGEYKPDK	545.602	3	0.000243
C99L2_HUMAN	RKPIAGGGGFSDK	645.352	2	0.007565
CA2D1_HUMAN	DYCNDLK	464.198	2	0.011909
CA2D1_HUMAN	EAGENWQENPETYEDSFYKR	831.36	3	0.012391
CA2D1_HUMAN	FFGEIDPSLMR	656.324	2	0.005387
CA2D1_HUMAN	FTLCPN(de)GYYFAIDPNGYVLLHPN(de)LQPK	1051.2	3	7.45e-06
CA2D1_HUMAN	FVVTDGGITR	532.791	2	0.000608
CA2D1_HUMAN	GPIQWMACENK	667.306	2	4.51e-06
CA2D1_HUMAN	GYYYEIPSIGAIR	751.389	2	4.16e-05
CA2D1_HUMAN	IIMLFTDGGEER	690.846	2	5.3e-08
CA2D1_HUMAN	IKPVFIEDANFGR	502.609	3	2.23e-06
CA2D1_HUMAN	INTQEYLDVLGR	710.876	2	1.73e-17
CA2D1_HUMAN	INTQEYLDVLGRPMVLAGDK	744.729	3	1.71e-06
CA2D1_HUMAN	KTPNNPSCNADLINR	857.421	2	3.11e-08
CA2D1_HUMAN	LEETITQAR	530.786	2	3.12e-05
CA2D1_HUMAN	LLIQAEQTSDGPNPCDMVK	706.007	3	0.005771
CA2D1_HUMAN	LLKPAVVGIK	519.358	2	0.005705
CA2D1_HUMAN	MIDGESGEK	483.216	2	0.082646
CA2D1_HUMAN	MQEDLVTLAK	574.306	2	0.004069
CA2D1_HUMAN	NREEDPSLLWQVFGSATGLAR	782.733	3	7.93e-07
CA2D1_HUMAN	QLVEIAAR	450.27	2	0.008259
CA2D1_HUMAN	SGPGAYESGIMVSK	691.835	2	3.25e-16
CA2D1_HUMAN	SQEPVTLDFLDAELENDIK	726.027	3	1.63e-21
CA2D1_HUMAN	SYDYQSVCEPGAAPK	836.37	2	1.22e-16
CA2D1_HUMAN	TASGVNQLVDIYEK	768.899	2	6.11e-23
CA2D1_HUMAN	TPNNPSCNADLINR	793.374	2	3.27e-16
CA2D1_HUMAN	VFTFSVGQHNYDR	523.92	3	0.019871
CA2D1_HUMAN	VLLDAGFTN(de)ELVQNYWSK	1049.04	2	3.91e-20
CA2D1_HUMAN	VQAAHQWR	498.263	2	0.018635
CA2D1_HUMAN	YQDLYTVEPNNAR	791.879	2	5.35e-19
CA2D1_HUMAN	YYPASPWVDNSR	727.839	2	0.000436
CAB45_HUMAN	DLGGFDEDAEPR	660.789	2	3.06e-05
CAB45_HUMAN	GFHQEVFLGK	581.307	2	0.017912
CAB45_HUMAN	LEMDGHLNR	542.764	2	0.000829
CAC1A_HUMAN	AGGSGPPQQQQQQQ(de)QQ(de)Q(de)QAVAR	783.387	3	0.047123
CAC1A_HUMAN	PDHTTVDIPPACPPPLNHTVVQVNK	916.138	3	0.073125
CAC1E_HUMAN	Q(de)SRSPSEGRSQTPNR	843.918	2	0.028553
CAD13_HUMAN	DIQGSLQDIFK	632.333	2	1.39e-16
CAD13_HUMAN	INENTGSVSVTR	638.829	2	3.45e-12
CAD13_HUMAN	SIVVSPILIPENQR	782.957	2	0.044622
CAD13_HUMAN	TLEGPVPLEVIVIDQNDNRPIFR	878.814	3	0.002616
CAD13_HUMAN	TPHAEDMAELVIVGGK	556.288	3	3.09e-08
CAD13_HUMAN	VNSDGGLVALR	550.807	2	1.49e-16
CAD13_HUMAN	VVDSDRPER	536.773	2	0.071536
CAD13_HUMAN	YEVSSPYFK	560.272	2	0.001556
CAD18_HUMAN	HIEGETEVHHRPK	784.901	2	8.29e-06
CAD19_HUMAN	MN(de)CYLLLR	541.779	2	0.072173
CADH2_HUMAN	DVHEGQPLLNVK	674.865	2	1.99e-08
CADH2_HUMAN	ESAEVEEIVFPR	468.906	3	0.001981
CADH2_HUMAN	FLIYAQDK	499.272	2	0.003257
CADH2_HUMAN	FLIYAQDKETQEK	806.915	2	1.43e-35
CADH2_HUMAN	KVQYESSEPADFK	764.37	2	1.18e-08
CADH2_HUMAN	LSLKPTLTEESVK	722.917	2	3.59e-08
CADH2_HUMAN	SFPLSSEHAK	551.781	2	0.003553
CADH2_HUMAN	TGFPEDVYSAVLSK	756.883	2	4.23e-06
CADH2_HUMAN	VDEDGMVYAVR	627.296	2	0.000223
CADH2_HUMAN	VQYESSEPADFK	700.323	2	1.18e-05
CADH2_HUMAN	YMQQNIR	476.738	2	0.03139
CADH4_HUMAN	GTQYETNSMDFK	710.807	2	0.000242
CADH4_HUMAN	VGADGTVFATR	547.286	2	1.35e-06
CADM1_HUMAN	CEASNIVGK	489.24	2	0.001305
CADM1_HUMAN	EDDGVPVICQVEHPAVTGNLQTQR	888.102	3	0.000698
CADM1_HUMAN	EGDALELTCEAIGKPQPVMVTWVR	900.457	3	3.99e-34
CADM1_HUMAN	NLMIDIQK	487.771	2	0.003413
CADM1_HUMAN	SDDSVIQLLNPNR	490.924	3	4.38e-06
CADM1_HUMAN	SEVEEWSDMYTVTSQLMLK	759.354	3	5.02e-15
CADM1_HUMAN	YFCQLYTDPPQESYTTITVLVPPR	963.478	3	0.010474
CADM2_HUMAN	AYLTVLGVPEKPQISGFSSPVMEGDLMQLTCK	1165.92	3	5.23e-07
CADM2_HUMAN	GKPLPEPVLWTK	455.603	3	0.000121
CADM2_HUMAN	IIPSTPFPQEGQPLILTCESK	785.748	3	1.51e-07
CADM2_HUMAN	SDDGVAVICR	546.262	2	0.000659
CADM2_HUMAN	YLKEEDANRK	633.328	2	0.009029
CADM3_HUMAN	DHEDSSLQWSNPAQQTLYFGEK	860.727	3	1.14e-22
CADM3_HUMAN	DTATLNCQSSGSKPAAR	882.421	2	8.77e-29
CADM3_HUMAN	EDDGASIVCSVNHESLK	930.426	2	1.53e-28
CADM3_HUMAN	EKDTATLNCQSSGSKPAAR	674.329	3	1.42e-06
CADM3_HUMAN	GNPVPQQYLWEK	729.873	2	0.00027
CADM3_HUMAN	KGDQELHGEPTR	683.84	2	1.93e-11
CADM3_HUMAN	LLLHCEGR	499.267	2	0.008259
CADM3_HUMAN	SDSGTYGCTATSNMGSYK	943.881	2	1.53e-78
CADM3_HUMAN	SLVTVLGIPQKPIITGYK	643.06	3	9.64e-07
CADM4_HUMAN	DDGGIIICEAQNQALPSGHSK	737.356	3	0.00035
CADM4_HUMAN	EGDTLVLTCAVTGNPRPN(de)QIR	771.066	3	7.17e-07
CADM4_HUMAN	EQAVEGGEVELSCLVPR	936.463	2	1.98e-28
CADM4_HUMAN	FQLEEFSPR	576.788	2	0.000226
CADM4_HUMAN	IHASQAVVR	490.786	2	0.000651
CADM4_HUMAN	LHQYDGSIVVIQNPAR	603.992	3	2.1e-06
CADM4_HUMAN	QTQYVLDVQYSPTAR	884.947	2	5.92e-09
CADM4_HUMAN	VWSVASTVR	502.78	2	0.000135
CAH1_HUMAN	ADGLAVIGVLMK	593.847	2	3.79e-08
CAH1_HUMAN	GGPFSDSYR	493.223	2	0.021385
CAH1_HUMAN	YSSLAEAASK	513.759	2	3.14e-05
CAH4_HUMAN	EQILAFSQK	532.293	2	0.009347
CAH4_HUMAN	YLGSLTTPTCDEK	742.851	2	1.97e-08
CAHD1_HUMAN	VLM(ox)DLLPVCN(de)Q(de)DGGN(de)K	886.938	2	0.014822
CALL5_HUMAN	AFSAVDTDGN(de)GTINAQELGAALK	755.045	3	2.5e-12
CALL5_HUMAN	NLSEAQLR	465.754	2	0.061661
CALM_HUMAN	EAFSLFDKDGDGTITTK	615.636	3	0.03774
CALM_HUMAN	VFDKDGN(de)GYISAAELR	585.629	3	0.00028
CALR_HUMAN	DDEFTHLYTLIVRPDNTYEVK	856.759	3	0.051246
CALR_HUMAN	EQFLDGDGWTSR	705.818	2	0.000148
CALR_HUMAN	FYALSASFEPFSNK	804.391	2	8.37e-23
CALR_HUMAN	HEQNIDCGGGYVK	738.831	2	2.03e-05
CALR_HUMAN	IKDPDASKPEDWDER	600.952	3	0.008804
CALR_HUMAN	KPEDWDEEMDGEWEPPVIQNPEYK	987.436	3	1.05e-06
CALY_HUMAN	SILAAIGAYPLSR	666.388	2	6.45e-05
CART_HUMAN	ALDIYSAVDDASHEK	545.262	3	0.012105
CART_HUMAN	GTSCNSFLLK	563.782	2	0.001349
CART_HUMAN	YGQVPMCDAGEQCAVR	920.893	2	5.99e-21
CATB_HUMAN	DIMAEIYK	491.75	2	0.004575
CATB_HUMAN	EQWPQCPTIK	643.814	2	0.000943
CATB_HUMAN	GQDHCGIESEVVAGIPR	608.629	3	0.015686
CATB_HUMAN	ICEPGYSPTYK	657.806	2	0.000243
CATB_HUMAN	SGVYQHVTGEMMGGHAIR	643.974	3	0.067741
CATB_HUMAN	VMFTEDLKLPASFDAR	613.982	3	0.018868
CATD_HUMAN	AIGAVPLIQGEYMIPCEK	995.013	2	1.84e-14
CATD_HUMAN	AYWQVHLDQVEVASGLTLCK	773.06	3	0.080781
CATD_HUMAN	DPDAQPGGELMLGGTDSK	894.41	2	3.37e-07
CATD_HUMAN	EGCEAIVDTGTSLMVGPVDEVR	778.704	3	0.000317
CATD_HUMAN	FDGILGMAYPR	620.314	2	2.01e-05
CATD_HUMAN	ISVN(de)NVLPVFDNLMQQK	980.023	2	1.09e-37
CATD_HUMAN	LLDIACWIHHK	469.252	3	0.002505
CATD_HUMAN	LSPEDYTLK	533.277	2	0.014208
CATD_HUMAN	LVDQNIFSFYLSR	534.616	3	2.72e-36
CATD_HUMAN	QPGITFIAAK	523.306	2	0.013221
CATD_HUMAN	TMSEVGGSVEDLIAK	768.385	2	2.19e-31
CATD_HUMAN	VSTLPAITLK	521.83	2	0.003921
CATD_HUMAN	YSQAVPAVTEGPIPEVLK	949.518	2	6.61e-21
CATD_HUMAN	YYTVFDR	482.233	2	0.009304
CATF_HUMAN	FSDLTEEEFR	636.791	2	0.000763
CATF_HUMAN	TLLCSFQVLDELGR	825.93	2	5.55e-12
CATH_HUMAN	GIMGEDTYPYQGK	729.833	2	1.43e-05
CATH_HUMAN	KGNFVSPVK	488.285	2	0.005249
CATH_HUMAN	N(de)GIPYWIVK	545.309	2	0.065176
CATH_HUMAN	TGIYSSTSCHK	620.785	2	0.005025
CATH_HUMAN	VNHAVLAVGYGEK	678.868	2	0.001008
CATL1_HUMAN	AVATVGPISVAIDAGHESFLFYK	798.09	3	0.077123
CATL1_HUMAN	LYGMNEEGWR	627.783	2	0.000551
CATL1_HUMAN	NHCGIASAASYPTV	724.336	2	0.000463
CATL1_HUMAN	QVMN(de)GFQNR	547.265	2	0.032283
CATL1_HUMAN	VFQEPLFYEAPR	748.383	2	0.000396
CATZ_HUMAN	DQECDKFNQCGTCNEFK	727.288	3	8.09e-07
CATZ_HUMAN	NVDGVNYASITR	654.831	2	2.53e-12
CATZ_HUMAN	VGDYGSLSGR	505.749	2	0.000895
CB071_HUMAN	EPQ(de)EQ(de)PNLLQQ(de)LLQYTVSK	752.734	3	0.030339
CB078_HUMAN	ATQ(de)PSSAN(de)PTQ(de)PTVPQ(de)SAASR	1048.52	2	0.021265
CBG_HUMAN	FNQPFIIMIFDHFTWSSLFLAR	910.802	3	0.001147
CBG_HUMAN	ITQDAQLK	458.759	2	0.003328
CBG_HUMAN	MNTVIAALSR	538.301	2	7.34e-12
CBG_HUMAN	SETEIHQGFQHLHQLFAK	717.365	3	4.36e-06
CBG_HUMAN	WSAGLTSSQVDLYIPK	882.962	2	2.27e-10
CBLN1_HUMAN	EAASN(de)GVLIQMEK	695.356	2	0.000313
CBLN3_HUMAN	AAAGGPGGAALGEAPPGR	738.882	2	0.002315
CBLN4_HUMAN	GSSSSPLGISVR	573.81	2	0.000642
CBPB2_HUMAN	ASASYYEQYHSLNEIYSWIEFITER	1033.82	3	0.004441
CBPB2_HUMAN	DTGTYGFLLPER	684.844	2	0.000264
CBPB2_HUMAN	IHIGSSFEK	509.272	2	0.069571
CBPB2_HUMAN	SFYANNHCIGTDLNR	891.405	2	4.69e-06
CBPE_HUMAN	AASQPGELK	450.743	2	0.001597
CBPE_HUMAN	EGGPNNHLLK	539.786	2	0.004043
CBPE_HUMAN	ELLIFLAQYLCNEYQK	682.352	3	4.23e-15
CBPE_HUMAN	ELLVIELSDNPGVHEPGEPEFK	816.749	3	9.49e-16
CBPE_HUMAN	IHIMPSLNPDGFEK	533.274	3	8.56e-06
CBPE_HUMAN	LLIPGNYK	459.277	2	0.087337
CBPE_HUMAN	LTASAPGYLAITK	653.375	2	3.07e-07
CBPE_HUMAN	NSLISYLEQIHR	491.601	3	4.86e-06
CBPE_HUMAN	SGSAHEYSSSPDDAIFQSLAR	742.342	3	2.42e-06
CBPE_HUMAN	SNAQGIDLNR	544.279	2	1.18e-07
CBPE_HUMAN	TYWEDNK	478.212	2	0.027653
CBPE_HUMAN	VAVPYSPAAGVDFELESFSER	757.371	3	0.004124
CBPE_HUMAN	YIGNMHGNEAVGR	709.336	2	1.01e-05
CBPQ_HUMAN	AIINLAVYGK	531.322	2	0.000276
CBPQ_HUMAN	LALLVDTVGPR	577.351	2	0.000113
CBPQ_HUMAN	SVASFSIYSPHTGIQEYQDGVPK	837.412	3	0.002359
CBPQ_HUMAN	VGALASLIR	450.288	2	0.000229
CC017_HUMAN	IN(de)VQ(de)N(de)N(de)VDLGQ(de)PVKN(de)K	890.49	2	0.070406
CC126_HUMAN	TIAVLLDDILQR	685.407	2	0.000246
CC151_HUMAN	Q(de)EKQ(de)QLQ(de)R	529.292	2	0.002838
CCD19_HUMAN	EM(ox)VWN(de)NN(de)KK	581.788	2	0.068268
CCD34_HUMAN	Q(de)Q(de)QAEIQ(de)EKKEIAEK	900.479	2	0.038949
CCD77_HUMAN	ATVN(de)ARAN(de)Q(de)DLALLCEVRDSNR	829.423	3	0.075644
CCD77_HUMAN	M(ox)NFTPTHTPVCRKR	582.297	3	0.042761
CCD79_HUMAN	KM(ox)GNHWNSILWSFPFQ(de)Q(de)GR	778.385	3	0.029165
CCD87_HUMAN	KTN(de)LSSSHFLEEN(de)Q(de)VRSHLHR	840.434	3	0.064372
CCD87_HUMAN	TTSPEPQKR	522.278	2	0.002618
CCKN_HUMAN	AHLGALLAR	461.286	2	0.009153
CCKN_HUMAN	NLQNLDPSHR	597.305	2	0.001194
CCL14_HUMAN	WVQDYIK	476.251	2	0.011759
CD048_HUMAN	TETLLLQAER	587.328	2	2.18e-14
CD14_HUMAN	AFPALTSLDLSDNPGLGER	987.003	2	9.47e-95
CD14_HUMAN	ATVNPSAPR	456.749	2	0.000629
CD14_HUMAN	ELTLEDLK	480.767	2	0.003109
CD14_HUMAN	FPAIQNLALR	571.838	2	1.18e-07
CD14_HUMAN	GLMAALCPHK	549.284	2	0.001053
CD14_HUMAN	GLMAALCPHKFPAIQNLALR	741.075	3	7.22e-10
CD14_HUMAN	ITGTMPPLPLEATGLALSSLR	1069.6	2	1.41e-15
CD14_HUMAN	LKELTLEDLK	601.356	2	0.000139
CD14_HUMAN	LTVGAAQVPAQLLVGALR	889.039	2	3.46e-29
CD14_HUMAN	RLTVGAAQVPAQLLVGALR	645.062	3	8.47e-07
CD14_HUMAN	SWLAELQQWLKPGLK	899.007	2	5.91e-16
CD14_HUMAN	VLDLSCNR	488.748	2	0.003
CD14_HUMAN	VLSIAQAHSPAFSCEQVR	667.339	3	6.1e-21
CD166_HUMAN	ADIQMPFTCSVTYYGPSGQK	750.679	3	0.082448
CD166_HUMAN	ALFLETEQLK	596.335	2	0.000117
CD166_HUMAN	CLGN(de)GNPPPEEFLFYLPGQPEGIR	901.108	3	0.022896
CD166_HUMAN	EMDPVTQLYTMTSTLEYK	1075.51	2	2.88e-29
CD166_HUMAN	KTDPSGLSK	466.757	2	0.034925
CD166_HUMAN	LDVPQNLMFGK	631.335	2	0.000562
CD166_HUMAN	QIGDALPVSCTISASR	837.928	2	3.07e-07
CD166_HUMAN	SSNTYTLTDVR	628.81	2	2.75e-06
CD166_HUMAN	SSPSFSSLHYQ(de)DAGNYVCETALQEVEGLK	1072.83	3	8.15e-07
CD166_HUMAN	VLHPLEGAVVIIFK	512.317	3	3.22e-09
CD166_HUMAN	YEKPDGSPVFIAFR	542.616	3	1.36e-05
CD3Z_HUMAN	KN(de)PQ(de)EGLYN(de)ELQ(de)KDK	902.466	2	0.034298
CD44_HUMAN	ALSIGFETCR	577.288	2	8.71e-06
CD44_HUMAN	FAGVFHVEKN(de)GR	454.243	3	0.057204
CD44_HUMAN	TEAADLCK	454.214	2	0.005319
CD44_HUMAN	YGFIEGHVVIPR	693.881	2	5.43e-05
CD59_HUMAN	ENELTYYCCK	690.284	2	7.3e-10
CD59_HUMAN	FEHCNFN(de)DVTTR	770.336	2	3.47e-17
CD59_HUMAN	LRENELTYYCCK	824.877	2	2.81e-05
CDHR5_HUMAN	VN(de)STVIPETQLQAEDR	900.461	2	0.045558
CDK1_HUMAN	ISGKM(ox)ALN(de)HPYFNDLDN(de)QIKK	816.09	3	0.041156
CDRT1_HUMAN	EILYWFANSTQWTK	596.299	3	0.081334
CDRT1_HUMAN	IYNFFNGN(de)CM(ox)KVIKAN(de)GR	716.028	3	0.065944
CDY1_HUMAN	M(ox)M(ox)GKASAN(de)EMLIAGR	790.392	2	0.073862
CEA20_HUMAN	N(de)M(ox)ESIYEVLGMQQ(de)	771.353	2	0.043187
CEAM7_HUMAN	EN(de)LVN(de)EEVTR	601.805	2	0.04689
CECR1_HUMAN	FVETHPEFIGIK	472.923	3	0.046915
CECR1_HUMAN	LPYFFHAGETDWQGTSIDR	747.352	3	8.35e-07
CECR1_HUMAN	SQVFNILR	488.783	2	0.002678
CENPE_HUMAN	IN(de)EM(ox)EQLKK	566.806	2	0.073505
CEP70_HUMAN	LGEM(ox)N(de)N(de)AVR	502.254	2	0.031428
CEP76_HUMAN	QEQWCTLLAFLCRN(de)K	983.986	2	0.07103
CERU_HUMAN	AEEEHLGILGPQLHADVGDK	710.028	3	3.53e-15
CERU_HUMAN	AGLQAFFQVQECNK	820.399	2	3.69e-52
CERU_HUMAN	ALYLQYTDETFR	760.376	2	5.49e-34
CERU_HUMAN	DDEEFIESNK	613.265	2	2.02e-27
CERU_HUMAN	DIASGLIGPLIICK	490.619	3	3.16e-23
CERU_HUMAN	DLYSGLIGPLIVCR	525.957	3	3.08e-31
CERU_HUMAN	DVDKEFYLFPTVFDENESLLLEDNIR	1054.18	3	1.9e-11
CERU_HUMAN	EFYLFPTVFDENESLLLEDNIR	1352.16	2	4.59e-11
CERU_HUMAN	ERGPEEEHLGILGPVIWAEVGDTIR	924.816	3	4.35e-08
CERU_HUMAN	EVGPTNADPVCLAK	735.867	2	3.25e-07
CERU_HUMAN	EYTDASFTNR	602.268	2	2.41e-12
CERU_HUMAN	EYTDASFTNRK	666.316	2	2.51e-05
CERU_HUMAN	GAYPLSIEPIGVR	686.386	2	3.98e-05
CERU_HUMAN	GDSVVWYLFSAGNEADVHGIYFSGNTYLWR	1141.87	3	2.02e-08
CERU_HUMAN	GEFYIGSK	450.727	2	0.001519
CERU_HUMAN	GPEEEHLGILGPVIWAEVGDTIR	829.768	3	2.24e-12
CERU_HUMAN	GVYSSDVFDIFPGTYQTLEMFPR	1335.13	2	2.31e-18
CERU_HUMAN	HYYIAAEEIIWNYAPSGIDIFTK	905.455	3	8.35e-13
CERU_HUMAN	HYYIGIIETTWDYASDHGEK	800.038	3	1.66e-39
CERU_HUMAN	HYYIGIIETTWDYASDHGEKK	842.737	3	0.000107
CERU_HUMAN	IDTINLFPATLFDAYMVAQNPGEWMLSCQNLNHLK	1355.66	3	9.29e-16
CERU_HUMAN	KAEEEHLGILGPQLHADVGDK	1128.59	2	3.36e-41
CERU_HUMAN	KAEEEHLGILGPQLHADVGDKVK	828.447	3	5.2e-12
CERU_HUMAN	KALYLQYTDETFR	824.423	2	7.36e-13
CERU_HUMAN	KGSLHAN(de)GR	470.26	2	0.007129
CERU_HUMAN	LEFALLFLVFDENESWYLDDNIK	945.138	3	6.17e-05
CERU_HUMAN	LISVDTEHSNIYLQN(de)GPDR	1086.04	2	3.94e-29
CERU_HUMAN	MFTTAPDQVDKEDEDFQESNK	1237.54	2	3.36e-53
CERU_HUMAN	MHSMN(de)GFMYGNQPGLTMCK	1102.46	2	6.49e-52
CERU_HUMAN	MYSVN(de)GYTFGSLPGLSMCAEDR	819.03	3	6.29e-32
CERU_HUMAN	NLASRPYTFHSHGITYYK	719.029	3	1.16e-06
CERU_HUMAN	NNEGTYYSPNYNPQSR	952.414	2	1.76e-72
CERU_HUMAN	PYTFHSHGITYYK	807.391	2	4.57e-36
CERU_HUMAN	QSEDSTFYLGER	716.323	2	2.55e-08
CERU_HUMAN	QYTDSTFR	509.236	2	0.004455
CERU_HUMAN	QYTDSTFRVPVER	533.271	3	0.071854
CERU_HUMAN	RQSEDSTFYLGER	794.374	2	4.52e-19
CERU_HUMAN	SGAGTEDSACIPWAYYSTVDQVK	1253.07	2	6.52e-34
CERU_HUMAN	SVPPSASHVAPTETFTYEWTVPK	844.42	3	0.000113
CERU_HUMAN	TTIEKPVWLGFLGPIIK	638.049	3	0.000109
CERU_HUMAN	TYCSEPEKVDKDNEDFQESNR	864.039	3	1.38e-06
CERU_HUMAN	VDKDNEDFQESNR	798.351	2	7.87e-60
CERU_HUMAN	VNKDDEEFIESNK	783.868	2	9.37e-27
CERU_HUMAN	WYLFGMGNEVDVHAAFFHGQALTNK	951.459	3	8.07e-06
CERU_HUMAN	YTVNQCR	470.719	2	0.006871
CFAB_HUMAN	AIHCPRPHDFEN(de)GEYWPR	761.017	3	0.001363
CFAB_HUMAN	ALFVSEEEK	526.269	2	0.000395
CFAB_HUMAN	ALFVSEEEKK	590.317	2	1.59e-06
CFAB_HUMAN	CLVNLIEK	494.779	2	0.000361
CFAB_HUMAN	DAQYAPGYDK	564.254	2	0.000195
CFAB_HUMAN	DFHINLFQVLPWLK	885.491	2	3.25e-07
CFAB_HUMAN	DISEVVTPR	508.275	2	0.000219
CFAB_HUMAN	DLEIEVVLFHPNYNIN(de)GK	705.369	3	0.006512
CFAB_HUMAN	DMENLEDVFYQMIDESQSLSLCGMVWEHR	1187.85	3	2.26e-23
CFAB_HUMAN	DNEQHVFK	508.744	2	0.003555
CFAB_HUMAN	EAGIPEFYDYDVALIK	614.977	3	3.39e-12
CFAB_HUMAN	EDYLDVYVFGVGPLVN(de)QVNINALASK	946.496	3	0.056194
CFAB_HUMAN	EELLPAQDIK	578.317	2	3.8e-05
CFAB_HUMAN	EKLQDEDLGFL	653.83	2	3.44e-11
CFAB_HUMAN	EVYIKN(de)GDKK	597.33	2	0.009307
CFAB_HUMAN	FIQVGVISWGVVDVCK	602.659	3	0.055845
CFAB_HUMAN	FLCTGGVSPYADPNTCR	957.928	2	3.44e-21
CFAB_HUMAN	GDSGGPLIVHK	540.296	2	0.000407
CFAB_HUMAN	GDSGGPLIVHKR	618.347	2	0.002633
CFAB_HUMAN	GTDYHKQPWQAK	729.86	2	2.76e-05
CFAB_HUMAN	HVIILMTDGLHNMGGDPITVIDEIR	920.479	3	1.01e-13
CFAB_HUMAN	ISVIRPSK	450.288	2	0.010369
CFAB_HUMAN	KCLVNLIEK	558.827	2	0.082366
CFAB_HUMAN	KDNEQHVFK	572.792	2	1.4e-06
CFAB_HUMAN	KEAGIPEFYDYDVALIK	657.676	3	5.83e-10
CFAB_HUMAN	KEVYIKN(de)GDK	597.33	2	0.000334
CFAB_HUMAN	KGTDYHKQPWQAK	793.908	2	0.000487
CFAB_HUMAN	LEDSVTYHCSR	683.807	2	9.33e-08
CFAB_HUMAN	LLQEGQALEYVCPSGFYPYPVQTR	1408.19	2	2.88e-12
CFAB_HUMAN	LPPTTTCQQQK	651.33	2	1.29e-16
CFAB_HUMAN	LQDEDLGFL	525.262	2	0.000395
CFAB_HUMAN	PICLPCTEGTTR	702.835	2	0.000518
CFAB_HUMAN	PQGSCSLEGVEIK	702.346	2	4.96e-19
CFAB_HUMAN	QLNEINYEDHK	701.834	2	1.22e-16
CFAB_HUMAN	STGSWSTLK	483.749	2	0.000422
CFAB_HUMAN	VASYGVKPR	488.783	2	0.001903
CFAB_HUMAN	VKDISEVVTPR	621.857	2	0.003966
CFAB_HUMAN	VSEADSSNADWVTK	754.847	2	6.32e-17
CFAB_HUMAN	WSGQTAICDN(de)GAGYCSNPGIPIGTR	1326.6	2	1.45e-34
CFAB_HUMAN	YGLVTYATYPK	638.335	2	1.27e-05
CFAB_HUMAN	YGQTIRPICLPCTEGTTR	1062.02	2	2.83e-07
CFAD_HUMAN	ATLGPAVRPLPWQR	781.452	2	0.032586
CFAD_HUMAN	DVAPGTLCDVAGWGIVNHAGR	722.357	3	0.026187
CFAD_HUMAN	GDSGGPLVCGGVLEGVVTSGSR	1030.51	2	1.04e-41
CFAD_HUMAN	LMCAESNR	490.719	2	0.001632
CFAD_HUMAN	LMCAESNRR	568.769	2	0.002618
CFAD_HUMAN	RPDSLQHVLLPVLDR	586.673	3	1.29e-05
CFAD_HUMAN	RTHHDGAITER	646.827	2	0.075512
CFAD_HUMAN	THHDGAITER	568.776	2	0.001429
CFAD_HUMAN	VASYAAWIDSVLA	683.357	2	0.000355
CFAD_HUMAN	VQVLLGAHSLSQPEPSK	597.332	3	0.001316
CFAD_HUMAN	VQVLLGAHSLSQPEPSKR	649.366	3	4.2e-05
CFAH_HUMAN	AQTTVTCMEN(de)GWSPTPR	968.439	2	9.45e-87
CFAH_HUMAN	AVYTCNEGYQLLGEINYR	1082.01	2	1.24e-78
CFAH_HUMAN	CFEGFGIDGPAIAK	741.359	2	8.14e-09
CFAH_HUMAN	CLHPCVISR	571.284	2	0.000794
CFAH_HUMAN	CLPVTAPEN(de)GK	593.301	2	0.00236
CFAH_HUMAN	CNMGYEYSER	654.753	2	0.000453
CFAH_HUMAN	CTLKPCDYPDIK	503.908	3	1.92e-08
CFAH_HUMAN	CTSTGWIPAPR	623.306	2	1.59e-05
CFAH_HUMAN	CYFPYLEN(de)GYNQNYGR	1029.44	2	7.15e-05
CFAH_HUMAN	DGWSAQPTCIK	631.796	2	0.000336
CFAH_HUMAN	DTSCVNPPTVQNAYIVSR	1010.99	2	1.72e-51
CFAH_HUMAN	ECDTDGWTNDIPICEVVK	1075.97	2	3.4e-39
CFAH_HUMAN	EEYGHSEVVEYYCNPR	1015.93	2	4.89e-28
CFAH_HUMAN	EFDHNSNIR	566.263	2	0.000191
CFAH_HUMAN	EGWIHTVCIN(de)GR	721.354	2	2.69e-06
CFAH_HUMAN	EIMENYNIALR	683.346	2	6.4e-33
CFAH_HUMAN	EQVQSCGPPPELLN(de)GNVK	983.489	2	1.41e-94
CFAH_HUMAN	EYHFGQAVR	553.773	2	0.000379
CFAH_HUMAN	FVCNSGYK	487.724	2	0.012474
CFAH_HUMAN	GDAVCTESGWRPLPSCEEK	1089.48	2	3.85e-14
CFAH_HUMAN	GEWVALNPLR	577.82	2	0.002582
CFAH_HUMAN	HGGLYHENMR	607.281	2	0.000166
CFAH_HUMAN	IDVHLVPDR	532.299	2	0.001565
CFAH_HUMAN	IDVHLVPDRK	596.346	2	0.003696
CFAH_HUMAN	IEGDEEMHCSDDGFWSK	1021.4	2	4.4e-29
CFAH_HUMAN	IVSSAMEPDR	552.772	2	0.000859
CFAH_HUMAN	IVSSAMEPDREYHFGQAVR	731.357	3	3.77e-05
CFAH_HUMAN	KCYFPYLEN(de)GYNQNYGR	729.331	3	1.27e-14
CFAH_HUMAN	KEFDHNSNIR	630.311	2	0.001059
CFAH_HUMAN	KGEWVALNPLR	641.867	2	4.77e-05
CFAH_HUMAN	KGEWVALNPLRK	470.946	3	0.00098
CFAH_HUMAN	LEYPTCAK	491.24	2	0.005996
CFAH_HUMAN	LGYVTADGETSGSITCGK	908.426	2	1.54e-29
CFAH_HUMAN	NDFTWFK	479.227	2	0.004855
CFAH_HUMAN	N(de)GFYPATR	463.231	2	0.013982
CFAH_HUMAN	N(de)GQWSEPPK	521.752	2	0.00951
CFAH_HUMAN	NTEILTGSWSDQTYPEGTQAIYK	1301.62	2	6.05e-46
CFAH_HUMAN	PGFTIVGPNSVQCYHFGLSPDLPICK	968.479	3	8.87e-07
CFAH_HUMAN	RNTEILTGSWSDQTYPEGTQAIYK	920.116	3	2.04e-12
CFAH_HUMAN	RPCGHPGDTPFGTFTLTGGNVFEYGVK	971.133	3	6.36e-07
CFAH_HUMAN	RPYFPVAVGK	567.327	2	0.002675
CFAH_HUMAN	SCDIPVFMNAR	655.306	2	2.58e-07
CFAH_HUMAN	SCDNPYIPN(de)GDYSPLR	934.418	2	8.95e-11
CFAH_HUMAN	SIDVACHPGYALPK	764.385	2	3.44e-16
CFAH_HUMAN	SITCIHGVWTQLPQCVAIDK	776.062	3	2.41e-11
CFAH_HUMAN	SLGNVIMVCR	574.8	2	9.11e-14
CFAH_HUMAN	SPDVIN(de)GSPISQK	671.355	2	1.11e-12
CFAH_HUMAN	SPPEISHGVVAHMSDSYQYGEEVTYK	970.78	3	2.38e-09
CFAH_HUMAN	SSNLIILEEHLK	698.396	2	8.18e-13
CFAH_HUMAN	SSQESYAHGTK	597.774	2	0.00106
CFAH_HUMAN	TDCLSLPSFENAIPMGEK	1004.97	2	6.62e-21
CFAH_HUMAN	TGDEITYQCR	621.775	2	3.68e-05
CFAH_HUMAN	TGESVEFVCK	578.272	2	2.06e-05
CFAH_HUMAN	TGESVEFVCKR	656.322	2	0.005586
CFAH_HUMAN	TKEEYGHSEVVEYYCNPR	754.005	3	1.65e-07
CFAH_HUMAN	VSVLCQENYLIQEGEEITCK	1206.58	2	8.61e-22
CFAH_HUMAN	WQSIPLCVEK	630.327	2	1.75e-05
CFAH_HUMAN	WSHPPSCIK	556.272	2	0.001878
CFAH_HUMAN	WSSPPQCEGLPCK	773.345	2	3.18e-05
CFAH_HUMAN	WTGRPTCR	517.254	2	0.055456
CFAI_HUMAN	ACDGINDCGDQSDELCCK	1058.89	2	2.07e-132
CFAI_HUMAN	ADSPMDDFFQCVN(de)GK	865.862	2	1.97e-16
CFAI_HUMAN	AQLGDLPWQVAIK	719.907	2	2.68e-09
CFAI_HUMAN	DASGITCGGIYIGGCWILTAAHCLR	908.102	3	1.07e-05
CFAI_HUMAN	EANVACLDLGFQQGADTQR	698.329	3	0.018311
CFAI_HUMAN	EMECAGTYDGSIDACK	903.853	2	2.19e-72
CFAI_HUMAN	HGNTDSEGIVEVK	692.839	2	4.74e-27
CFAI_HUMAN	IVIEYVDR	503.783	2	0.001749
CFAI_HUMAN	KDCELPR	459.23	2	0.027022
CFAI_HUMAN	KYTHLSCDK	576.28	2	5.52e-05
CFAI_HUMAN	LPYQCPK	453.232	2	0.011695
CFAI_HUMAN	PFISQYNV	484.248	2	0.002379
CFAI_HUMAN	RAQLGDLPWQVAIK	532.308	3	1.81e-07
CFAI_HUMAN	SFPTYCQQK	579.767	2	0.00514
CFAI_HUMAN	SLECLHPGTK	571.288	2	0.001429
CFAI_HUMAN	TMGYQDFADVVCYTQK	963.425	2	5.53e-21
CFAI_HUMAN	VANYFDWISYHVGR	576.283	3	8.17e-06
CFAI_HUMAN	VANYFDWISYHVGRPFISQYNV	892.44	3	1.4e-05
CFAI_HUMAN	VFCQPWQR	560.772	2	0.001645
CFAI_HUMAN	VFSLQWGEVK	596.822	2	4.06e-10
CFAI_HUMAN	VTYTSQEDLVEK	706.352	2	0.00046
CFAI_HUMAN	VTYTSQEDLVEKK	513.935	3	0.024628
CFAI_HUMAN	YQIWTTVVDWIHPDLK	672.02	3	7.47e-07
CFAI_HUMAN	YTHLSCDK	512.232	2	0.042757
CG063_HUMAN	SSEILWN(de)LLEK	666.365	2	0.046826
CGRE1_HUMAN	GEAGGQAEAEGDAPGPR	784.851	2	5.12e-37
CGRE1_HUMAN	HVEPGEPLAPSPQEPQAVGR	699.024	3	0.000351
CGRE1_HUMAN	QETQEAPGPR	556.771	2	0.004286
CGRE1_HUMAN	RESLDPVQEPGGQAEADGDVPGPR	826.062	3	5.93e-09
CGRE1_HUMAN	TEVQLEHLSR	606.323	2	0.02994
CGRE1_HUMAN	VLETQDLN(de)GDGLMTPAELINFPGVALR	961.836	3	3.31e-07
CH3L1_HUMAN	DKQHFTTLIK	615.846	2	0.000139
CH3L1_HUMAN	EAGTLAYYEICDFLR	607.623	3	2.71e-17
CH3L1_HUMAN	EGDGSCFPDALDR	719.799	2	9.16e-05
CH3L1_HUMAN	FPLTNAIK	452.269	2	0.001561
CH3L1_HUMAN	FSNTDYAVGYMLR	768.862	2	9.55e-20
CH3L1_HUMAN	GNQWVGYDDQESVK	812.866	2	6.4e-23
CH3L1_HUMAN	GQEDASPDRFSNTDYAVGYMLR	831.377	3	1.23e-07
CH3L1_HUMAN	GTTGHHSPLFR	605.31	2	0.000756
CH3L1_HUMAN	ILGQQVPYATK	609.349	2	9.48e-12
CH3L1_HUMAN	ISQHLDFISIMTYDFHGAWR	813.064	3	3.13e-22
CH3L1_HUMAN	LVCYYTSWSQYR	813.375	2	4.79e-08
CH3L1_HUMAN	LVMGIPTFGR	545.808	2	0.00043
CH3L1_HUMAN	QHFTTLIK	494.285	2	0.05271
CH3L1_HUMAN	QLAGAMVWALDLDDFQGSFCGQDLR	938.439	3	0.008881
CH3L1_HUMAN	QLLLSAALSAGK	586.356	2	0.000412
CH3L1_HUMAN	SFTLASSETGVGAPISGPGIPGR	1079.56	2	1.79e-18
CH3L1_HUMAN	THGFDGLDLAWLYPGR	909.453	2	8.18e-21
CH3L1_HUMAN	TLLSVGGWNFGSQR	761.395	2	1.86e-40
CH3L1_HUMAN	VTIDSSYDIAK	606.312	2	2.76e-05
CHAD_HUMAN	AGAFDDLTELTYLYLDHNK	733.692	3	0.004289
CHD8_HUMAN	KN(de)NKAELN(de)CLGM(ox)EPVQTANSR	792.059	3	0.044531
CHD8_HUMAN	QLVLQPVK	462.798	2	0.036122
CHIO_HUMAN	PMVVDICIR	551.792	2	0.006275
CHL1_HUMAN	ACTSQGCGKPITEESSTLGEGSK	1192.54	2	5.02e-17
CHL1_HUMAN	CTASNFLGTATHDFHVIVEEPPR	866.752	3	2.04e-06
CHL1_HUMAN	DGNPFYFTDHR	684.803	2	1.49e-07
CHL1_HUMAN	GAGPESEPYIFQTPEGVPEQPTFLK	1359.67	2	3.52e-18
CHL1_HUMAN	GDLYFANVEEK	642.809	2	1.49e-16
CHL1_HUMAN	GEILLLECFAEGLPTPQVDWNK	1265.14	2	5.18e-23
CHL1_HUMAN	GLPPLHIYWMNIELEHIEQDER	911.455	3	2.17e-07
CHL1_HUMAN	GNPEPTFSWTK	632.304	2	0.001117
CHL1_HUMAN	GYQINWWK	547.775	2	0.001036
CHL1_HUMAN	IDPLEVEEGDPIVLPCNPPK	1116.07	2	5.48e-22
CHL1_HUMAN	IENVSYQDK	548.27	2	0.000702
CHL1_HUMAN	IPNEGHISHFQGK	732.374	2	6.88e-10
CHL1_HUMAN	ISGVNLTQK	480.28	2	0.048441
CHL1_HUMAN	KPQSAVYSTGSN(de)GILLCEAEGEPQPTIK	992.166	3	8.57e-12
CHL1_HUMAN	KTTVILPLAPFVR	485.642	3	0.000239
CHL1_HUMAN	LHMLELHCESK	698.84	2	3.49e-11
CHL1_HUMAN	LLLPPTESGSESSITILK	629.023	3	5.15e-15
CHL1_HUMAN	LTVNSSNSIK	531.794	2	0.000649
CHL1_HUMAN	NDYCCFAAFPR	710.793	2	2.03e-07
CHL1_HUMAN	SMEQN(de)GPGLEYR	690.815	2	1.12e-07
CHL1_HUMAN	SQPSQPSDHHETPPAAPDR	685.316	3	0.002147
CHL1_HUMAN	SQPSQPSDHHETPPAAPDRNPQNIR	926.11	3	1.04e-06
CHL1_HUMAN	TAVTANLDIR	537.302	2	3.14e-05
CHL1_HUMAN	TTEEDAGSYSCWVENAIGK	1058.96	2	3.25e-111
CHL1_HUMAN	TTVILPLAPFVR	663.911	2	7.89e-05
CHL1_HUMAN	VDKDTATLSWGLPK	765.912	2	5.34e-08
CHL1_HUMAN	VEEVKPLEGR	578.323	2	0.00081
CHL1_HUMAN	VIAVNEVGR	478.78	2	4.44e-05
CHL1_HUMAN	VMTPAVYAPYDVK	727.374	2	5.45e-09
CHL1_HUMAN	VNGSPVDN(de)HPFAGDVVFPR	1012.5	2	6.71e-15
CHL1_HUMAN	VQVAFPFDEYFQIECEAK	1110.52	2	3.19e-29
CHL1_HUMAN	VTWSTVPK	459.259	2	0.008437
CHLE_HUMAN	AILQSGSFNAPWAVTSLYEAR	761.059	3	0.014951
CI152_HUMAN	GGN(de)TPAPAESM(ox)VNAVWINK	978.486	2	0.065705
CJ131_HUMAN	EPLNPLLK	462.282	2	0.00723
CK5P2_HUMAN	AM(ox)EN(de)RYKSLLSESNK	885.447	2	0.031987
CLCA4_HUMAN	PENISEEN(de)ATHIFIAIK	642.671	3	0.057803
CLUS_HUMAN	ALQEYRK	454.254	2	0.036484
CLUS_HUMAN	ASSIIDELFQDR	697.352	2	1.48e-17
CLUS_HUMAN	ASSIIDELFQDRFFTR	648.999	3	0.000238
CLUS_HUMAN	CREILSVDCSTNNPSQAK	693.659	3	0.002472
CLUS_HUMAN	EILSVDCSTNNPSQAK	881.918	2	6.48e-73
CLUS_HUMAN	EIQNAVN(de)GVK	536.294	2	2.23e-07
CLUS_HUMAN	ELDESLQVAER	644.823	2	3.69e-49
CLUS_HUMAN	EPQDTYHYLPFSLPHR	1000.49	2	1.73e-28
CLUS_HUMAN	FMETVAEK	477.734	2	0.00194
CLUS_HUMAN	IDSLLENDR	537.775	2	2.97e-07
CLUS_HUMAN	KEDALNETR	538.273	2	0.010722
CLUS_HUMAN	KTLLSNLEEAK	623.357	2	7.26e-06
CLUS_HUMAN	KTLLSNLEEAKK	458.605	3	9.5e-06
CLUS_HUMAN	KYNELLK	454.267	2	0.019855
CLUS_HUMAN	LFDSDPITVTVPVEVSR	937.5	2	6.35e-37
CLUS_HUMAN	QQTHMLDVMQDHFSR	936.928	2	1.29e-52
CLUS_HUMAN	RELDESLQVAER	722.874	2	9.36e-12
CLUS_HUMAN	RPHFFFPK	538.296	2	0.009146
CLUS_HUMAN	TLIEKTNEERK	680.876	2	0.013771
CLUS_HUMAN	TLLSNLEEAK	559.309	2	9.23e-20
CLUS_HUMAN	TLLSNLEEAKK	623.357	2	4.71e-11
CLUS_HUMAN	VTTVASHTSDSDVPSGVTEVVVK	1157.59	2	1.17e-45
CLUS_HUMAN	YVNKEIQN(de)AVN(de)GVK	788.429	2	3.18e-30
CMGA_HUMAN	AEGNN(de)QAPGEEEEEEEEATNTHPPASLPSQK	1107.15	3	2.17e-12
CMGA_HUMAN	CIVEVISDTLSKPSPMPVSQECFETLR	1041.51	3	4.13e-16
CMGA_HUMAN	EAVEEPSSK	488.236	2	0.000767
CMGA_HUMAN	EDSLEAGLPLQVR	713.881	2	4.68e-07
CMGA_HUMAN	EEEEEMAVVPQGLFR	588.283	3	1.03e-12
CMGA_HUMAN	ELQDLALQGAK	593.328	2	3.04e-11
CMGA_HUMAN	EWEDSKR	475.223	2	0.075985
CMGA_HUMAN	GEQEHSQQKEEEEEMAVVPQGLFR	938.772	3	5.71e-13
CMGA_HUMAN	GLSAEPGWQAK	572.294	2	0.000337
CMGA_HUMAN	HSGFEDELSEVLENQSSQAELK	1238.58	2	7.2e-68
CMGA_HUMAN	LEGQEEEEDNRDSSMK	948.4	2	8.92e-21
CMGA_HUMAN	PQALPEPMQESK	677.838	2	0.000109
CMGA_HUMAN	RLEGQEEEEDNRDSSMK	684.637	3	1.17e-06
CMGA_HUMAN	RPEDQELESLSAIEAELEK	1093.55	2	1.94e-78
CMGA_HUMAN	SEALAVDGAGKPGAEEAQDPEGK	1113.53	2	1.89e-44
CMGA_HUMAN	SEALAVDGAGKPGAEEAQDPEGKGEQEHSQQK	1093.18	3	1.1e-12
CMGA_HUMAN	SGEATDGARPQALPEPMQESK	1100.02	2	8.77e-41
CMGA_HUMAN	SGELEQEEER	603.268	2	9.23e-20
CMGA_HUMAN	VAHQLQALR	518.307	2	0.000422
CMGA_HUMAN	YPGPQAEGDSEGLSQGLVDR	1037.99	2	1.31e-40
CMGA_HUMAN	YPGPQAEGDSEGLSQGLVDREK	778.04	3	1.07e-15
CN037_HUMAN	EIAHVHAEK	517.275	2	0.000702
CNDP1_HUMAN	AIHLDLEEYR	629.826	2	0.002941
CNDP1_HUMAN	ALEQDLPVNIK	620.351	2	9.48e-12
CNDP1_HUMAN	DGSTIPIAK	451.254	2	0.001757
CNDP1_HUMAN	EEILMHLWR	613.822	2	5.31e-05
CNDP1_HUMAN	EWVAIESDSVQPVPR	856.437	2	7.59e-25
CNDP1_HUMAN	FFSGVDYIVISDNLWISQR	753.72	3	1.45e-05
CNDP1_HUMAN	FIIEGMEEAGSVALEELVEK	1097.05	2	1.77e-40
CNDP1_HUMAN	FIIEGMEEAGSVALEELVEKEK	817.418	3	0.03006
CNDP1_HUMAN	FRQELFR	498.275	2	0.052248
CNDP1_HUMAN	GATDNKGPVLAWINAVSAFR	696.373	3	7.56e-05
CNDP1_HUMAN	GDGWLTDPYVLTEVDGK	932.952	2	3.01e-37
CNDP1_HUMAN	GNSYFMVEVK	587.285	2	7.52e-10
CNDP1_HUMAN	GPVLAWINAVSAFR	500.95	3	3.6e-12
CNDP1_HUMAN	HLEDVFSK	487.751	2	4.72e-05
CNDP1_HUMAN	KPAITYGTR	503.788	2	0.004388
CNDP1_HUMAN	LFAAFFLEMAQLH	769.398	2	3.16e-05
CNDP1_HUMAN	MFQEIVHK	516.271	2	0.00148
CNDP1_HUMAN	MMAVAADTLQR	603.803	2	3.36e-05
CNDP1_HUMAN	MVVSMTLGLHPWIANIDDTQYLAAK	929.812	3	2.37e-15
CNDP1_HUMAN	SVVLIPLGAVDDGEHSQNEK	1054.04	2	2.1e-40
CNDP1_HUMAN	TVFGTEPDMIR	633.314	2	0.000908
CNDP1_HUMAN	VFQYIDLHQDEFVQTLK	1062.05	2	5.87e-87
CNDP1_HUMAN	WNYIEGTK	505.751	2	0.003126
CNDP1_HUMAN	YPSLSIHGIEGAFDEPGTK	1009.5	2	2.26e-29
CNTFR_HUMAN	EYIIQVAAK	517.798	2	0.030999
CNTFR_HUMAN	HSPQEAPHVQYER	526.587	3	0.070064
CNTN1_HUMAN	AHSDGGDGVVSQVK	678.332	2	1.34e-08
CNTN1_HUMAN	ASPFPVYK	454.748	2	0.012796
CNTN1_HUMAN	ATSVALTWSR	546.296	2	0.001015
CNTN1_HUMAN	AVDLIPWMEYEFR	556.942	3	1.84e-05
CNTN1_HUMAN	DETMSPSTAFQVK	720.838	2	2.87e-10
CNTN1_HUMAN	DGEYVVEVR	533.265	2	5.01e-07
CNTN1_HUMAN	ELTITWAPLSR	643.859	2	0.000145
CNTN1_HUMAN	ENIHYQR	480.239	2	0.013717
CNTN1_HUMAN	FIPLIPIPER	597.866	2	0.00134
CNTN1_HUMAN	FVSQTN(de)GNLYIANVEASDK	690.677	3	0.001396
CNTN1_HUMAN	GDGPYSLVAVINSAQDAPSEAPTEVGVK	924.463	3	1.21e-07
CNTN1_HUMAN	GEPSIPSNR	478.744	2	0.049737
CNTN1_HUMAN	GFGPIFEEQPINTIYPEESLEGK	1297.64	2	1.28e-34
CNTN1_HUMAN	GMVLLCDPPYHFPDDLSYR	765.691	3	0.000342
CNTN1_HUMAN	GPPGPPGGLR	452.754	2	0.034661
CNTN1_HUMAN	GSDNHSPISK	521.252	2	0.001191
CNTN1_HUMAN	HSIEVPIPR	524.302	2	0.000573
CNTN1_HUMAN	IFNIQLEDEGIYECEAENIR	819.054	3	6.3e-07
CNTN1_HUMAN	ILALAPTFEMNPMK	788.418	2	5.55e-06
CNTN1_HUMAN	ILALAPTFEMNPMKK	568.646	3	0.003098
CNTN1_HUMAN	IVESYQIR	504.28	2	0.006041
CNTN1_HUMAN	KVLEPMPSTAEISTSGAVLK	686.71	3	6.86e-05
CNTN1_HUMAN	KVTVTNPDTGR	594.323	2	0.001282
CNTN1_HUMAN	MNN(de)GDVDLTSDR	668.794	2	1.36e-11
CNTN1_HUMAN	NDGGIYTCFAENNR	815.85	2	4.26e-52
CNTN1_HUMAN	NFMLDSN(de)GELLIR	761.391	2	0.000246
CNTN1_HUMAN	RYGHGVSEEDK	638.8	2	0.000893
CNTN1_HUMAN	STEATLSFGYLDPFPPEERPEVR	879.766	3	3.17e-25
CNTN1_HUMAN	TDGAAPNVAPSDVGGGGGR	827.893	2	1.54e-21
CNTN1_HUMAN	TILSDDWK	489.251	2	0.006411
CNTN1_HUMAN	TTKPYPADIVVQFK	803.946	2	2.53e-11
CNTN1_HUMAN	VIIECKPK	493.789	2	0.005966
CNTN1_HUMAN	VLEPMPSTAEISTSGAVLK	965.514	2	5.59e-21
CNTN1_HUMAN	VLYRPDGQHDGK	692.853	2	1.63e-05
CNTN1_HUMAN	VQVTSQEYSAR	634.318	2	5.02e-17
CNTN1_HUMAN	VTVTNPDTGR	530.276	2	3.97e-05
CNTN1_HUMAN	VVATNTLGR	465.772	2	0.000135
CNTN1_HUMAN	WLLNEFPVFITMDK	876.956	2	9.35e-23
CNTN1_HUMAN	WLLNEFPVFITMDKR	637.007	3	0.003351
CNTN1_HUMAN	YGHGVSEEDK	560.75	2	0.000615
CNTN1_HUMAN	YSMVGGNLVINNPDK	810.907	2	8.96e-32
CNTN1_HUMAN	YSMVGGNLVINNPDKQK	626.325	3	0.002514
CNTN1_HUMAN	YVHKDETMSPSTAFQVK	656.657	3	1.76e-05
CNTN1_HUMAN	YWAAHDKEEAANR	780.864	2	7.15e-13
CNTN2_HUMAN	AQDAGVYQCLASNPVGTVVSR	1096.54	2	5.7e-98
CNTN2_HUMAN	ETIGDLTILNAQLR	778.936	2	7.24e-31
CNTN2_HUMAN	EYQN(de)GDGFGYLLSFR	883.413	2	1.39e-11
CNTN2_HUMAN	FAQLNLAAEDTR	674.847	2	2.71e-09
CNTN2_HUMAN	FGFLQEFSK	551.783	2	2.07e-05
CNTN2_HUMAN	FPAETYALVGQQVTLECFAFGNPVPR	971.154	3	0.00027
CNTN2_HUMAN	GFDNHSPIAK	543.273	2	0.000691
CNTN2_HUMAN	GGEILIPCQPR	620.33	2	0.00081
CNTN2_HUMAN	GPPGPPGGVVVR	544.815	2	0.003504
CNTN2_HUMAN	HQLVGGNLVIMNPTK	810.949	2	6.09e-06
CNTN2_HUMAN	IIVQAQPEWLK	662.885	2	1.02e-05
CNTN2_HUMAN	LSLEDSGMYQCVAENK	922.414	2	4.47e-60
CNTN2_HUMAN	N(de)GEPLASQNR	543.271	2	0.005795
CNTN2_HUMAN	NWIEIPVPEDIGHALVQIR	733.736	3	0.000238
CNTN2_HUMAN	RGDGPESLTALVYSAEEEPR	726.023	3	0.000273
CNTN2_HUMAN	RPPGNISWTFSSSSLSIK	655.347	3	0.000379
CNTN2_HUMAN	TNPANIEGNAETAQVLGLTPWMDYEFR	1013.15	3	2.96e-16
CNTN2_HUMAN	TTGPGGDGIPAEVHIVR	559.298	3	0.001712
CNTN2_HUMAN	VEVLAGDLR	486.28	2	0.000841
CNTN2_HUMAN	VIASNILGTGEPSGPSSK	857.455	2	2.36e-22
CNTN2_HUMAN	VISDTEADIGSNLR	745.379	2	4.17e-37
CNTN2_HUMAN	VSGLHPNTK	476.765	2	0.003805
CNTN2_HUMAN	VTVTPDGTLIIR	642.88	2	0.000134
CNTN2_HUMAN	WLLNEFPNFIPTDGR	909.963	2	1.13e-16
CNTN2_HUMAN	YTCFAENFMGK	684.292	2	2.29e-07
CNTN2_HUMAN	YTCMAQTVVDSASK	780.856	2	4.33e-41
CNTN4_HUMAN	IEVQFPETVPTAK	729.896	2	0.00038
CNTP2_HUMAN	LLNTPDGSPYTWWVGK	917.463	2	1.42e-06
CNTP2_HUMAN	QISAIATQGR	522.794	2	0.041422
CNTP2_HUMAN	VQFNQIAPLK	579.338	2	0.001366
CNTP3_HUMAN	AATSGFTGCLSAVR	466.567	3	0.086617
CNTP3_HUMAN	INREEAVVM(ox)VEVN(de)Q(de)STK	973.505	2	0.004647
CNTP4_HUMAN	AQVTPEVQPGCR	671.333	2	0.000308
CNTP4_HUMAN	DGAGGWSPLVSNK	644.321	2	0.053996
CNTP4_HUMAN	EASLQVDQLTPK	664.857	2	0.000262
CNTP4_HUMAN	FIPLEWNPK	572.314	2	0.072203
CNTP4_HUMAN	LGPLLCQGDR	564.796	2	0.006453
CNTP4_HUMAN	QDGTPLSWWVGR	701.35	2	0.074437
CNTP4_HUMAN	YQEPDVVNFDFK	750.855	2	0.041
CO1A1_HUMAN	DVWKPEPCR	593.788	2	0.041533
CO1A1_HUMAN	NSVAYMDQQTGNLKK	566.283	3	0.02439
CO1A1_HUMAN	SGEYWIDPNQGCNLDAIK	1040.48	2	6.51e-40
CO1A1_HUMAN	SLSQQIENIR	594.323	2	4.85e-10
CO1A1_HUMAN	STGGISVPGPMGPSGPR	777.391	2	0.017008
CO1A1_HUMAN	VLCDDVICDETK	733.829	2	2.1e-08
CO1A2_HUMAN	AQPENIPAK	484.265	2	0.10201
CO1A2_HUMAN	GEAGAAGPAGPAGPR	618.311	2	0.000348
CO1A2_HUMAN	GETGPSGPVGPAGAVGPR	781.9	2	0.000216
CO1A2_HUMAN	GVGLGPGPMGLMGPR	698.366	2	0.00572
CO1A2_HUMAN	LSHPEWSSGYYWIDPNQGCTMDAIK	985.775	3	0.019106
CO1A2_HUMAN	VYCDFSTGETCIR	804.346	2	0.00112
CO2_HUMAN	ALHQVFEHMLDVSK	551.953	3	0.008865
CO2_HUMAN	AVISPGFDVFAK	625.843	2	0.000518
CO2_HUMAN	CSSNLVLTGSSER	705.339	2	0.001655
CO2_HUMAN	DFHINLFR	531.28	2	0.003257
CO2_HUMAN	DHENELLNK	556.273	2	2.05e-07
CO2_HUMAN	ECQGN(de)GVWSGTEPICR	925.402	2	4.23e-28
CO2_HUMAN	EILNINQK	486.28	2	0.003245
CO2_HUMAN	EVVTDQFLCSGTQEDESPCK	777.004	3	0.034549
CO2_HUMAN	GALISDQWVLTAAHCFR	648.997	3	0.001035
CO2_HUMAN	HAFILQDTK	536.793	2	0.000832
CO2_HUMAN	HAIILLTDGK	540.825	2	0.000719
CO2_HUMAN	KNQGILEFYGDDIALLK	646.351	3	5.21e-06
CO2_HUMAN	NQGILEFYGDDIALLK	904.976	2	1.08e-22
CO2_HUMAN	QHLGDVLNFLPL	683.38	2	0.000593
CO2_HUMAN	RNDYLDIYAIGVGK	532.951	3	0.000187
CO2_HUMAN	SSGQWQTPGATR	638.308	2	1.53e-05
CO2_HUMAN	VLMSVLNDNSR	624.325	2	0.001135
CO3_HUMAN	AAVYHHFISDGVR	491.253	3	9.91e-05
CO3_HUMAN	AAVYHHFISDGVRK	800.424	2	3.81e-11
CO3_HUMAN	ACEPGVDYVYK	650.798	2	0.000845
CO3_HUMAN	ADIGCTPGSGK	531.748	2	3.68e-05
CO3_HUMAN	AELQCPQPAAR	620.809	2	0.00011
CO3_HUMAN	AGDFLEANYMNLQR	547.928	3	5.05e-31
CO3_HUMAN	APSTWLTAYVVK	668.37	2	9.96e-06
CO3_HUMAN	AYYENSPQQVFSTEFEVK	1083.51	2	3.27e-79
CO3_HUMAN	CAEENCFIQK	649.779	2	1.48e-09
CO3_HUMAN	DAPDHQELNLDVSLQLPSR	716.363	3	0.001407
CO3_HUMAN	DFDFVPPVVR	595.814	2	0.000185
CO3_HUMAN	DICEEQVNSLPGSITK	895.436	2	5.65e-47
CO3_HUMAN	DKNRWEDPGK	622.805	2	0.097653
CO3_HUMAN	DSCVGSLVVK	532.277	2	0.000395
CO3_HUMAN	DSITTWEILAVSMSDKK	641.996	3	0.044336
CO3_HUMAN	DTWVEHWPEEDECQDEENQK	868.347	3	2.38e-80
CO3_HUMAN	DYAGVFSDAGLTFTSSSGQQTAQR	832.055	3	1.62e-25
CO3_HUMAN	EDIPPADLSDQVPDTESETR	1107.51	2	1.79e-40
CO3_HUMAN	EGVQKEDIPPADLSDQVPDTESETR	919.102	3	4.99e-07
CO3_HUMAN	ENEGFTVTAEGK	641.302	2	3.1e-08
CO3_HUMAN	EPGQDLVVLPLSITTDFIPSFR	1222.66	2	1.66e-22
CO3_HUMAN	EVVADSVWVDVK	673.354	2	2.28e-08
CO3_HUMAN	EYVLPSFEVIVEPTEK	939.991	2	4.22e-47
CO3_HUMAN	FISLGEACK	512.761	2	0.000269
CO3_HUMAN	FISLGEACKK	576.808	2	0.000453
CO3_HUMAN	FYHPEKEDGK	625.297	2	0.000162
CO3_HUMAN	FYHPEKEDGKLNK	802.908	2	3.85e-05
CO3_HUMAN	FYYIYNEK	570.275	2	0.004285
CO3_HUMAN	GLEVTITAR	480.28	2	0.000538
CO3_HUMAN	GQGTLSVVTMYHAK	746.385	2	1.01e-08
CO3_HUMAN	GVFVLNKK	452.785	2	0.00298
CO3_HUMAN	GYTQQLAFR	542.283	2	0.000149
CO3_HUMAN	HLIVTPSGCGEQ(de)N(de)MIGMTPTVIAVHYLDETEQWEK	1328.64	3	2.34e-21
CO3_HUMAN	HQQTVTIPPK	574.825	2	6.71e-05
CO3_HUMAN	HYLMWGLSSDFWGEKPNLSYIIGK	947.808	3	8.88e-10
CO3_HUMAN	IHWESASLLR	606.331	2	7.15e-05
CO3_HUMAN	ILLQGTPVAQMTEDAVDAER	1079.05	2	1.06e-95
CO3_HUMAN	IPIEDGSGEVVLSR	735.894	2	1.33e-16
CO3_HUMAN	ISLPESLKR	521.817	2	0.002996
CO3_HUMAN	KCCEDGMR	528.207	2	0.026926
CO3_HUMAN	KGYTQQLAFR	606.331	2	0.003373
CO3_HUMAN	KLVLSSEK	452.28	2	0.008461
CO3_HUMAN	KQELSEAEQATR	695.353	2	9.74e-44
CO3_HUMAN	KVEGTAFVIFGIQDGEQR	665.35	3	2.11e-14
CO3_HUMAN	KVFLDCCNYITELR	915.948	2	9.15e-52
CO3_HUMAN	KVLLDGVQNPR	619.865	2	3.15e-16
CO3_HUMAN	LCRDELCR	561.264	2	0.025627
CO3_HUMAN	LSINTHPSQKPLSITVR	946.042	2	4.74e-20
CO3_HUMAN	LVAYYTLIGASGQR	756.415	2	6.41e-17
CO3_HUMAN	NTLIIYLDK	546.819	2	4.03e-07
CO3_HUMAN	NTMILEICTR	625.816	2	7.59e-14
CO3_HUMAN	PGMPFDLMVFVTNPDGSPAYR	771.035	3	0.004658
CO3_HUMAN	QCQDLGAFTESMVVFGCPN	1080.46	2	1.37e-39
CO3_HUMAN	QDSLSSQNQLGVLPLSWDIPELVNMGQWK	1094.89	3	5.95e-13
CO3_HUMAN	QELSEAEQATR	631.305	2	1.85e-11
CO3_HUMAN	QKPDGVFQEDAPVIHQEMIGGLR	855.436	3	5.07e-05
CO3_HUMAN	QLYNVEATSYALLALLQLK	717.741	3	7.66e-40
CO3_HUMAN	QLYNVEATSYALLALLQLKDFDFVPPVVR	1108.28	3	1.09e-05
CO3_HUMAN	QPSSAFAAFVK	576.807	2	0.006982
CO3_HUMAN	QPVPGQQMTLK	613.832	2	0.000995
CO3_HUMAN	RAPSTWLTAYVVK	497.949	3	3.71e-05
CO3_HUMAN	RIPIEDGSGEVVLSR	813.945	2	1.44e-40
CO3_HUMAN	RQGALELIK	514.317	2	0.001585
CO3_HUMAN	SEETKENEGFTVTAEGK	928.432	2	5.22e-47
CO3_HUMAN	SEFPESWLWNVEDLKEPPK	777.383	3	5.87e-05
CO3_HUMAN	SEFPESWLWN(de)VEDLKEPPKN(de)GISTK	977.491	3	0.002549
CO3_HUMAN	SGIPIVTSPYQIHFTK	894.489	2	1.34e-07
CO3_HUMAN	SGQSEDRQPVPGQQMTLK	993.49	2	1.87e-20
CO3_HUMAN	SGSDEVQVGQQR	645.308	2	2.16e-17
CO3_HUMAN	SLKVVPEGIR	549.338	2	0.017443
CO3_HUMAN	SLYVSATVILHSGSDMVQAER	755.052	3	1.62e-05
CO3_HUMAN	SNLDEDIIAEENIVSR	908.95	2	6.2e-73
CO3_HUMAN	SSLSVPYVIVPLK	467.95	3	2.91e-07
CO3_HUMAN	SSLSVPYVIVPLKTGLQEVEVK	795.793	3	0.005064
CO3_HUMAN	SYTVAIAGYALAQMGR	836.43	2	6.54e-07
CO3_HUMAN	TELRPGETLNVNFLLR	624.683	3	2.73e-28
CO3_HUMAN	TGLQEVEVK	501.777	2	5.42e-07
CO3_HUMAN	TIYTPGSTVLYR	685.87	2	1.46e-06
CO3_HUMAN	TKKQELSEAEQATR	540.285	3	0.000845
CO3_HUMAN	TMQALPYSTVGNSN(de)NYLHLSVLR	860.108	3	1.89e-08
CO3_HUMAN	TVMVNIENPEGIPVK	820.44	2	6.77e-41
CO3_HUMAN	VELLHNPAFCSLATTK	900.97	2	4.31e-37
CO3_HUMAN	VFLDCCNYITELR	851.901	2	1.12e-47
CO3_HUMAN	VFLDCCNYITELRR	620.303	3	0.073633
CO3_HUMAN	VHQYFNVELIQPGAVK	921.5	2	1.82e-10
CO3_HUMAN	VLLDGVQNPR	555.817	2	1.56e-09
CO3_HUMAN	VPVAVQGEDTVQSLTQGDGVAK	1099.57	2	1.02e-54
CO3_HUMAN	VQLSNDFDEYIMAIEQTIK	1129.06	2	2.47e-79
CO3_HUMAN	VRVELLHNPAFCSLATTK	686.039	3	8.91e-07
CO3_HUMAN	VSHSEDDCLAFK	704.315	2	3.32e-06
CO3_HUMAN	VTIKPAPETEK	606.846	2	0.000145
CO3_HUMAN	VVLVSLQSGYLFIQTDK	637.36	3	0.000564
CO3_HUMAN	VYAYYNLEESCTR	834.373	2	2.68e-60
CO3_HUMAN	YFKPGMPFDLMVFVTNPDGSPAYR	917.111	3	1.69e-06
CO3_HUMAN	YISKYELDK	579.806	2	0.042077
CO3_HUMAN	YRGDQDATMSILDISMMTGFAPDTDDLK	1036.47	3	9.54e-06
CO3_HUMAN	YYGGGYGSTQATFMVFQALAQYQK	893.757	3	1.9e-18
CO3_HUMAN	YYTYLIMNK	604.805	2	2.34e-07
CO3A1_HUMAN	FTYTVLEDGCTK	717.335	2	0.009738
CO3A1_HUMAN	INTDEIMTSLK	632.827	2	4.28e-11
CO4A_HUMAN	AACAQLNDFLQEYGTQGCQV	1137	2	8.59e-31
CO4A_HUMAN	ADGSYAAWLSR	598.789	2	3.16e-05
CO4A_HUMAN	AEFQDALEK	525.759	2	8.08e-05
CO4A_HUMAN	AEFQDALEKLNMGITDLQGLR	788.074	3	1.21e-06
CO4A_HUMAN	AEMADQASAWLTR	725.344	2	8.66e-07
CO4A_HUMAN	ALEILQEEDLIDEDDIPVR	1113.06	2	7.96e-30
CO4A_HUMAN	ASAGLLGAHAAAITAYALTLTK	1043.09	2	1.09e-10
CO4A_HUMAN	AVGSGATFSHYYYMILSR	1011.99	2	5.35e-29
CO4A_HUMAN	CCQDGVTR	498.206	2	0.00455
CO4A_HUMAN	CSVFYGAPSK	558.264	2	0.000536
CO4A_HUMAN	DDPDAPLQPVTPLQLFEGR	1054.54	2	4.33e-21
CO4A_HUMAN	DFALLSLQVPLK	672.401	2	7.14e-12
CO4A_HUMAN	DFALLSLQVPLKDAK	829.48	2	1.64e-40
CO4A_HUMAN	DHAVDLIQK	519.783	2	0.000289
CO4A_HUMAN	DSSTWLTAFVLK	456.579	3	1.59e-08
CO4A_HUMAN	EELVYELNPLDHR	813.91	2	1.78e-14
CO4A_HUMAN	EFHLHLR	476.262	2	0.017037
CO4A_HUMAN	EGAIHREELVYELNPLDHR	764.058	3	1.75e-29
CO4A_HUMAN	EMSGSPASGIPVK	630.319	2	1.17e-06
CO4A_HUMAN	EPFLSCCQFAESLR	872.396	2	3.38e-12
CO4A_HUMAN	EPFLSCCQFAESLRK	936.443	2	9.54e-09
CO4A_HUMAN	EVYMPSSIFQDDFVIPDISEPGTWK	967.462	3	3.77e-09
CO4A_HUMAN	EYLIMGLDGATYDLEGHPQYLLDSNSWIEEMPSER	1357.96	3	1.49e-21
CO4A_HUMAN	FACYYPR	488.721	2	0.014061
CO4A_HUMAN	FGLLDEDGK	497.249	2	0.000754
CO4A_HUMAN	FGLLDEDGKK	561.296	2	9.52e-05
CO4A_HUMAN	FQ(de)ILTLWLPDSLTTWEIHGLSLSK	933.51	3	0.04666
CO4A_HUMAN	GCGEQ(de)TMIYLAPTLAASR	969.975	2	7.86e-19
CO4A_HUMAN	GHLFLQTDQPIYNPGQR	992.506	2	5.17e-37
CO4A_HUMAN	GLCVATPVQLR	607.34	2	0.000766
CO4A_HUMAN	GLEEELQFSLGSK	718.868	2	5.95e-28
CO4A_HUMAN	GLQDEDGYR	526.736	2	0.000352
CO4A_HUMAN	GPEVQLVAHSPWLK	780.931	2	1.55e-40
CO4A_HUMAN	GQIVFMNR	482.756	2	0.002116
CO4A_HUMAN	GQIVFMNREPK	659.851	2	0.001013
CO4A_HUMAN	GSFEFPVGDAVSK	670.331	2	7.42e-07
CO4A_HUMAN	HLVPGAPFLLQALVR	544.332	3	2.65e-12
CO4A_HUMAN	ITQVLHFTK	543.819	2	0.000577
CO4A_HUMAN	KADGSYAAWLSR	662.836	2	3.25e-17
CO4A_HUMAN	KEVYMPSSIFQDDFVIPDISEPGTWK	1010.16	3	9.74e-07
CO4A_HUMAN	KYVLPNFEVK	618.854	2	0.001066
CO4A_HUMAN	LELSVDGAK	466.259	2	0.001175
CO4A_HUMAN	LGQYASPTAK	518.278	2	7.76e-07
CO4A_HUMAN	LLATLCSAEVCQCAEGK	637.299	3	7.34e-38
CO4A_HUMAN	LLLFSPSVVHLGVPLSVGVQ(de)LQDVPR	923.873	3	5.27e-31
CO4A_HUMAN	LNMGITDLQGLR	665.862	2	6.02e-19
CO4A_HUMAN	LQETSNWLLSQQQADGSFQDPCPVLDR	1044.83	3	4.08e-51
CO4A_HUMAN	LTVAAPPSGGPGFLSIER	884.984	2	3.55e-05
CO4A_HUMAN	LTVAAPPSGGPGFLSIERPDSRPPR	858.798	3	0.003223
CO4A_HUMAN	LVNGQSHISLSK	641.86	2	7.87e-12
CO4A_HUMAN	MRPSTDTITVMVENSHGLR	715.358	3	1.08e-14
CO4A_HUMAN	NNVPCSPK	458.222	2	0.004738
CO4A_HUMAN	PVAFSVVPTAAAAVSLK	543.319	3	1.42e-14
CO4A_HUMAN	PVQGVAYVR	494.783	2	0.000742
CO4A_HUMAN	QGSFQGGFR	492.239	2	0.000829
CO4A_HUMAN	QYRN(de)GESVK	540.776	2	0.072007
CO4A_HUMAN	RCCQDGVTR	576.256	2	0.000911
CO4A_HUMAN	RCSVFYGAPSK	636.314	2	0.002507
CO4A_HUMAN	RGHLFLQTDQPIYNPGQR	714.04	3	1.74e-07
CO4A_HUMAN	RHLVPGAPFLLQALVR	596.365	3	2.23e-10
CO4A_HUMAN	SCGLHQLLR	542.291	2	0.000801
CO4A_HUMAN	SFFPENWLWR	691.339	2	6.13e-07
CO4A_HUMAN	SHALQLNNR	526.784	2	0.000758
CO4A_HUMAN	SHKPLNMGK	506.274	2	0.003834
CO4A_HUMAN	STQDTVIALDALSAYWIASHTTEER	1389.68	2	1.42e-18
CO4A_HUMAN	TEQWSTLPPETK	708.855	2	3.85e-09
CO4A_HUMAN	TLEIPGNSDPNMIPDGDFNSYVR	1276.09	2	1.1e-08
CO4A_HUMAN	TTNIQGINLLFSSR	782.429	2	1.82e-65
CO4A_HUMAN	TYNVLDMK	492.248	2	0.000459
CO4A_HUMAN	VDFTLSSER	527.265	2	4.75e-07
CO4A_HUMAN	VDVQAGACEGK	567.267	2	3.79e-05
CO4A_HUMAN	VEYGFQVK	485.256	2	0.002936
CO4A_HUMAN	VGDTLNLNLR	557.815	2	8.69e-10
CO4A_HUMAN	VGLSGMAIADVTLLSGFHALR	1064.58	2	1.55e-22
CO4A_HUMAN	VHYTVCIWR	617.314	2	0.000571
CO4A_HUMAN	VLSLAQEQVGGSPEK	771.413	2	1.55e-79
CO4A_HUMAN	VQQPDCR	451.712	2	0.01207
CO4A_HUMAN	VQQPDCREPFLSCCQFAESLR	876.399	3	3.49e-10
CO4A_HUMAN	VTASDPLDTLGSEGALSPGGVASLLR	1242.15	2	5.39e-63
CO4A_HUMAN	VTASDPLDTLGSEGALSPGGVASLLRLPR	950.518	3	3.24e-08
CO4A_HUMAN	VVEEQESR	488.241	2	0.003052
CO4A_HUMAN	YIYGKPVQGVAYVR	806.947	2	8.24e-16
CO4A_HUMAN	YVLPNFEVK	554.806	2	0.000992
CO4A_HUMAN	YVSHFETEGPHVLLYFDSVPTSR	894.107	3	1.79e-09
CO4B_HUMAN	AEMADQAAAWLTR	717.346	2	2.87e-14
CO4B_HUMAN	GSSTWLTAFVLK	655.362	2	3.34e-08
CO4B_HUMAN	LQETSNWLLSQQQADGSFQDLSPVIHR	1033.18	3	1.46e-29
CO4B_HUMAN	PVAFSVVPTAATAVSLK	829.48	2	8.1e-07
CO5_HUMAN	AFTECCVVASQLR	770.866	2	6.24e-09
CO5_HUMAN	ATLLDIYK	468.774	2	0.004348
CO5_HUMAN	DINYVNPVIK	587.827	2	0.004653
CO5_HUMAN	DSEITFIK	476.753	2	0.031882
CO5_HUMAN	DSSVPNTGTAR	552.768	2	0.015783
CO5_HUMAN	EGMLSIMSYR	593.784	2	0.000508
CO5_HUMAN	FSYSSGHVHLSSENK	839.895	2	0.035245
CO5_HUMAN	GGSASTWLTAFALR	719.378	2	1.45e-08
CO5_HUMAN	LQGTLPVEAR	542.312	2	0.000944
CO5_HUMAN	MVETTAYALLTSLNLK	589.991	3	4.08e-15
CO5_HUMAN	TDAPDLPEENQAR	728.34	2	3.49e-05
CO5_HUMAN	TSTSEEVCSFYLK	775.856	2	4.86e-05
CO5_HUMAN	VTCTNAELVK	567.795	2	0.000286
CO5_HUMAN	YGGGFYSTQDTINAIEGLTEYSLLVK	947.14	3	0.000364
CO5A2_HUMAN	EGN(de)PGPLGPIGPPGVR	505.276	3	0.018257
CO6_HUMAN	ALNHLPLEYNSALYSR	620.992	3	2.2e-07
CO6_HUMAN	DLHLSDVFLK	593.827	2	0.011261
CO6_HUMAN	ENPAVIDFELAPIVDLVR	670.702	3	1.15e-14
CO6_HUMAN	GGNQLYCVK	519.756	2	0.00071
CO6_HUMAN	HEGSFIQGAEK	601.794	2	1.38e-05
CO6_HUMAN	IGESIELTCPK	623.822	2	0.000608
CO6_HUMAN	NSGLTEEEAK	539.257	2	3.16e-05
CO6_HUMAN	QLEWGLER	515.77	2	0.061103
CO6_HUMAN	RSENINHNSAFK	472.905	3	0.001479
CO6_HUMAN	SENINHNSAFK	630.803	2	0.003565
CO6_HUMAN	SEYGAALAWEK	612.799	2	1.35e-06
CO6_HUMAN	SVLRPSQFGGQPCTAPLVAFQPCIPSK	981.506	3	1.47e-05
CO6_HUMAN	TECIKPVVQEVLTITPFQR	753.413	3	0.022051
CO6_HUMAN	TFSEWLESVK	613.309	2	0.000895
CO6_HUMAN	VPANLENVGFEVQTAEDDLK	730.031	3	3.92e-15
CO6_HUMAN	VPANLENVGFEVQTAEDDLKTDFYK	948.131	3	1.48e-05
CO6A1_HUMAN	DAEEAISQTIDTIVDMIK	664.667	3	3.52e-21
CO6A1_HUMAN	DTTPLNVLCSPGIQVVSVGIK	1099.1	2	2.61e-15
CO6A1_HUMAN	DVFDFIPGSDQLNVISCQGLAPSQGRPGLSLVK	1172.27	3	2.31e-13
CO6A1_HUMAN	ENYAELLEDAFLK	777.889	2	9.51e-07
CO6A1_HUMAN	GDPGFEGER	482.212	2	0.029259
CO6A1_HUMAN	GLEQLLVGGSHLK	450.93	3	0.003721
CO6A1_HUMAN	GTYTDCAIK	514.74	2	0.000537
CO6A1_HUMAN	GVFHQTVSR	515.776	2	0.000731
CO6A1_HUMAN	IALVITDGR	479.291	2	0.001583
CO6A1_HUMAN	KGLEQLLVGGSHLK	493.628	3	0.000299
CO6A1_HUMAN	LLLFSDGNSQGATPAAIEK	966.508	2	1.76e-29
CO6A1_HUMAN	NLVWNAGALHYSDEVEIIQGLTR	866.782	3	1.16e-08
CO6A1_HUMAN	NNVEQVCCSFECQPAR	666.614	3	0.002607
CO6A1_HUMAN	TAEYDVAYGESHLFR	586.61	3	0.000109
CO6A1_HUMAN	TDPAHDVR	455.723	2	0.072137
CO6A1_HUMAN	VAVVQYSGTGQQRPER	592.312	3	0.021196
CO6A1_HUMAN	VFSVAITPDHLEPR	790.926	2	2.27e-06
CO6A1_HUMAN	VPSYQALLR	523.804	2	0.00058
CO6A3_HUMAN	ALGSAIEYTIENVFESAPNPR	760.05	3	0.000936
CO6A3_HUMAN	GMTQLQGTR	496.254	2	0.035367
CO7_HUMAN	AASGTQNNVLR	565.8	2	0.000327
CO7_HUMAN	ACGACPLWGK	560.258	2	0.001331
CO7_HUMAN	DGFVQDEGTMFPVGK	813.878	2	1.46e-31
CO7_HUMAN	DSCTLPASAEK	589.772	2	0.005154
CO7_HUMAN	ELSHLPSLYDYSAYR	605.297	3	8.87e-08
CO7_HUMAN	GCPTEEGCGER	626.241	2	0.000992
CO7_HUMAN	GGGAGFISGLSYLELDNPAGNK	1069.03	2	2.63e-31
CO7_HUMAN	GGGAGFISGLSYLELDNPAGNKR	765.058	3	0.00203
CO7_HUMAN	GQSISVTSIRPCAAETQ	902.947	2	1.25e-27
CO7_HUMAN	IACVLPVLMDGIQSHPQKPFYTVGEK	976.511	3	0.000723
CO7_HUMAN	ILPLTVCK	472.286	2	0.009431
CO7_HUMAN	LIDQYGTHYLQSGSLGGEYR	753.035	3	9.98e-06
CO7_HUMAN	LKQNDFNSVEEK	725.863	2	2.2e-07
CO7_HUMAN	LLEPHCFPLSLVPTEFCPSPPALK	917.142	3	1.52e-05
CO7_HUMAN	LSGNVLSYTFQVK	728.396	2	4.1e-13
CO7_HUMAN	LTPLYELVK	538.324	2	0.00499
CO7_HUMAN	MHVLHCQGR	569.274	2	0.000626
CO7_HUMAN	NVVYTCNEGYSLIGNPVAR	1063.52	2	2.7e-94
CO7_HUMAN	QNDFNSVEEK	605.273	2	7.27e-07
CO7_HUMAN	RPSCDIDKPPPN(de)IELTGN(de)GYNELTGQFR	1063.52	3	3.16e-06
CO7_HUMAN	RYSAWAESVTNLPQVIK	654.687	3	1.96e-05
CO7_HUMAN	SCVGETTESTQCEDEELEHLR	837.02	3	2.87e-10
CO7_HUMAN	SSGWHFVVK	523.775	2	0.000719
CO7_HUMAN	SVAVYGQYGGQPCVGNAFETQSCEPTR	988.109	3	3.25e-16
CO7_HUMAN	SYTSHTNEIHK	658.816	2	1.56e-16
CO7_HUMAN	VLFYVDSEK	550.288	2	0.000657
CO7_HUMAN	VTVSCSGGMSLEGPSAFLCGSSLK	811.049	3	0.000145
CO7_HUMAN	WLVGEMHCQK	644.303	2	0.000116
CO7_HUMAN	YSAWAESVTNLPQVIK	903.476	2	1.4e-21
CO8A_HUMAN	AIDEDCSQYEPIPGSQK	968.934	2	5.42e-37
CO8A_HUMAN	AMAVEDIISR	552.79	2	0.000357
CO8A_HUMAN	HLVCN(de)GDQ(de)DCLDGSDEDDCEDVR	908.347	3	2.97e-18
CO8A_HUMAN	HTSLGPLEAK	526.791	2	0.033804
CO8A_HUMAN	INVGGGLSGDHCK	657.317	2	0.000204
CO8A_HUMAN	KPYNFLK	455.264	2	0.030738
CO8A_HUMAN	LGSLGAACEQTQTEGAK	860.913	2	1.42e-28
CO8A_HUMAN	LYYGDDEK	501.725	2	0.08532
CO8A_HUMAN	MESLGITSR	497.256	2	0.000512
CO8A_HUMAN	QAQCGQDFQCK	685.285	2	0.036182
CO8A_HUMAN	YNPVVIDFEMQPIHEVLR	733.714	3	2.97e-05
CO8B_HUMAN	DFGTHYITEAVLGGIYEYTLVMNK	912.12	3	3.36e-05
CO8B_HUMAN	EYESYSDFER	662.771	2	0.000417
CO8B_HUMAN	GDYTLNNVHACAK	731.841	2	2.63e-06
CO8B_HUMAN	GGASEHITTLAYQELPTADLMQEWGDAVQYNPAIIK	1310.98	3	1.32e-11
CO8B_HUMAN	IPGIFELGISSQSDR	809.926	2	0.000104
CO8B_HUMAN	SDLEVAHYK	531.267	2	0.005206
CO8B_HUMAN	SLMLHYEFLQR	479.584	3	0.000524
CO8G_HUMAN	AEATTLHVAPQGTAMAVSTFR	720.369	3	0.000563
CO8G_HUMAN	FLQEQGHR	507.76	2	0.002541
CO8G_HUMAN	LDGICWQVR	573.79	2	5.45e-05
CO8G_HUMAN	QLYGDTGVLGR	589.812	2	0.001123
CO8G_HUMAN	RPASPISTIQPK	647.878	2	0.00526
CO8G_HUMAN	SLPVSDSVLSGFEQR	810.916	2	6.33e-23
CO8G_HUMAN	VQEAHLTEDQIFYFPK	655.664	3	0.000846
CO8G_HUMAN	YGFCEAADQFHVLDEVR	685.98	3	2.81e-11
CO9_HUMAN	AEQCCEETASSISLHGK	953.918	2	1.98e-28
CO9_HUMAN	AIEDYINEFSVR	728.36	2	4.97e-37
CO9_HUMAN	ALPTTYEK	461.748	2	0.091248
CO9_HUMAN	DGNTLTYYR	551.762	2	0.000781
CO9_HUMAN	DRDGNTLTYYR	687.326	2	5.42e-07
CO9_HUMAN	FEGIACEISK	577.282	2	0.000969
CO9_HUMAN	FTPTETNK	469.236	2	0.048349
CO9_HUMAN	GTVIDVTDFVNWASSINDAPVLISQK	930.484	3	1.67e-07
CO9_HUMAN	LSPIYNLVPVK	621.877	2	1.6e-05
CO9_HUMAN	NRDVVLTTTFVDDIK	579.313	3	0.003067
CO9_HUMAN	QCVPTEPCEDAEDDCGN(de)DFQCSTGR	983.034	3	2.02e-05
CO9_HUMAN	RPWNVASLIYETK	788.928	2	1.2e-12
CO9_HUMAN	SIEVFGQFN(de)GK	613.315	2	0.09617
CO9_HUMAN	SIEVFGQFN(de)GKR	461.246	3	0.005019
CO9_HUMAN	TAGYGINILGMDPLSTPFDN(de)EFYNGLCNR	1083.84	3	2.65e-13
CO9_HUMAN	TEHYEEQIEAFK	508.572	3	0.000108
CO9_HUMAN	TSNFNAAISLK	583.315	2	2.79e-07
CO9_HUMAN	VVEESELAR	516.273	2	0.000149
COCH_HUMAN	GVISNSGGPVR	521.786	2	0.000399
COCH_HUMAN	WSASFTVTK	513.767	2	0.05638
COFA1_HUMAN	AFLSSHLQDLSTIVR	562.978	3	0.001998
COIA1_HUMAN	AAVPIVNLK	462.798	2	0.021754
COIA1_HUMAN	ADDILASPPR	527.781	2	0.005269
COIA1_HUMAN	DELLFPSWEALFSGSEGPLKPGAR	868.443	3	0.005448
COIA1_HUMAN	DFQPVLHLVALNSPLSGGMR	717.718	3	2.07e-07
COIA1_HUMAN	GADFQCFQQAR	664.297	2	3.02e-07
COIA1_HUMAN	GLELEPGAGLFVAQAGGADPDKFQGVIAELK	1033.21	3	0.035071
COIA1_HUMAN	LQDLYSIVR	553.814	2	0.001173
COIA1_HUMAN	LTESYCETWR	672.799	2	0.027724
COIA1_HUMAN	SVWHGSDPN(de)GR	606.282	2	0.074094
COIA1_HUMAN	TEAPSATGQASSLLGGR	801.908	2	9.78e-21
COL12_HUMAN	DRETVLSSAL	545.791	2	0.091997
COL12_HUMAN	EEQQWIK	480.743	2	0.036329
COL12_HUMAN	ESHWIGLTDSER	477.229	3	0.002685
COL12_HUMAN	SSHLVFINTR	587.323	2	0.003516
COL12_HUMAN	WLDGTSPDYK	591.278	2	0.001197
COLQ_HUMAN	GDSGVMGPPGK	501.24	2	0.016109
CON__A2A4G1	EVSLGGSSGGGGSSSSSSNFHISVEESVDGK	976.443	3	0.077299
CON__ENSEMBL:ENSBTAP00000024146	DMYSFLQ(de)DMGLK	724.334	2	1.18e-22
CON__ENSEMBL:ENSBTAP00000031900	DIFTGLIGPMK	596.326	2	1.16e-05
CON__ENSEMBL:ENSBTAP00000031900	DNEDFQESNR	627.256	2	7.41e-05
CON__ENSEMBL:ENSBTAP00000031900	IYHSHIDAPK	590.81	2	7.08e-07
CON__ENSEMBL:ENSBTAP00000031900	KLISVDTEHSNIYLQN(de)GPN(de)R	766.733	3	1.57e-17
CON__ENSEMBL:ENSBTAP00000031900	LISVDTEHSNIYLQNGPN(de)R	724.035	3	1.46e-11
CON__ENSEMBL:ENSBTAP00000031900	MFTTAPDQVDK	626.798	2	0.001206
CON__ENSEMBL:ENSBTAP00000031900	MYYSAVDPTK	587.777	2	5.3e-07
CON__ENSEMBL:ENSBTAP00000031900	MYYSAVDPTKDIFTGLIGPMK	783.062	3	0.000292
CON__ENSEMBL:ENSBTAP00000031900	PVWLGFLGPIIK	670.411	2	3.42e-05
CON__ENSEMBL:ENSBTAP00000031900	TYCSEPEK	507.216	2	0.008327
CON__ENSEMBL:ENSBTAP00000031900	TYSDHPEK	488.723	2	0.054955
CON__P00761	IITHPNFN(de)GNTLDNDIMLIK	761.732	3	8.72e-07
CON__P00761	LGEHNIDVLEGNEQFINAAK	737.707	3	1.99e-10
CON__P00761	LSSPATLNSR	523.286	2	0.000827
CON__P01030	GHLFLQTDQPVYNPGQR	985.498	2	0.005488
CON__P01030	RGHLFLQTDQPVYNPGQR	709.368	3	0.011201
CON__P01966	VGGHAAEYGAEALER	510.584	3	5.54e-06
CON__P02769	AEFVEVTK	461.748	2	0.00397
CON__P02769	CCAADDKEACFAVEGPK	643.271	3	0.006376
CON__P02769	CCTKPESER	583.751	2	0.008161
CON__P02769	DAFLGSFLYEYSR	784.376	2	2.77e-19
CON__P02769	DAIPENLPPLTADFAEDK	978.484	2	0.002726
CON__P02769	DAIPENLPPLTADFAEDKDVCK	820.066	3	0.019738
CON__P02769	DDPHACYSTVFDKLK	599.283	3	0.005242
CON__P02769	DLGEEHFK	487.733	2	0.00392
CON__P02769	DTHKSEIAHR	597.305	2	0.002826
CON__P02769	ECCDKPLLEK	646.305	2	0.067184
CON__P02769	ECCHGDLLECADDR	875.336	2	9.19e-12
CON__P02769	ETYGDMADCCEK	739.766	2	3.69e-05
CON__P02769	EYEATLEECCAK	751.811	2	1.26e-33
CON__P02769	FKDLGEEHFK	625.315	2	0.000152
CON__P02769	GLVLIAFSQYLQQCPFDEHVK	831.427	3	1.39e-05
CON__P02769	HLVDEPQNLIK	653.362	2	2.65e-12
CON__P02769	KQTALVELLK	571.861	2	0.060851
CON__P02769	LFTFHADICTLPDTEK	636.646	3	4.92e-08
CON__P02769	LGEYGFQN(de)ALIVR	740.402	2	1.45e-08
CON__P02769	LKECCDKPLLEK	511.599	3	0.000281
CON__P02769	LKPDPNTLCDEFK	526.261	3	0.000414
CON__P02769	LVNELTEFAK	582.319	2	7.27e-07
CON__P02769	LVVSTQTALA	501.796	2	3.73e-05
CON__P02769	MPCTEDYLSLILNR	575.617	3	4.58e-09
CON__P02769	QEPERNECFLSHK	558.595	3	0.099193
CON__P02769	QNCDQFEK	534.725	2	0.06492
CON__P02769	QTALVELLK	507.814	2	0.004567
CON__P02769	RHPEYAVSVLLR	480.609	3	6.88e-05
CON__P02769	RHPYFYAPELLYYANK	682.348	3	6.48e-15
CON__P02769	RPCFSALTPDETYVPK	940.965	2	5.66e-07
CON__P02769	SHCIAEVEK	536.759	2	0.000473
CON__P02769	SLHTLFGDELCK	473.903	3	2.74e-08
CON__P02769	TCVADESHAGCEK	732.299	2	1.61e-05
CON__P02769	TVMENFVAFVDK	700.351	2	2.69e-13
CON__P02769	YICDN(de)QDTISSK	722.325	2	0.002022
CON__P02769	YN(de)GVFQECCQAEDK	874.357	2	5.06e-24
CON__P15497	DLEEVKQK	494.77	2	0.015634
CON__P15497	Q(de)KVQ(de)ELQ(de)DKLSPLAQ(de)ELR	708.399	3	0.052969
CON__P41361	FSPENTRK	489.754	2	0.045899
CON__P41361	LPGIVAEGR	456.27	2	0.000772
CON__P41361	NNNDN(de)IFLSPLSISTAFAMTK	1149.58	2	2.5e-15
CON__P41361	RVWELSK	459.264	2	0.018313
CON__P41361	TSDQIHFFFAK	670.836	2	4.67e-11
CON__Q28085	ECDTN(de)GWTNDIPICEVVK	1075.48	2	1.21e-28
COTL1_HUMAN	FALITWIGENVSGLQR	601.997	3	3.82e-06
CP089_HUMAN	ATIADLILSALER	462.605	3	8.89e-20
CP089_HUMAN	EFQLTLQPGFWK	747.394	2	0.000287
CP089_HUMAN	SDVCLVQLLGTGTDSSEPCGLSDLCR	947.102	3	1.1e-06
CP089_HUMAN	WAQEPLLQPLSLR	775.939	2	2.54e-06
CP089_HUMAN	WLEAILSWQK	637.351	2	0.005787
CP135_HUMAN	YMEDIQSN(de)VKLLTAER	637.328	3	0.069196
CP7B1_HUMAN	AFSISQ(de)LQ(de)KN(de)HDMNDELHLCYQFLQGK	1088.86	3	0.065008
CPN2_HUMAN	QLVCPVTR	486.769	2	0.064044
CPN2_HUMAN	VVFLNTQLCQFRPDAFGGLPR	812.427	3	0.000407
CPSF5_HUMAN	LM(ox)TEILGR	466.766	2	0.036907
CQ085_HUMAN	ALIN(de)M(ox)SSLPAQ(de)DKIR	552.976	3	0.062389
CRAC1_HUMAN	DEASSVEVTWPDGK	760.35	2	3.94e-07
CRAC1_HUMAN	DKPVCVNTYGSYR	520.249	3	0.000134
CRAC1_HUMAN	DVAAEAGVSK	473.746	2	0.000644
CRAC1_HUMAN	EHGDPLIEELNPGDALEPEGR	763.033	3	2.08e-10
CRAC1_HUMAN	FRDIASPK	467.262	2	0.09298
CRAC1_HUMAN	FSMPSPVR	460.737	2	0.018635
CRAC1_HUMAN	GDGTFVDAAASAGVDDPHQHGR	727.331	3	1.7e-07
CRAC1_HUMAN	GNQGFNNNWLR	660.316	2	0.000347
CRAC1_HUMAN	GTGGVVTDFDGDGMLDLILSHGESMAQPLSVFR	1141.22	3	3.76e-18
CRAC1_HUMAN	GVALADFNR	481.757	2	0.000811
CRAC1_HUMAN	GVSVGPILSSSASDIFCDNEN(de)GPNFLFHNR	1084.18	3	1.09e-16
CRAC1_HUMAN	IIDGGSGYLCEMEPVAHFGLGK	784.046	3	0.001395
CRAC1_HUMAN	LYLQMSTHGK	589.306	2	0.001836
CRAC1_HUMAN	NNRWEDILSDEVNVAR	643.986	3	2.38e-10
CRAC1_HUMAN	NVASGEMNSVLEILYPR	631.325	3	1.14e-15
CRAC1_HUMAN	QGNAIGVTACDIDGDGR	859.892	2	1e-28
CRAC1_HUMAN	RLVNIAVDER	592.841	2	0.01118
CRAC1_HUMAN	SSPYYALR	478.746	2	0.071553
CRAC1_HUMAN	VDIVYGNWN(de)GPHR	509.589	3	0.000287
CRAC1_HUMAN	WEDILSDEVNVAR	773.381	2	3.57e-19
CREG1_HUMAN	FVTHVSDWGALATISTLEAVR	758.403	3	0.012882
CRP_HUMAN	ESDTSYVSLK	564.775	2	0.033047
CRP_HUMAN	GYSIFSYATK	568.785	2	6.57e-06
CS010_HUMAN	SYLYFTQFK	598.803	2	0.000992
CS010_HUMAN	TAVAHRPGAFK	577.826	2	0.049135
CSF1_HUMAN	AFLLVQDIMEDTMR	841.419	2	1.14e-05
CSF1_HUMAN	DPPEPGSPR	476.231	2	0.028974
CSF1_HUMAN	FNSVPLTDTGHER	736.861	2	6.99e-05
CSF1_HUMAN	SHSSGSVLPLGELEGR	542.282	3	4.33e-07
CSF1_HUMAN	STCQSFEPPETPVVK	853.409	2	2.56e-12
CSF1_HUMAN	TFYETPLQLLEK	741.399	2	1.08e-05
CSF1R_HUMAN	CDEAQVLQVWDDPYPEVLSQEPFHK	1010.47	3	1.72e-18
CSF1R_HUMAN	FIQSQDYQCSALMGGR	930.923	2	3.54e-47
CSF1R_HUMAN	HSTSMFFR	506.738	2	0.003192
CSF1R_HUMAN	HTFTLSLPR	536.302	2	0.001715
CSF1R_HUMAN	LAIPQQSDFHNNR	513.928	3	0.008123
CSF1R_HUMAN	VIPGPPALTLVPAELVR	581.358	3	7.84e-05
CSPG2_HUMAN	ETTVLVAQN(de)GNIK	693.884	2	5.66e-05
CSPG2_HUMAN	FTFEEAAK	471.733	2	0.010175
CSPG2_HUMAN	ITEEFLGK	468.756	2	0.017754
CSPG2_HUMAN	LATVGELQAAWR	657.862	2	0.000377
CSPG2_HUMAN	LLASDAGLYR	539.799	2	0.069617
CSPG2_HUMAN	VSVPTHPEAVGDASLTVVK	636.015	3	8.93e-05
CSPG5_HUMAN	EAGSAVEAEELVK	666.339	2	2.27e-06
CSTN1_HUMAN	AASEFESSEGVFLFPELR	1007.99	2	1.19e-09
CSTN1_HUMAN	AMQHISYLNSR	660.33	2	0.000515
CSTN1_HUMAN	ATVHIQVN(de)DVNEYAPVFK	682.022	3	0.000224
CSTN1_HUMAN	DYSFTIQAYDCGKGPDGTNVK	779.355	3	0.000469
CSTN1_HUMAN	EGLDLQVLEDSGR	715.86	2	1.35e-47
CSTN1_HUMAN	EPFTISVWMR	633.322	2	0.016059
CSTN1_HUMAN	ETILCSSDK	526.751	2	0.001187
CSTN1_HUMAN	GCDRDTYSEK	615.757	2	0.00444
CSTN1_HUMAN	GNLAGLTLR	457.775	2	0.000252
CSTN1_HUMAN	GVQIQAHPSQLVLTLEGEDLGELDK	897.14	3	4.89e-13
CSTN1_HUMAN	HHYSLYVHGCR	714.834	2	1.59e-14
CSTN1_HUMAN	IHGQNVPFDAVVVDK	819.437	2	5.67e-23
CSTN1_HUMAN	IPDGVVSVSPK	549.314	2	0.000761
CSTN1_HUMAN	ISIKPTCTPGWQGWNNR	672.336	3	5.44e-10
CSTN1_HUMAN	ISLSGVHHFAR	612.336	2	0.000963
CSTN1_HUMAN	KETILCSSDK	590.798	2	0.001583
CSTN1_HUMAN	KKETILCSSDK	654.846	2	0.015552
CSTN1_HUMAN	KVIDCLYTCK	650.326	2	8.89e-05
CSTN1_HUMAN	KYRPAEFHWK	454.576	3	0.011323
CSTN1_HUMAN	LDCELQK	453.224	2	0.004272
CSTN1_HUMAN	LICSELN(de)GR	531.275	2	0.000709
CSTN1_HUMAN	LTVTAYDCGK	564.274	2	7e-07
CSTN1_HUMAN	LTVTAYDCGKK	628.322	2	0.003028
CSTN1_HUMAN	QFPTPGIR	458.257	2	0.036073
CSTN1_HUMAN	RATEDVLVK	515.799	2	0.002748
CSTN1_HUMAN	VEAVDADCSPQFSQICSYEIITPDVPFTVDKDGYIK	1369.65	3	1.65e-15
CSTN1_HUMAN	VIDCLYTCK	586.279	2	0.000219
CSTN1_HUMAN	YISNEFK	450.727	2	0.071647
CSTN1_HUMAN	YRPAEFHWK	617.312	2	0.056339
CSTN3_HUMAN	ESLLLDTTSLQQR	752.405	2	3.88e-19
CSTN3_HUMAN	GHQPPPEMAGHSLASSHR	948.451	2	7.91e-06
CTDS1_HUMAN	QTPVQYLLPEAKAQ(de)DSDK	677.685	3	0.041386
CTGF_HUMAN	DGAPCIFGGTVYR	706.836	2	0.002377
CTNA1_HUMAN	LLEPLVTQ(de)VTTLVNTN(de)SKGPSN(de)KK	861.157	3	0.063239
CTND2_HUMAN	KDAM(ox)TAQNTGISTLYR	590.634	3	0.045283
CUL1_HUMAN	QEQETTHKN(de)IEEDRK	628.974	3	0.027179
CUTA_HUMAN	LAACVNLIPQITSIYEWK	707.047	3	0.007662
CUTA_HUMAN	SVHPYEVAEVIALPVEQGNFPYLQWVR	1047.55	3	5.17e-12
CUTA_HUMAN	TQSSLVPALTDFVR	767.418	2	2.94e-06
CUX1_HUMAN	SETPQ(de)N(de)SPLPSSPIVPM(ox)SK	998.507	2	0.014353
CUX1_HUMAN	SFQGEIDALSK	597.804	2	0.084388
CXL16_HUMAN	ISSDSPPSVQFMNR	782.875	2	1.52e-11
CYTC_HUMAN	AFCSFQIYAVPWQGTMTLSK	1168.07	2	5.88e-15
CYTC_HUMAN	ALDFAVGEYNK	613.807	2	8.26e-08
CYTC_HUMAN	ASNDMYHSR	540.731	2	7.01e-18
CYTC_HUMAN	KAFCSFQIYAVPWQGTMTLSK	1232.11	2	7.07e-07
CYTC_HUMAN	KQIVAGVNYFLDVELGR	961.031	2	1.53e-36
CYTC_HUMAN	LVGGPMDASVEEEGVR	548.935	3	8.83e-22
CYTC_HUMAN	LVGGPMDASVEEEGVRR	900.95	2	6.36e-21
CYTC_HUMAN	QIVAGVNYFLDVELGR	896.984	2	3.38e-47
CYTC_HUMAN	RALDFAVGEYNK	461.574	3	0.000147
CYTC_HUMAN	TQPNLDNCPFHDQPHLK	1030.98	2	1.17e-37
CYTC_HUMAN	TQPNLDNCPFHDQPHLKR	739.693	3	0.000247
CYTL1_HUMAN	ALSQEITR	459.257	2	0.003846
CYTL1_HUMAN	DFNLLQVSEPSEPCVR	945.457	2	0.03623
CYTL1_HUMAN	DFVASPPCWK	603.785	2	0.00566
CYTL1_HUMAN	LYLDIHNYCVLDK	555.949	3	0.058217
CYTM_HUMAN	AQSQLVAGIK	507.801	2	0.039383
CYTM_HUMAN	VTGDHVDLTTCPLAAGAQQEK	737.696	3	0.001006
DAF_HUMAN	EIYCPAPPQIDN(de)GIIQGER	724.025	3	0.000642
DAF_HUMAN	LTCLQNLK	495.277	2	0.000706
DAF_HUMAN	QSVTYACNK	535.751	2	0.022057
DAF_HUMAN	REPSLSPK	457.259	2	0.030828
DAF_HUMAN	SCPNPGEIR	515.243	2	0.082841
DAF_HUMAN	TSFPEDTVITYK	700.851	2	0.005375
DAF_HUMAN	WSTAVEFCK	564.264	2	0.000537
DAG1_HUMAN	EALPSWLHWDSQSHTLEGLPLDTDK	959.135	3	9.18e-05
DAG1_HUMAN	EGAMSAQLGYPVVGWHIANK	710.027	3	0.00068
DAG1_HUMAN	GVHYISVSATR	595.32	2	0.000151
DAG1_HUMAN	KVVEN(de)GALLSWK	672.388	2	1.06e-23
DAG1_HUMAN	LFDMSAFMAGPGNAK	778.866	2	3.02e-23
DAG1_HUMAN	LGCSLNQNSVPDIHGVEAPAR	745.371	3	3.47e-07
DAG1_HUMAN	LVPVVNNR	455.778	2	0.039002
DAG1_HUMAN	SFSEVELHNMK	660.817	2	6.09e-33
DAG1_HUMAN	VTIPTDLIASSGDIIK	548.314	3	4.53e-21
DAG1_HUMAN	VVEN(de)GALLSWK	608.341	2	0.000558
DB129_HUMAN	N(de)YLQYGTPNVLNEDVQEM(ox)LKPAK	888.783	3	0.064602
DCD_HUMAN	DAVEDLESVGK	581.286	2	0.000825
DCD_HUMAN	ENAGEDPGLAR	564.768	2	0.000899
DCD2C_HUMAN	HIN(de)VFTNGR	529.281	2	0.073173
DESP_HUMAN	SMSFQGIR	463.232	2	0.071131
DESP_HUMAN	SQ(de)LQ(de)ISN(de)N(de)RTLELQGLIN(de)DLQRER	946.845	3	0.064107
DEUP1_HUMAN	ELFSVM(ox)Q(de)DQ(de)PNHEKELNK	1093.53	2	0.013328
DHPR_HUMAN	AALDGTPGMIGYGMAK	776.879	2	5.38e-15
DHPR_HUMAN	EGGLLTLAGAK	515.301	2	0.006174
DHPR_HUMAN	GAVHQLCQSLAGK	684.857	2	2.27e-06
DHX29_HUMAN	IIGVIN(de)EHKKQ(de)N(de)N(de)DK	583.992	3	0.055322
DHX8_HUMAN	Q(de)M(ox)LGIM(ox)DR	482.242	2	0.045185
DIAC_HUMAN	ATYIQNYR	514.762	2	0.012474
DIAC_HUMAN	DIIDPAFR	473.754	2	0.05271
DKK3_HUMAN	DCQPGLCCAFQR	756.314	2	4.11e-13
DKK3_HUMAN	DQDGEILLPR	578.304	2	9.7e-14
DKK3_HUMAN	DSECCGDQLCVWGHCTK	1056.41	2	7.72e-73
DKK3_HUMAN	EPAAAAAALLGGEEI	691.862	2	7.06e-41
DKK3_HUMAN	EVEELMEDTQHK	744.338	2	4.31e-44
DKK3_HUMAN	EVPDEYEVGSFMEEVR	638.953	3	1.26e-10
DKK3_HUMAN	EVPDEYEVGSFMEEVRQELEDLER	976.447	3	0.000301
DKK3_HUMAN	GLLFPVCTPLPVEGELCHDPASR	1282.64	2	2.06e-12
DKK3_HUMAN	LLDLITWELEPDGALDR	985.018	2	1.42e-28
DKK3_HUMAN	QELEDLER	516.254	2	0.00404
DKK3_HUMAN	SAVEEMEAEEAAAK	732.83	2	1.68e-40
DKK3_HUMAN	SHECIIDEDCGPSMYCQ(de)FASFQYTCQPCR	1216.15	3	1.48e-24
DKK3_HUMAN	SLTEEMALR	525.269	2	0.000138
DKK3_HUMAN	SLTEEMALREPAAAAAALLGGEEI	1207.12	2	2.52e-17
DLG4_HUMAN	EQLMN(de)SSLGSGTASLR	825.91	2	0.037362
DMD_HUMAN	ELHEEAVR	491.752	2	0.05838
DMD_HUMAN	ENVSHVNDLAR	627.316	2	0.029973
DMD_HUMAN	LVEPQISELNHR	478.929	3	0.000417
DNER_HUMAN	IDYCILDPCR	662.805	2	0.023979
DNER_HUMAN	VSTCVPGESHANDLECSGK	682.967	3	0.017479
DNER_HUMAN	VTATGFQQCSLIDGR	826.907	2	1.83e-17
DPB1_HUMAN	M(ox)CRHN(de)YELGGPM(ox)TLQRR	1060.01	2	0.072531
DPP2_HUMAN	GHTELLTVEQALADFAELLR	742.731	3	0.001586
DPYD_HUMAN	GFVN(de)IRAVPEEM(ox)ELAKEEK	730.381	3	0.072453
DYH11_HUMAN	QVTCHLAK	478.753	2	0.061103
DYH7_HUMAN	SVLTAAGN(de)LK	487.288	2	0.056782
DYST_HUMAN	Q(de)HVIDVQILIDGKYYQ(de)ADQ(de)LVQ(de)R	914.824	3	0.041394
ECM1_HUMAN	ACPSHQPDISSGLELPFPPGVPTLDNIK	996.171	3	1.53e-09
ECM1_HUMAN	AWEDTLDK	489.233	2	0.003555
ECM1_HUMAN	AWEDTLDKYCDR	524.565	3	0.094657
ECM1_HUMAN	DILTIDIGR	508.293	2	0.000117
ECM1_HUMAN	DPALCCYLSPGDEQVNCFNINYLR	973.436	3	1.5e-12
ECM1_HUMAN	ELLALIQLER	599.364	2	9.75e-20
ECM1_HUMAN	ELPSLQHPNEQK	710.365	2	8.04e-06
ECM1_HUMAN	EVGPPLPQEAVPLQK	801.449	2	2.92e-08
ECM1_HUMAN	FCEAEFSVK	558.756	2	0.001187
ECM1_HUMAN	FSCFQEEAPQPHYQLR	679.648	3	1.37e-06
ECM1_HUMAN	HPPSPTRDECFAR	785.365	2	0.05041
ECM1_HUMAN	LDGFPPGRPSPDNLNQICLPNR	826.417	3	0.000181
ECM1_HUMAN	LLPAQLPAEK	540.327	2	0.012453
ECM1_HUMAN	LTFINDLCGPR	653.335	2	3.49e-11
ECM1_HUMAN	LVWEEAMSR	560.777	2	0.000379
ECM1_HUMAN	NLPATDPLQR	562.807	2	0.009083
ECM1_HUMAN	NVALVSGDTENAK	659.336	2	9.55e-20
ECM1_HUMAN	QGETLNFLEIGYSR	813.91	2	1.49e-22
ECM1_HUMAN	RAPYPNYDR	576.284	2	0.003026
ECM1_HUMAN	THHHLCCR	560.749	2	0.010241
[truncated: 2,721 more rows]
